# Supplementary material for: Analytical and computational workflow for in-depth analysis of oxidized complex lipids in blood plasma
Source: PubMed Central journal article supplement (PMC9626469; doi:10.1038/s41467-022-33225-9), 2022-11-01

## Supplementary Data 6.

MS2 spectra acquired using stDDA and used for the annotation of **oxidized PC** (oxPC) species in group pooled blood plasma samples of obese non-diabetic (OND) and obese with type 2 diabetes (OT2D) individuals. Structure-related fragmentation ions are colour-coded according to the legend provided. Annotated lipids for each group pool are sorted by their precursor  $m/z$ .

**OND\_pool**

# PC(16:1\_18:2<O>)

[oxPC+HCOO]<sup>-</sup> XIC 816.5396 NL: 2.08E3

## RT 12.0

- Fragments containing oxFAs
- Fragments related to water loss
- Fragments not containing oxFAs
- Fragments containing methylated oxFAs
- Fragments related to CO<sub>2</sub> loss
- Position-specific fragments

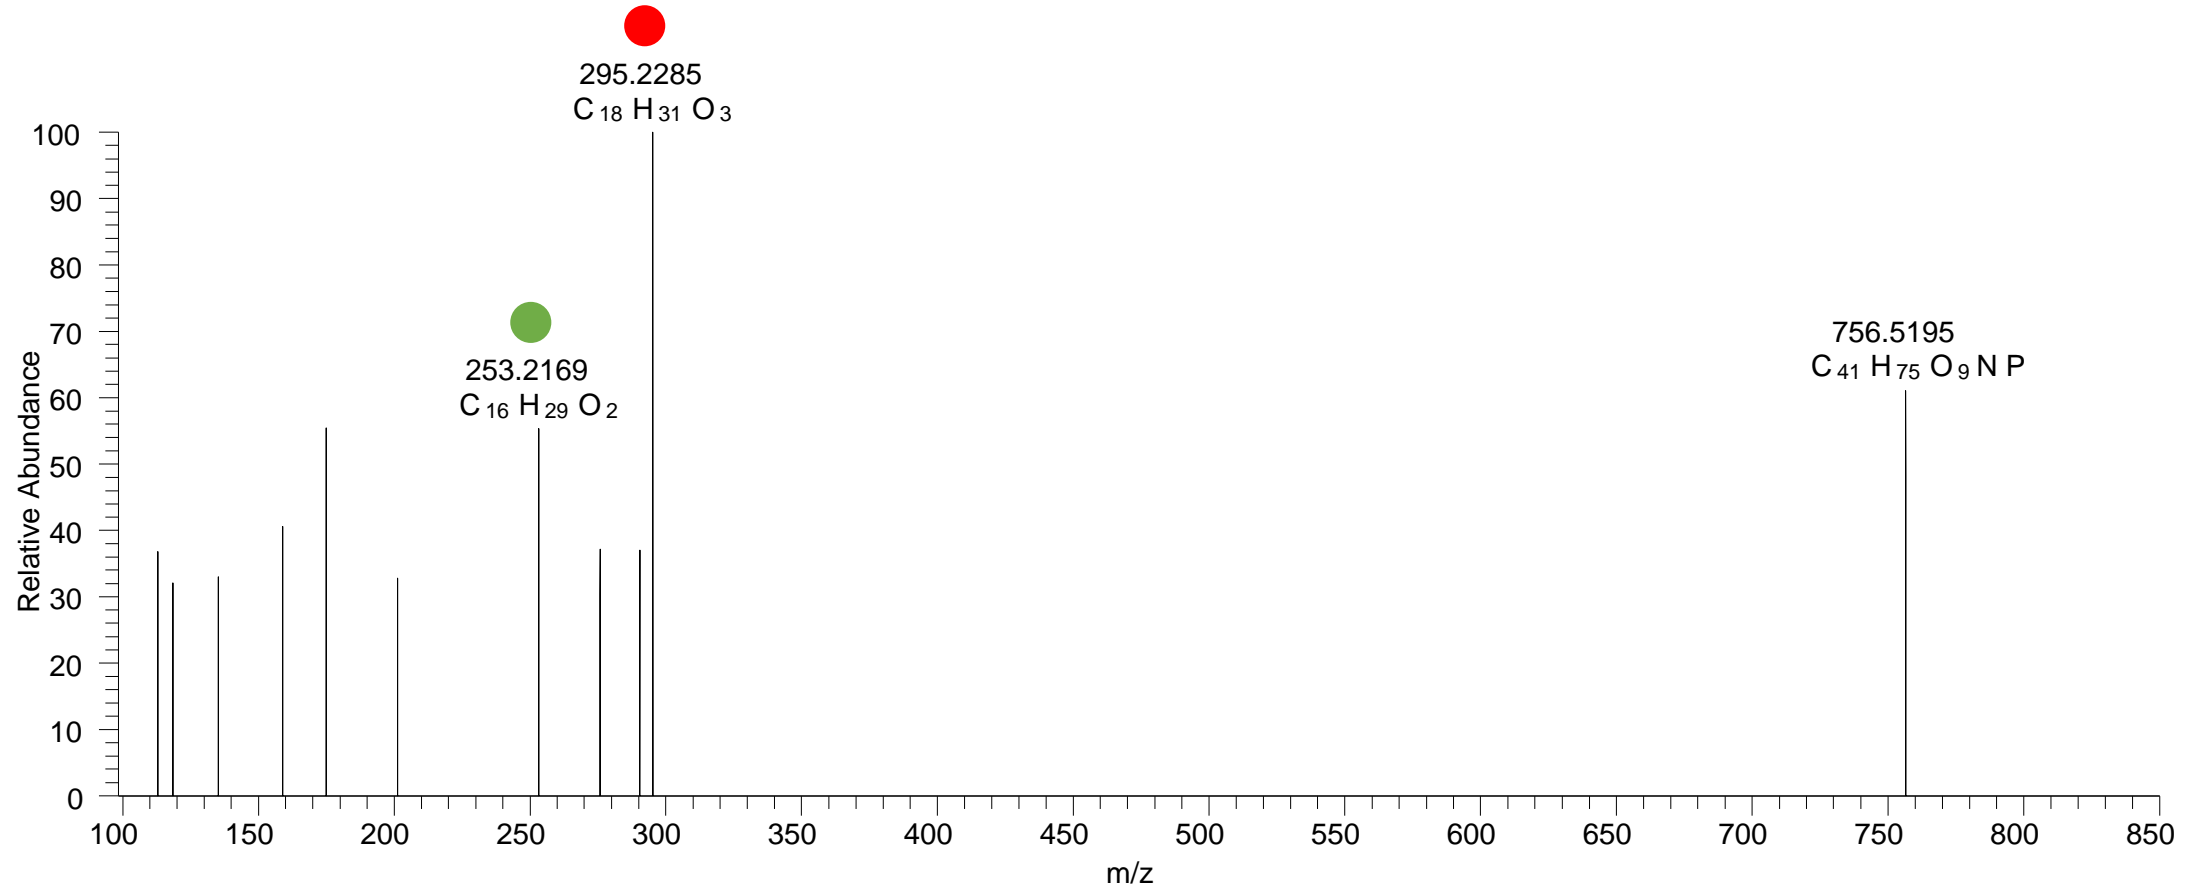

# PC(16:0\_18:3<O>)

[oxPC+HCOO]<sup>-</sup> XIC 816.5396 NL: 1.10E3

## RT 12.4

- Fragments containing oxFAs
- Fragments related to water loss
- Fragments not containing oxFAs
- Fragments containing methylated oxFAs
- Fragments related to CO<sub>2</sub> loss
- Position-specific fragments

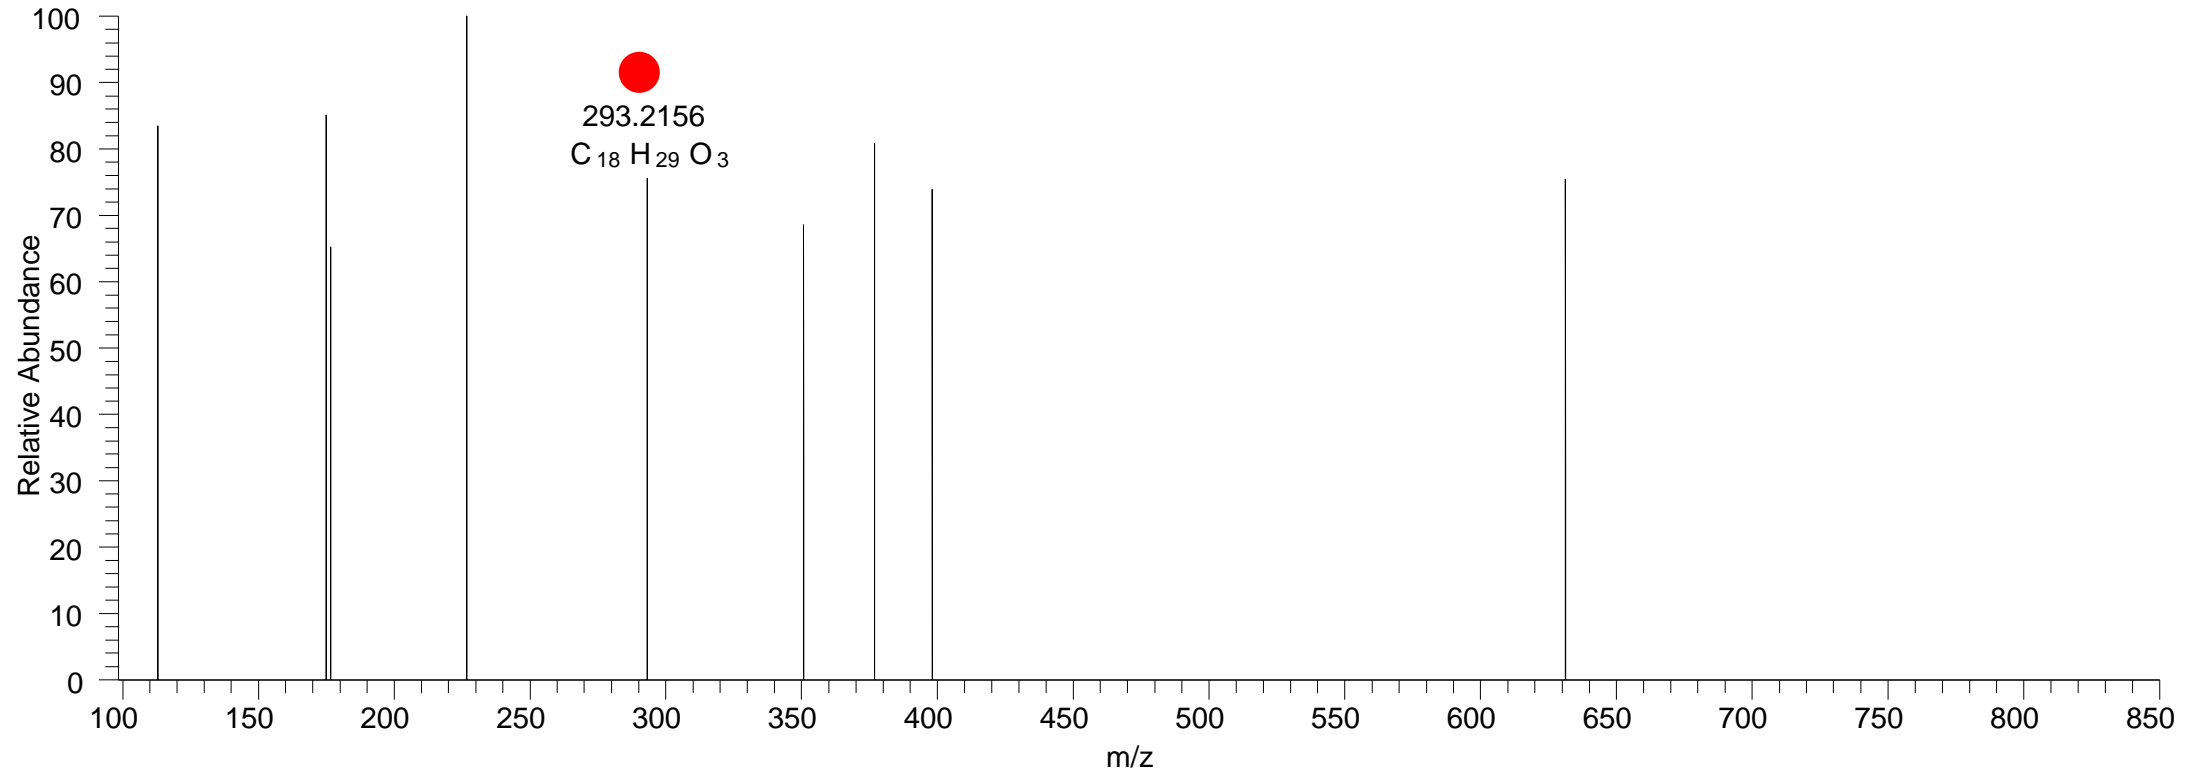

# PC(16:0\_18:2<OH>)

[oxPC+HCOO]<sup>-</sup> XIC 818.5553 NL: 1.35E4

## RT 12.6

- Fragments containing oxFAs
- Fragments related to water loss
- Fragments not containing oxFAs
- Fragments containing methylated oxFAs
- Fragments related to CO<sub>2</sub> loss
- Position-specific fragments

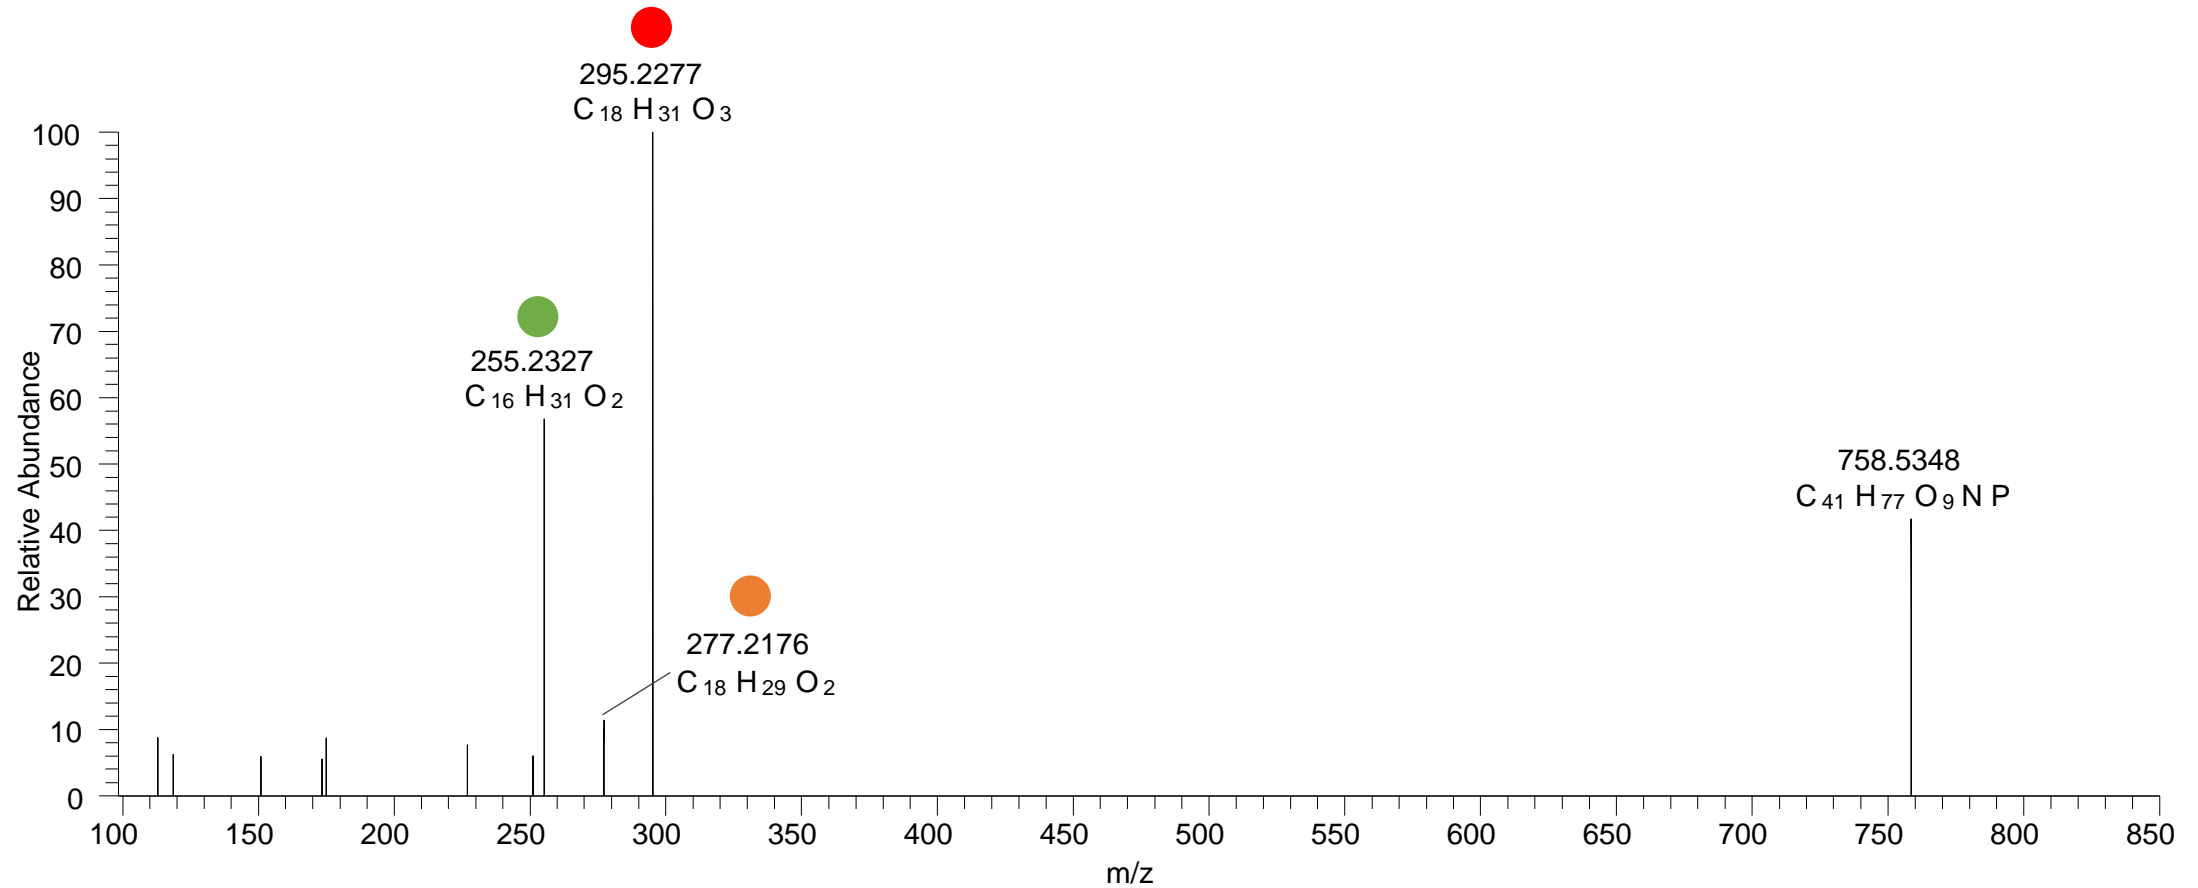

# PC(16:0\_18:2<OH{13}>)

[oxPC+HCOO]<sup>-</sup> XIC 818.5553 NL: 9.74E4

## RT 13.4

- Fragments containing oxFAs
- Fragments related to water loss
- Fragments not containing oxFAs
- Fragments containing methylated oxFAs
- Fragments related to CO<sub>2</sub> loss
- Position-specific fragments

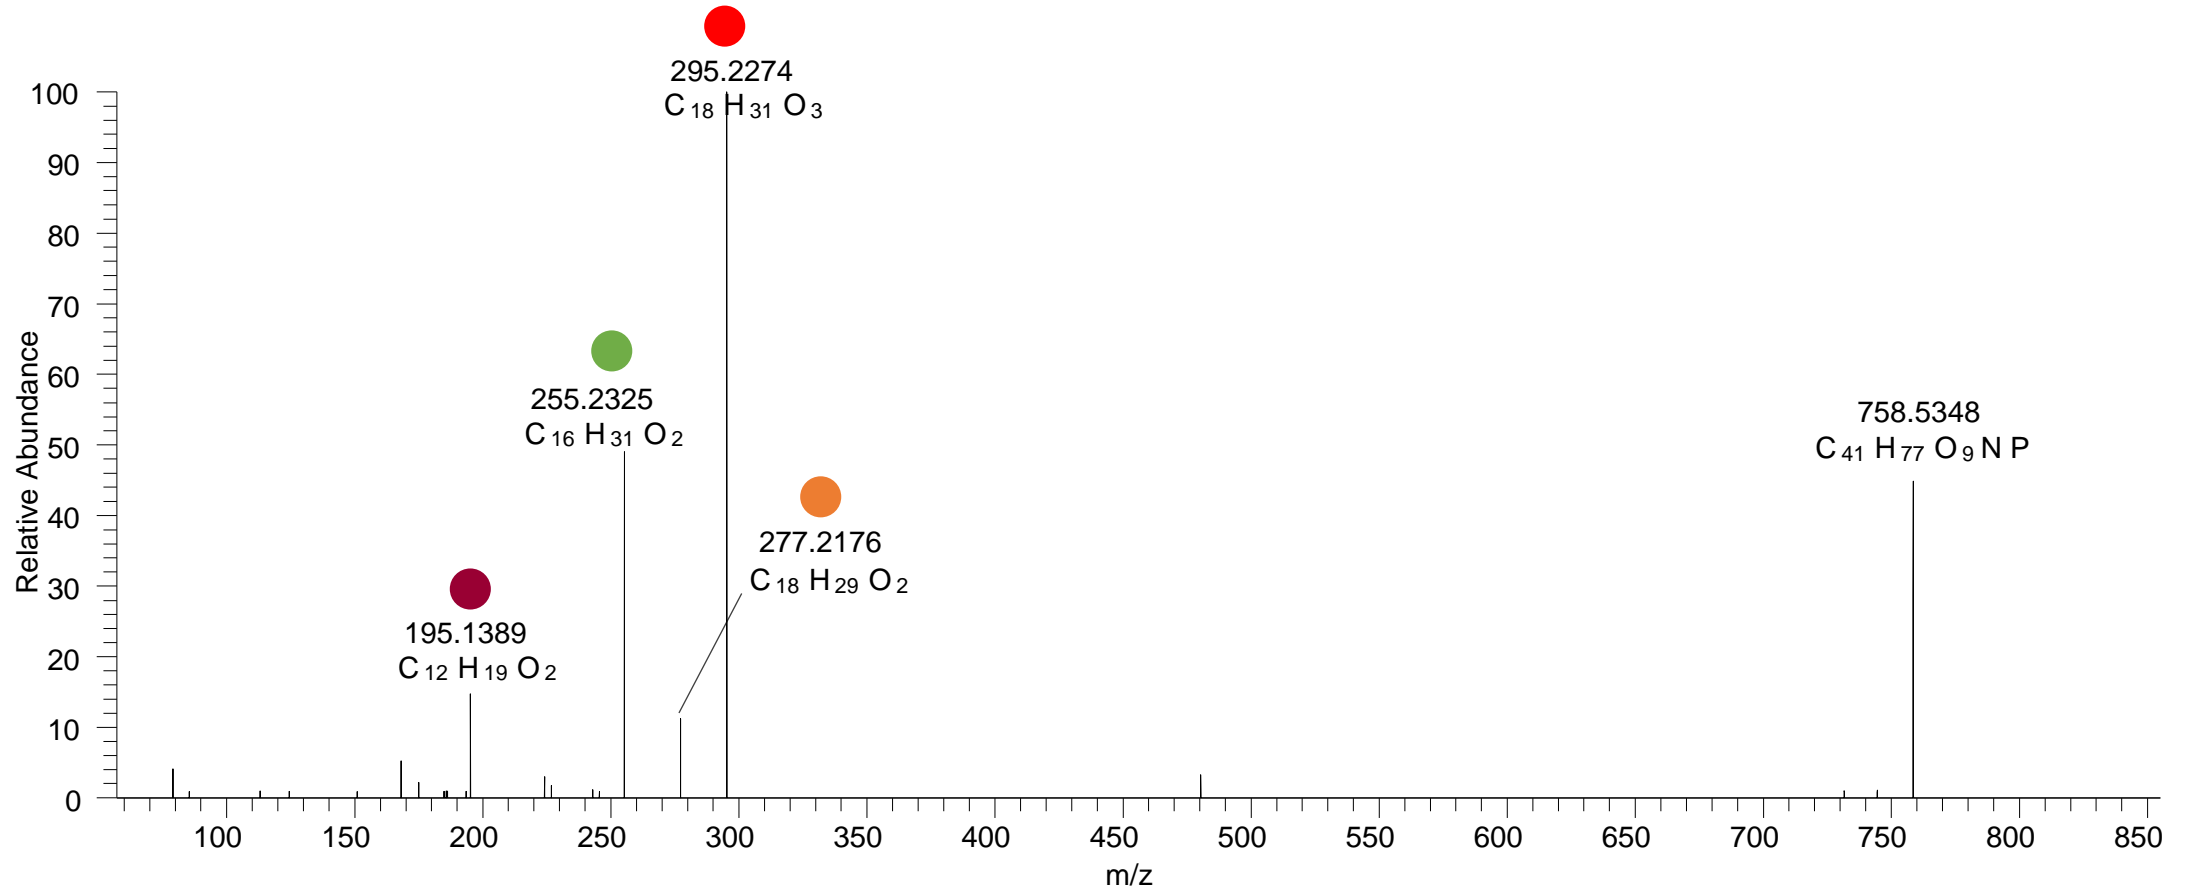

# PC(16:0\_18:2<OH{9}>)

[oxPC+HCOO]- XIC 818.5553 NL: 9.27E4

## RT 13.6

- Fragments containing oxFAs
- Fragments related to water loss
- Fragments not containing oxFAs
- Fragments containing methylated oxFAs
- Fragments related to CO<sub>2</sub> loss
- Position-specific fragments

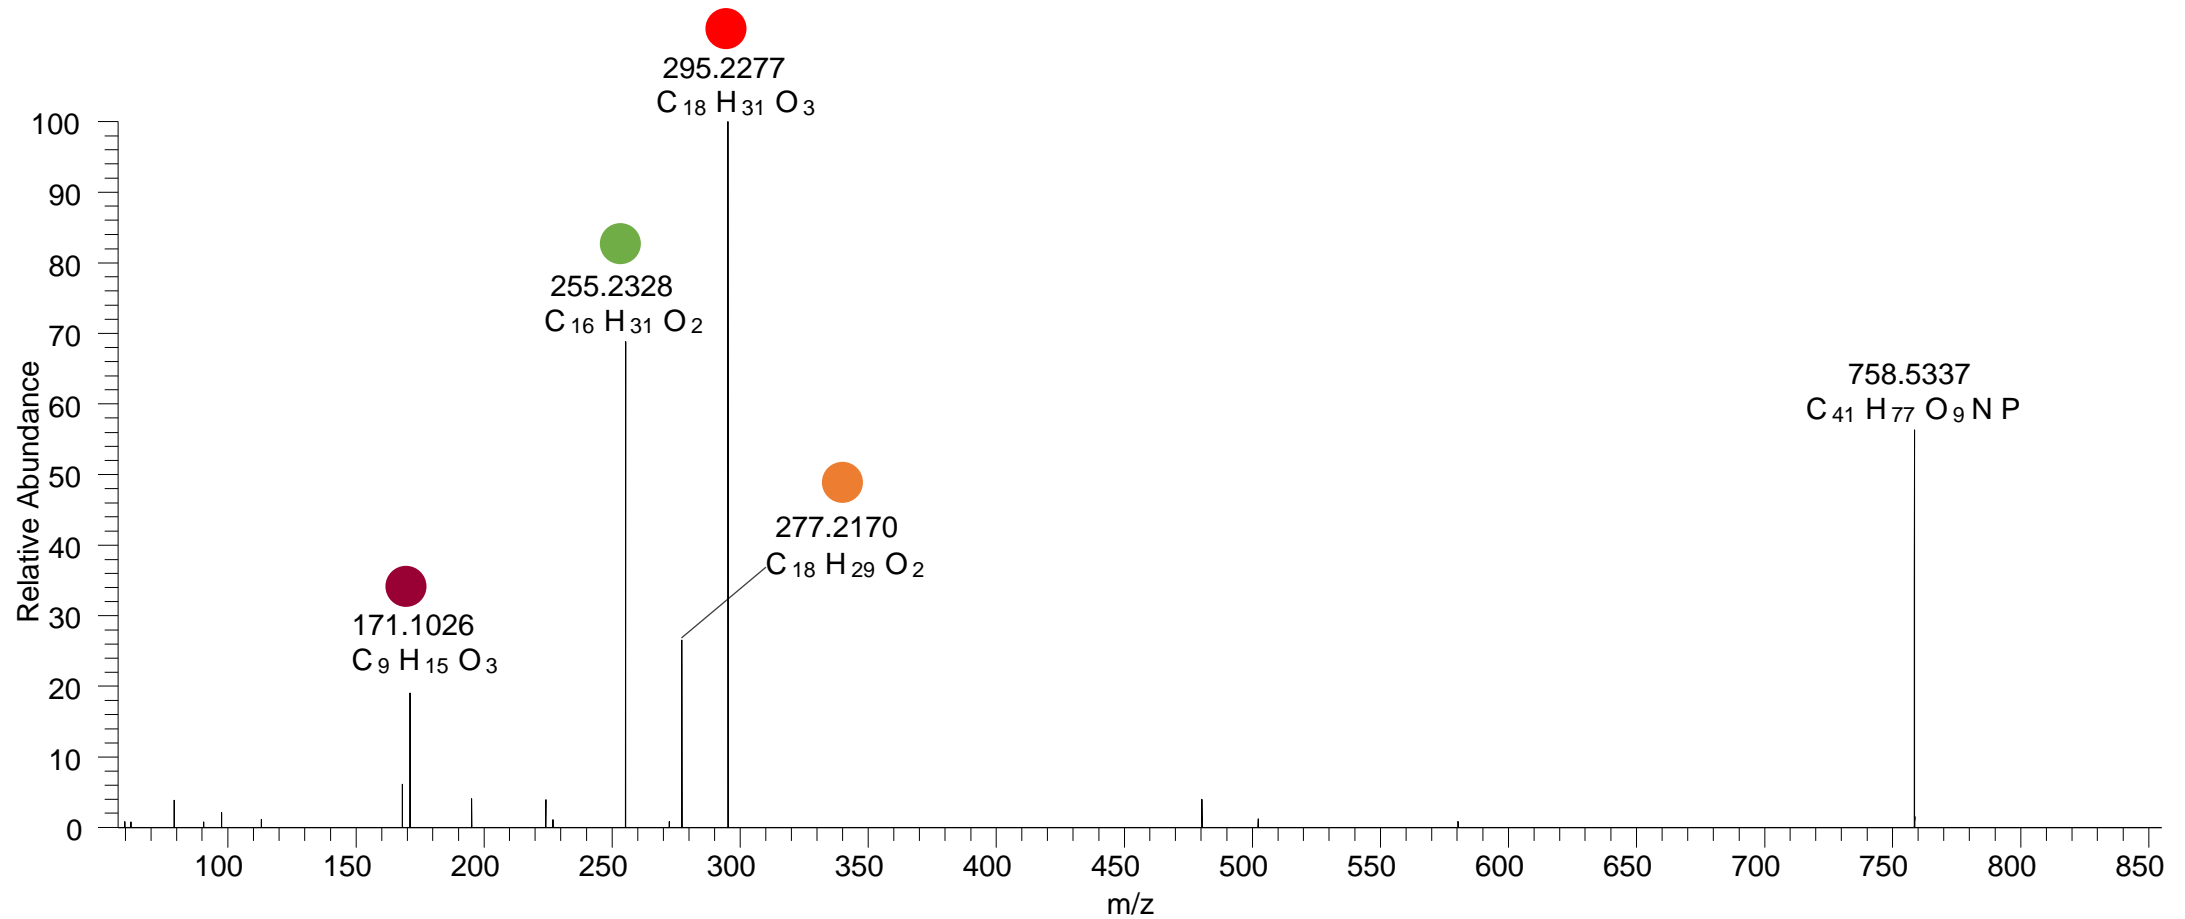

# PC(16:0<O>\_18:2)

[oxPC+HCOO]<sup>-</sup> XIC 818.5553 NL: 6.25E4

## RT 15.7

- Fragments containing oxFAs
- Fragments related to water loss
- Fragments not containing oxFAs
- Fragments containing methylated oxFAs
- Fragments related to CO<sub>2</sub> loss
- Position-specific fragments

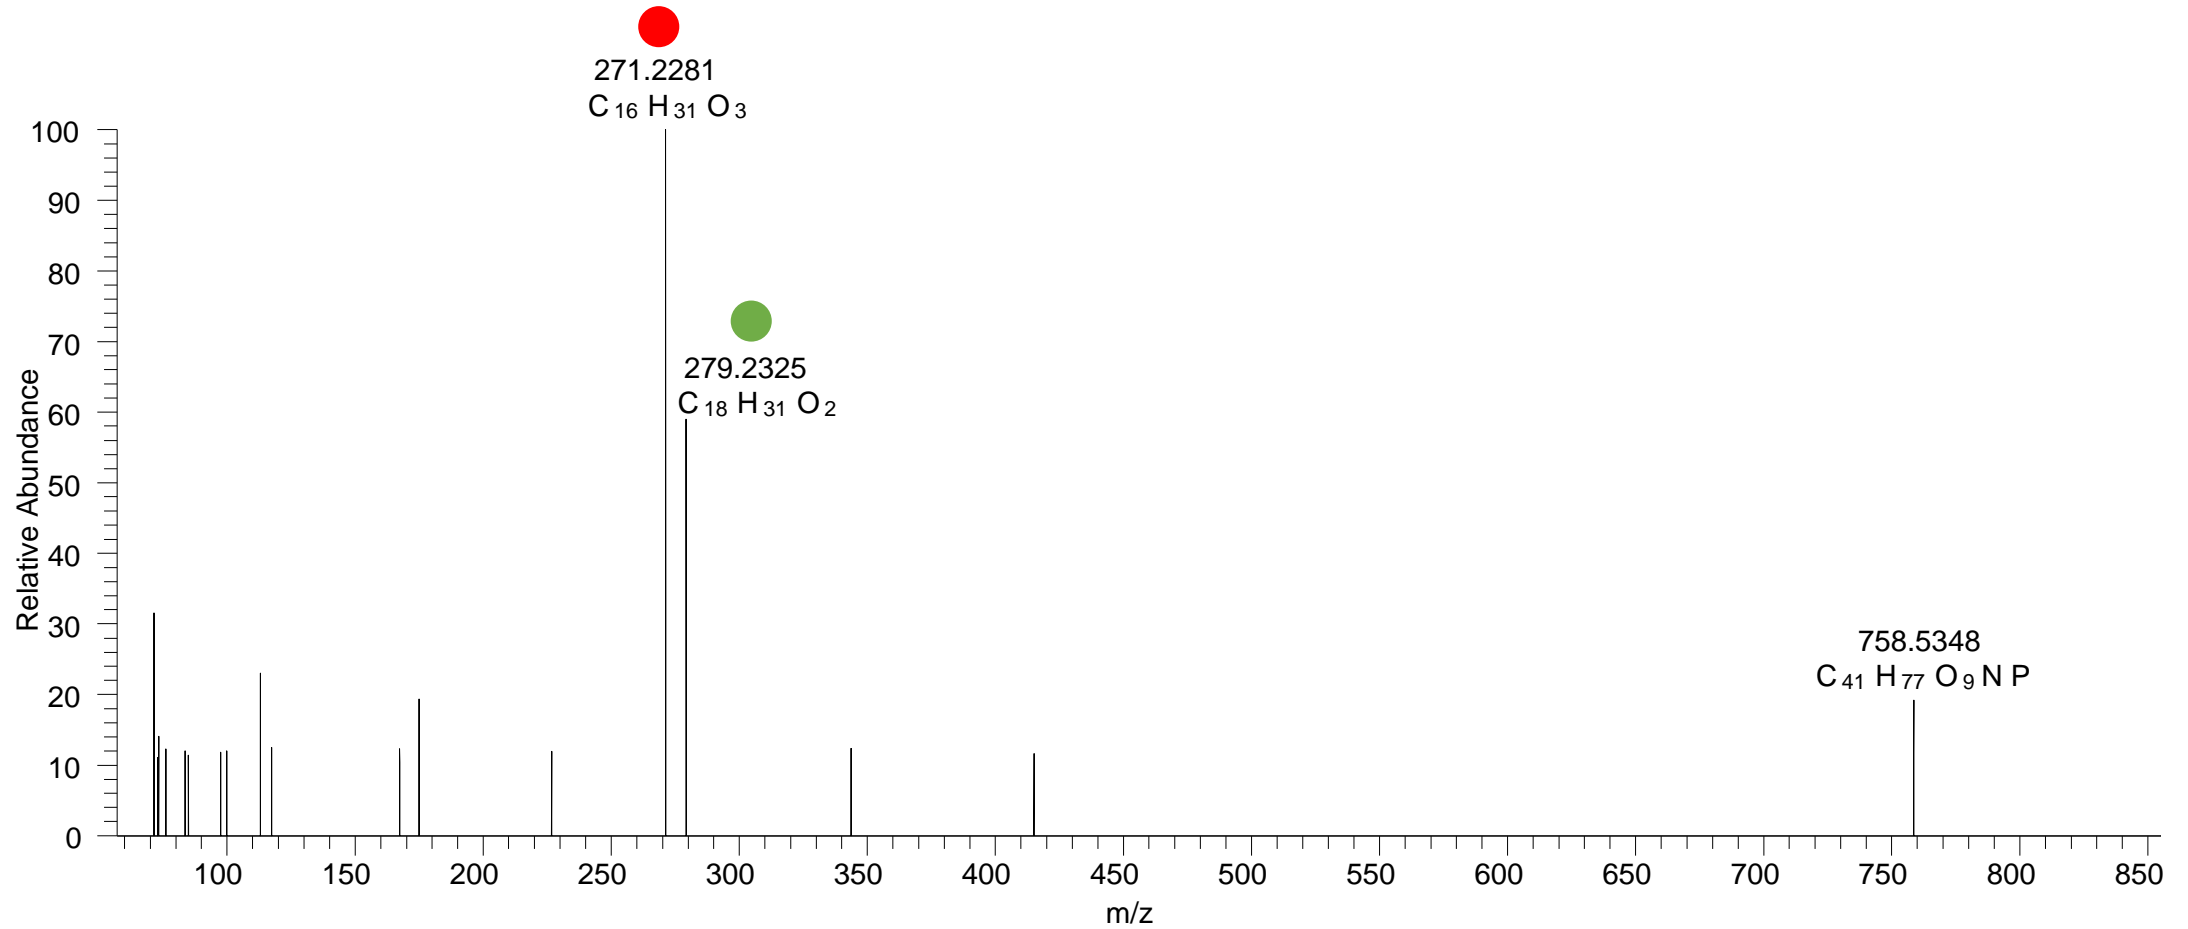



# PC(16:0\_18:1<O>)

[oxPC+HCOO]<sup>-</sup> XIC 820.5709 NL: 6.89E3

## RT 14.2

- Fragments containing oxFAs
- Fragments related to water loss
- Fragments not containing oxFAs
- Fragments containing methylated oxFAs
- Fragments related to CO<sub>2</sub> loss
- Position-specific fragments

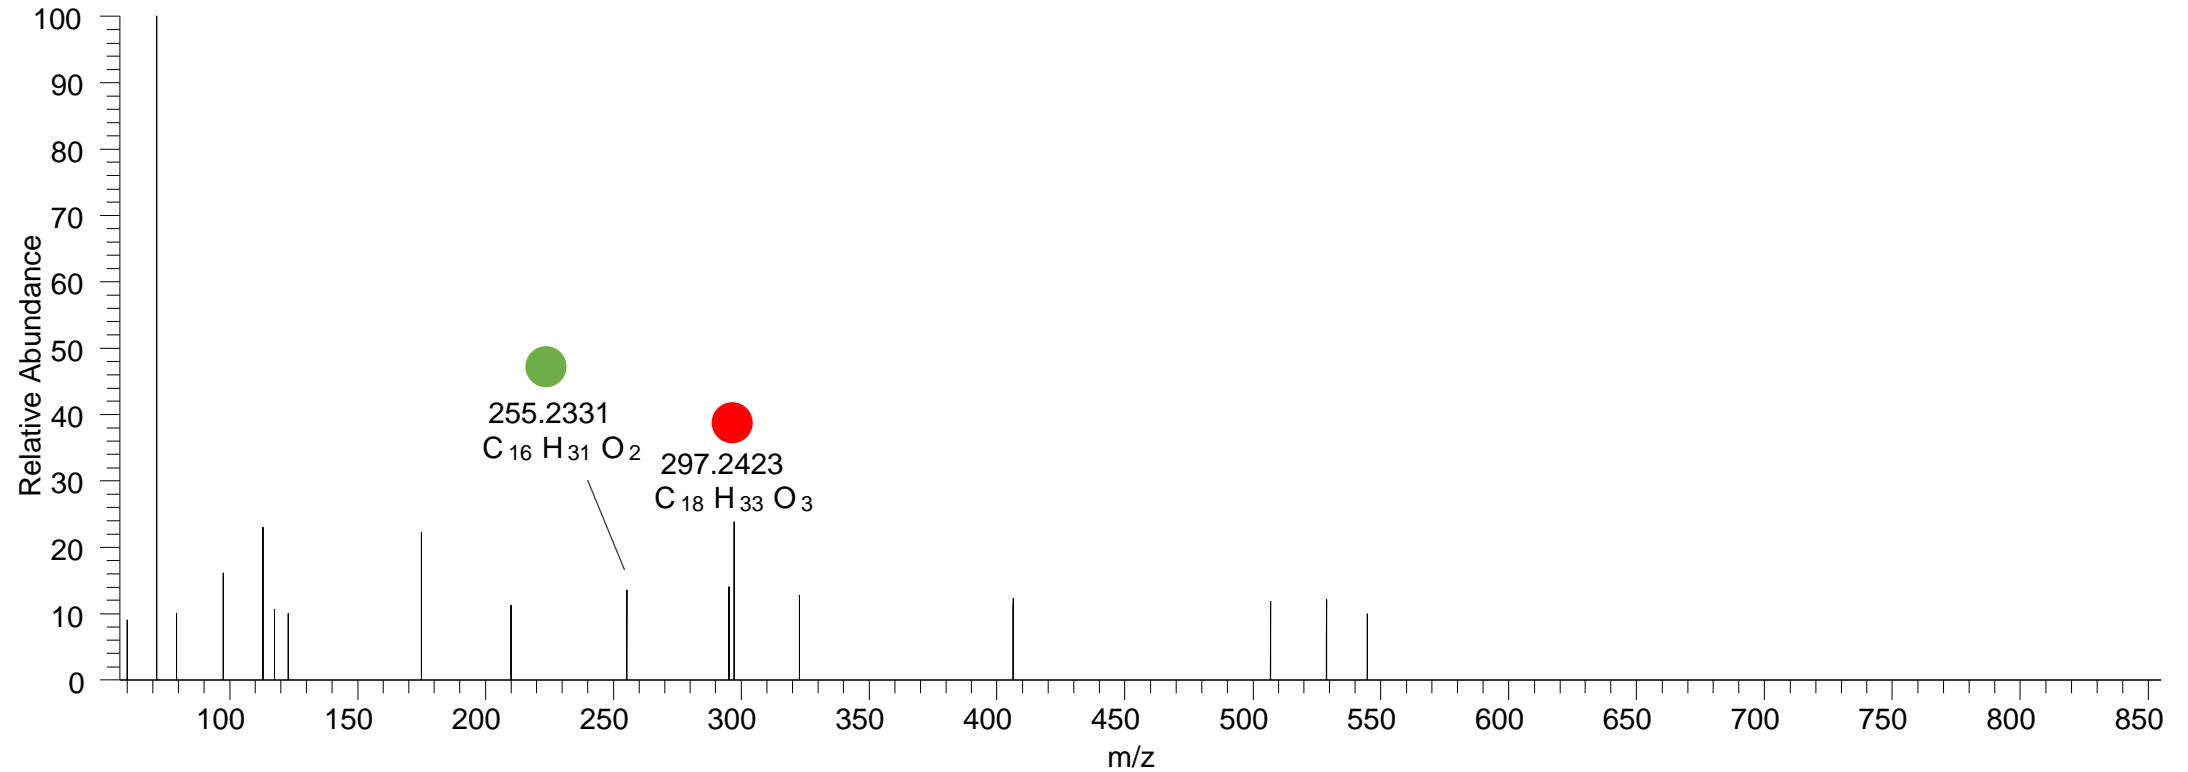

# PC(16:0<O>\_18:1)

[oxPC+HCOO]<sup>-</sup> XIC 820.5709 NL: 5.36E3

## RT 16.8-17.1

- Fragments containing oxFAs
- Fragments related to water loss
- Fragments not containing oxFAs
- Fragments containing methylated oxFAs
- Fragments related to CO<sub>2</sub> loss
- Position-specific fragments

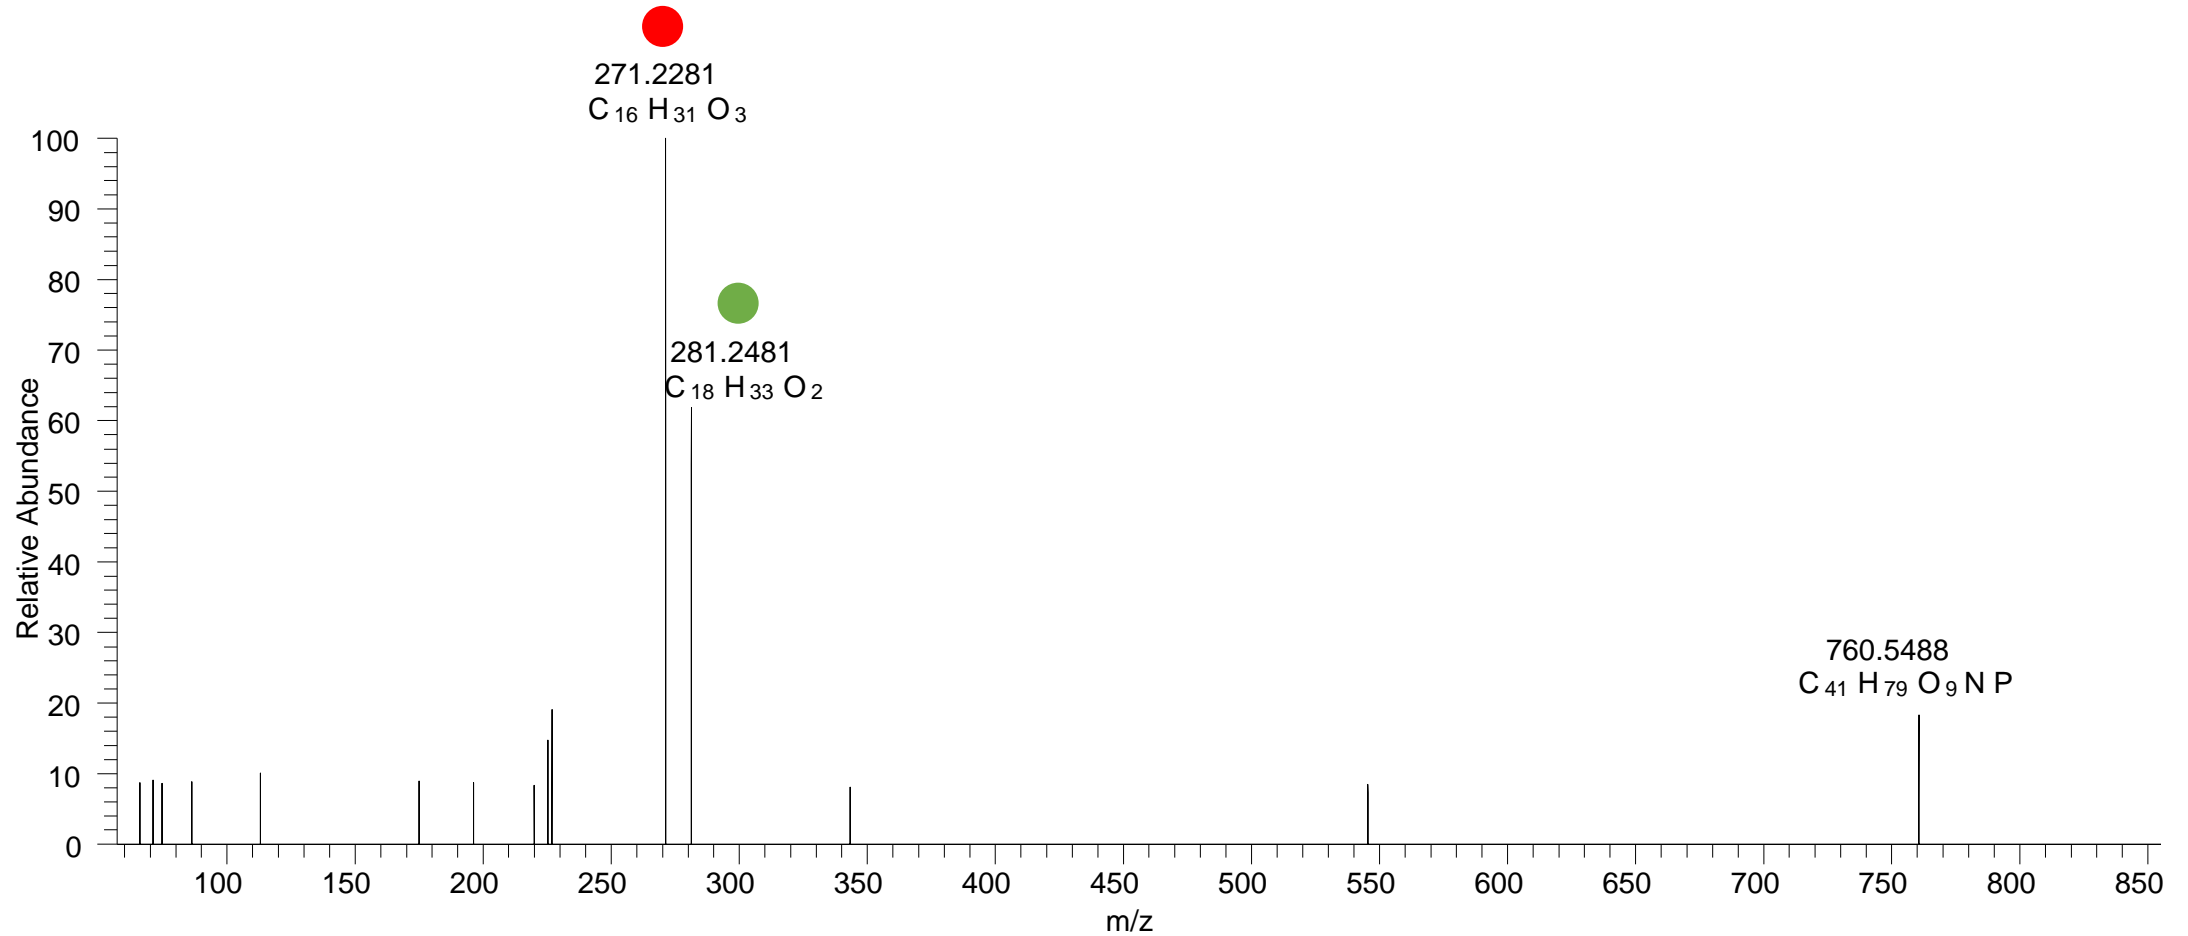

# PC(16:0\_18:2<OH,O{9}>)

[oxPC+HCOO]<sup>-</sup> XIC 834.5502 NL: 3.30E3

## RT 11.6

- Fragments containing oxFAs
- Fragments related to water loss
- Fragments not containing oxFAs
- Fragments containing methylated oxFAs
- Fragments related to CO<sub>2</sub> loss
- Position-specific fragments

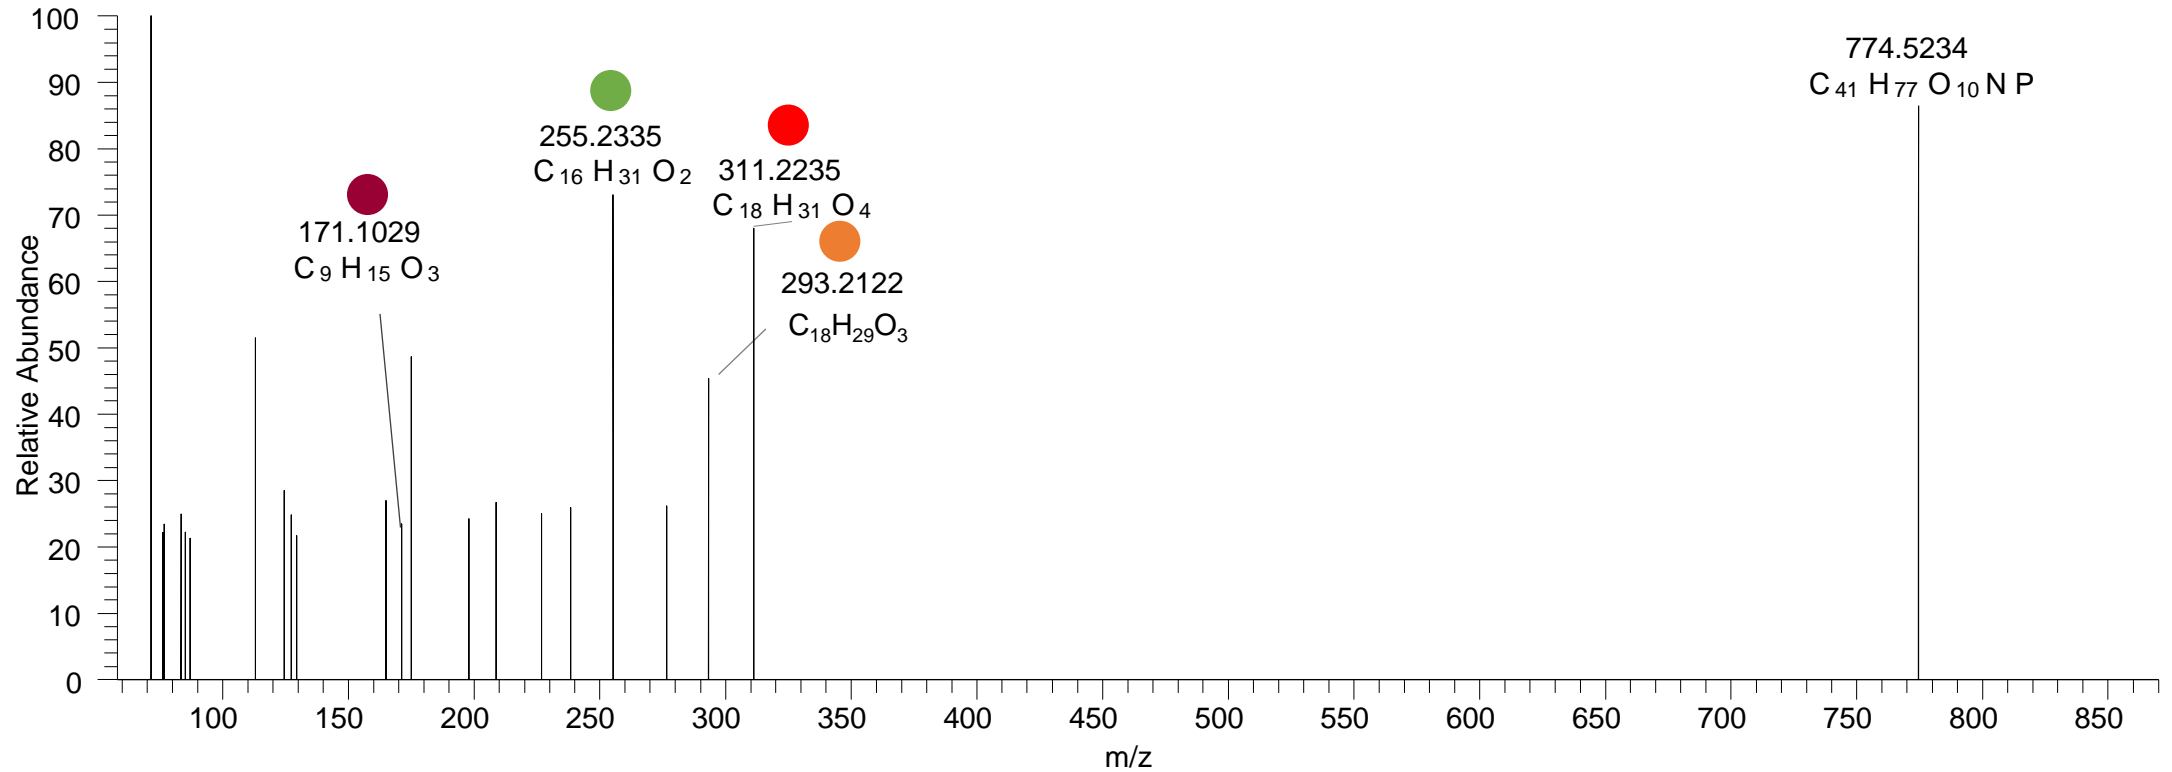

# PC(16:0\_18:2<OOH>)

[oxPC+HCOO]<sup>-</sup> XIC 834.5502 NL: 4.70E3

## RT 12.8

- Fragments containing oxFAs
- Fragments related to water loss
- Fragments not containing oxFAs
- Fragments containing methylated oxFAs
- Fragments related to CO<sub>2</sub> loss
- Position-specific fragments

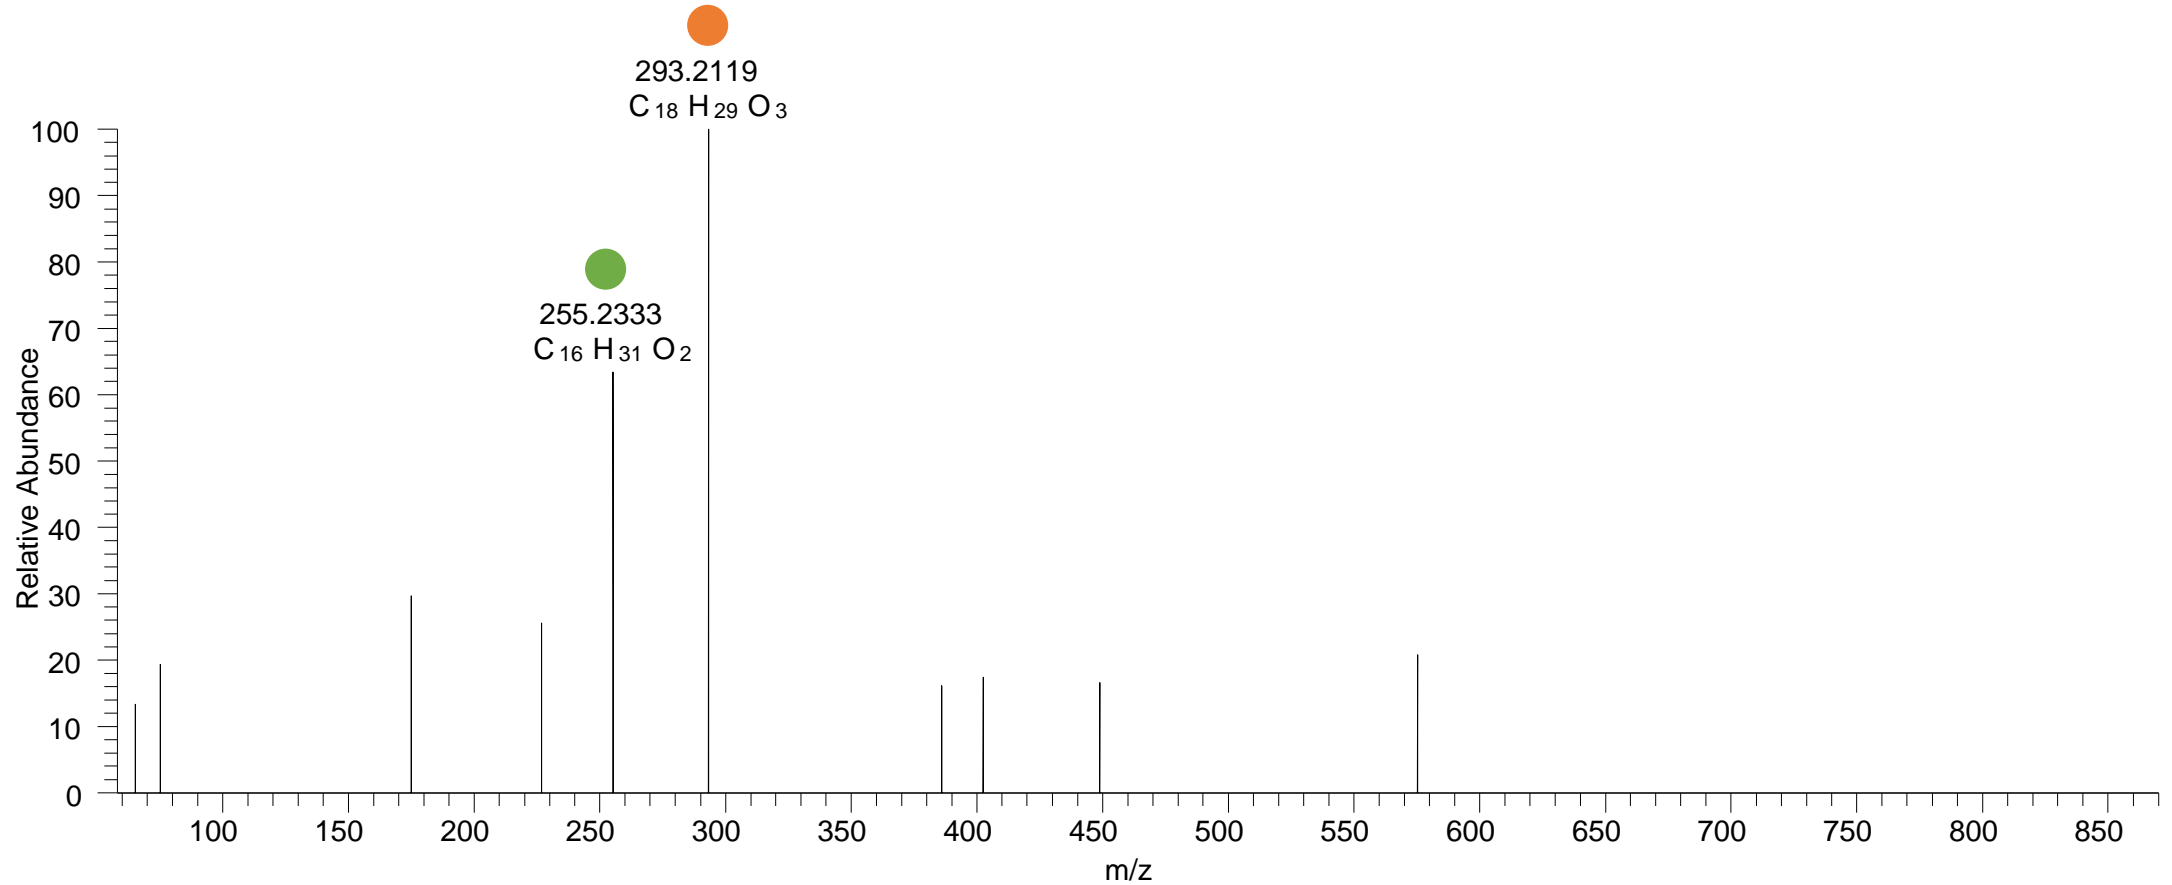

# PC(16:0\_18:2<OOH{13}>)

[oxPC+HCOO]<sup>-</sup> XIC 834.5502 NL: 2.69E4

## RT 13.1-13.4

- Fragments containing oxFAs
- Fragments related to water loss
- Fragments not containing oxFAs
- Fragments containing methylated oxFAs
- Fragments related to CO<sub>2</sub> loss
- Position-specific fragments

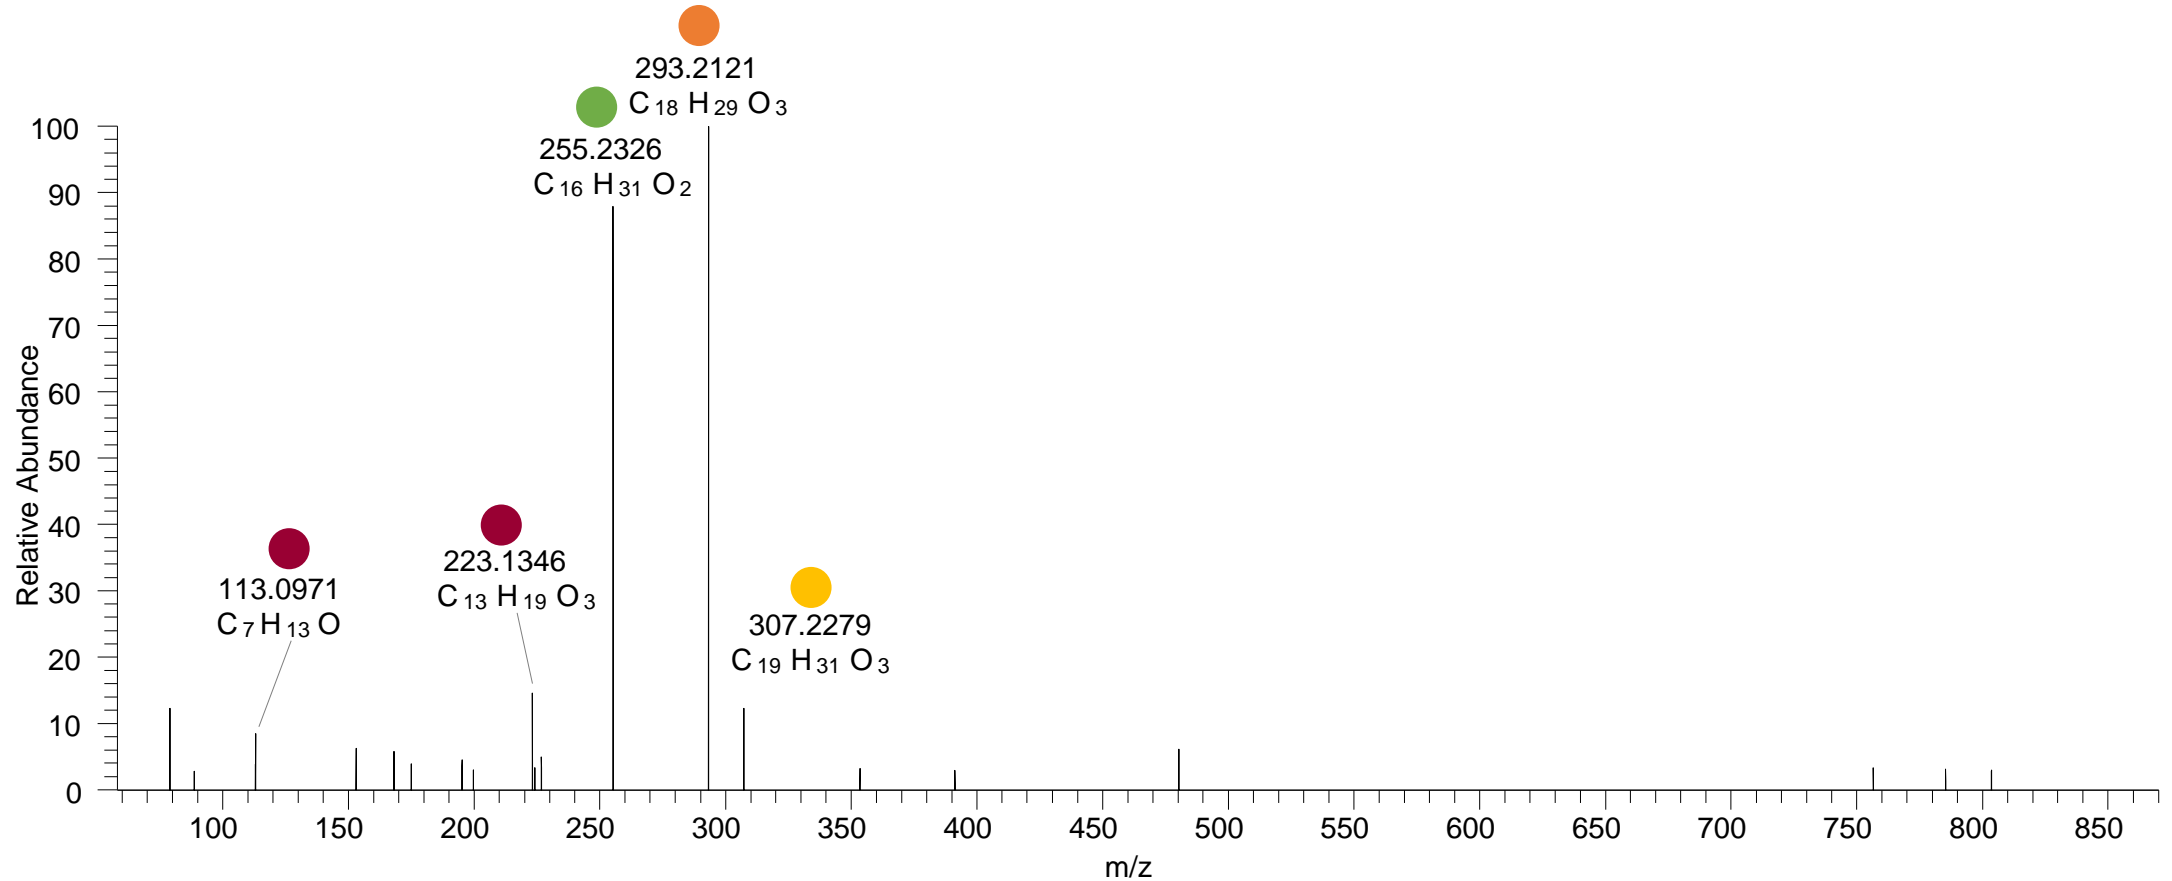

# PC(16:0\_18:2<OOH{9}>)

[oxPC+HCOO]<sup>-</sup> XIC 834.5502 NL: 1.93E4

## RT 13.6

- Fragments containing oxFAs
- Fragments related to water loss
- Fragments not containing oxFAs
- Fragments containing methylated oxFAs
- Fragments related to CO<sub>2</sub> loss
- Position-specific fragments

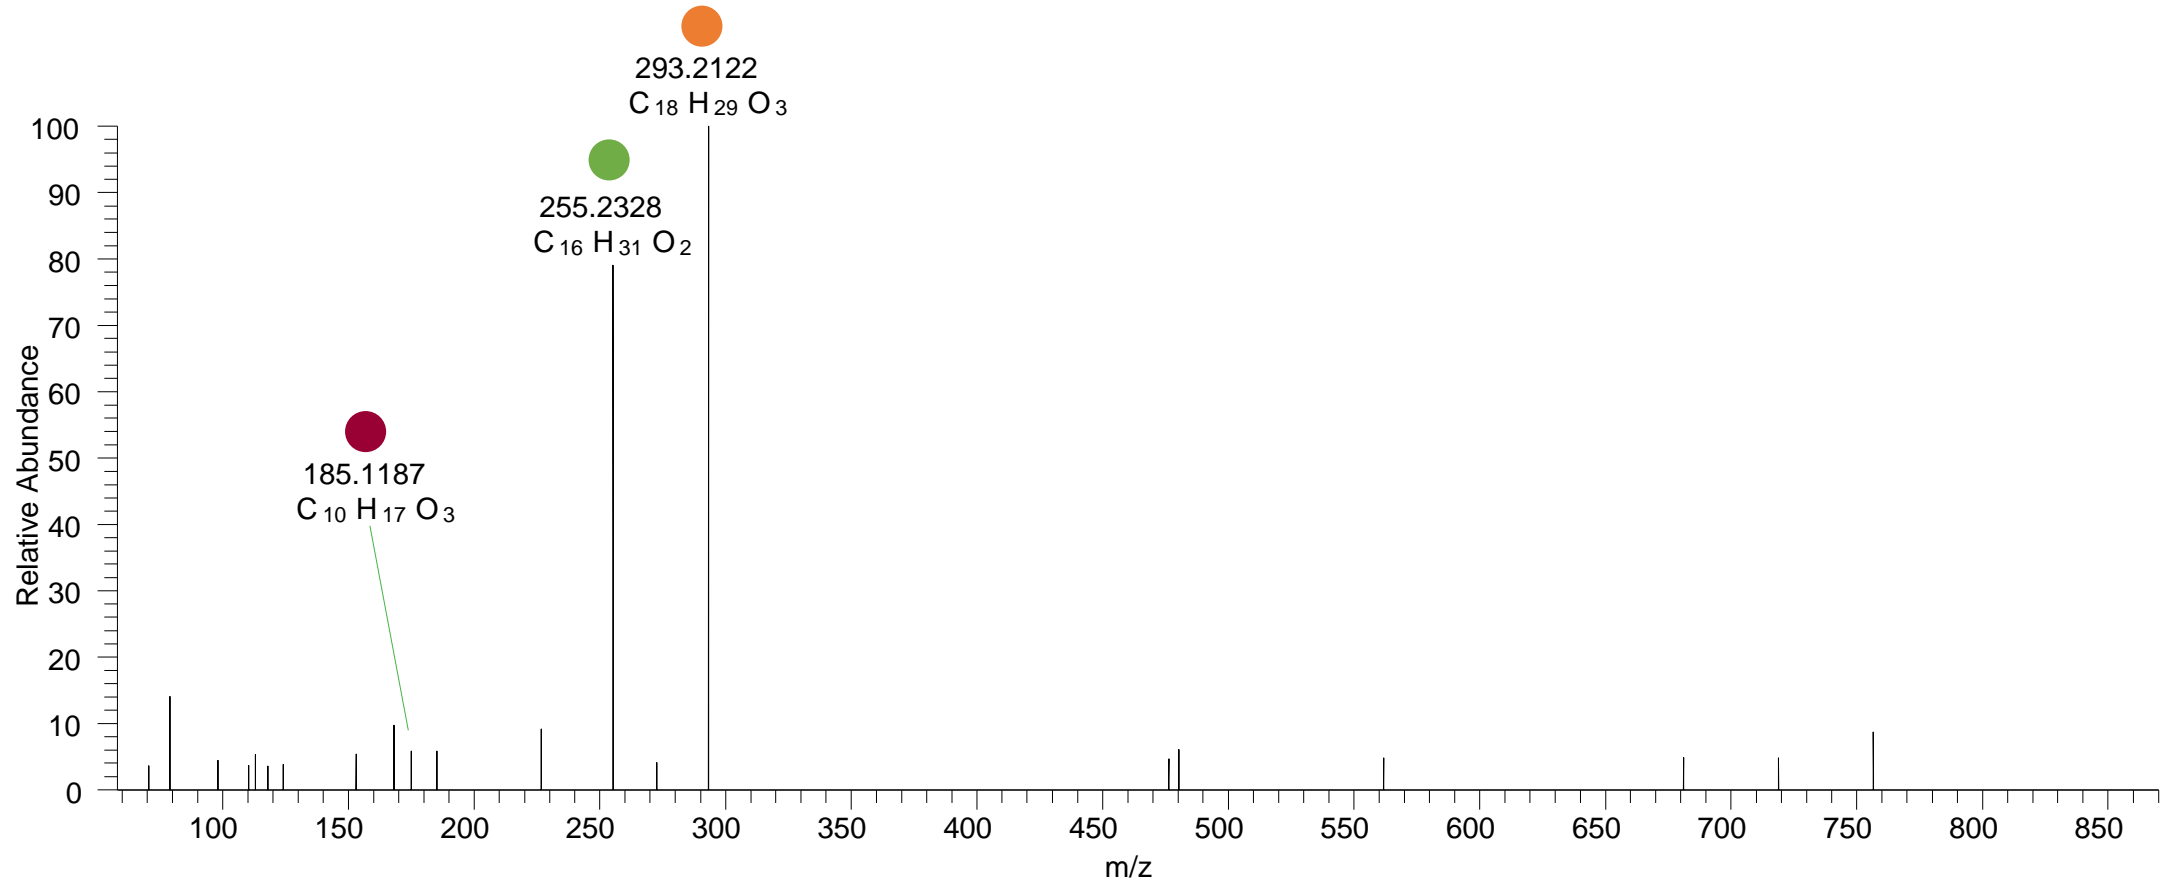

# PC(16:0\_18:1<OOH>)

[oxPC+HCOO]<sup>-</sup> XIC 836.5658 NL: 5.31E3

## RT 14.3

- Fragments containing oxFAs
- Fragments related to water loss
- Fragments not containing oxFAs
- Fragments containing methylated oxFAs
- Fragments related to CO<sub>2</sub> loss
- Position-specific fragments

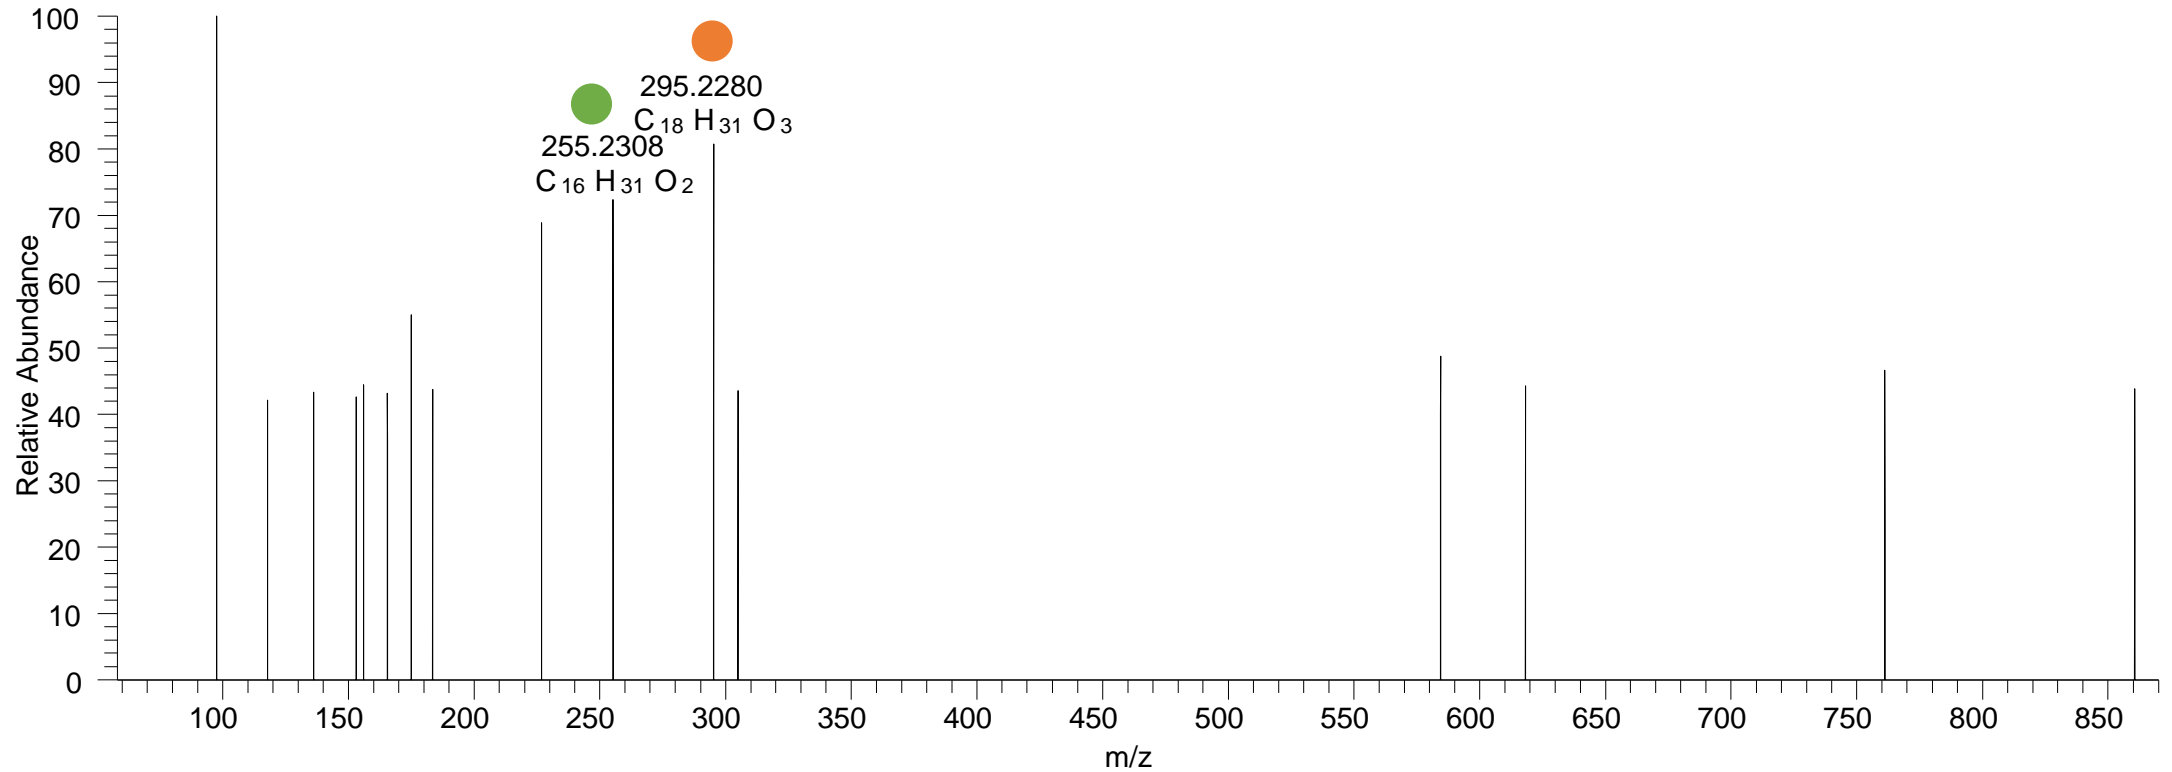

# PC(16:0\_20:5<O>)

[oxPC+HCOO]<sup>-</sup> XIC 840.5396 NL: 2.93E3

## RT 12.6-13.0

- Fragments containing oxFAs
- Fragments related to water loss
- Fragments not containing oxFAs
- Fragments containing methylated oxFAs
- Fragments related to CO<sub>2</sub> loss
- Position-specific fragments

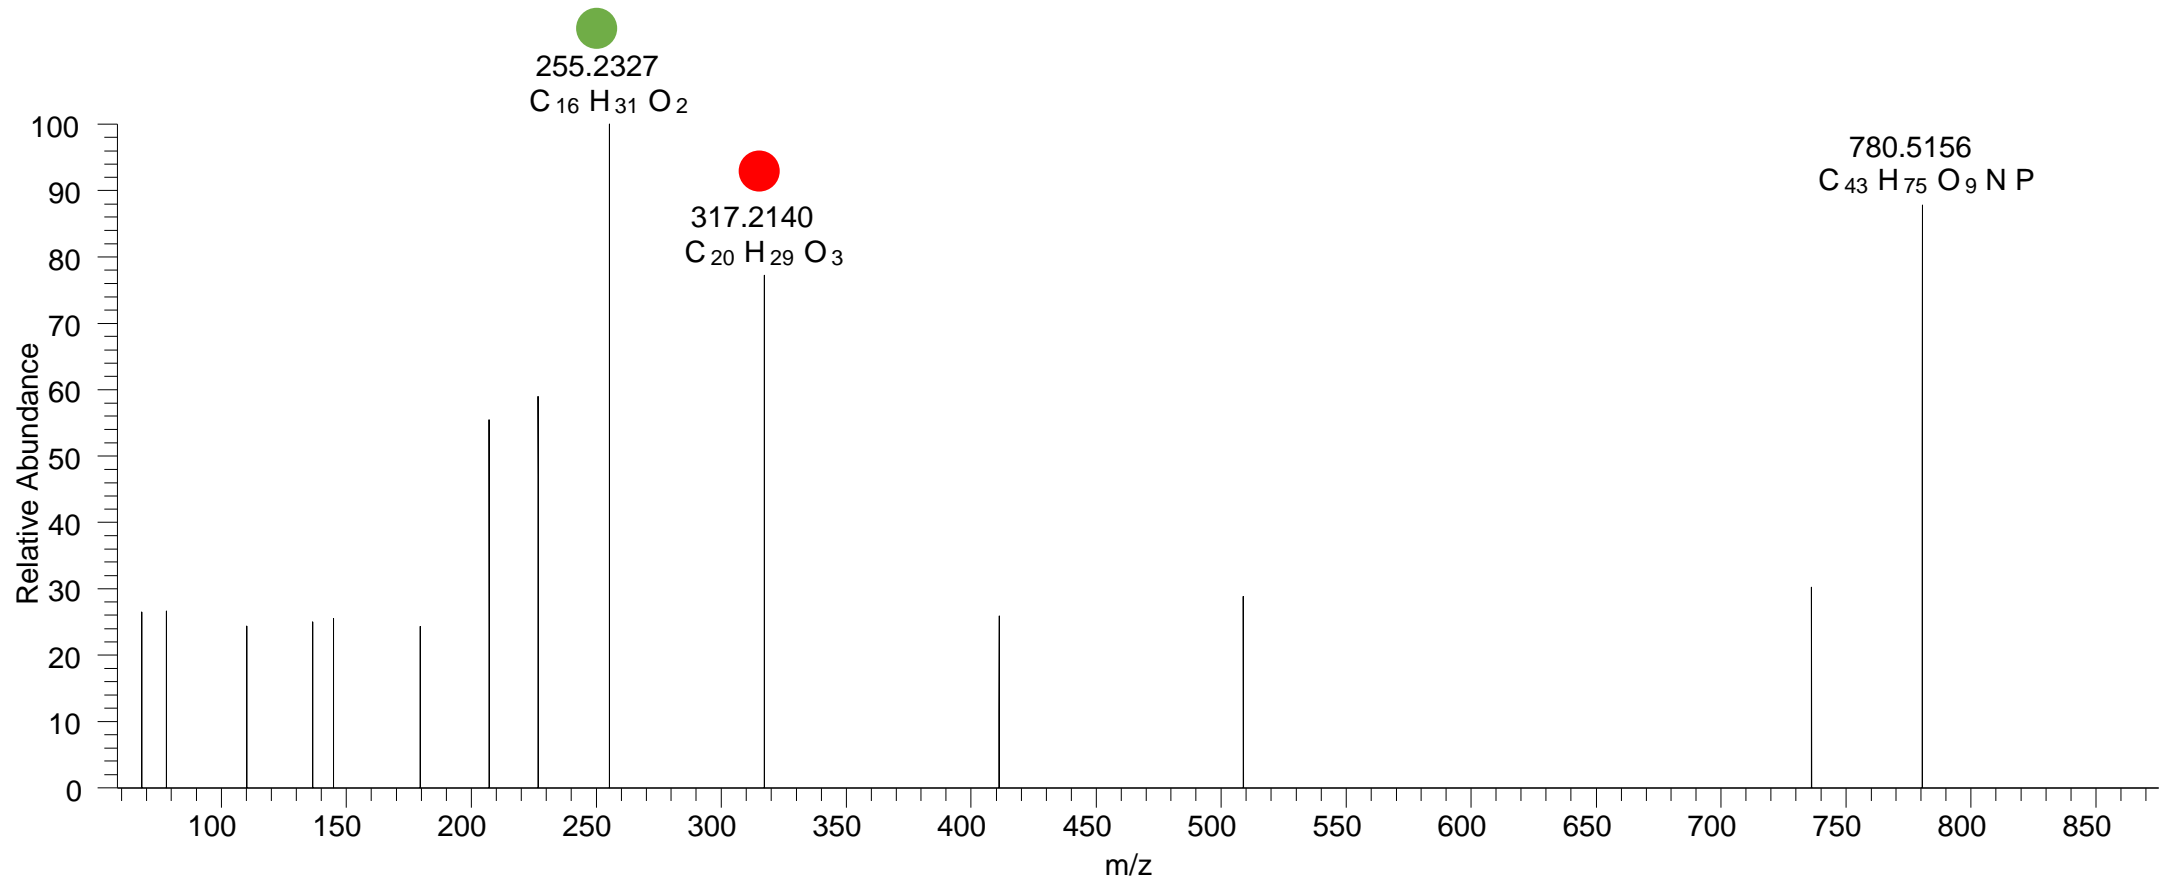



# PC(18:2\_18:2<OH>)

[oxPC+HCOO]<sup>-</sup> XIC 842.5553 NL: 2.80E3

## RT 12.5

- Fragments containing oxFAs
- Fragments related to water loss
- Fragments not containing oxFAs
- Fragments containing methylated oxFAs
- Fragments related to CO<sub>2</sub> loss
- Position-specific fragments

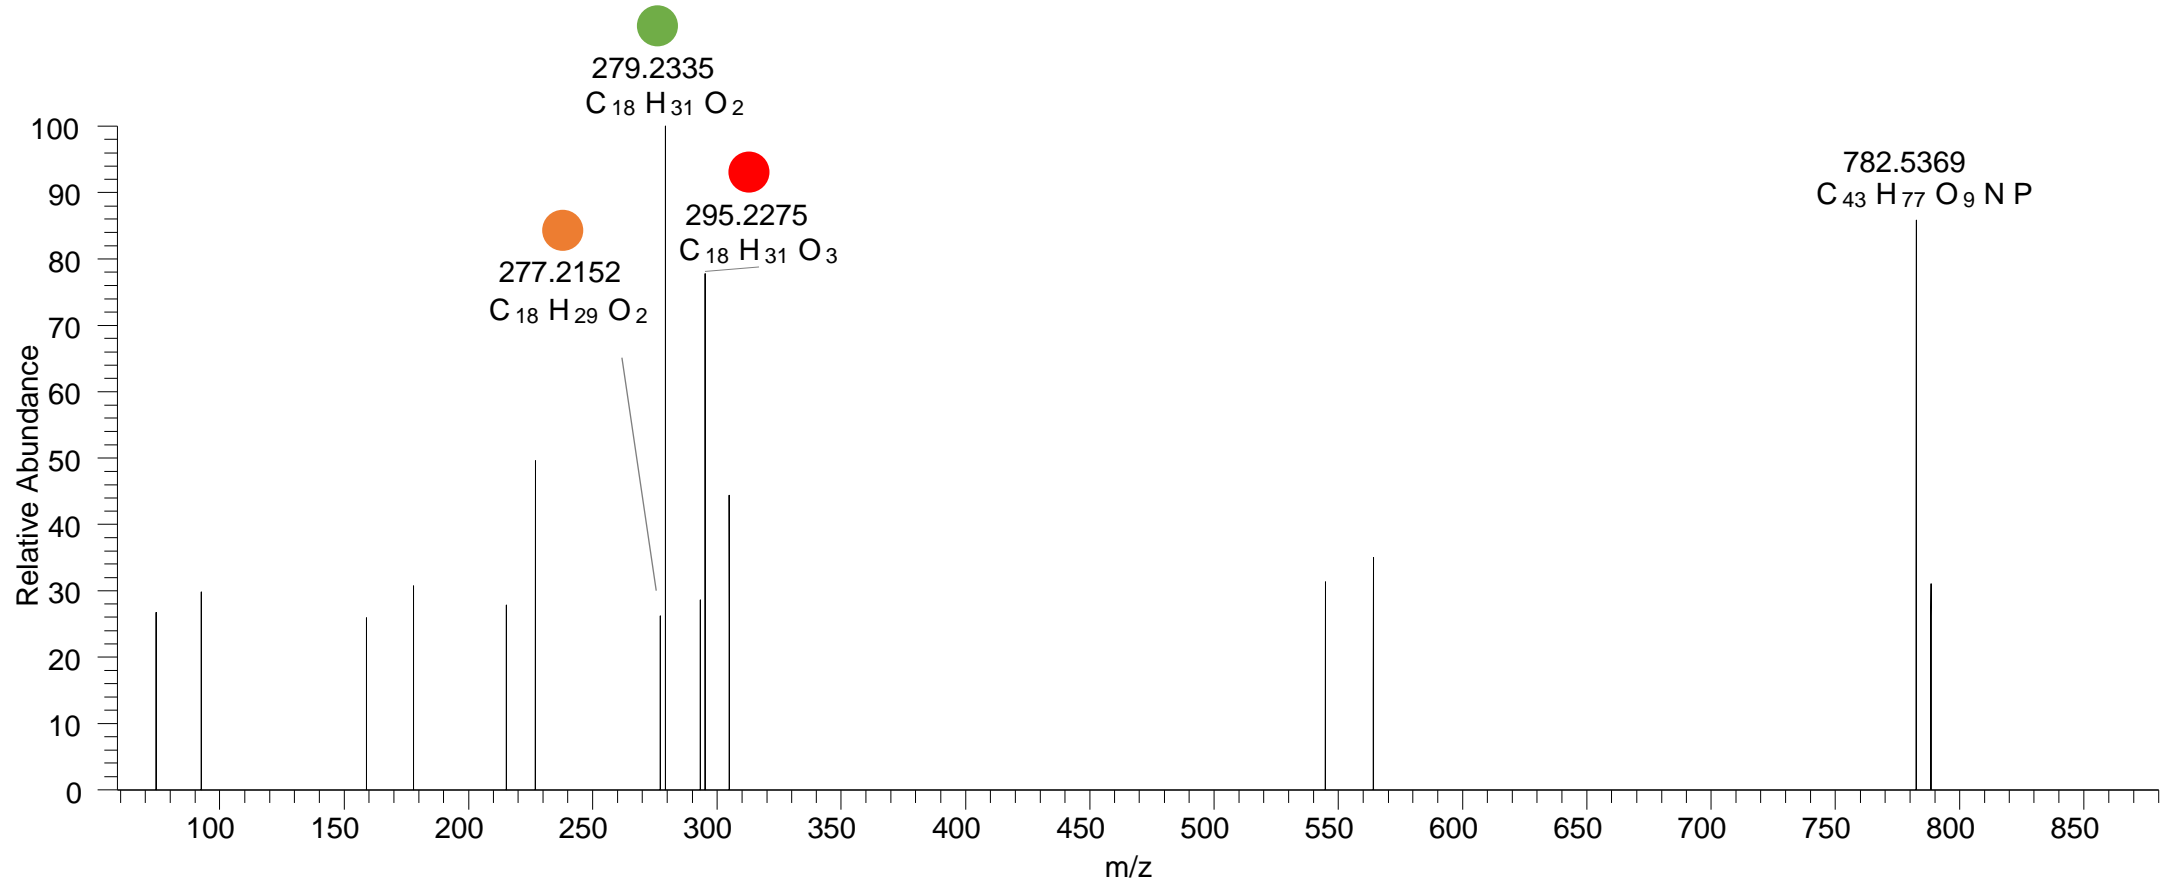

# PC(16:0\_20:4<OH{13}>)

[oxPC+HCOO]<sup>-</sup> XIC 842.5553 NL: 5.46E3

## RT 13.2

- Fragments containing oxFAs
- Fragments related to water loss
- Fragments not containing oxFAs
- Fragments containing methylated oxFAs
- Fragments related to CO<sub>2</sub> loss
- Position-specific fragments

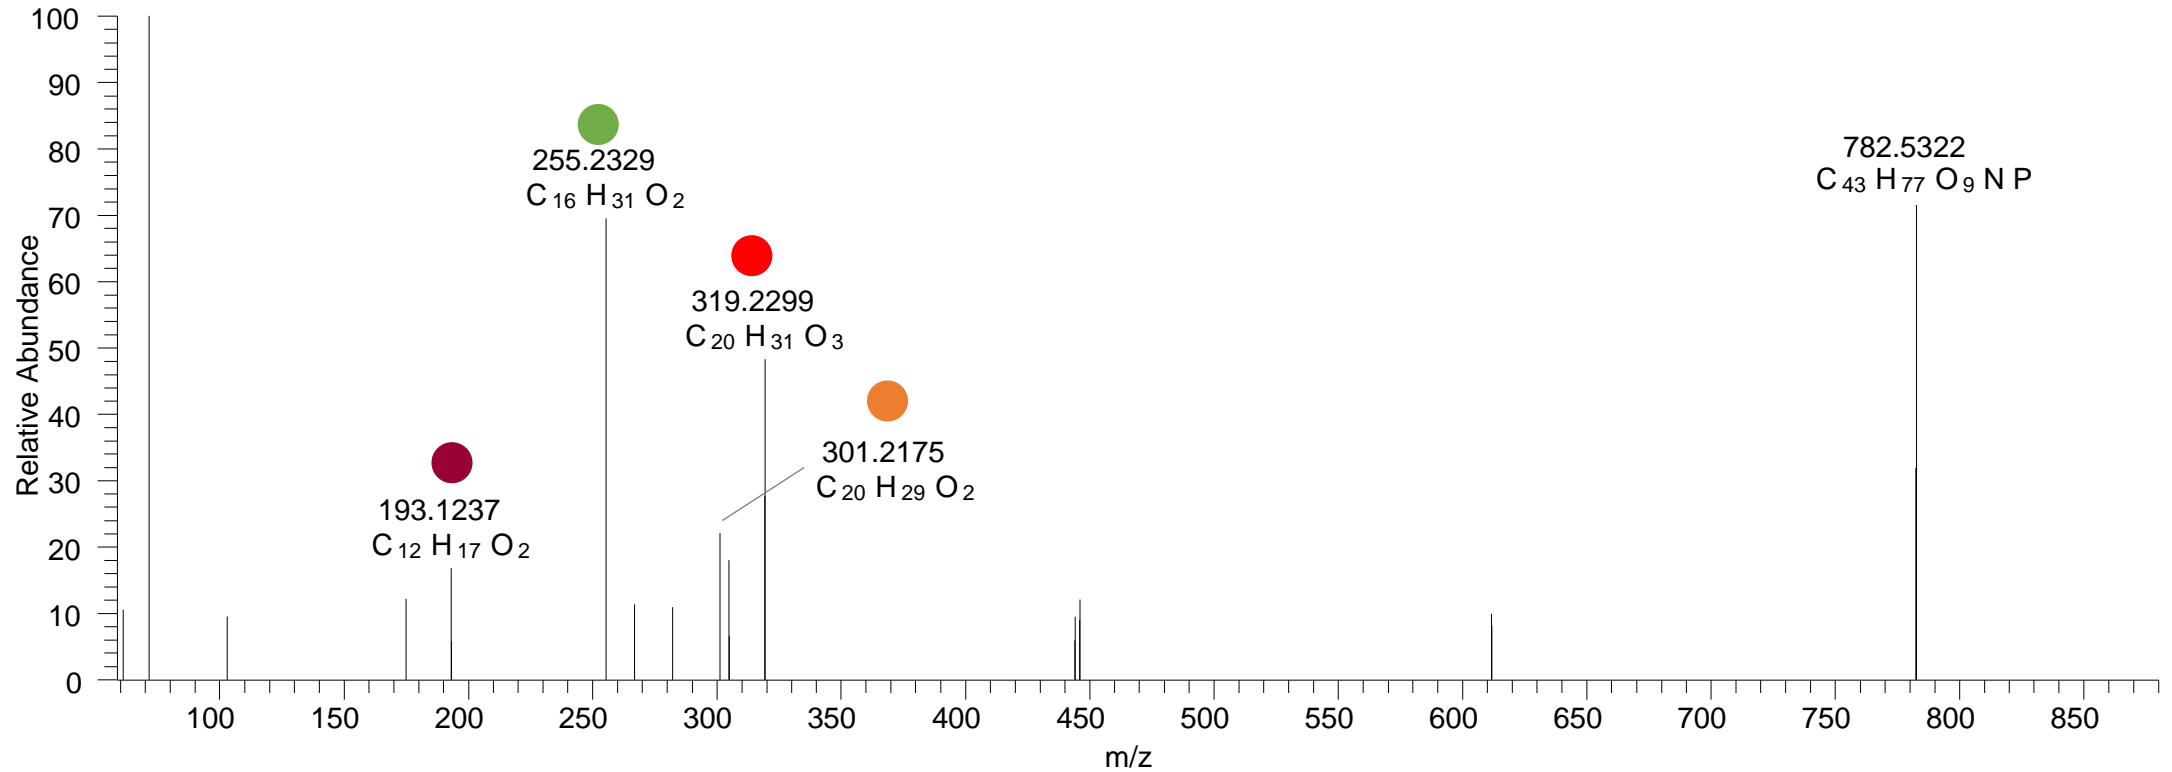

# PC(16:0\_20:4<OH{15}>)

[oxPC+HCOO]<sup>-</sup> XIC 842.5553 NL: 2.08E4

## RT 13.6

- Fragments containing oxFAs
- Fragments related to water loss
- Fragments not containing oxFAs
- Fragments containing methylated oxFAs
- Fragments related to CO<sub>2</sub> loss
- Position-specific fragments

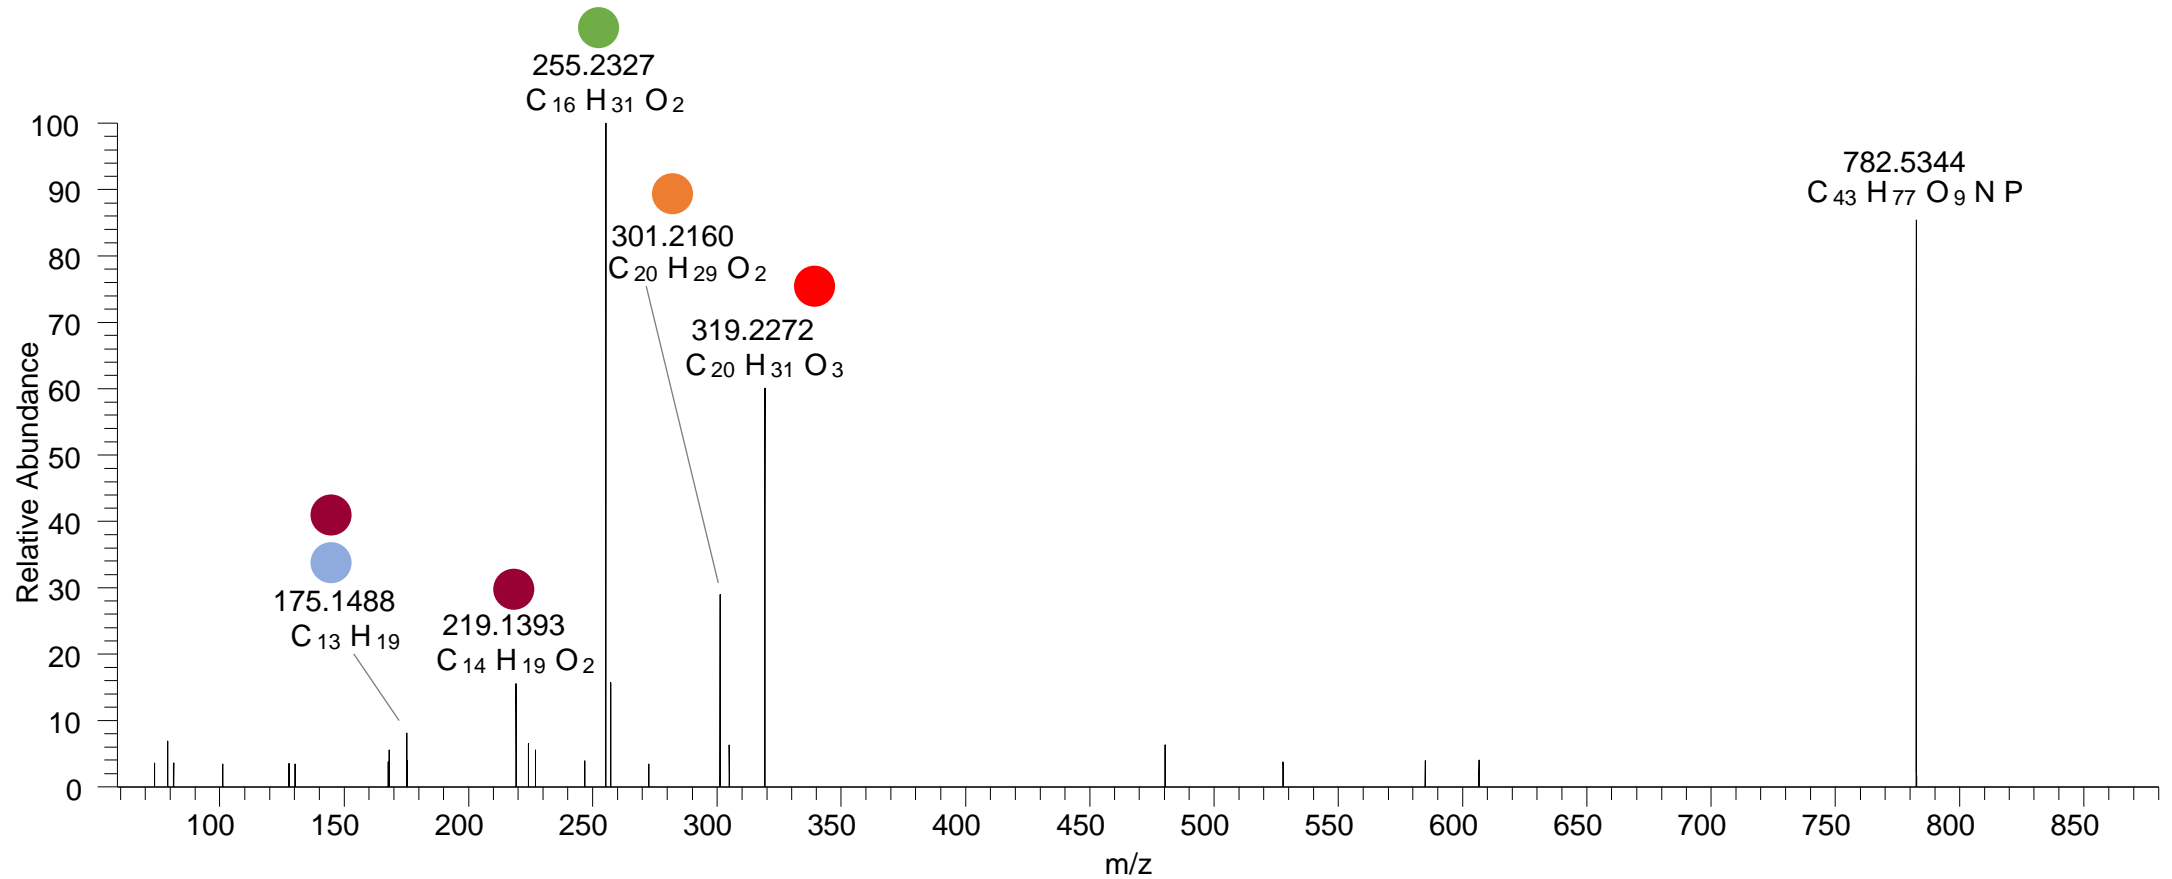

# PC(16:0\_20:4<OH{11}>) PC(16:0\_20:4<OH{12}>) RT 14.0

[oxPC+HCOO]<sup>-</sup> XIC 842.5553 NL: 2.87E4

- Fragments containing oxFAs
- Fragments related to water loss
- Fragments not containing oxFAs
- Fragments containing methylated oxFAs
- Fragments related to CO<sub>2</sub> loss
- Position-specific fragments

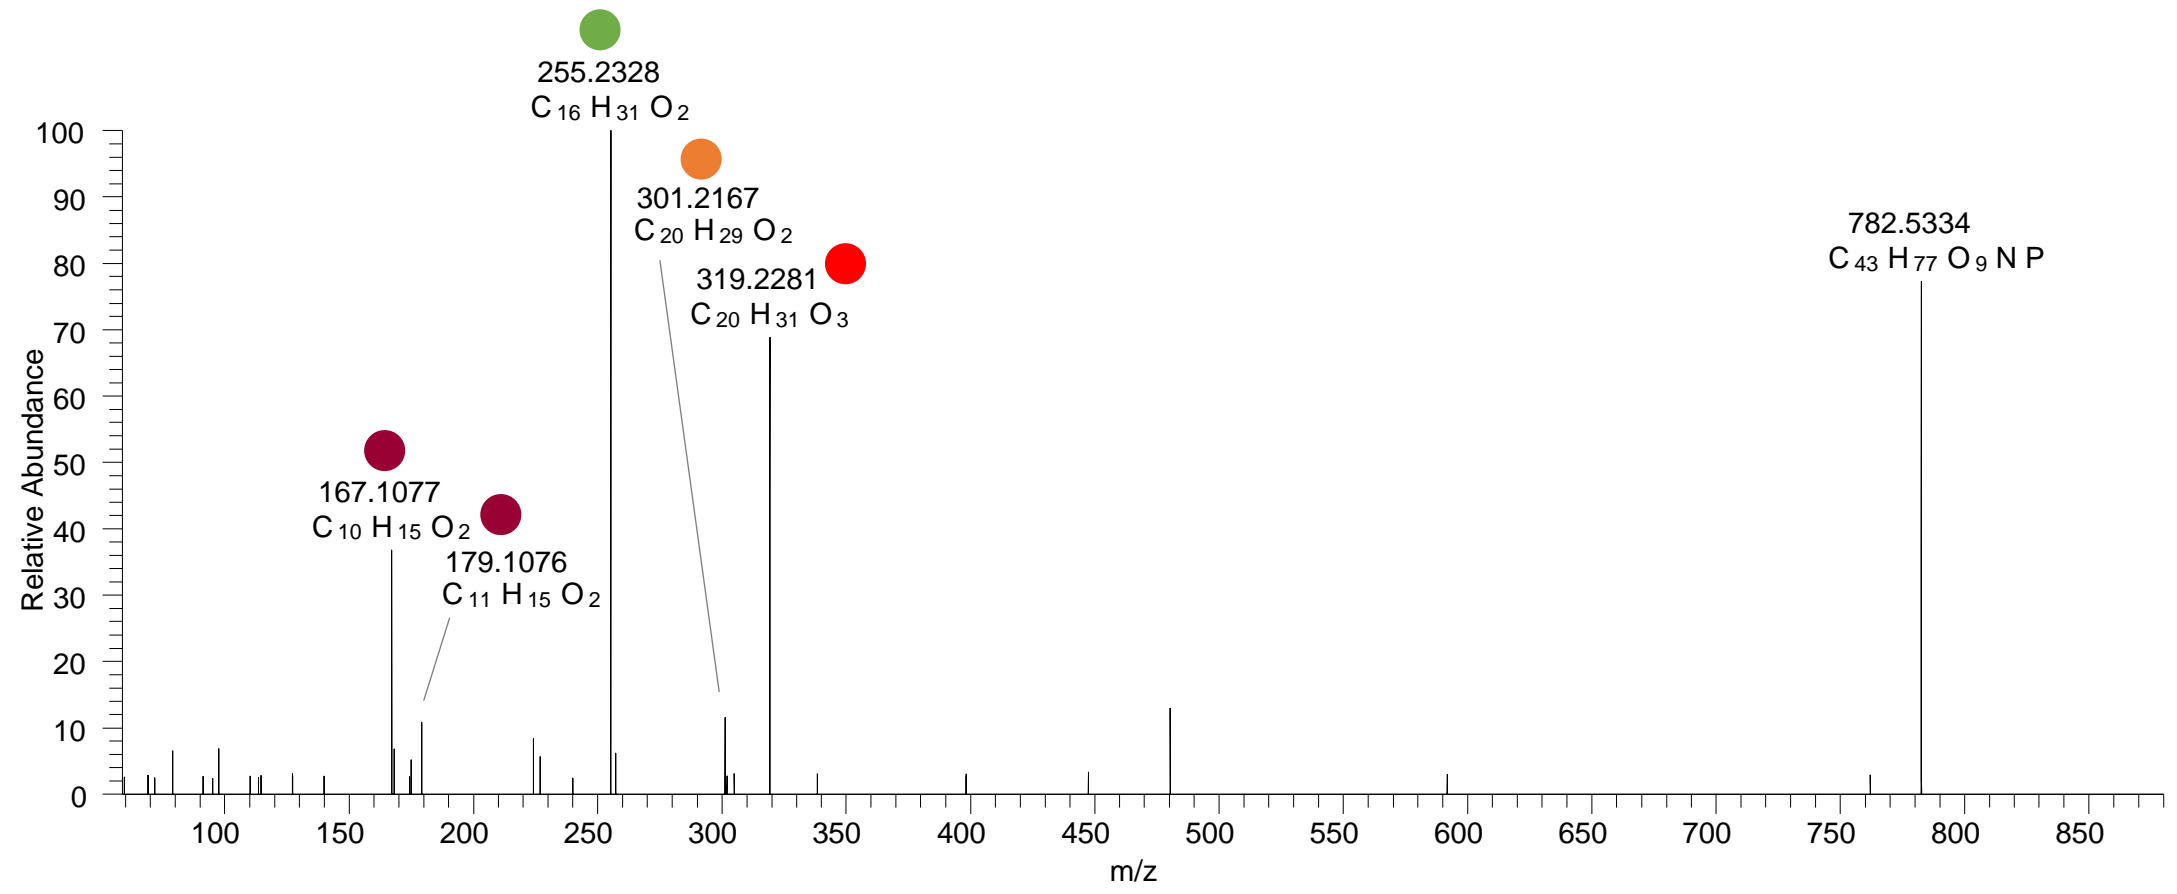

# PC(16:0\_20:4<OH{8}>) PC(16:0\_20:4<OH{9}>) RT 14.5

[oxPC+HCOO]<sup>-</sup> XIC 842.5553 NL: 3.17E4

- Fragments containing oxFAs
- Fragments related to water loss
- Fragments not containing oxFAs
- Fragments containing methylated oxFAs
- Fragments related to CO<sub>2</sub> loss
- Position-specific fragments

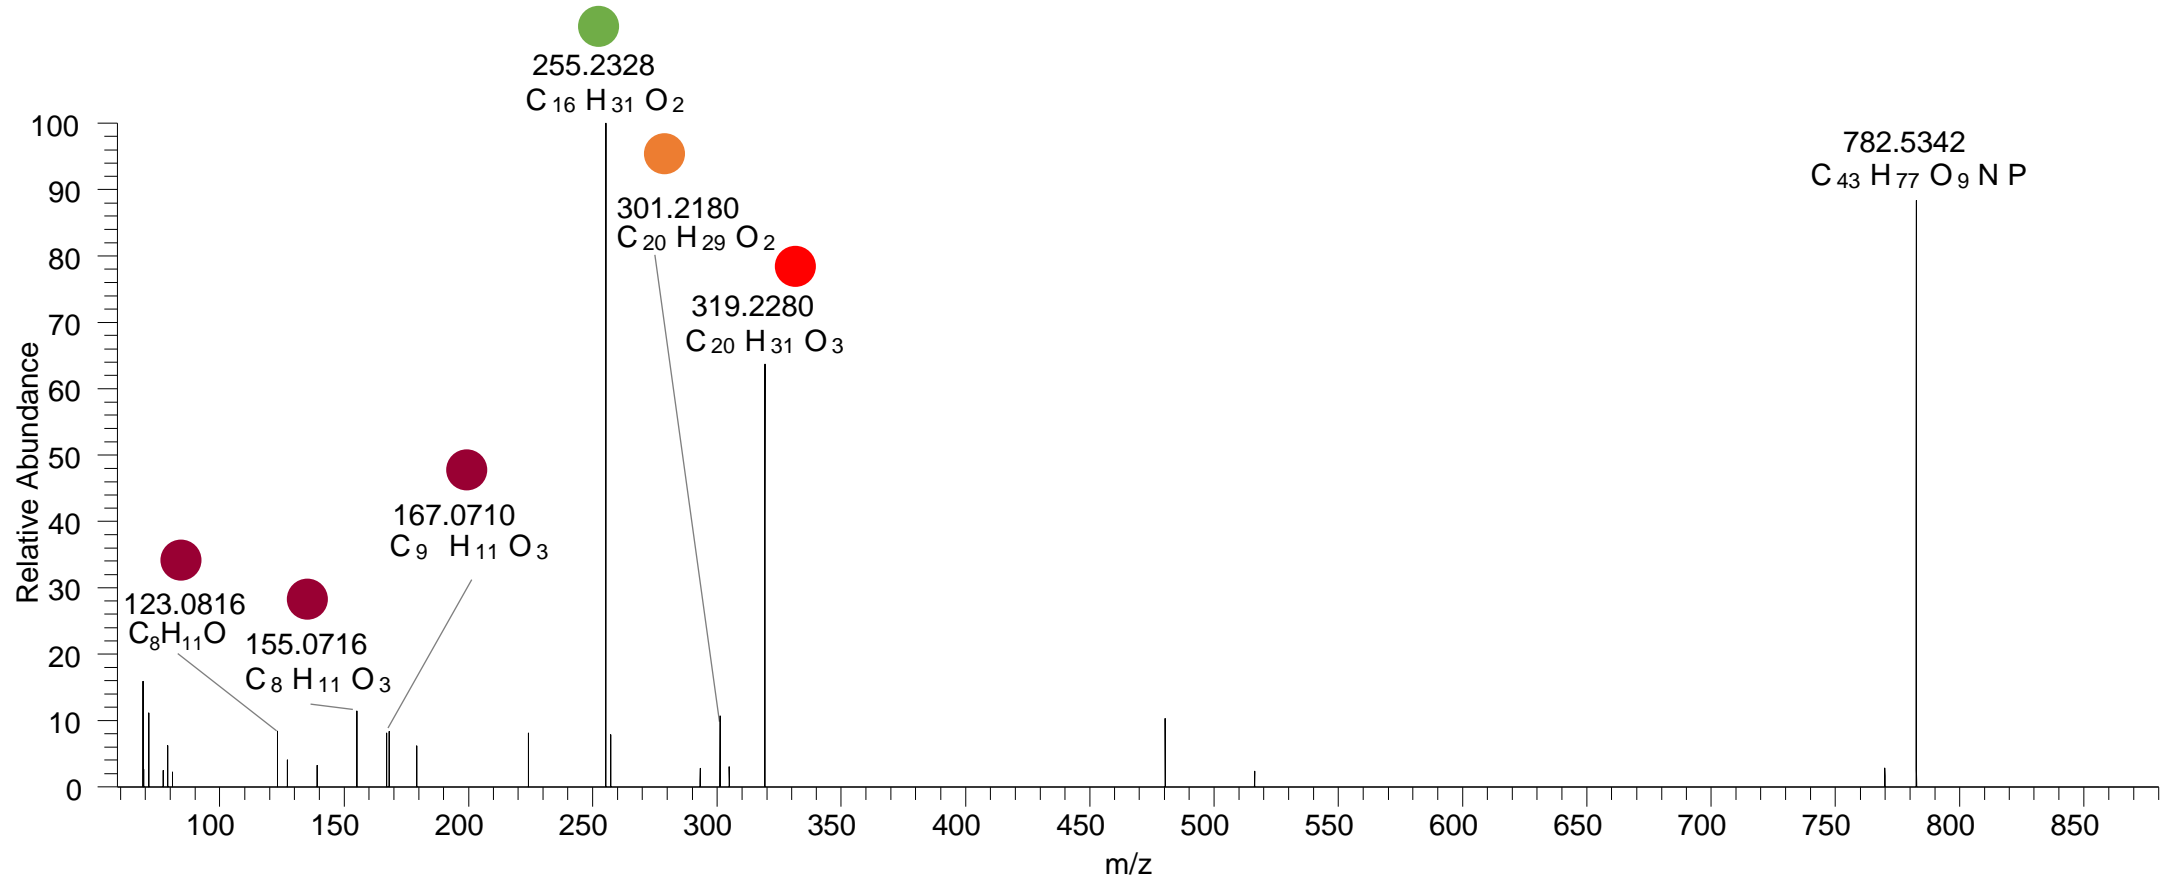

# PC(16:0\_20:4<OH{5}>)

[oxPC+HCOO]<sup>-</sup> XIC 842.5553 NL: 6.83E3

## RT 15.1

- Fragments containing oxFAs
- Fragments related to water loss
- Fragments not containing oxFAs
- Fragments containing methylated oxFAs
- Fragments related to CO<sub>2</sub> loss
- Position-specific fragments

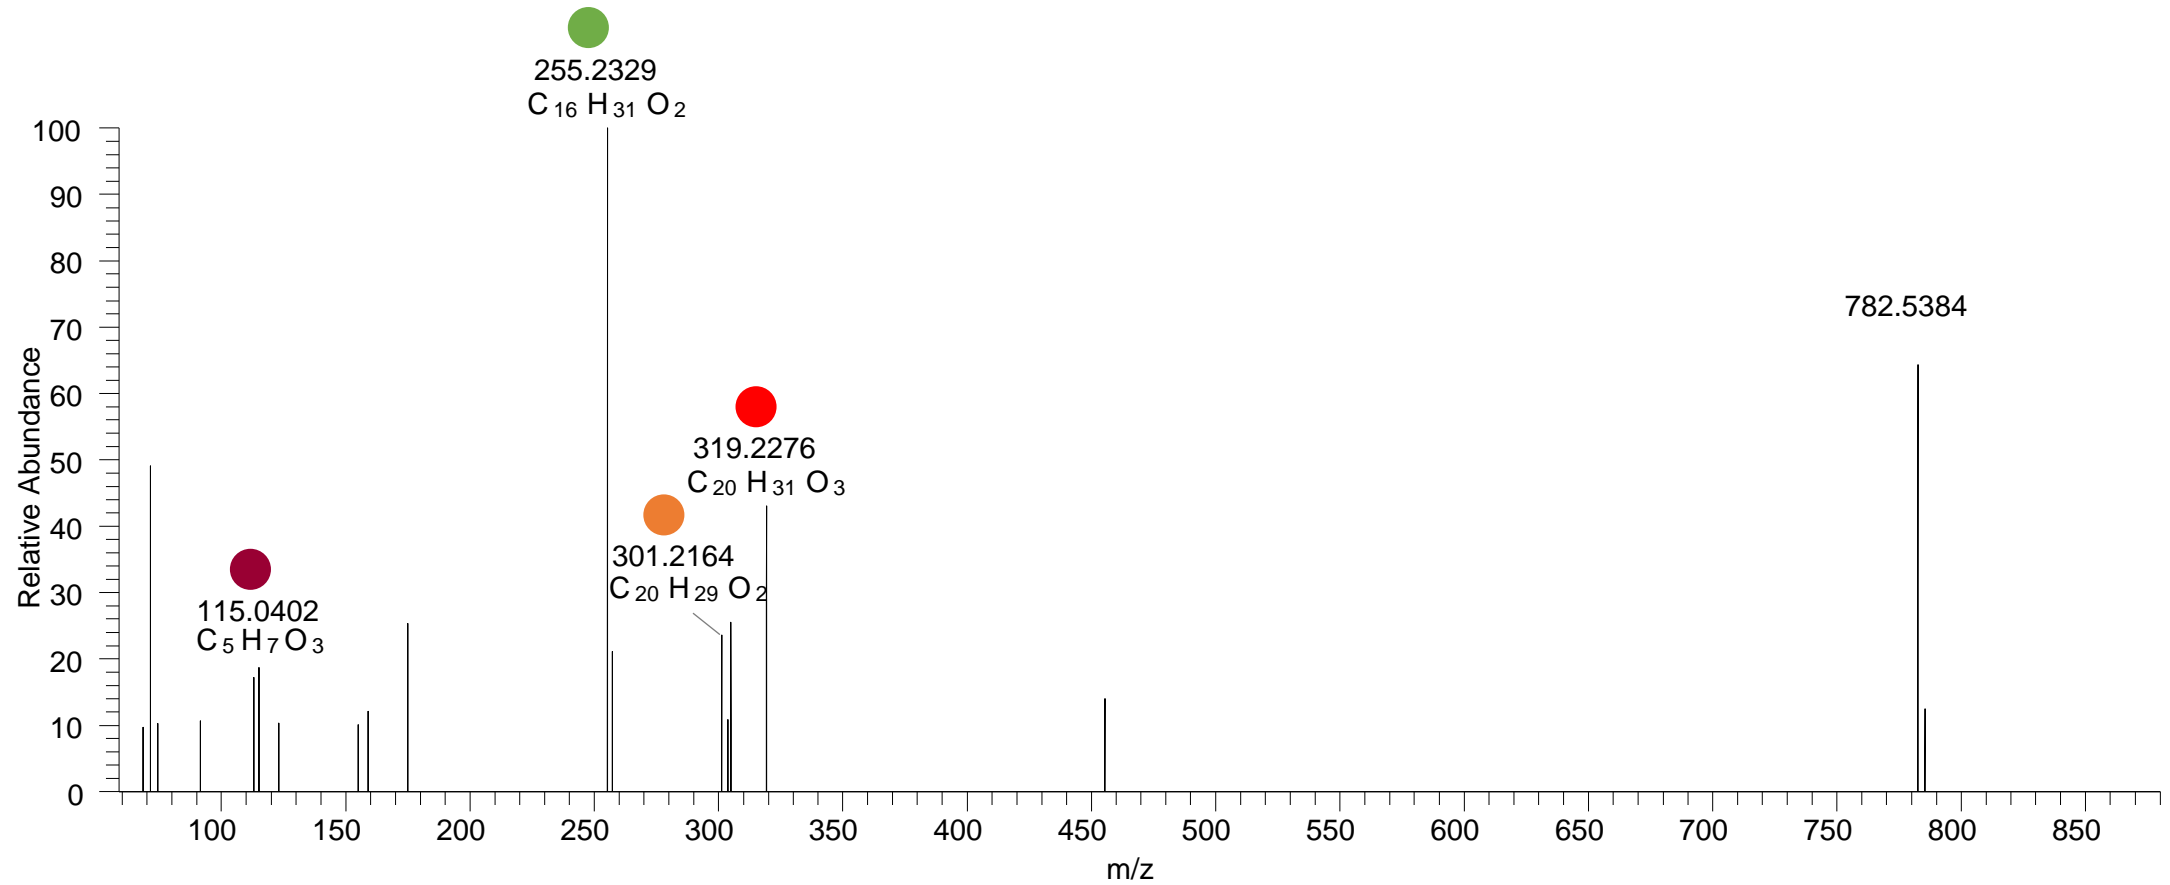

# PC(18:1\_18:2<O>)

[oxPC+HCOO]<sup>-</sup> XIC 844.5709 NL: 5.31E3

## RT 12.8

- Fragments containing oxFAs
- Fragments related to water loss
- Fragments not containing oxFAs
- Fragments containing methylated oxFAs
- Fragments related to CO<sub>2</sub> loss
- Position-specific fragments

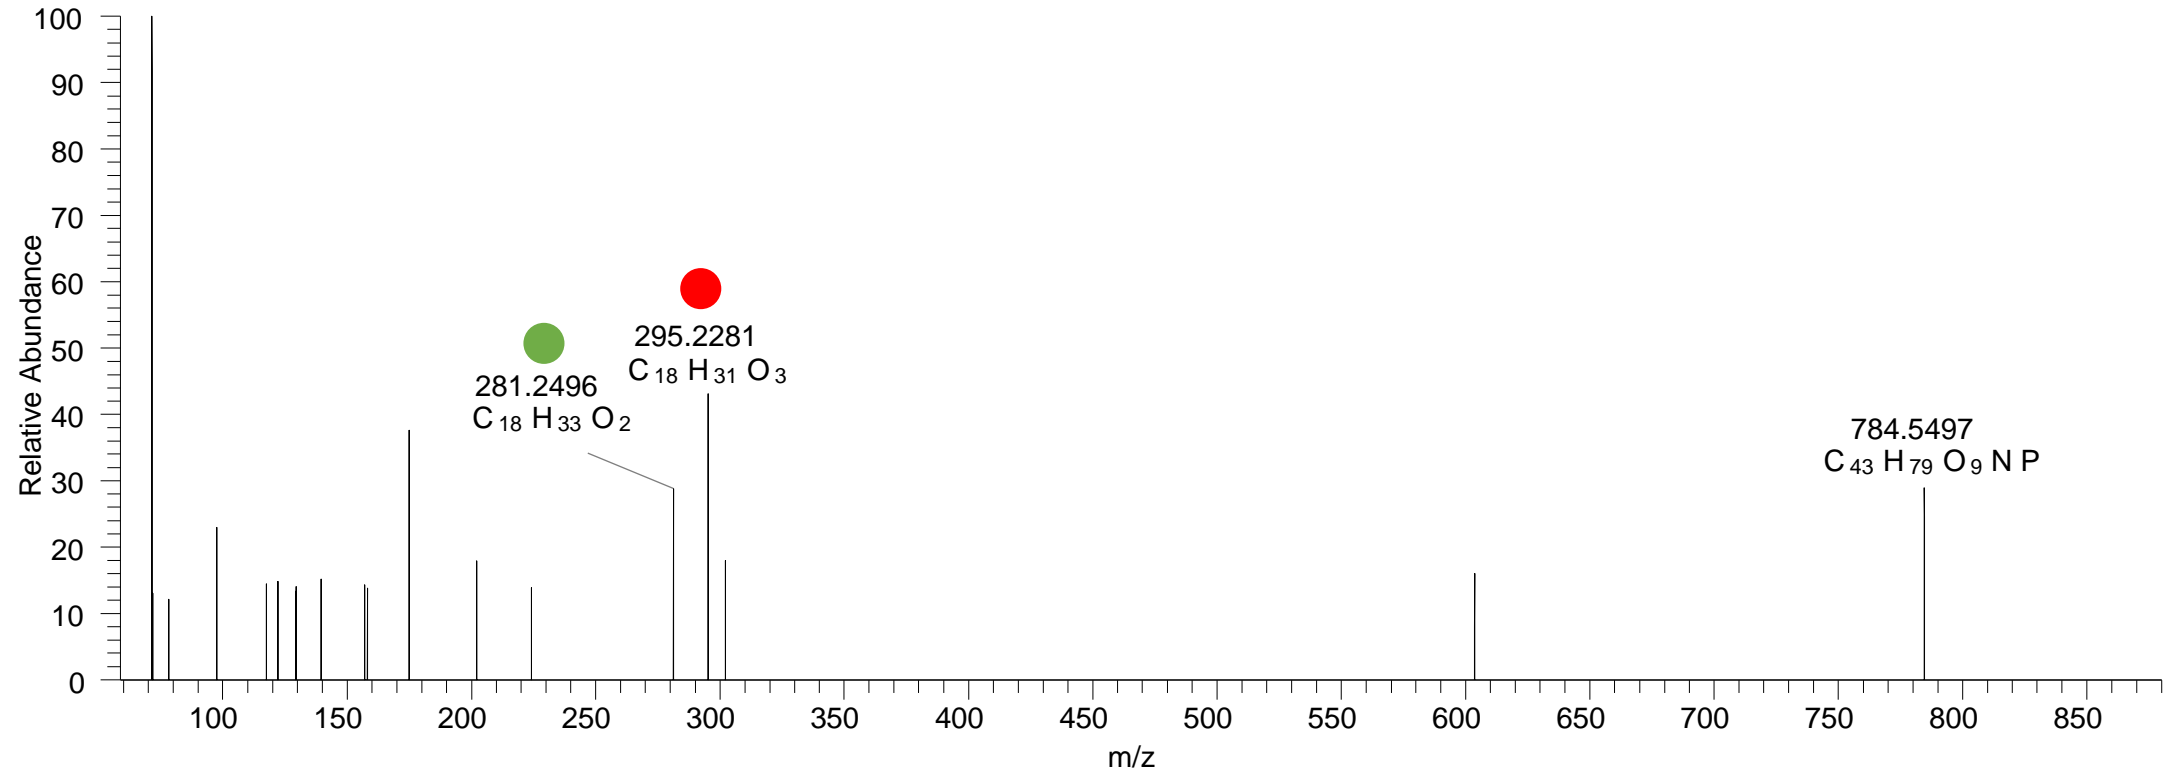

# PC(16:0\_20:3<OH{12}>)

[oxPC+HCOO]<sup>-</sup> XIC 844.5709 NL: 2.08E4

## RT 14.3

- Fragments containing oxFAs
- Fragments related to water loss
- Fragments not containing oxFAs
- Fragments containing methylated oxFAs
- Fragments related to CO<sub>2</sub> loss
- Position-specific fragments

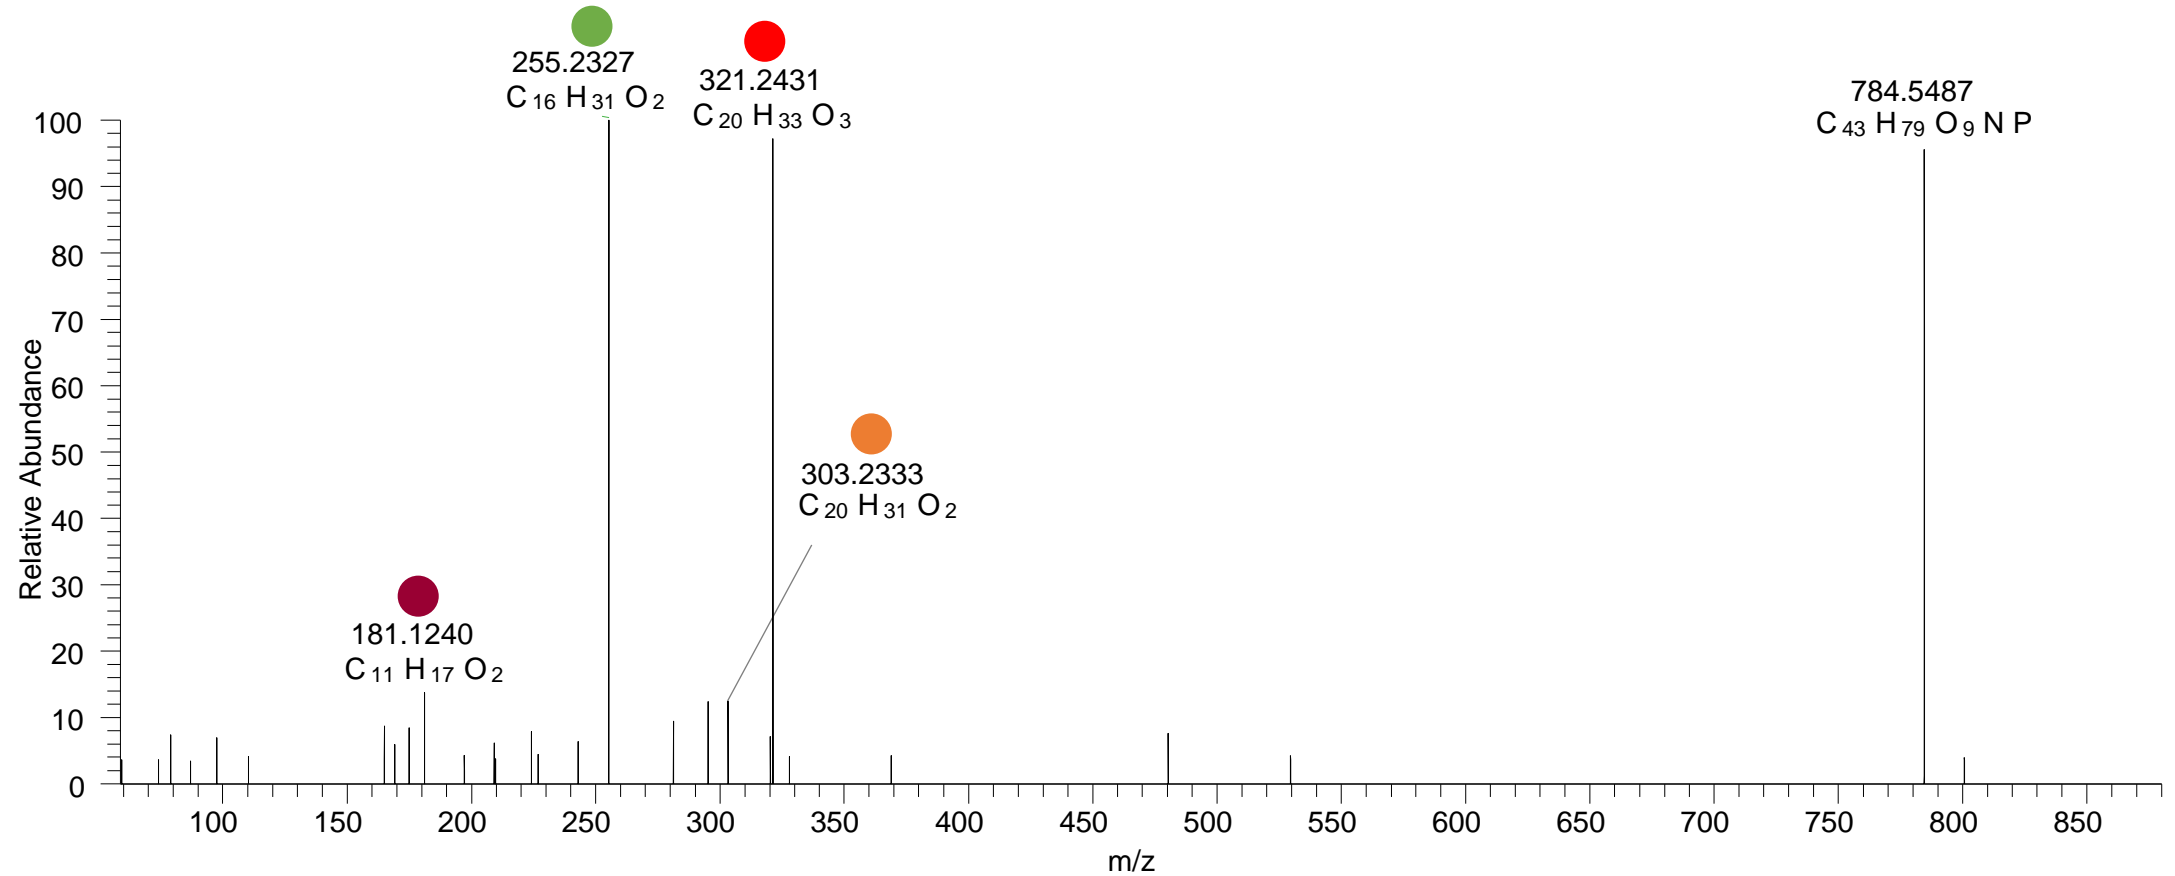



# PC(18:0\_18:2<O>) PC(16:0\_20:2<OH>) RT 14.6

[oxPC+HCOO]<sup>-</sup> XIC 846.5866 NL: 5.96E3

- Fragments containing oxFAs
- Fragments related to water loss
- Fragments not containing oxFAs
- Fragments containing methylated oxFAs
- Fragments related to CO<sub>2</sub> loss
- Position-specific fragments

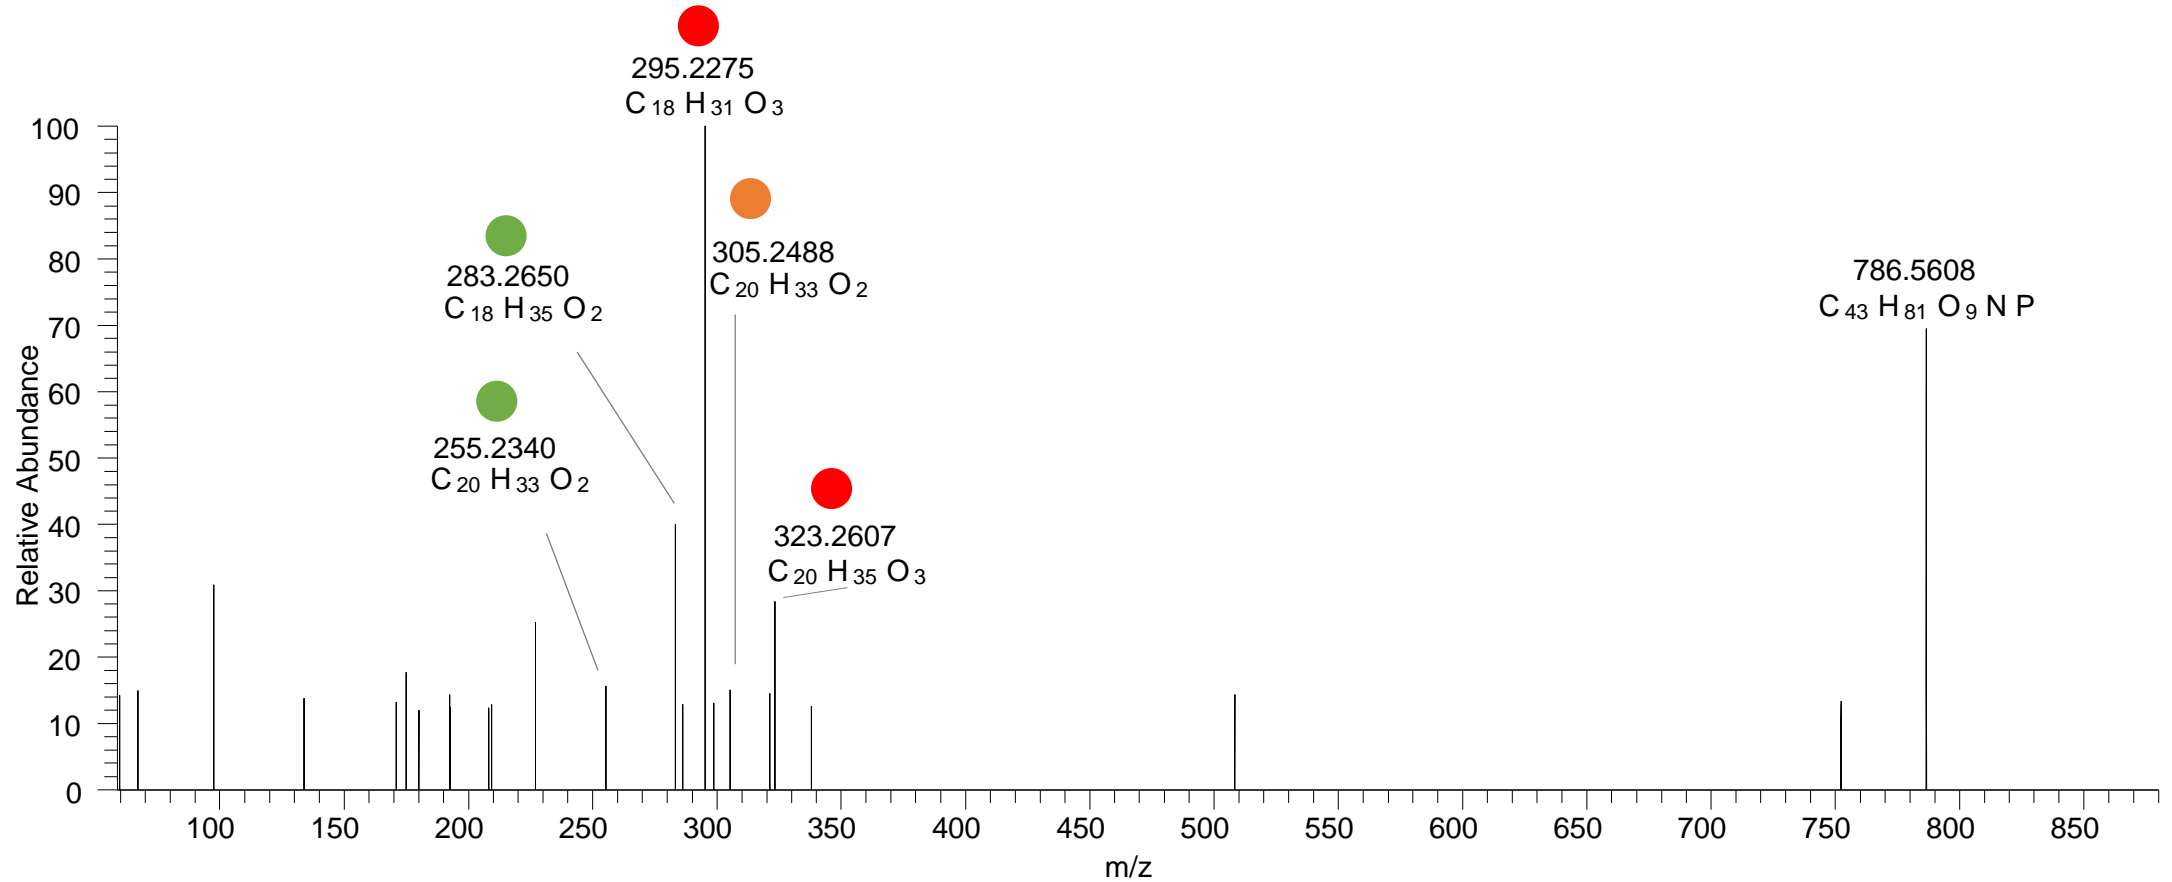

# PC(18:0\_18:2<O>)

[oxPC+HCOO]<sup>-</sup> XIC 846.5866 NL: 2.75E3

## RT 14.8

- Fragments containing oxFAs
- Fragments related to water loss
- Fragments not containing oxFAs
- Fragments containing methylated oxFAs
- Fragments related to CO<sub>2</sub> loss
- Position-specific fragments

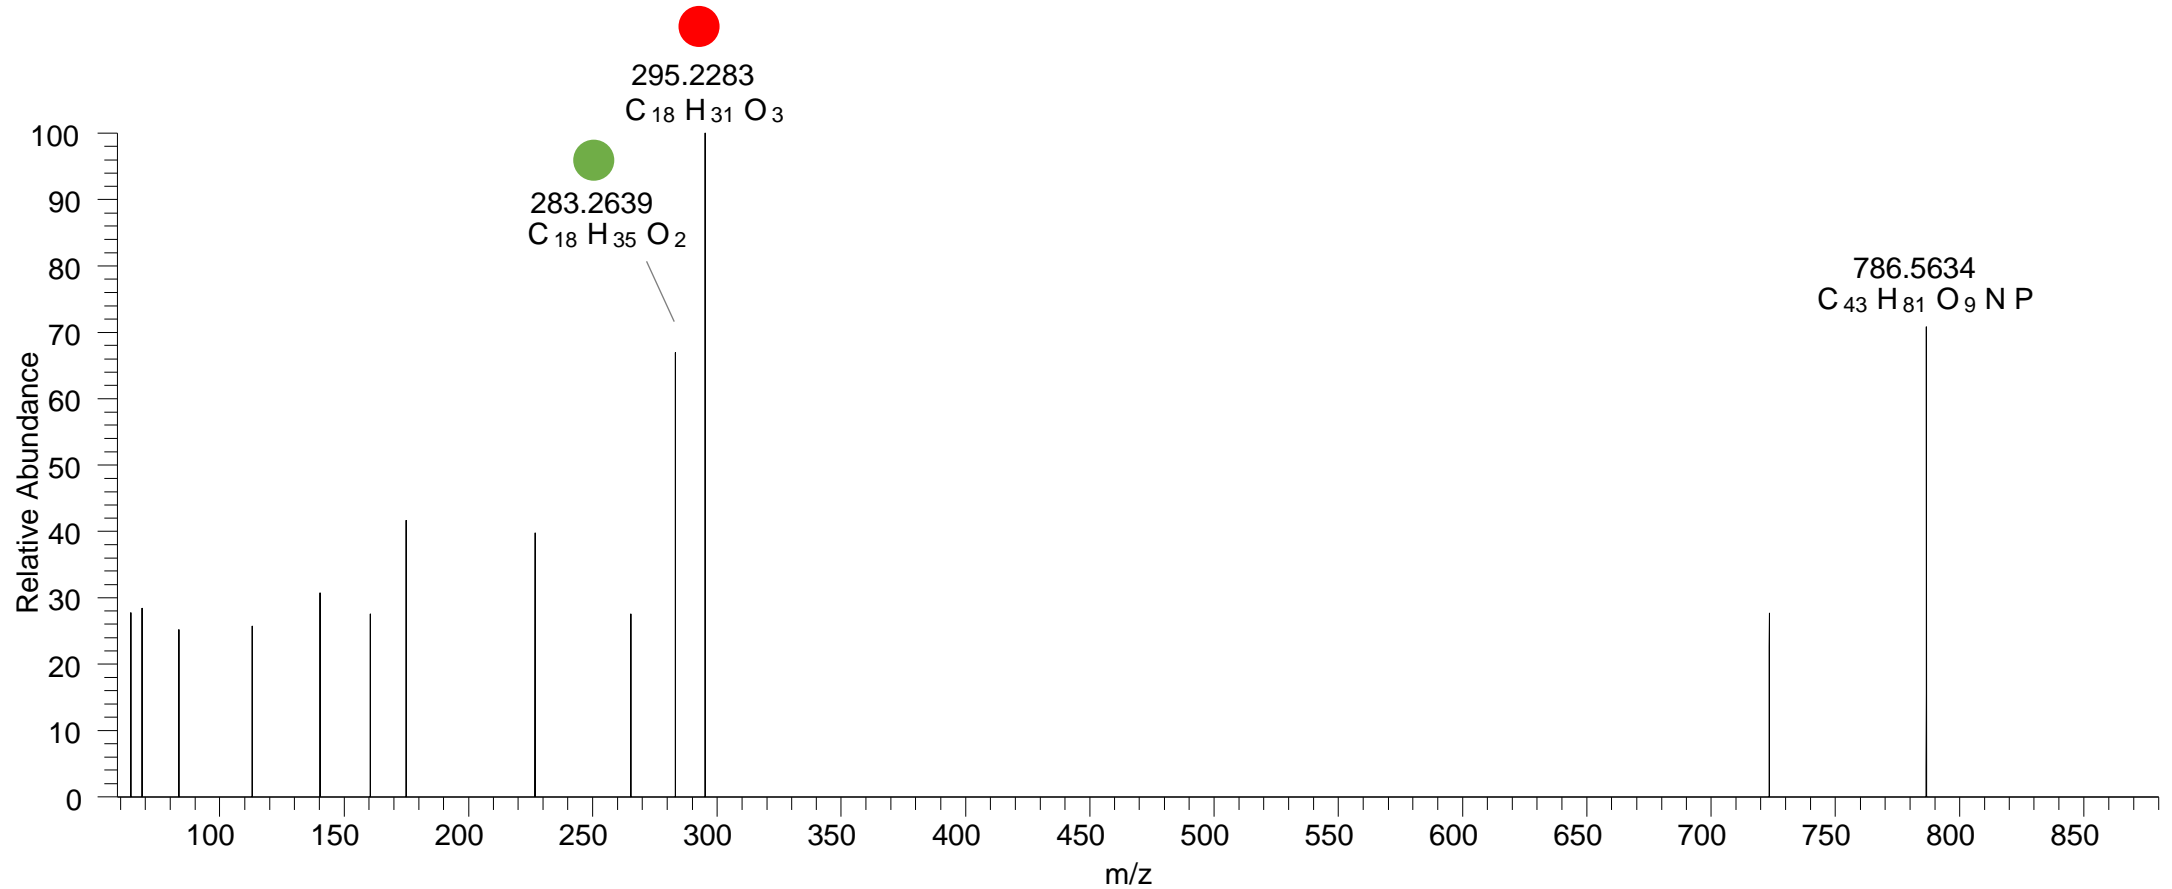

# PC(18:0\_18:2<OH{13}>)

[oxPC+HCOO]<sup>-</sup> XIC 846.5866 NL: 4.09E4

## RT 15.0

- Fragments containing oxFAs
- Fragments related to water loss
- Fragments not containing oxFAs
- Fragments containing methylated oxFAs
- Fragments related to CO<sub>2</sub> loss
- Position-specific fragments

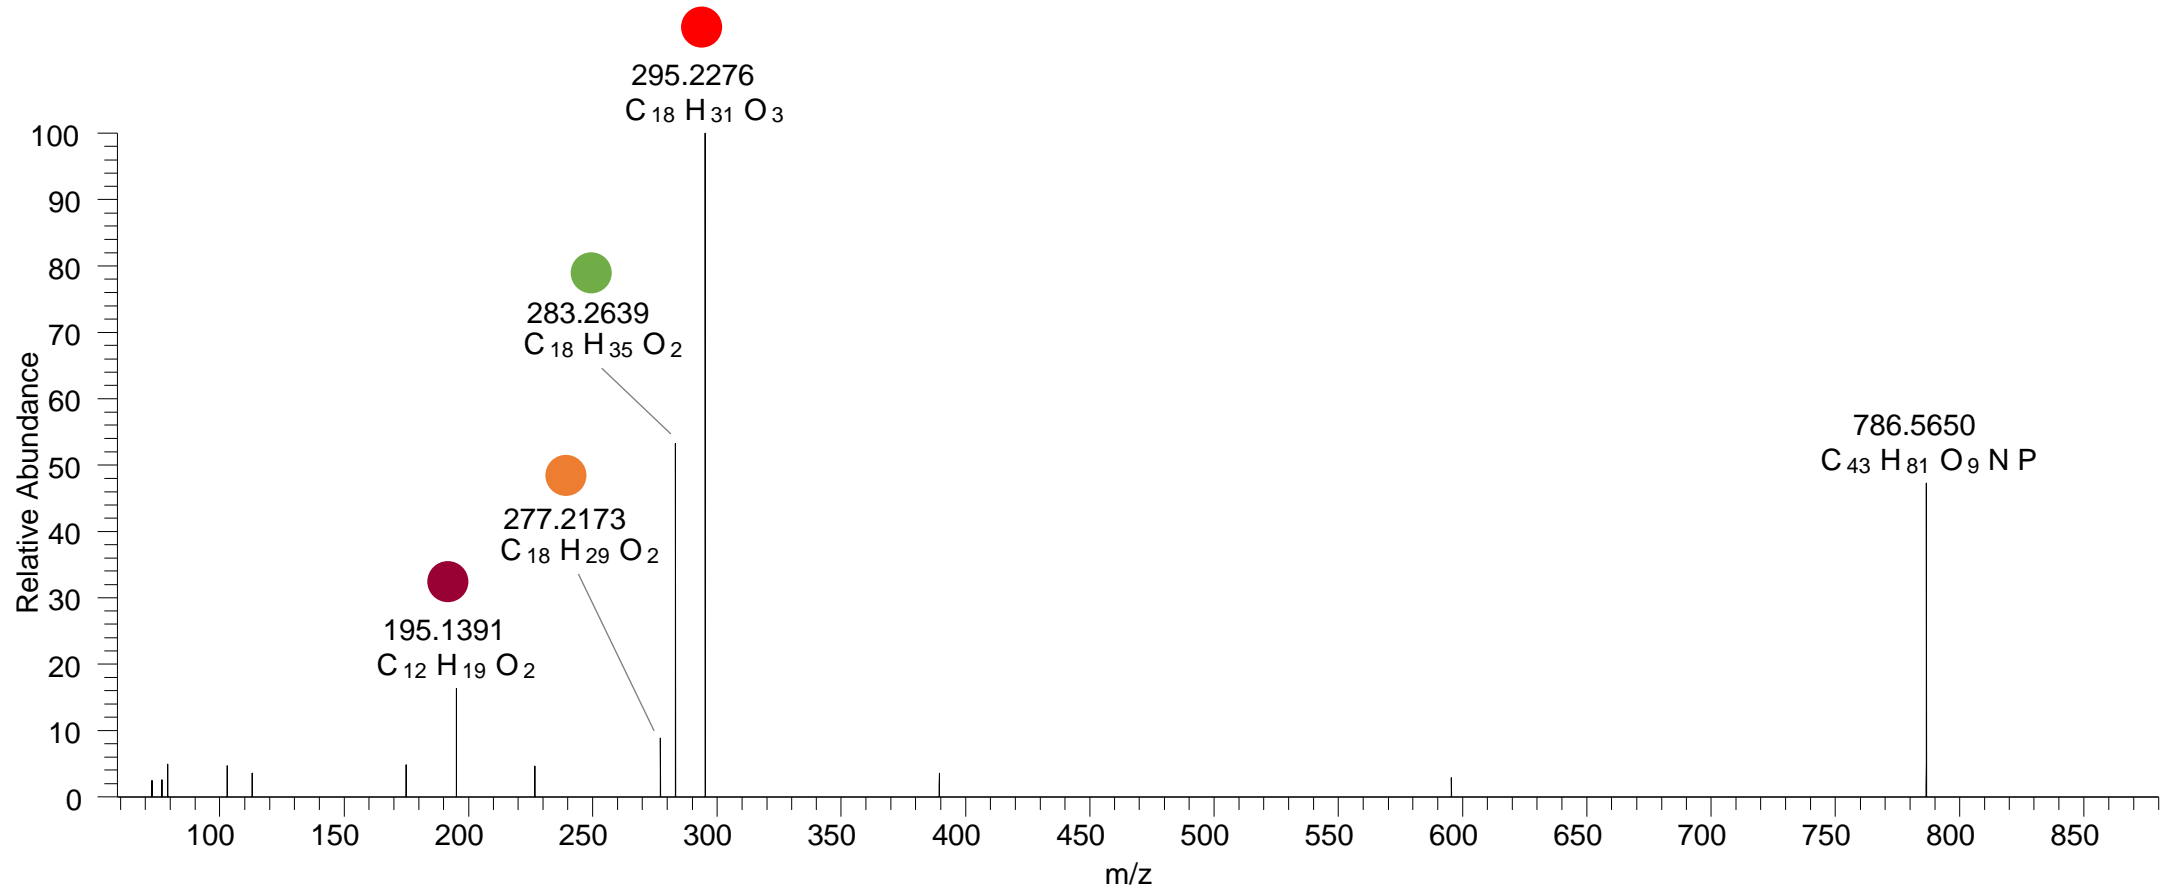

# PC(18:0\_18:2<OH{9}>)

[oxPC+HCOO]<sup>-</sup> XIC 846.5866 NL: 3.95E4

## RT 15.3

- Fragments containing oxFAs
- Fragments related to water loss
- Fragments not containing oxFAs
- Fragments containing methylated oxFAs
- Fragments related to CO<sub>2</sub> loss
- Position-specific fragments

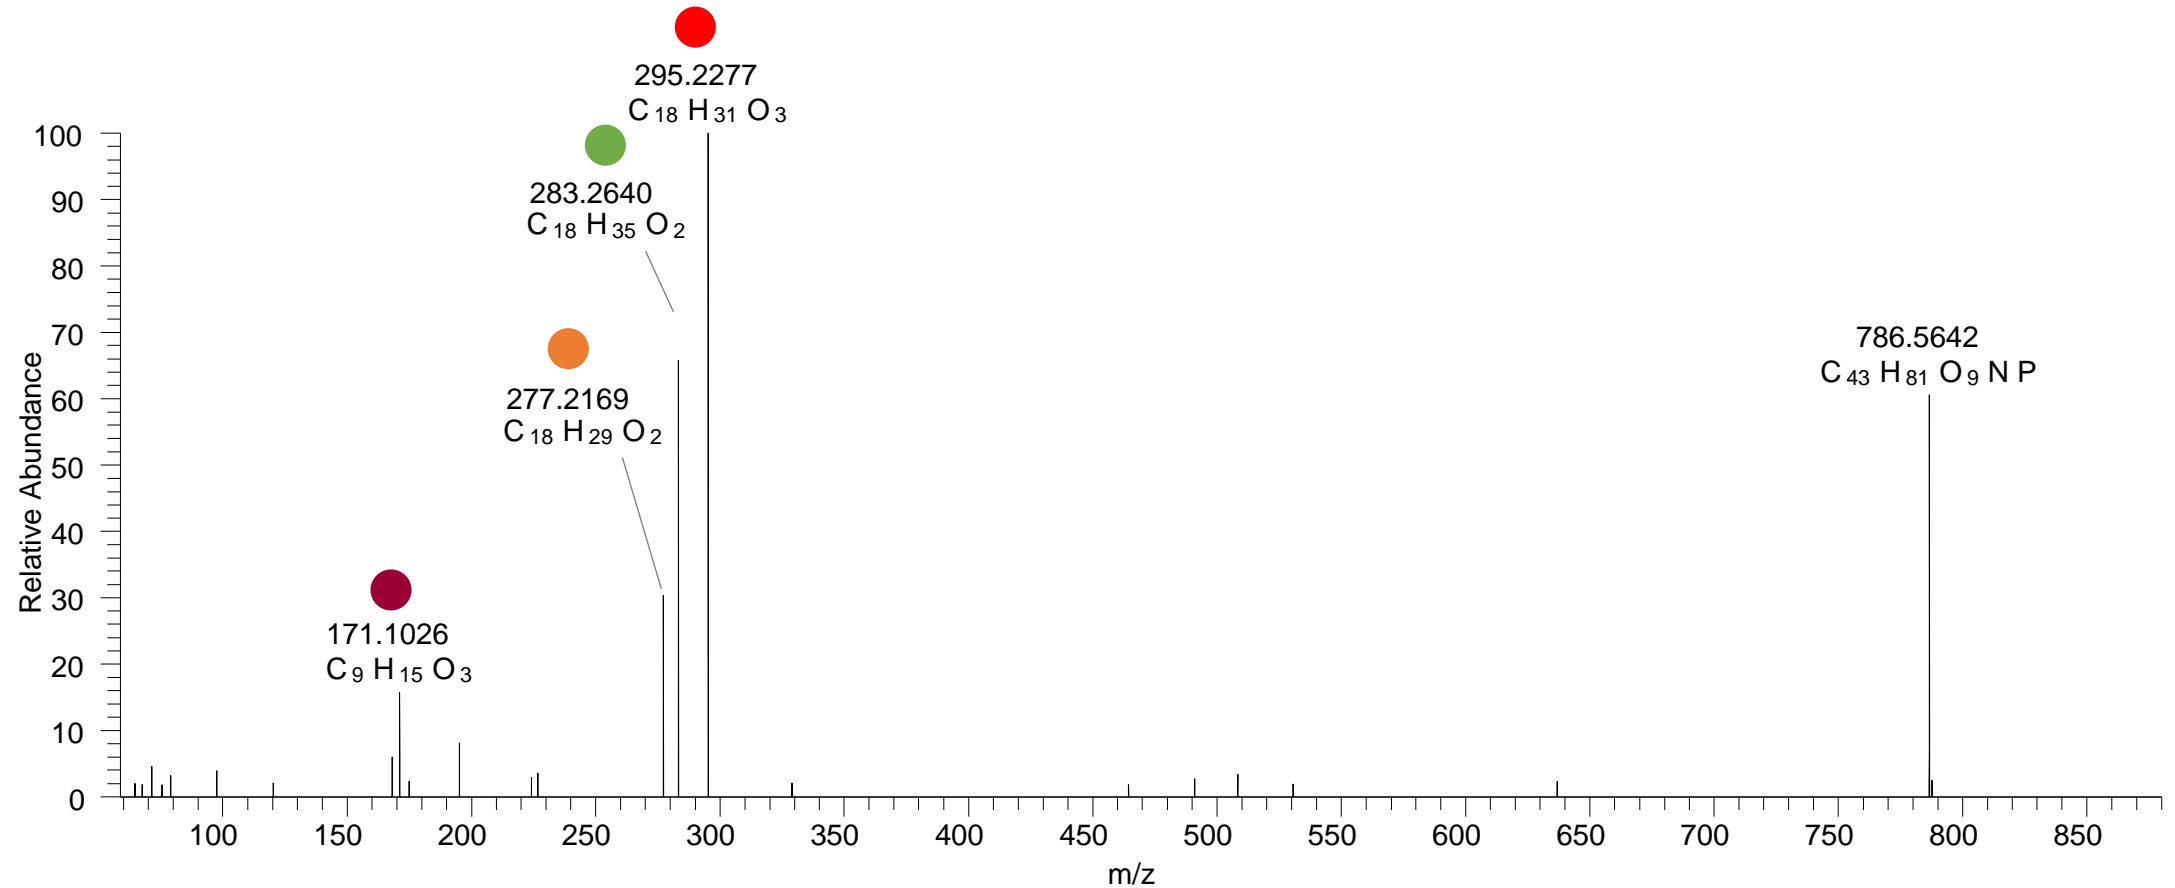

# PC(16:0\_18:2<OOH,OH>)

[oxPC+HCOO]<sup>-</sup> XIC 850.5451 NL: 8.02E3

## RT 11.7

- Fragments containing oxFAs
- Fragments related to water loss
- Fragments not containing oxFAs
- Fragments containing methylated oxFAs
- Fragments related to CO<sub>2</sub> loss
- Position-specific fragments

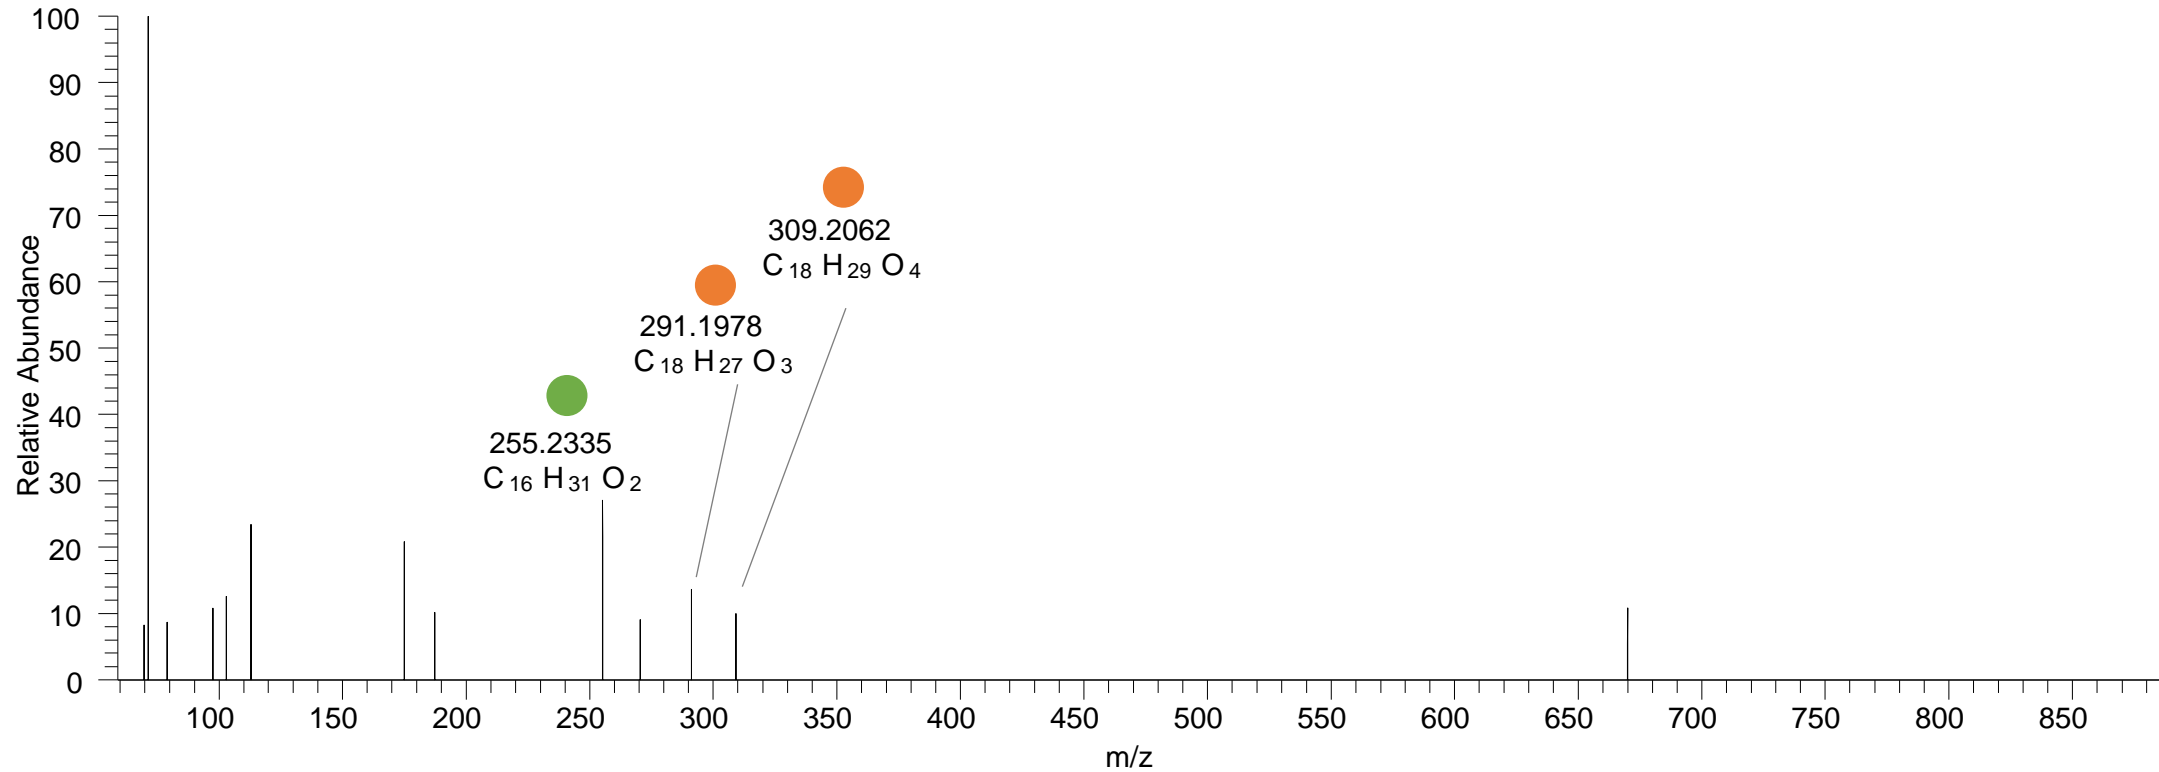

# PC(16:0\_20:4<OH,O>)

[oxPC+HCOO]<sup>-</sup> XIC 858.5502 NL: 6.06E3

## RT 11.1

- Fragments containing oxFAs
- Fragments related to water loss
- Fragments not containing oxFAs
- Fragments containing methylated oxFAs
- Fragments related to CO<sub>2</sub> loss
- Position-specific fragments

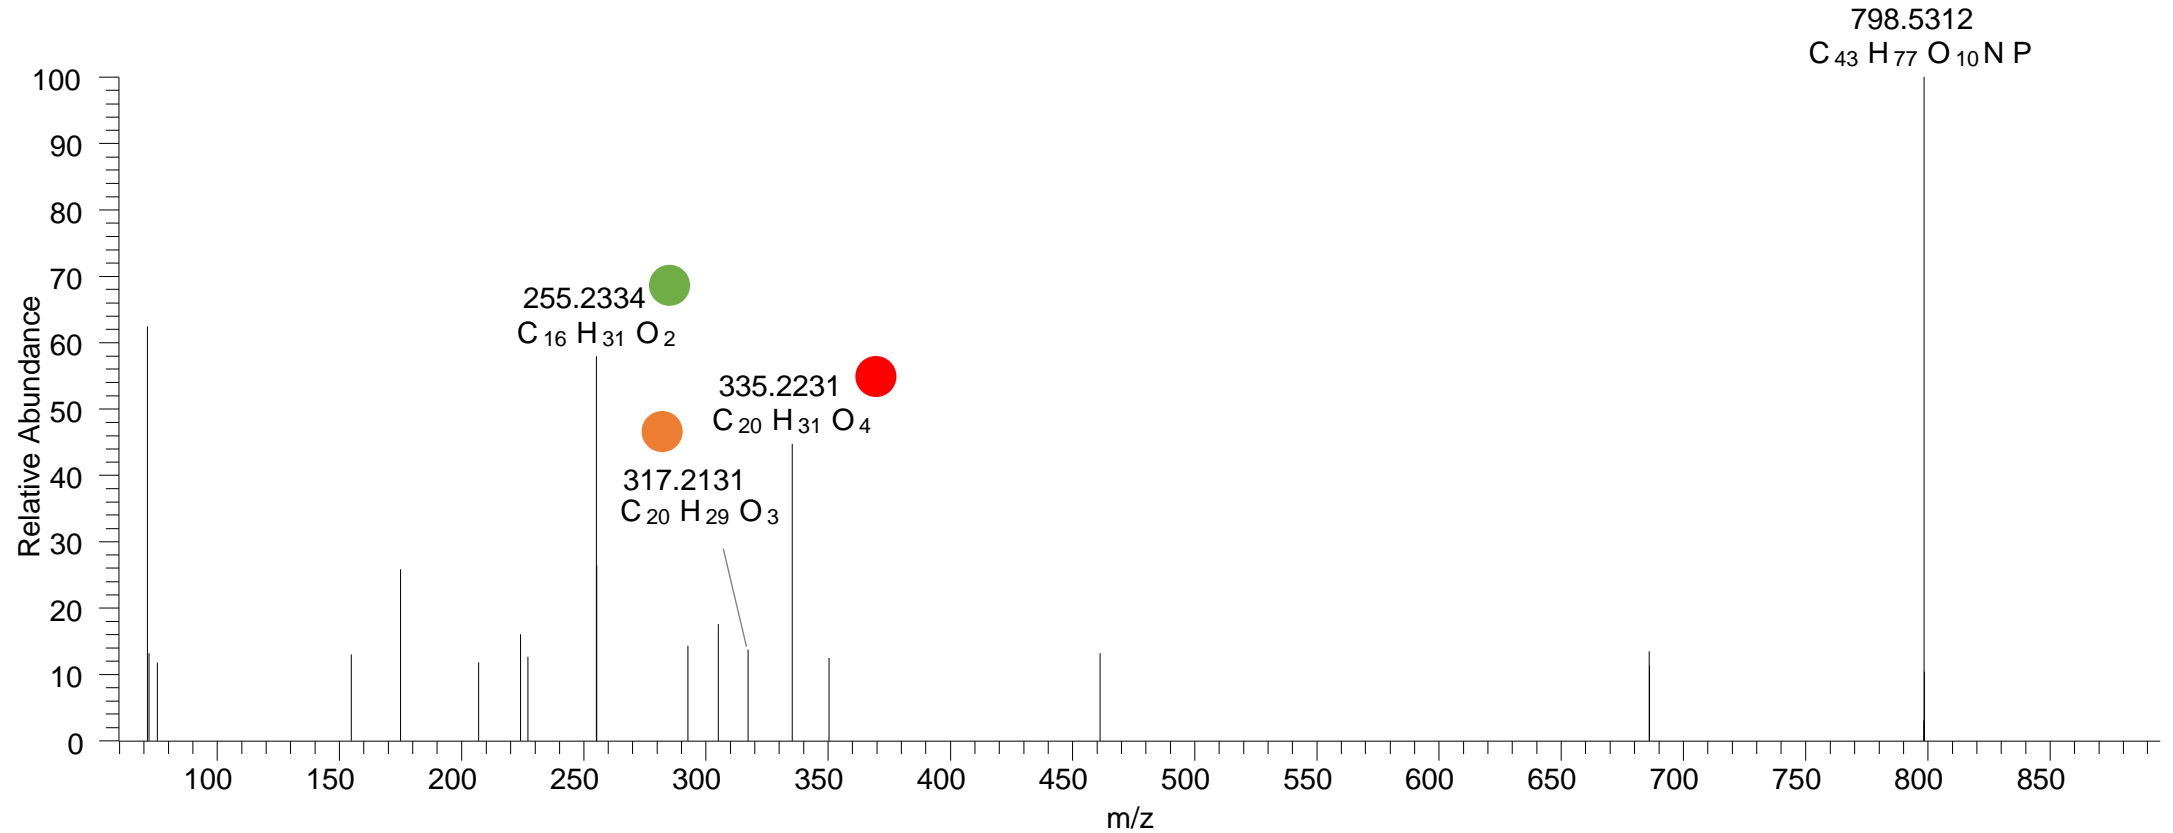

# PC(16:0\_20:4<2O>)

[oxPC+HCOO]<sup>-</sup> XIC 858.5502 NL: 3.17E3

## RT 12.0

- Fragments containing oxFAs
- Fragments related to water loss
- Fragments not containing oxFAs
- Fragments containing methylated oxFAs
- Fragments related to CO<sub>2</sub> loss
- Position-specific fragments

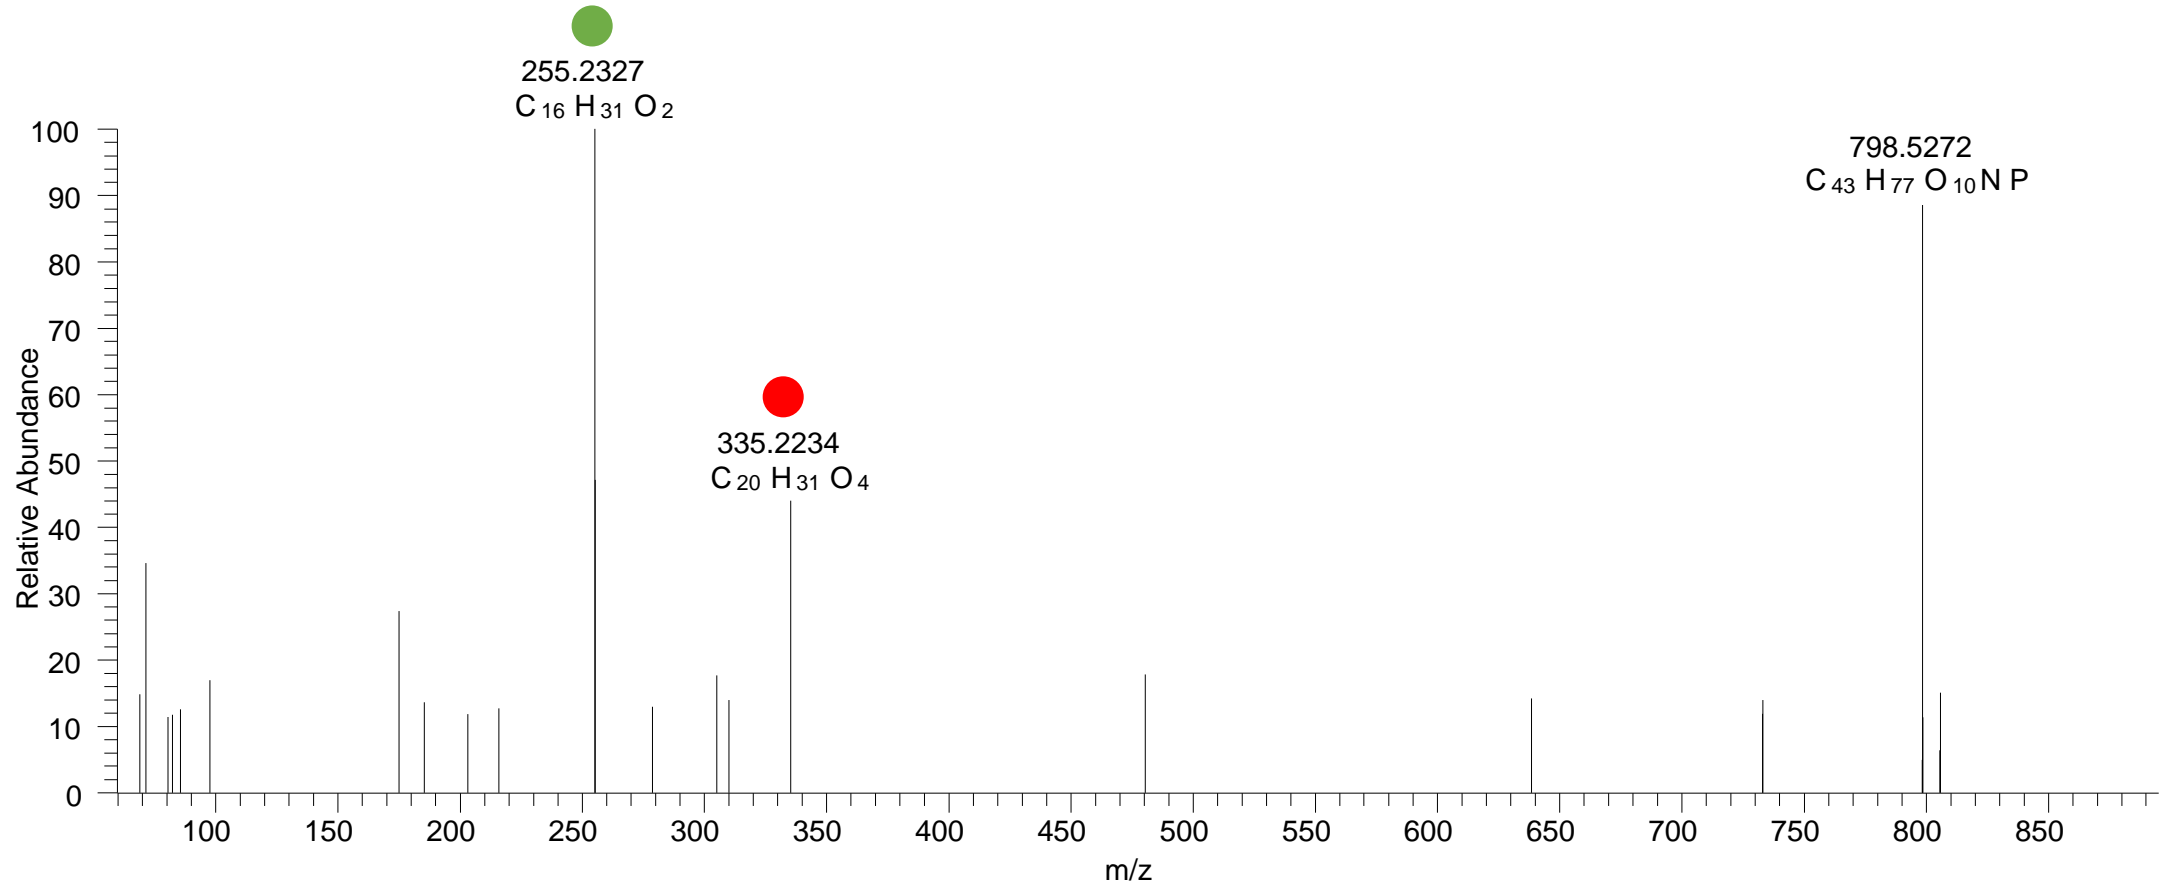

# PC(16:0\_20:4<OOH>)

[oxPC+HCOO]<sup>-</sup> XIC 858.5502 NL: 2.41E3

## RT 13.3

- Fragments containing oxFAs
- Fragments related to water loss
- Fragments not containing oxFAs
- Fragments containing methylated oxFAs
- Fragments related to CO<sub>2</sub> loss
- Position-specific fragments

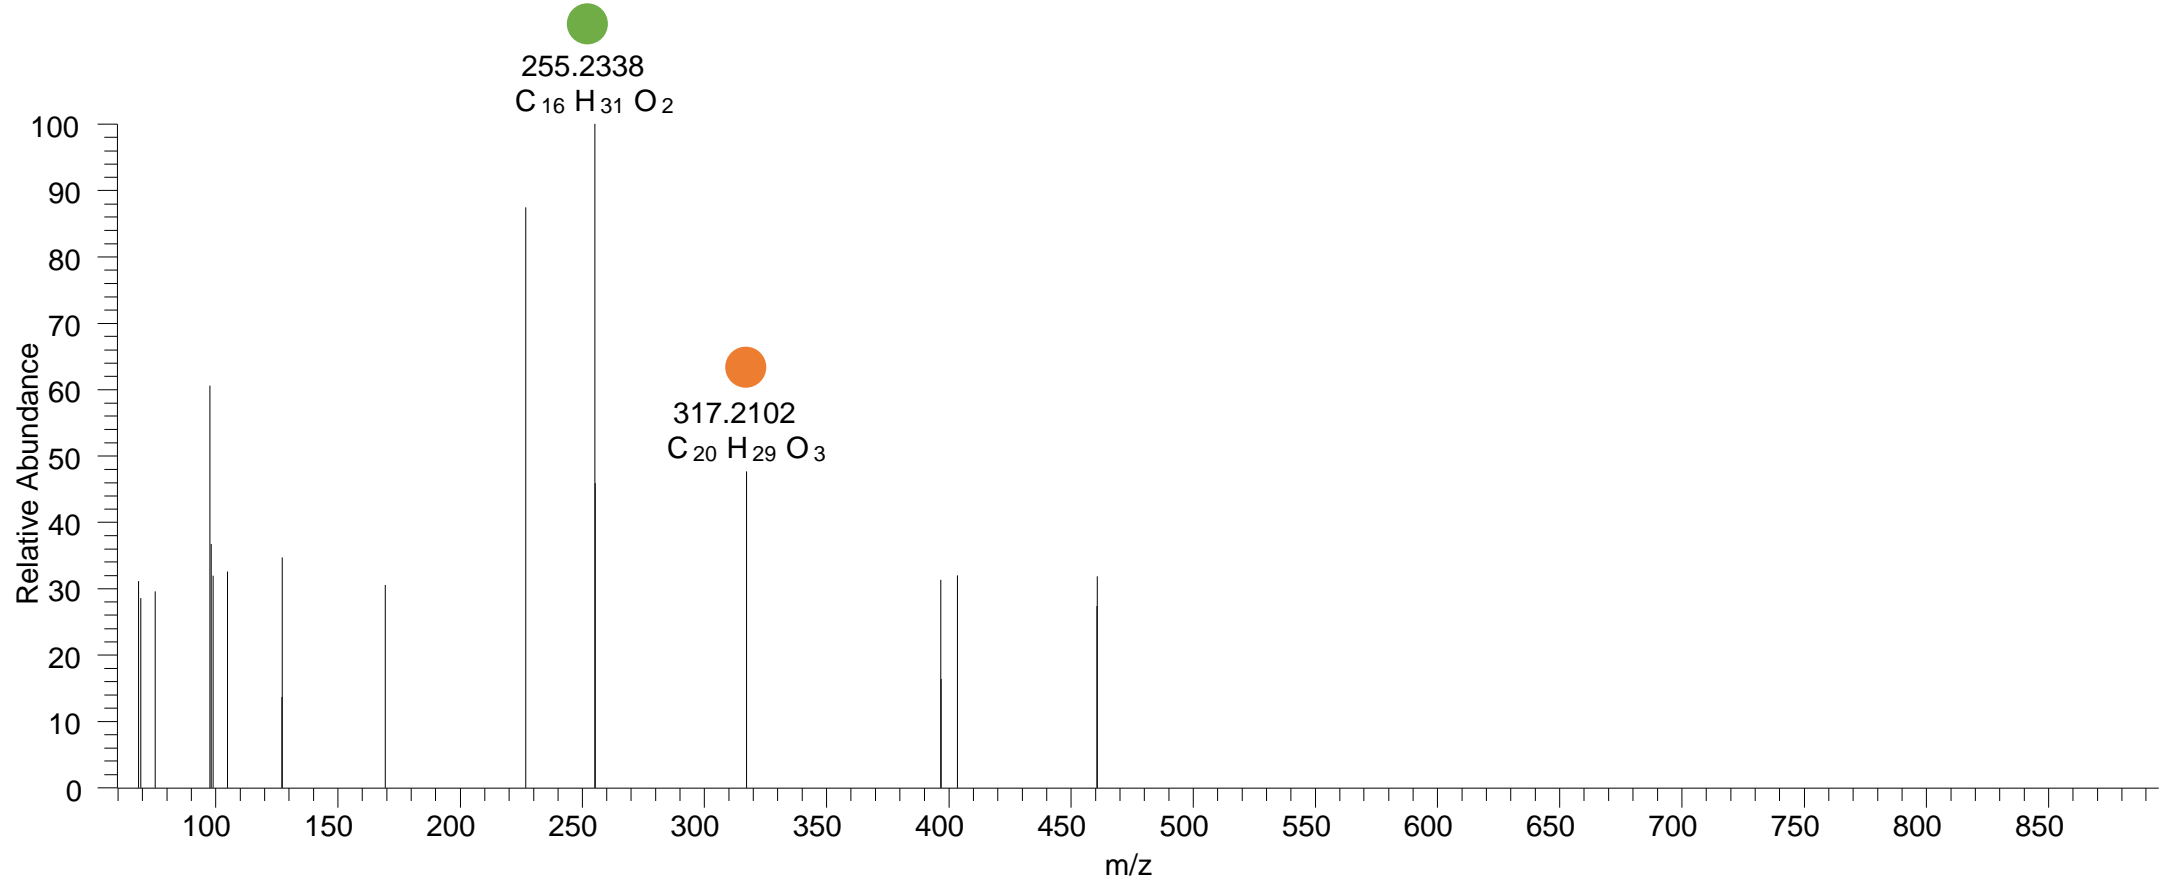



# PC(16:0\_20:4<OOH{15}>)

[oxPC+HCOO]<sup>-</sup> XIC 858.5502 NL: 5.87E3

## RT 13.5

- Fragments containing oxFAs
- Fragments related to water loss
- Fragments not containing oxFAs
- Fragments containing methylated oxFAs
- Fragments related to CO<sub>2</sub> loss
- Position-specific fragments

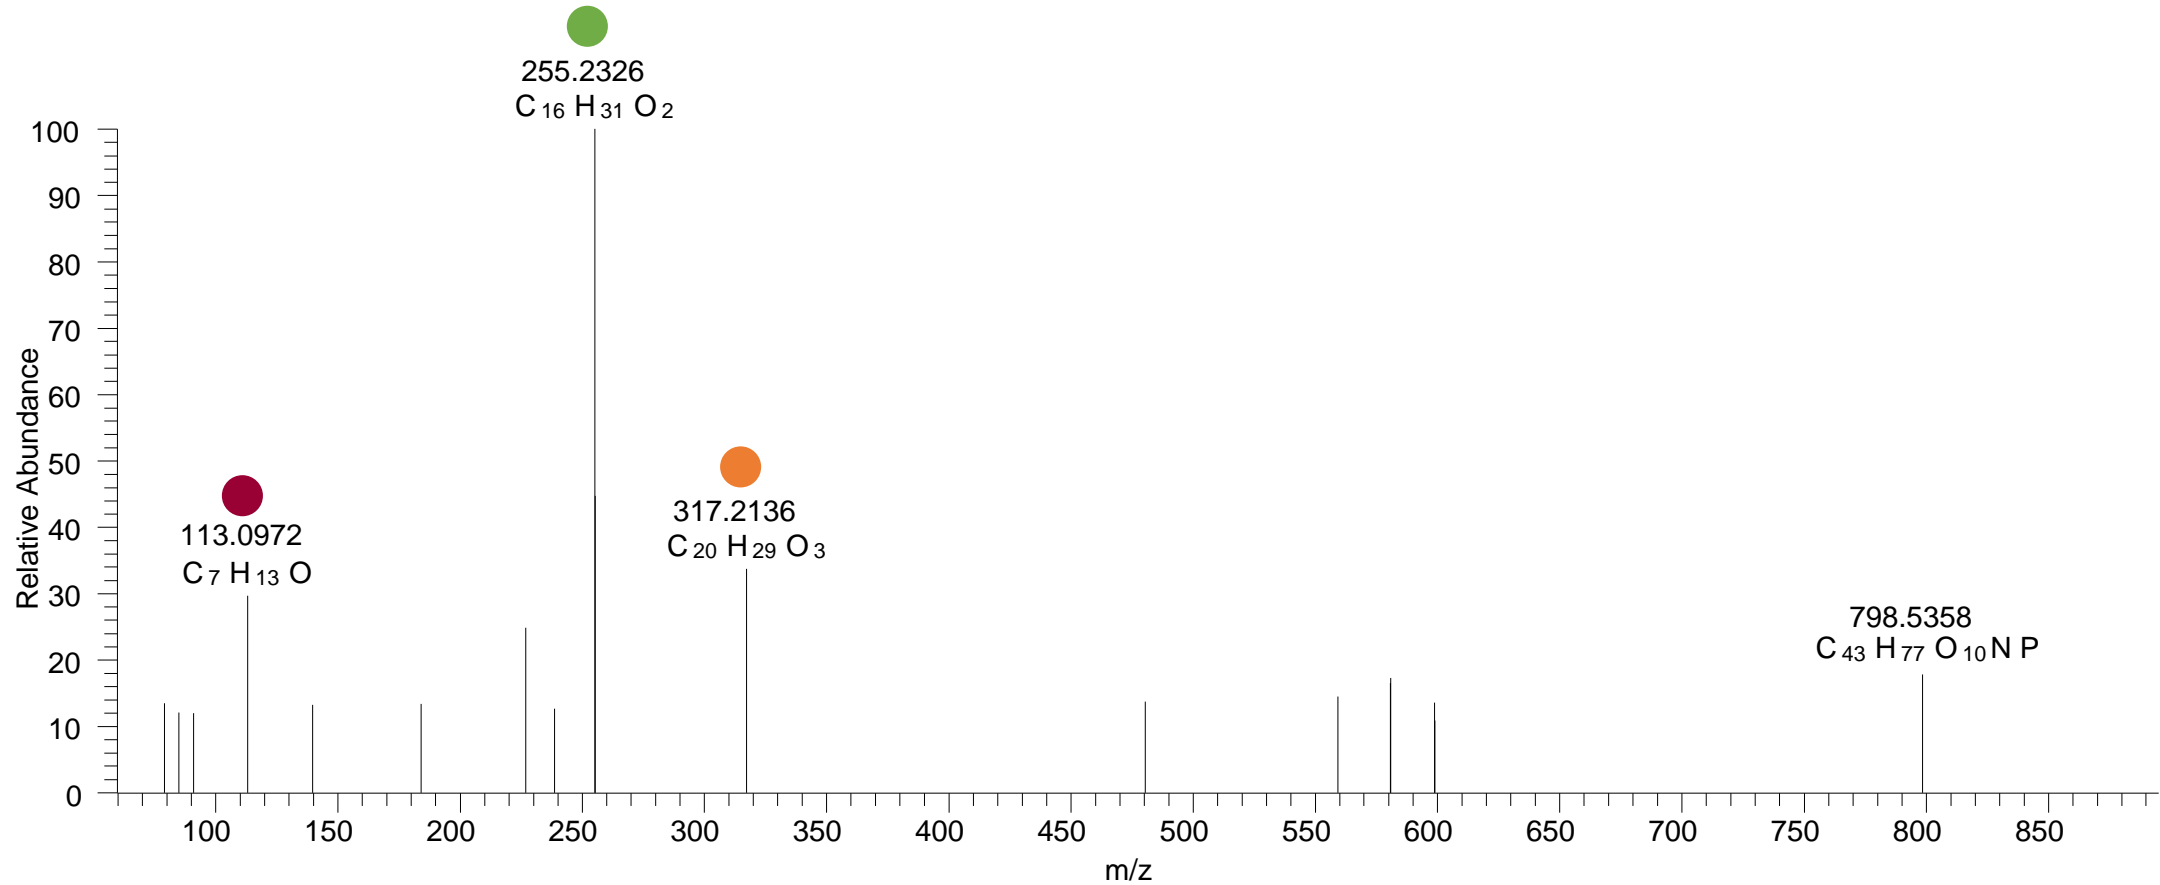

# PC(16:0\_20:4<OOH{12}>)

[oxPC+HCOO]<sup>-</sup> XIC 858.5502 NL: 6.70E3

## RT 13.9

- Fragments containing oxFAs
- Fragments related to water loss
- Fragments not containing oxFAs
- Fragments containing methylated oxFAs
- Fragments related to CO<sub>2</sub> loss
- Position-specific fragments

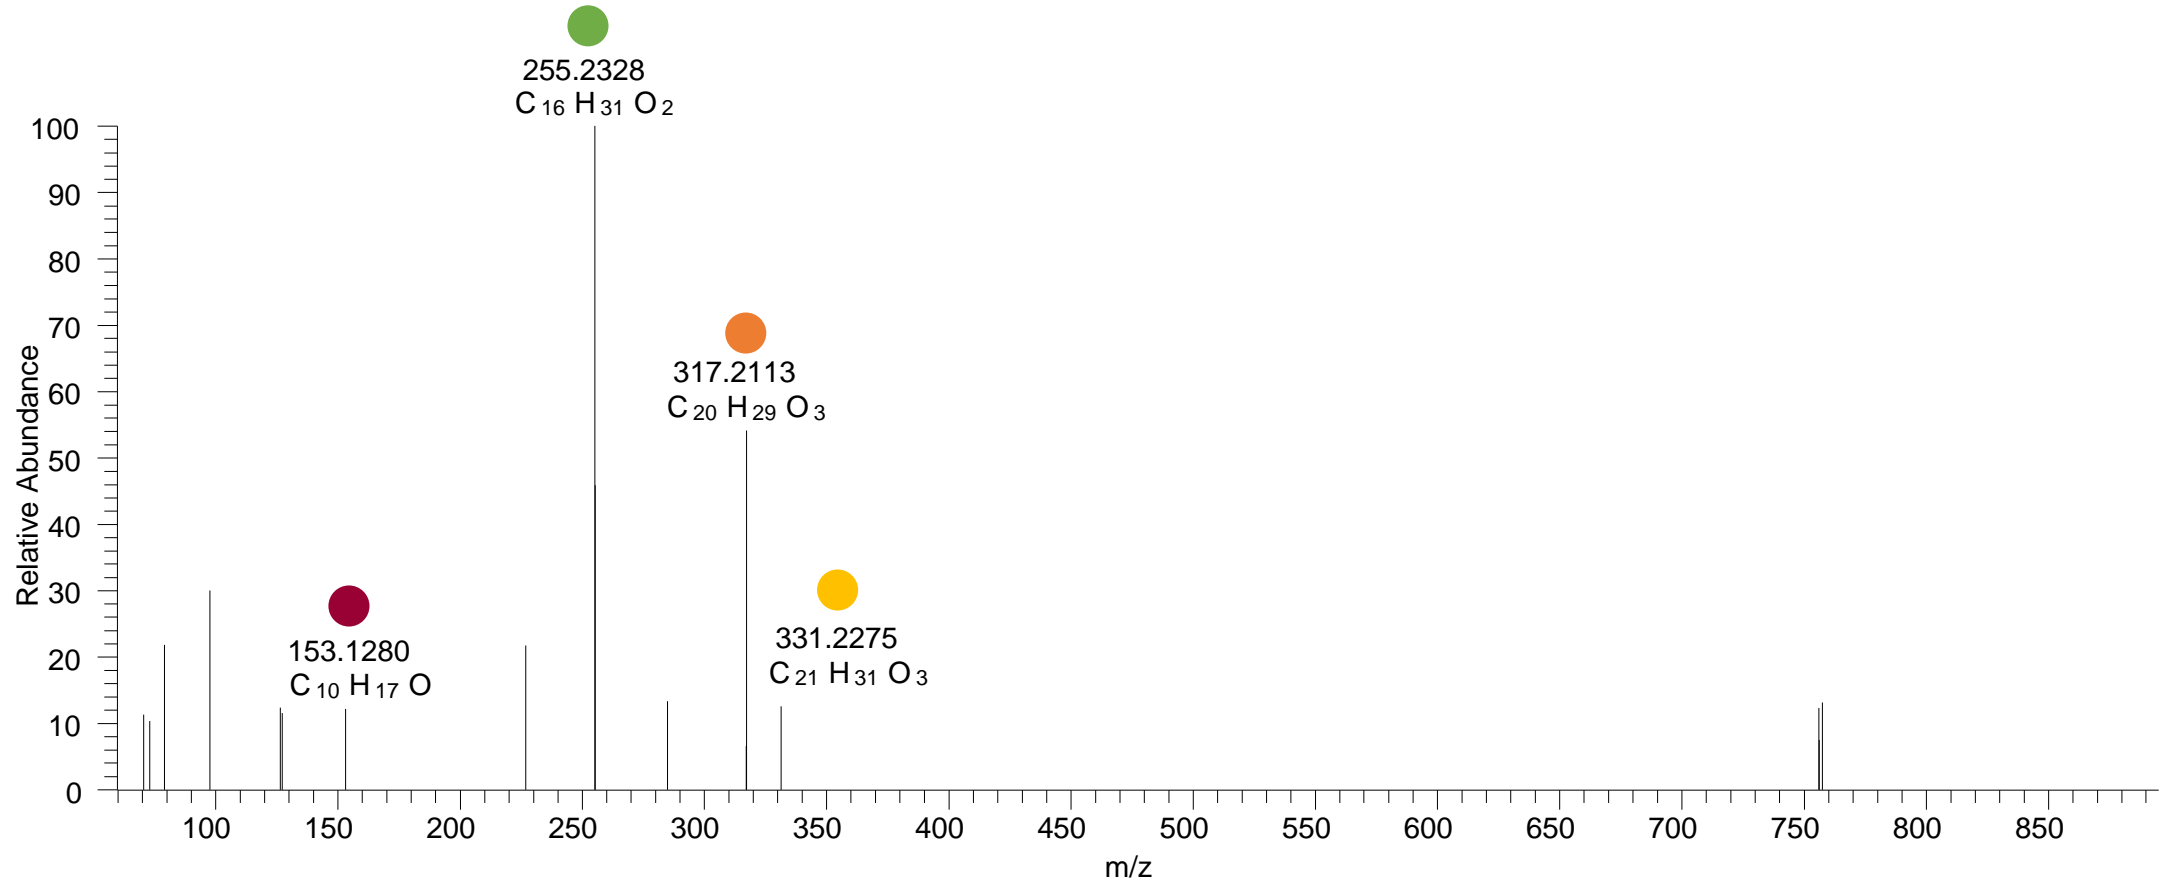

# PC(16:0\_20:4<OOH{7}>)

[oxPC+HCOO]<sup>-</sup> XIC 858.5502 NL: 7.78E3

## RT 14.4

- Fragments containing oxFAs
- Fragments related to water loss
- Fragments not containing oxFAs
- Fragments containing methylated oxFAs
- Fragments related to CO<sub>2</sub> loss
- Position-specific fragments

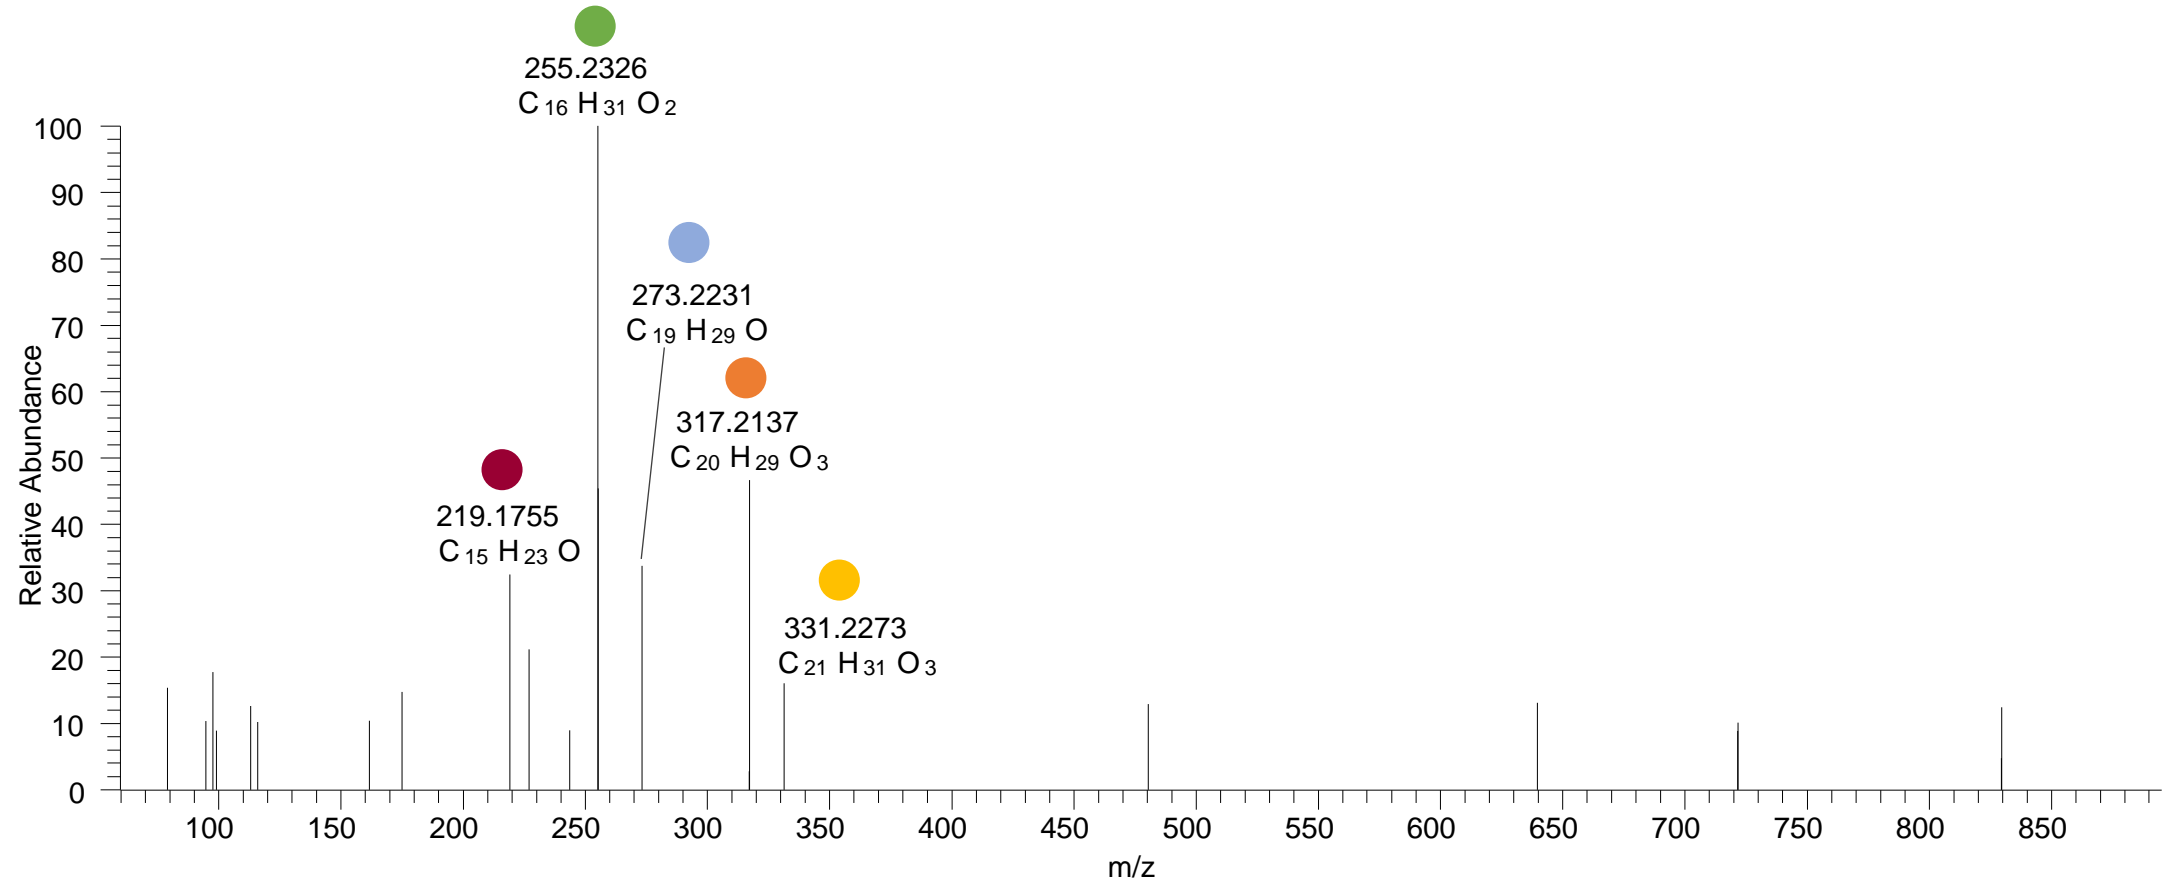

PC(18:1\_18:2<OOH>)  
PC(16:0\_20:3<OOH>)  
RT 13.8

[oxPC+HCOO]<sup>-</sup> XIC 860.5658 NL: 4.77E3

- Fragments containing oxFAs
- Fragments related to water loss
- Fragments not containing oxFAs
- Fragments containing methylated oxFAs
- Fragments related to CO<sub>2</sub> loss
- Position-specific fragments

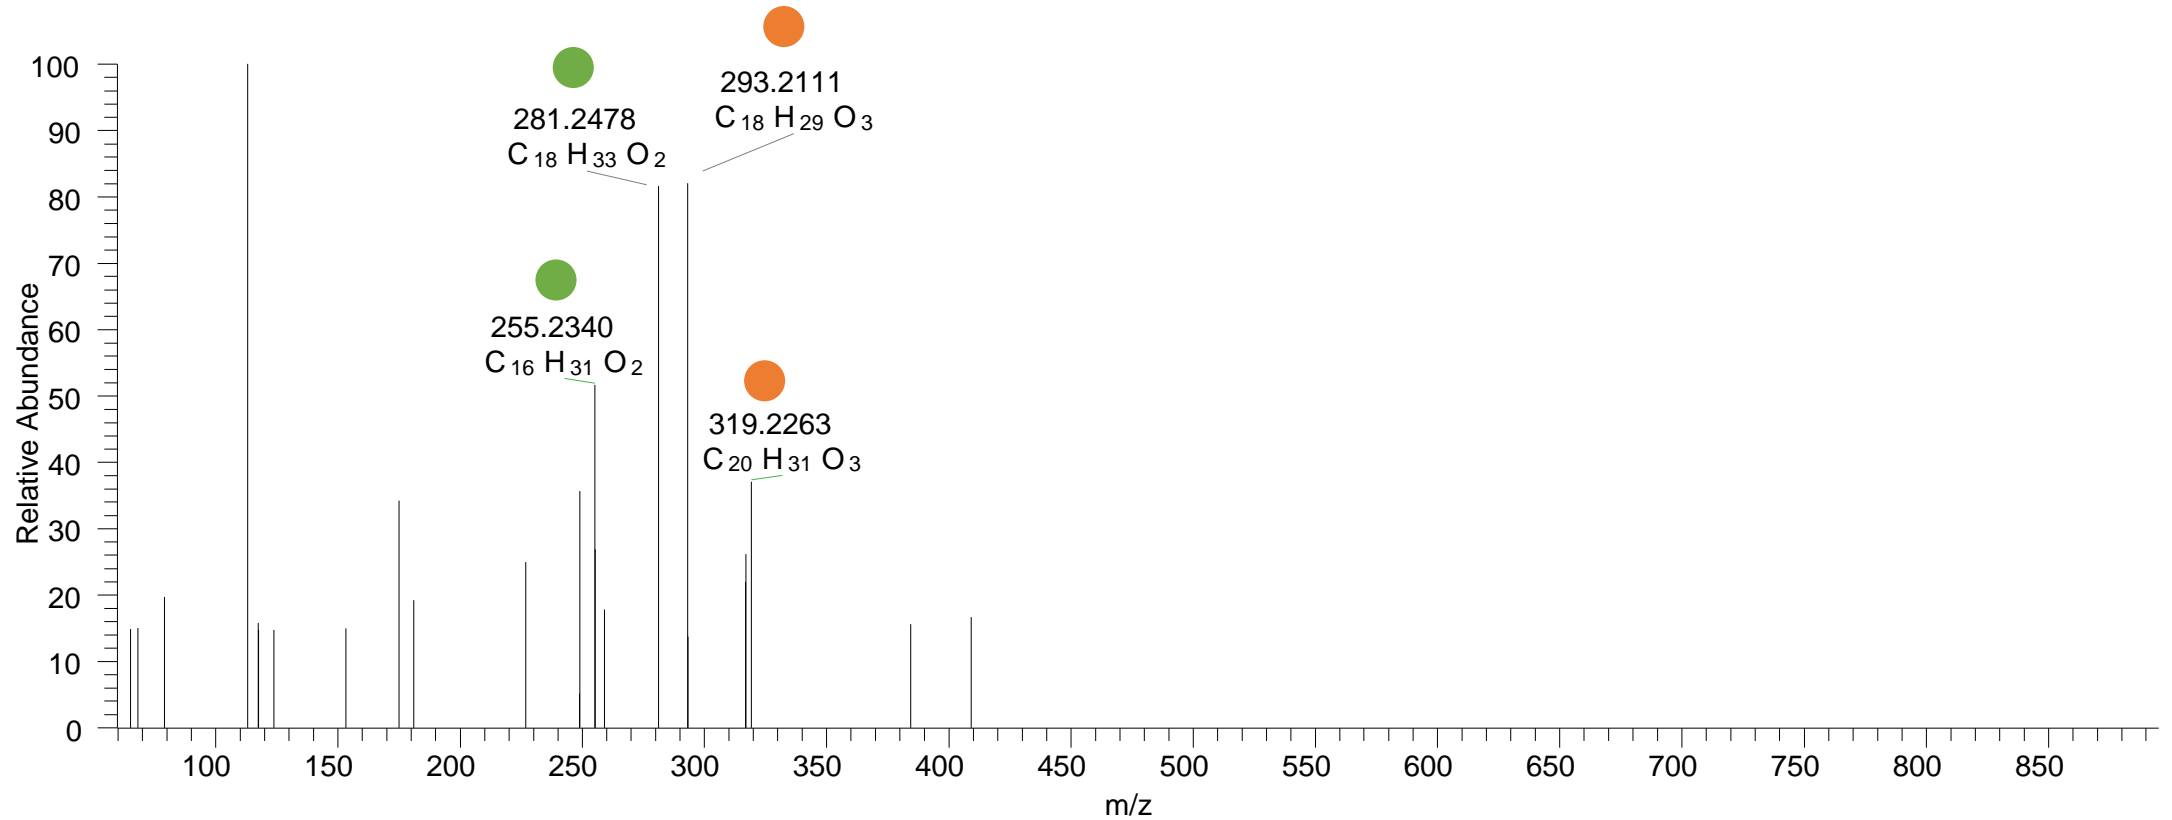

# PC(16:0\_20:3<OOH>)

[oxPC+HCOO]<sup>-</sup> XIC 860.5658 NL: 5.68E3

## RT 14.2

- Fragments containing oxFAs
- Fragments related to water loss
- Fragments not containing oxFAs
- Fragments containing methylated oxFAs
- Fragments related to CO<sub>2</sub> loss
- Position-specific fragments

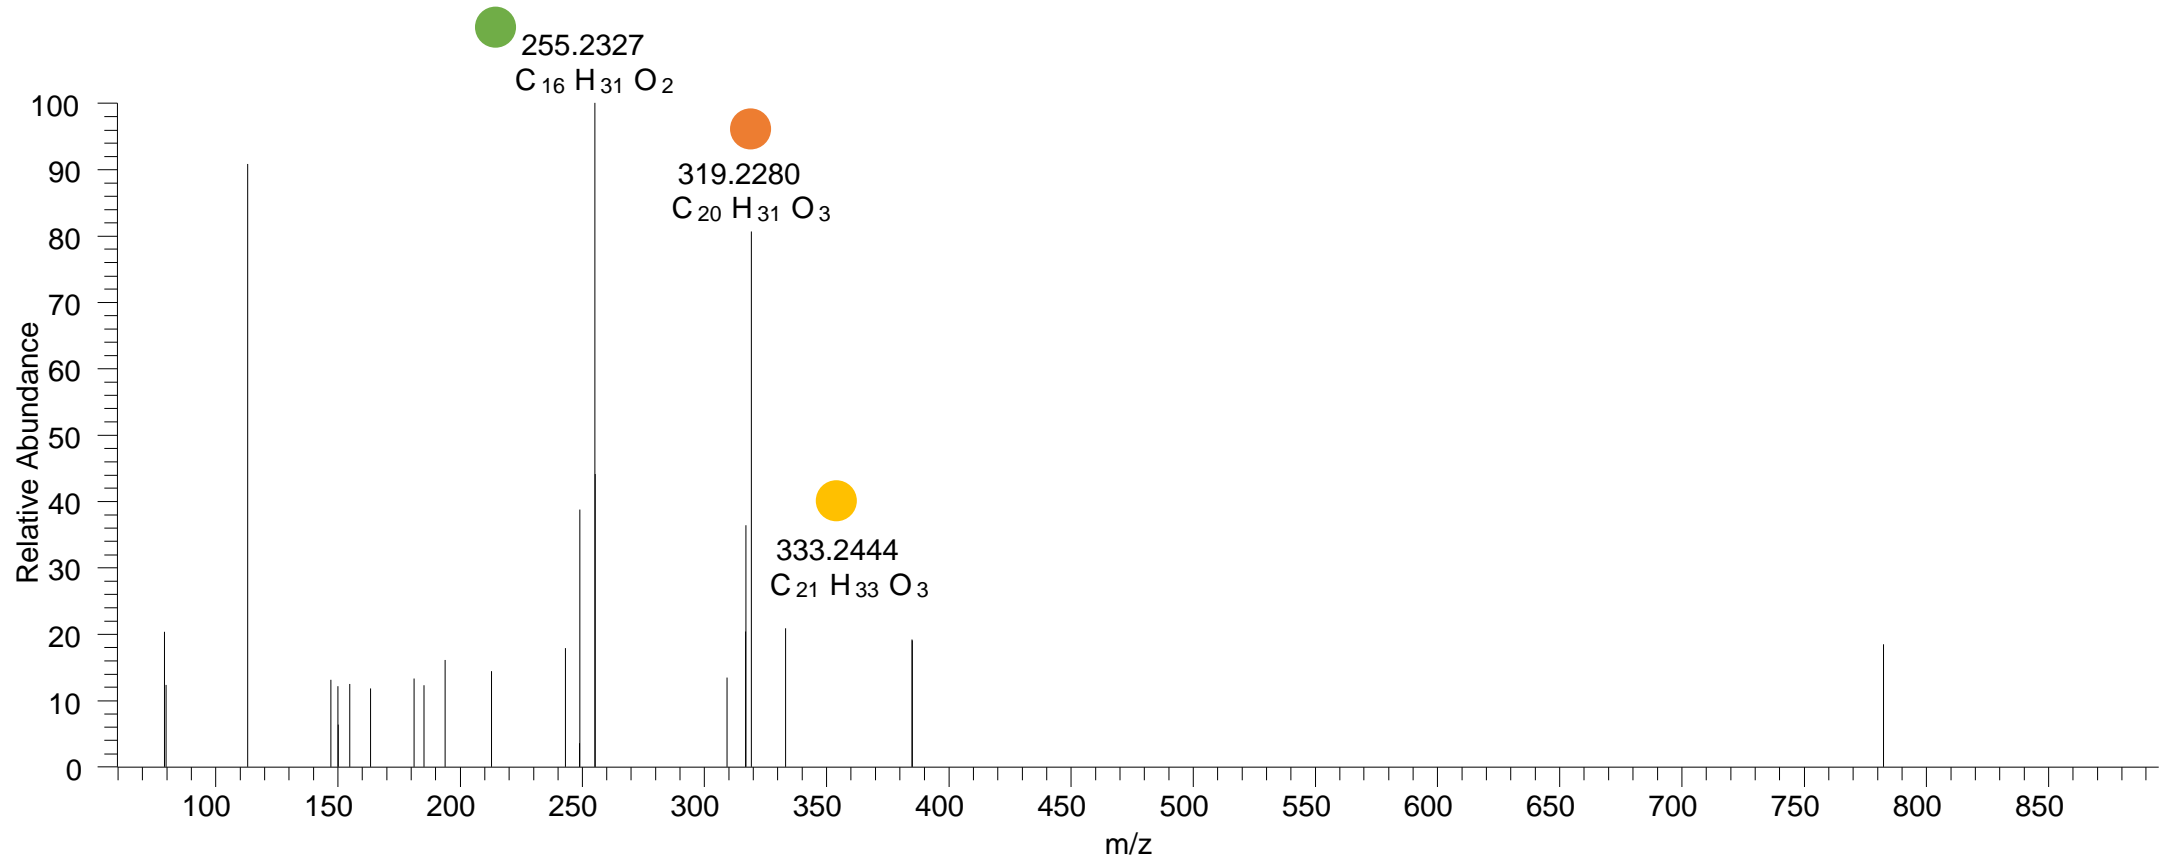

# PC(18:0\_18:2<OOH>)

[oxPC+HCOO]<sup>-</sup> XIC 862.5815 NL: 3.51E3

## RT 14.6

- Fragments containing oxFAs
- Fragments related to water loss
- Fragments not containing oxFAs
- Fragments containing methylated oxFAs
- Fragments related to CO<sub>2</sub> loss
- Position-specific fragments

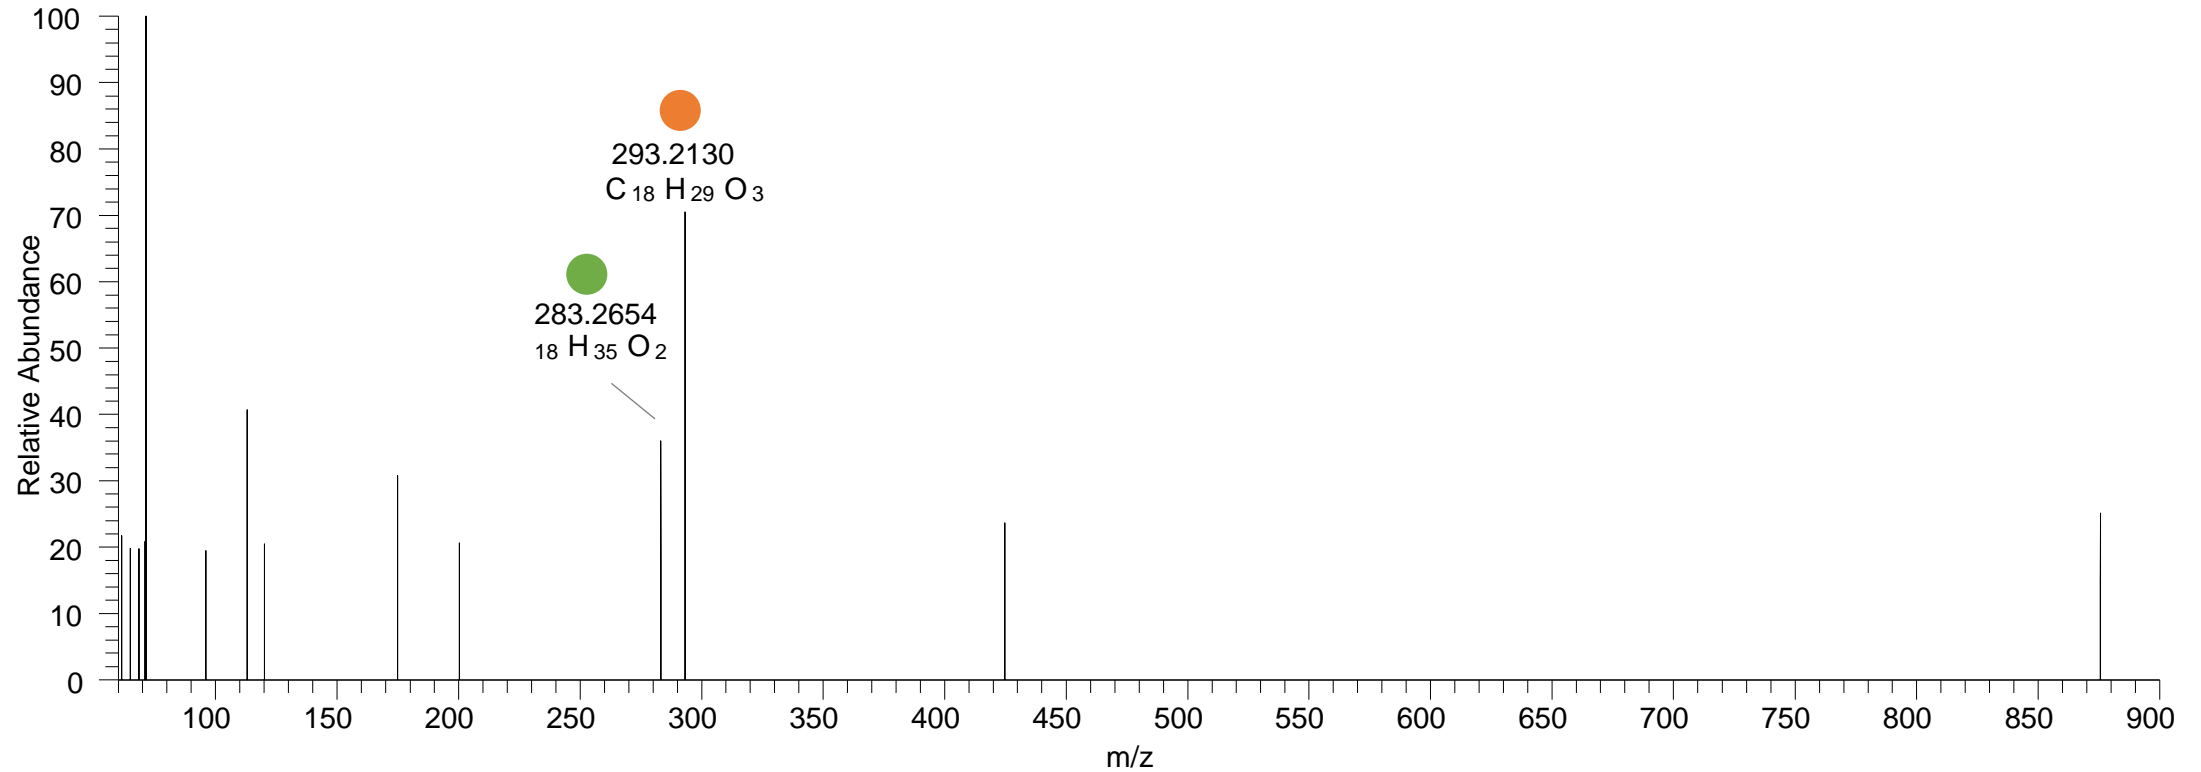

# PC(18:0\_18:2<OOH{13}>)

[oxPC+HCOO]<sup>-</sup> XIC 862.5815 NL: 7.63E2

## RT 15.1

- Fragments containing oxFAs
- Fragments related to water loss
- Fragments not containing oxFAs
- Fragments containing methylated oxFAs
- Fragments related to CO<sub>2</sub> loss
- Position-specific fragments

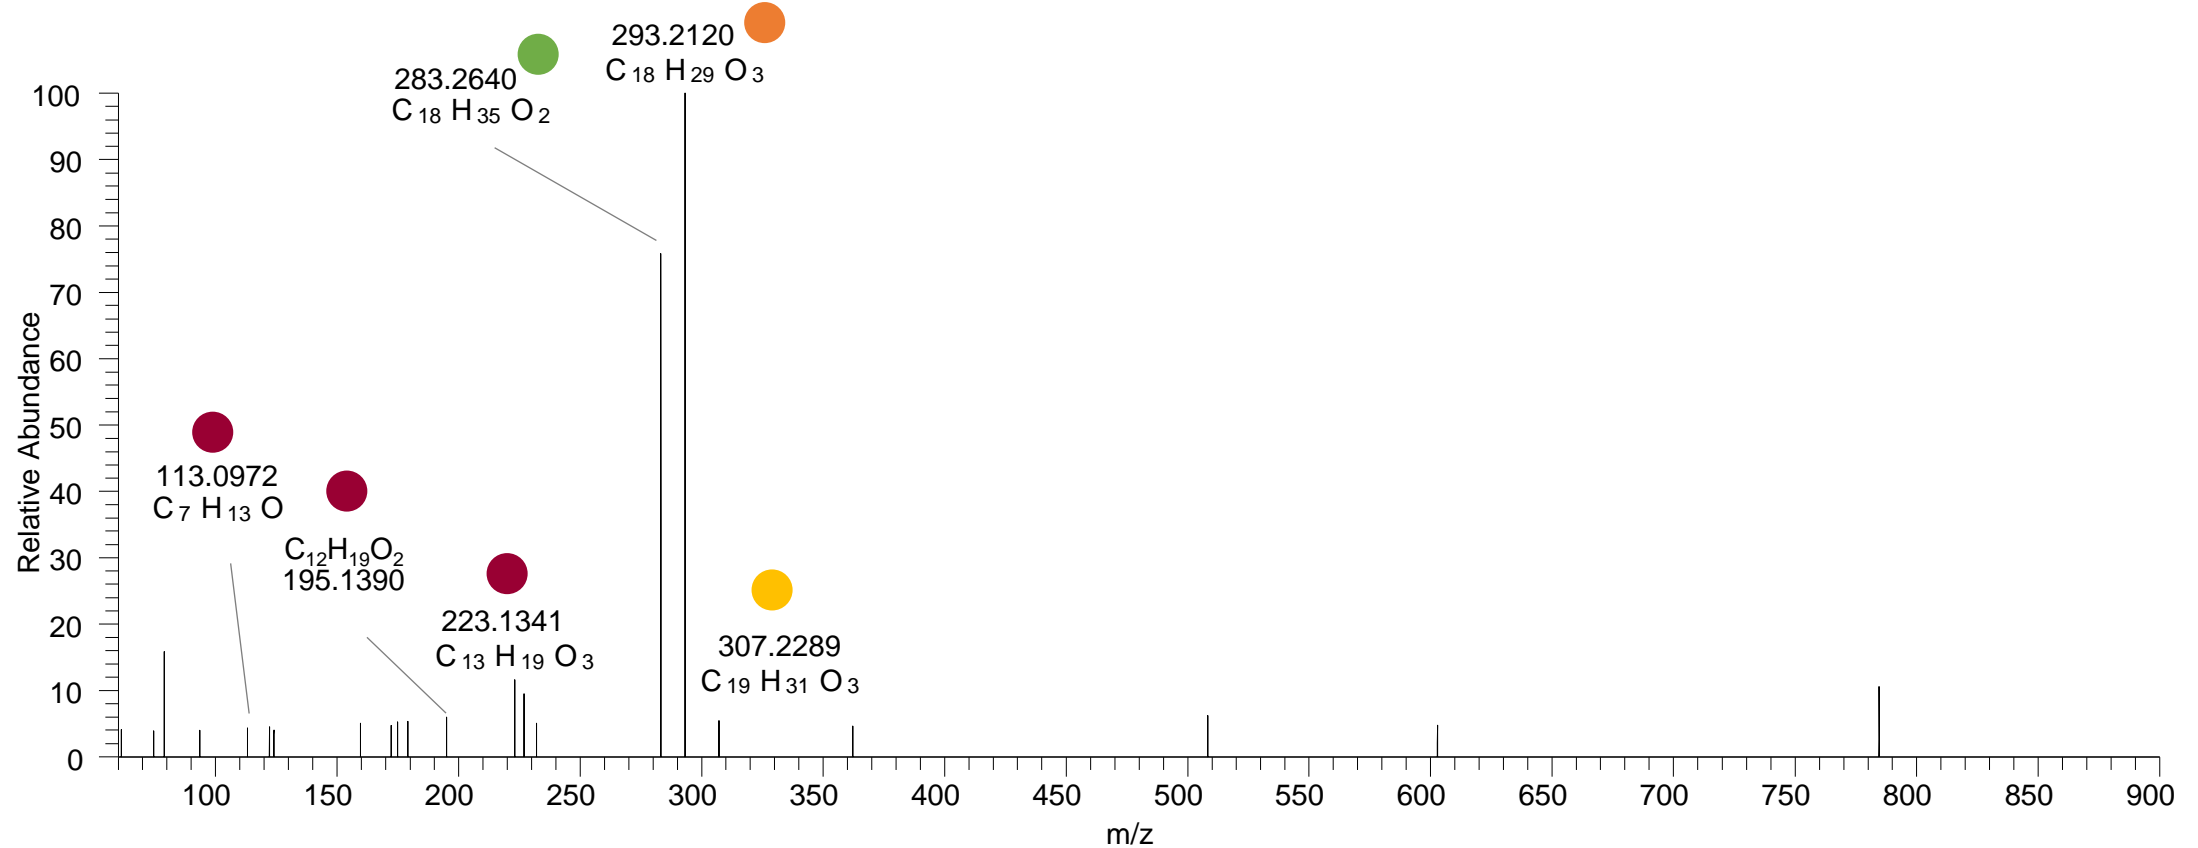

# PC(16:0\_22:6<O{16}>)

[oxPC+HCOO]<sup>-</sup> XIC 866.5553 NL: 1.08E4

## RT 13.5

- Fragments containing oxFAs
- Fragments related to water loss
- Fragments not containing oxFAs
- Fragments containing methylated oxFAs
- Fragments related to CO<sub>2</sub> loss
- Position-specific fragments

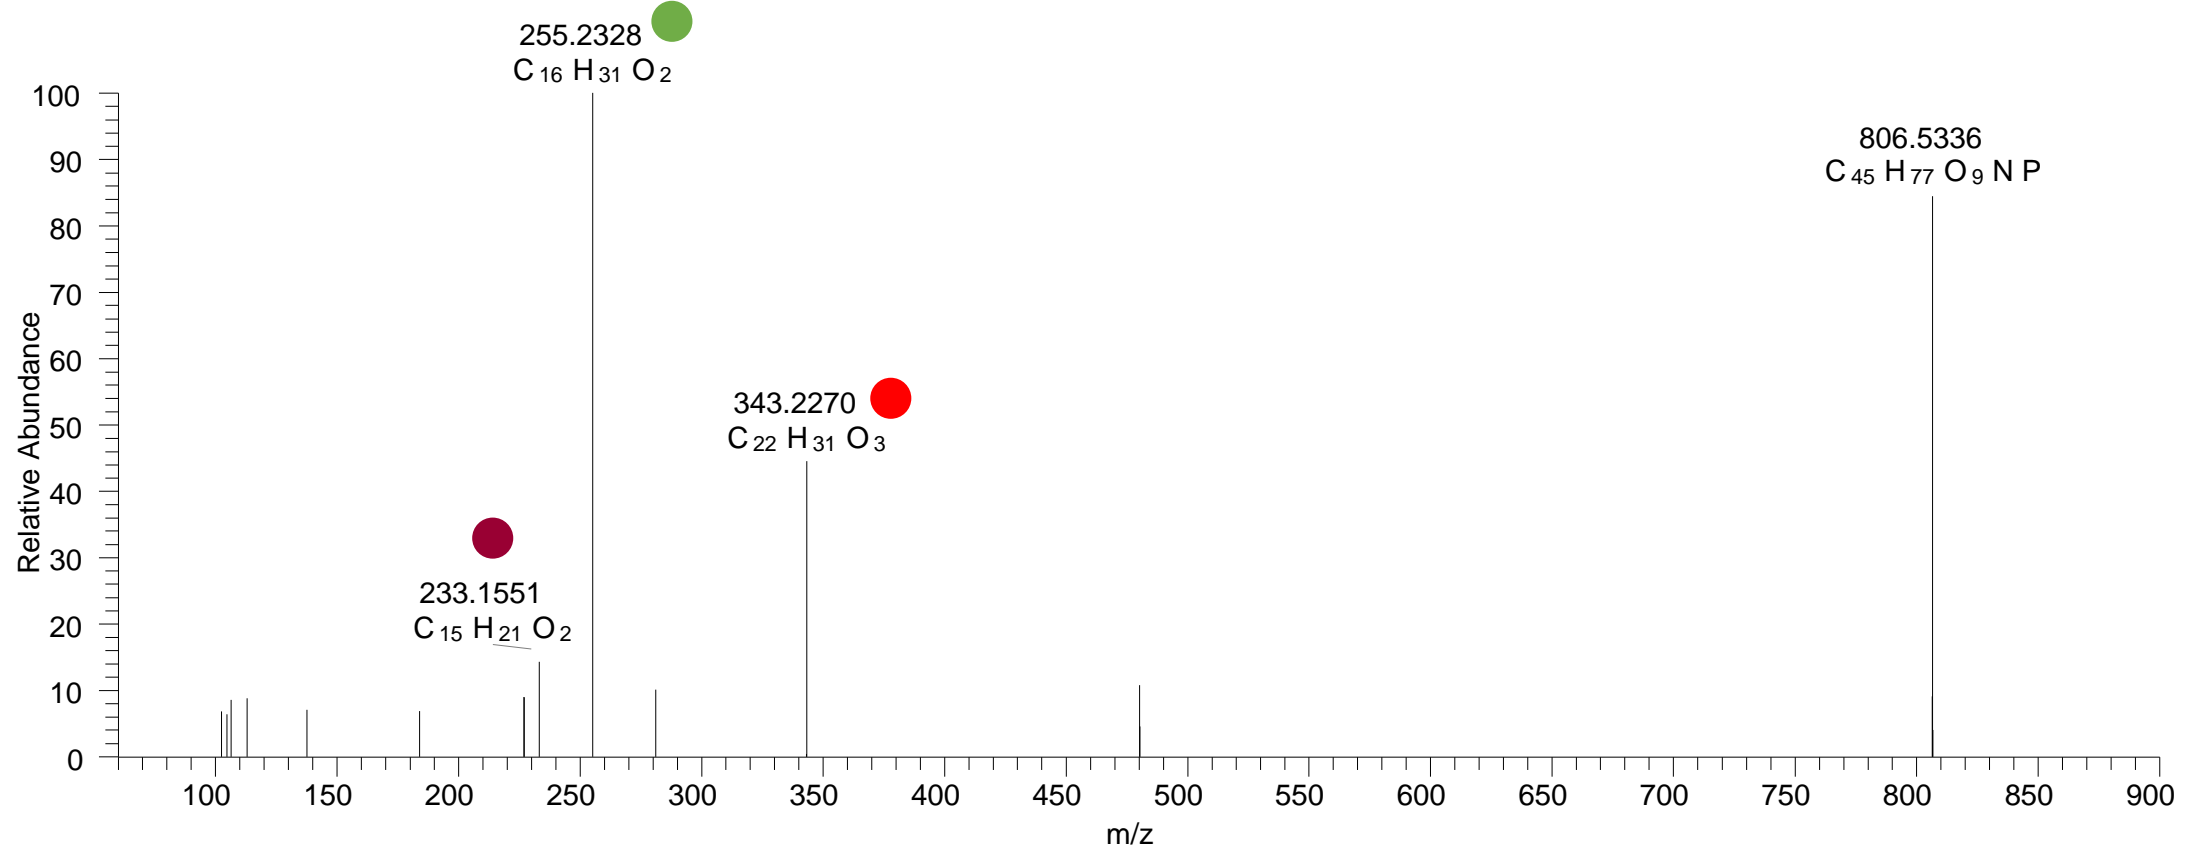



# PC(16:0\_22:5<ep{7-8}>)

[oxPC+HCOO]<sup>-</sup> XIC 866.5553 NL: 8.08E3

## RT 14.5

- Fragments containing oxFAs
- Fragments related to water loss
- Fragments not containing oxFAs
- Fragments containing methylated oxFAs
- Fragments related to CO<sub>2</sub> loss
- Position-specific fragments

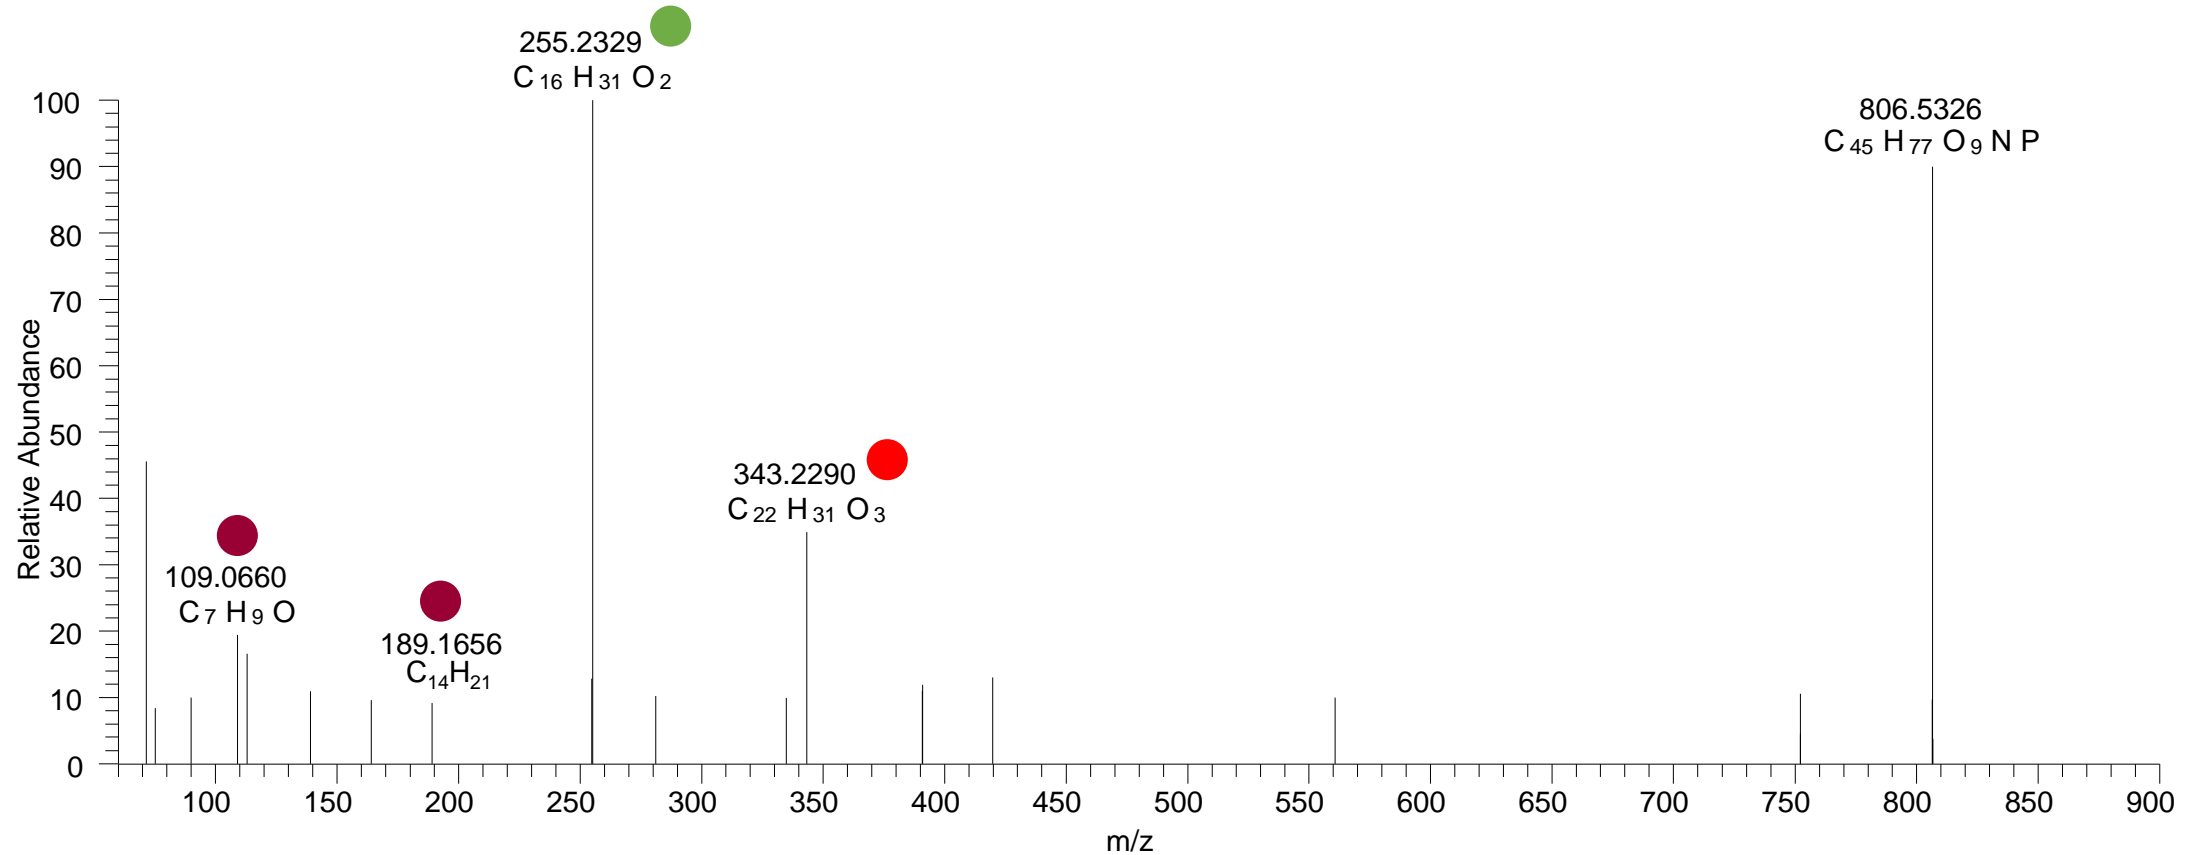

# PC(16:0\_22:5<OH>)

[oxPC+HCOO]<sup>-</sup> XIC 868.5709 NL: 3.96E3

## RT 13.7

- Fragments containing oxFAs
- Fragments related to water loss
- Fragments not containing oxFAs
- Fragments containing methylated oxFAs
- Fragments related to CO<sub>2</sub> loss
- Position-specific fragments

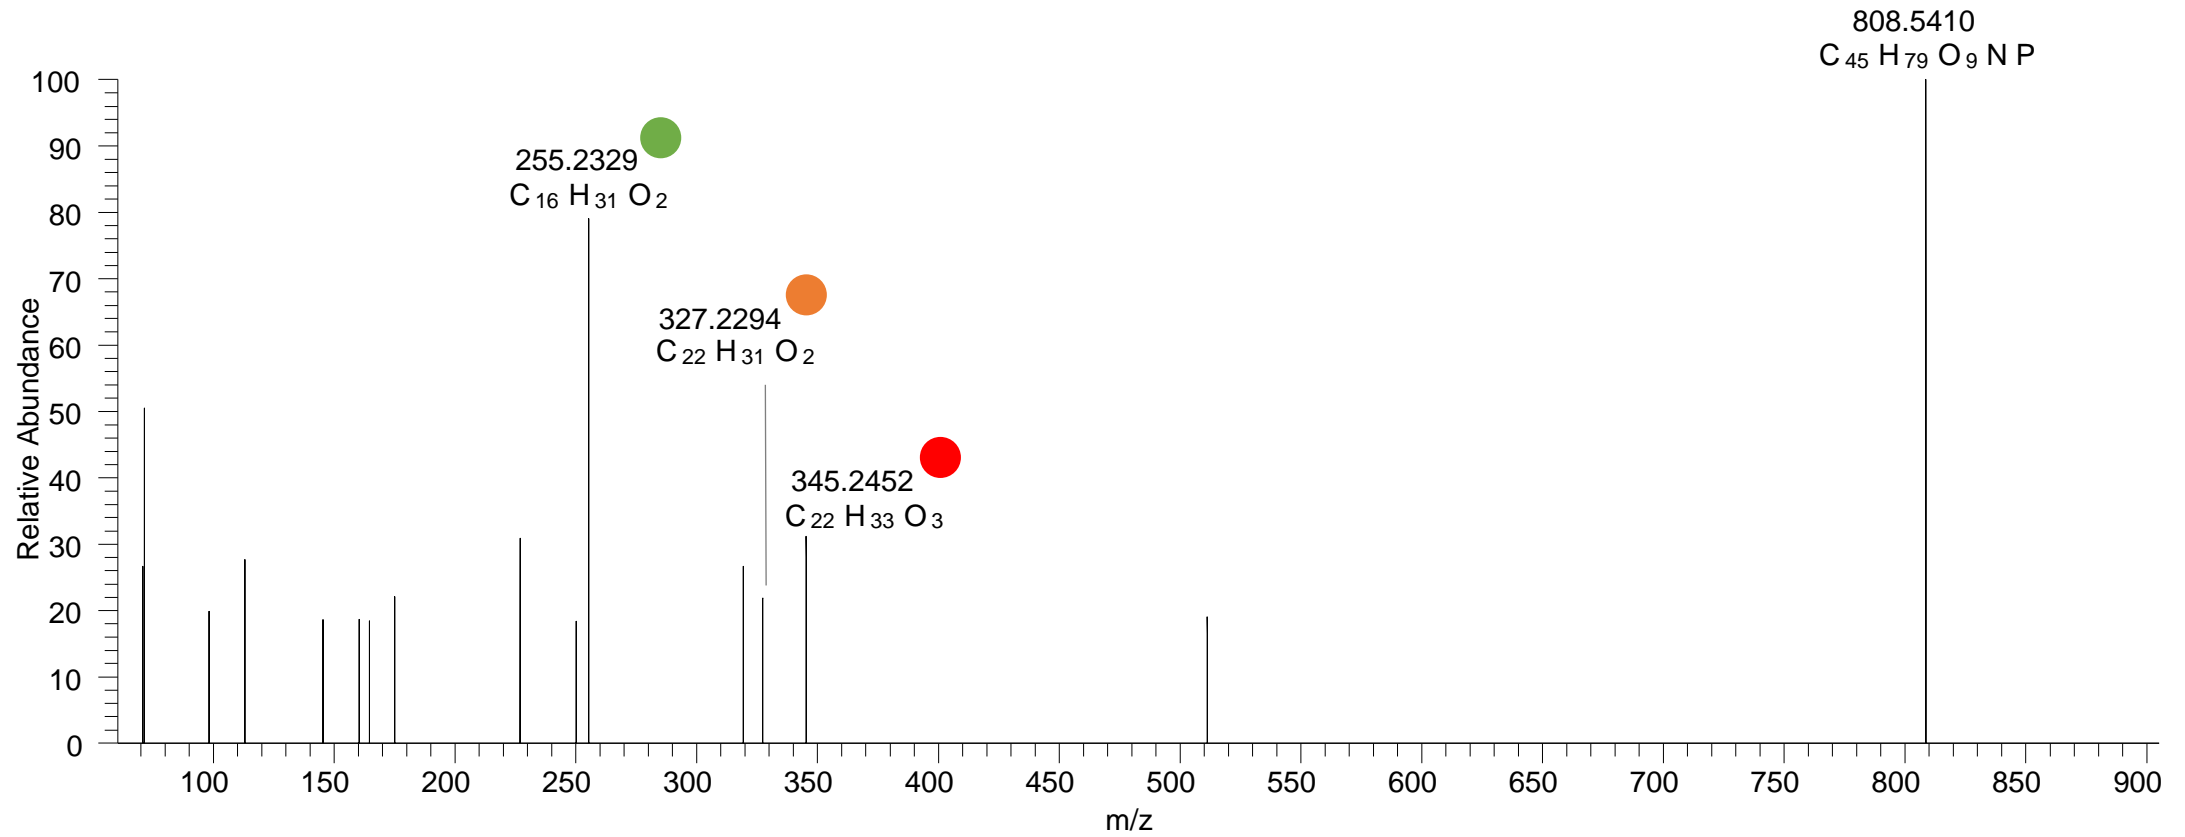

PC(16:0\_22:5<OH>)

[oxPC+HCOO]<sup>-</sup> XIC 868.5709 NL: 8.32E3

PC(18:1\_20:4<O>)

RT 13.8-14.5

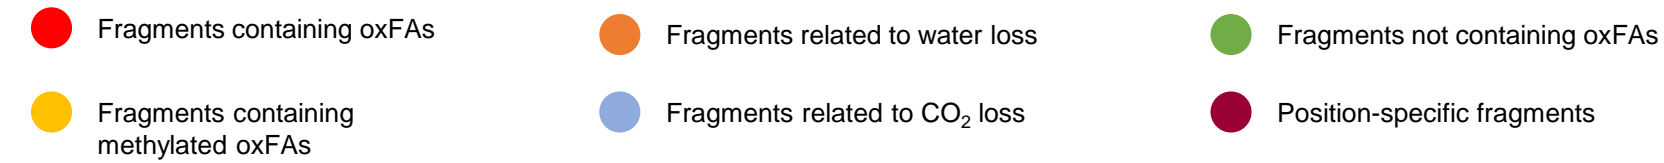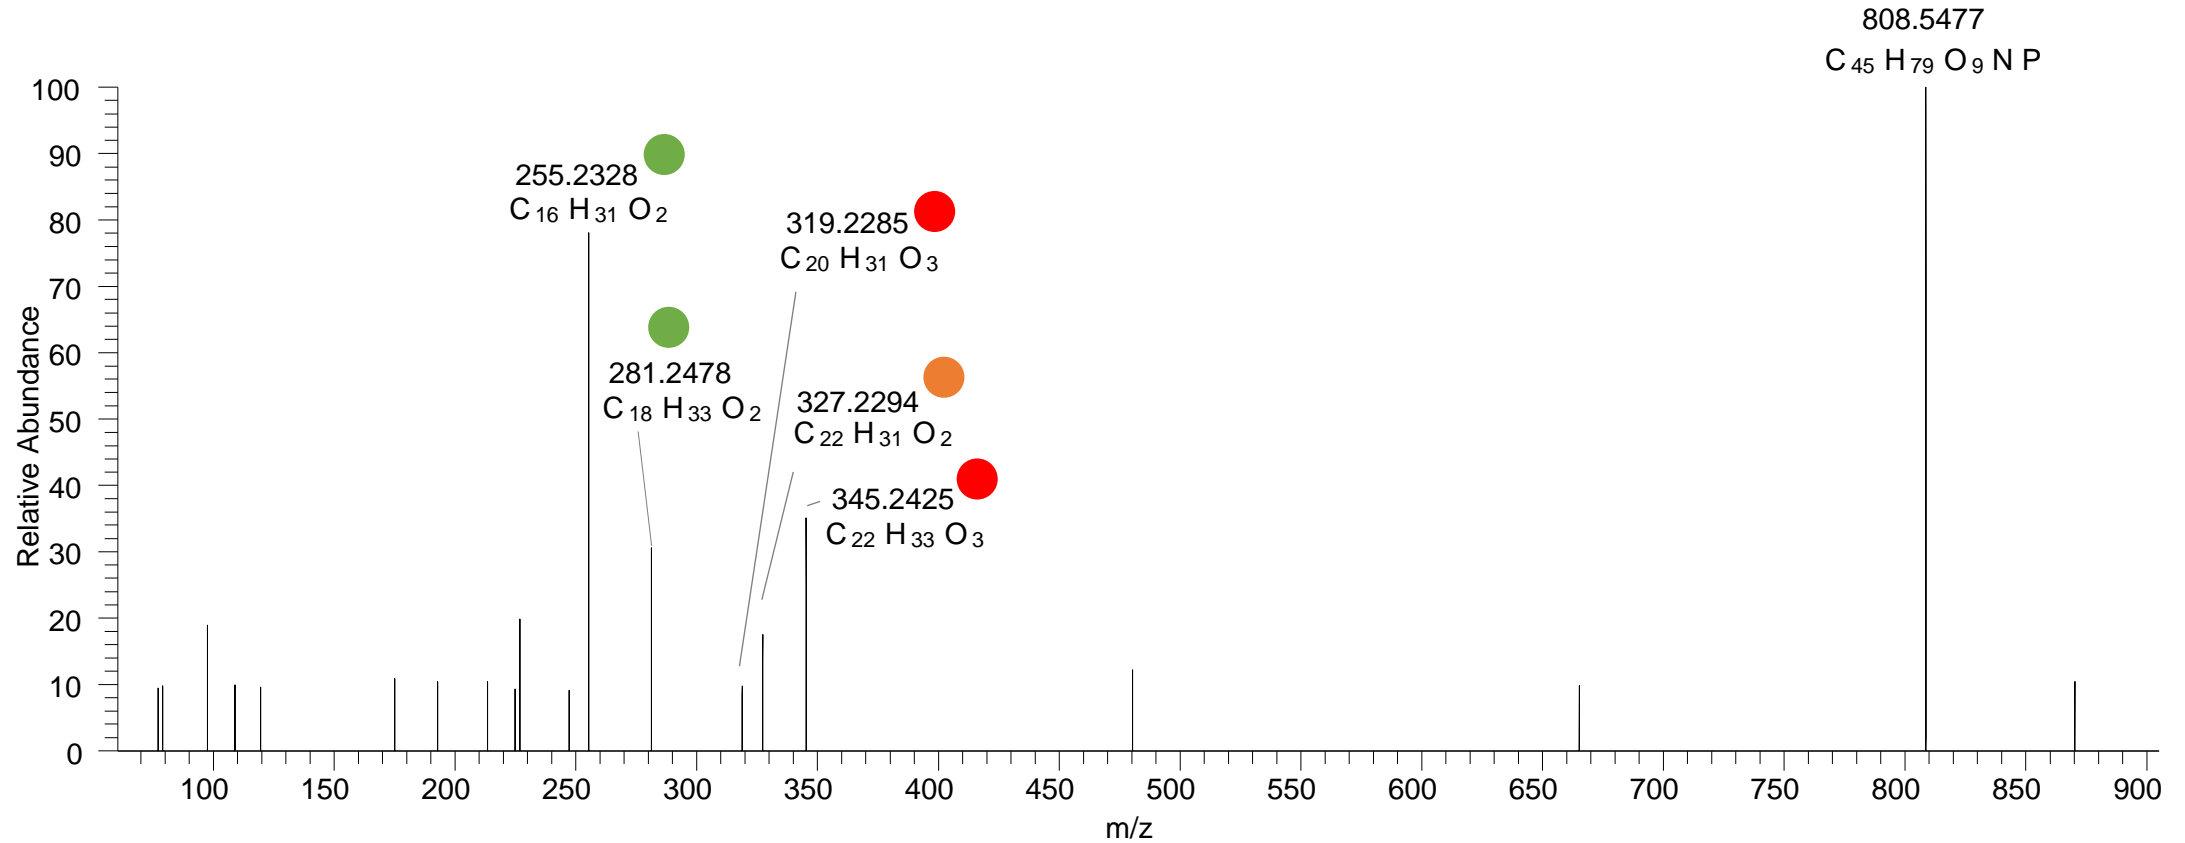

PC(18:0\_20:5<O>)  
PC(18:1\_20:4<O>)  
RT 14.7-15.0

[oxPC+HCOO]<sup>-</sup> XIC 868.5709 NL: 3.85E3

- Fragments containing oxFAs
- Fragments related to water loss
- Fragments not containing oxFAs
- Fragments containing methylated oxFAs
- Fragments related to CO<sub>2</sub> loss
- Position-specific fragments

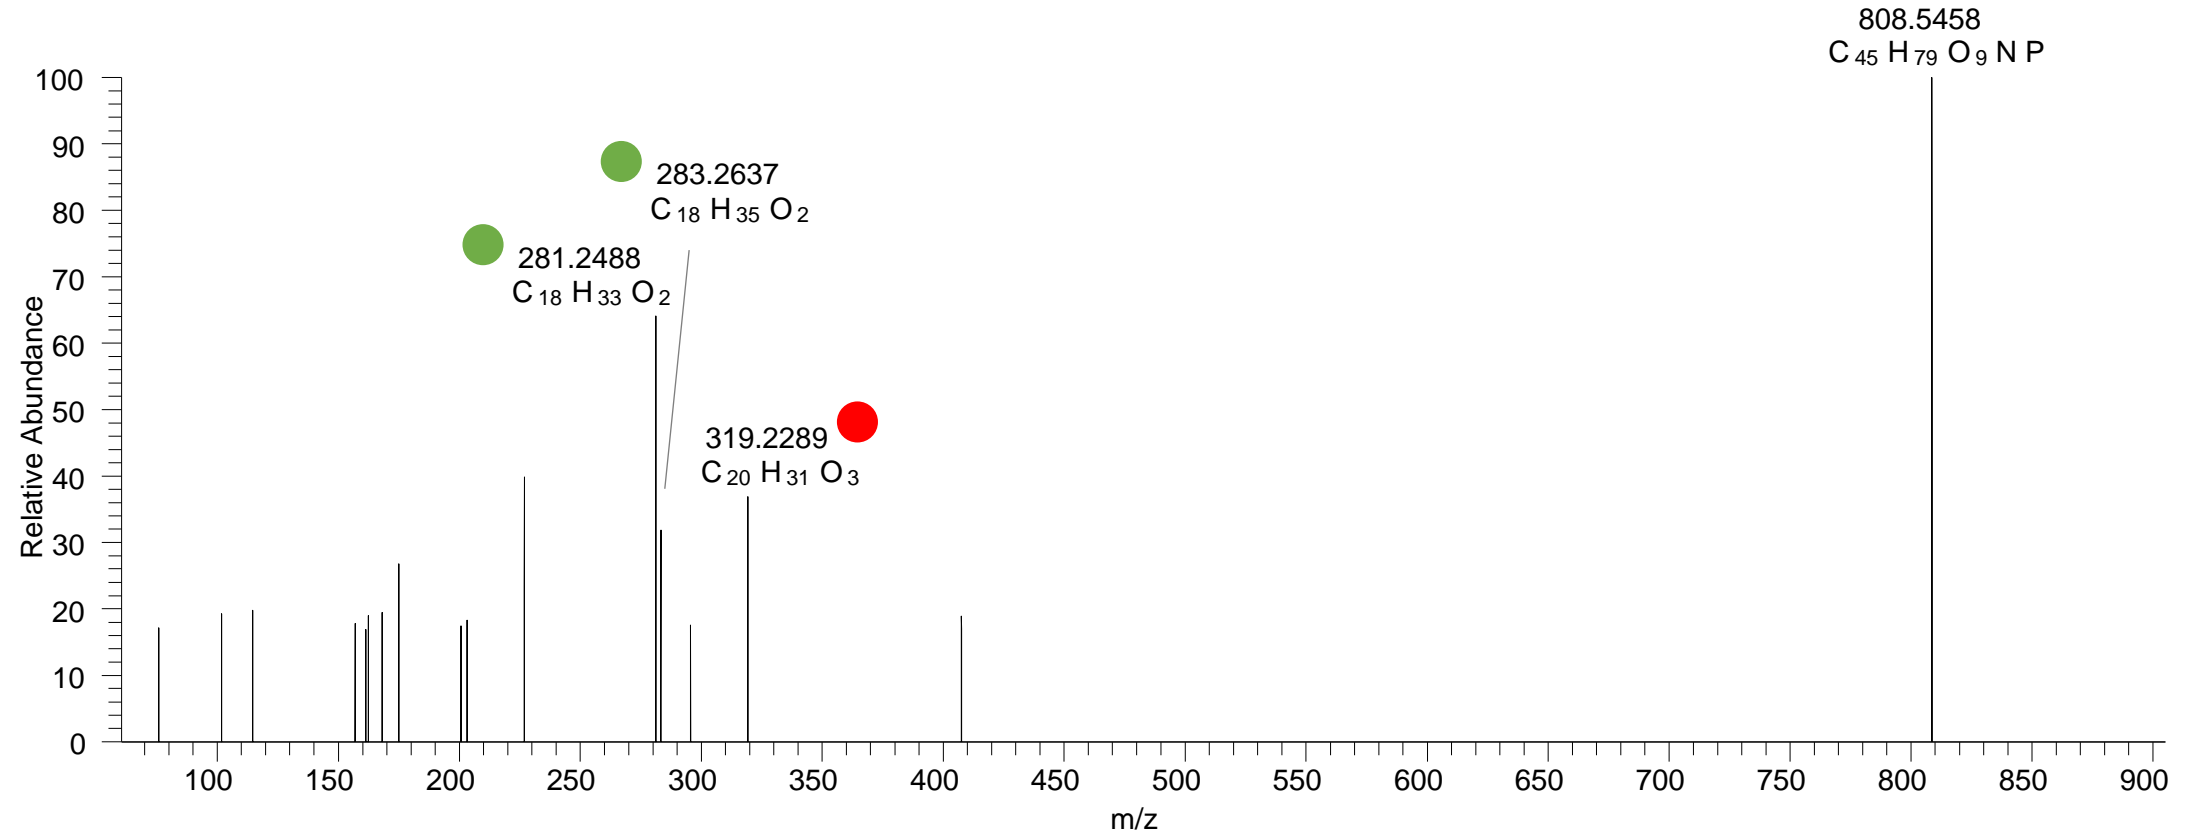

# PC(18:1\_20:3<O>)

[oxPC+HCOO]<sup>-</sup> XIC 870.5866 NL: 5.48E3

## RT 14.4

- Fragments containing oxFAs
- Fragments related to water loss
- Fragments not containing oxFAs
- Fragments containing methylated oxFAs
- Fragments related to CO<sub>2</sub> loss
- Position-specific fragments

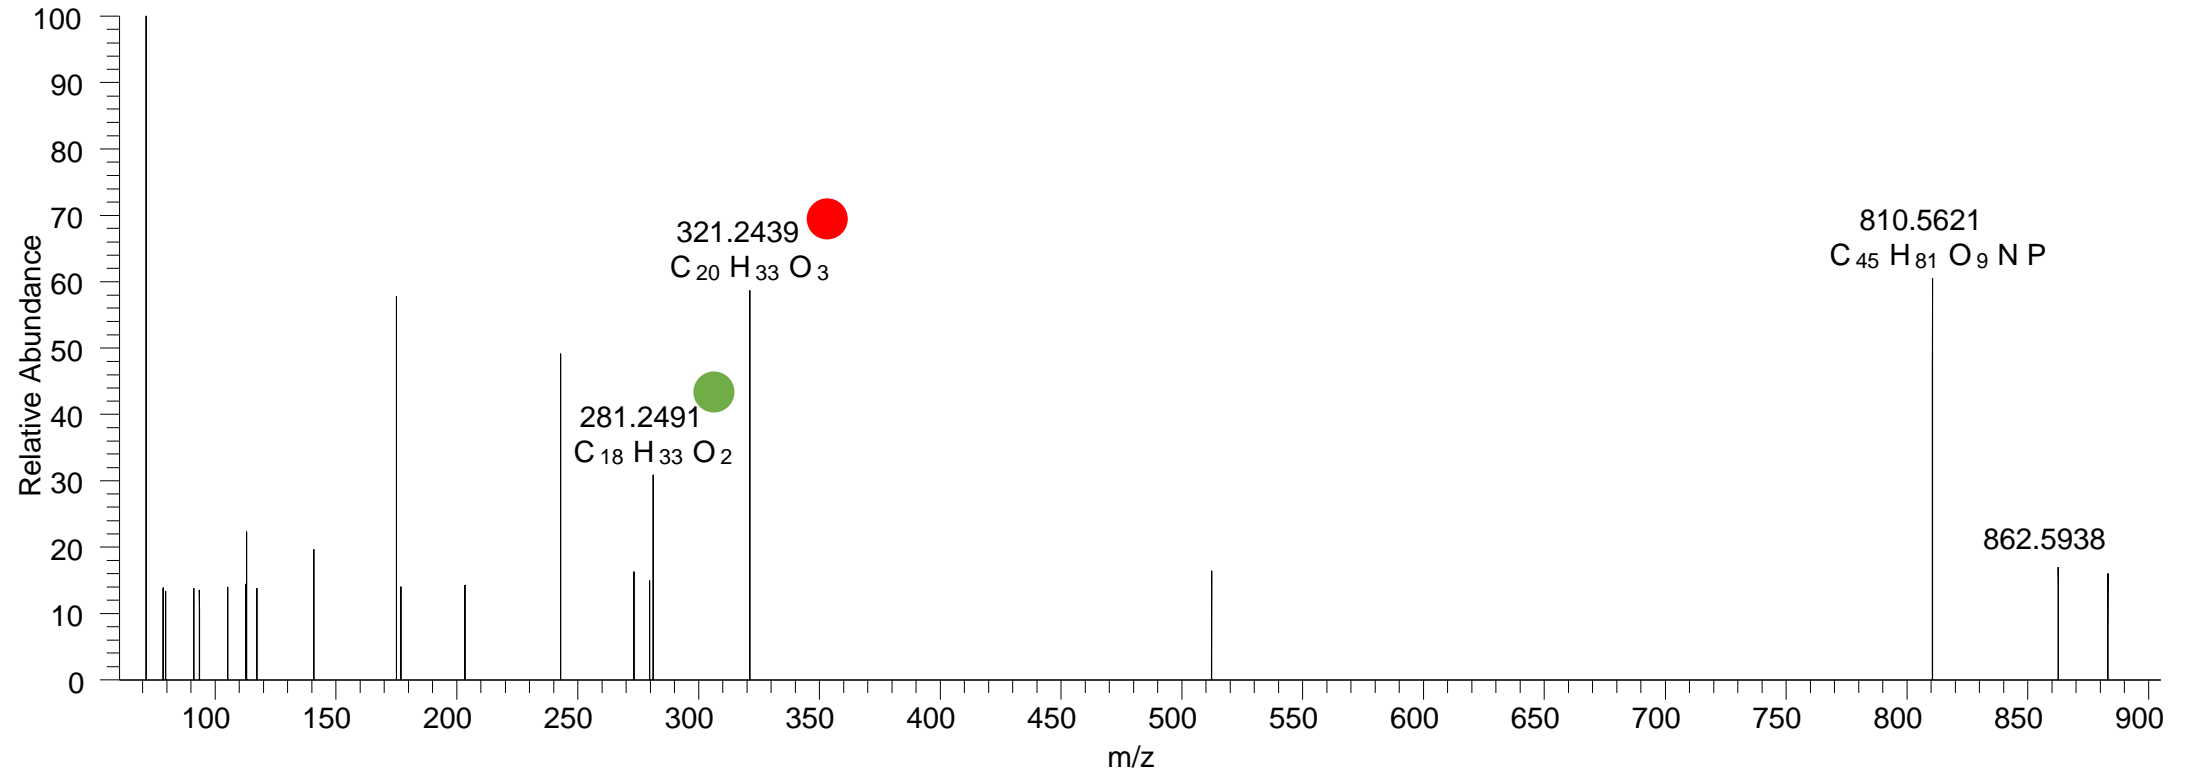

# PC(18:0\_20:4<OH>)

[oxPC+HCOO]<sup>-</sup> XIC 870.5866 NL: 8.66E3

## RT 15.3

- Fragments containing oxFAs
- Fragments related to water loss
- Fragments not containing oxFAs
- Fragments containing methylated oxFAs
- Fragments related to CO<sub>2</sub> loss
- Position-specific fragments

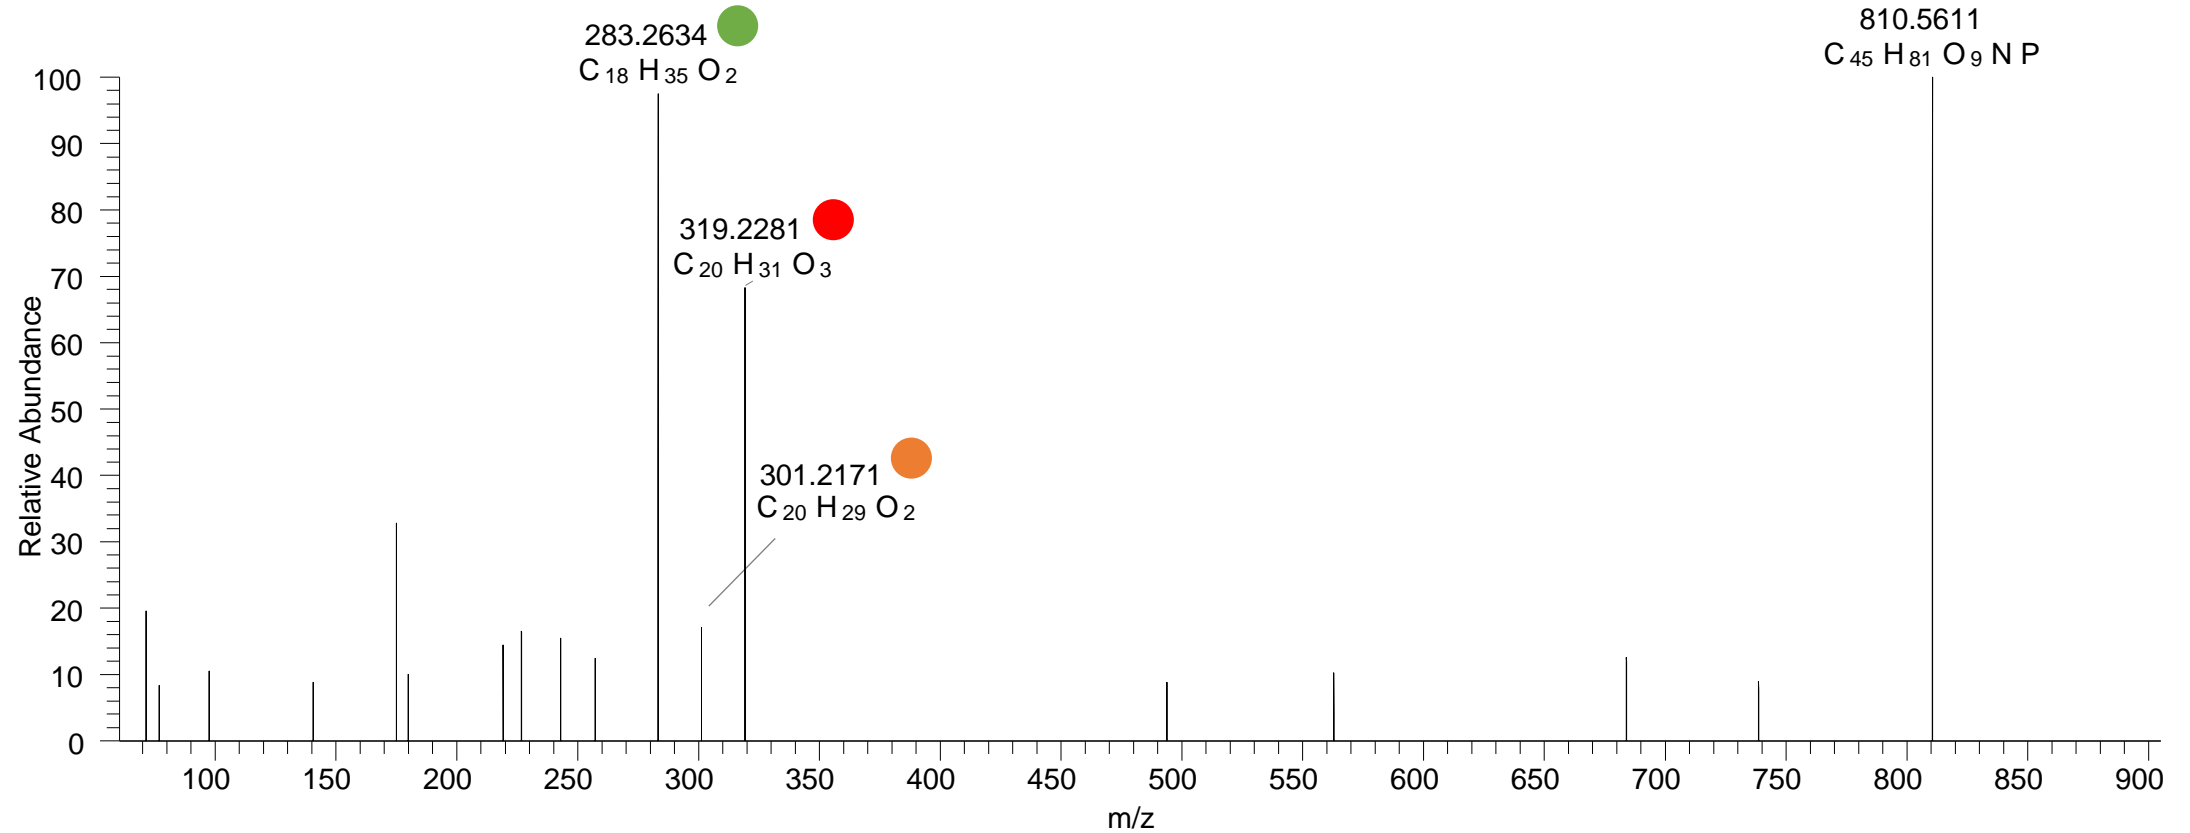

# PC(18:0\_20:4<OH{11}>)

[oxPC+HCOO]- XIC 870.5866 NL: 1.24E4

## RT 15.7

- Fragments containing oxFAs
- Fragments related to water loss
- Fragments not containing oxFAs
- Fragments containing methylated oxFAs
- Fragments related to CO<sub>2</sub> loss
- Position-specific fragments

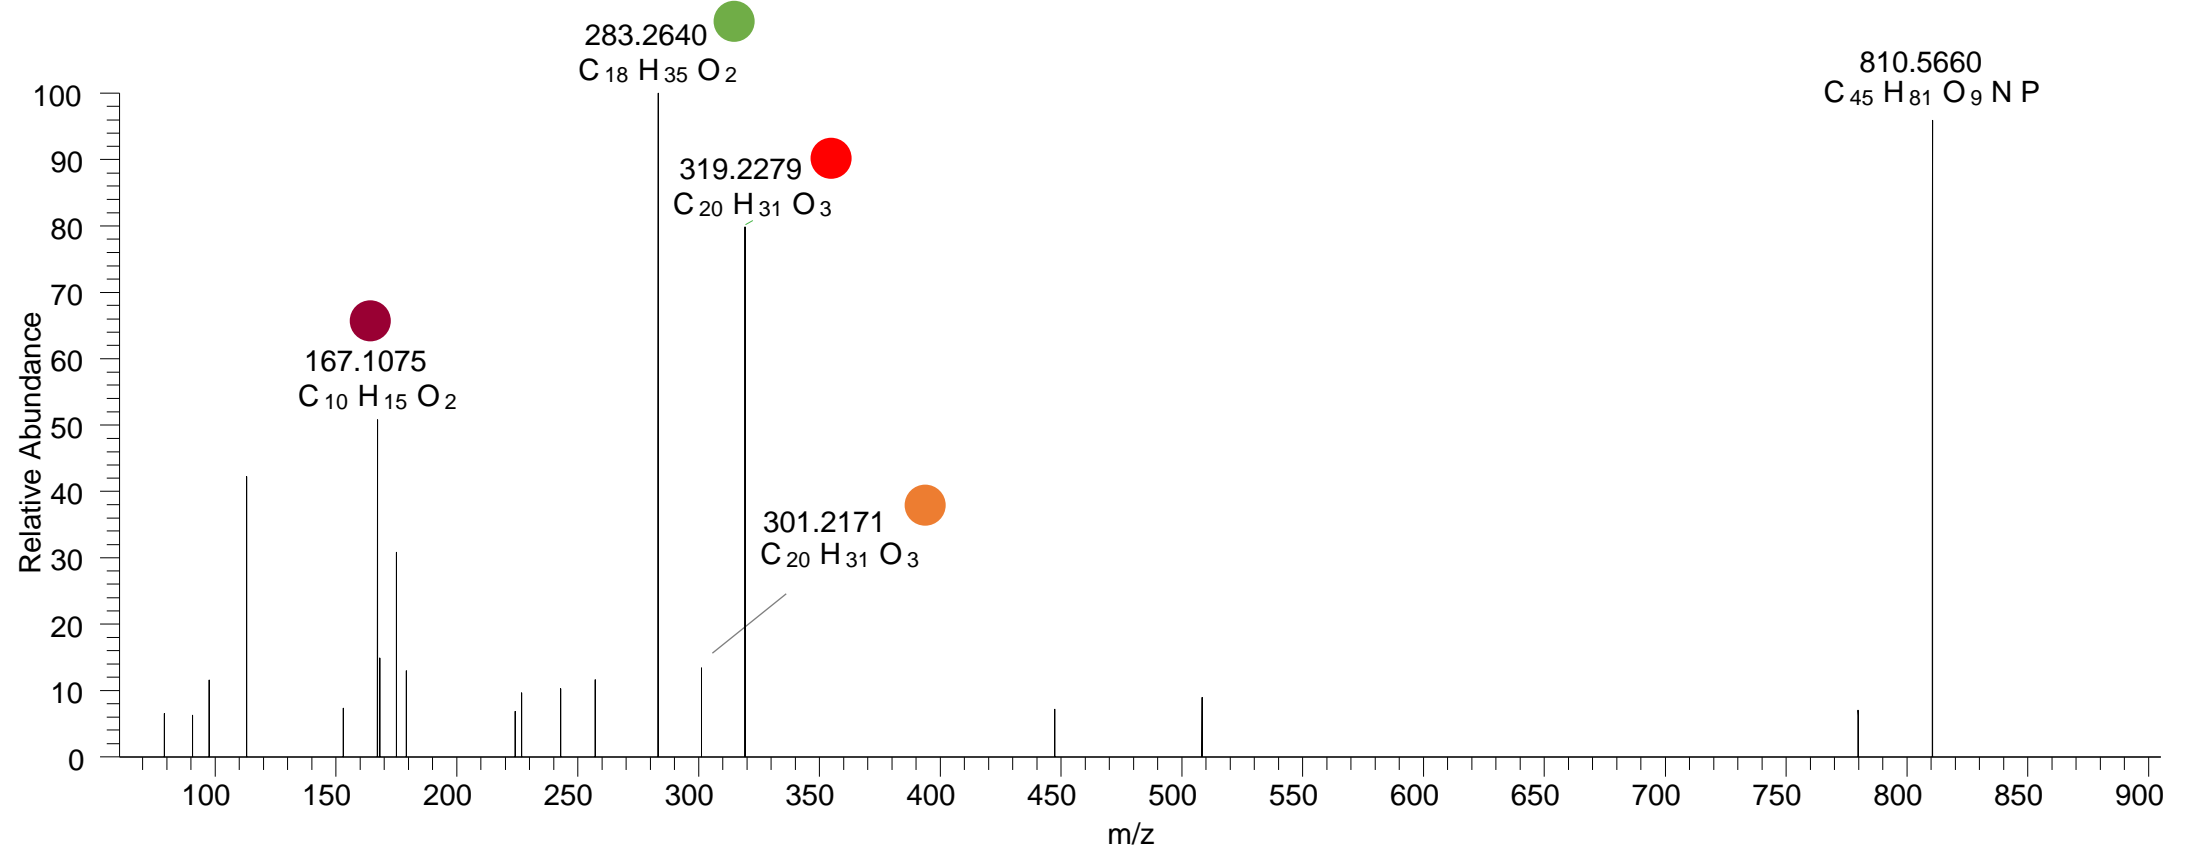

# PC(18:0\_20:4<OH{8}>) PC(18:0\_20:4<OH{9}>) RT 16.2

[oxPC+HCOO]<sup>-</sup> XIC 870.5866 NL: 1.87E4

- Fragments containing oxFAs
- Fragments related to water loss
- Fragments not containing oxFAs
- Fragments containing methylated oxFAs
- Fragments related to CO<sub>2</sub> loss
- Position-specific fragments

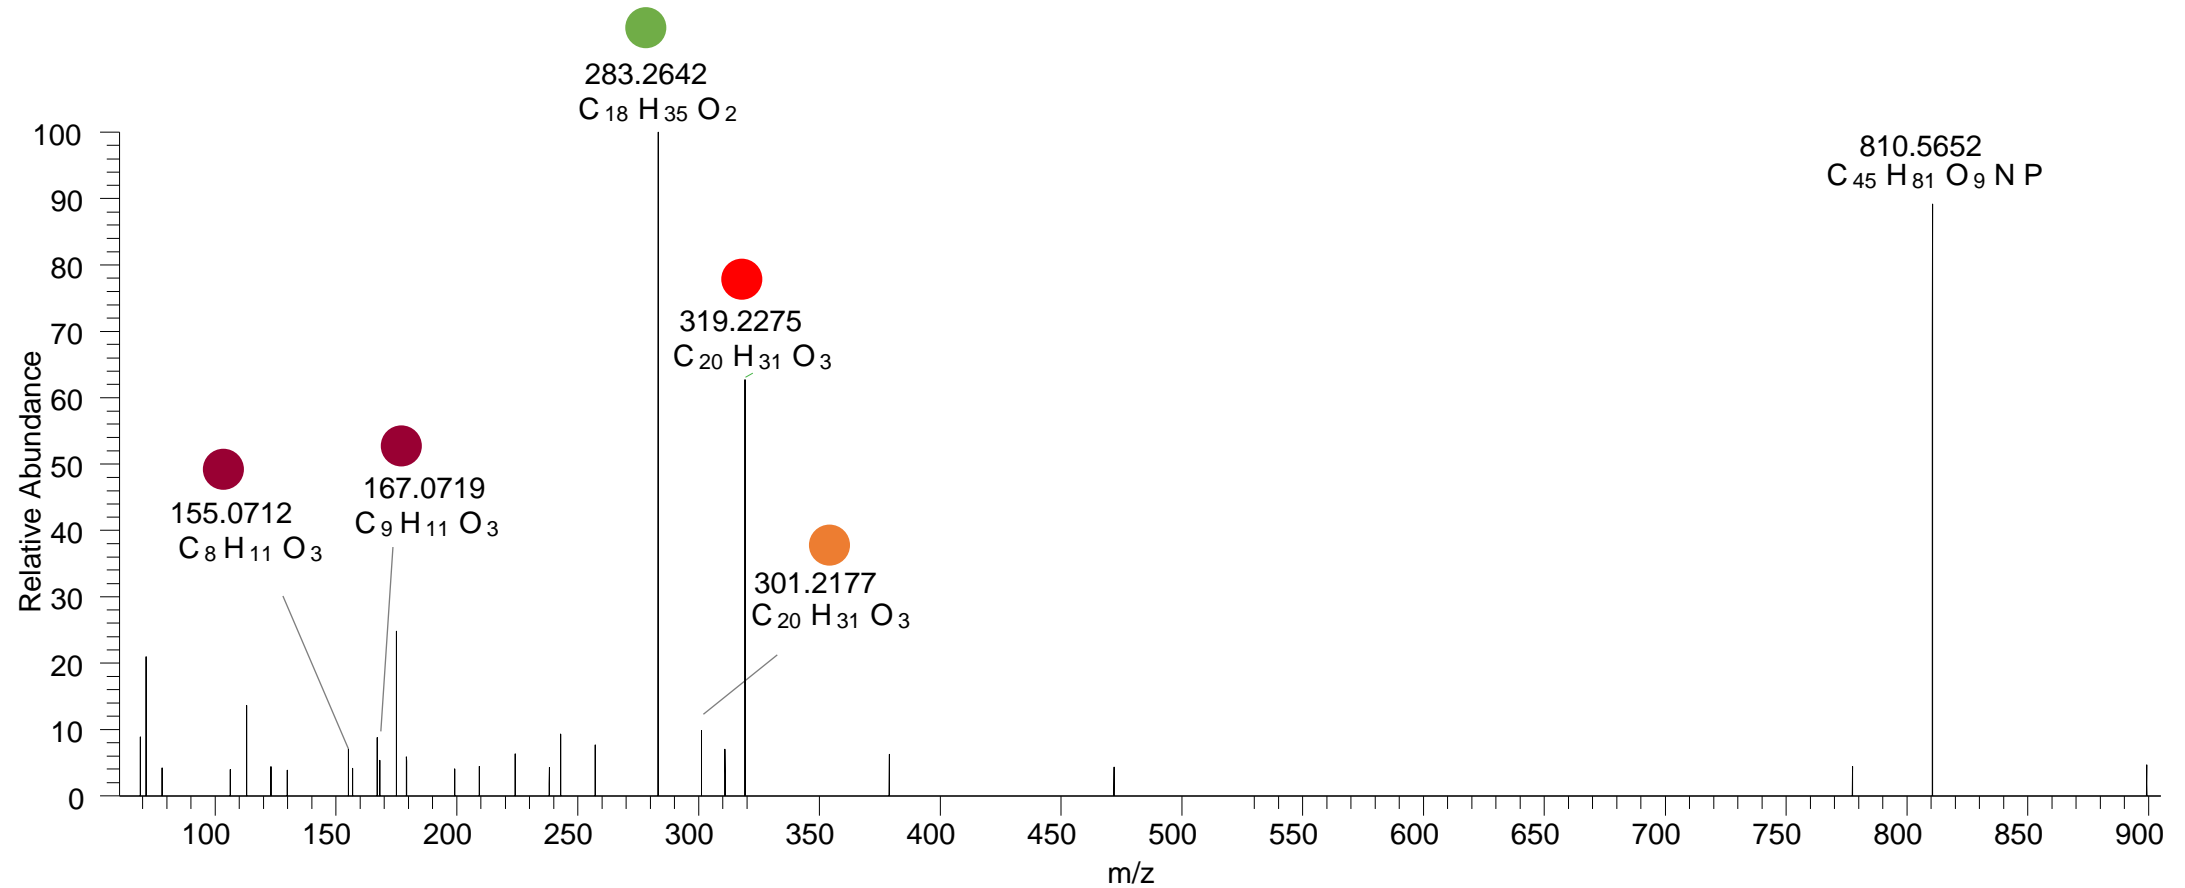



# PC(16:0\_22:6<2O>)

[oxPC+HCOO]<sup>-</sup> XIC 882.5502 NL: 2.46E3

## RT 10.8-14.4

- Fragments containing oxFAs
- Fragments related to water loss
- Fragments not containing oxFAs
- Fragments containing methylated oxFAs
- Fragments related to CO<sub>2</sub> loss
- Position-specific fragments

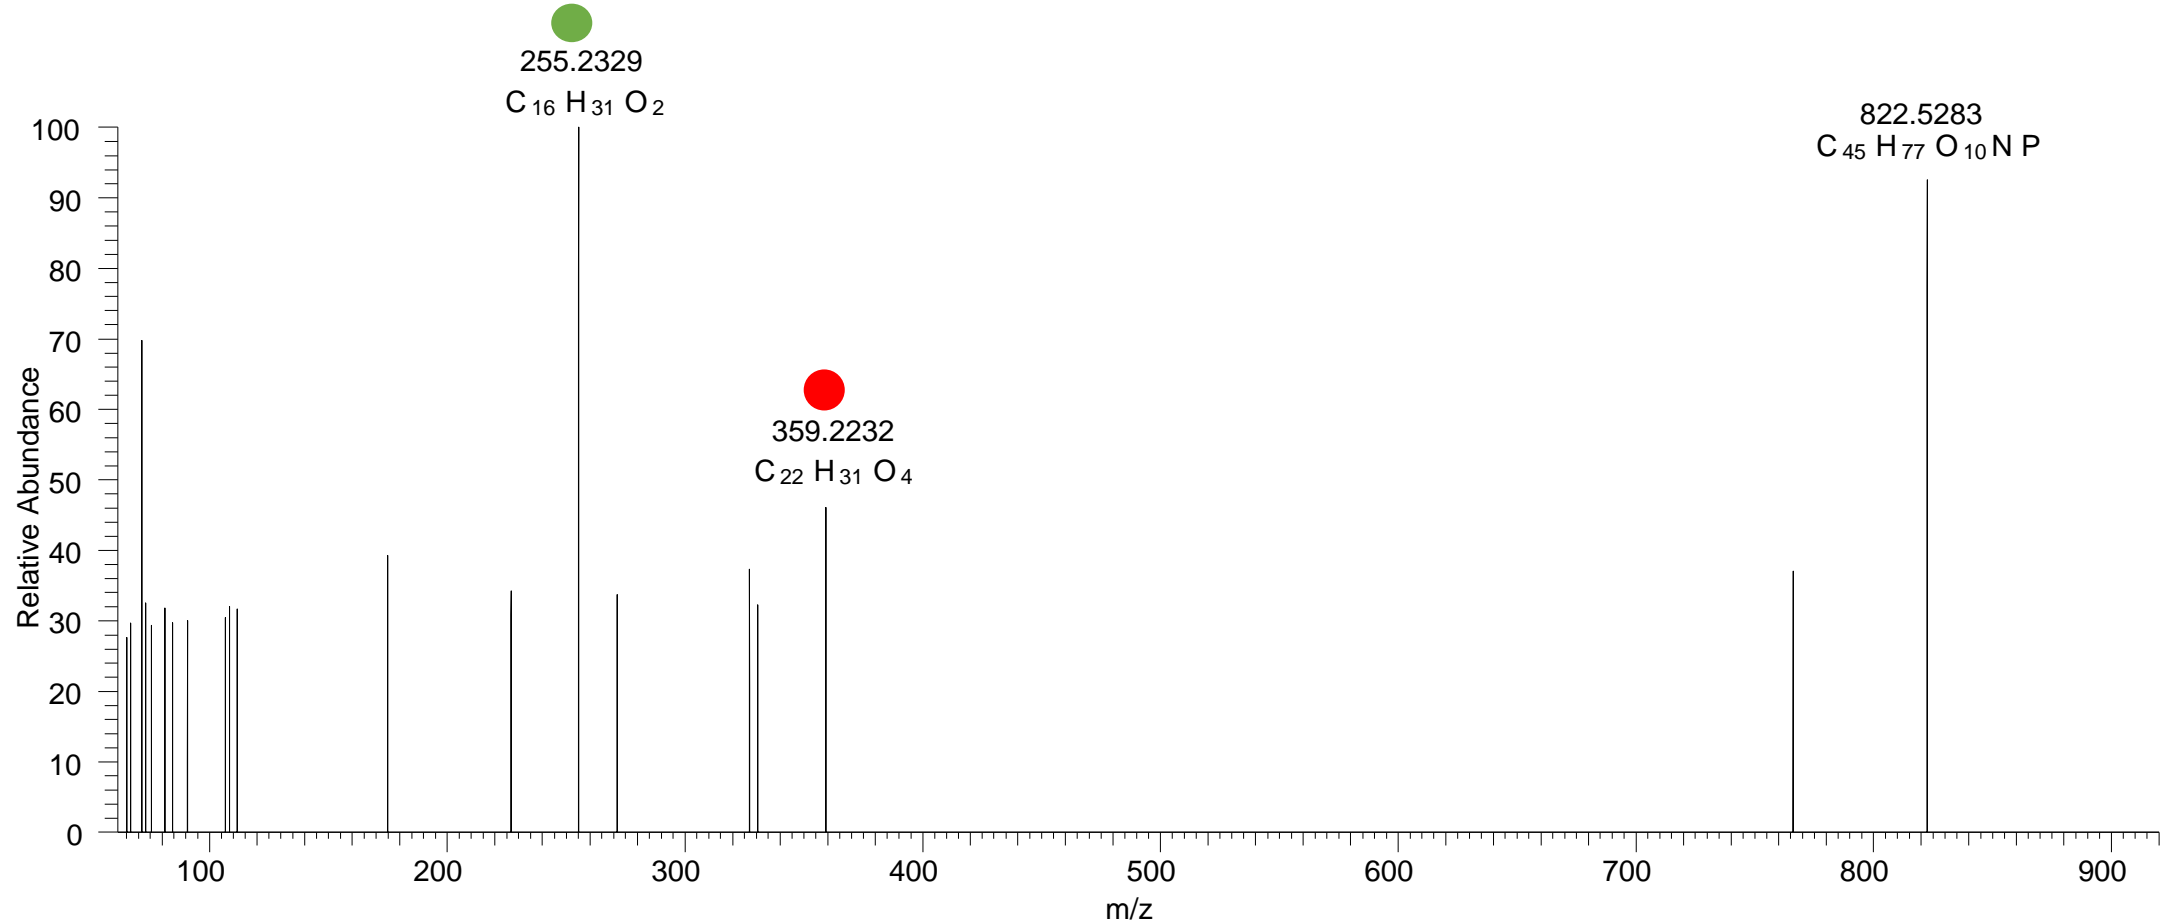

# PC(18:0\_20:4<2O>)

[oxPC+HCOO]<sup>-</sup> XIC 886.5815 NL: 4.43E3

## RT 13.1

- Fragments containing oxFAs
- Fragments related to water loss
- Fragments not containing oxFAs
- Fragments containing methylated oxFAs
- Fragments related to CO<sub>2</sub> loss
- Position-specific fragments

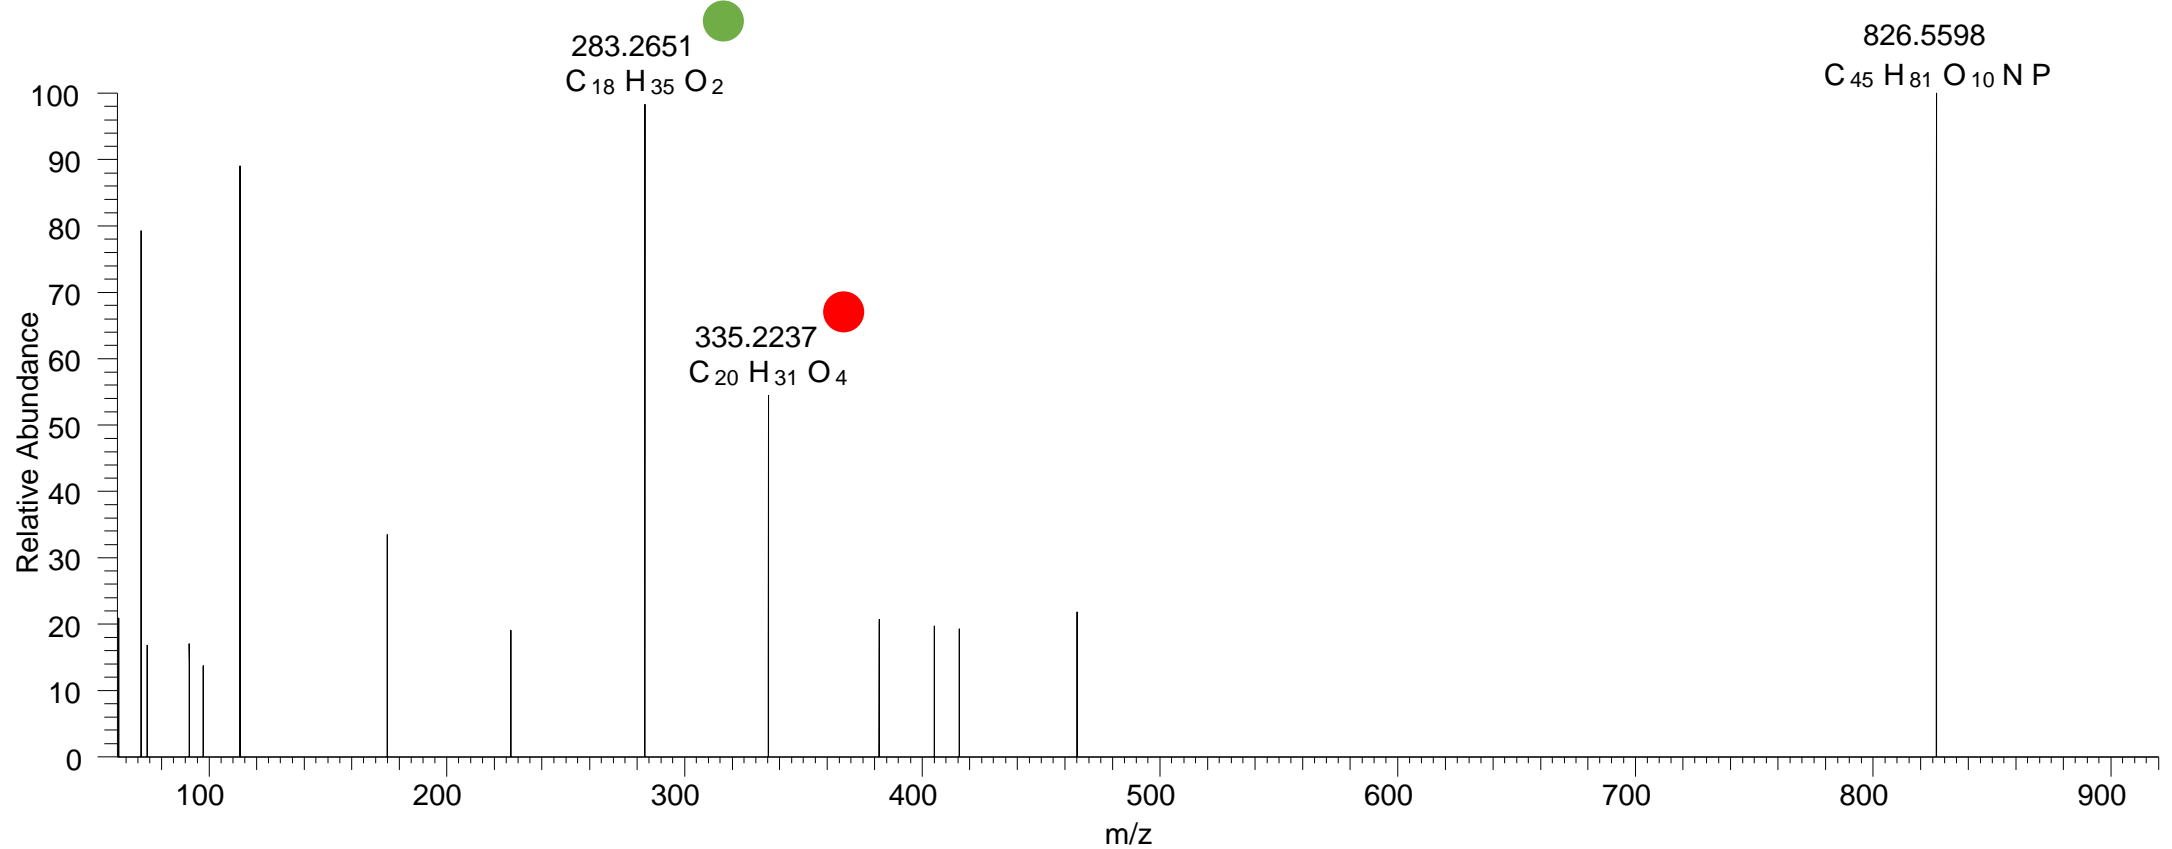

# PC(18:0\_20:4<OOH{15}>)

[oxPC+HCOO]- XIC 886.5815 NL: 3.37E3

## RT 15.3

- Fragments containing oxFAs
- Fragments related to water loss
- Fragments not containing oxFAs
- Fragments containing methylated oxFAs
- Fragments related to CO<sub>2</sub> loss
- Position-specific fragments

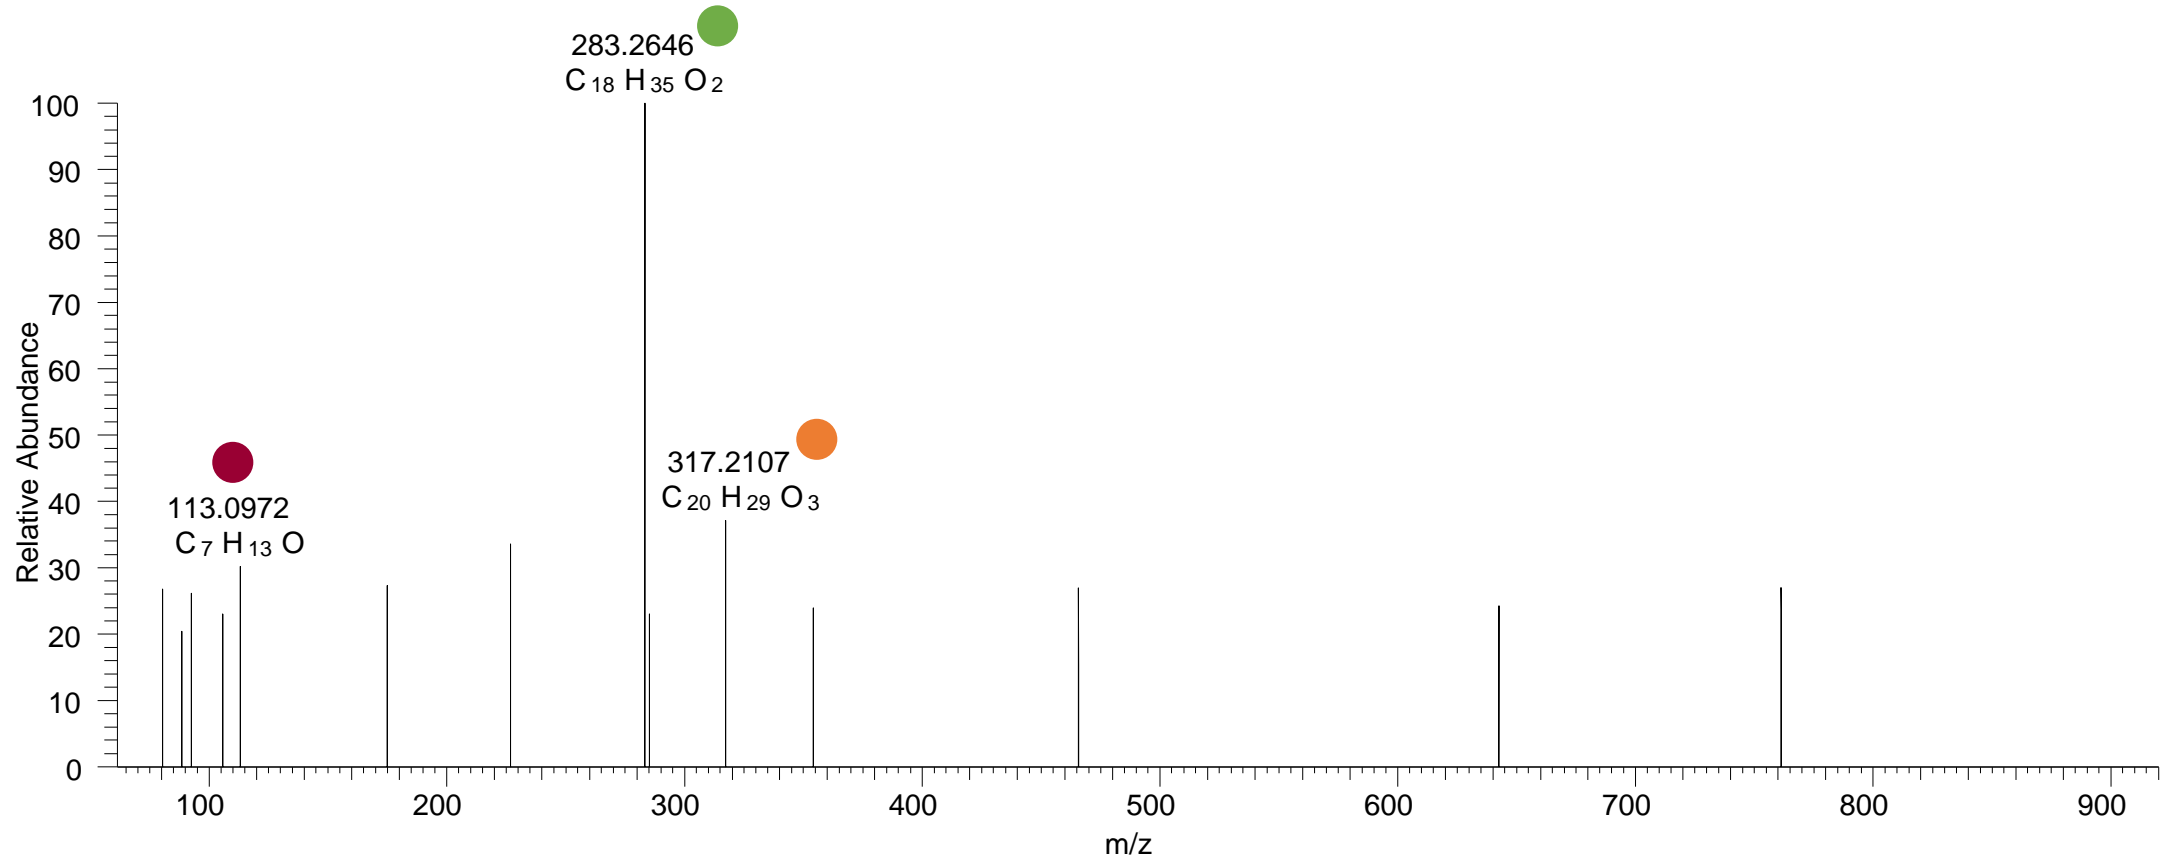

# PC(18:0\_20:4<OOH>)

[oxPC+HCOO]<sup>-</sup> XIC 886.5815 NL: 5.62E3

## RT 15.6

- Fragments containing oxFAs
- Fragments related to water loss
- Fragments not containing oxFAs
- Fragments containing methylated oxFAs
- Fragments related to CO<sub>2</sub> loss
- Position-specific fragments

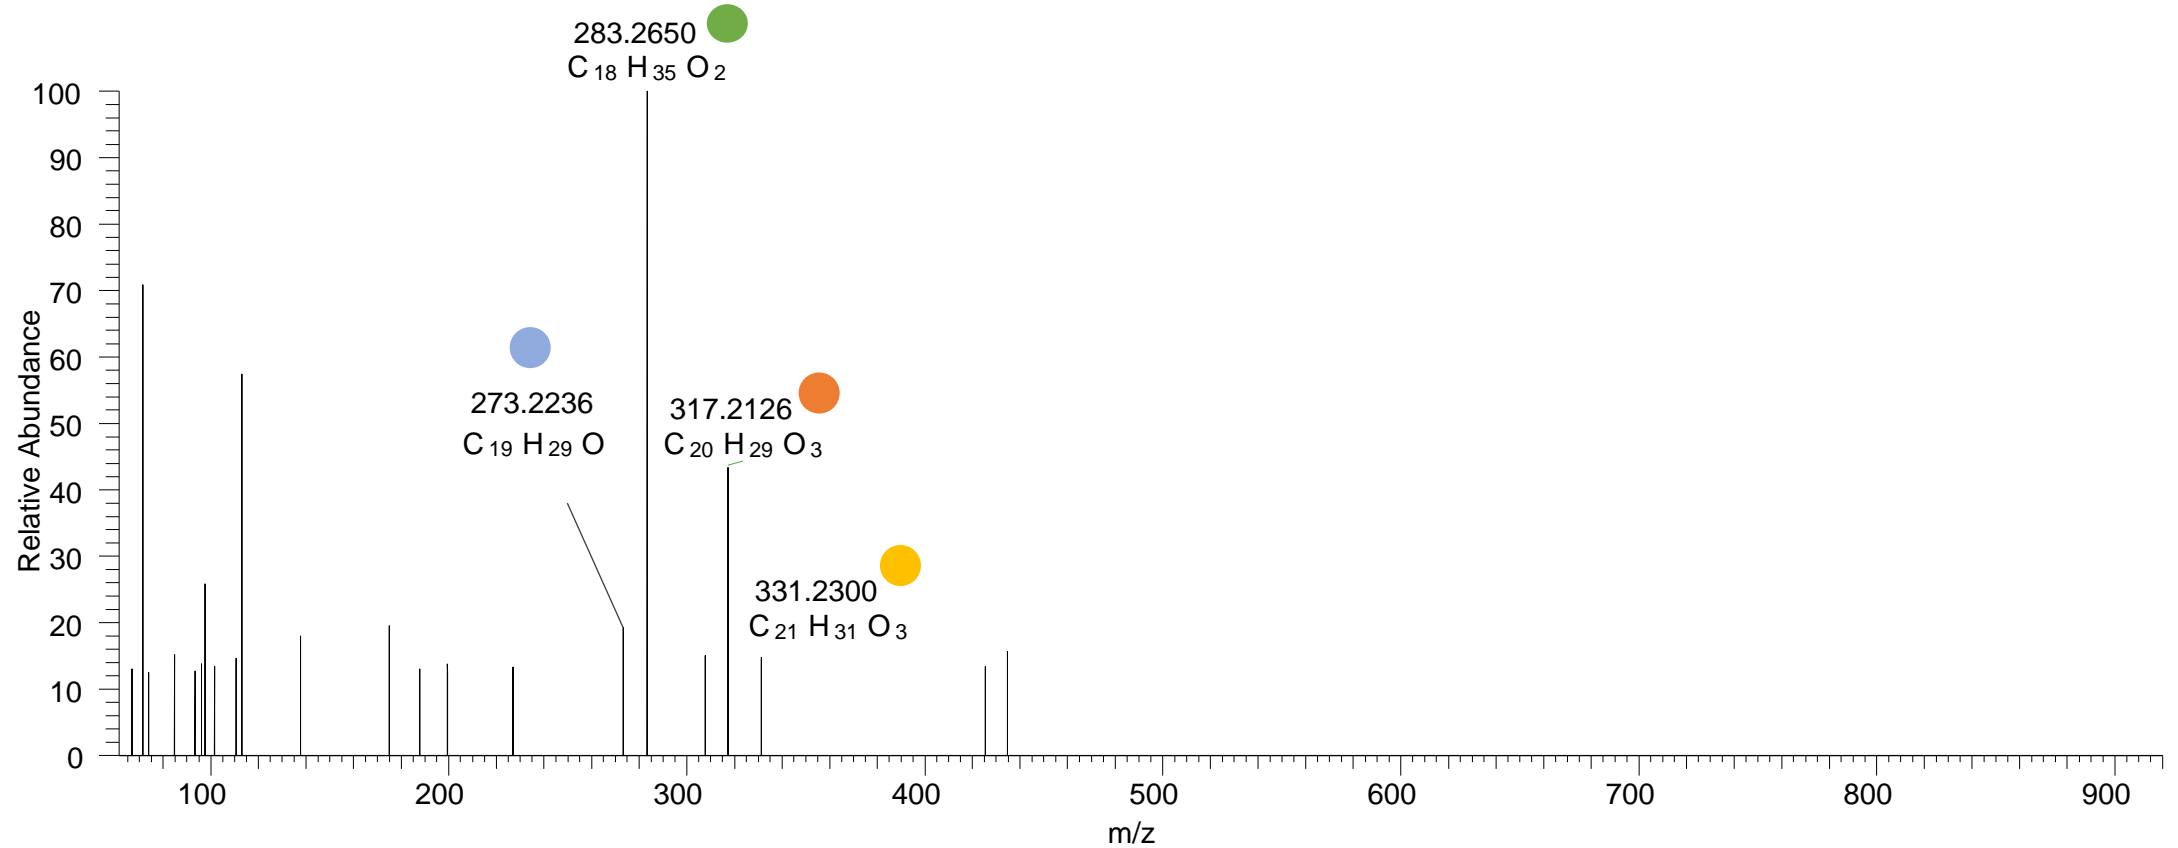

# PC(18:0\_20:4<OOH{7}>)

[oxPC+HCOO]<sup>-</sup> XIC 886.5815 NL: 4.54E3

## RT 16.0

- Fragments containing oxFAs
- Fragments related to water loss
- Fragments not containing oxFAs
- Fragments containing methylated oxFAs
- Fragments related to CO<sub>2</sub> loss
- Position-specific fragments

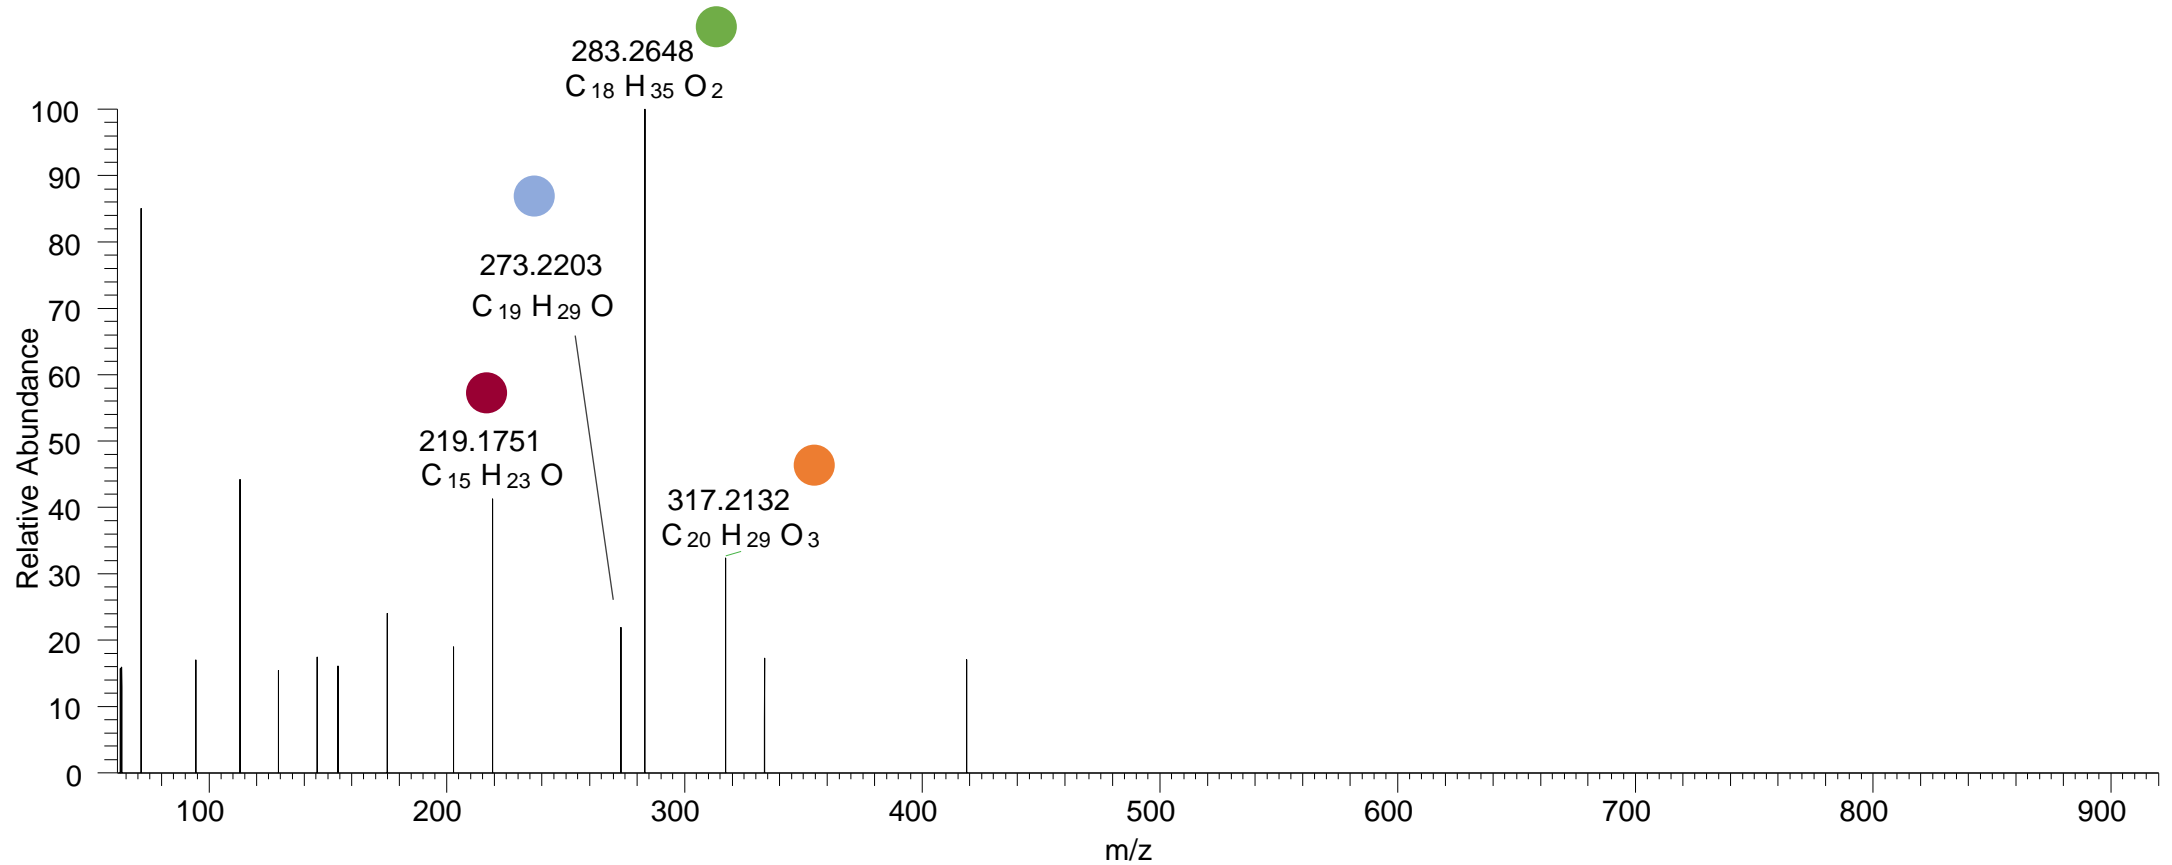

# PC(18:0\_22:6<O>)

[oxPC+HCOO]<sup>-</sup> XIC 894.5866 NL: 3.96E3

## RT 15.2-16.2

- Fragments containing oxFAs
- Fragments related to water loss
- Fragments not containing oxFAs
- Fragments containing methylated oxFAs
- Fragments related to CO<sub>2</sub> loss
- Position-specific fragments

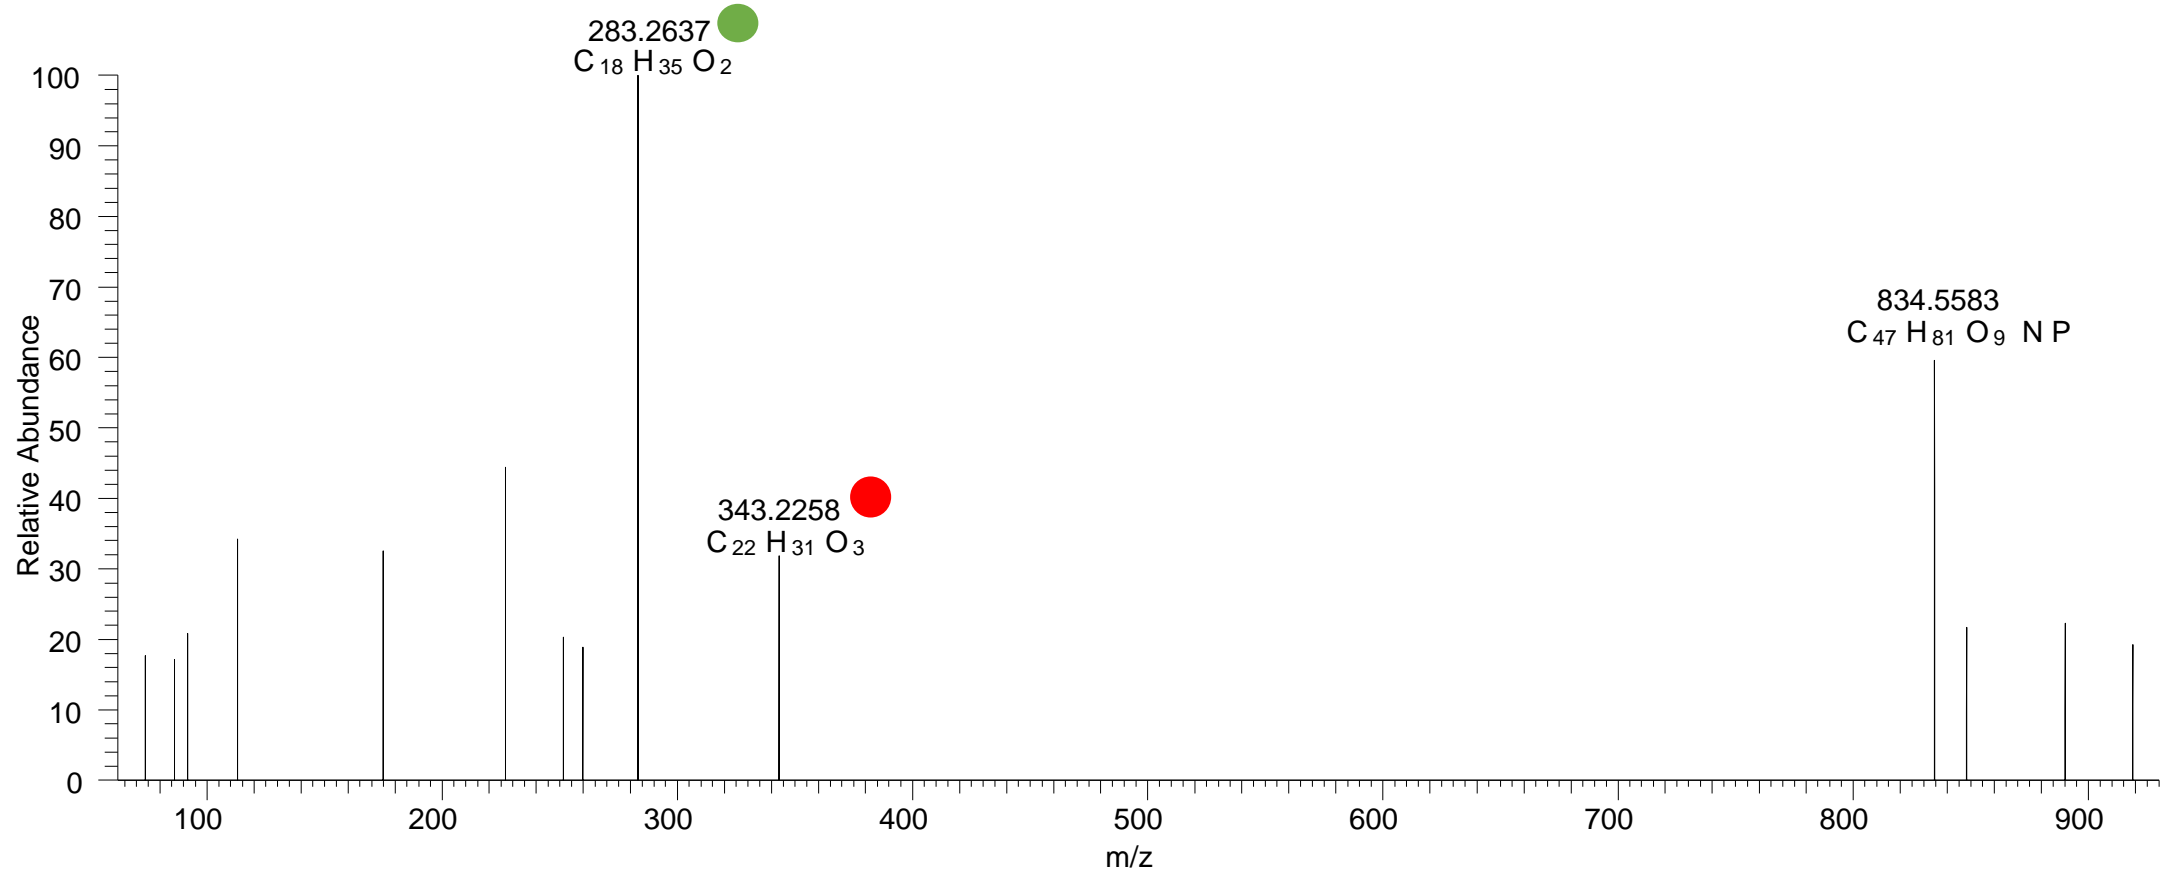

OT2D\_pool

# PC(16:1\_18:2<O>)

[oxPC+HCOO]<sup>-</sup> XIC 816.5396 NL: 5.11E3

## RT 11.9-12.0

- Fragments containing oxFAs
- Fragments related to water loss
- Fragments not containing oxFAs
- Fragments containing methylated oxFAs
- Fragments related to CO<sub>2</sub> loss
- Position-specific fragments

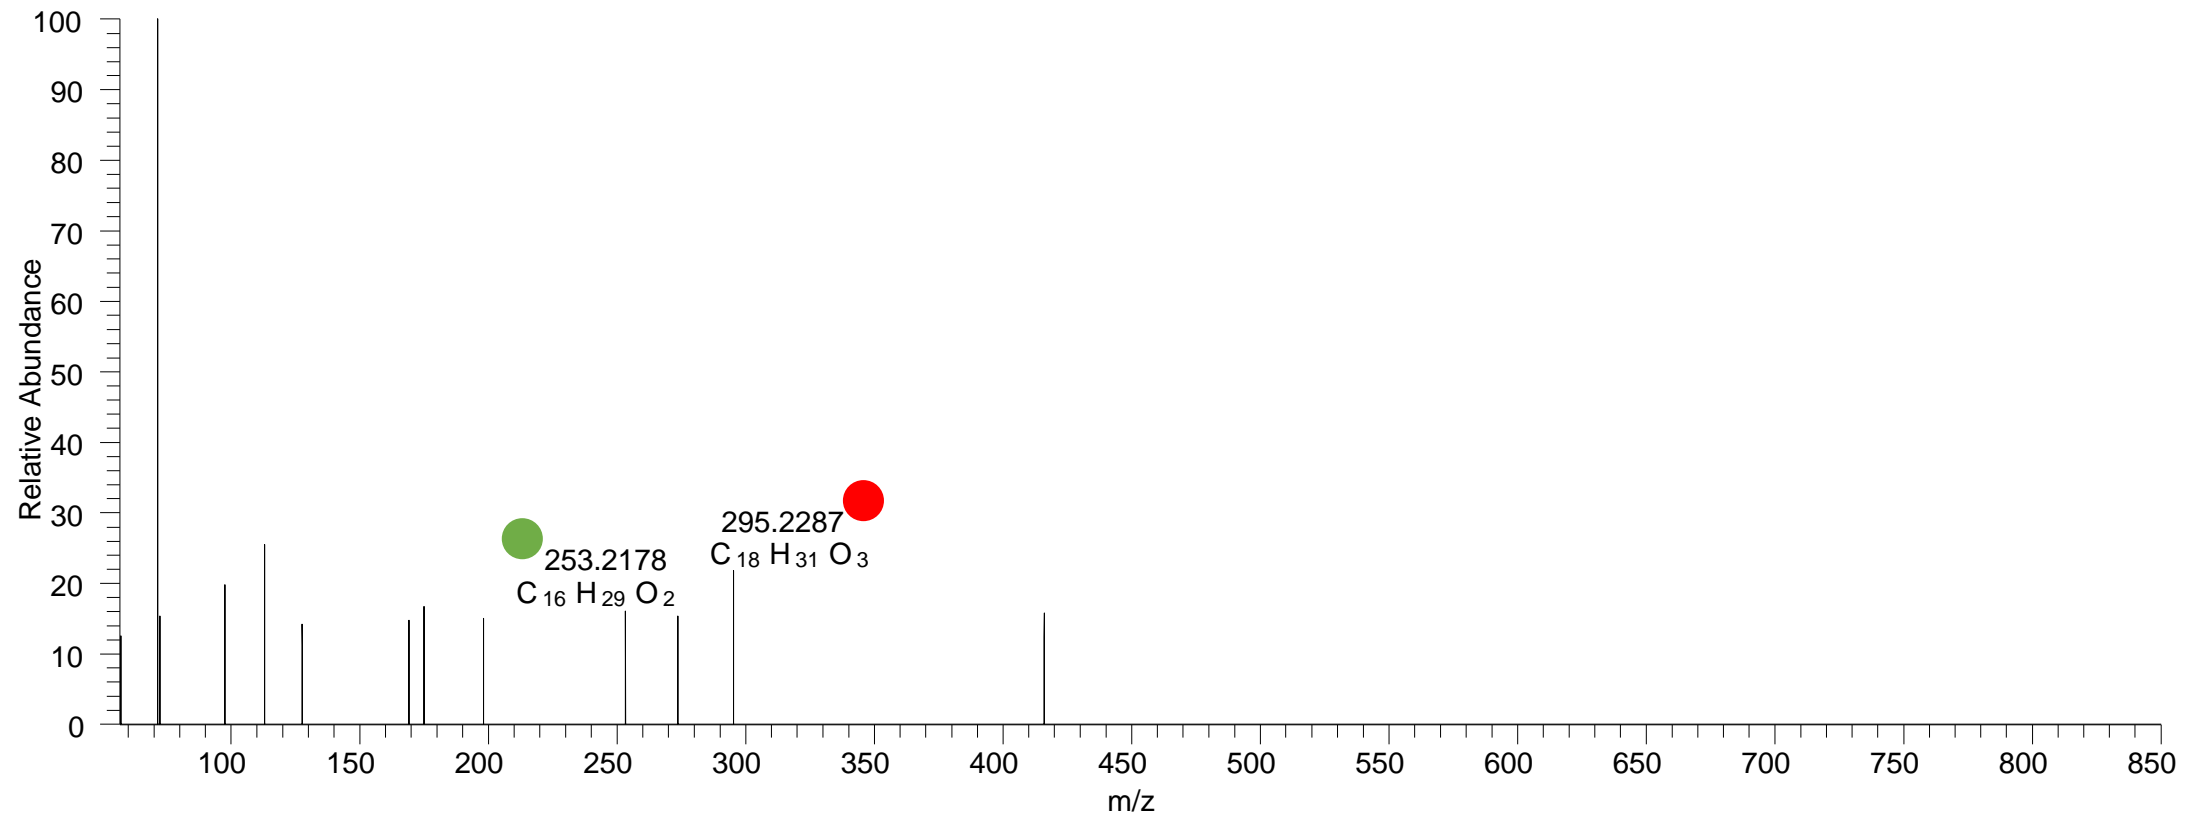



# PC(16:0\_18:2<OH>)

[oxPC+HCOO]<sup>-</sup> XIC 818.5553 NL: 1.70E4

## RT 12.6

- Fragments containing oxFAs
- Fragments related to water loss
- Fragments not containing oxFAs
- Fragments containing methylated oxFAs
- Fragments related to CO<sub>2</sub> loss
- Position-specific fragments

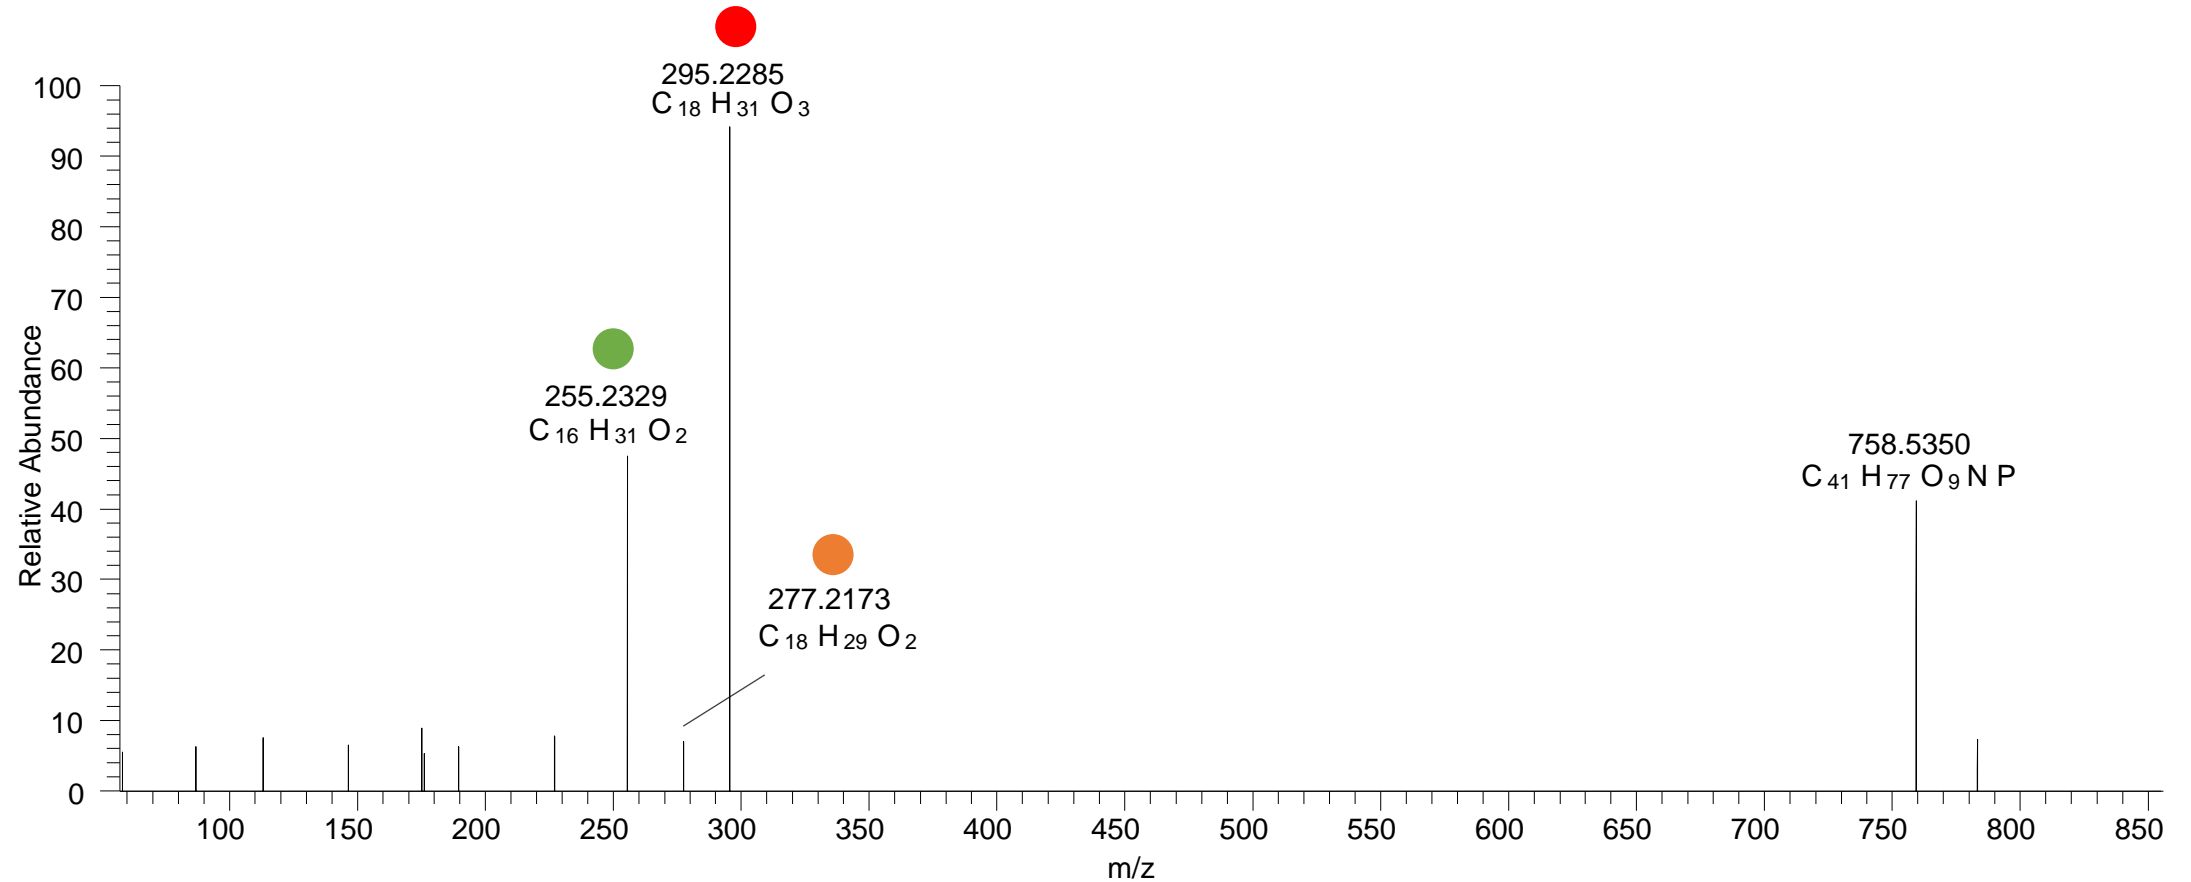

# PC(16:0\_18:2<OH{13}>)

[oxPC+HCOO]<sup>-</sup> XIC 818.5553 NL: 1.27E5

## RT 13.4

- Fragments containing oxFAs
- Fragments related to water loss
- Fragments not containing oxFAs
- Fragments containing methylated oxFAs
- Fragments related to CO<sub>2</sub> loss
- Position-specific fragments

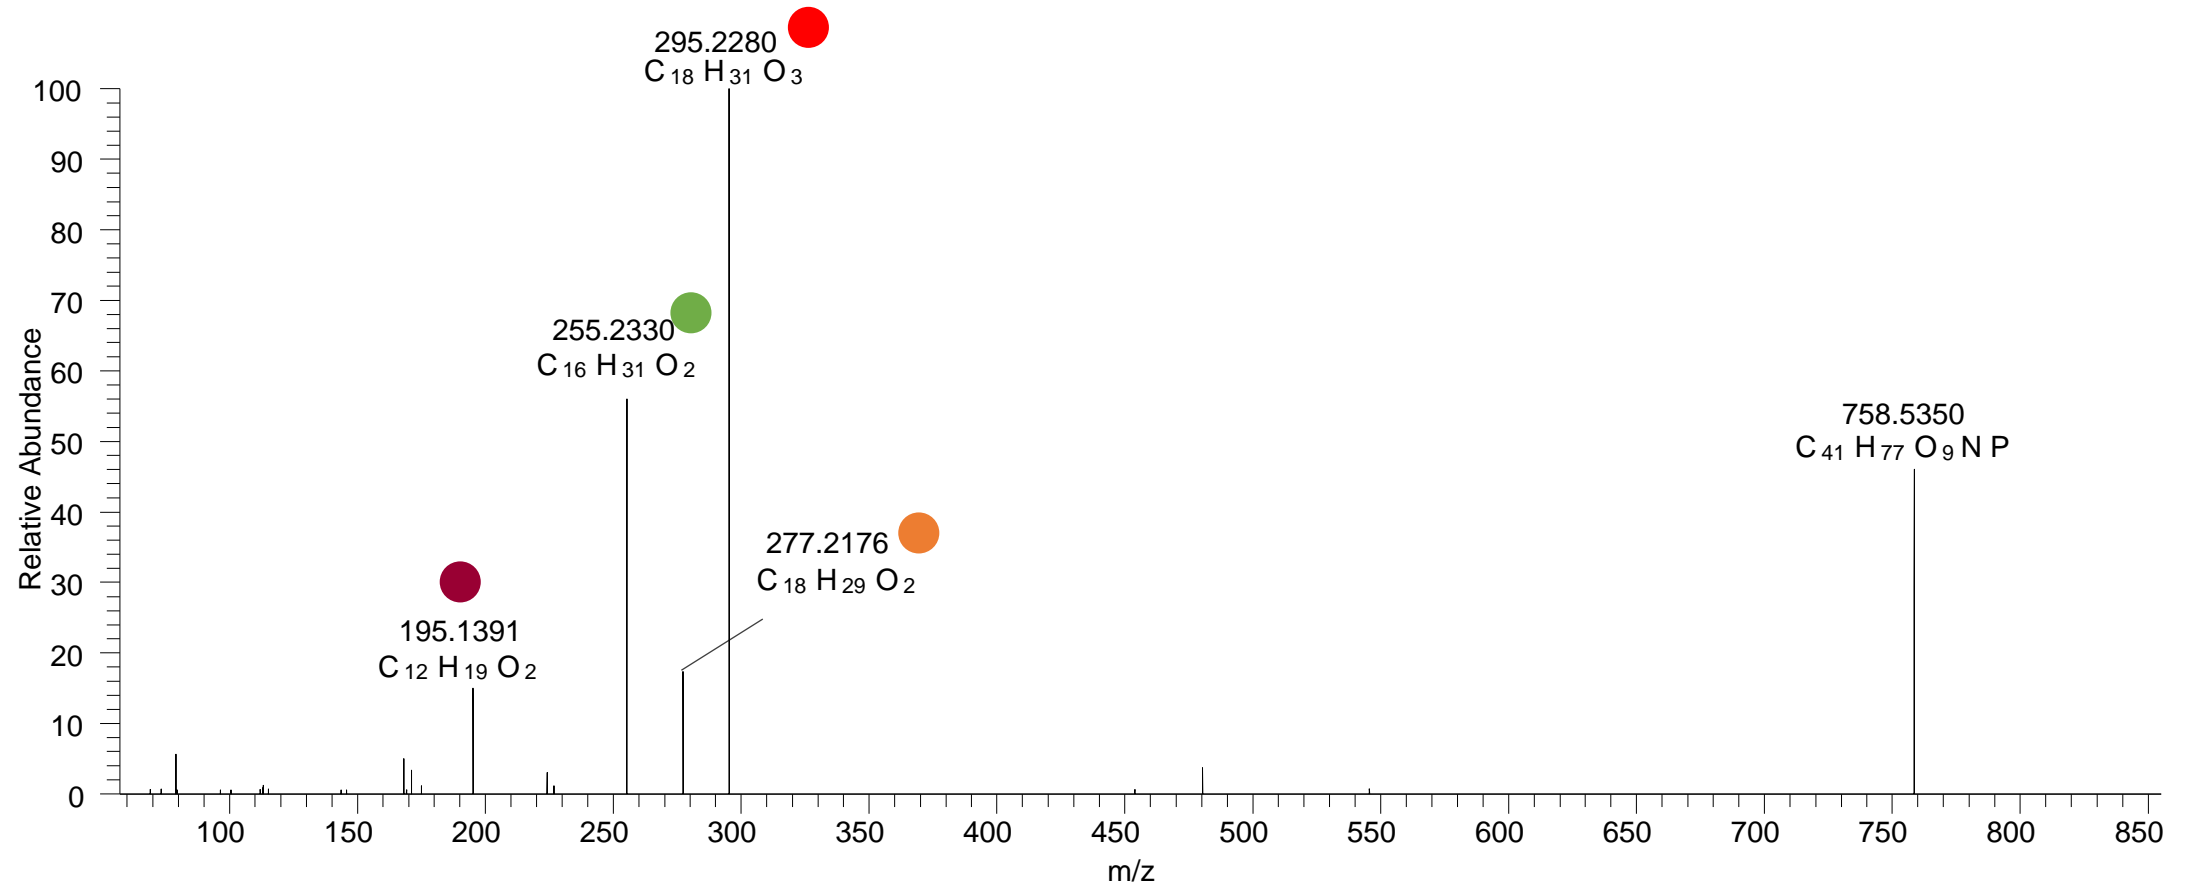

# PC(16:0\_18:2<OH{9}>)

[oxPC+HCOO]<sup>-</sup> XIC 818.5553 NL: 1.15E5

## RT 13.6

- Fragments containing oxFAs
- Fragments related to water loss
- Fragments not containing oxFAs
- Fragments containing methylated oxFAs
- Fragments related to CO<sub>2</sub> loss
- Position-specific fragments

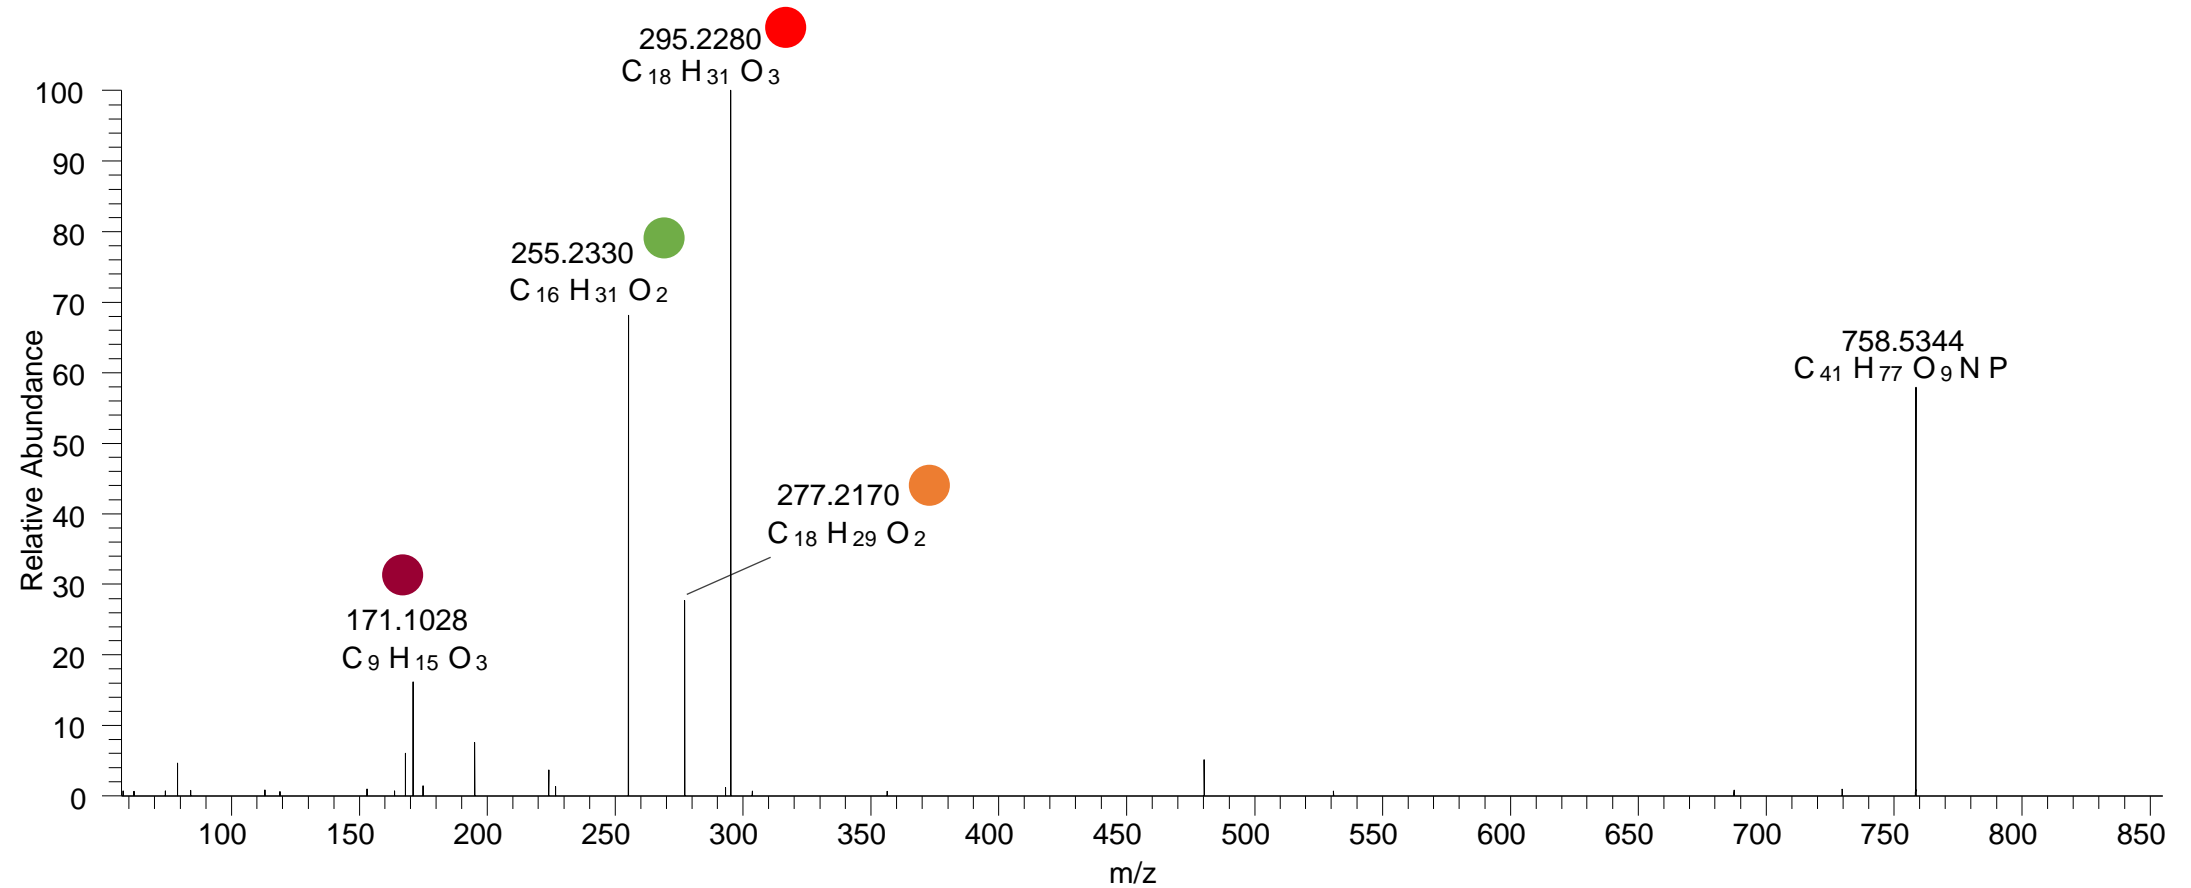

# PC(16:0<O>\_18:2)

[oxPC+HCOO]<sup>-</sup> XIC 818.5553 NL: 4.49E3

## RT 15.7

- Fragments containing oxFAs
- Fragments related to water loss
- Fragments not containing oxFAs
- Fragments containing methylated oxFAs
- Fragments related to CO<sub>2</sub> loss
- Position-specific fragments

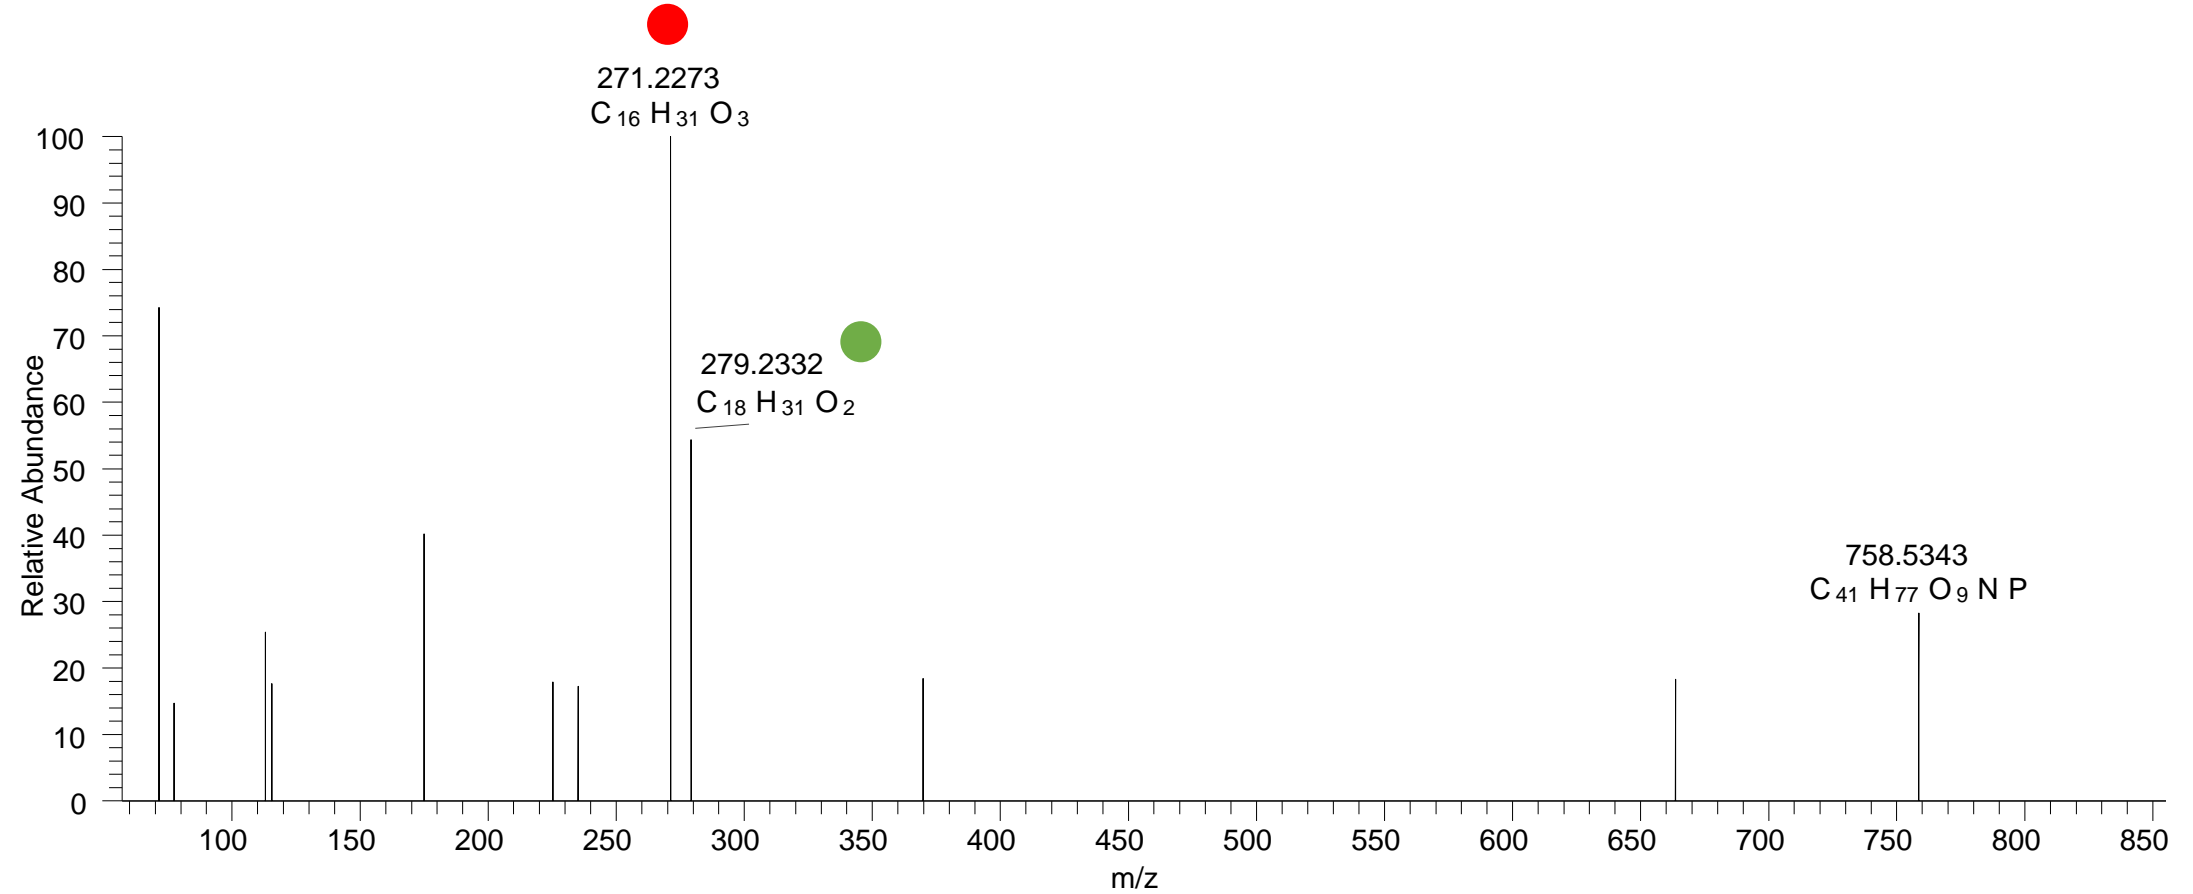

# PC(16:0\_18:1<O>)

[oxPC+HCOO]<sup>-</sup> XIC 820.5709 NL: 2.04E3

## RT 14.4

- Fragments containing oxFAs
- Fragments related to water loss
- Fragments not containing oxFAs
- Fragments containing methylated oxFAs
- Fragments related to CO<sub>2</sub> loss
- Position-specific fragments

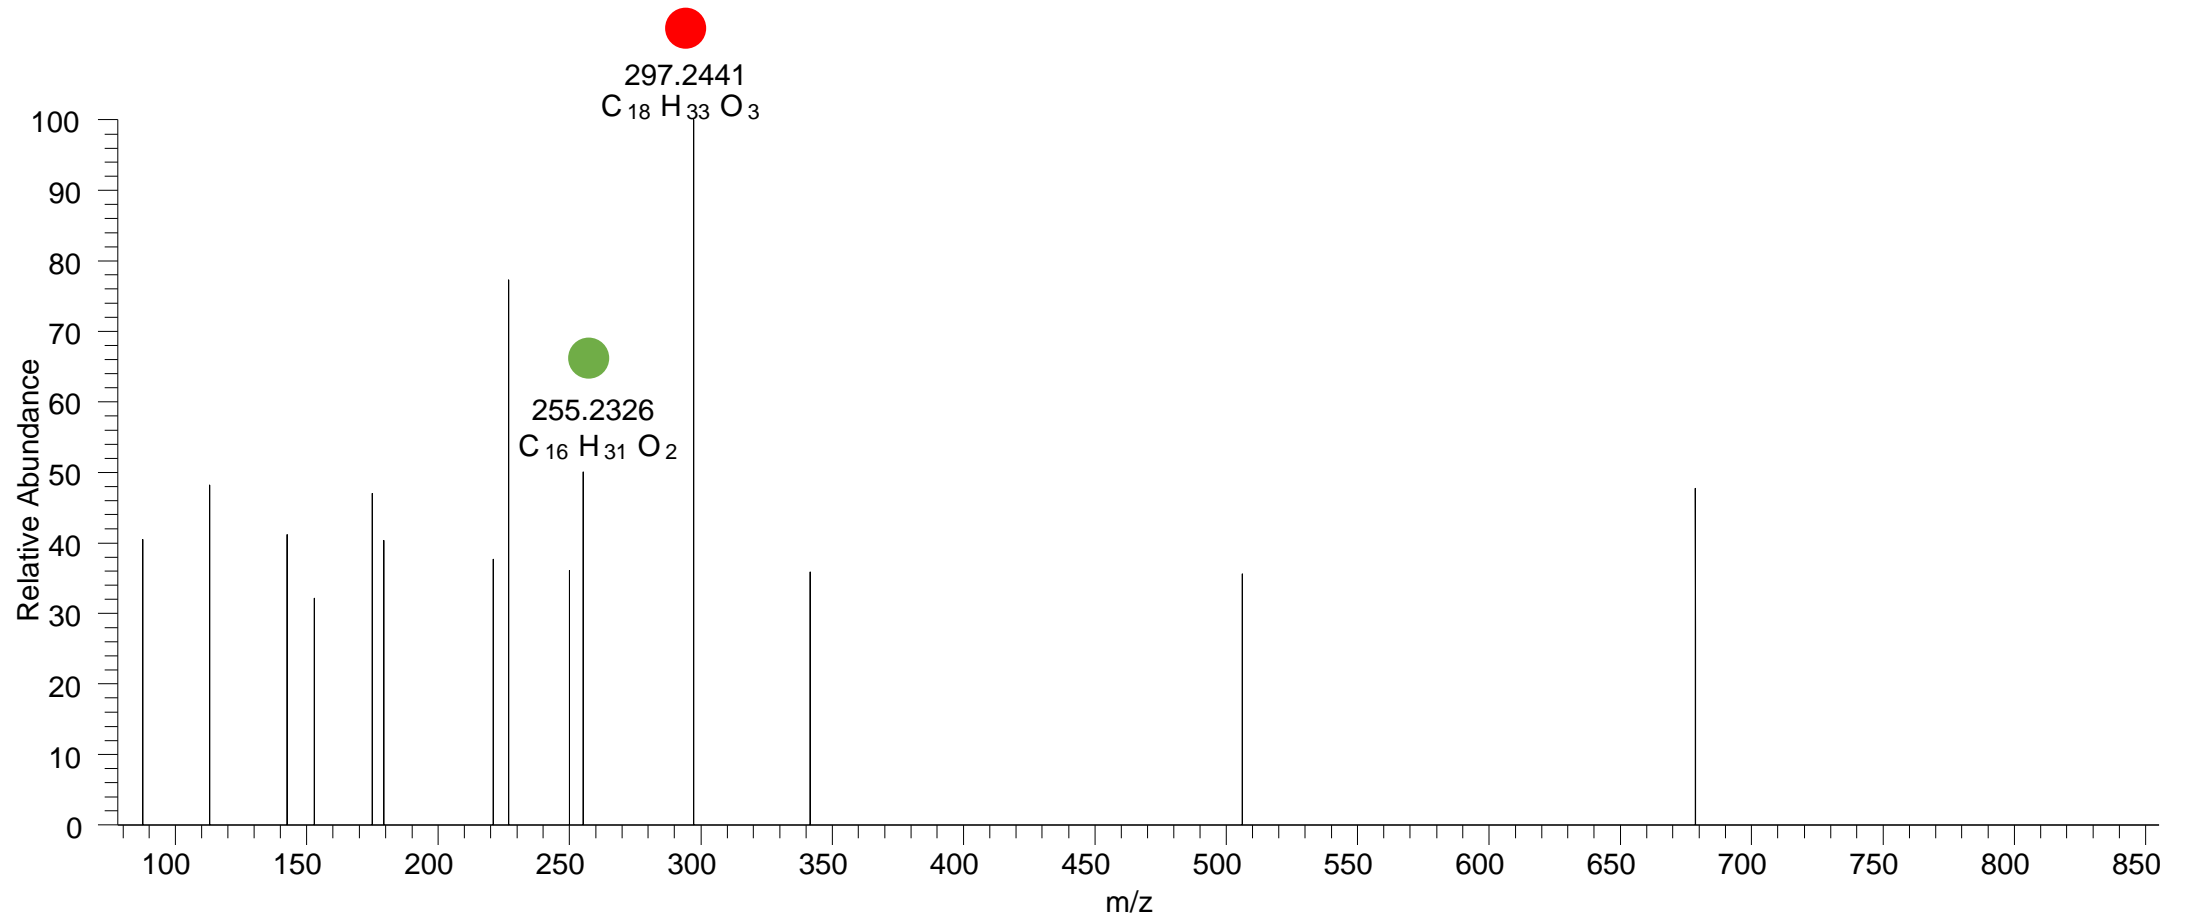

# PC(16:0<O>\_18:1)

[oxPC+HCOO]<sup>-</sup> XIC 820.5709 NL: 4.78E3

## RT 16.8-17.1

- Fragments containing oxFAs
- Fragments related to water loss
- Fragments not containing oxFAs
- Fragments containing methylated oxFAs
- Fragments related to CO<sub>2</sub> loss
- Position-specific fragments

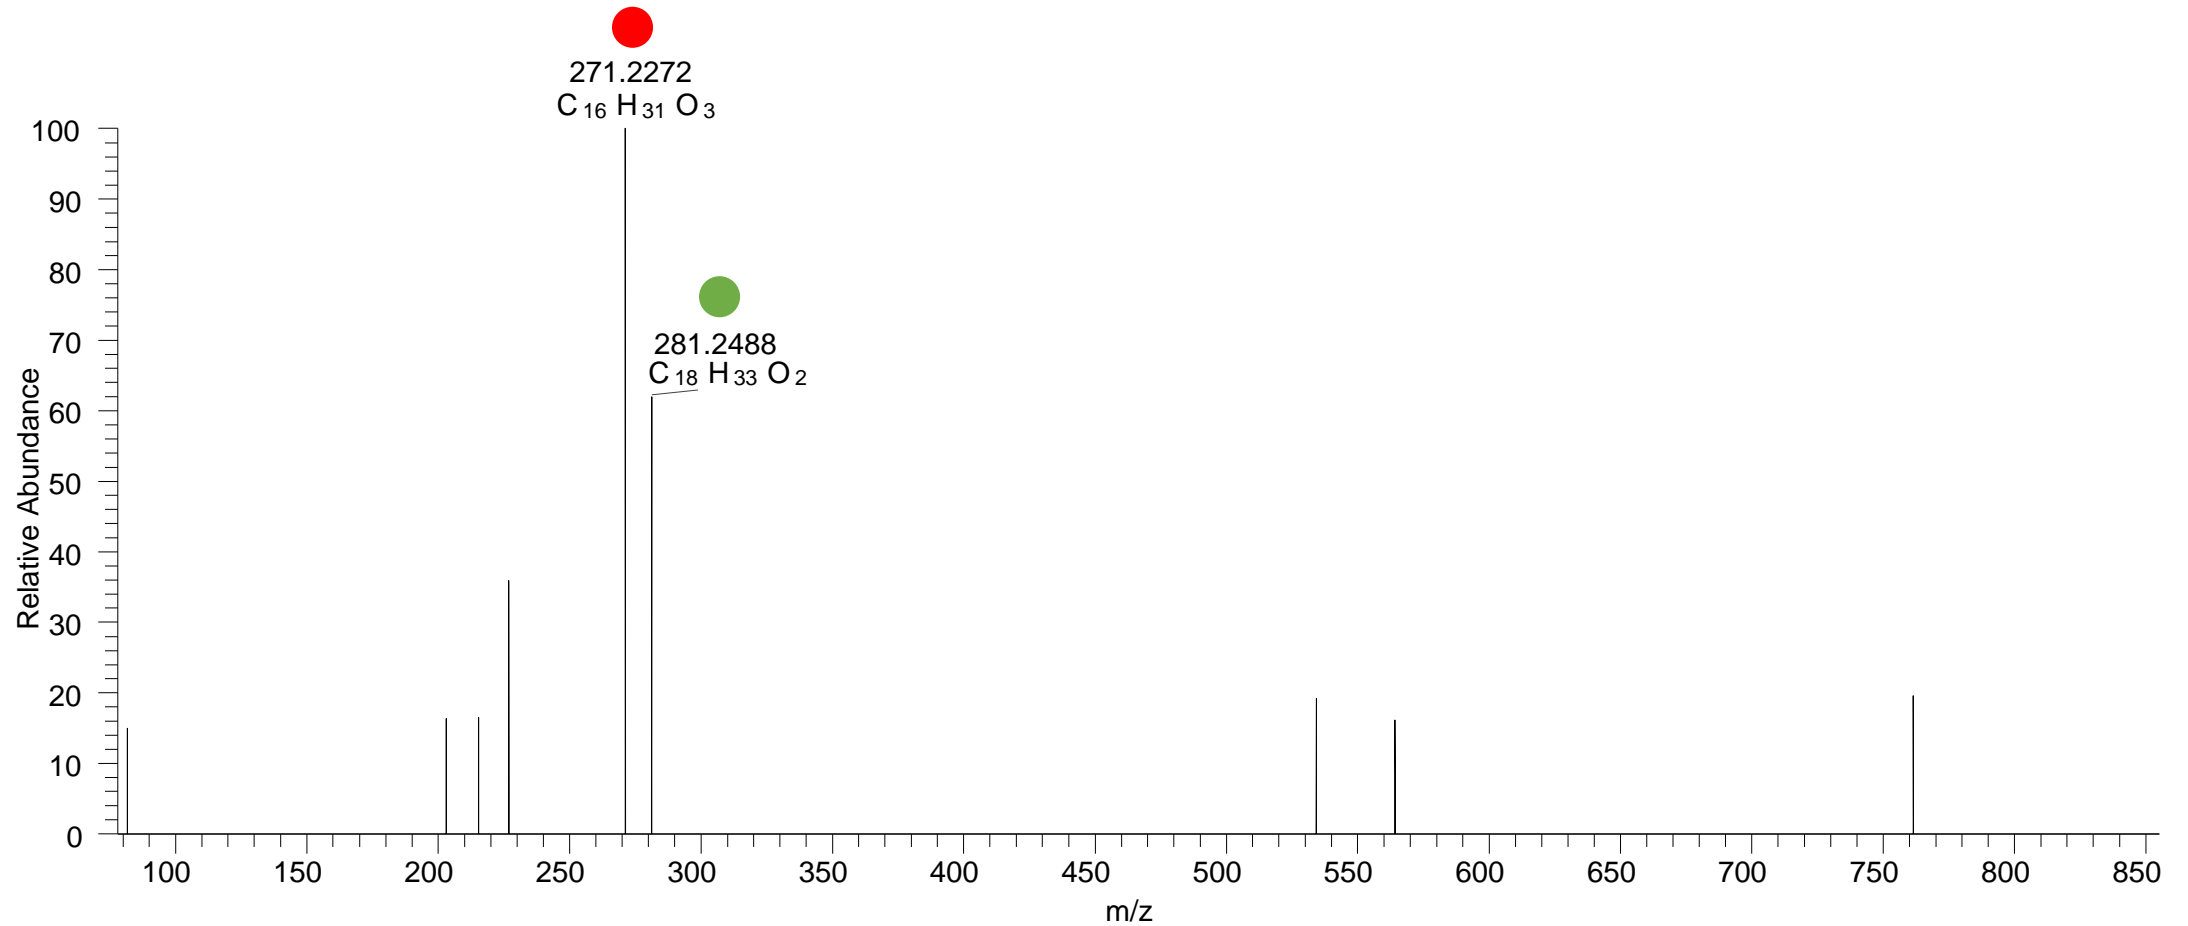

# PC(16:0\_18:2<OH,O{9}>)

[oxPC+HCOO]<sup>-</sup> XIC 834.5502 NL: 4.04E3

## RT 11.6

- Fragments containing oxFAs
- Fragments related to water loss
- Fragments not containing oxFAs
- Fragments containing methylated oxFAs
- Fragments related to CO<sub>2</sub> loss
- Position-specific fragments

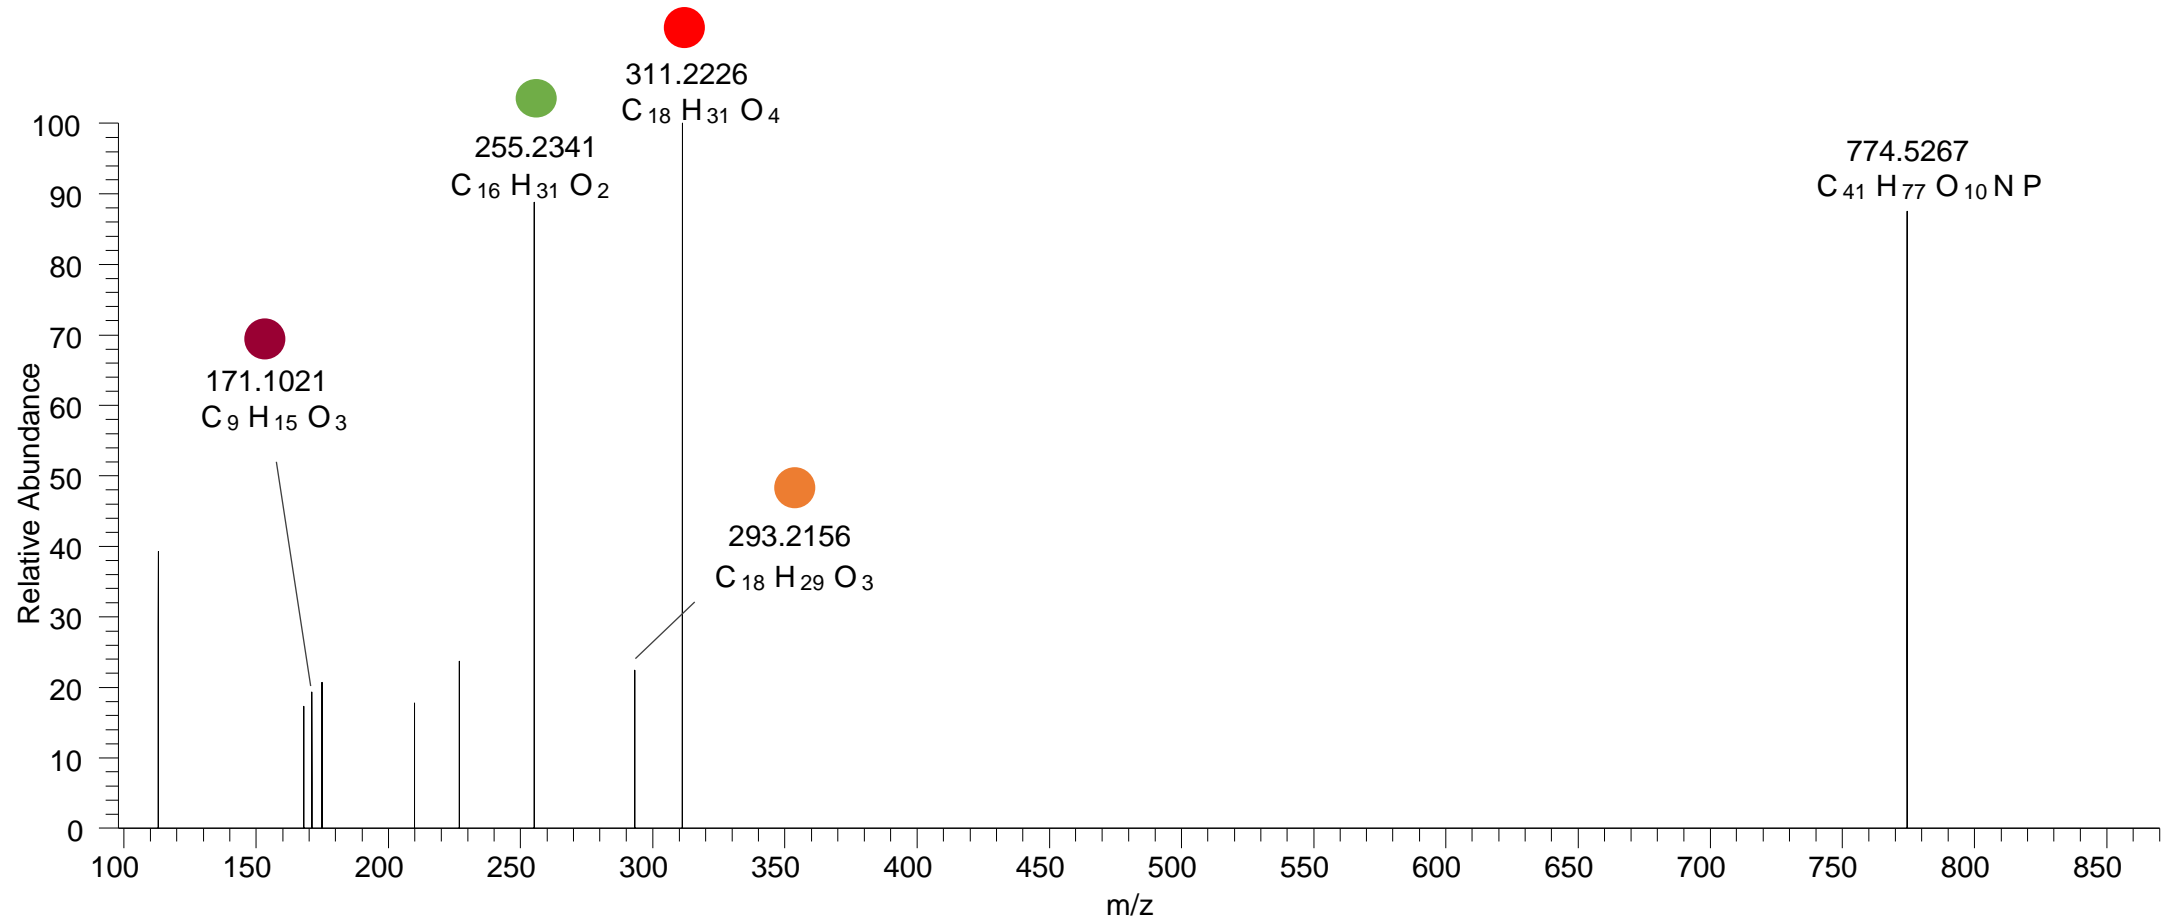

# PC(16:0\_18:2<2O>)

[oxPC+HCOO]<sup>-</sup> XIC 834.5502 NL: 2.57E3

## RT 12.0

- Fragments containing oxFAs
- Fragments related to water loss
- Fragments not containing oxFAs
- Fragments containing methylated oxFAs
- Fragments related to CO<sub>2</sub> loss
- Position-specific fragments

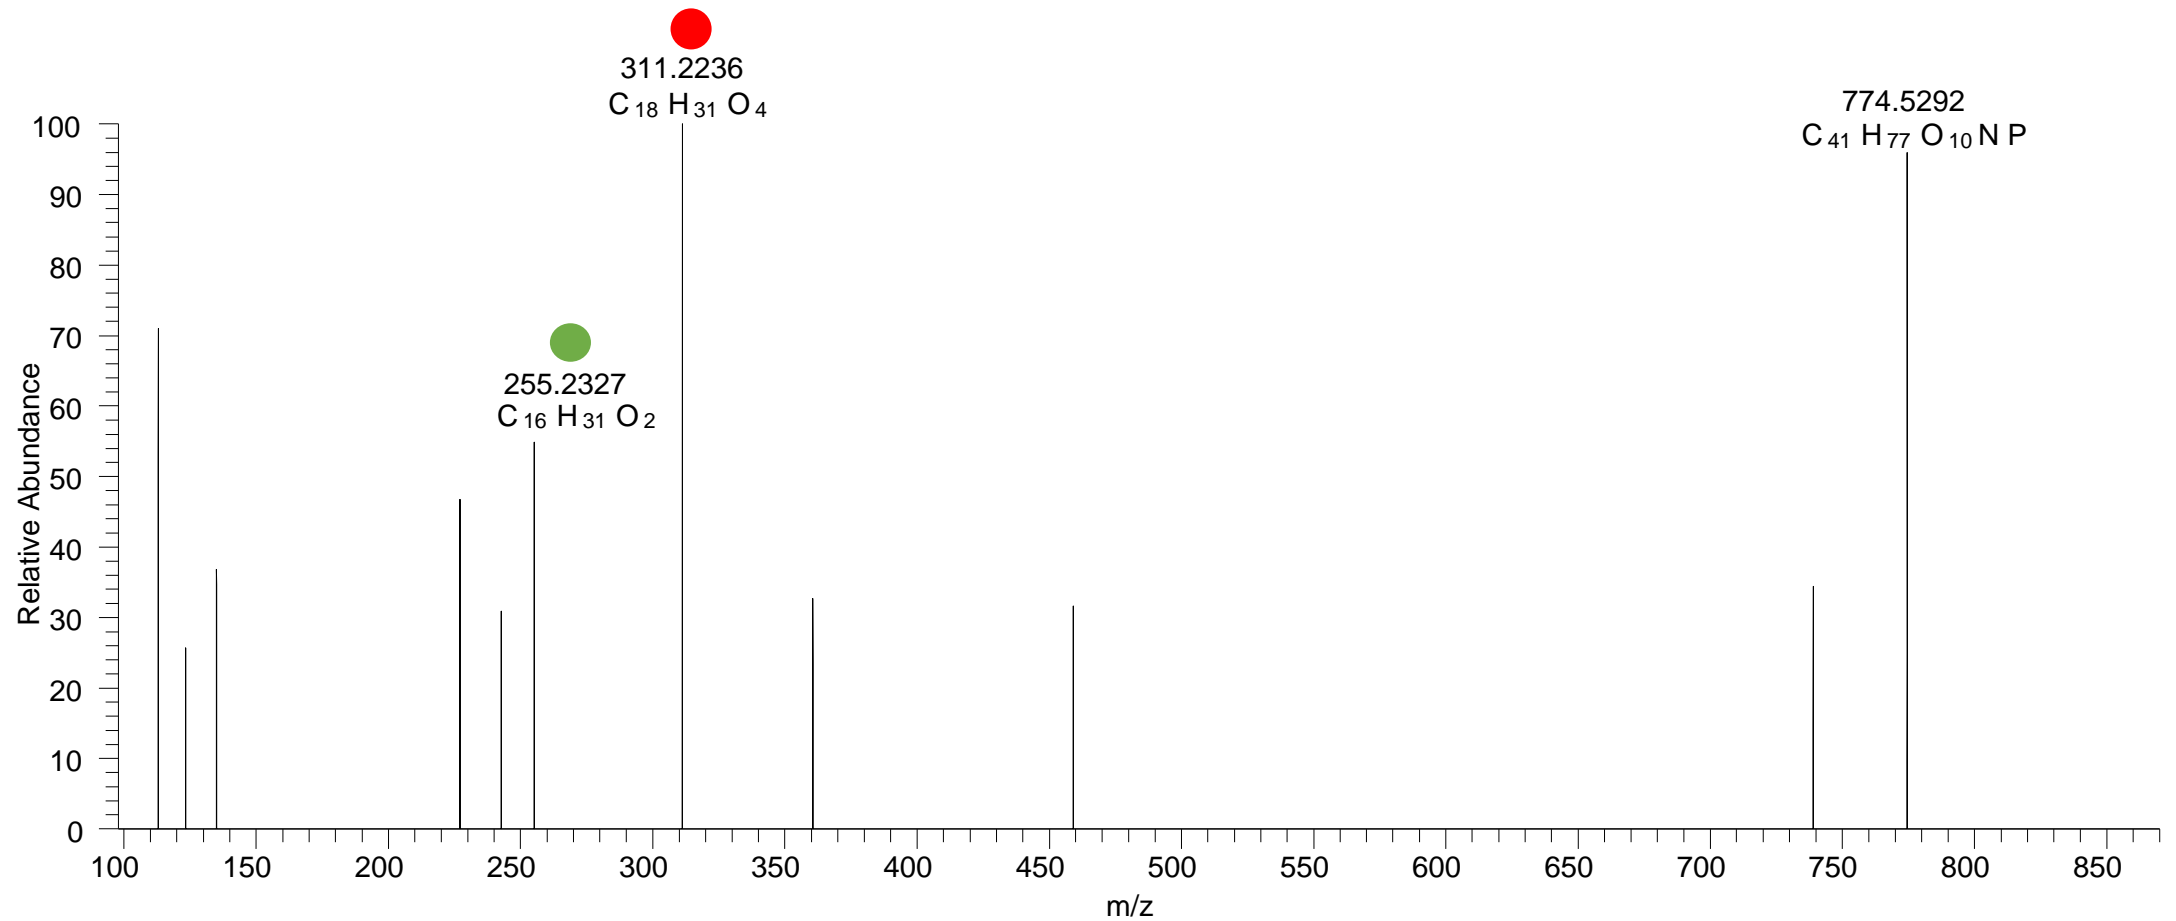



# PC(16:0\_18:2<OOH>)

[oxPC+HCOO]<sup>-</sup> XIC 834.5502 NL: 2.31E3

## RT 12.6

- Fragments containing oxFAs
- Fragments related to water loss
- Fragments not containing oxFAs
- Fragments containing methylated oxFAs
- Fragments related to CO<sub>2</sub> loss
- Position-specific fragments

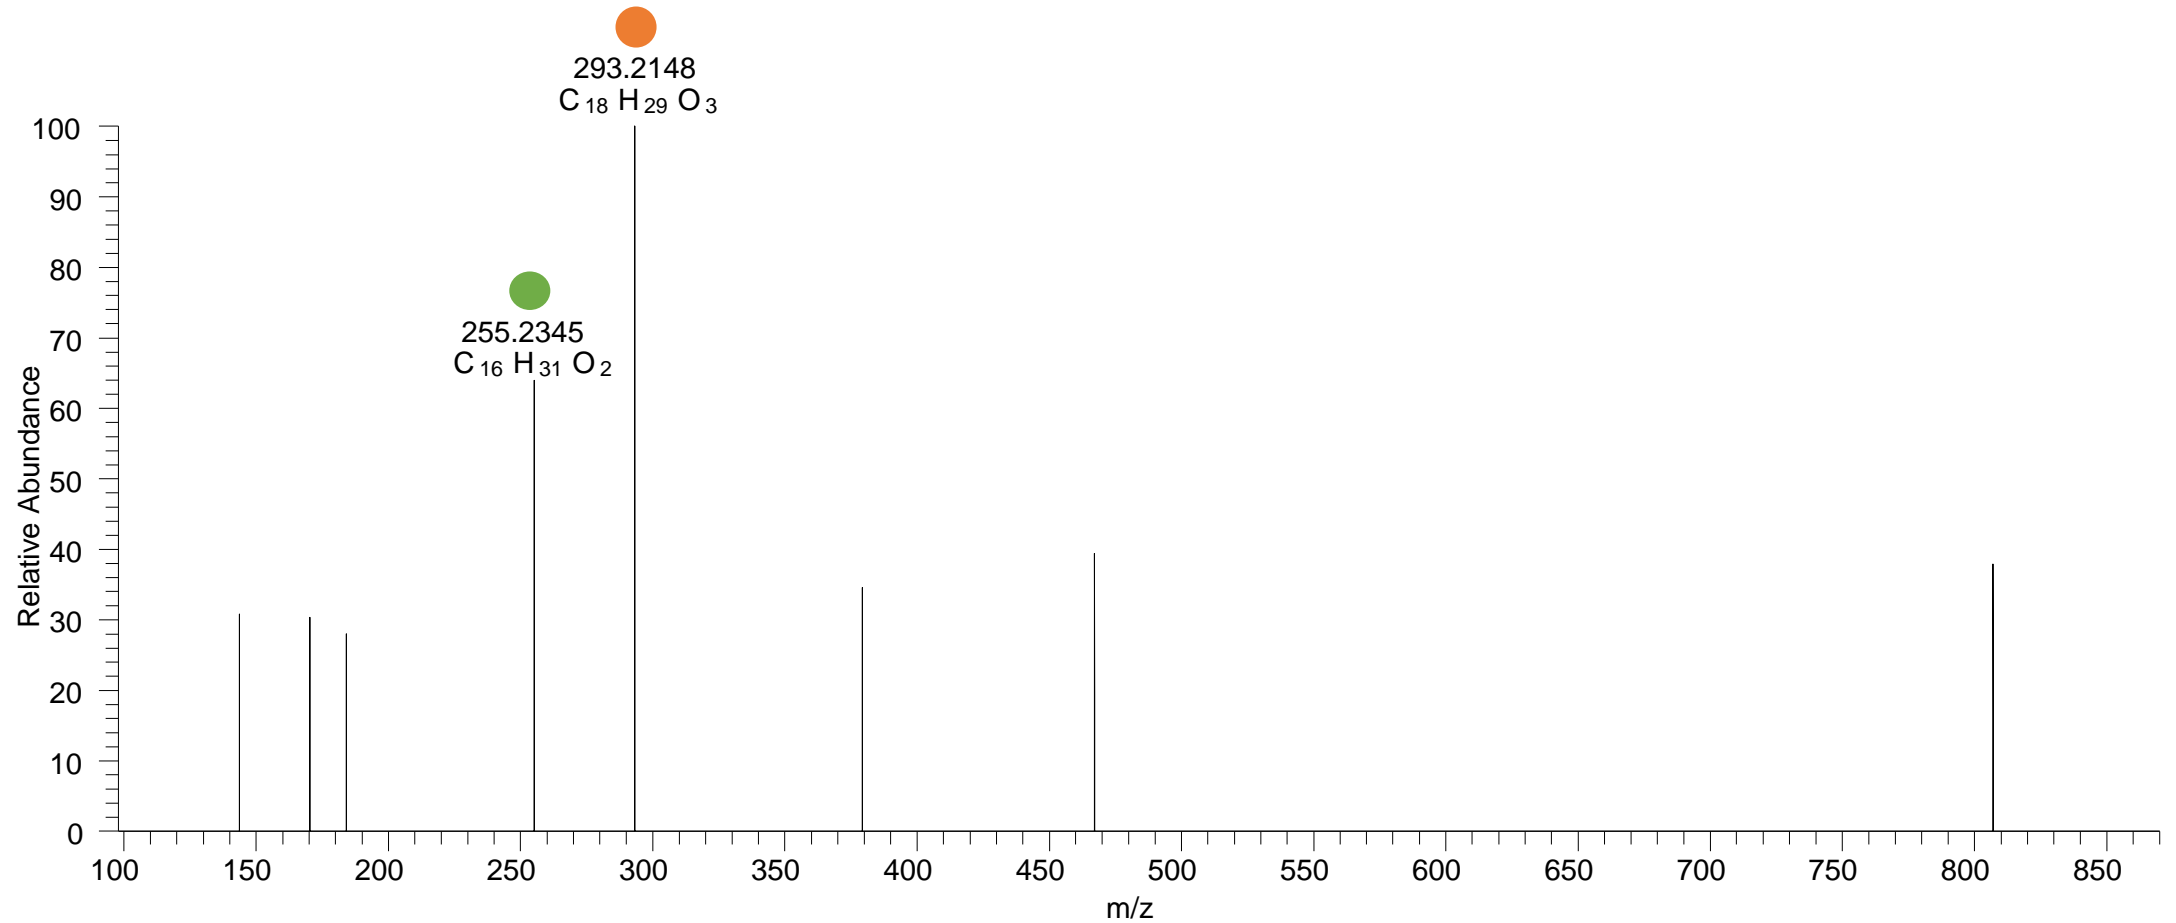

# PC(16:0\_18:2<OOH{9}>) PC(16:0\_18:2<OOH{13}>) RT 13.2-13.4

[oxPC+HCOO]- XIC 834.5502 NL: 4.09E4

- Fragments containing oxFAs
- Fragments related to water loss
- Fragments not containing oxFAs
- Fragments containing methylated oxFAs
- Fragments related to CO<sub>2</sub> loss
- Position-specific fragments

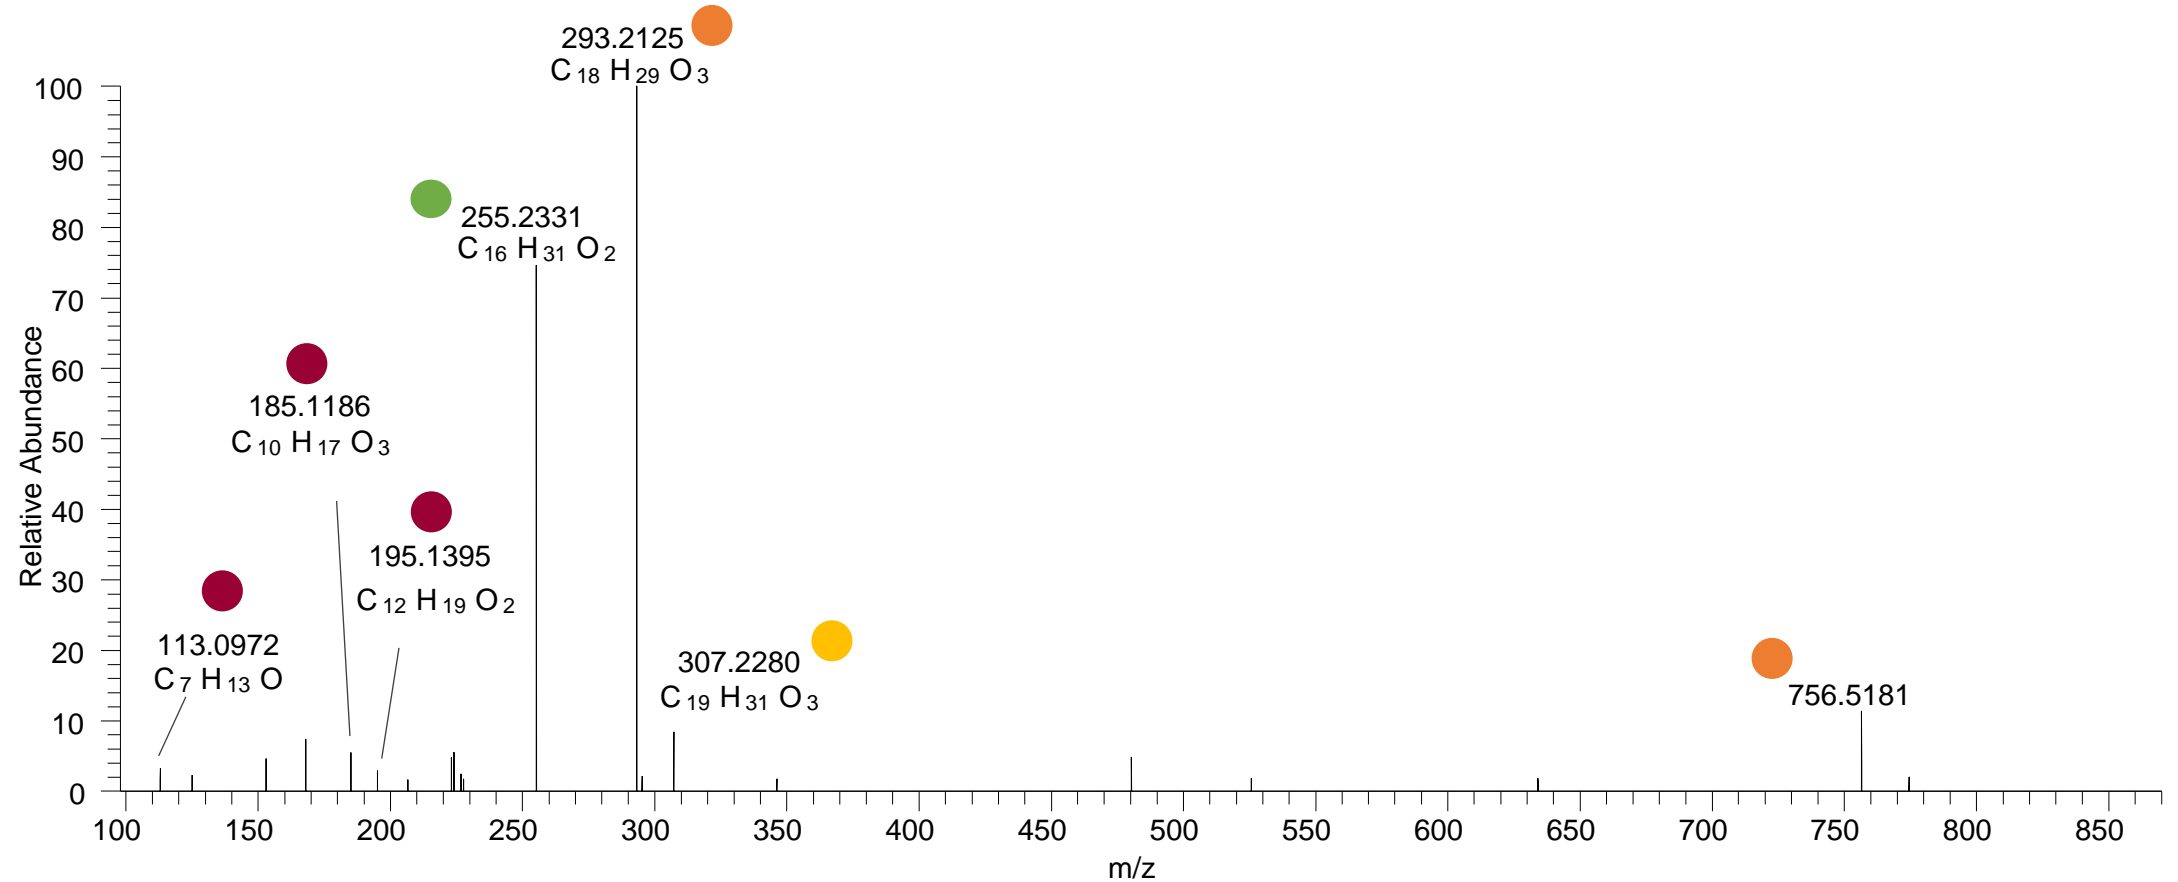

# PC(16:0\_18:1<OOH>)

[oxPC+HCOO]<sup>-</sup> XIC 836.5658 NL: 1.46E3

## RT 14.2-14.3

- Fragments containing oxFAs
- Fragments related to water loss
- Fragments not containing oxFAs
- Fragments containing methylated oxFAs
- Fragments related to CO<sub>2</sub> loss
- Position-specific fragments

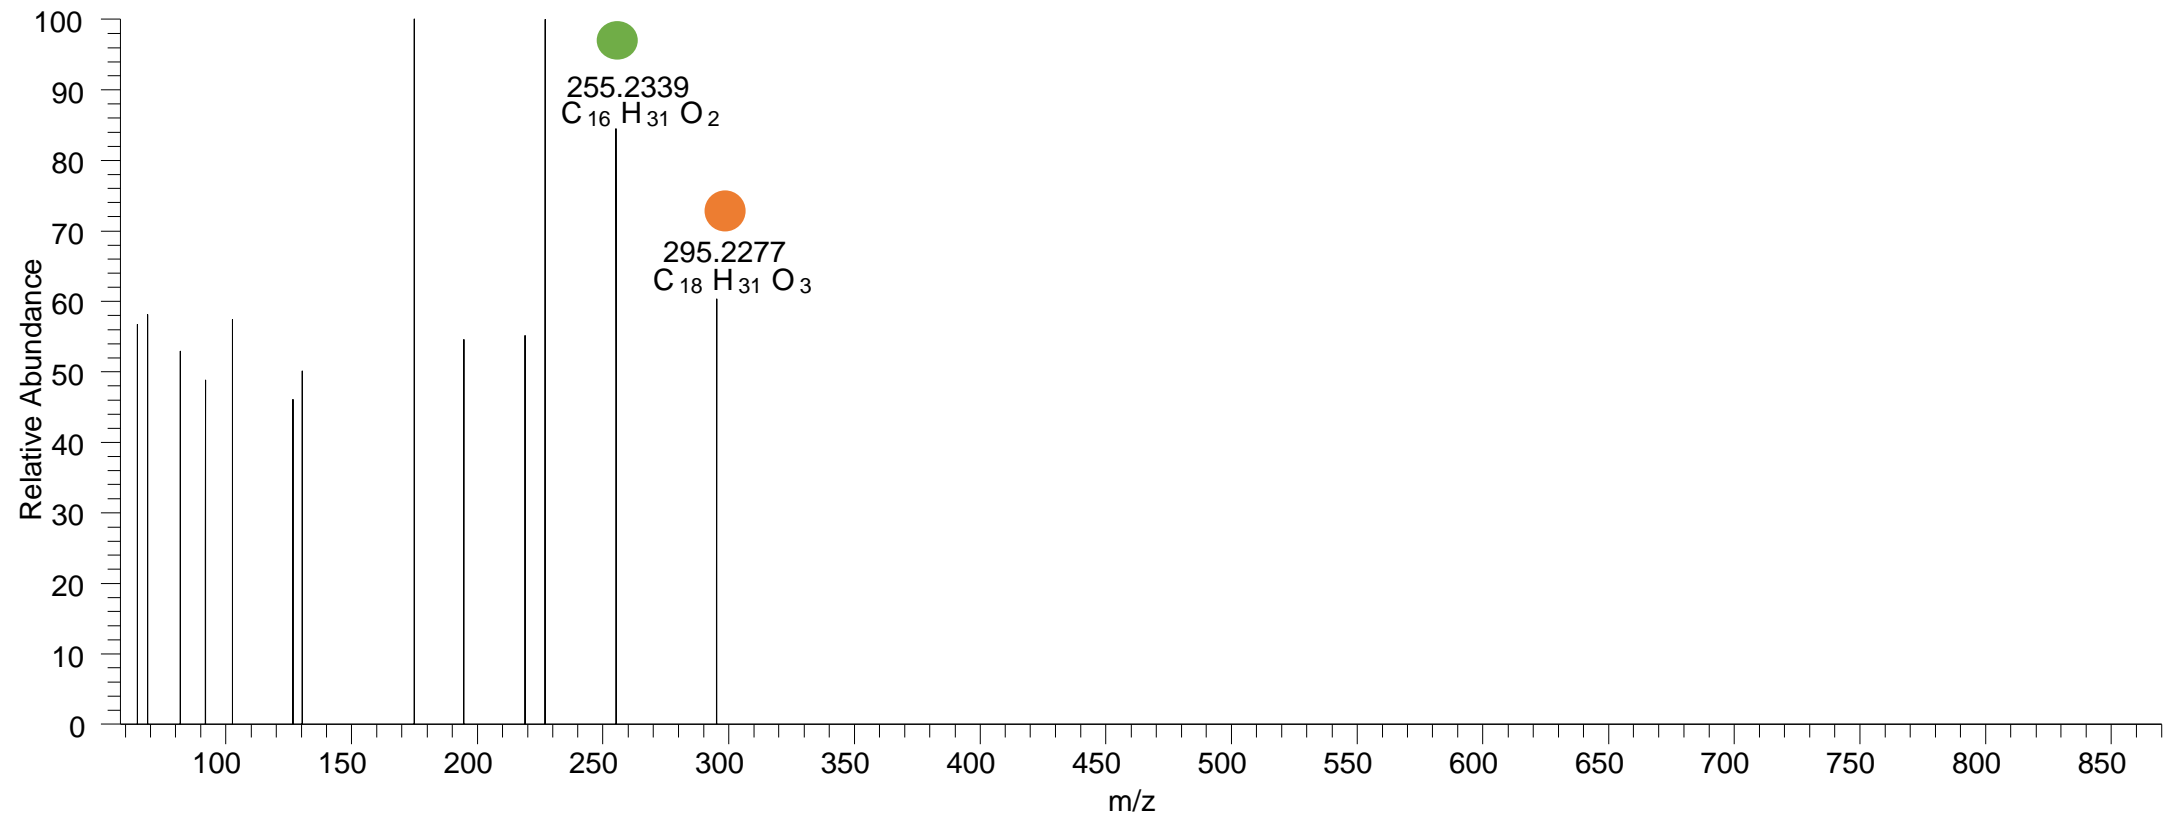

# PC(16:0\_20:5<O>)

[oxPC+HCOO]<sup>-</sup> XIC 840.5396 NL: 1.85E3

## RT 12.8

- Fragments containing oxFAs
- Fragments related to water loss
- Fragments not containing oxFAs
- Fragments containing methylated oxFAs
- Fragments related to CO<sub>2</sub> loss
- Position-specific fragments

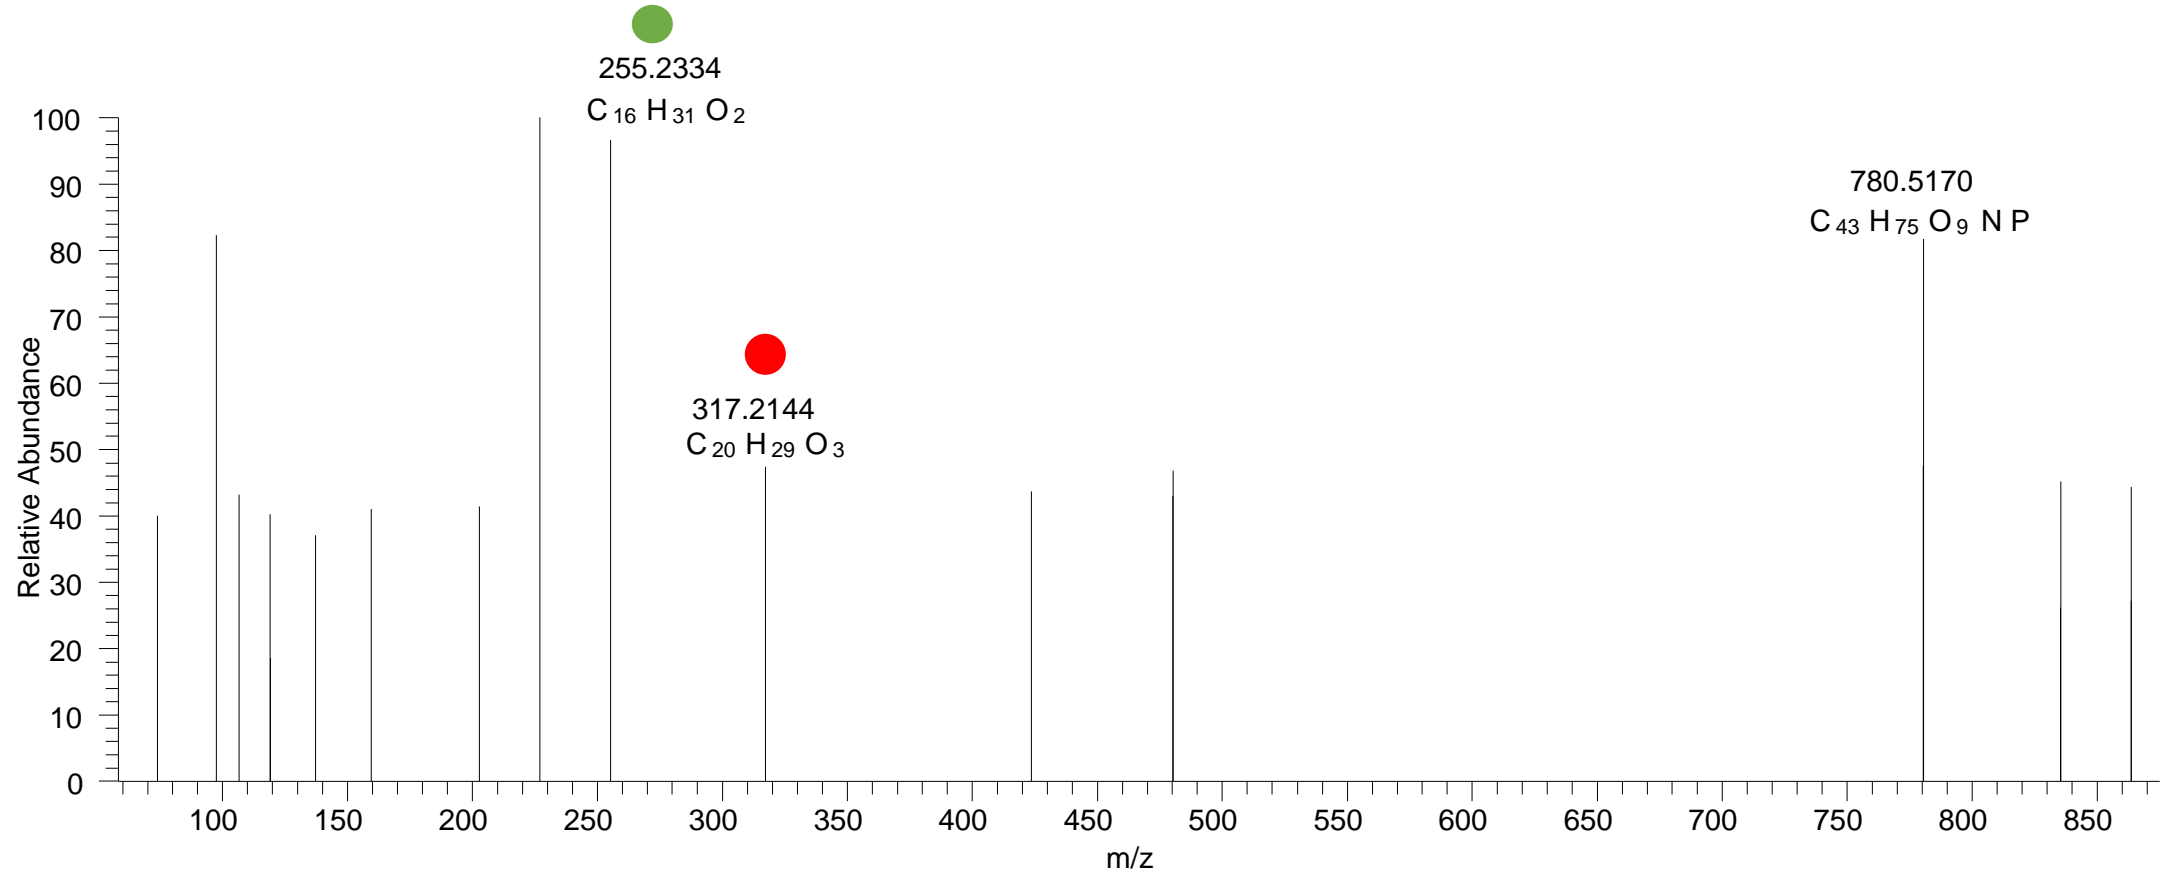

# PC(16:0\_20:4<OH{13}>)

[oxPC+HCOO]<sup>-</sup> XIC 842.5553 NL: 5.08E3

## RT 13.2

- Fragments containing oxFAs
- Fragments related to water loss
- Fragments not containing oxFAs
- Fragments containing methylated oxFAs
- Fragments related to CO<sub>2</sub> loss
- Position-specific fragments

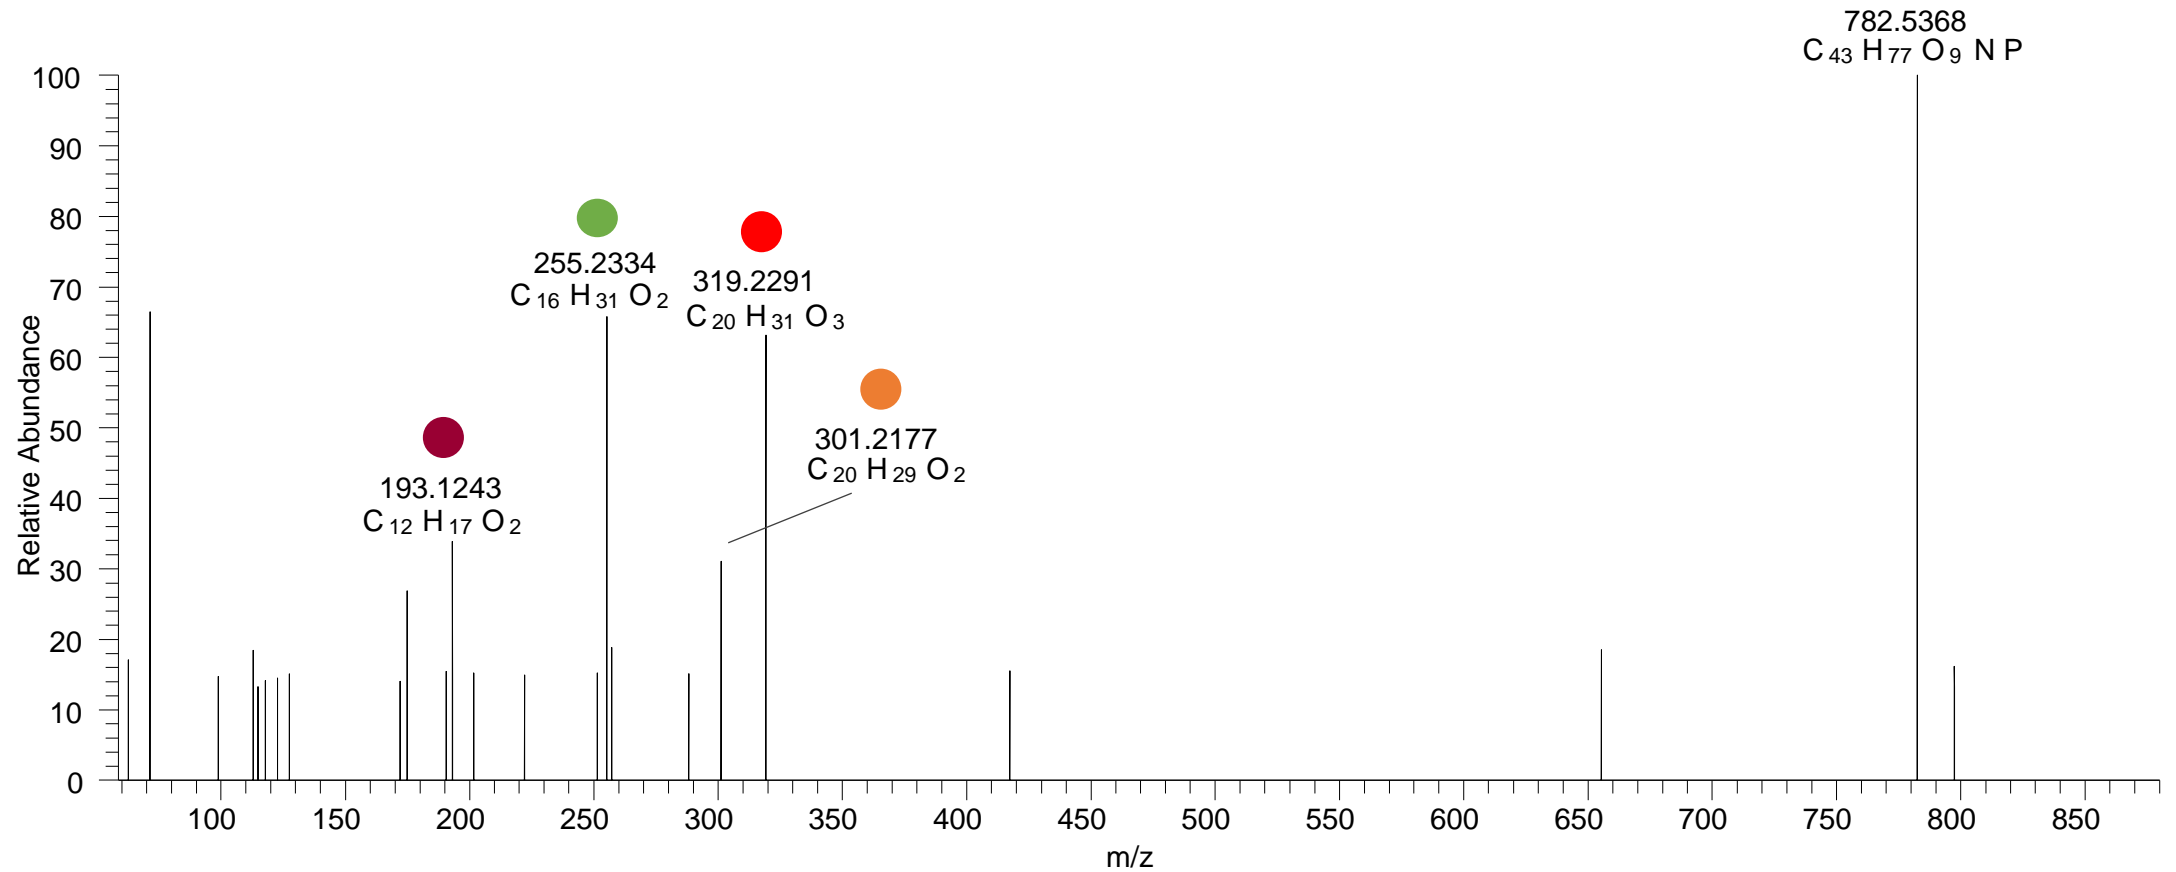

# PC(16:0\_20:4<OH{15}>)

[oxPC+HCOO]- XIC 842.5553 NL: 1.94E4

## RT 13.5

- Fragments containing oxFAs
- Fragments related to water loss
- Fragments not containing oxFAs
- Fragments containing methylated oxFAs
- Fragments related to CO<sub>2</sub> loss
- Position-specific fragments

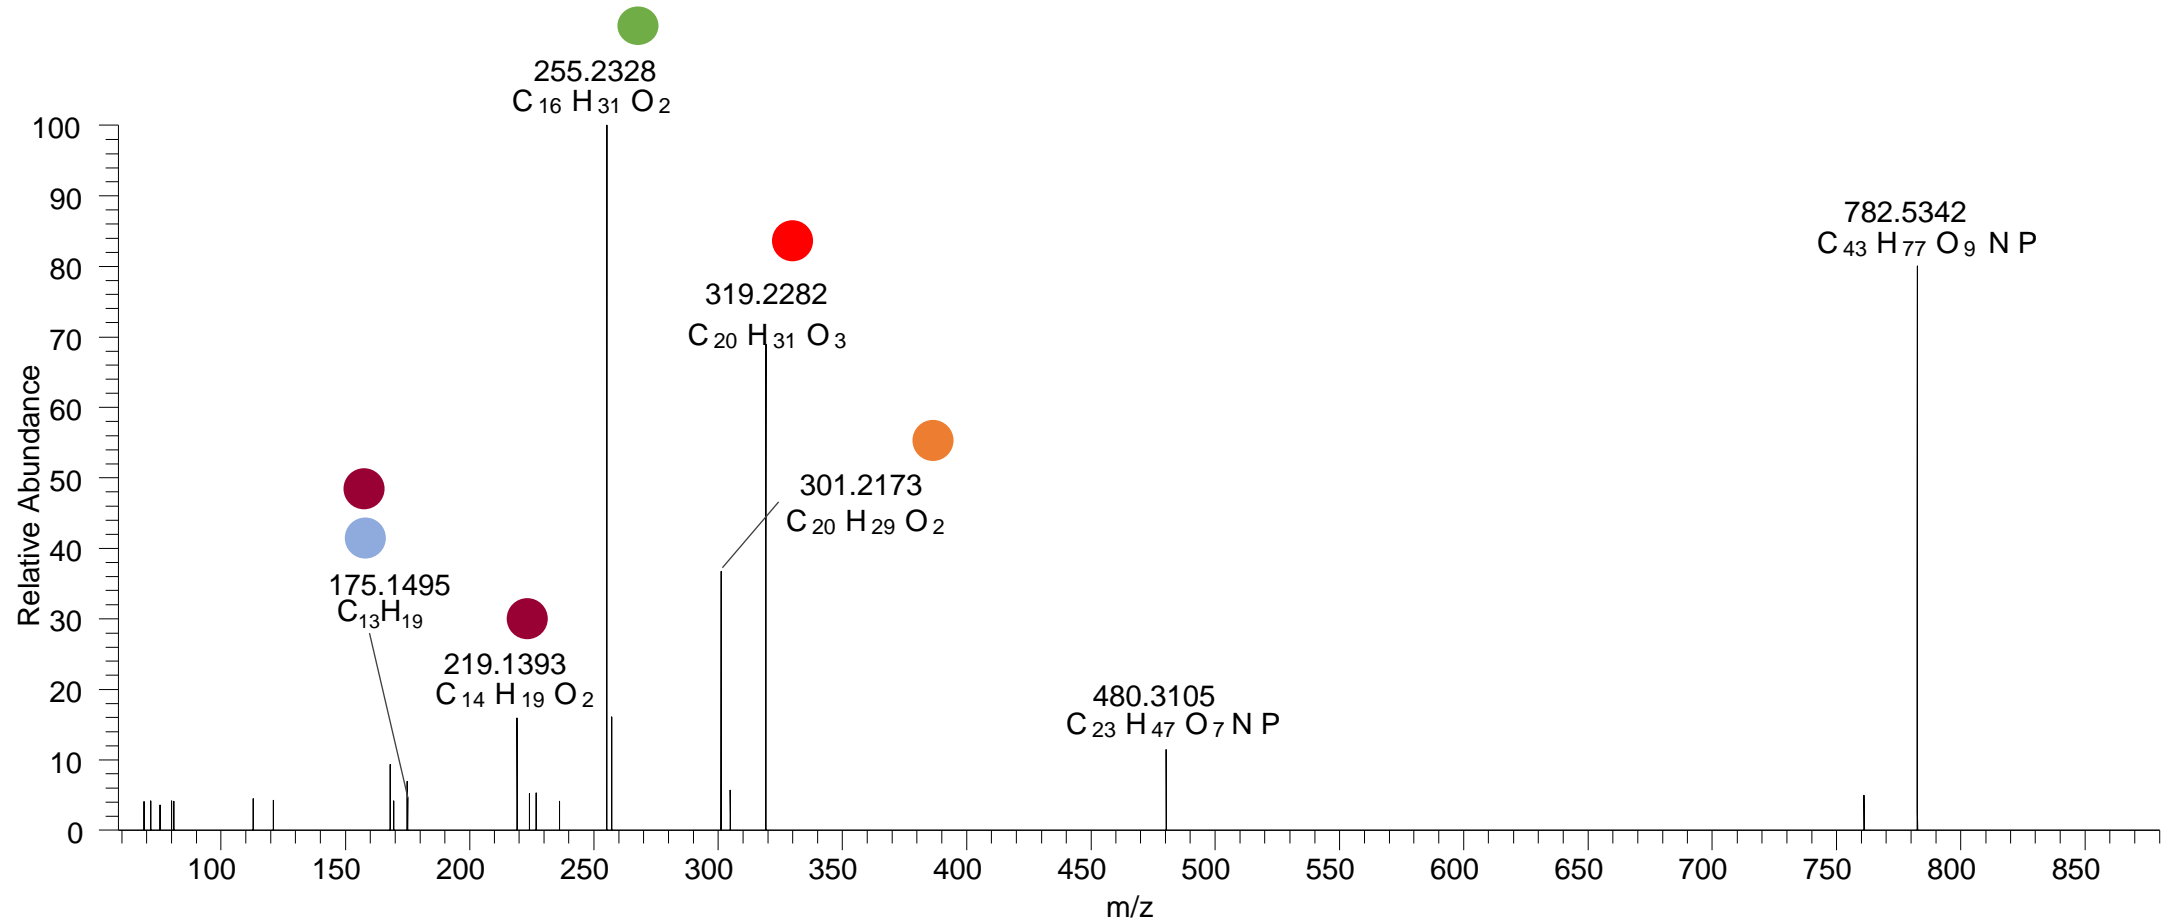

# PC(16:0\_20:4<OH{11}>)

[oxPC+HCOO]<sup>-</sup> XIC 842.5553 NL: 2.09E4

## RT 13.8

- Fragments containing oxFAs
- Fragments related to water loss
- Fragments not containing oxFAs
- Fragments containing methylated oxFAs
- Fragments related to CO<sub>2</sub> loss
- Position-specific fragments

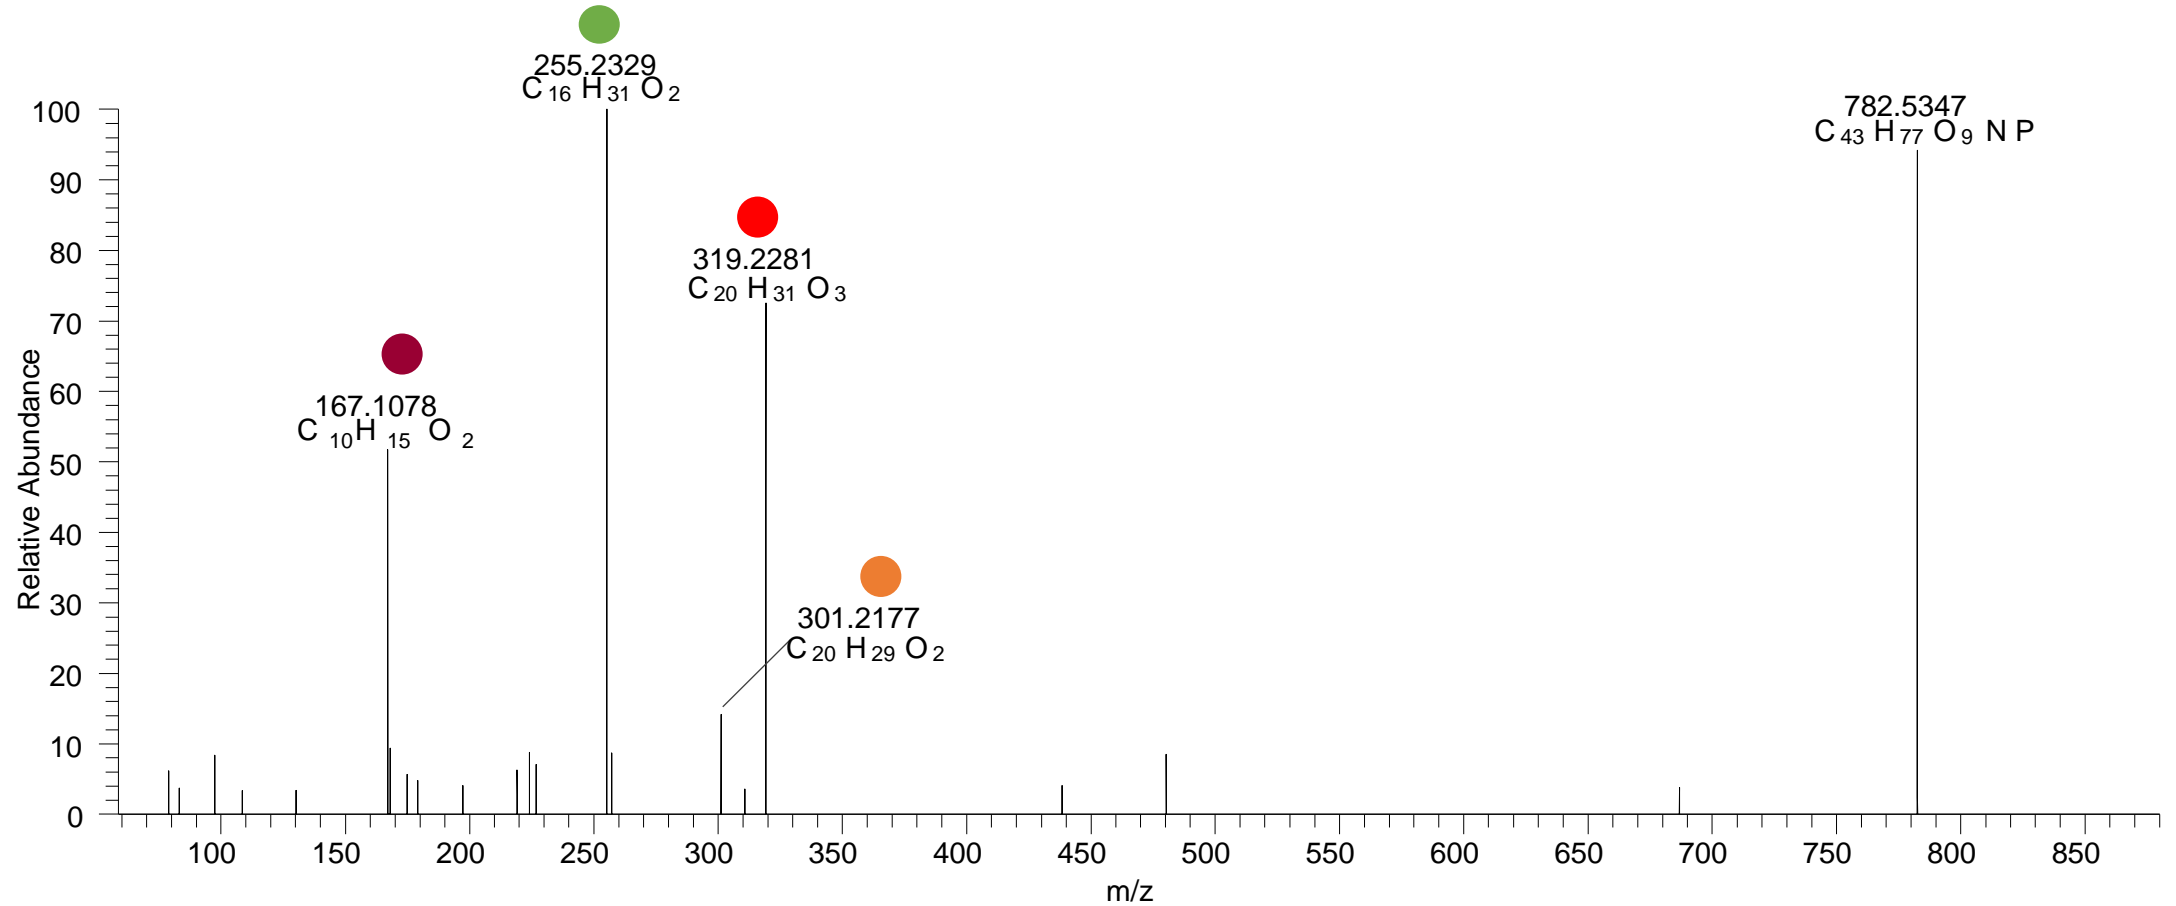

PC(16:0\_20:4<OH{11}>)  
PC(16:0\_20:4<OH{12}>)  
RT 14.0

[oxPC+HCOO]<sup>-</sup> XIC 842.5553 NL: 3.42E4

- Fragments containing oxFAs
- Fragments related to water loss
- Fragments not containing oxFAs
- Fragments containing methylated oxFAs
- Fragments related to CO<sub>2</sub> loss
- Position-specific fragments

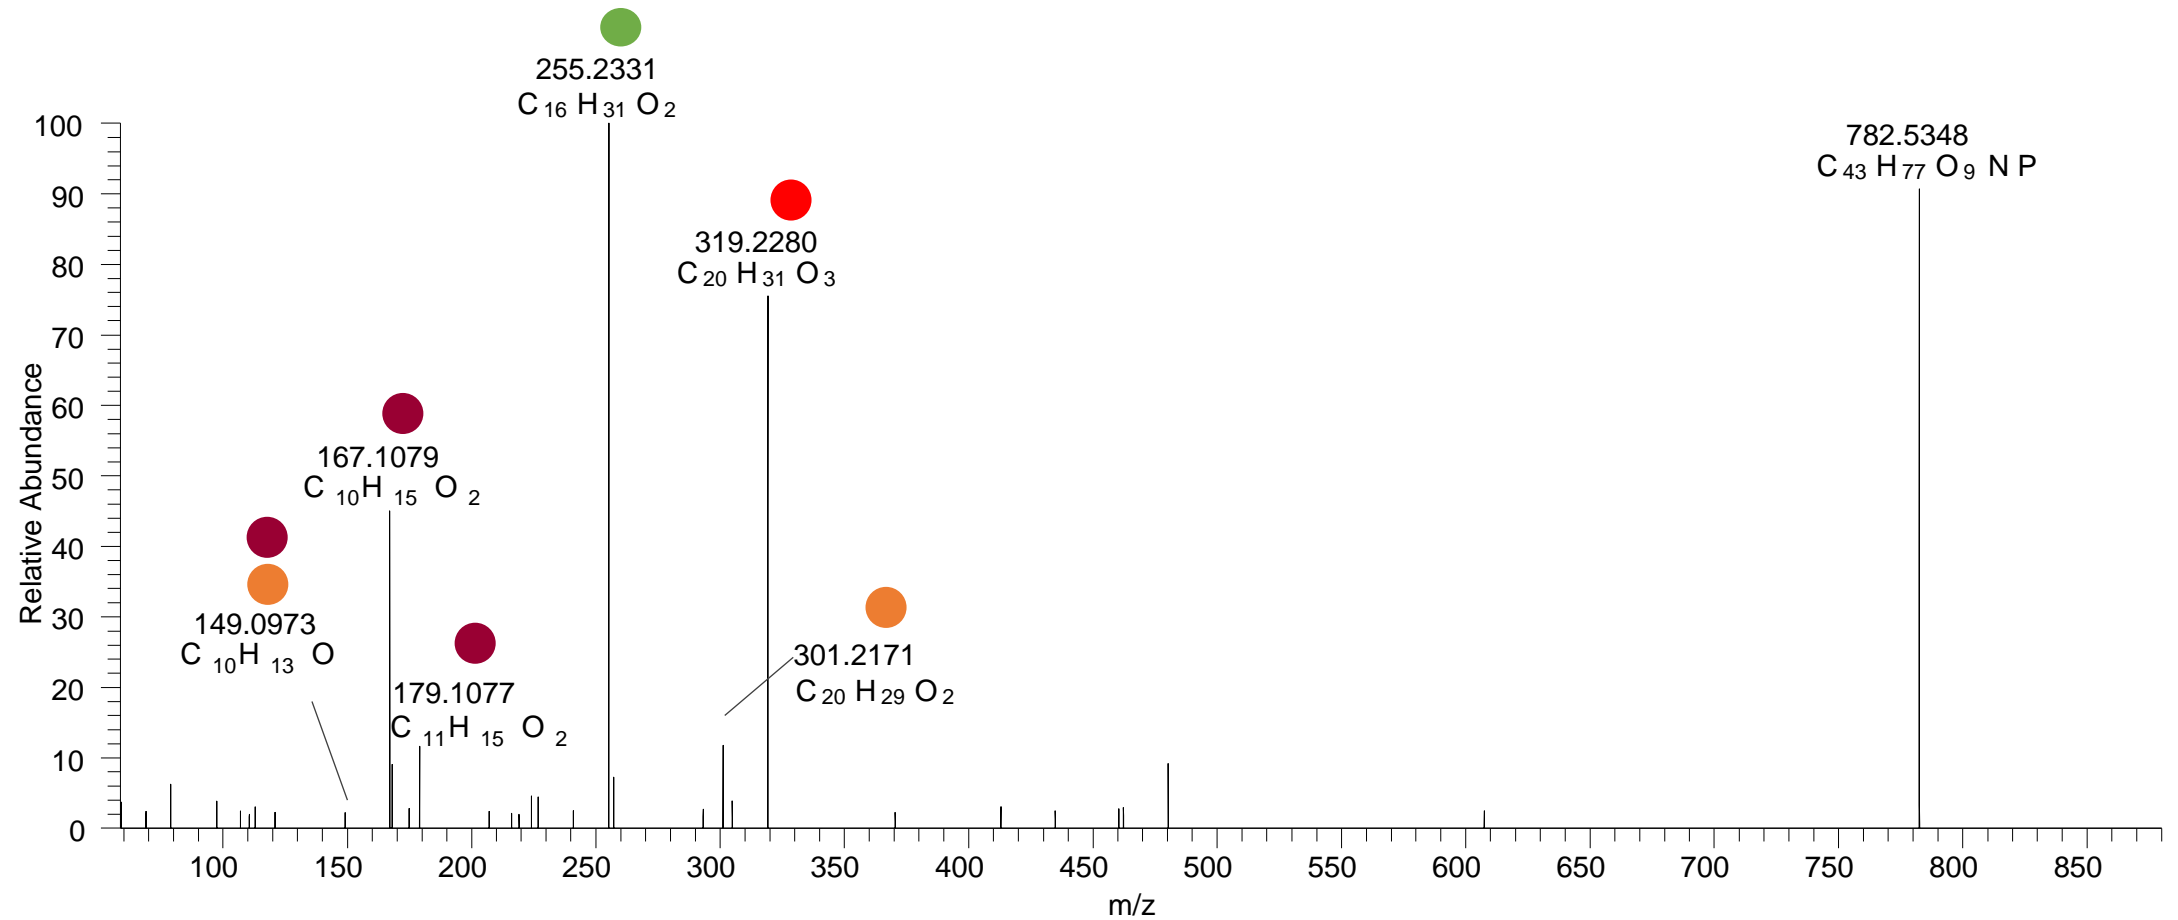



# PC(16:0\_20:4<OH{8}>) PC(16:0\_20:4<OH{7}>) RT 14.3-14.4

[oxPC+HCOO]- XIC 842.5553 NL: 2.72E4

- Fragments containing oxFAs
- Fragments related to water loss
- Fragments not containing oxFAs
- Fragments containing methylated oxFAs
- Fragments related to CO<sub>2</sub> loss
- Position-specific fragments

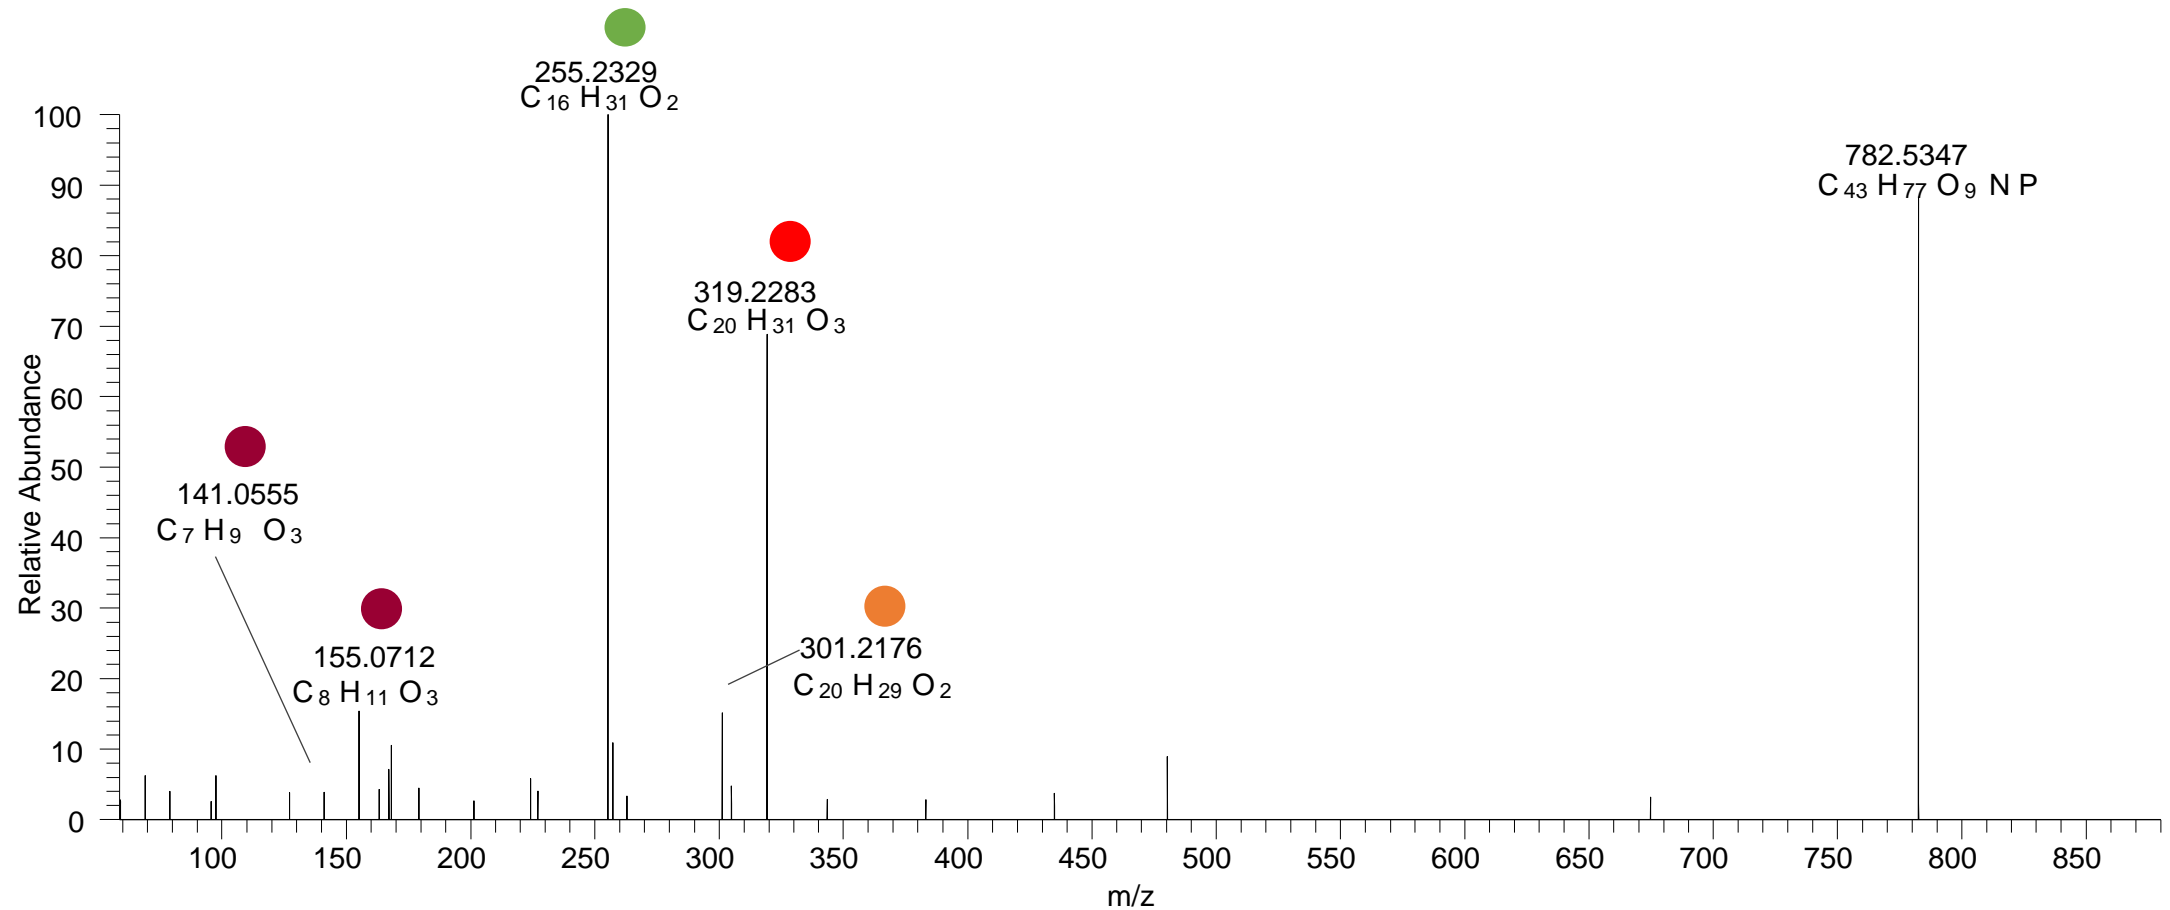

# PC(16:0\_20:4<OH{5}>)

[oxPC+HCOO]<sup>-</sup> XIC 842.5553 NL: 9.39E3

## RT 15.0

- Fragments containing oxFAs
- Fragments related to water loss
- Fragments not containing oxFAs
- Fragments containing methylated oxFAs
- Fragments related to CO<sub>2</sub> loss
- Position-specific fragments

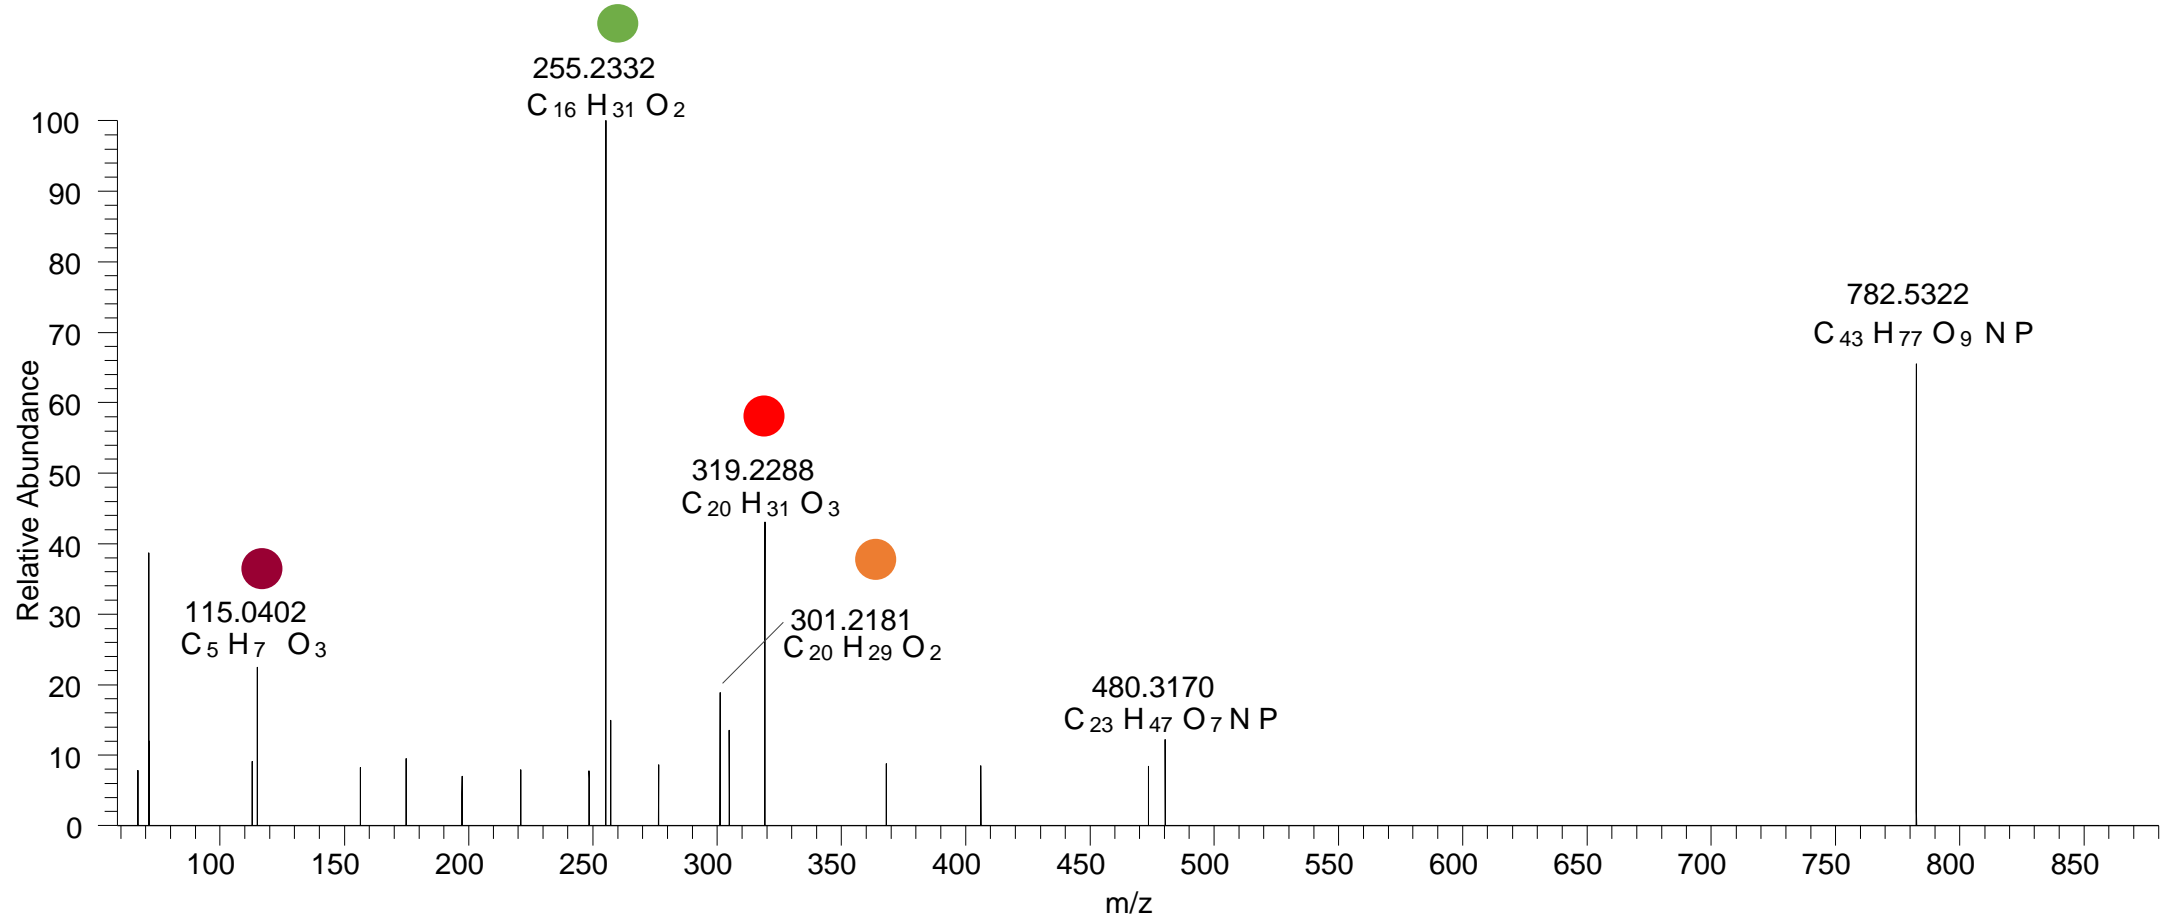

# PC(18:1\_18:2<O>)

[oxPC+HCOO]<sup>-</sup> XIC 844.5709 NL: 2.30E3

## RT 13.0

- Fragments containing oxFAs
- Fragments related to water loss
- Fragments not containing oxFAs
- Fragments containing methylated oxFAs
- Fragments related to CO<sub>2</sub> loss
- Position-specific fragments

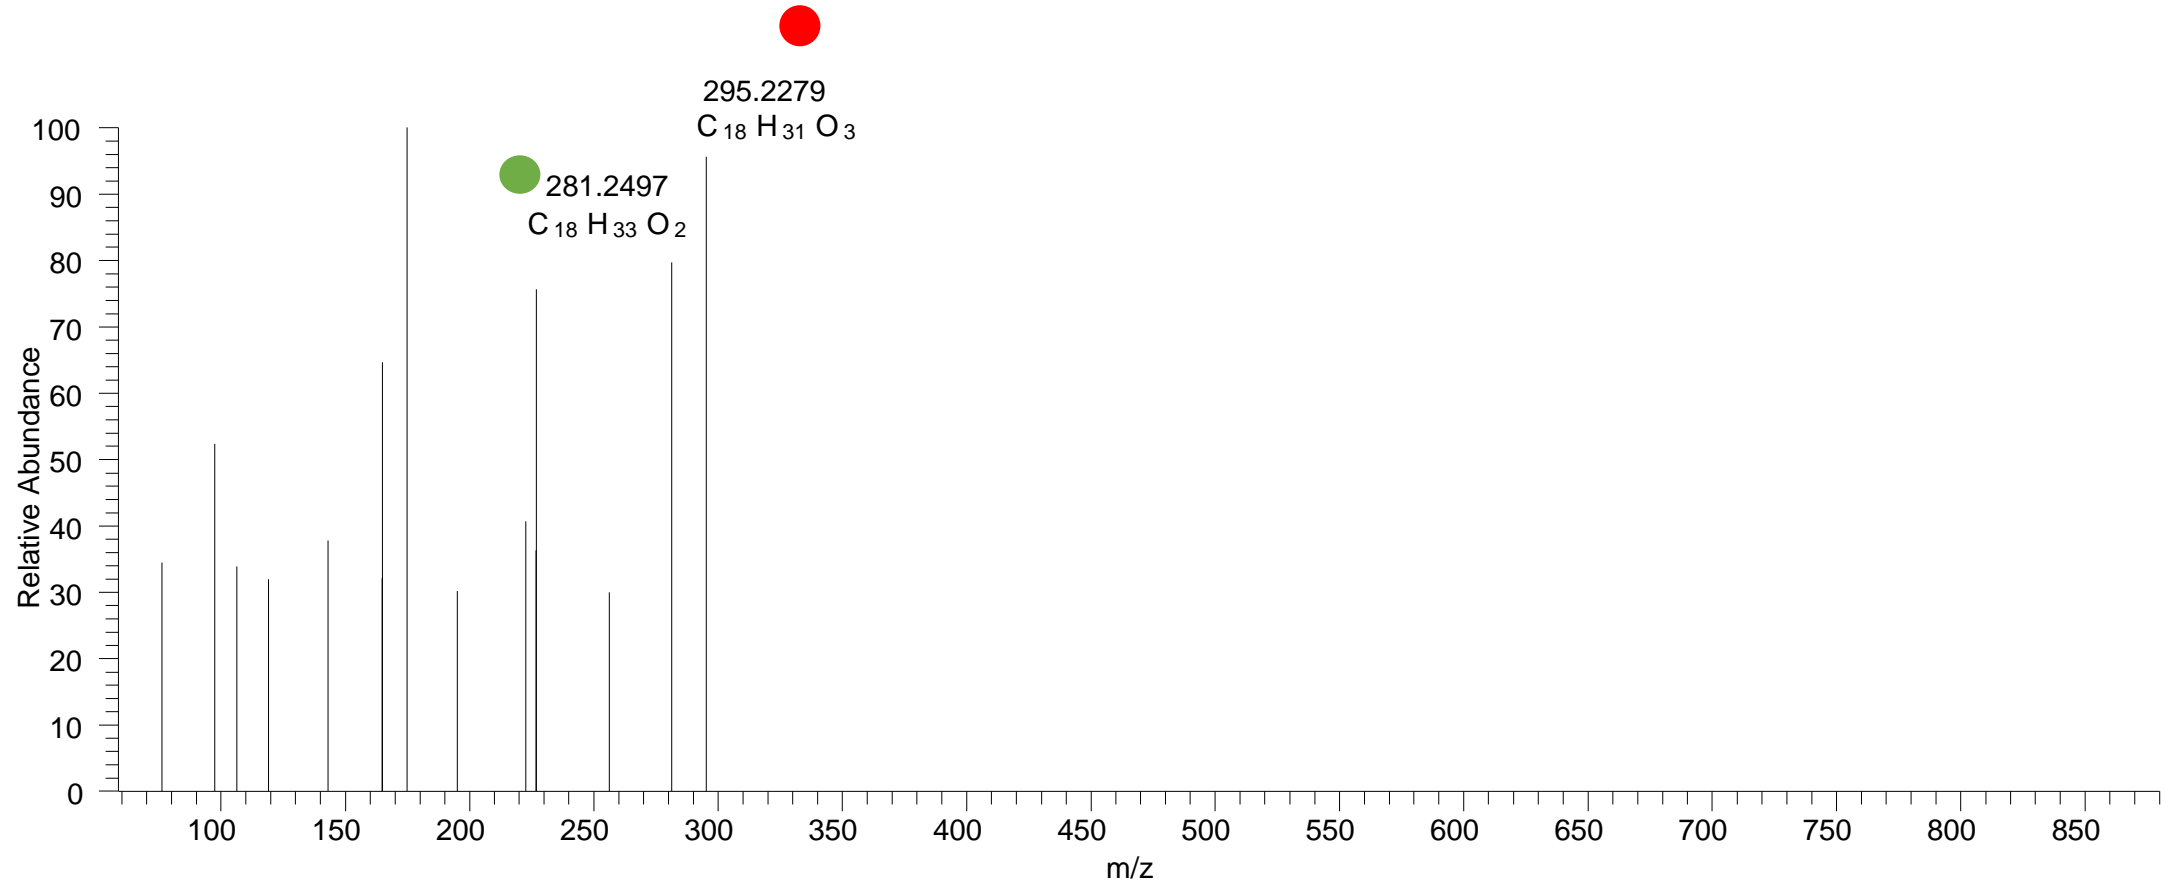

# PC(16:0\_20:3<OH{11}>) PC(16:0\_20:3<OH{12}>) RT 14.2-14.3

[oxPC+HCOO]- XIC 844.5709 NL: 2.58E4

- Fragments containing oxFAs
- Fragments related to water loss
- Fragments not containing oxFAs
- Fragments containing methylated oxFAs
- Fragments related to CO<sub>2</sub> loss
- Position-specific fragments

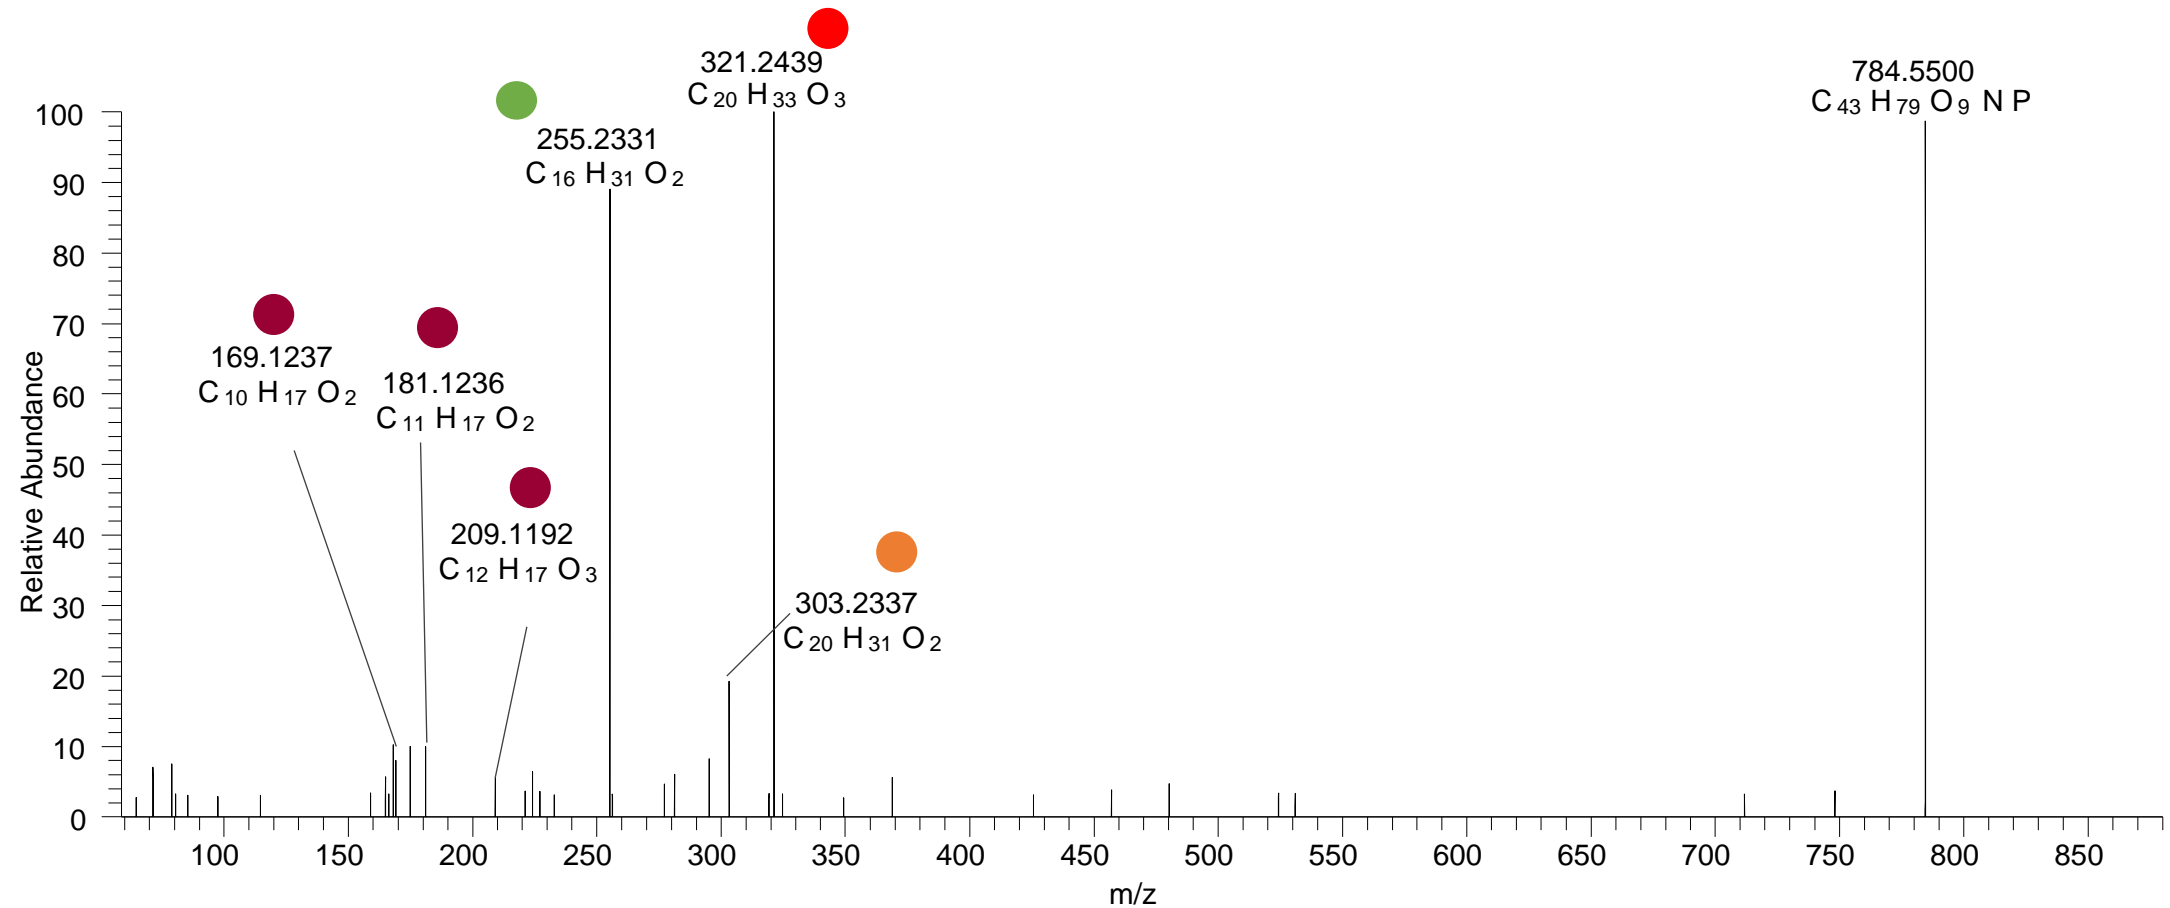

# PC(16:0\_20:4<2O>)

[oxPC+HCOO]<sup>-</sup> XIC 858.5502 NL: 4.43E3

## RT 11.2, 12.0, 12.6

- Fragments containing oxFAs
- Fragments related to water loss
- Fragments not containing oxFAs
- Fragments containing methylated oxFAs
- Fragments related to CO<sub>2</sub> loss
- Position-specific fragments

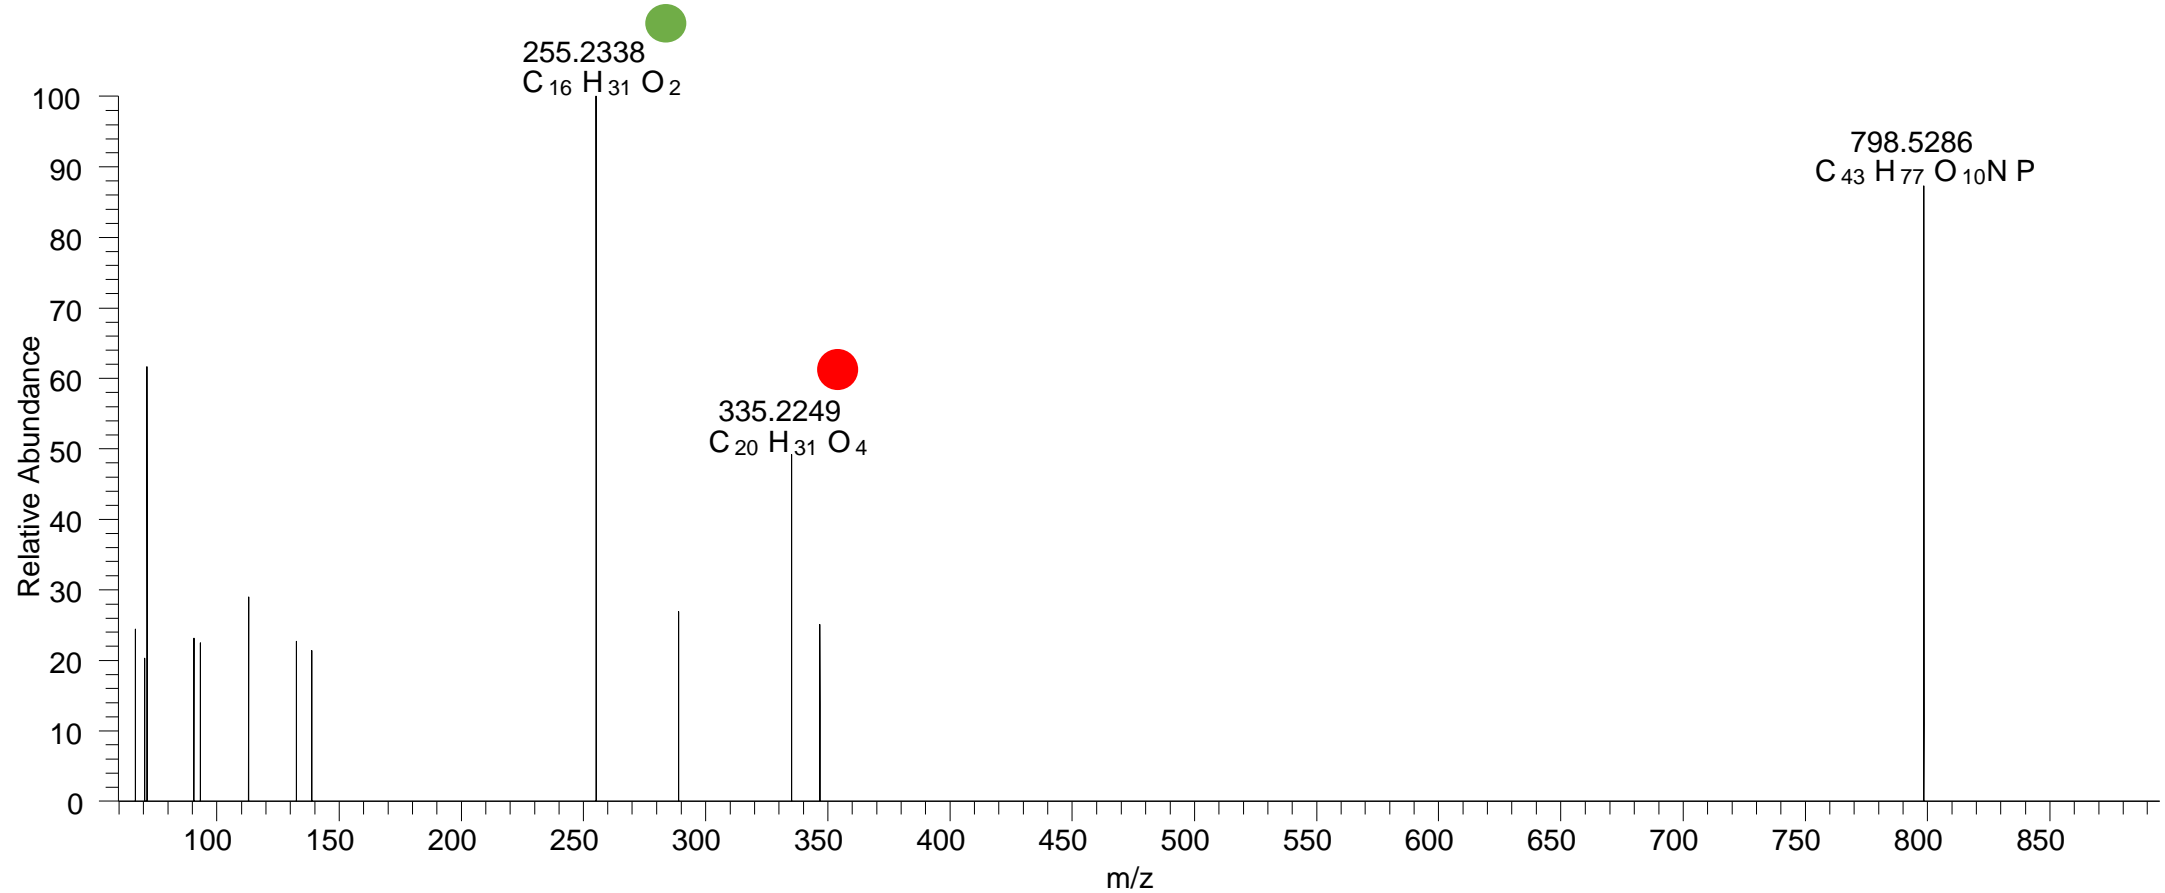

# PC(16:0\_20:4<OOH{15}>)

[oxPC+HCOO]<sup>-</sup> XIC 858.5502 NL: 9.78E3

## RT 13.6

- Fragments containing oxFAs
- Fragments related to water loss
- Fragments not containing oxFAs
- Fragments containing methylated oxFAs
- Fragments related to CO<sub>2</sub> loss
- Position-specific fragments

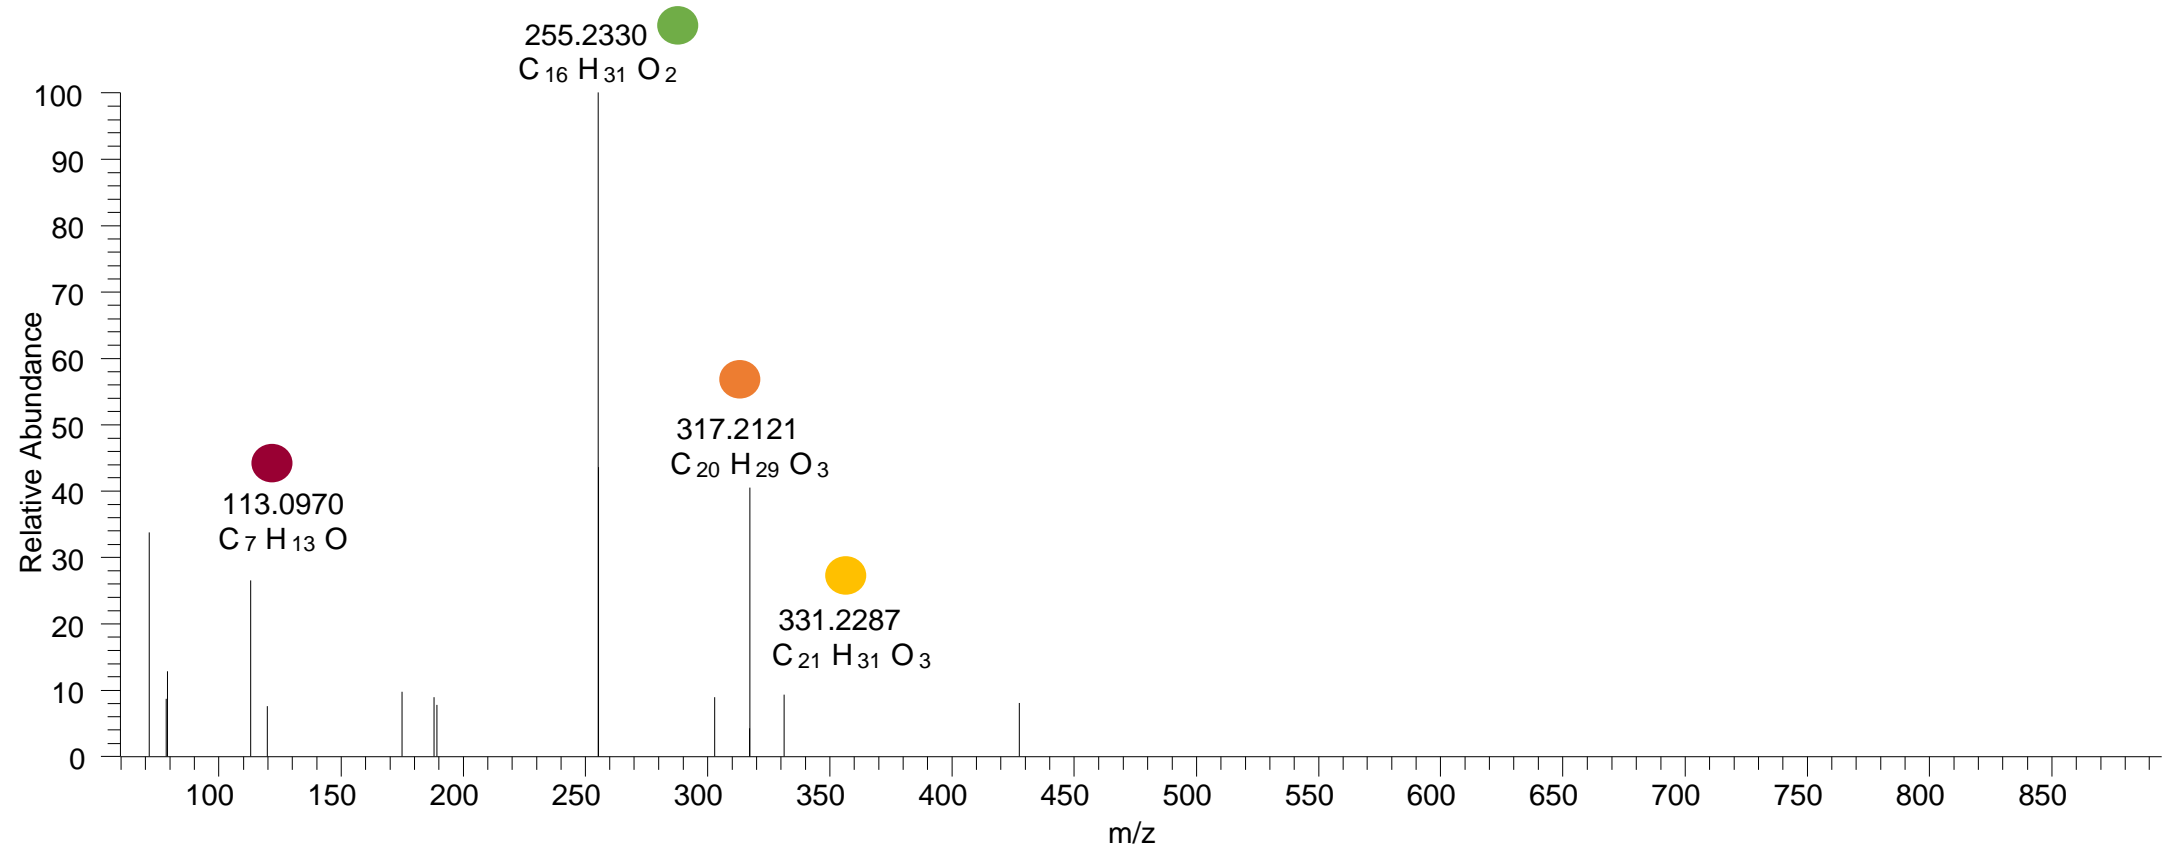

# PC(16:0\_20:4<OOH{12}>)

[oxPC+HCOO]<sup>-</sup> XIC 858.5502 NL: 1.37E4

## RT 13.9

- Fragments containing oxFAs
- Fragments related to water loss
- Fragments not containing oxFAs
- Fragments containing methylated oxFAs
- Fragments related to CO<sub>2</sub> loss
- Position-specific fragments

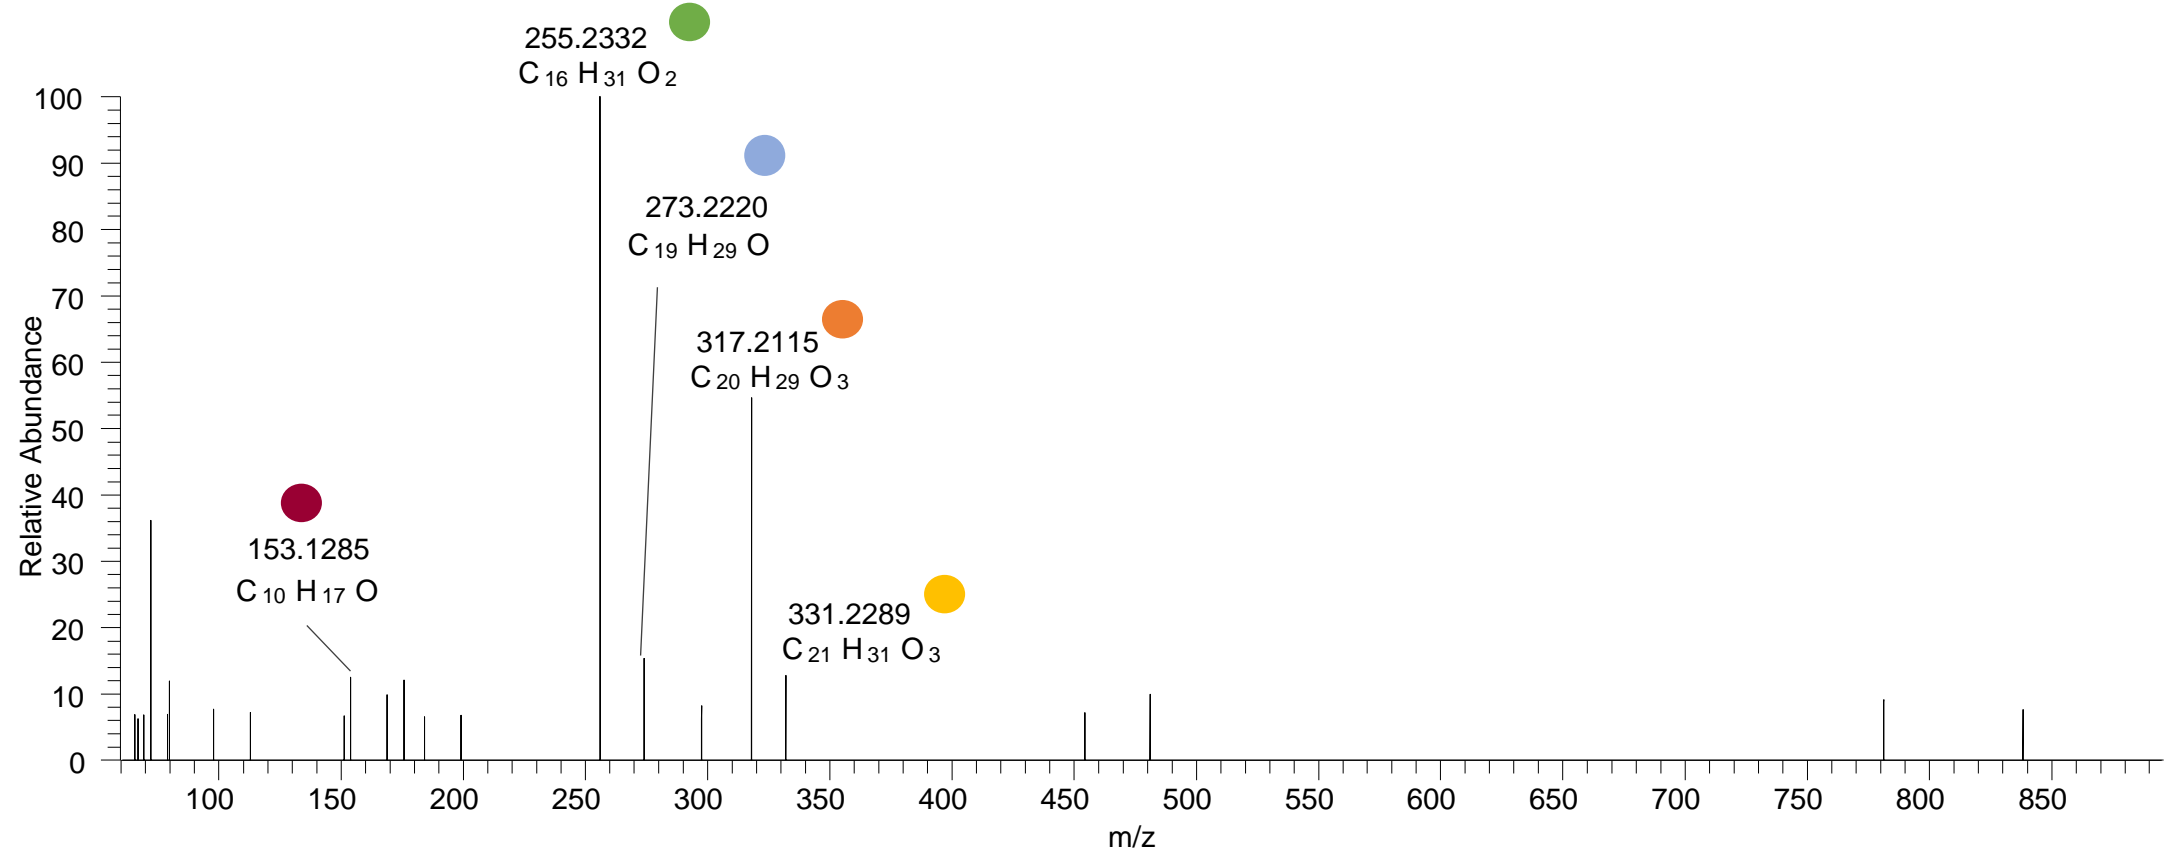

# PC(16:0\_20:4<OOH{7}>)

[oxPC+HCOO]<sup>-</sup> XIC 858.5502 NL: 1.06E4

## RT 14.4

- Fragments containing oxFAs
- Fragments related to water loss
- Fragments not containing oxFAs
- Fragments containing methylated oxFAs
- Fragments related to CO<sub>2</sub> loss
- Position-specific fragments

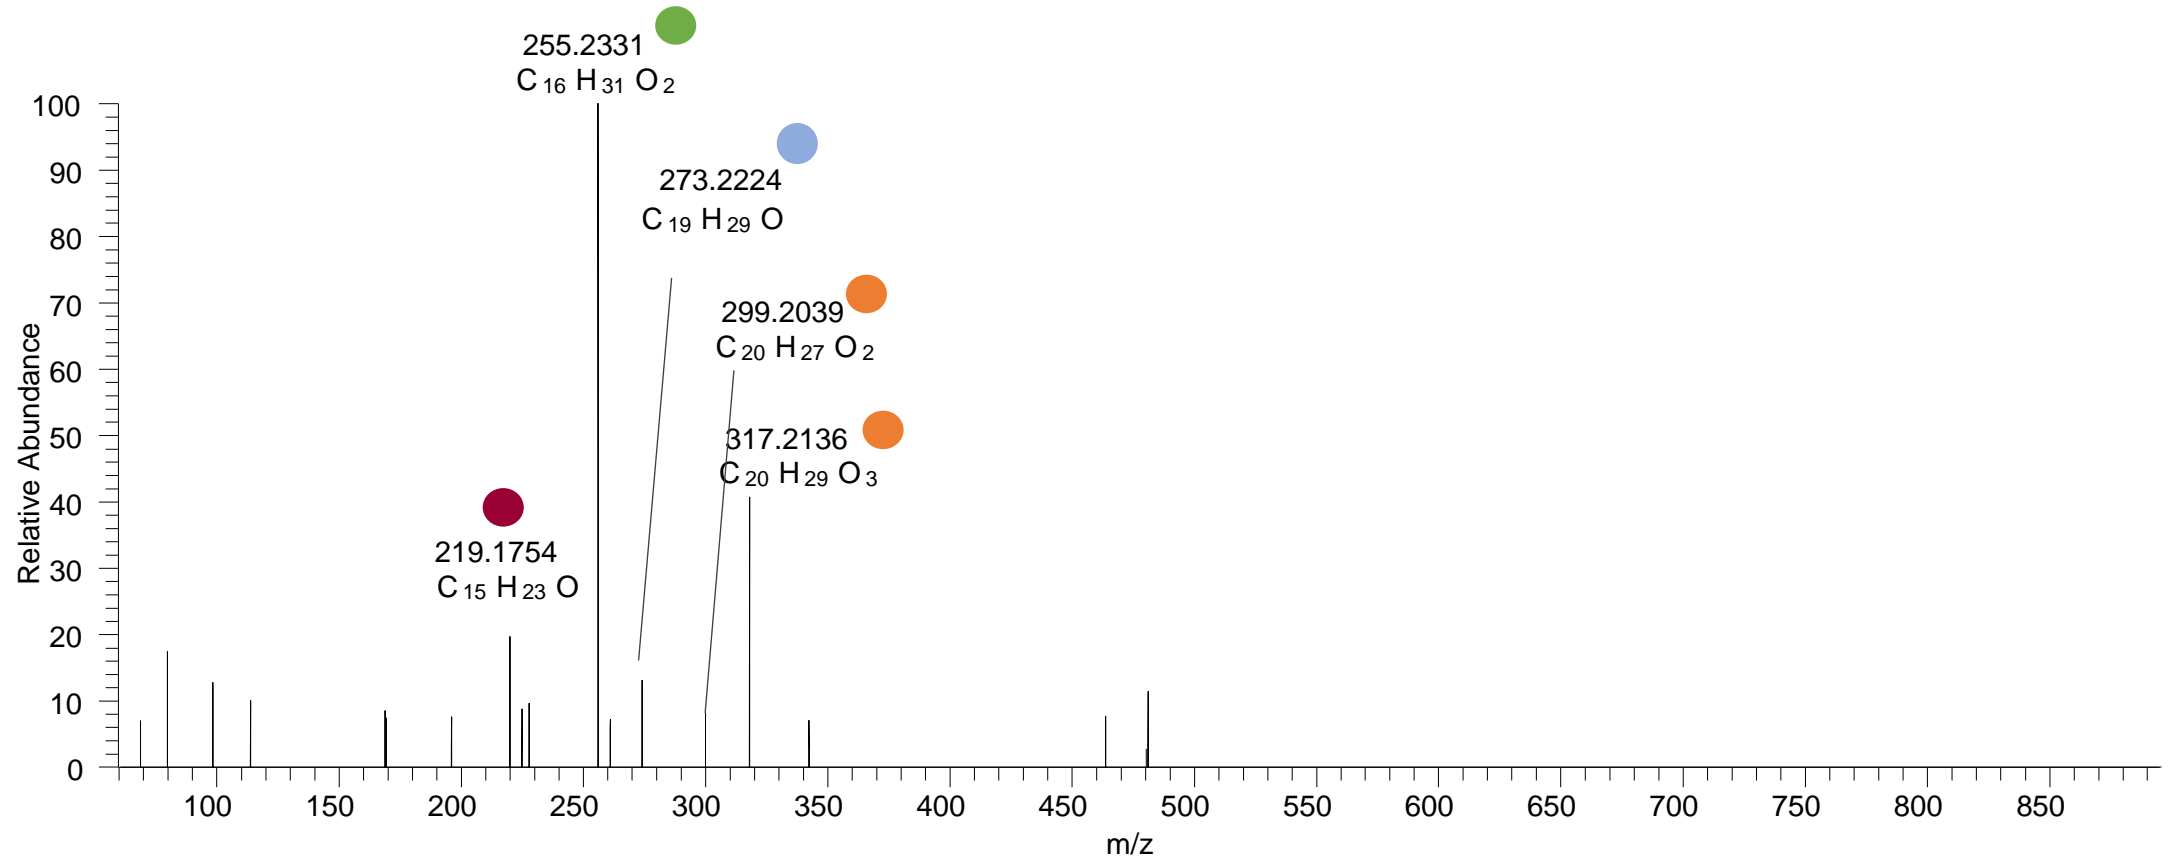



PC(18:1\_18:2<OOH>)  
PC(16:0\_20:3<OOH>)  
RT 14.1

[oxPC+HCOO]<sup>-</sup> XIC 860.5658 NL: 7.47E3

- Fragments containing oxFAs
- Fragments related to water loss
- Fragments not containing oxFAs
- Fragments containing methylated oxFAs
- Fragments related to CO<sub>2</sub> loss
- Position-specific fragments

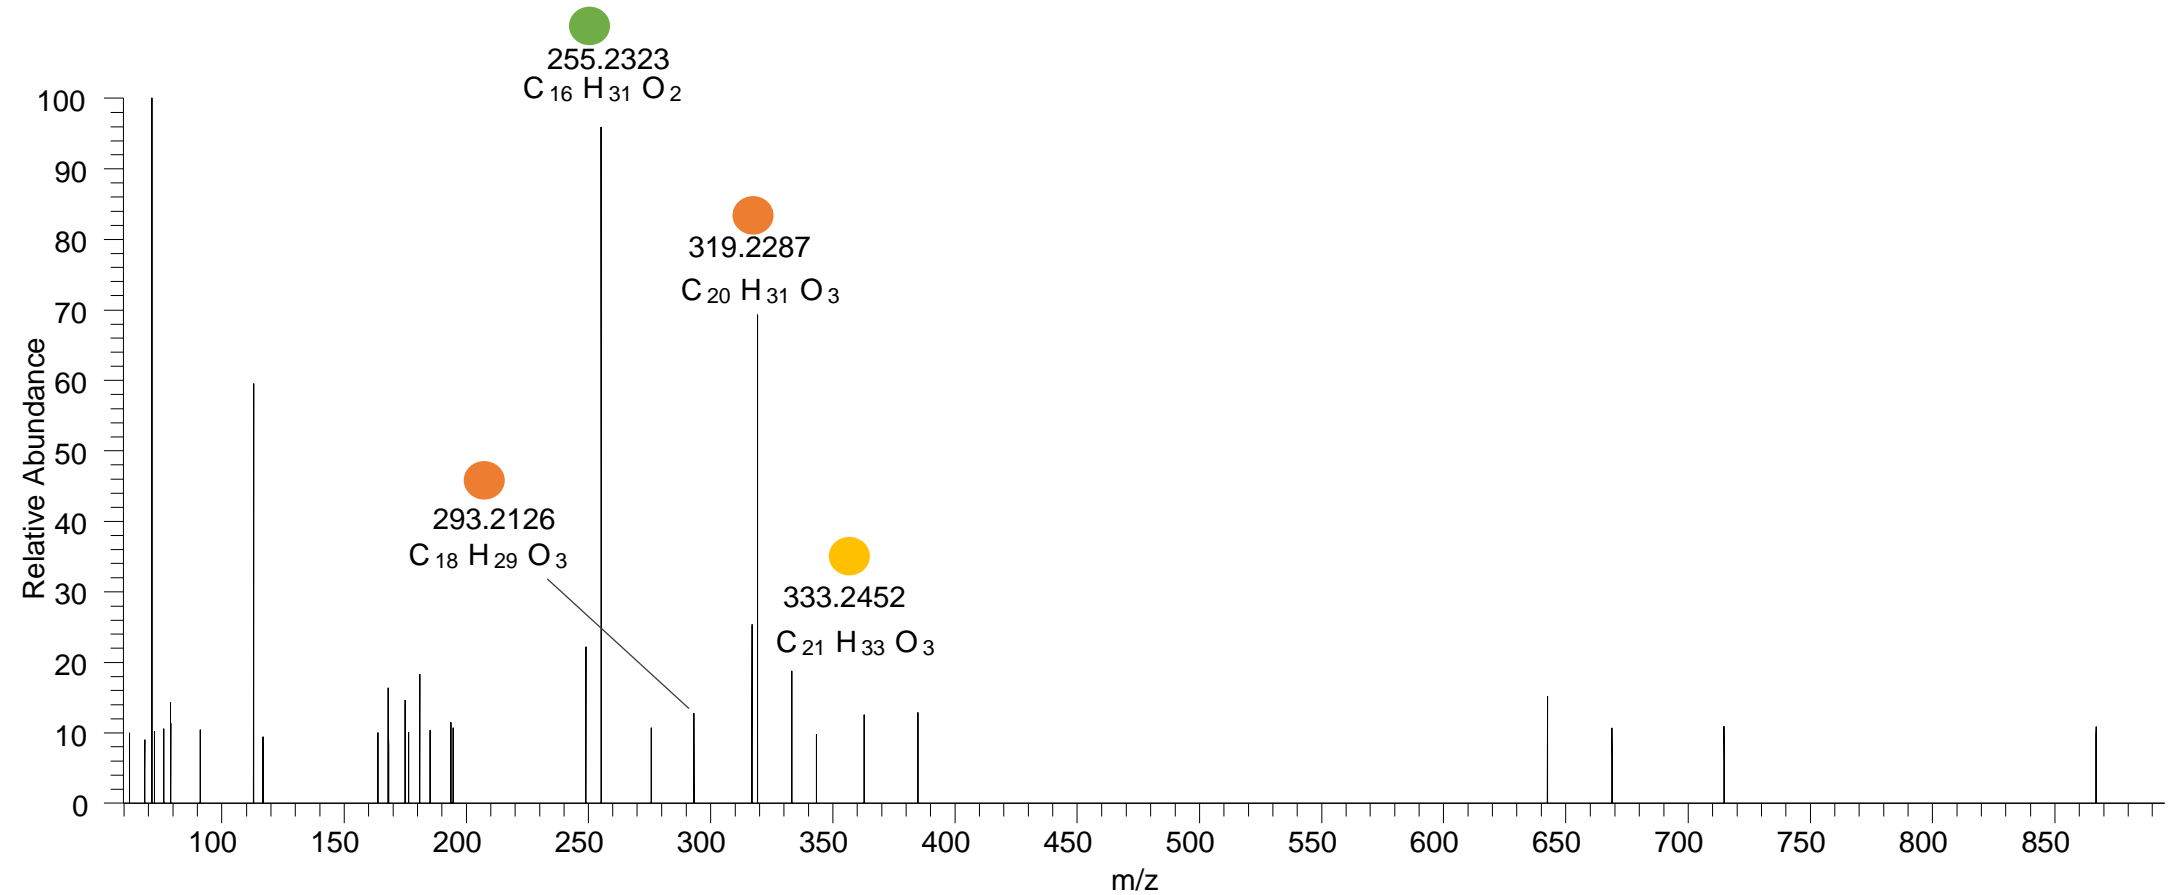

# PC(16:0\_20:3<OOH>)

[oxPC+HCOO]<sup>-</sup> XIC 860.5658 NL: 8.89E3

## RT 14.2

- Fragments containing oxFAs
- Fragments related to water loss
- Fragments not containing oxFAs
- Fragments containing methylated oxFAs
- Fragments related to CO<sub>2</sub> loss
- Position-specific fragments

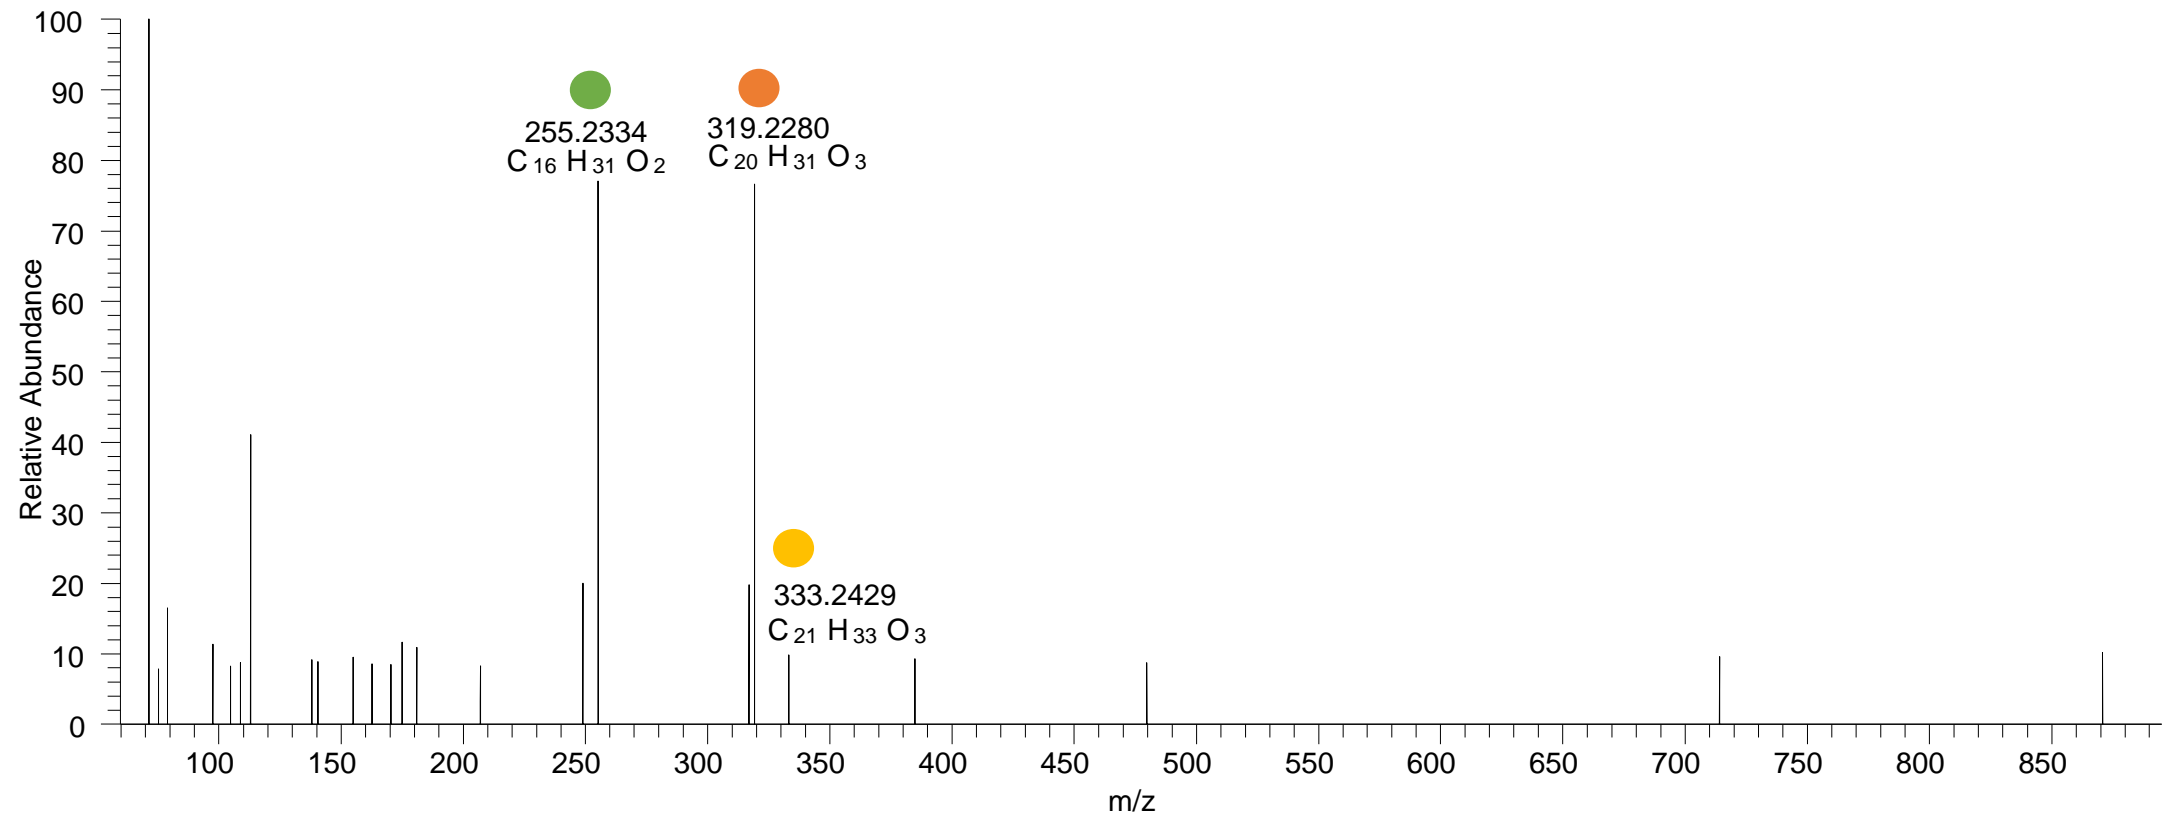

# PC(18:0\_18:2<2O>)

[oxPC+HCOO]<sup>-</sup> XIC 862.5815 NL: 1.57E3

## RT 13.6

- Fragments containing oxFAs
- Fragments related to water loss
- Fragments not containing oxFAs
- Fragments containing methylated oxFAs
- Fragments related to CO<sub>2</sub> loss
- Position-specific fragments

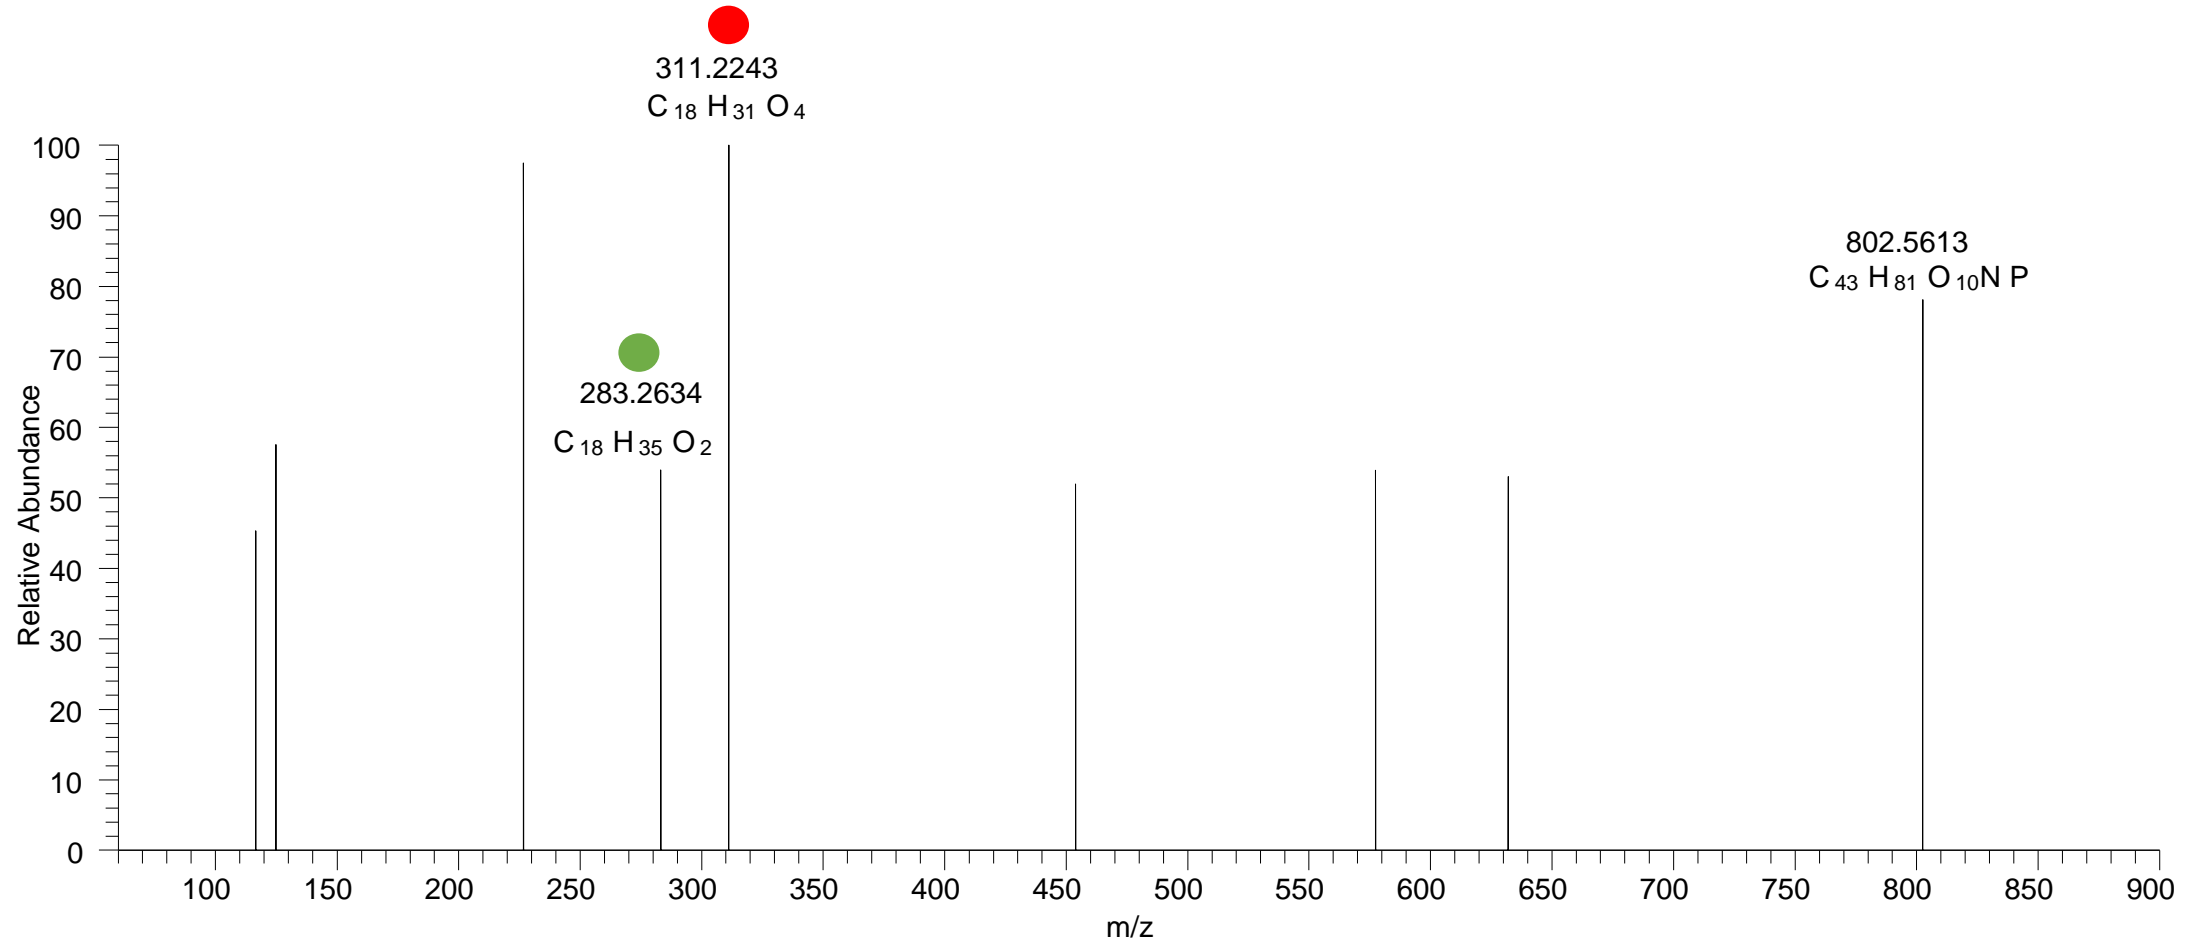

# PC(18:0\_18:2<OOH>)

[oxPC+HCOO]<sup>-</sup> XIC 862.5815 NL: 2.32E3

## RT 14.5

- Fragments containing oxFAs
- Fragments related to water loss
- Fragments not containing oxFAs
- Fragments containing methylated oxFAs
- Fragments related to CO<sub>2</sub> loss
- Position-specific fragments

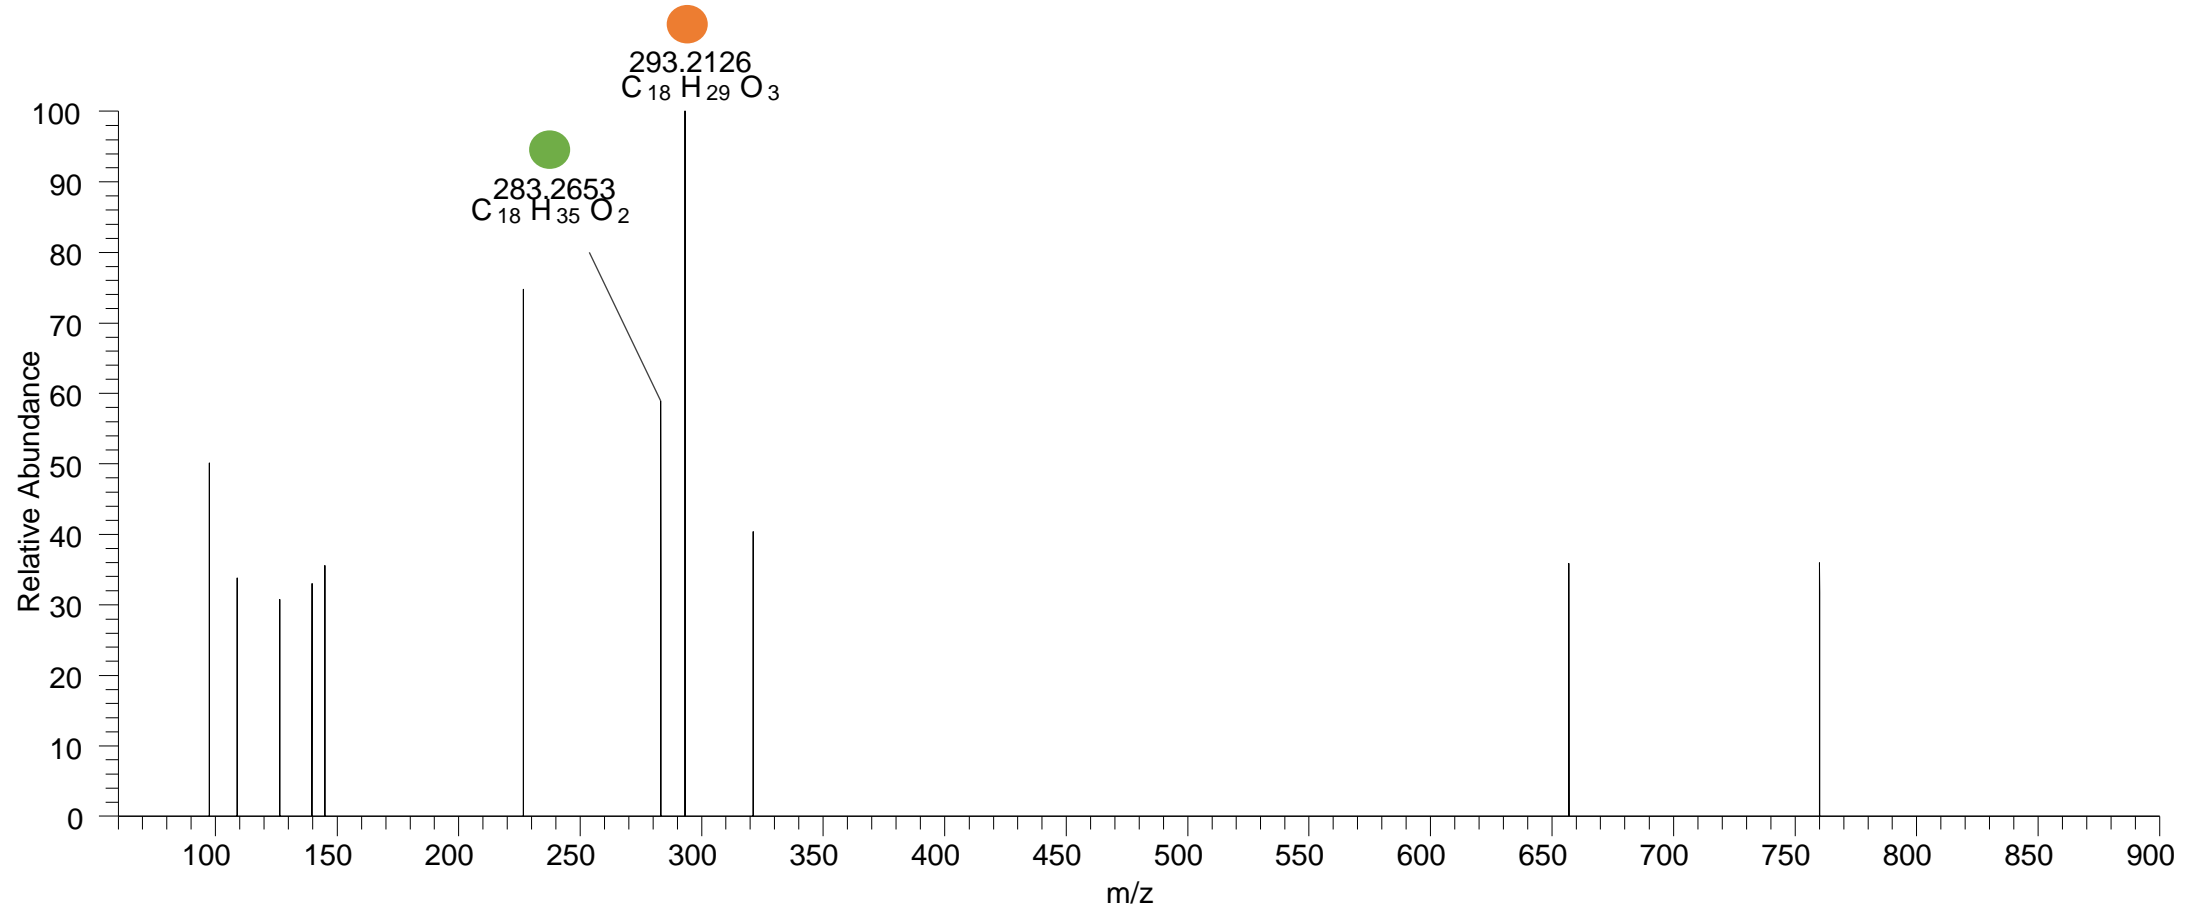

# PC(18:0\_18:2<OOH{13}>)

[oxPC+HCOO]<sup>-</sup> XIC 862.5815 NL: 2.15E4

## RT 15.0

- Fragments containing oxFAs
- Fragments related to water loss
- Fragments not containing oxFAs
- Fragments containing methylated oxFAs
- Fragments related to CO<sub>2</sub> loss
- Position-specific fragments

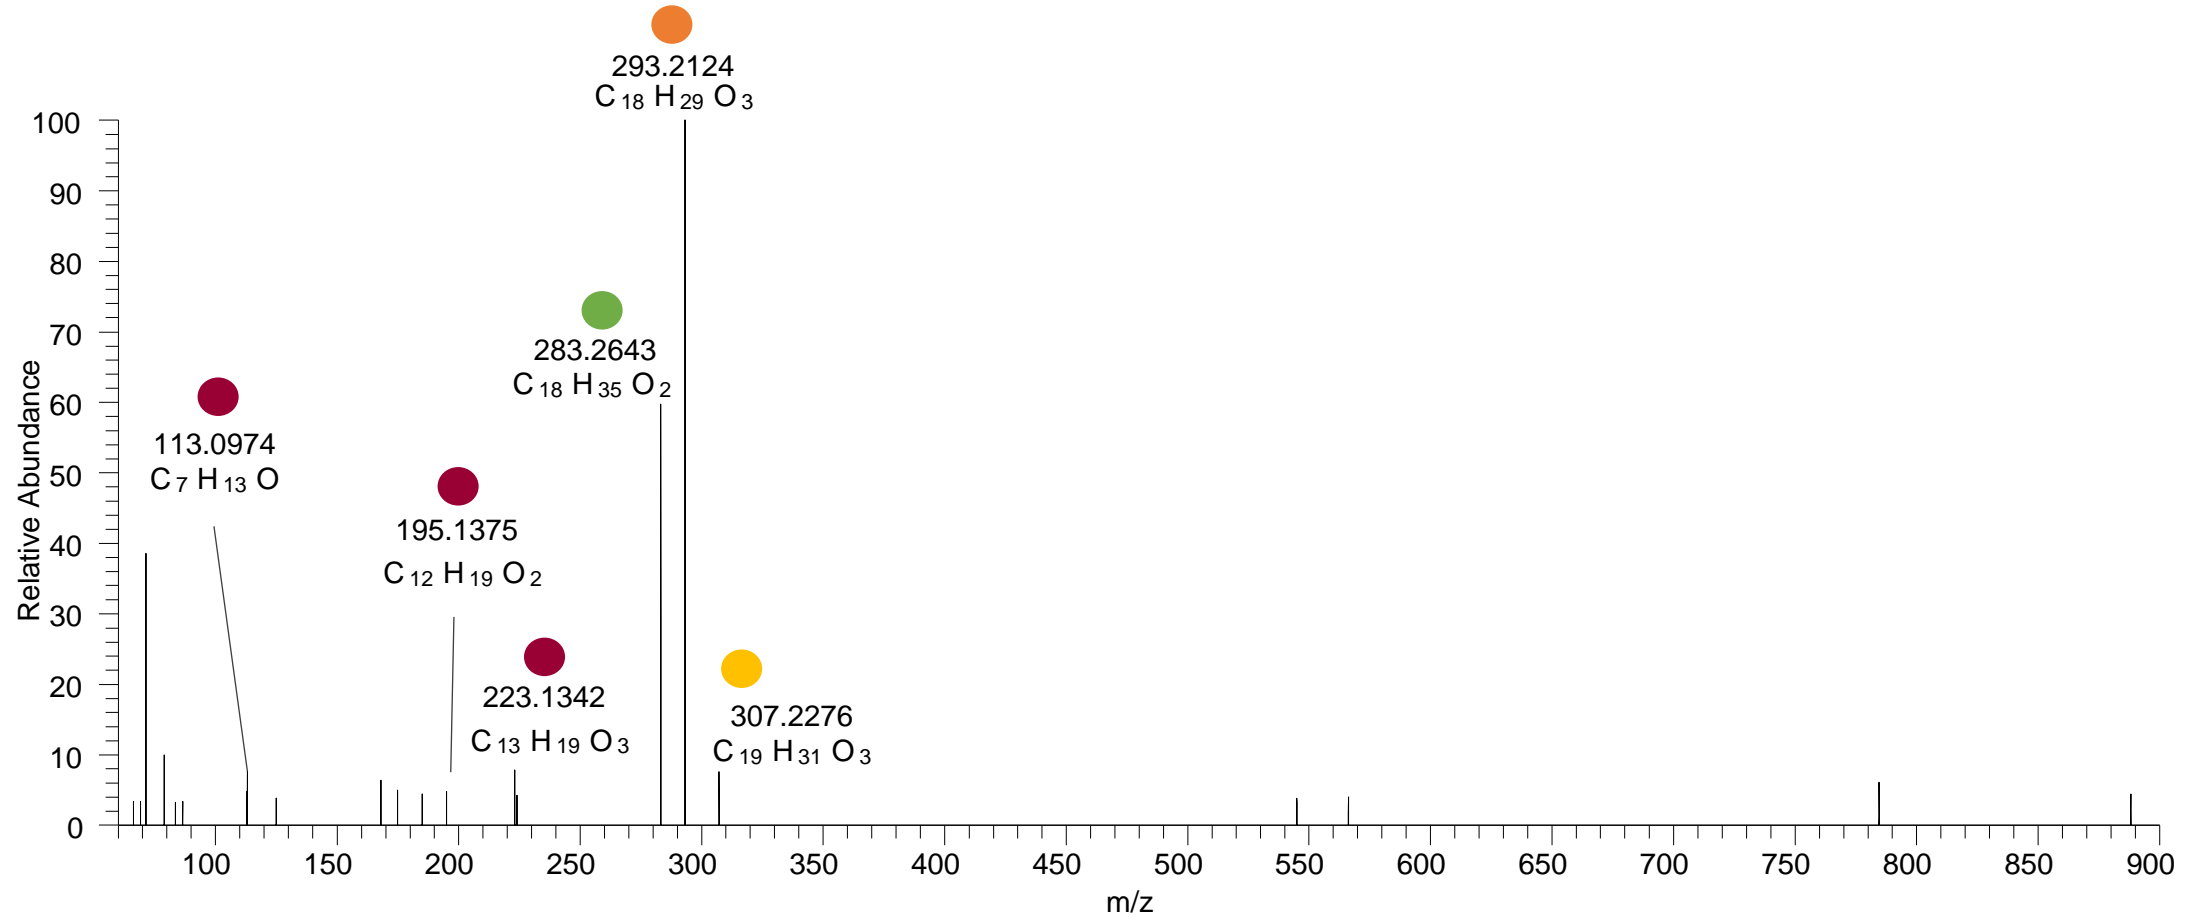

# PC(18:0\_18:2<OOH{9}>)

[oxPC+HCOO]<sup>-</sup> XIC 862.5815 NL: 2.30E4

## RT 15.1

- Fragments containing oxFAs
- Fragments related to water loss
- Fragments not containing oxFAs
- Fragments containing methylated oxFAs
- Fragments related to CO<sub>2</sub> loss
- Position-specific fragments

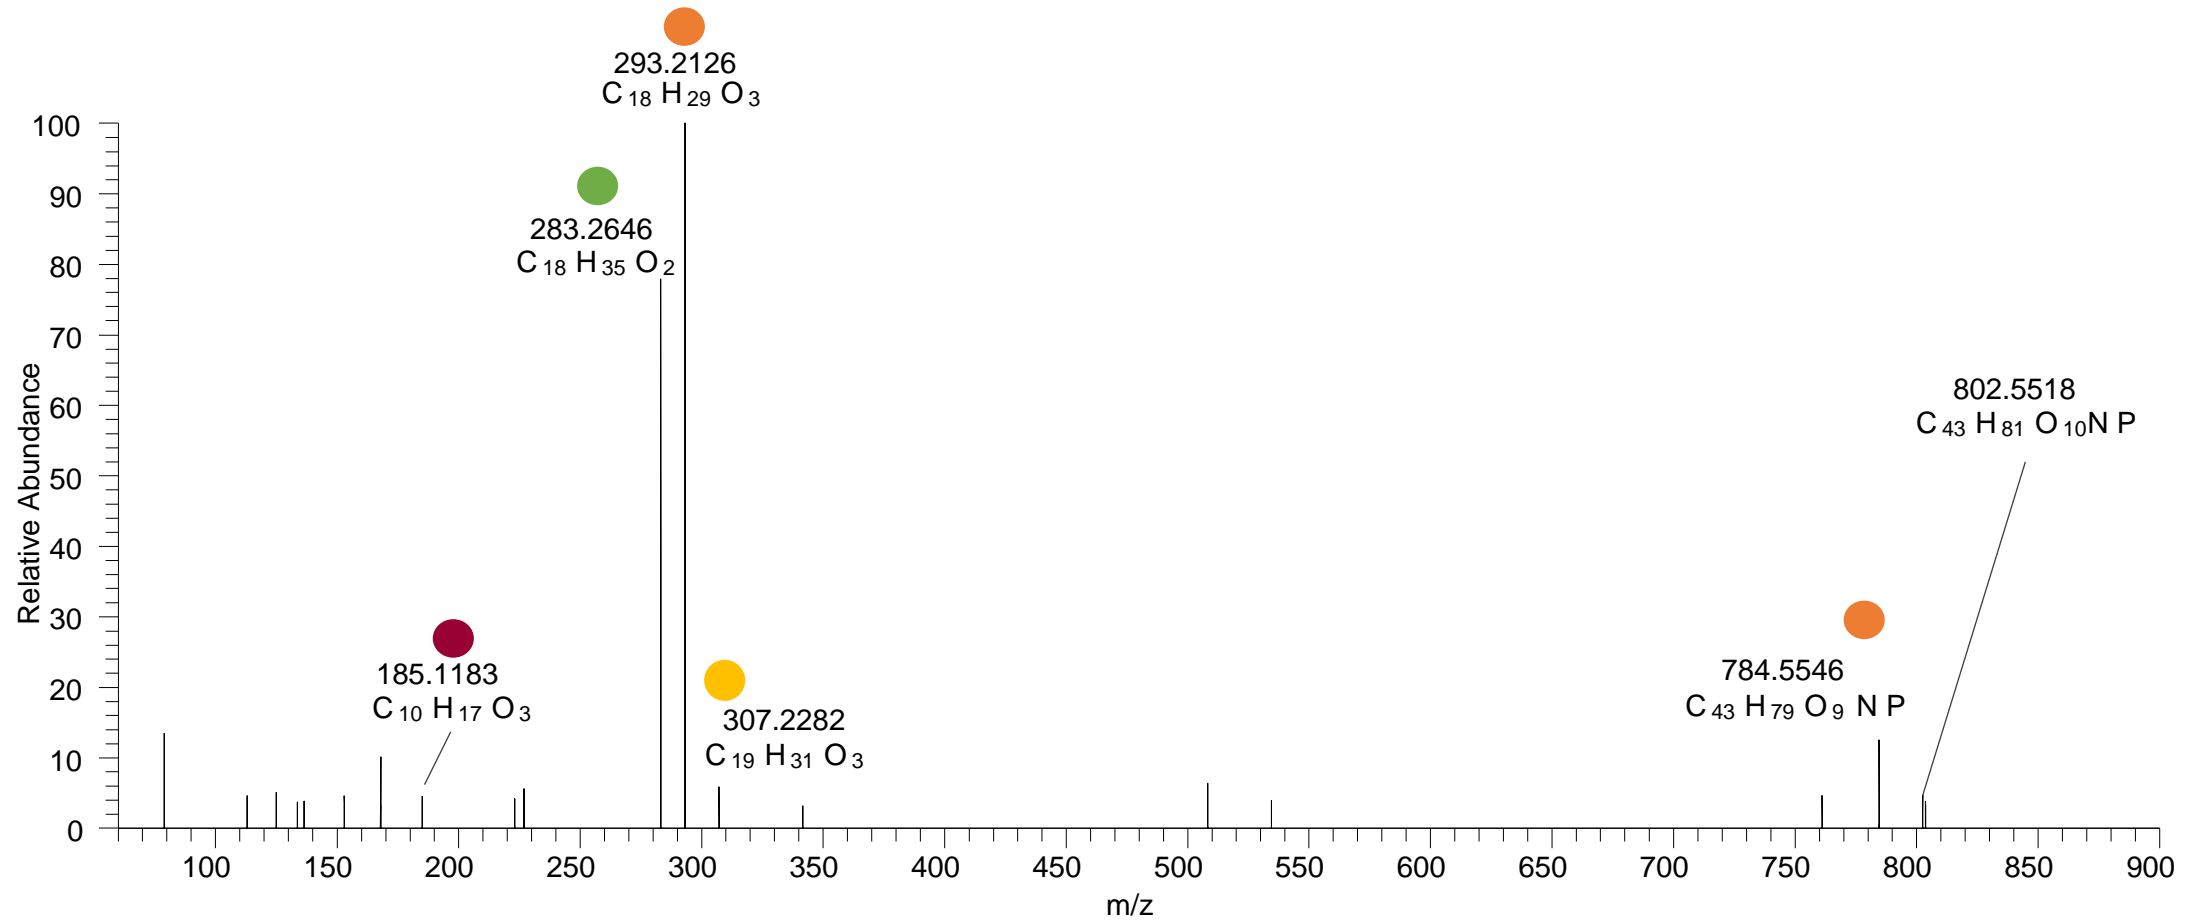

# PC(18:0\_18:2<OOH>)

[oxPC+HCOO]<sup>-</sup> XIC 862.5815 NL: 4.35E3

## RT 15.5

- Fragments containing oxFAs
- Fragments related to water loss
- Fragments not containing oxFAs
- Fragments containing methylated oxFAs
- Fragments related to CO<sub>2</sub> loss
- Position-specific fragments

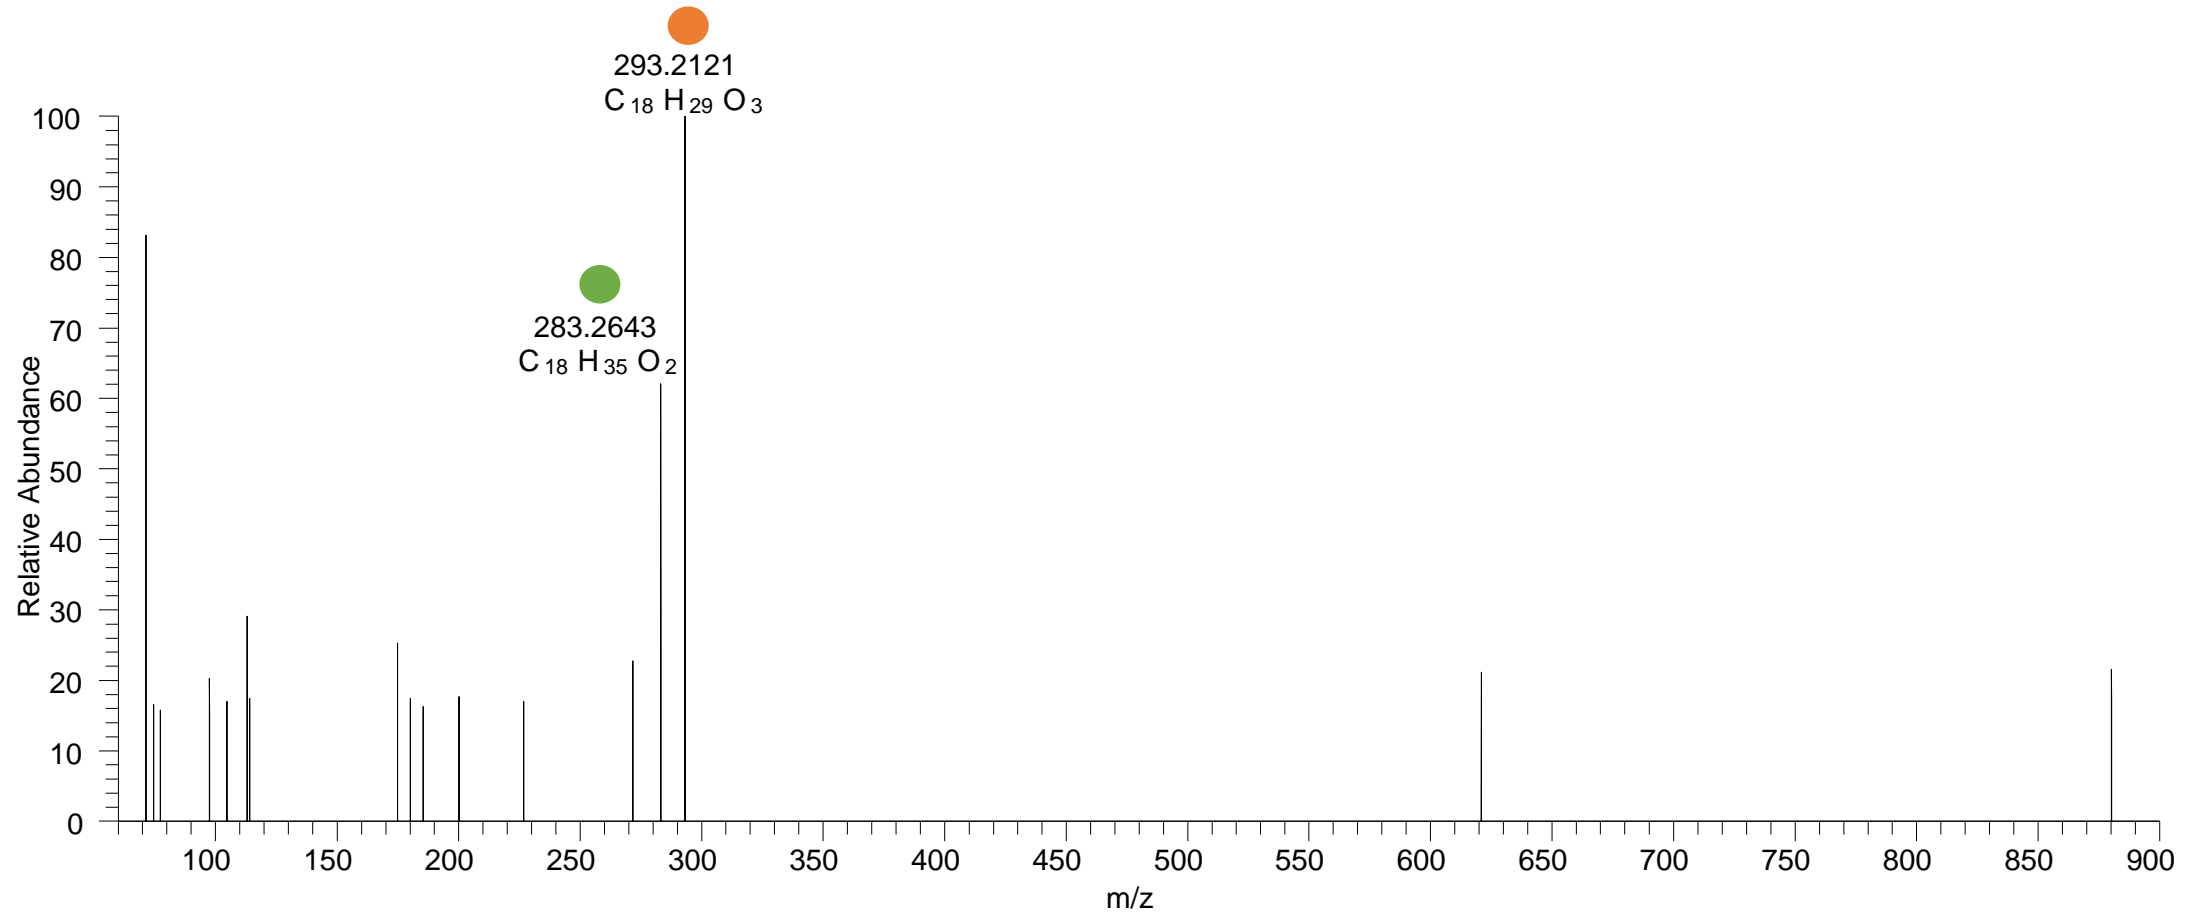

# PC(16:0\_22:6<O>)

[oxPC+HCOO]<sup>-</sup> XIC 866.5553 NL: 5.94E3

## RT 13.1

- Fragments containing oxFAs
- Fragments related to water loss
- Fragments not containing oxFAs
- Fragments containing methylated oxFAs
- Fragments related to CO<sub>2</sub> loss
- Position-specific fragments

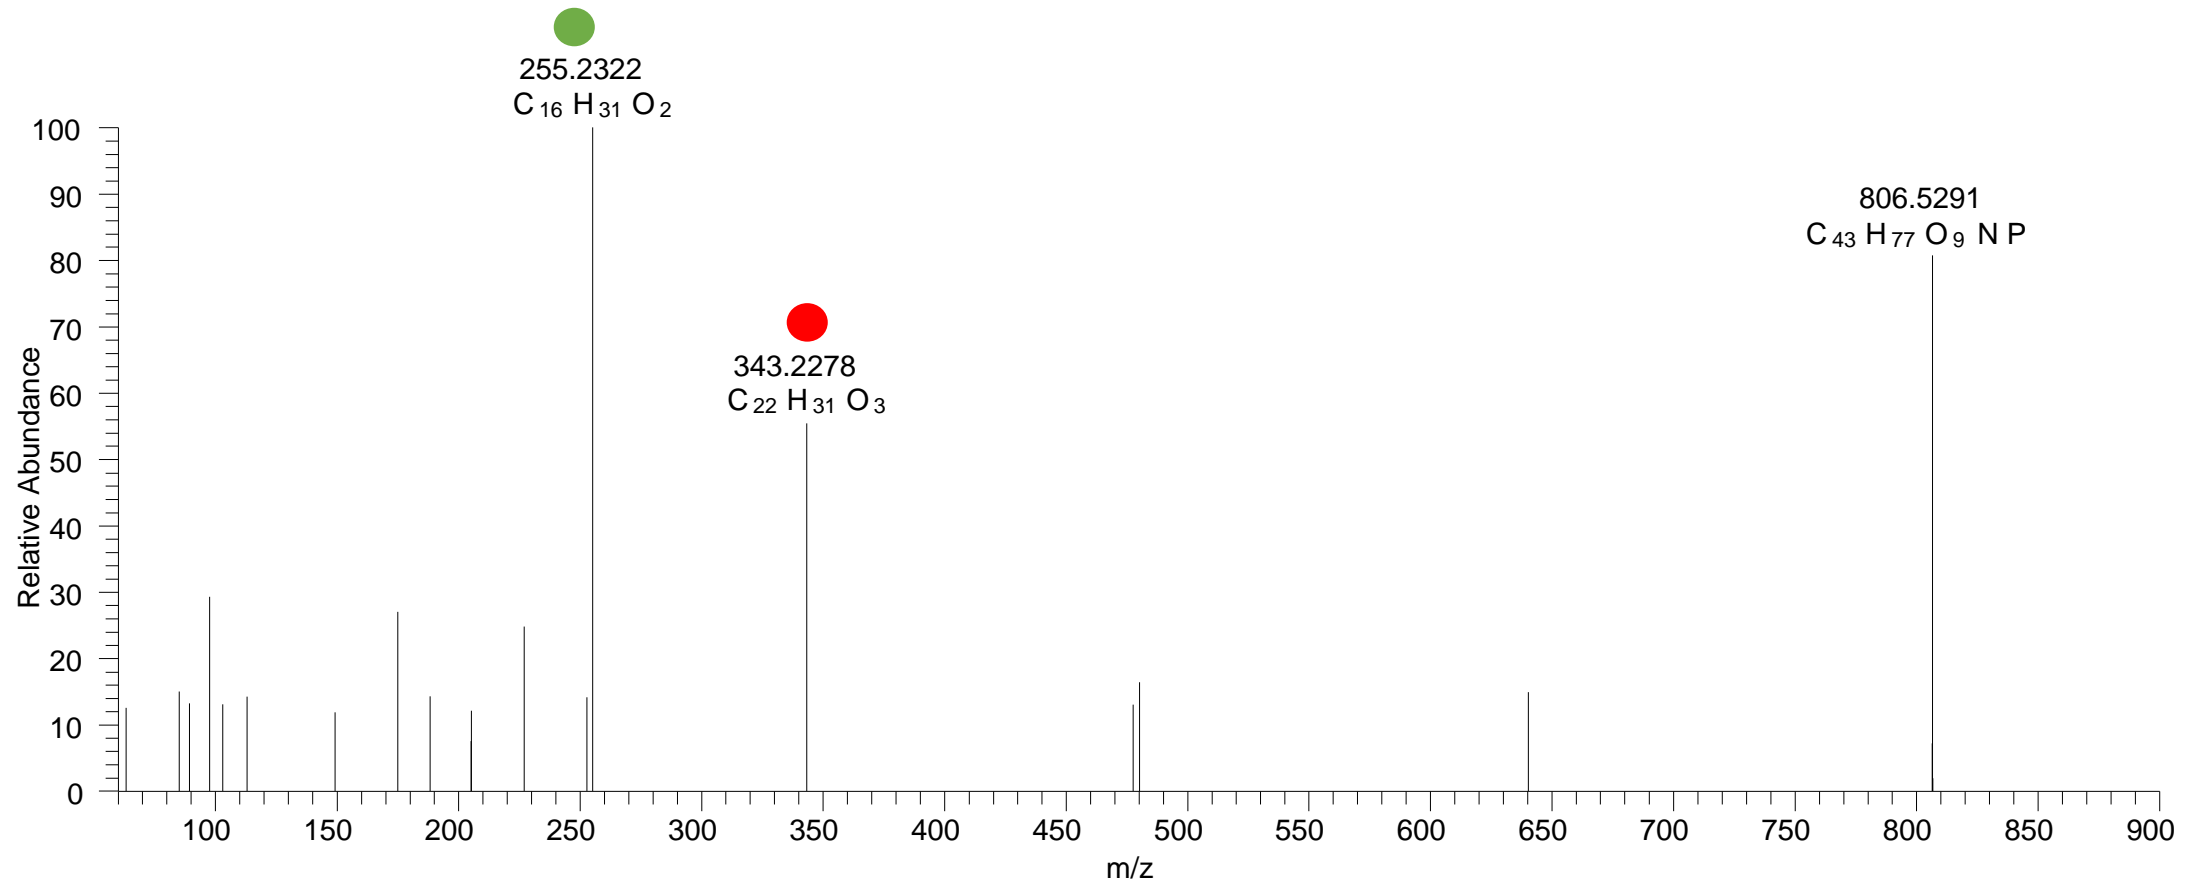



# PC(16:0\_22:6<OH{16}>)

[oxPC+HCOO]<sup>-</sup> XIC 866.5553 NL: 1.09E4

## RT 13.4

- Fragments containing oxFAs
- Fragments related to water loss
- Fragments not containing oxFAs
- Fragments containing methylated oxFAs
- Fragments related to CO<sub>2</sub> loss
- Position-specific fragments

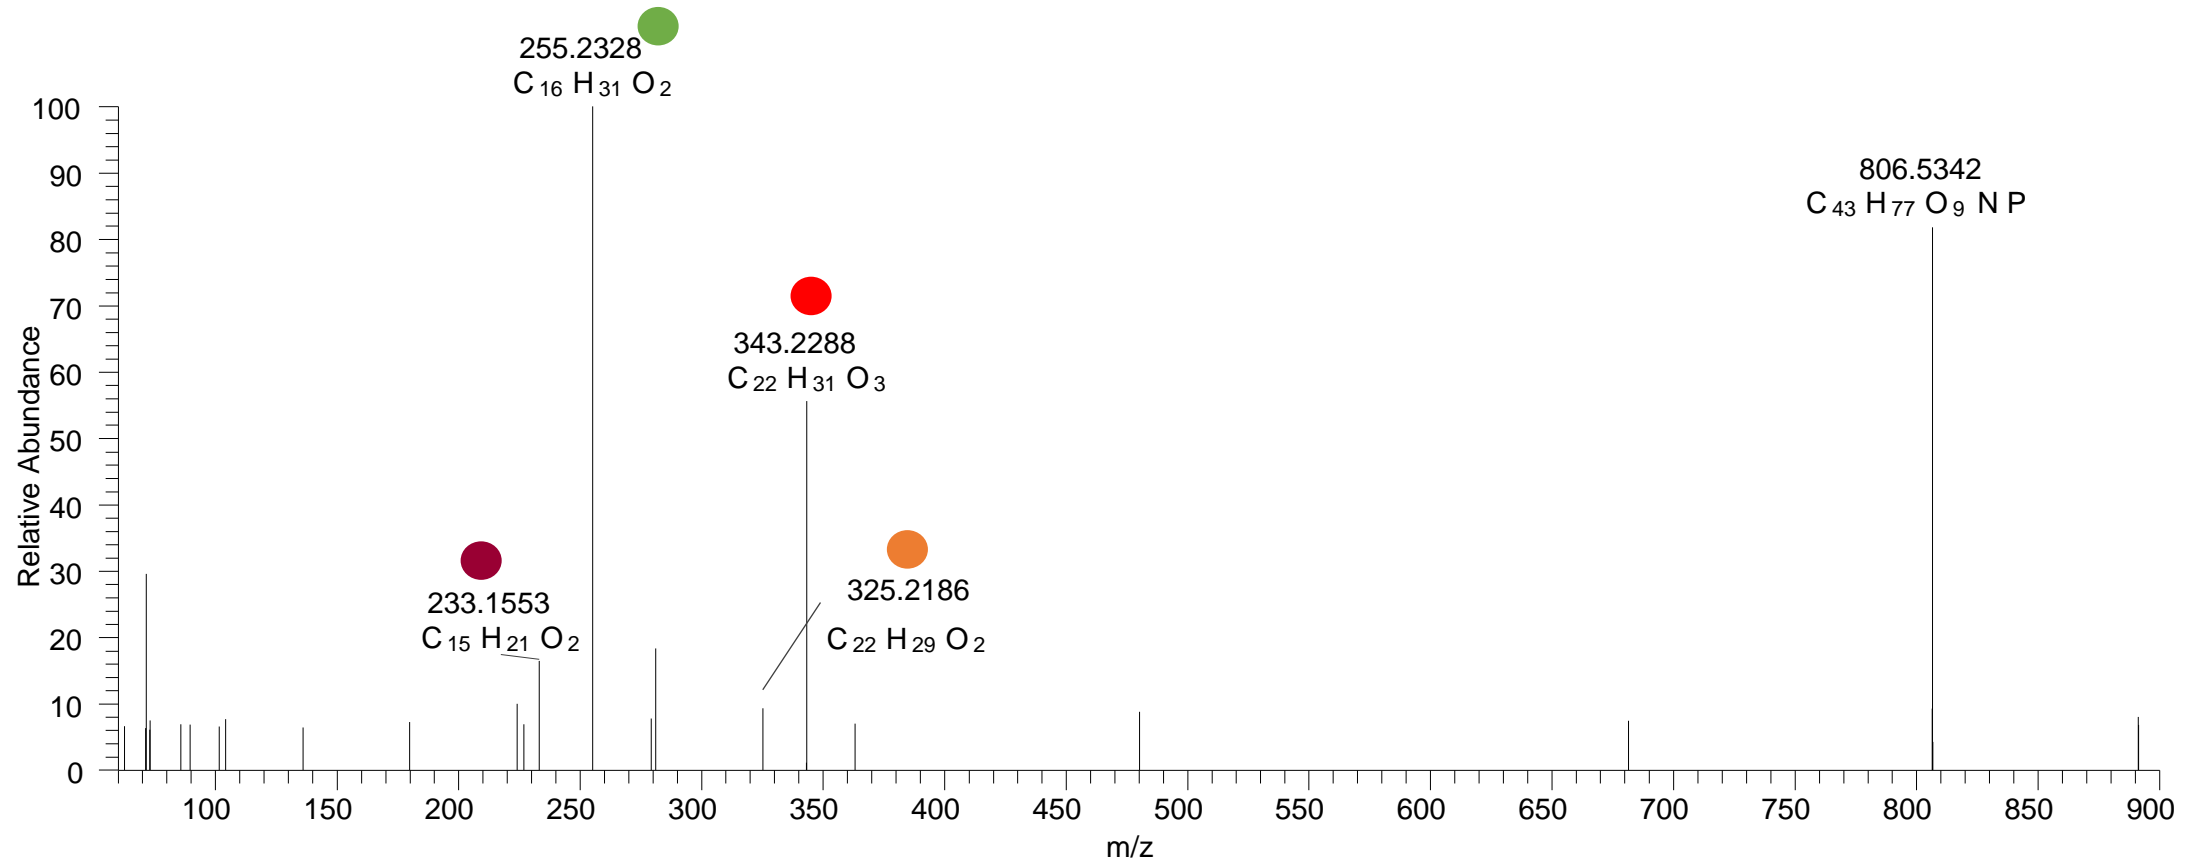

# PC(16:0\_22:6<O>)

[oxPC+HCOO]<sup>-</sup> XIC 866.5553 NL: 1.00E4

## RT 14.4

- Fragments containing oxFAs
- Fragments related to water loss
- Fragments not containing oxFAs
- Fragments containing methylated oxFAs
- Fragments related to CO<sub>2</sub> loss
- Position-specific fragments

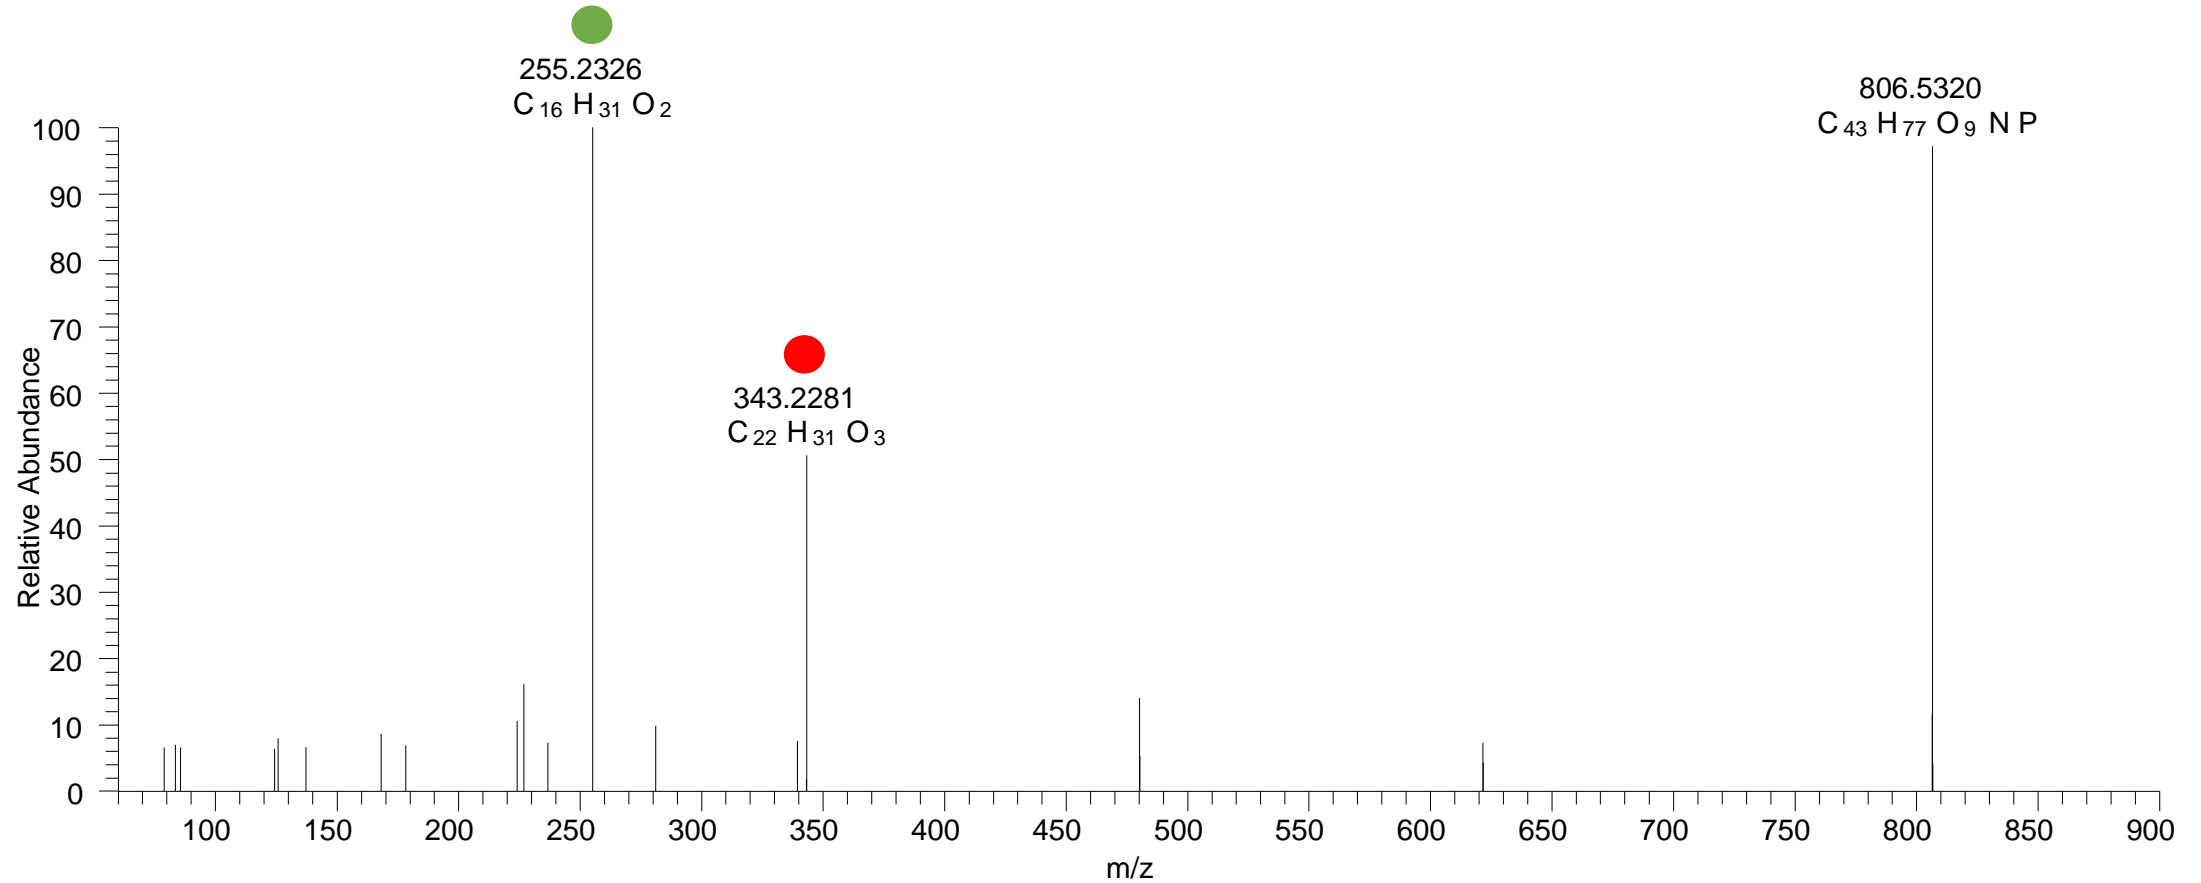

PC(16:0\_22:5<OH>)

[oxPC+HCOO]<sup>-</sup> XIC 868.5709 NL: 4.11E3

PC(18:1\_20:4<O>)

RT 13.7 -14.6

- Fragments containing oxFAs
- Fragments related to water loss
- Fragments not containing oxFAs
- Fragments containing methylated oxFAs
- Fragments related to CO<sub>2</sub> loss
- Position-specific fragments

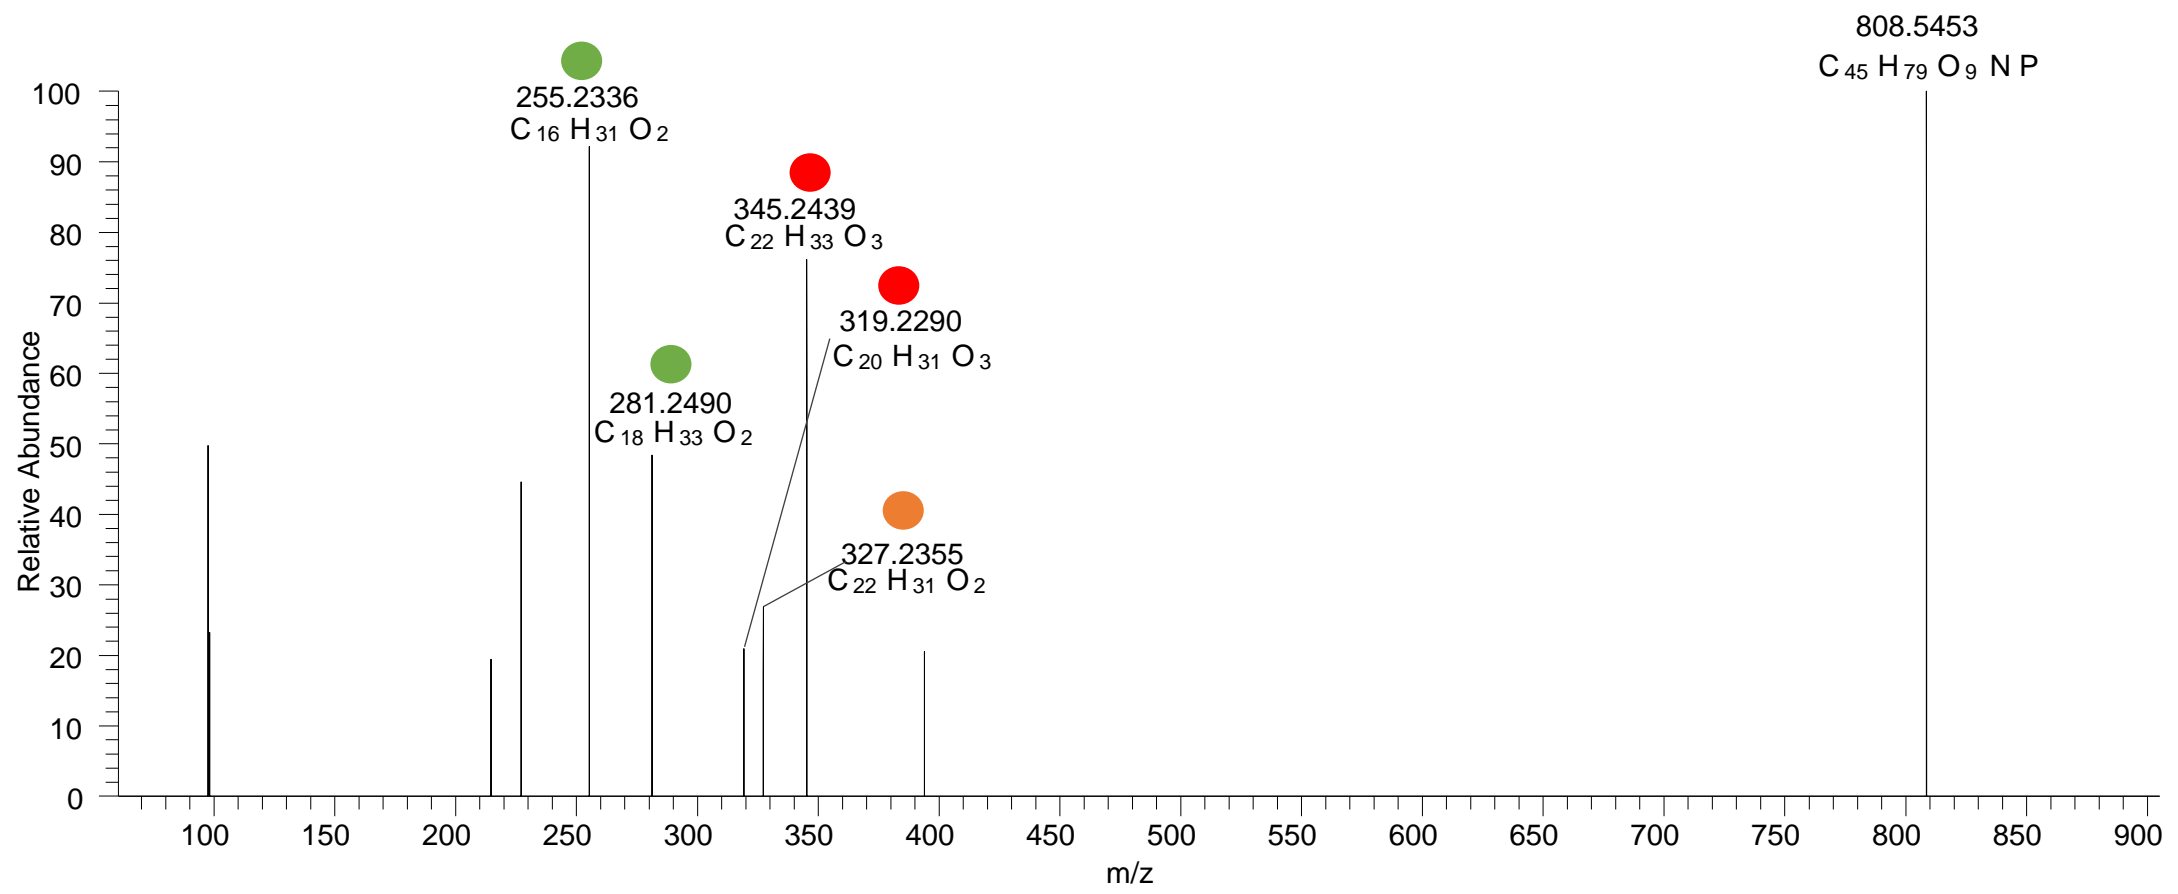

# PC(18:1\_20:4<O>)

[oxPC+HCOO]<sup>-</sup> XIC 868.5709 NL: 4.06E3

## RT 14.9

- Fragments containing oxFAs
- Fragments related to water loss
- Fragments not containing oxFAs
- Fragments containing methylated oxFAs
- Fragments related to CO<sub>2</sub> loss
- Position-specific fragments

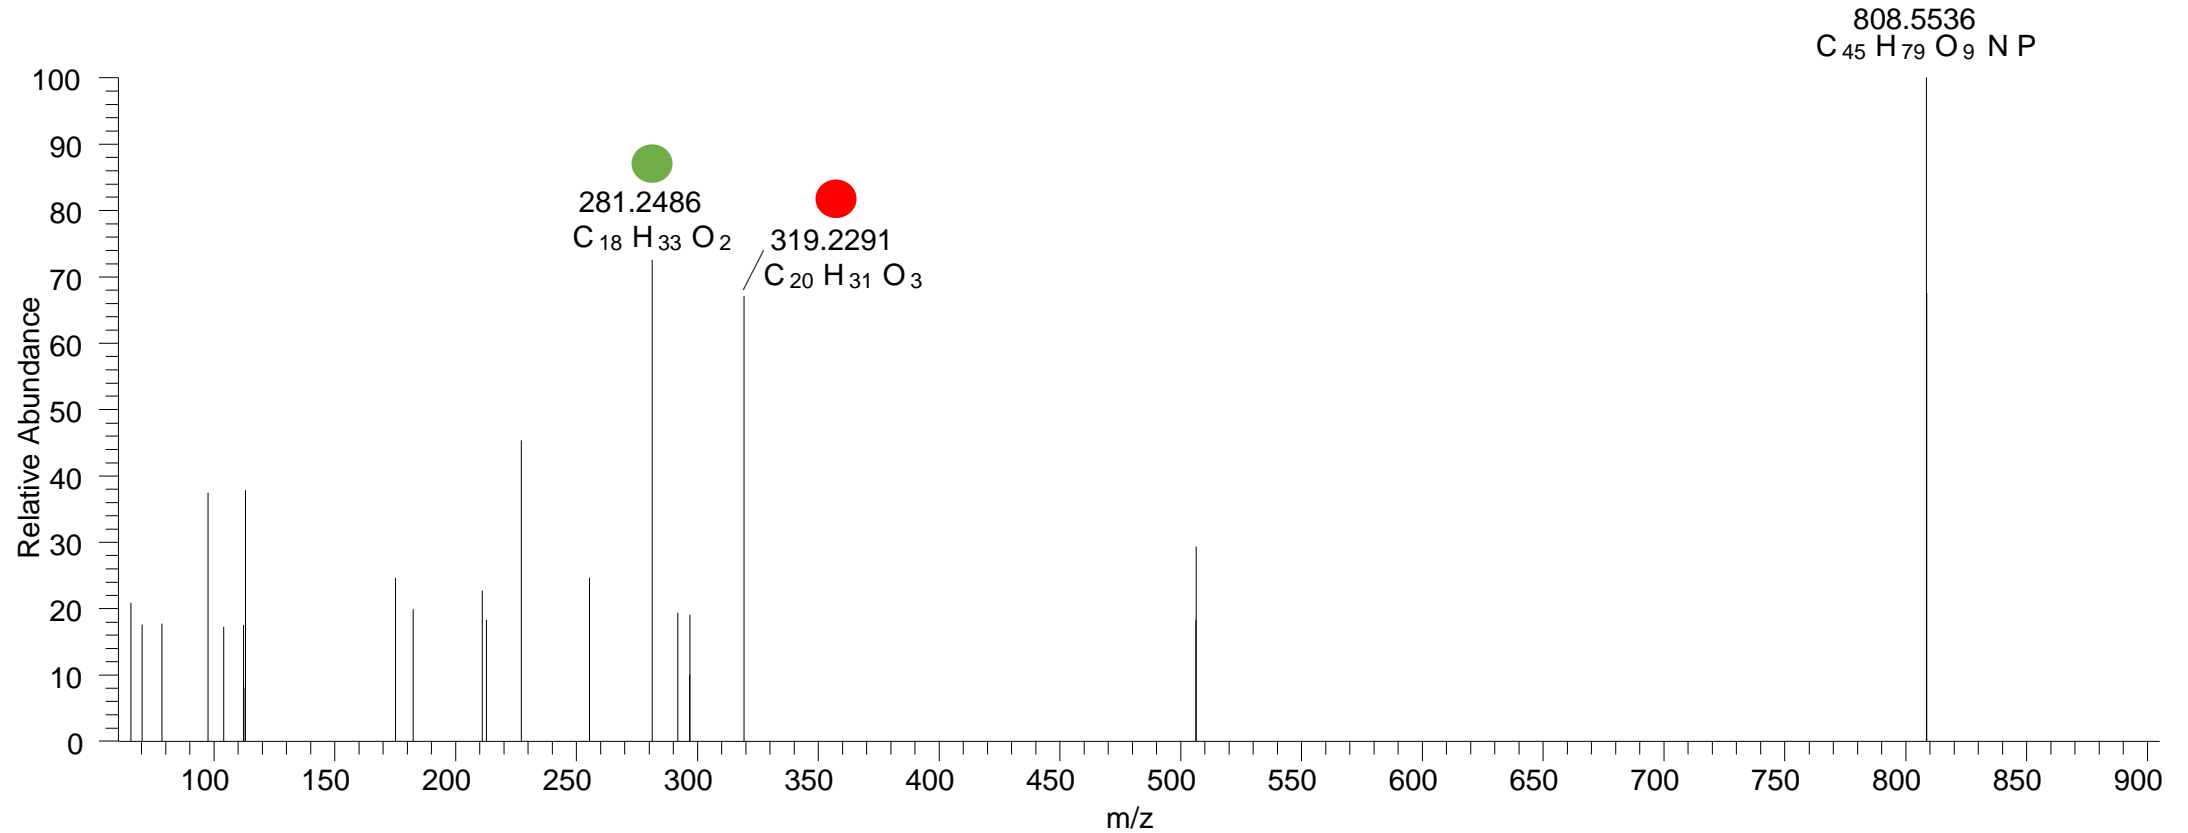

# PC(18:1\_20:3<O>)

[oxPC+HCOO]<sup>-</sup> XIC 870.5866 NL: 3.87E3

## RT 14.5

- Fragments containing oxFAs
- Fragments related to water loss
- Fragments not containing oxFAs
- Fragments containing methylated oxFAs
- Fragments related to CO<sub>2</sub> loss
- Position-specific fragments

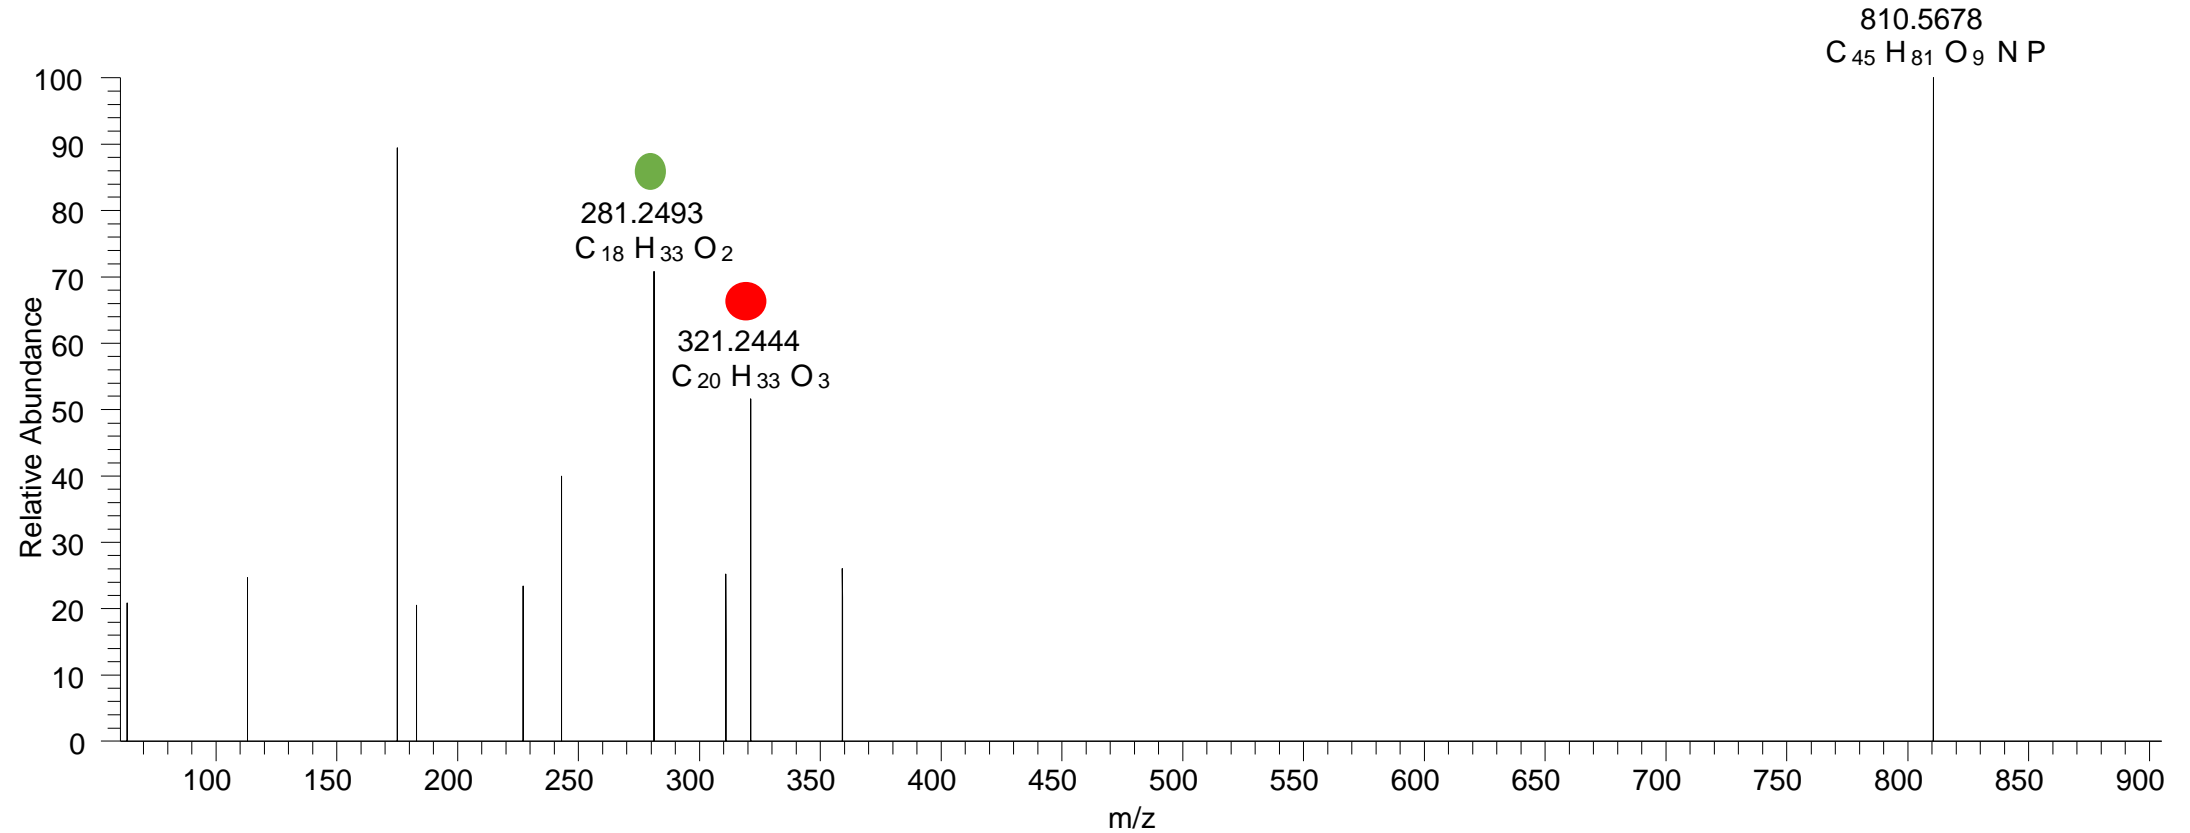

# PC(18:0\_20:4<OH{15}>)

[oxPC+HCOO]- XIC 870.5866 NL: 8.43E3

## RT 15.3

- Fragments containing oxFAs
- Fragments related to water loss
- Fragments not containing oxFAs
- Fragments containing methylated oxFAs
- Fragments related to CO<sub>2</sub> loss
- Position-specific fragments

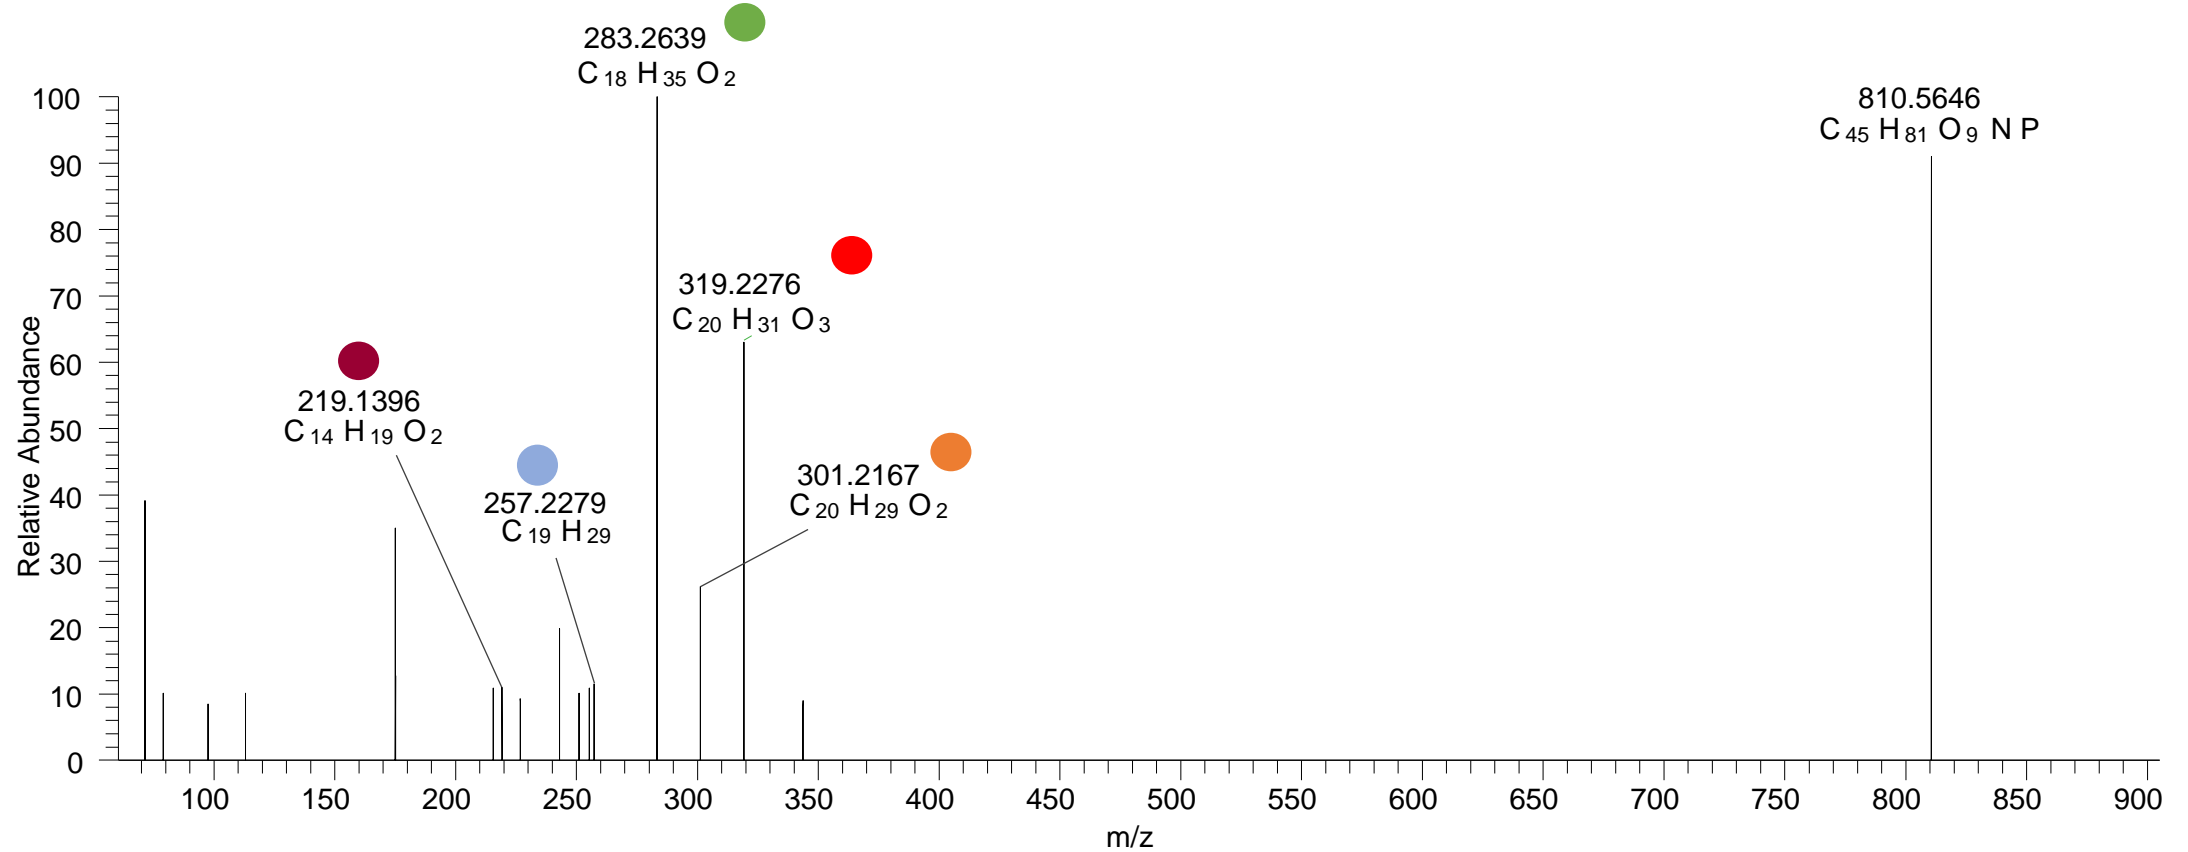

# PC(18:0\_20:4<OH{11}>)

[oxPC+HCOO]<sup>-</sup> XIC 870.5866 NL: 1.46E4

## RT 15.7

- Fragments containing oxFAs
- Fragments related to water loss
- Fragments not containing oxFAs
- Fragments containing methylated oxFAs
- Fragments related to CO<sub>2</sub> loss
- Position-specific fragments

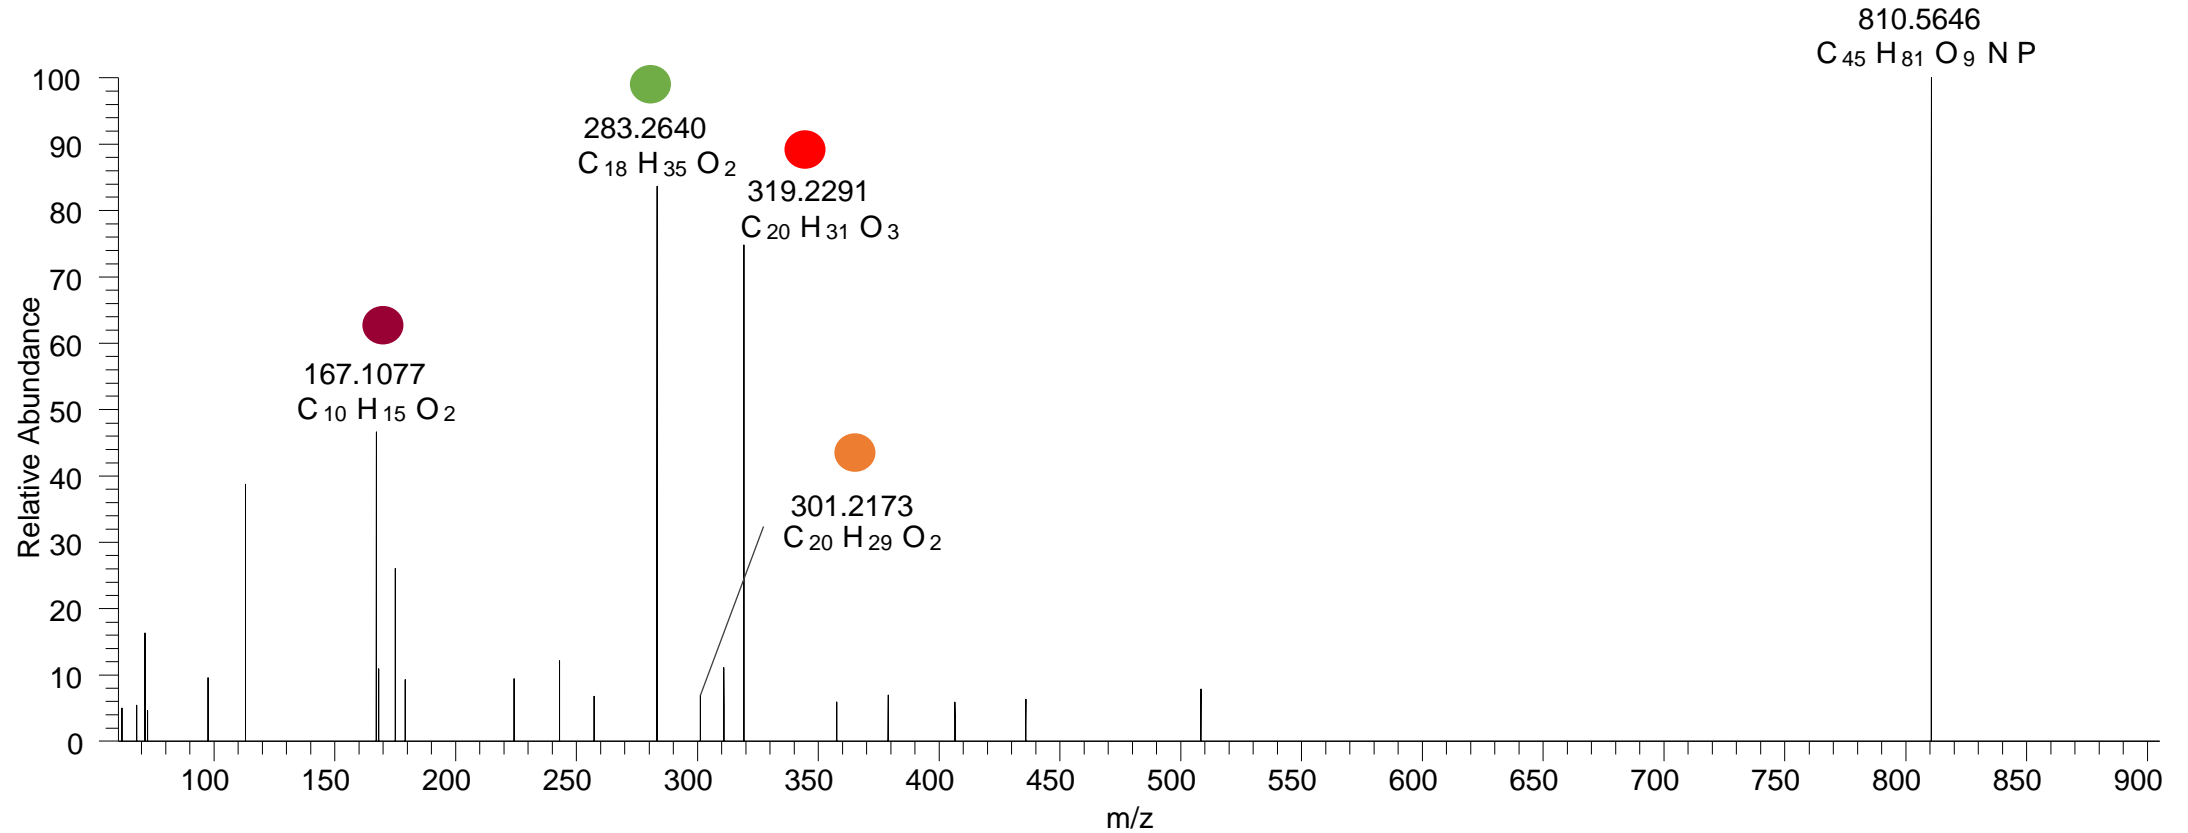

PC(18:0\_20:4<OH{12}>)  
PC(18:0\_20:4<OH{9}>)  
PC(18:0\_20:4<OH{8}>)  
RT 16.2

[oxPC+HCOO]<sup>-</sup> XIC 870.5866 NL: 1.81E4

- Fragments containing oxFAs
- Fragments related to water loss
- Fragments not containing oxFAs
- Fragments containing methylated oxFAs
- Fragments related to CO<sub>2</sub> loss
- Position-specific fragments

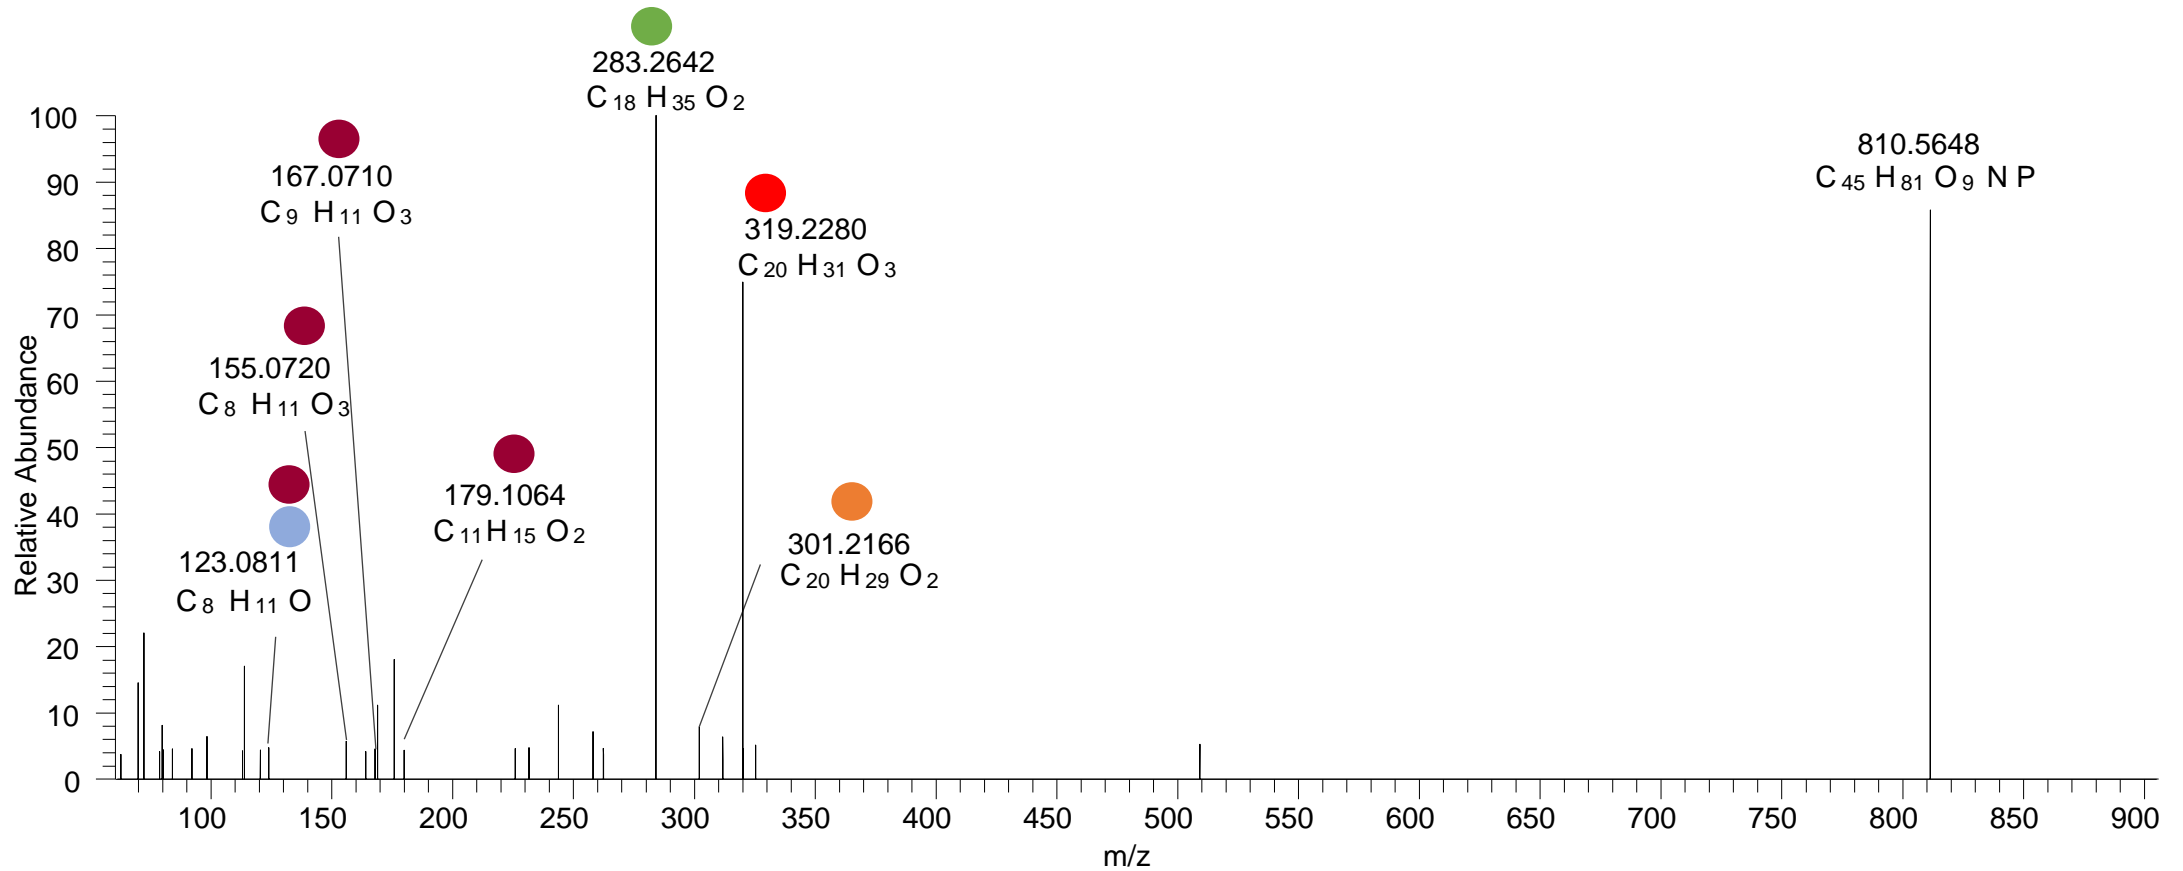



# PC(18:0\_20:4<O>)

[oxPC+HCOO]<sup>-</sup> XIC 870.5866 NL: 3.02E3

## RT 16.7

- Fragments containing oxFAs
- Fragments related to water loss
- Fragments not containing oxFAs
- Fragments containing methylated oxFAs
- Fragments related to CO<sub>2</sub> loss
- Position-specific fragments

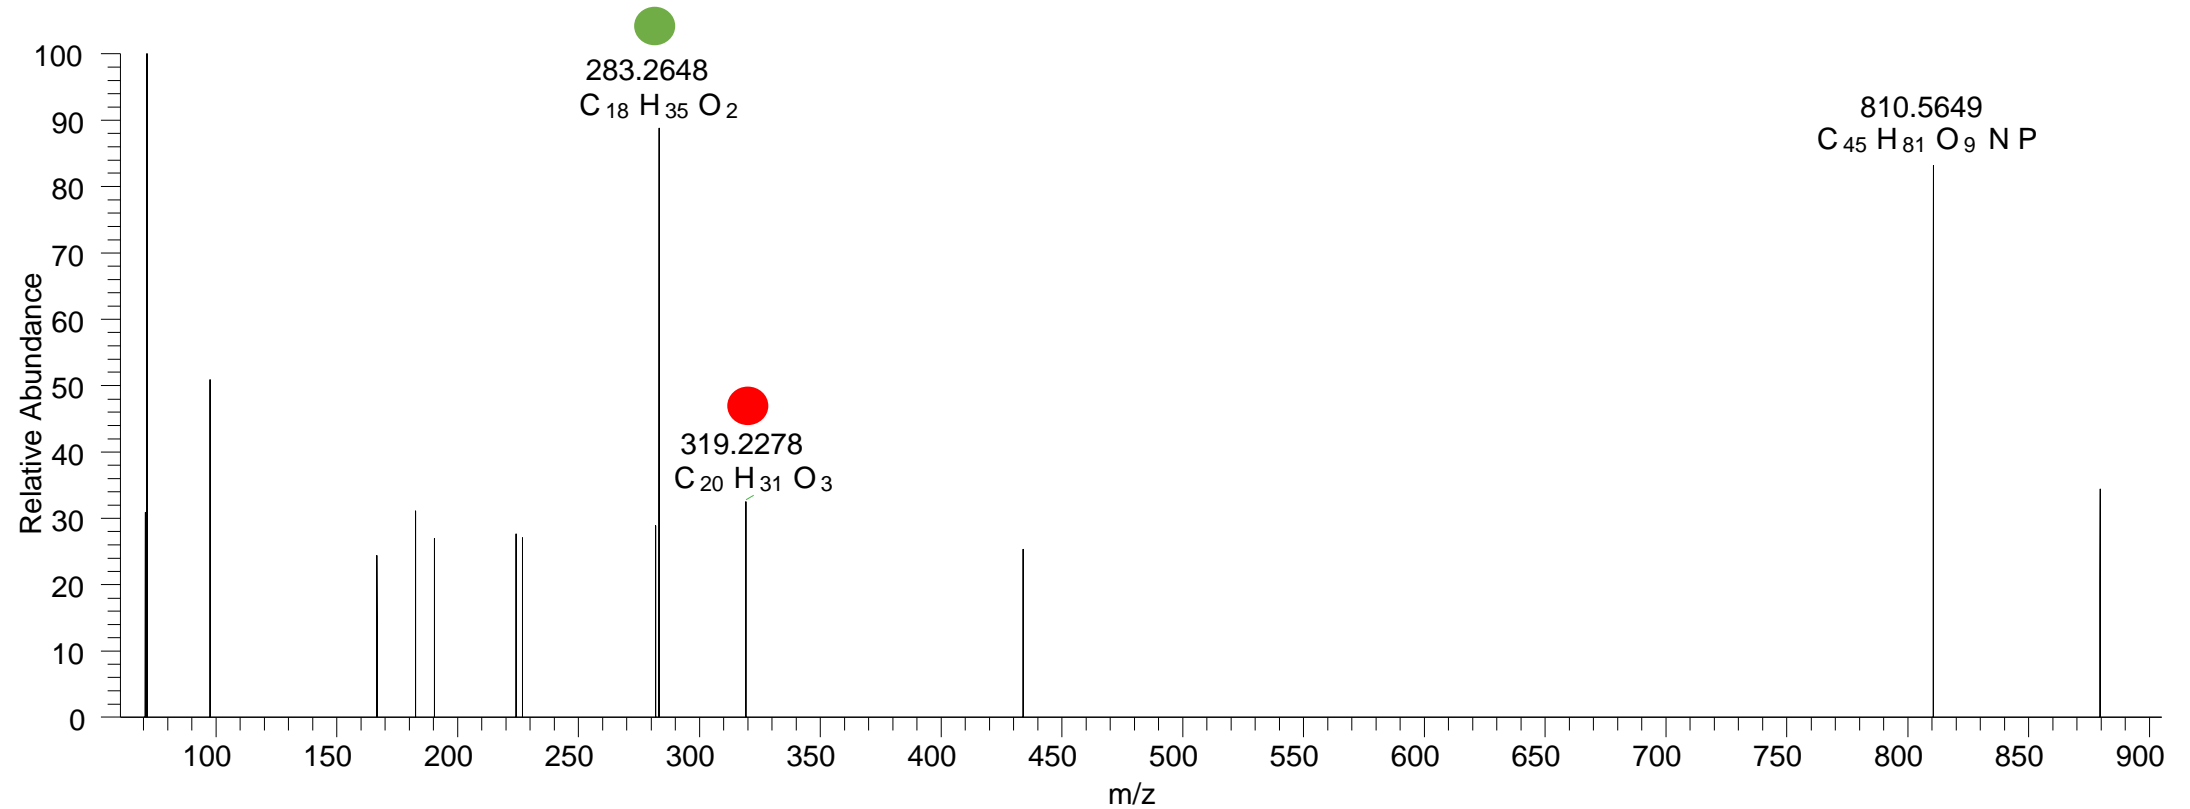

# PC(16:0\_22:6<2O>)

[oxPC+HCOO]<sup>-</sup> XIC 882.5502 NL: 3.04E3

## RT 10.9-13.4

- Fragments containing oxFAs
- Fragments related to water loss
- Fragments not containing oxFAs
- Fragments containing methylated oxFAs
- Fragments related to CO<sub>2</sub> loss
- Position-specific fragments

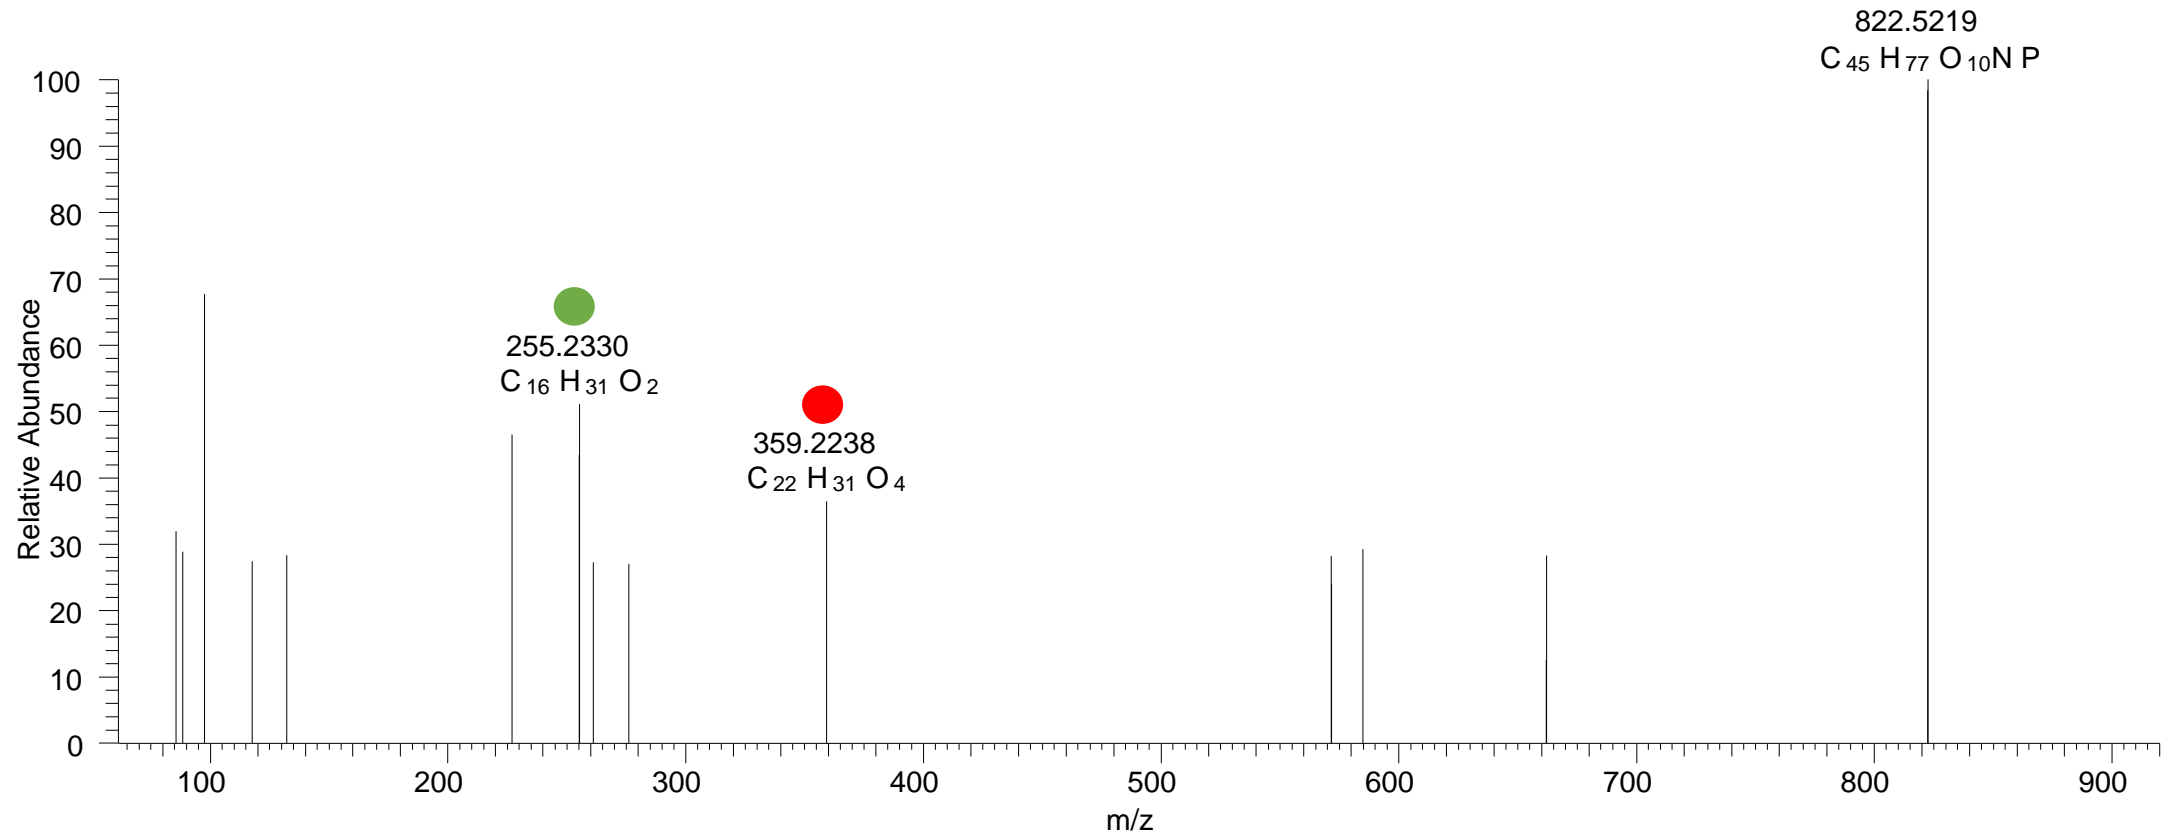

# PC(16:0\_22:5<OOH>)

[oxPC+HCOO]- XIC 884.5658 NL: 1.89E3

## RT 12.4

- Fragments containing oxFAs
- Fragments related to water loss
- Fragments not containing oxFAs
- Fragments containing methylated oxFAs
- Fragments related to CO<sub>2</sub> loss
- Position-specific fragments

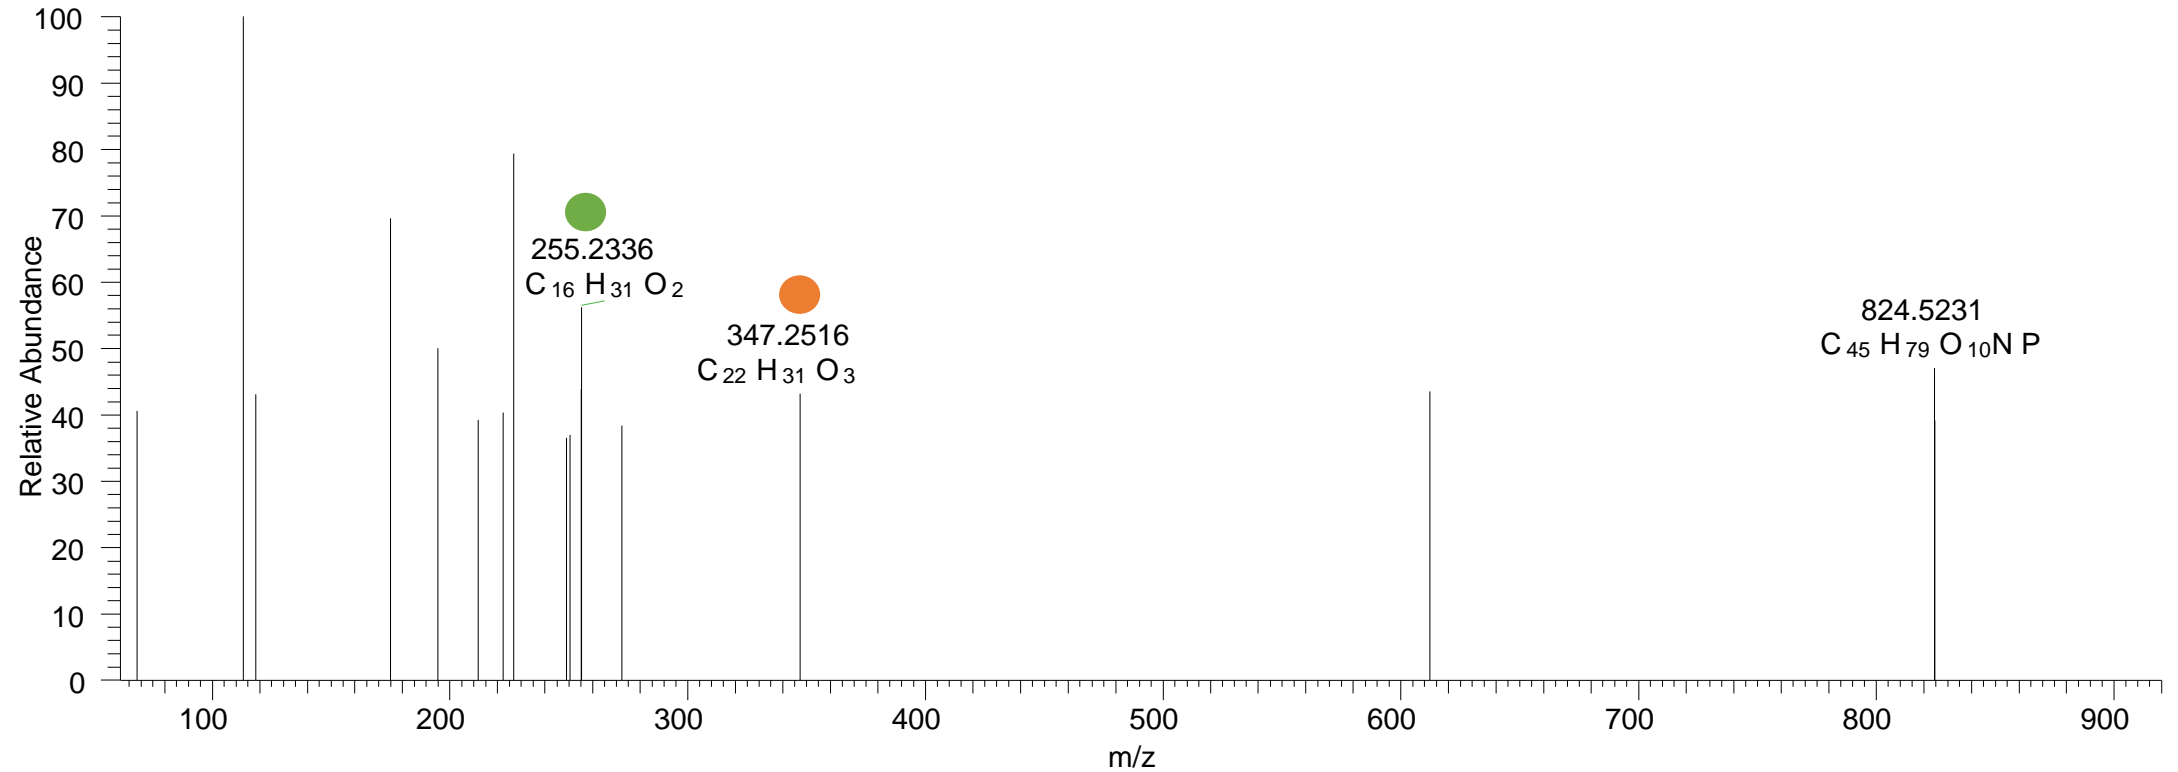

# PC(18:0\_20:4<2O>)

[oxPC+HCOO]<sup>-</sup> XIC 886.5815 NL: 6.57E3

## RT 13.0

- Fragments containing oxFAs
- Fragments related to water loss
- Fragments not containing oxFAs
- Fragments containing methylated oxFAs
- Fragments related to CO<sub>2</sub> loss
- Position-specific fragments

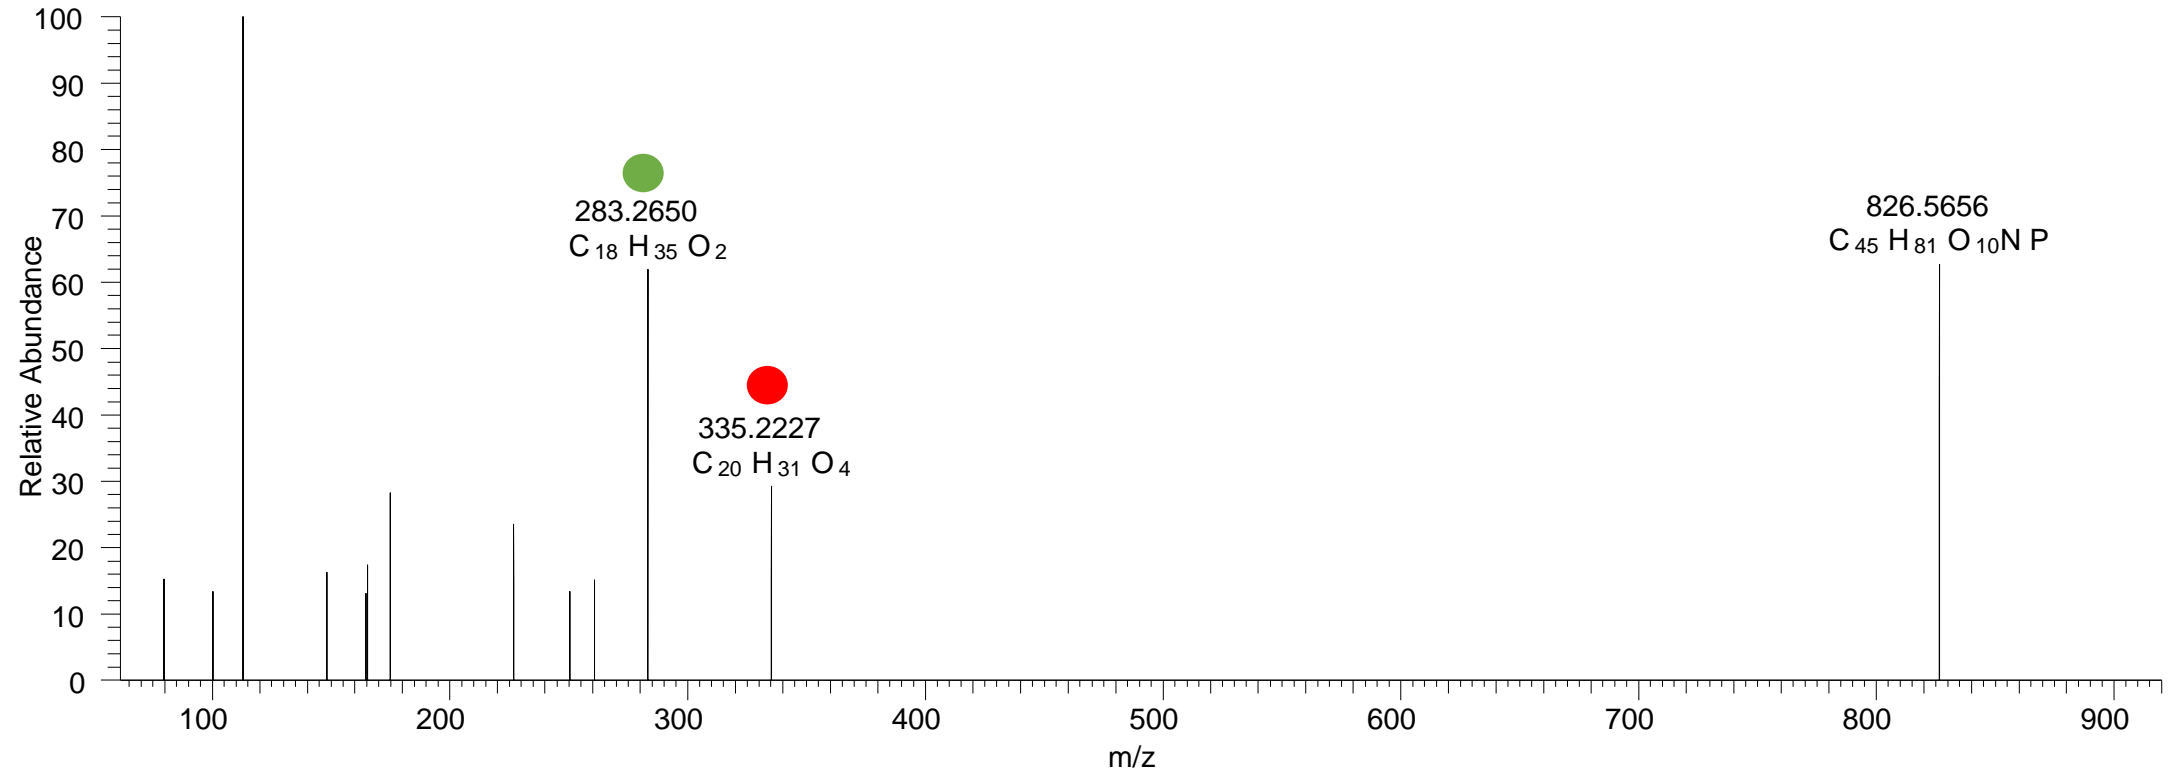

# PC(18:0\_20:4<OOH>)

[oxPC+HCOO]- XIC 886.5815 NL: 4.08E3

## RT 14.4 -15.3

- Fragments containing oxFAs
- Fragments related to water loss
- Fragments not containing oxFAs
- Fragments containing methylated oxFAs
- Fragments related to CO<sub>2</sub> loss
- Position-specific fragments

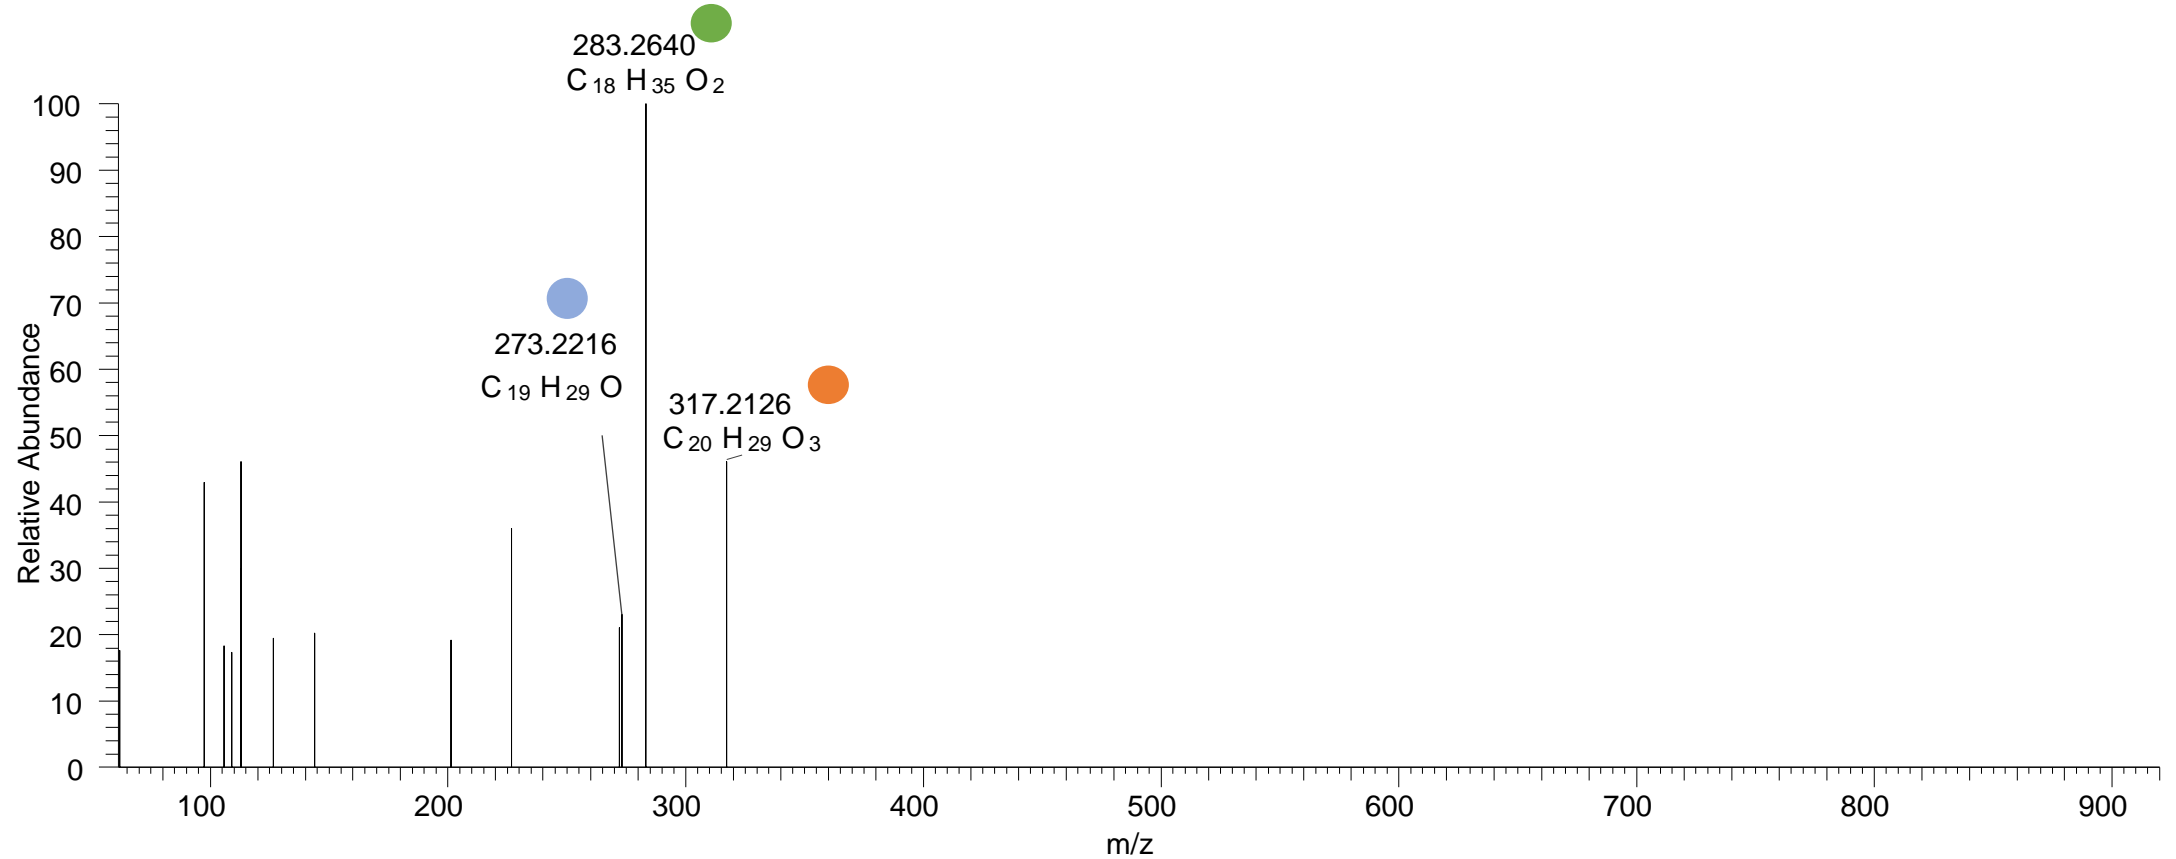

# PC(18:0\_20:4<OOH{7}>)

[oxPC+HCOO]- XIC 886.5815 NL: 7.05E3

## RT 16.0

- Fragments containing oxFAs
- Fragments related to water loss
- Fragments not containing oxFAs
- Fragments containing methylated oxFAs
- Fragments related to CO<sub>2</sub> loss
- Position-specific fragments

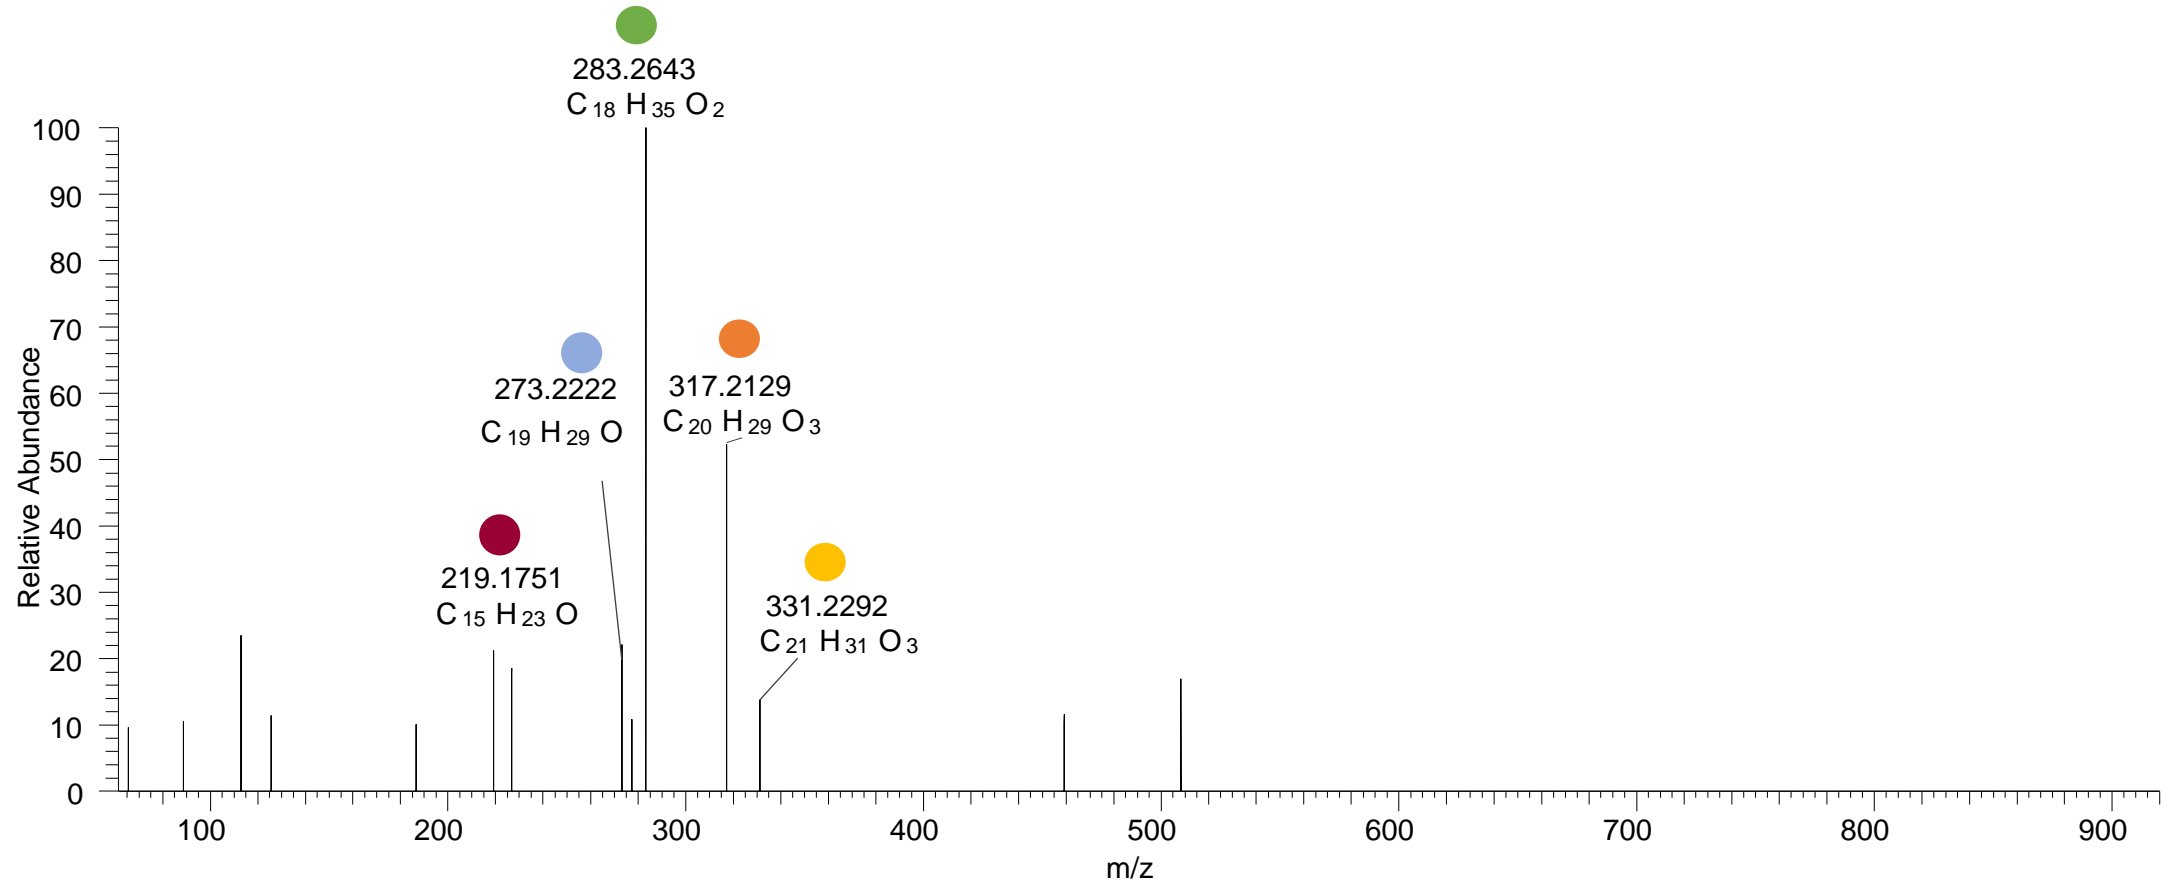

# PC(18:0\_20:4<OOH>)

[oxPC+HCOO]<sup>-</sup> XIC 886.5815 NL: 3.43E3

## RT 16.4

- Fragments containing oxFAs
- Fragments related to water loss
- Fragments not containing oxFAs
- Fragments containing methylated oxFAs
- Fragments related to CO<sub>2</sub> loss
- Position-specific fragments

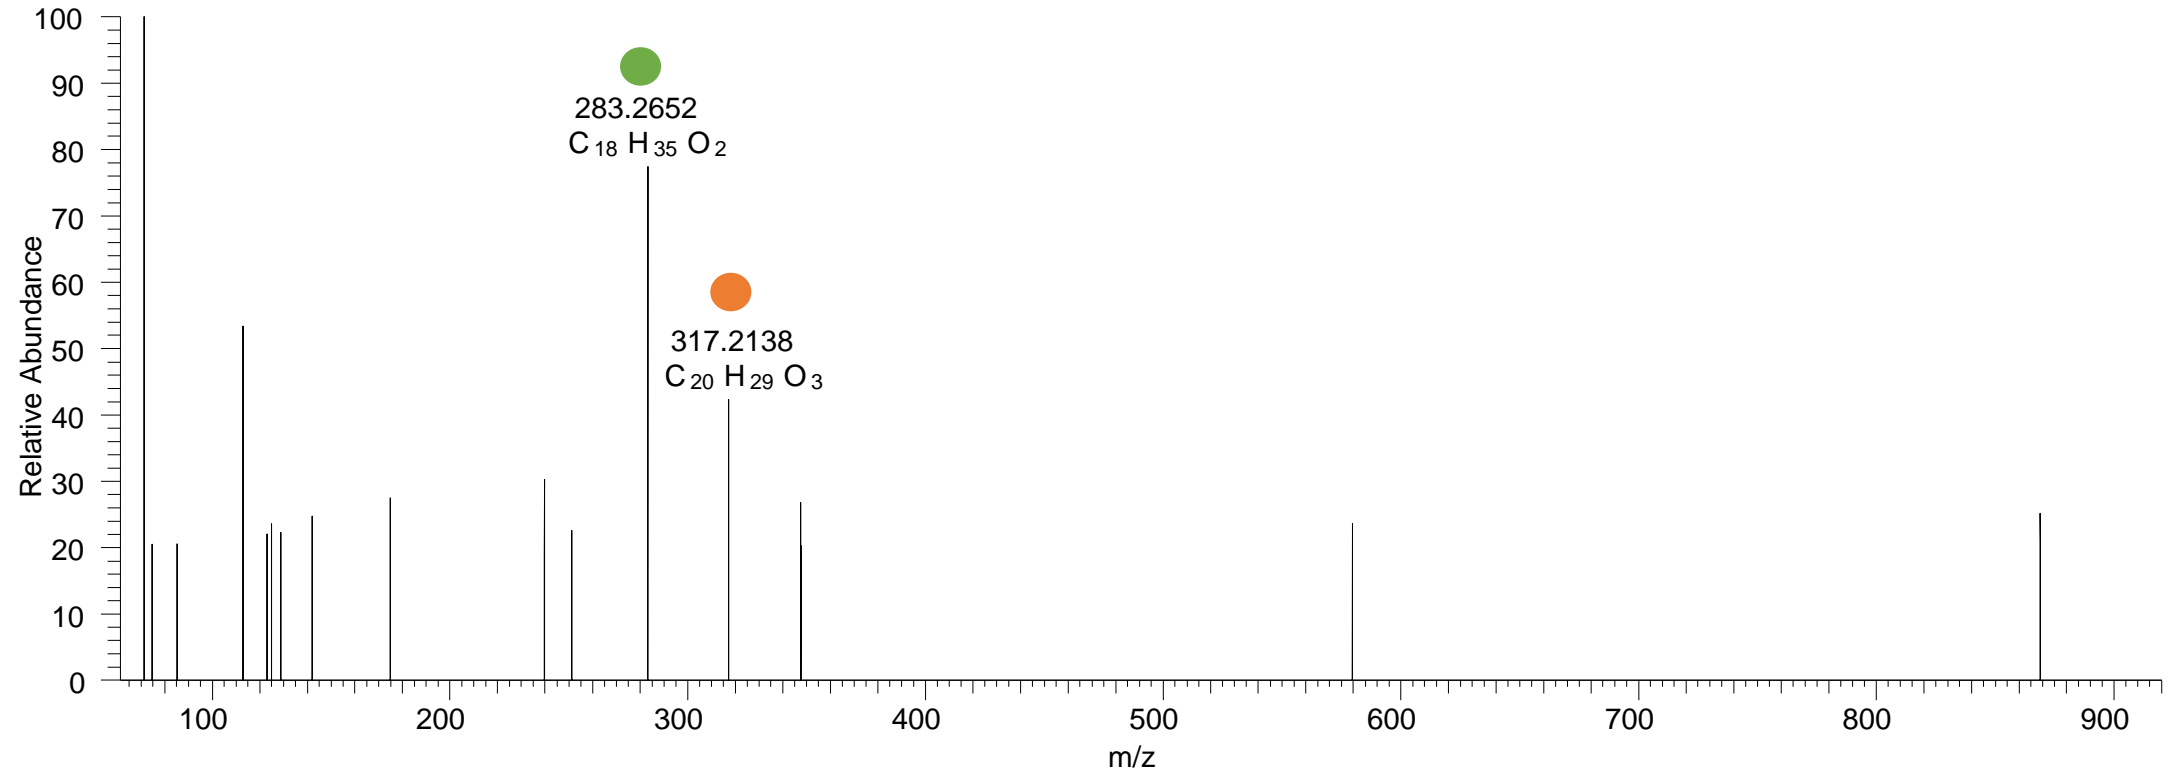

# PC(18:0\_20:3<OOH>)

[oxPC+HCOO]<sup>-</sup> XIC 888.5971 NL: 3.28E3

## RT 15.8

- Fragments containing oxFAs
- Fragments related to water loss
- Fragments not containing oxFAs
- Fragments containing methylated oxFAs
- Fragments related to CO<sub>2</sub> loss
- Position-specific fragments

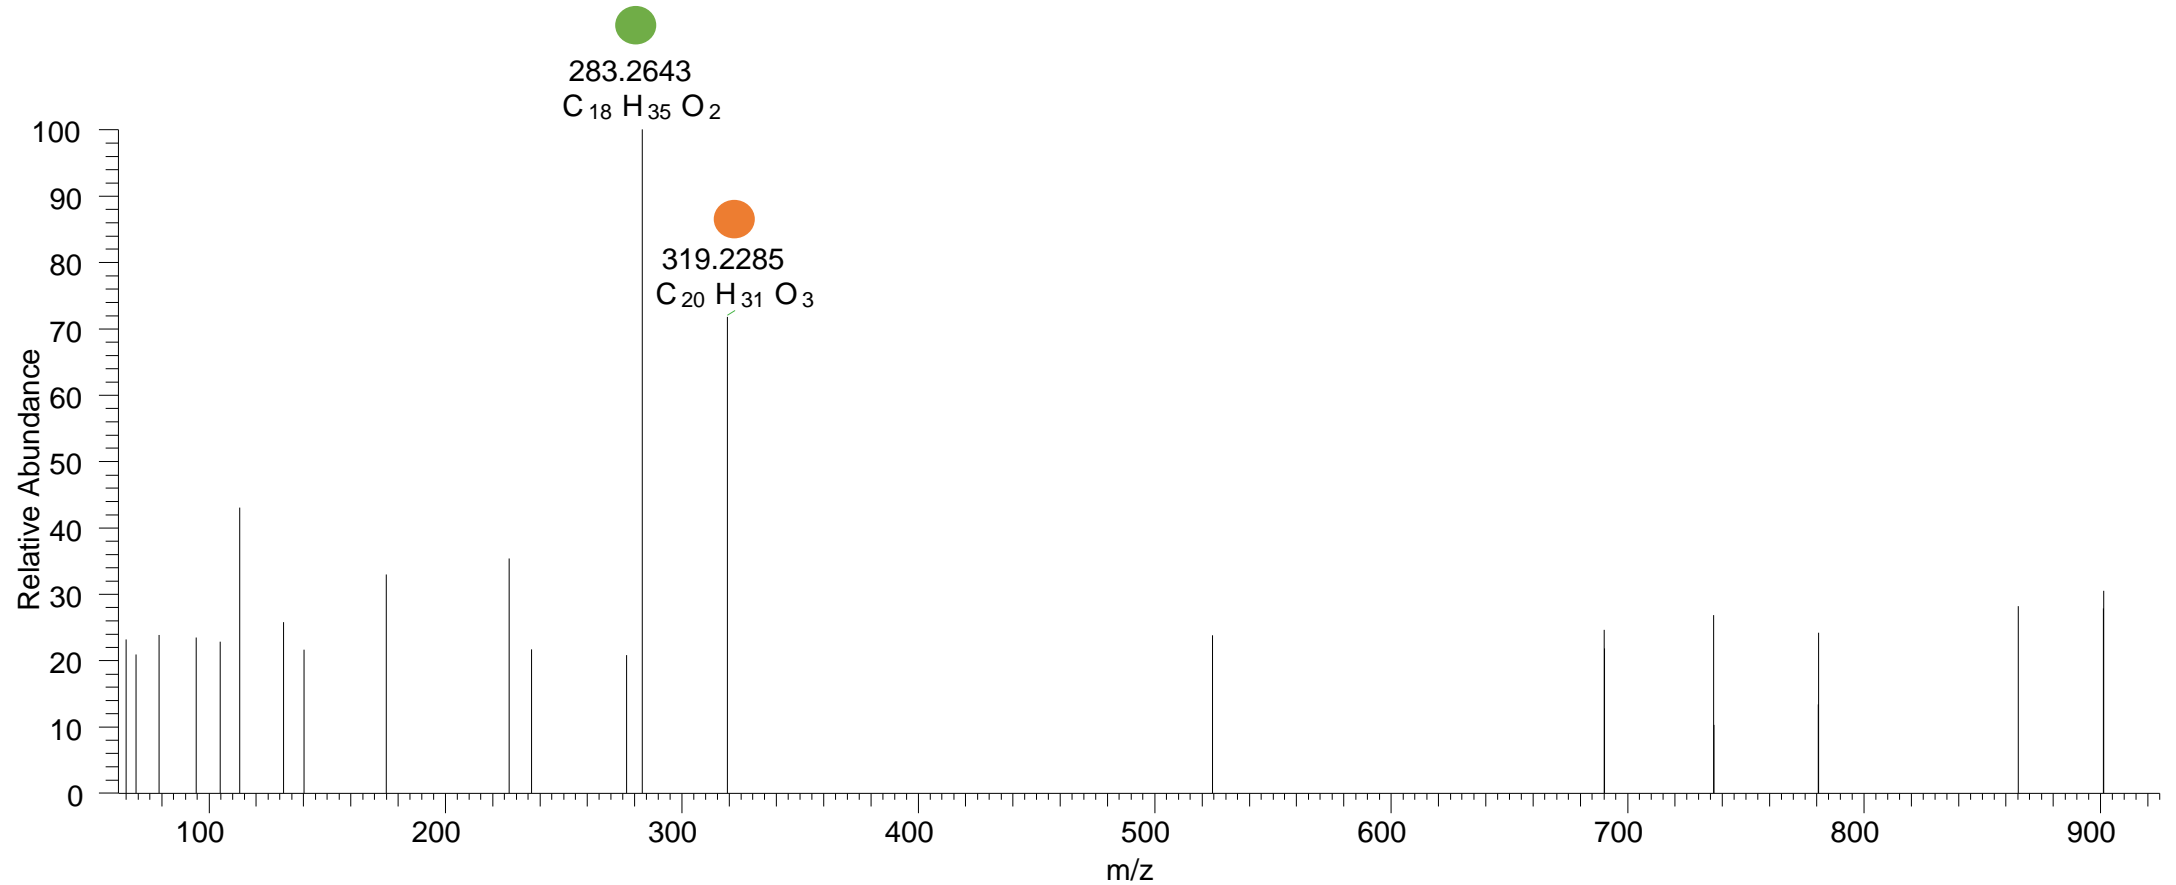



# PC(18:0\_22:6<O>)

[oxPC+HCOO]<sup>-</sup> XIC 894.5866 NL: 2.88E3

## RT 15.1-15.8

- Fragments containing oxFAs
- Fragments related to water loss
- Fragments not containing oxFAs
- Fragments containing methylated oxFAs
- Fragments related to CO<sub>2</sub> loss
- Position-specific fragments

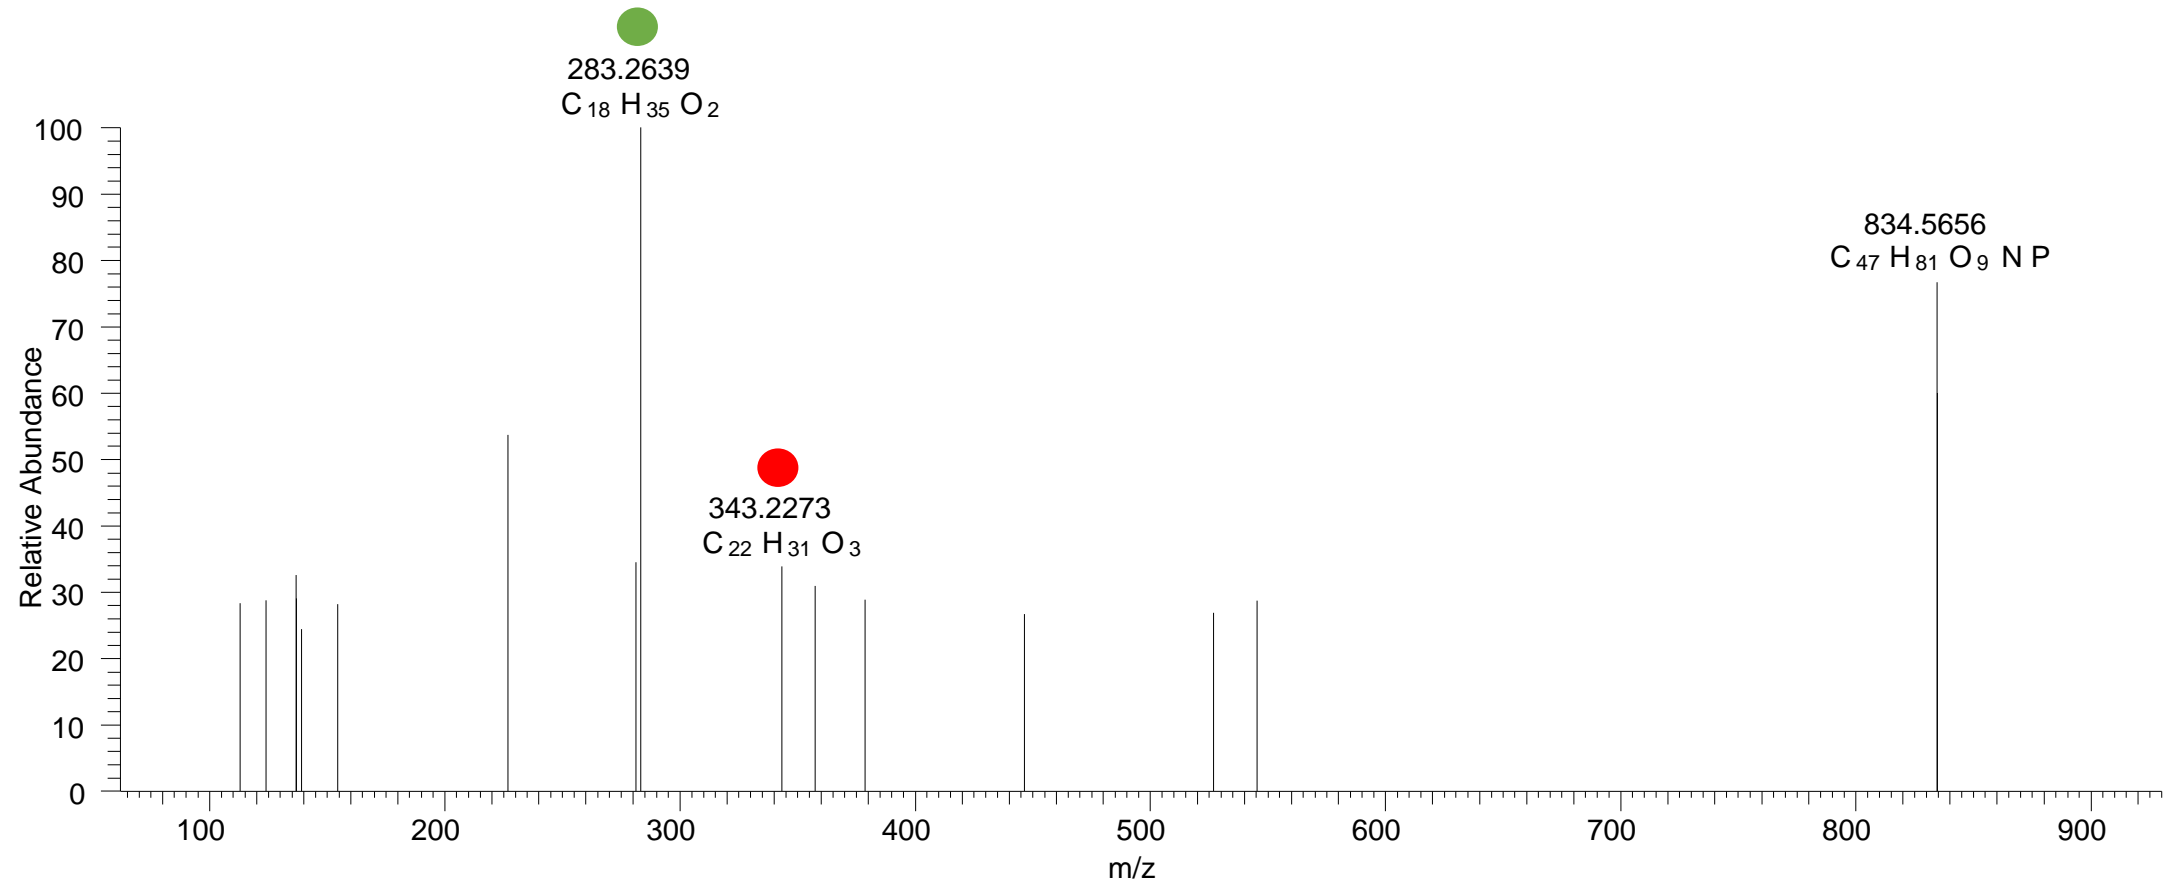

Supplement: 41467_2022_33225_MOESM9_ESM.pdf [file 41467_2022_33225_MOESM9_ESM.pdf]
