# Supplementary material for: Analytical and computational workflow for in-depth analysis of oxidized complex lipids in blood plasma
Source: PubMed Central journal article supplement (PMC9626469; doi:10.1038/s41467-022-33225-9), 2022-11-01

## Supplementary Data 7.

MS2 spectra acquired using stDDA and used for the annotation of **oxidized CE** (oxCE) species in group pooled blood plasma samples of obese non-diabetic (OND) and obese with type 2 diabetes (OT2D) individuals. Structure-related fragmentation ions are colour-coded according to the legend provided. Annotated lipids for each group pool are sorted by their precursor  $m/z$ .

**OND\_pool**

# CE(5:0<oxo{5}>) RT 18.4

[oxCE+Na]<sup>+</sup>

XIC 507.3809 NL: 1.33E5

- Fragments containing oxFAs
- Fragments related to water loss
- Fragments not containing oxFAs
- Position-specific fragments
- Fragments related to other oxLPPs

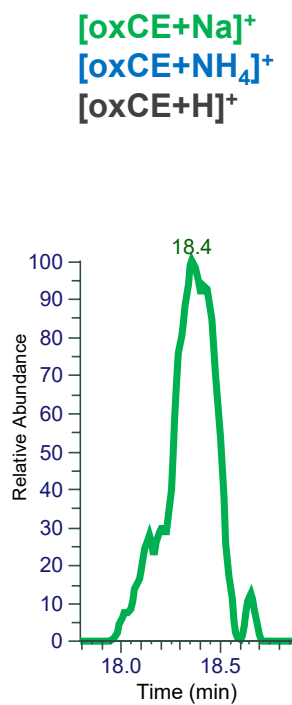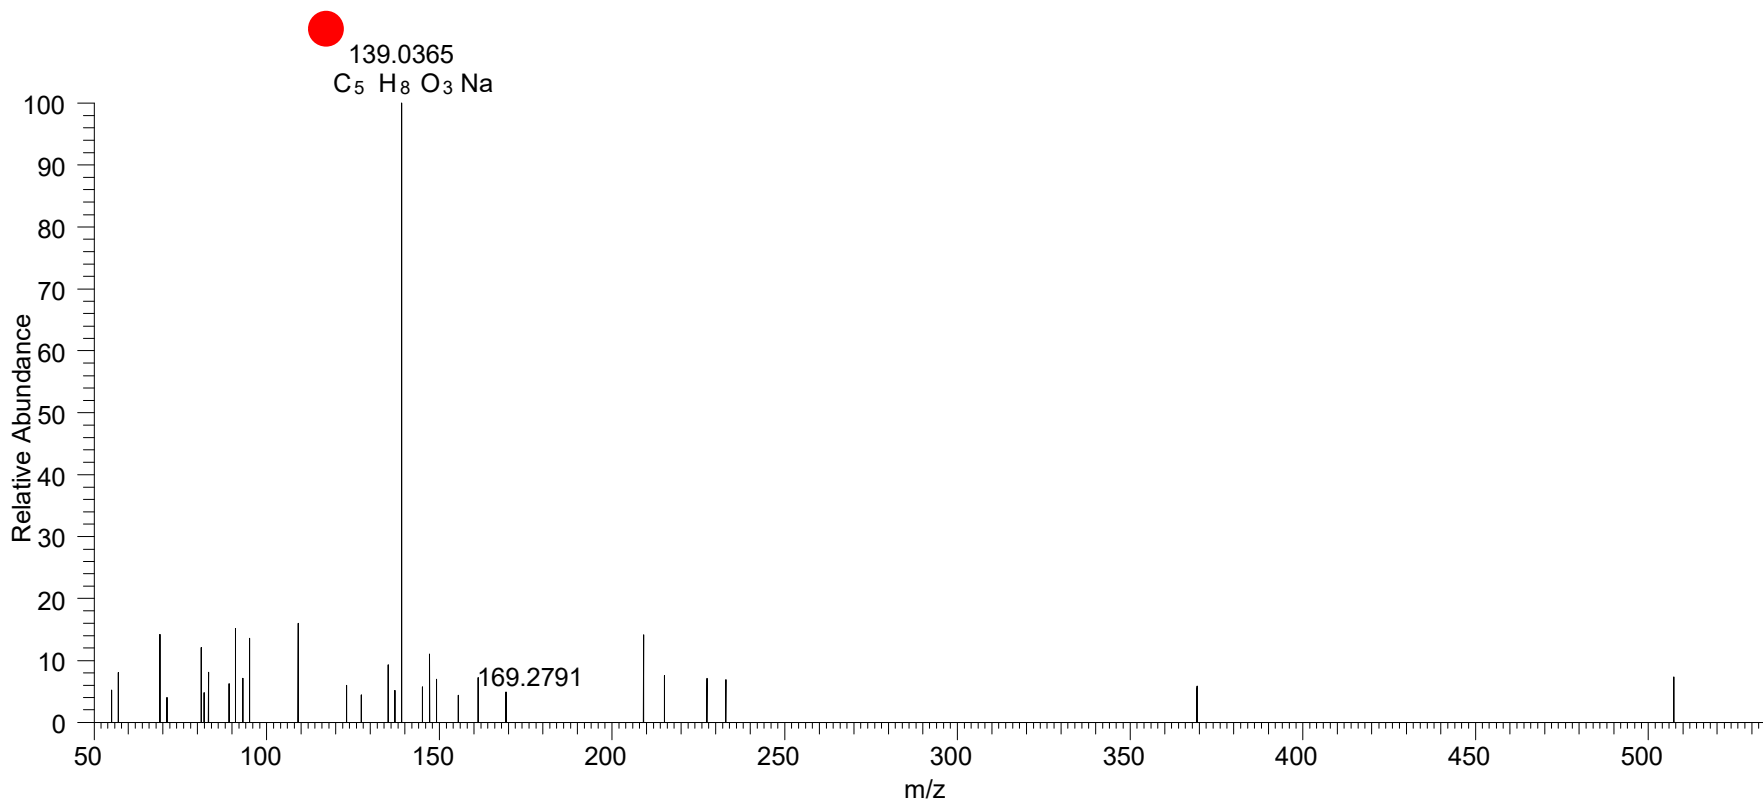

# CE(7:1<oxo{7}>) RT 20.7

[oxCE+Na]<sup>+</sup>

XIC 533.3965 NL: 6.88E4

- Fragments containing oxFAs
- Fragments related to water loss
- Fragments not containing oxFAs
- Position-specific fragments
- Fragments related to other oxLPPs

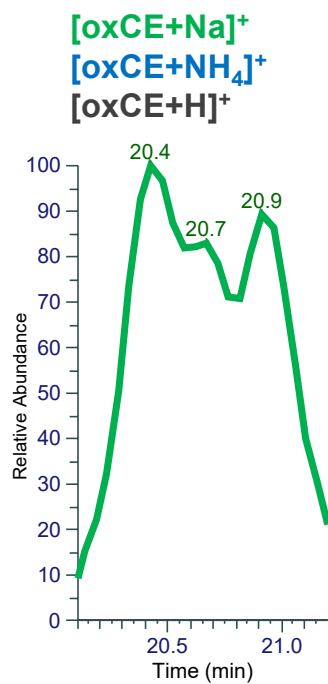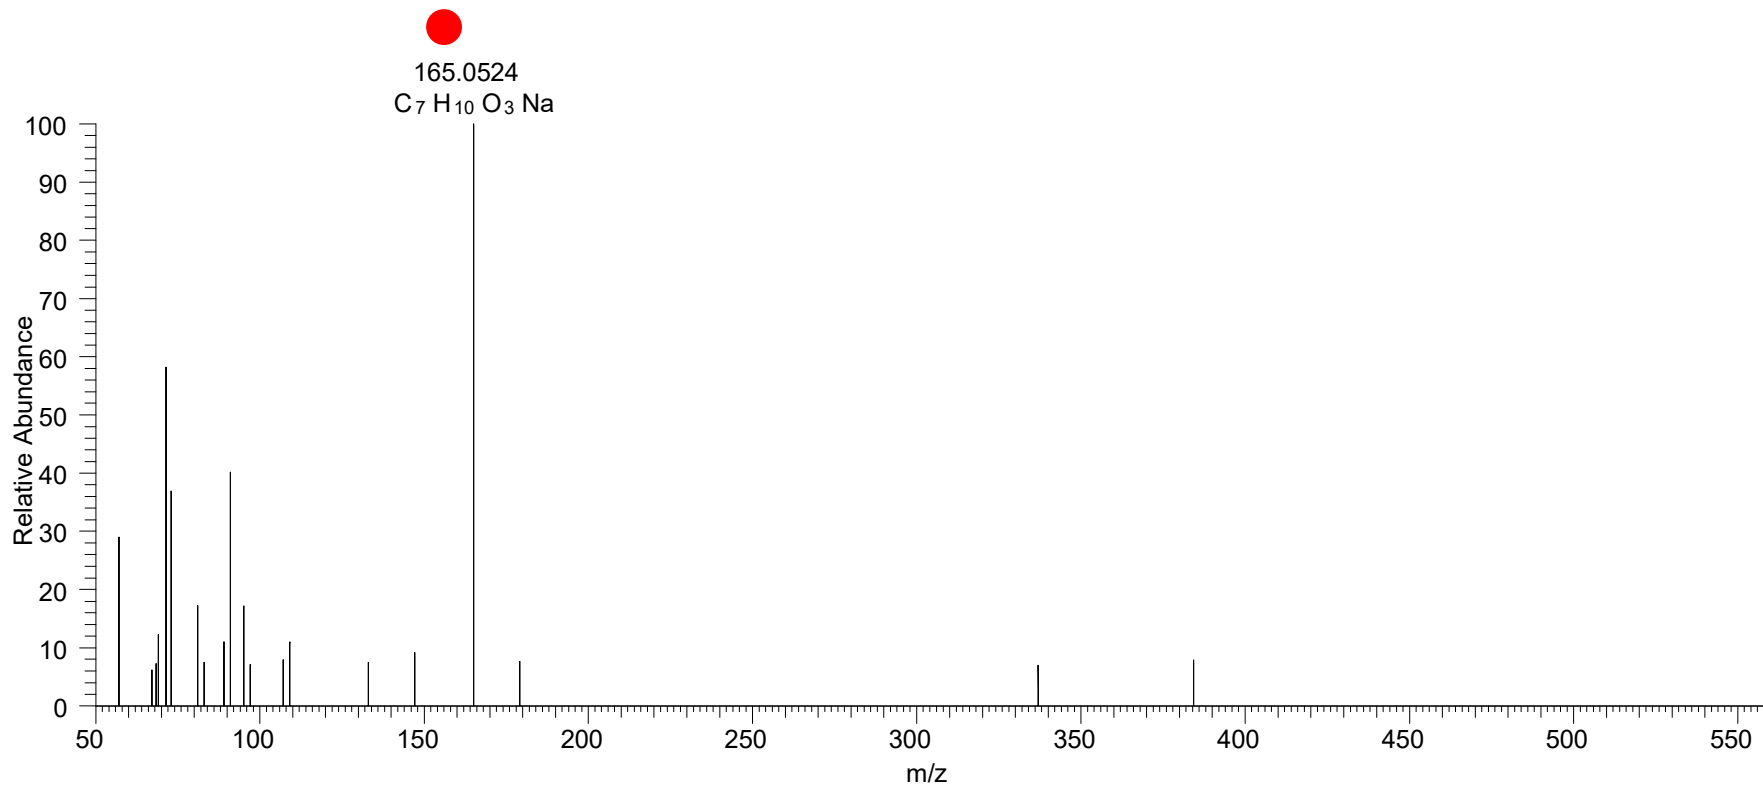

# CE(7:0<oxo{7}>) RT 18.7

[oxCE+Na]<sup>+</sup>

XIC 535.4122 NL: 7.18E4

- Fragments containing oxFAs
- Fragments related to water loss
- Fragments not containing oxFAs
- Position-specific fragments
- Fragments related to other oxLPPs

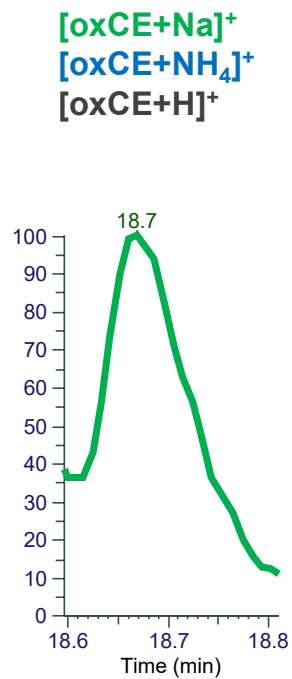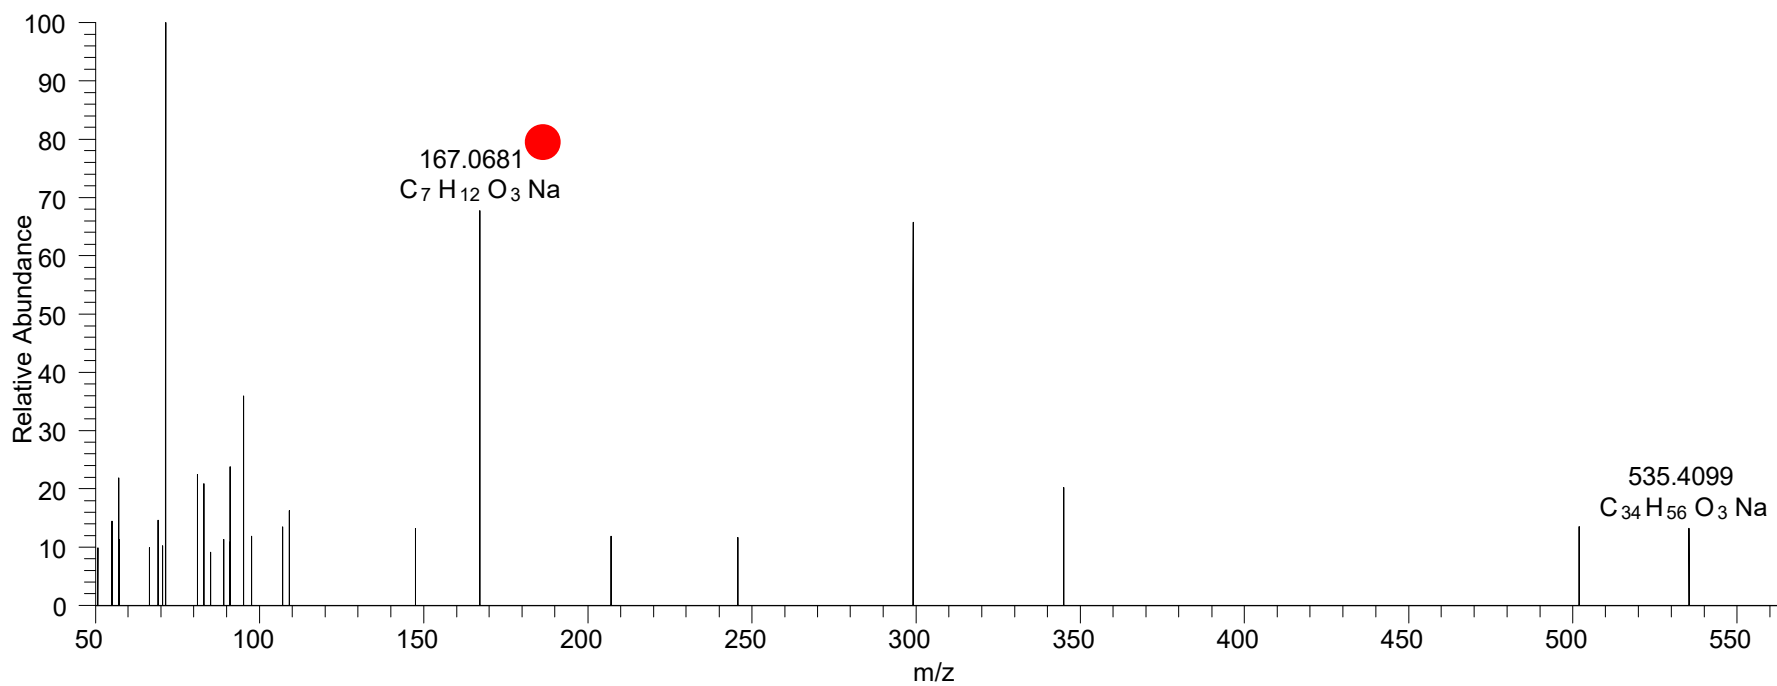

# CE(9:0<oxo{9}>) RT 20.9

[oxCE+Na]<sup>+</sup>

XIC 563.4435 NL: 8.78E5

- Fragments containing oxFAs
- Fragments related to water loss
- Fragments not containing oxFAs
- Position-specific fragments
- Fragments related to other oxLPPs

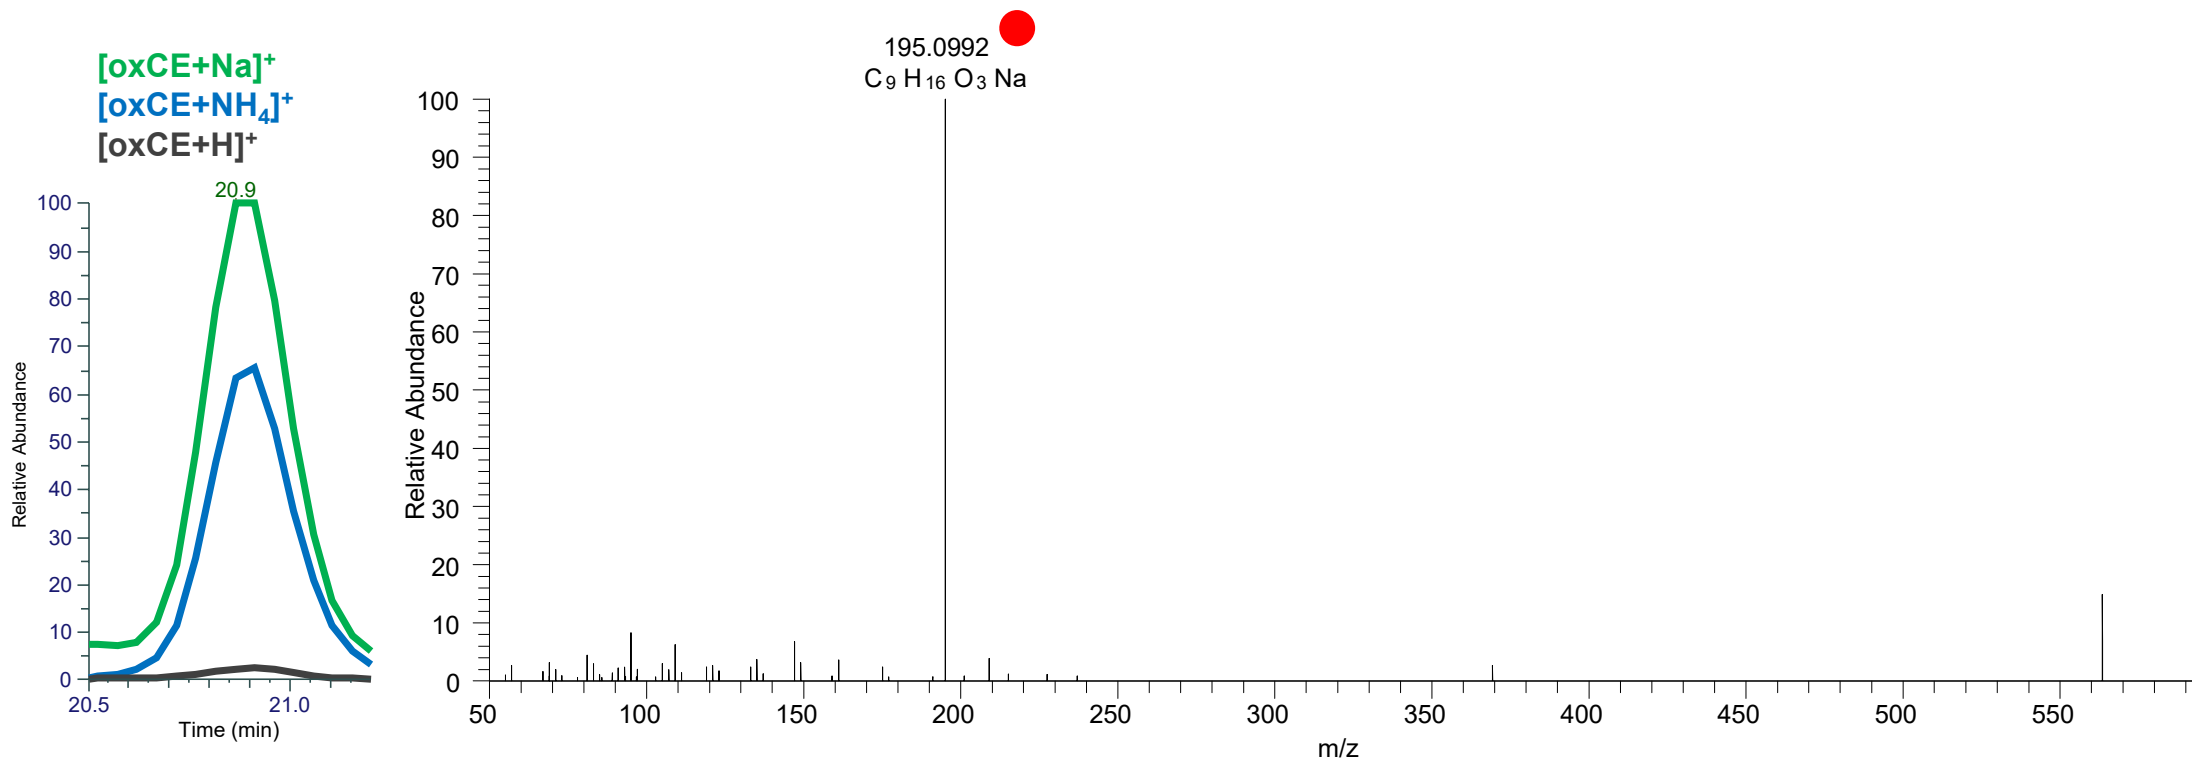

# CE(10:2<oxo{10}>) RT 20.8

[oxCE+Na]<sup>+</sup>

XIC 573.4278 NL: 2.02E5

- Fragments containing oxFAs
- Fragments related to water loss
- Fragments not containing oxFAs
- Position-specific fragments
- Fragments related to other oxLPPs

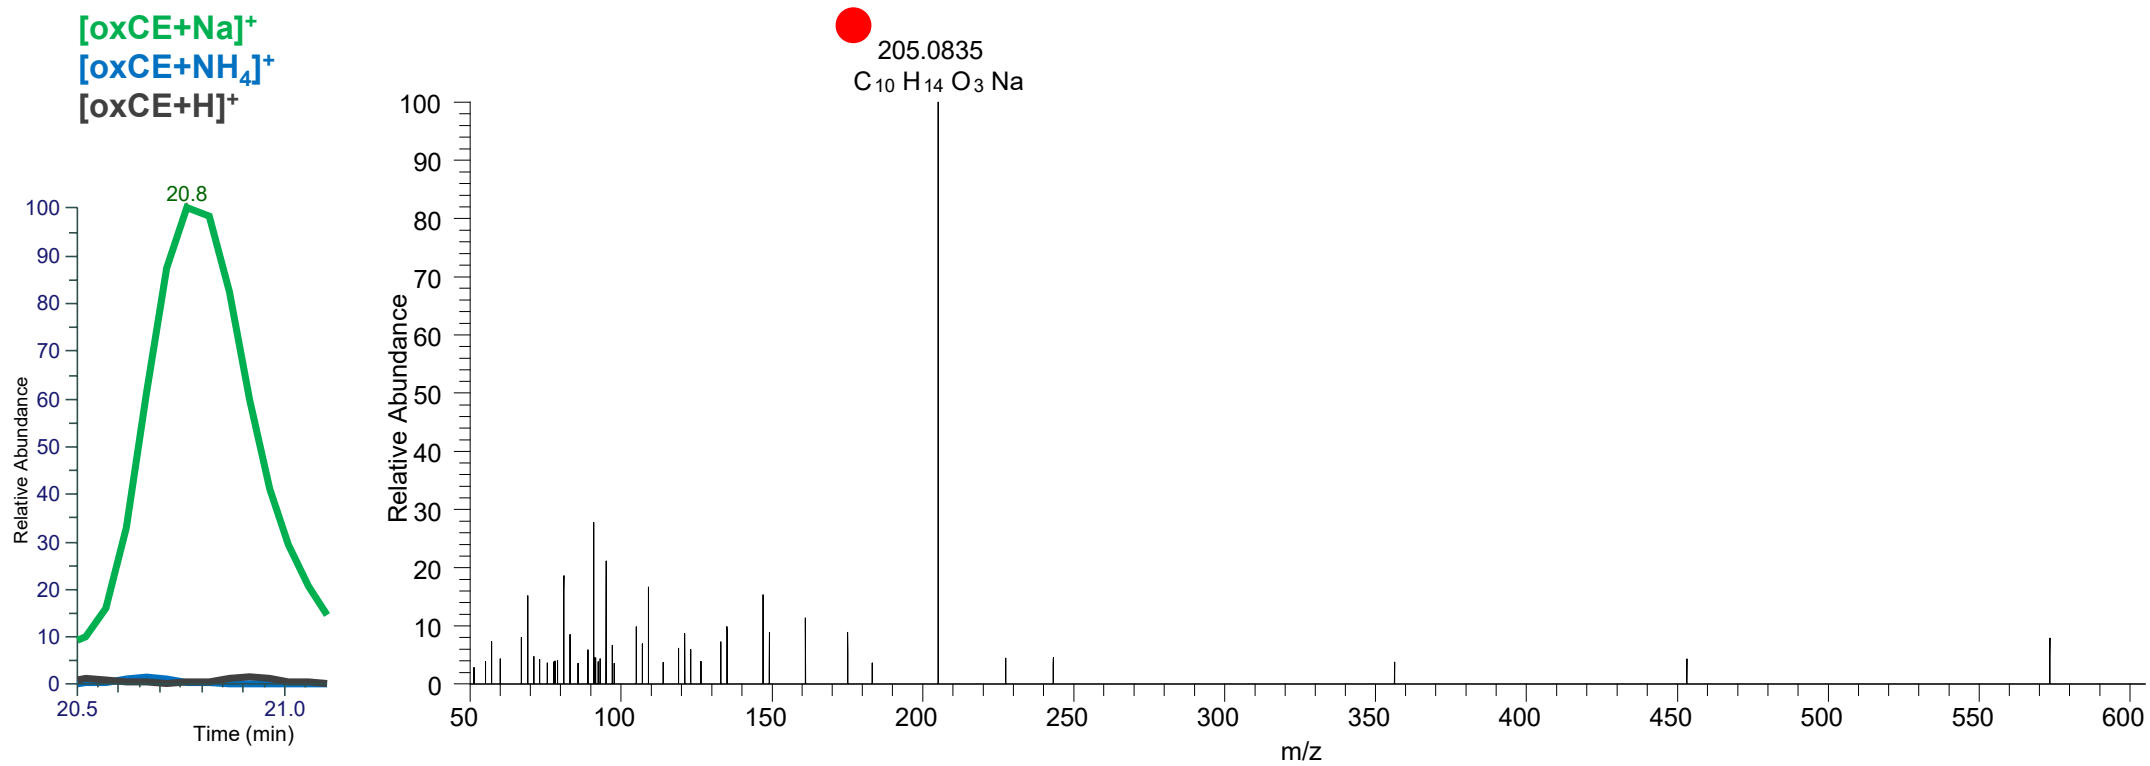

# CE(10:1<oxo{10}>) RT 20.7

[oxCE+Na]<sup>+</sup>

XIC 575.4440 NL: 1.58E4

- Fragments containing oxFAs
- Fragments related to water loss
- Fragments not containing oxFAs
- Position-specific fragments
- Fragments related to other oxLPPs

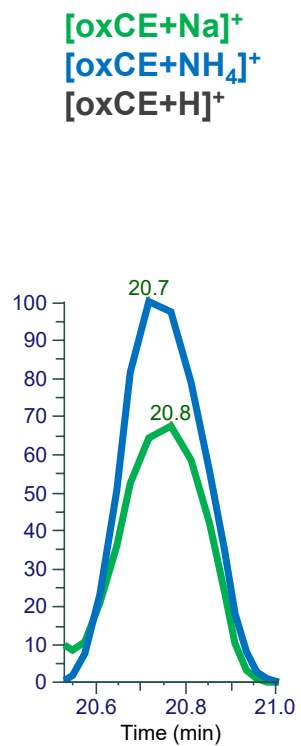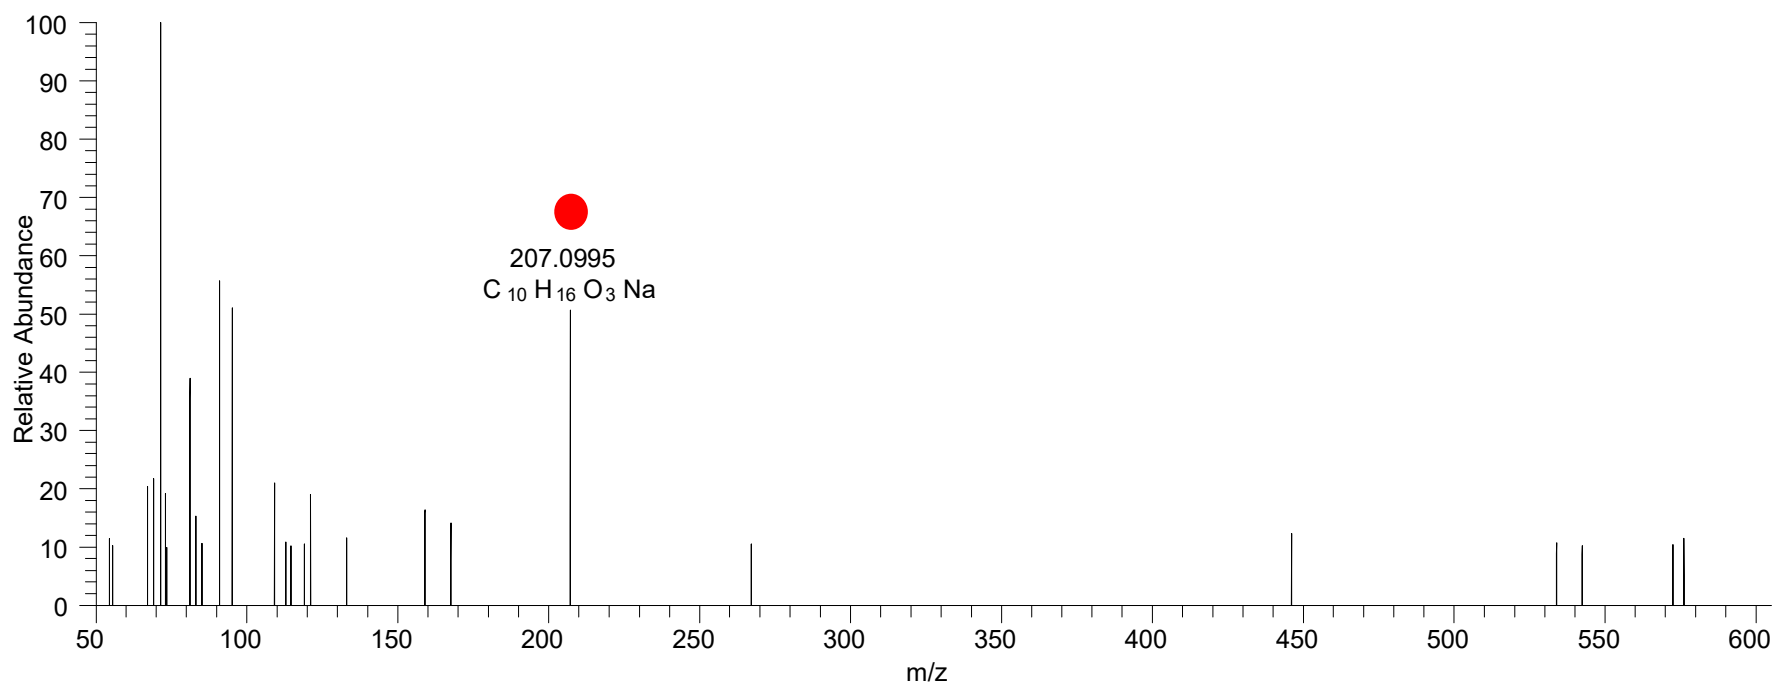



# CE(11:2<oxo{11}>) RT 20.3

[oxCE+Na]<sup>+</sup>

XIC 587.4440 NL: 3.04E4

- Fragments containing oxFAs
- Fragments related to water loss
- Fragments not containing oxFAs
- Position-specific fragments
- Fragments related to other oxLPPs

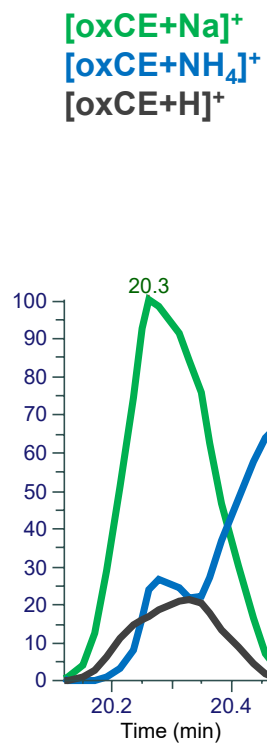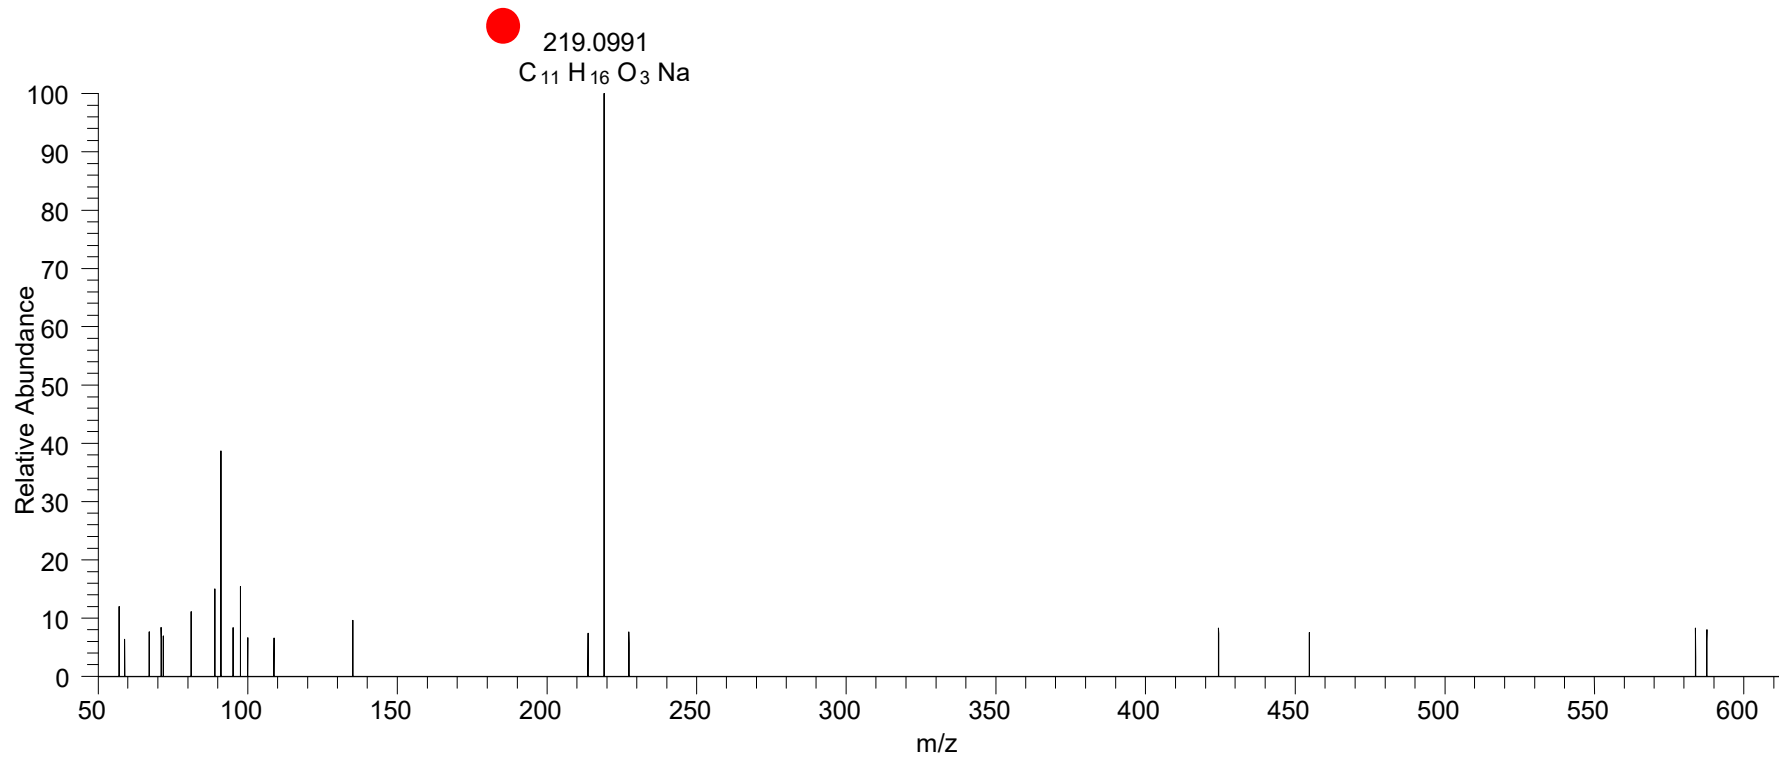

# CE(11:1<oxo{11}>) RT 21.4

[oxCE+Na]<sup>+</sup>

XIC 589.4591 NL: 1.12E5

- Fragments containing oxFAs
- Fragments related to water loss
- Fragments not containing oxFAs
- Position-specific fragments
- Fragments related to other oxLPPs

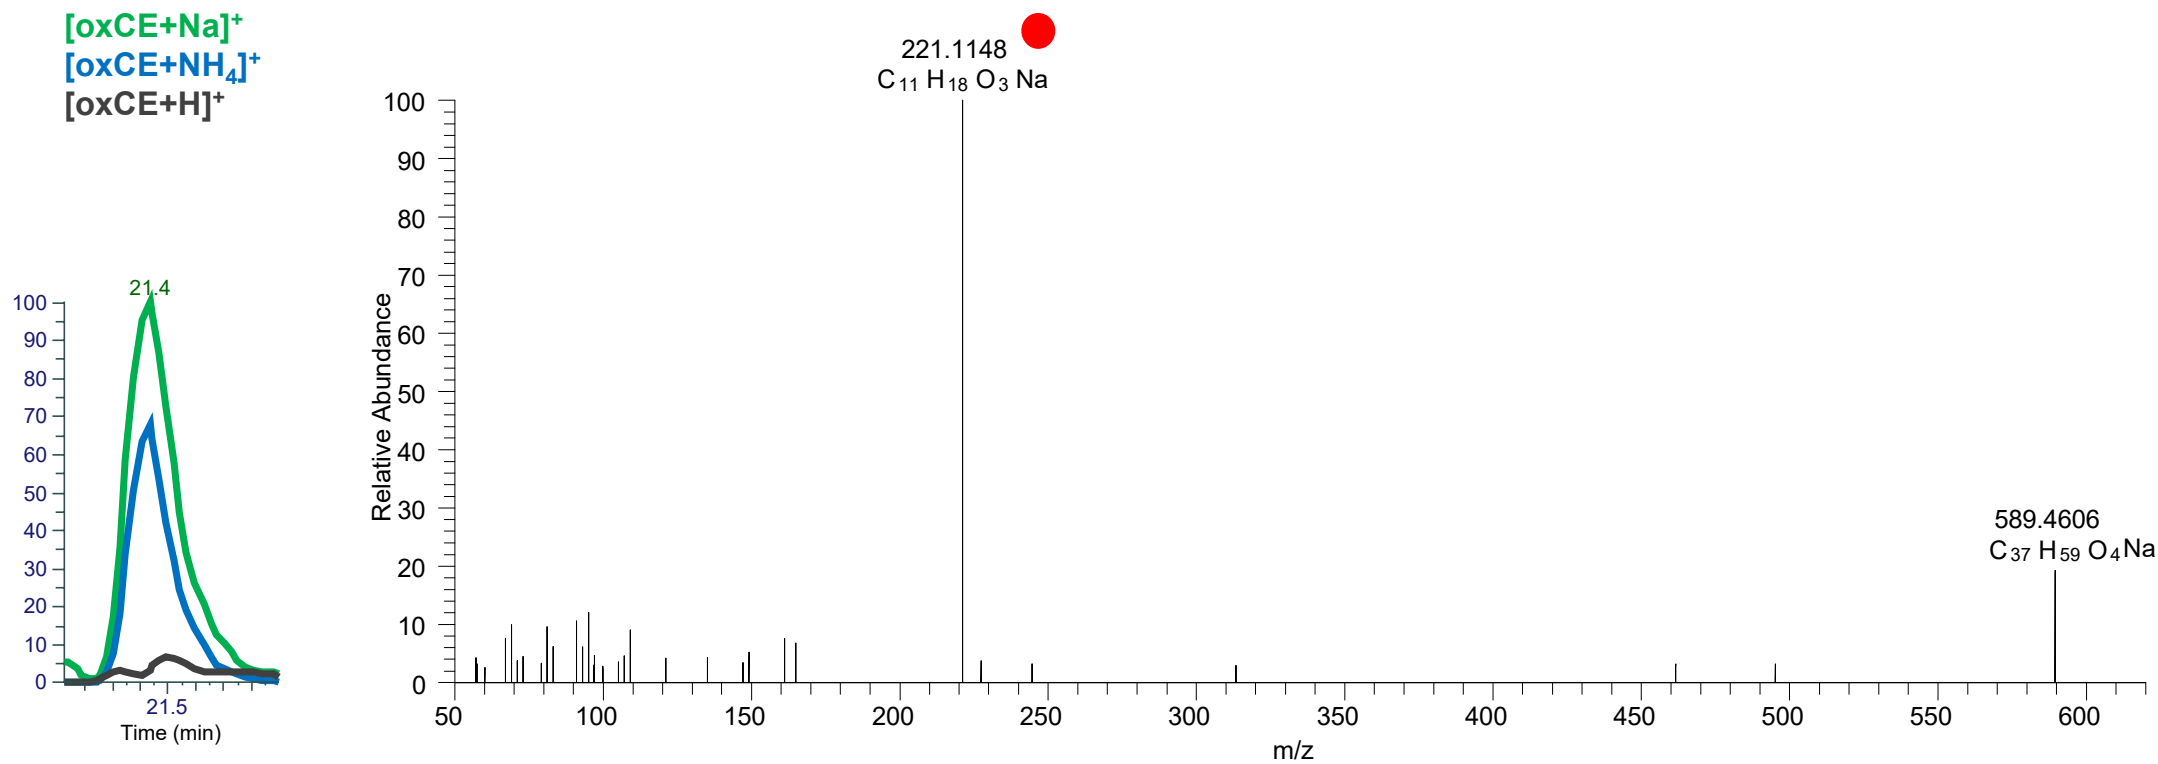

# CE(10:1<COOH{10}>) RT 19.8

[oxCE+Na]<sup>+</sup>

XIC 591.4384 NL: 2.06E4

- Fragments containing oxFAs
- Fragments related to water loss
- Fragments not containing oxFAs
- Position-specific fragments
- Fragments related to other oxLPPs

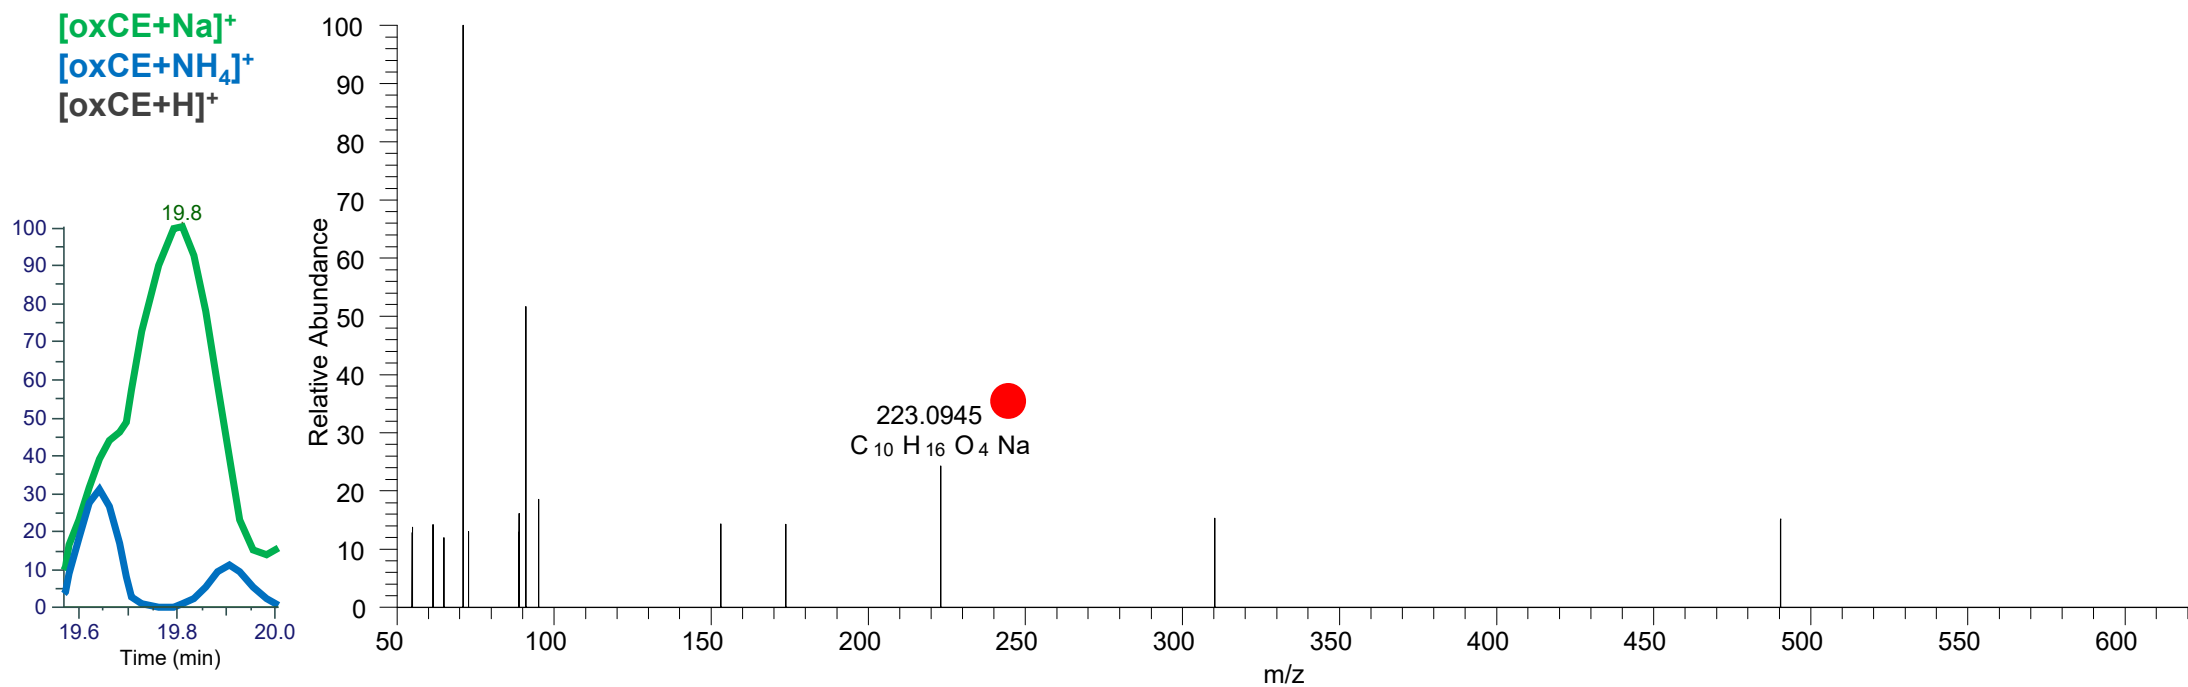

# CE(12:2<COOH{12}>) RT 20.6

[oxCE+Na]<sup>+</sup>

XIC 617.4540 NL: 1.48E4

- Fragments containing oxFAs
- Fragments related to water loss
- Fragments not containing oxFAs
- Position-specific fragments
- Fragments related to other oxLPPs

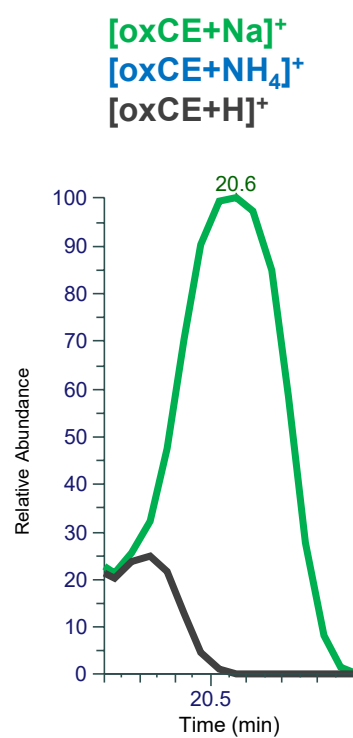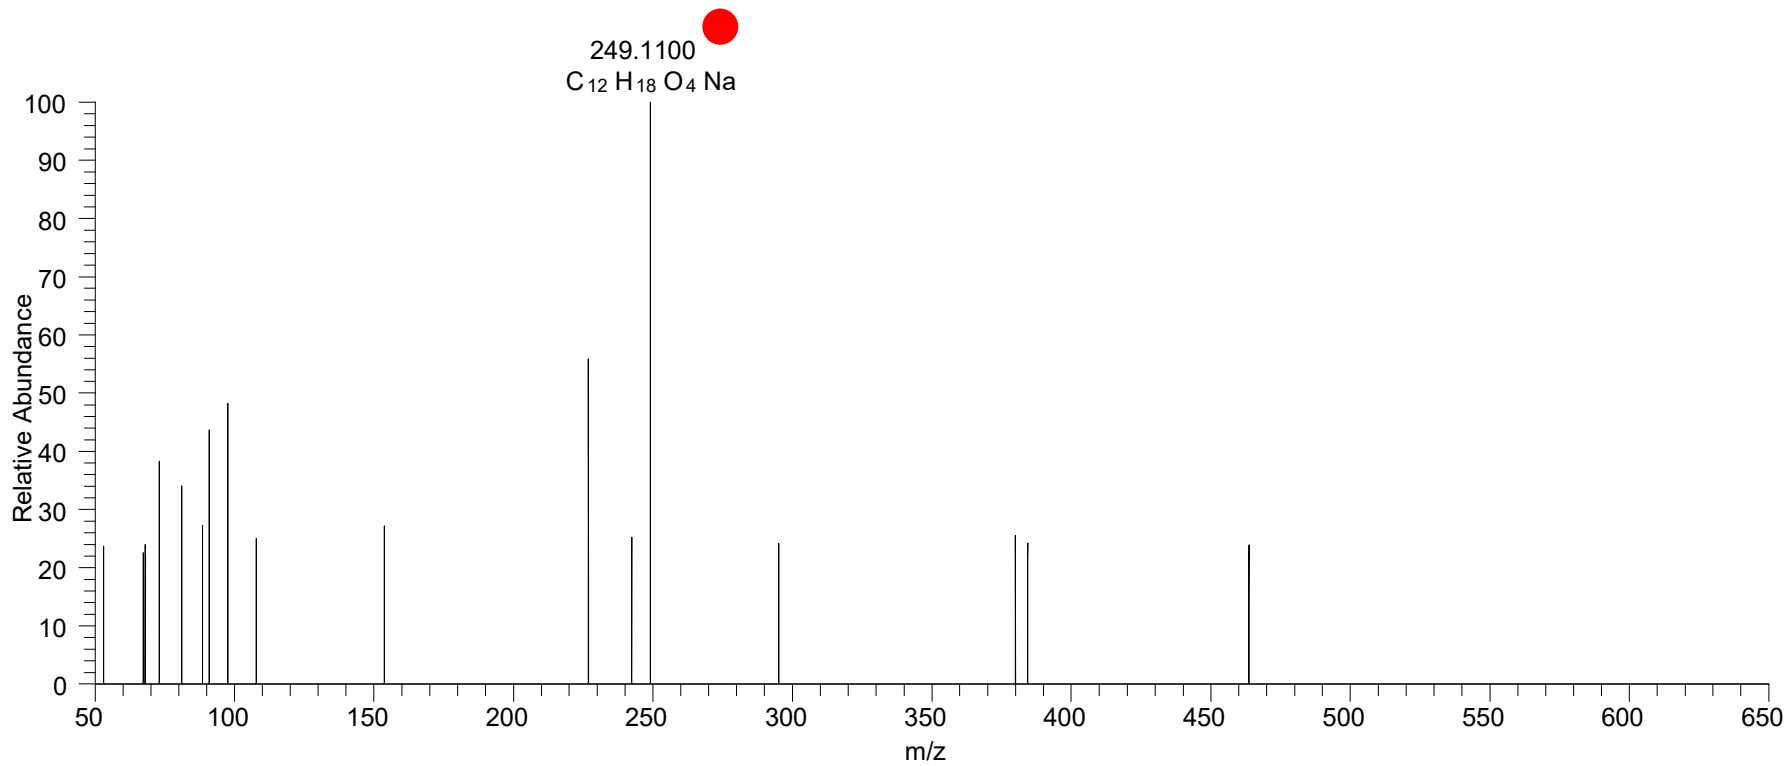

# CE(12:1<COOH{12}>) RT 20.3

[oxCE+Na]<sup>+</sup>

XIC 619.4697 NL: 3.86E4

- Fragments containing oxFAs
- Fragments related to water loss
- Fragments not containing oxFAs
- Position-specific fragments
- Fragments related to other oxLPPs

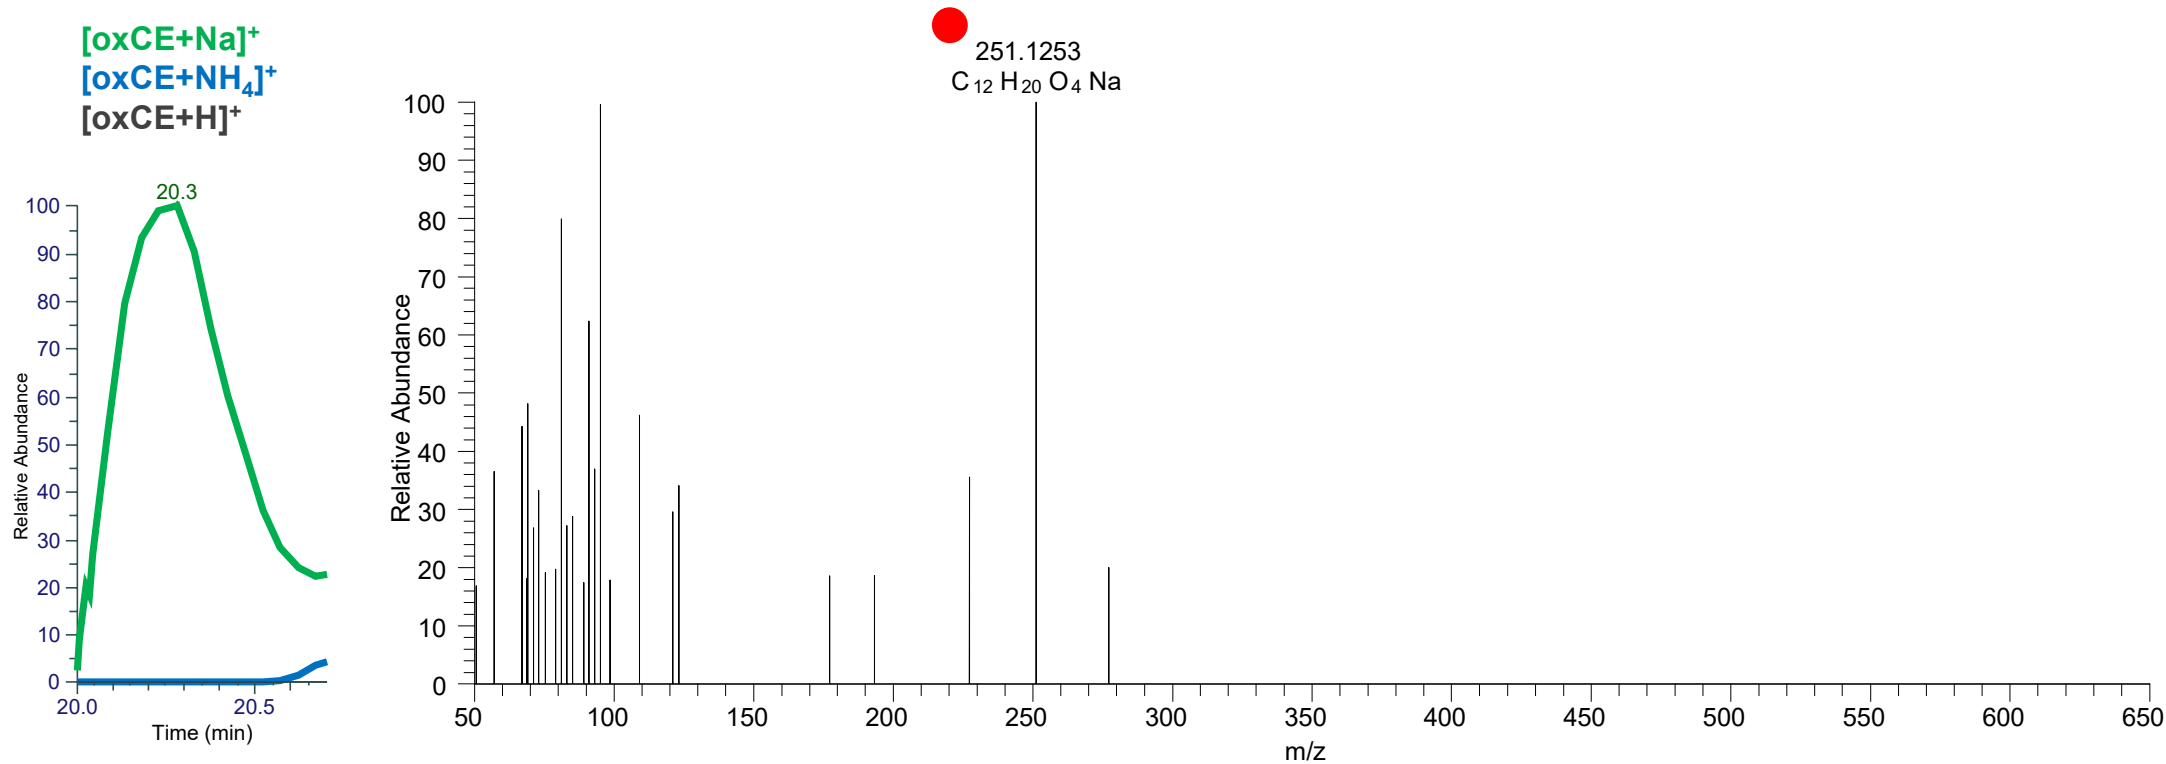

# CE(18:3<O>) RT 22.6

[oxCE+Na]<sup>+</sup>

XIC 685.5530 NL: 6.866E4

- Fragments containing oxFAs
- Fragments related to water loss
- Fragments not containing oxFAs
- Position-specific fragments
- Fragments related to other oxLPPs

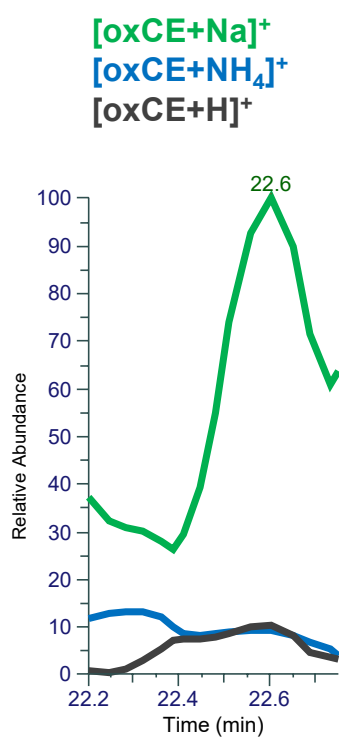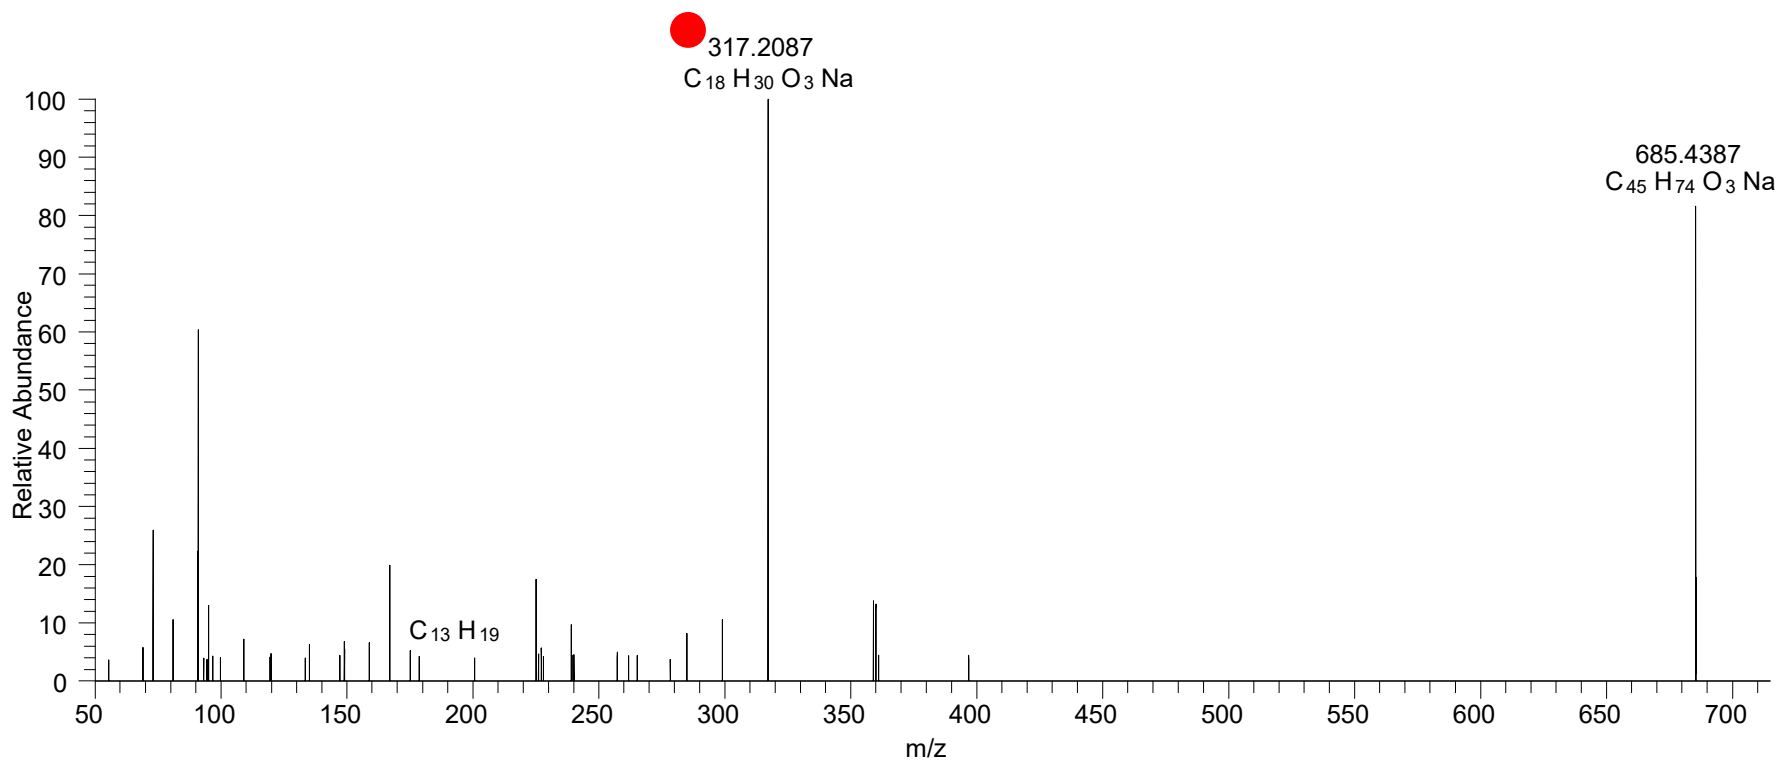

# CE(18:3<OH>) RT 23.3

[oxCE+Na]<sup>+</sup>

XIC 685.5530 NL: 1.89E6

- Fragments containing oxFAs
- Fragments related to water loss
- Fragments not containing oxFAs
- Position-specific fragments
- Fragments related to other oxLPPs

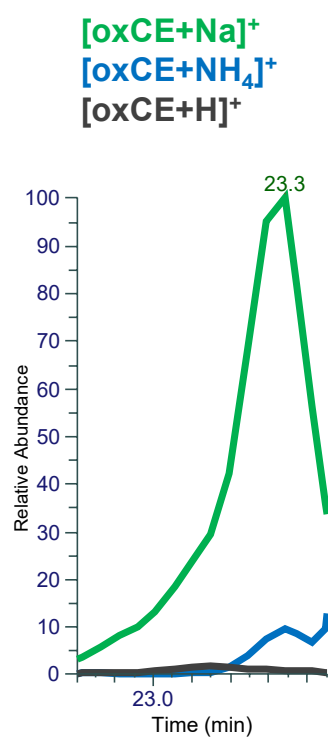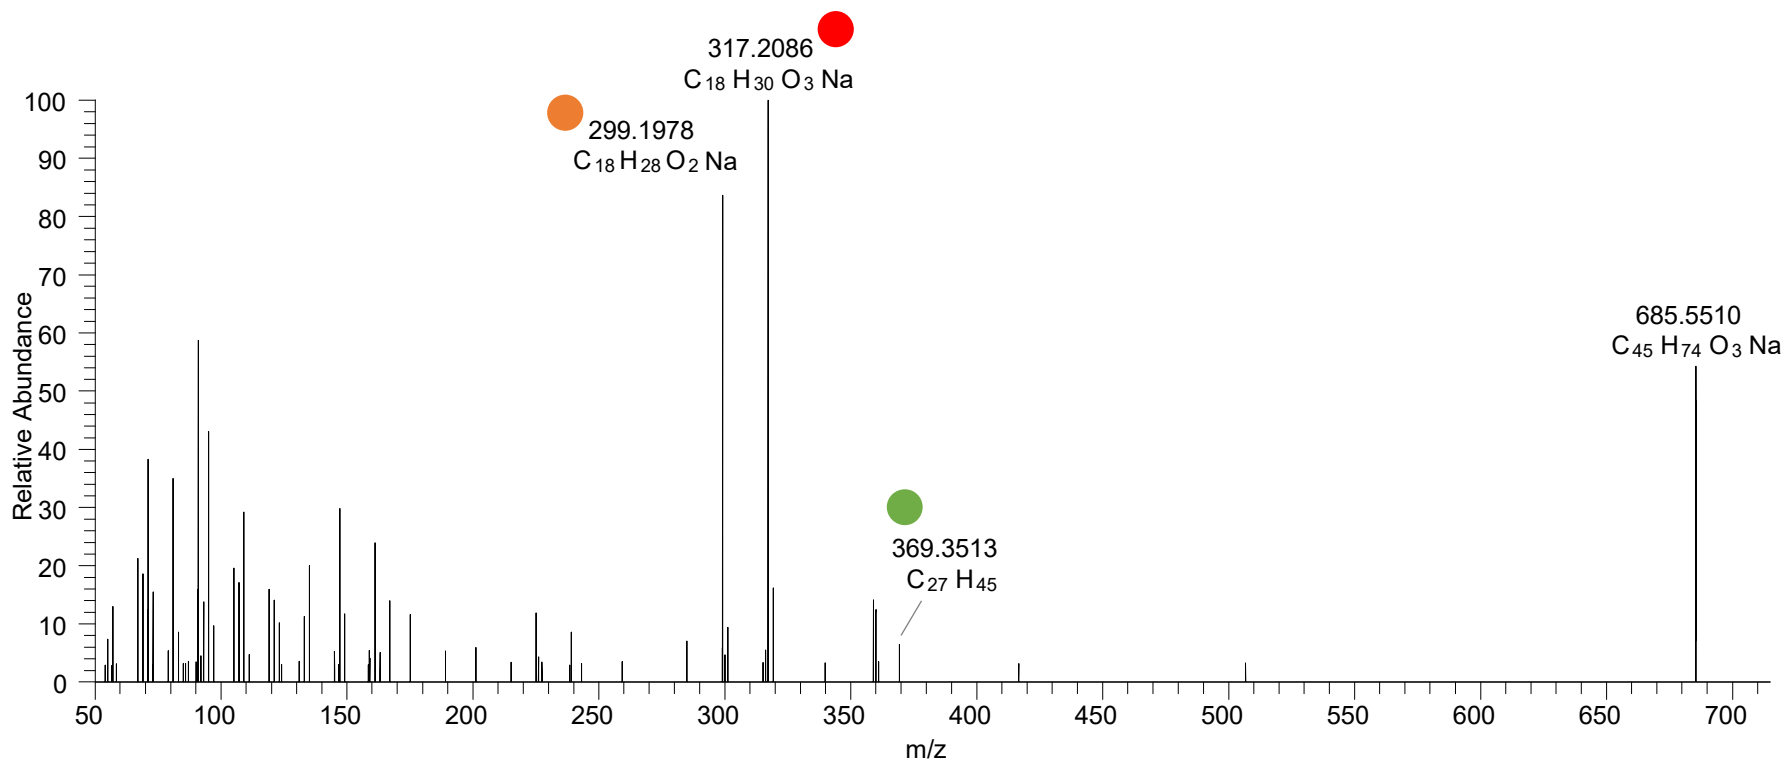

# CE(18:3<O>) RT 24.1

[oxCE+Na]<sup>+</sup>

XIC 685.5530 NL: 7.54E6

- Fragments containing oxFAs
- Fragments related to water loss
- Fragments not containing oxFAs
- Position-specific fragments
- Fragments related to other oxLPPs

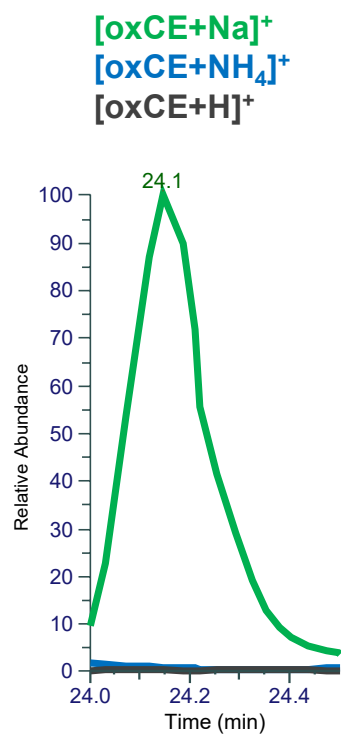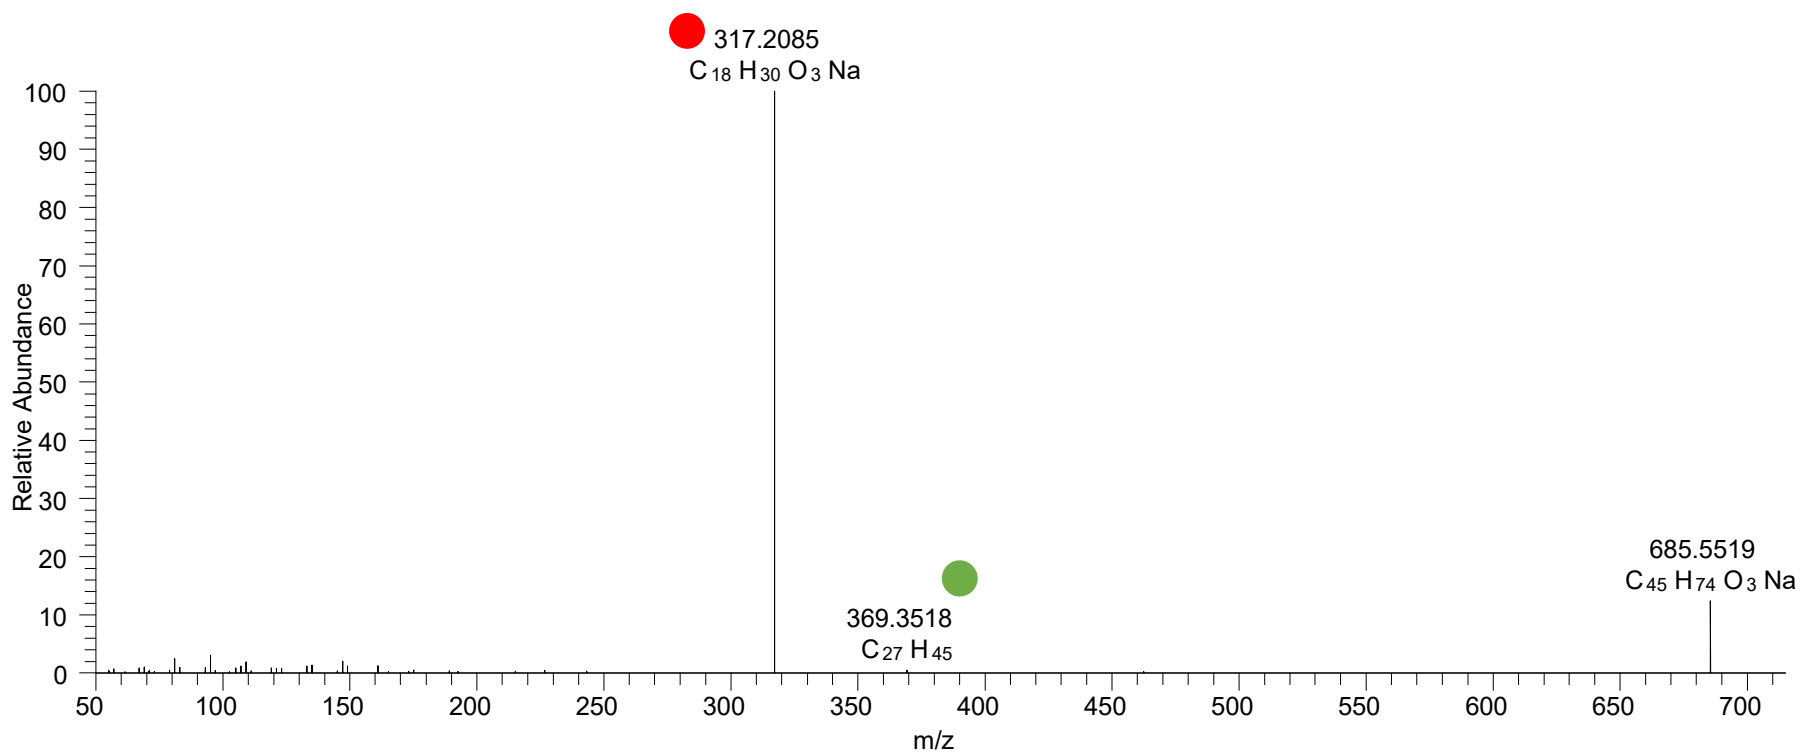



# CE(18:3<OH>) RT 25.0

[oxCE+Na]<sup>+</sup>

XIC 685.5530 NL: 3.68E5

- Fragments containing oxFAs
- Fragments related to water loss
- Fragments not containing oxFAs
- Position-specific fragments
- Fragments related to other oxLPPs

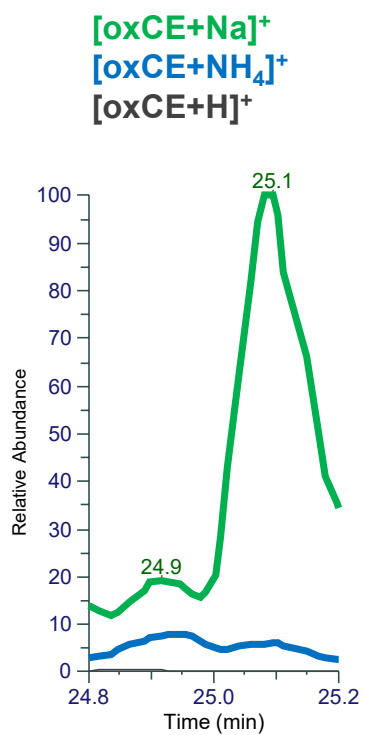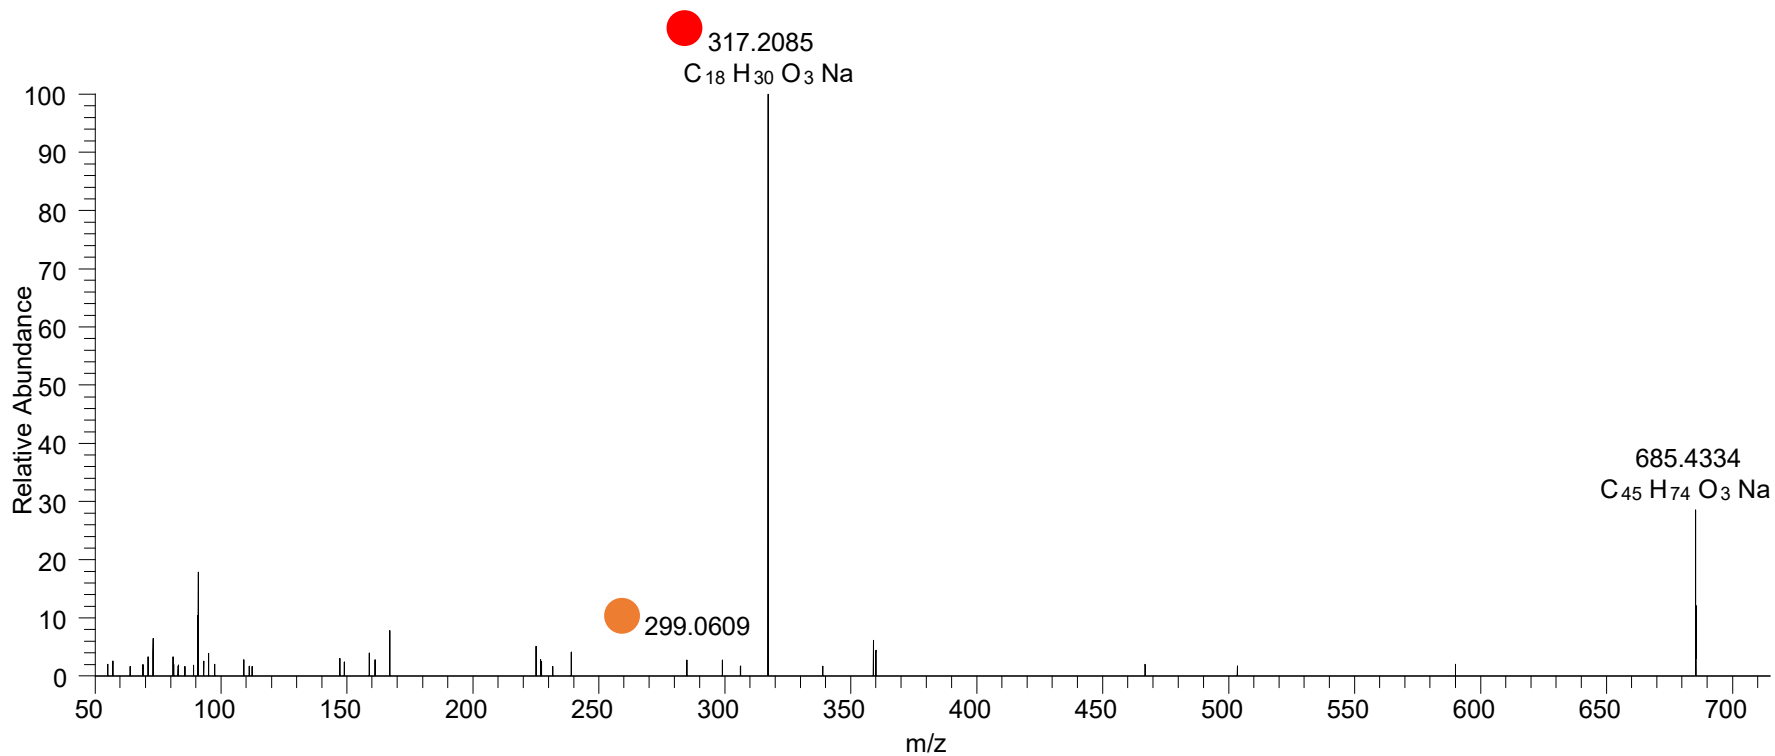

# CE(18:2<OH>) RT 23.5, 23.8

[oxCE+Na]<sup>+</sup>

XIC 687.5687 NL: 1.71E7

- Fragments containing oxFAs
- Fragments related to water loss
- Fragments not containing oxFAs
- Position-specific fragments
- Fragments related to other oxLPPs

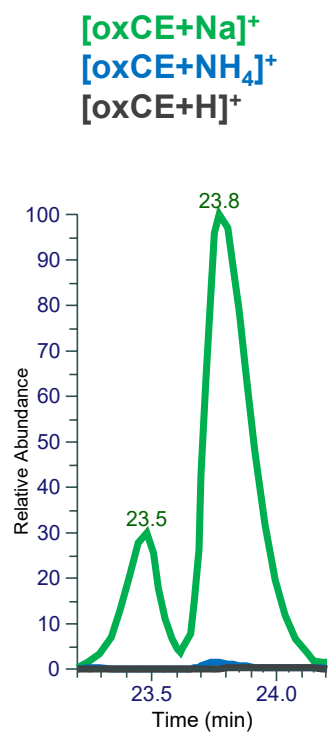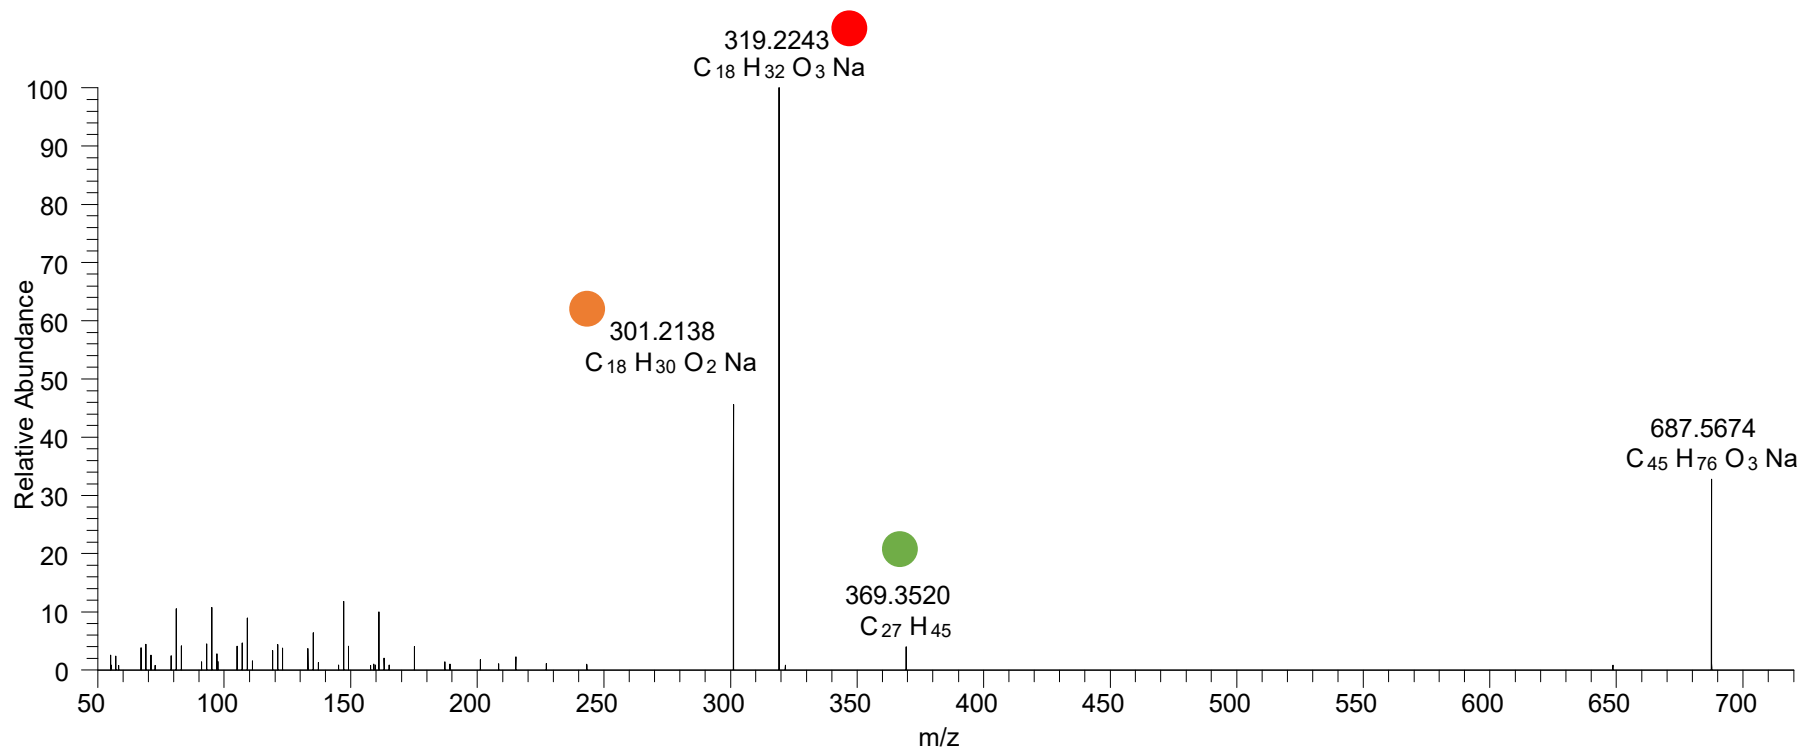

# CE(18:2<O>) RT 24.6, 25.2

[oxCE+Na]<sup>+</sup>

XIC 687.5687 NL: 3.03E5

- Fragments containing oxFAs
- Fragments related to water loss
- Fragments not containing oxFAs
- Position-specific fragments
- Fragments related to other oxLPPs

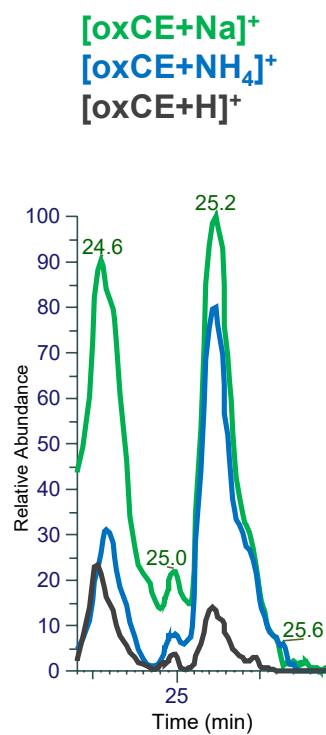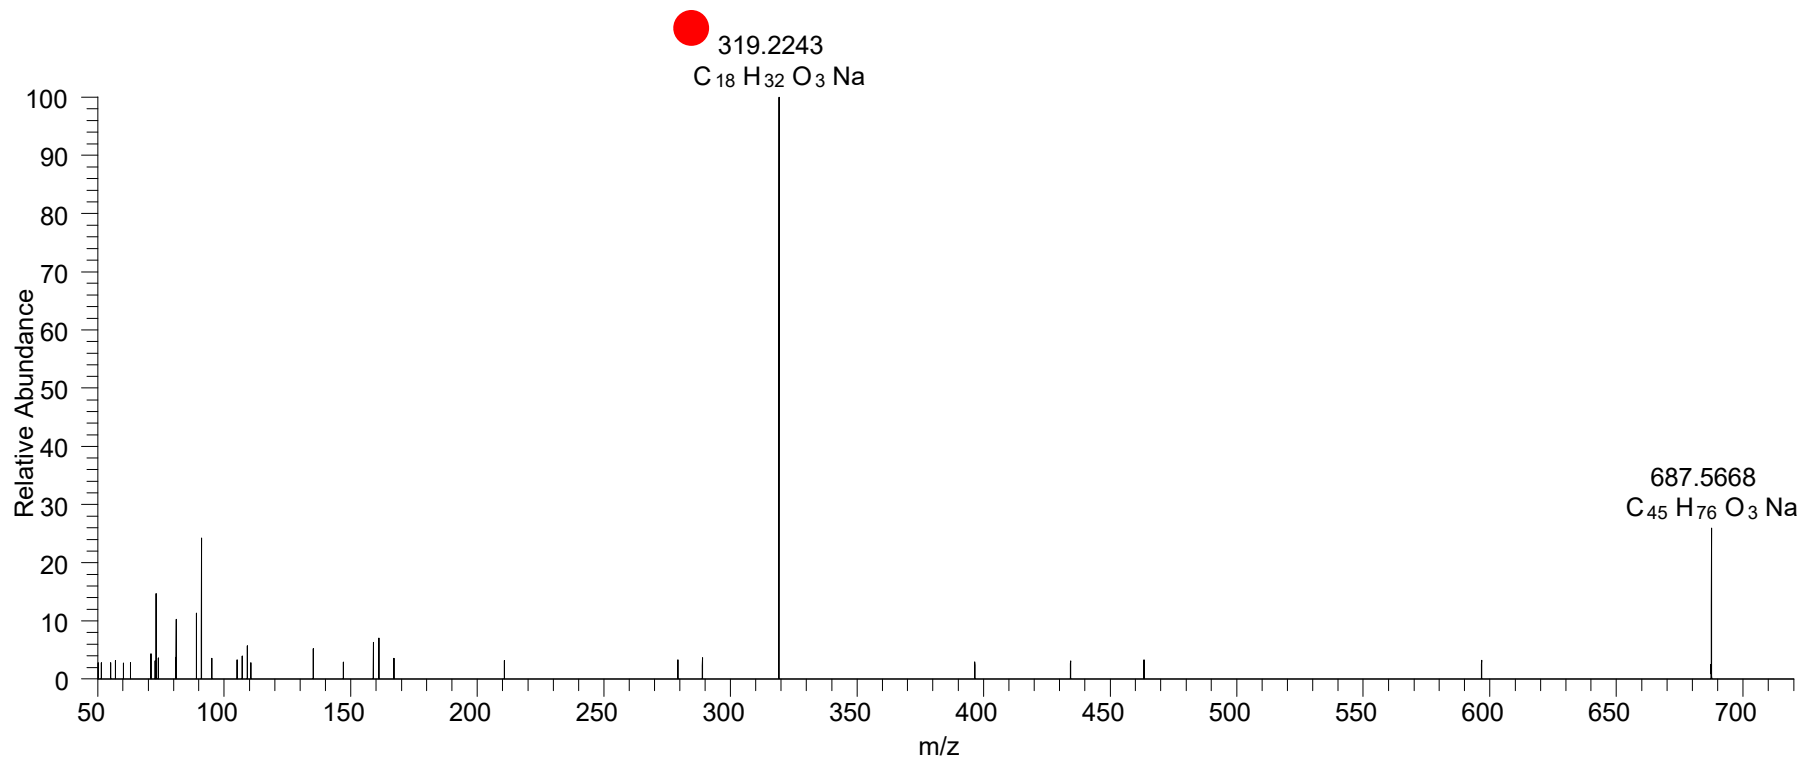

# CE(18:1<OH>) RT 24.2

[oxCE+Na]<sup>+</sup>

XIC 689.5843 NL: 5.26E5

- Fragments containing oxFAs
- Fragments related to water loss
- Fragments not containing oxFAs
- Position-specific fragments
- Fragments related to other oxLPPs

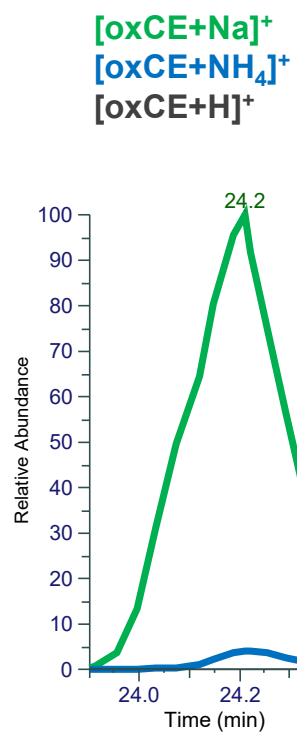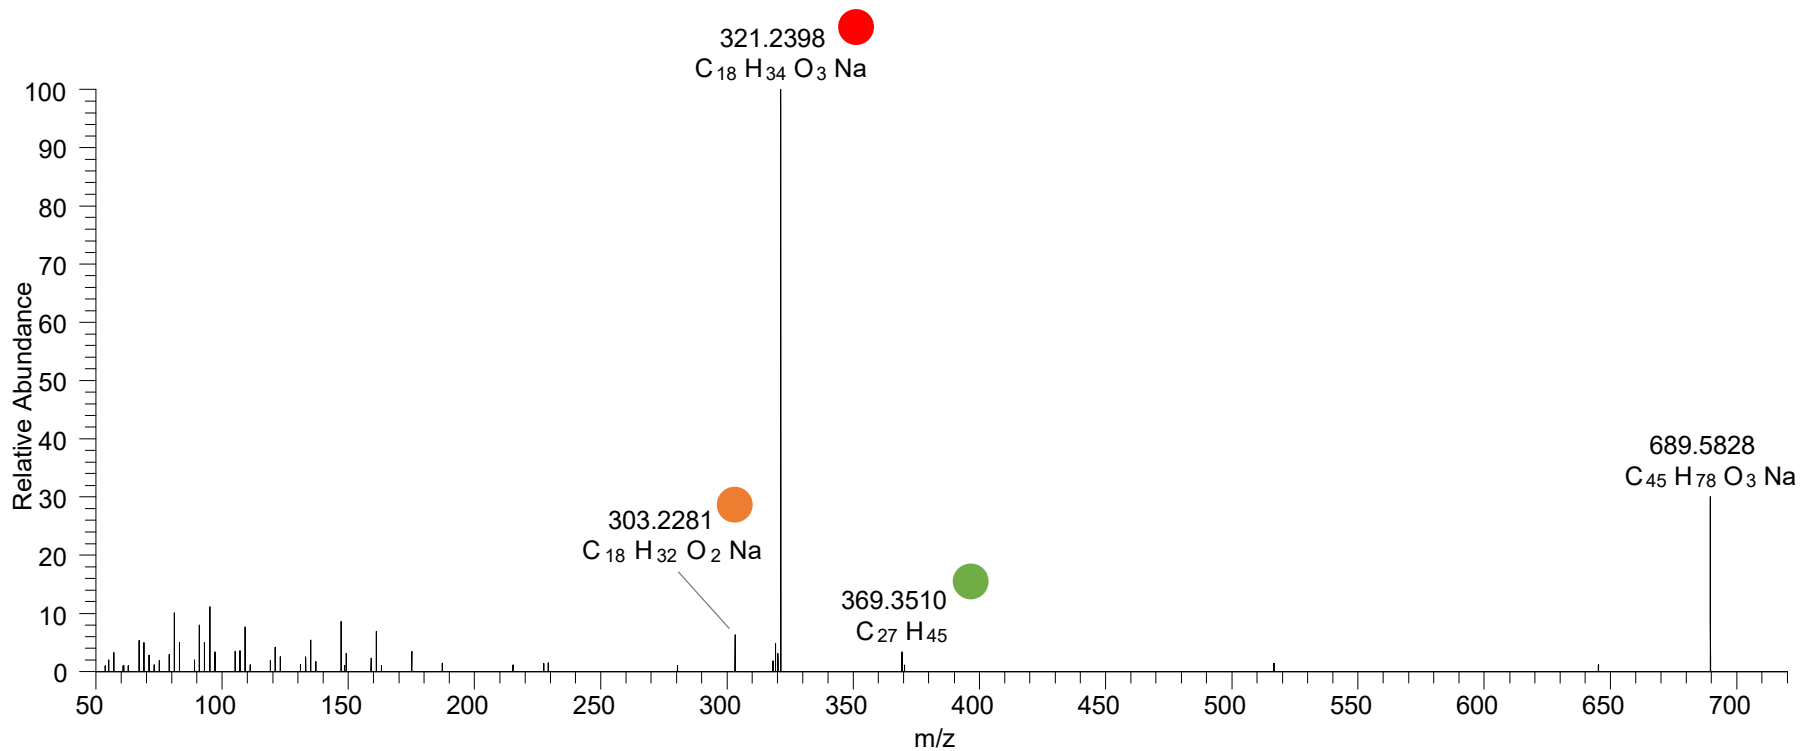

# CE(18:0<ep>) RT 25.9

[oxCE+Na]<sup>+</sup>

XIC 689.5843 NL: 4.79E4

- Fragments containing oxFAs
- Fragments related to water loss
- Fragments not containing oxFAs
- Position-specific fragments
- Fragments related to other oxLPPs

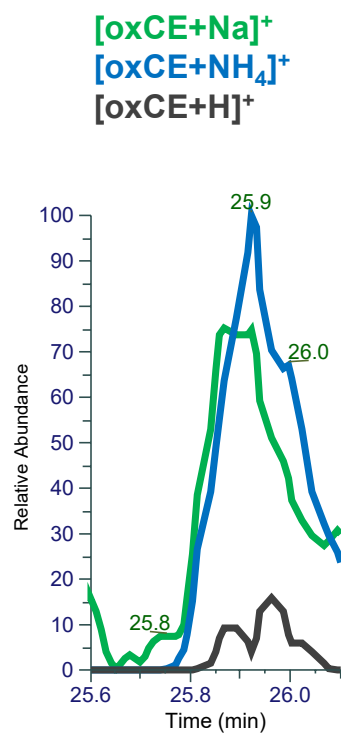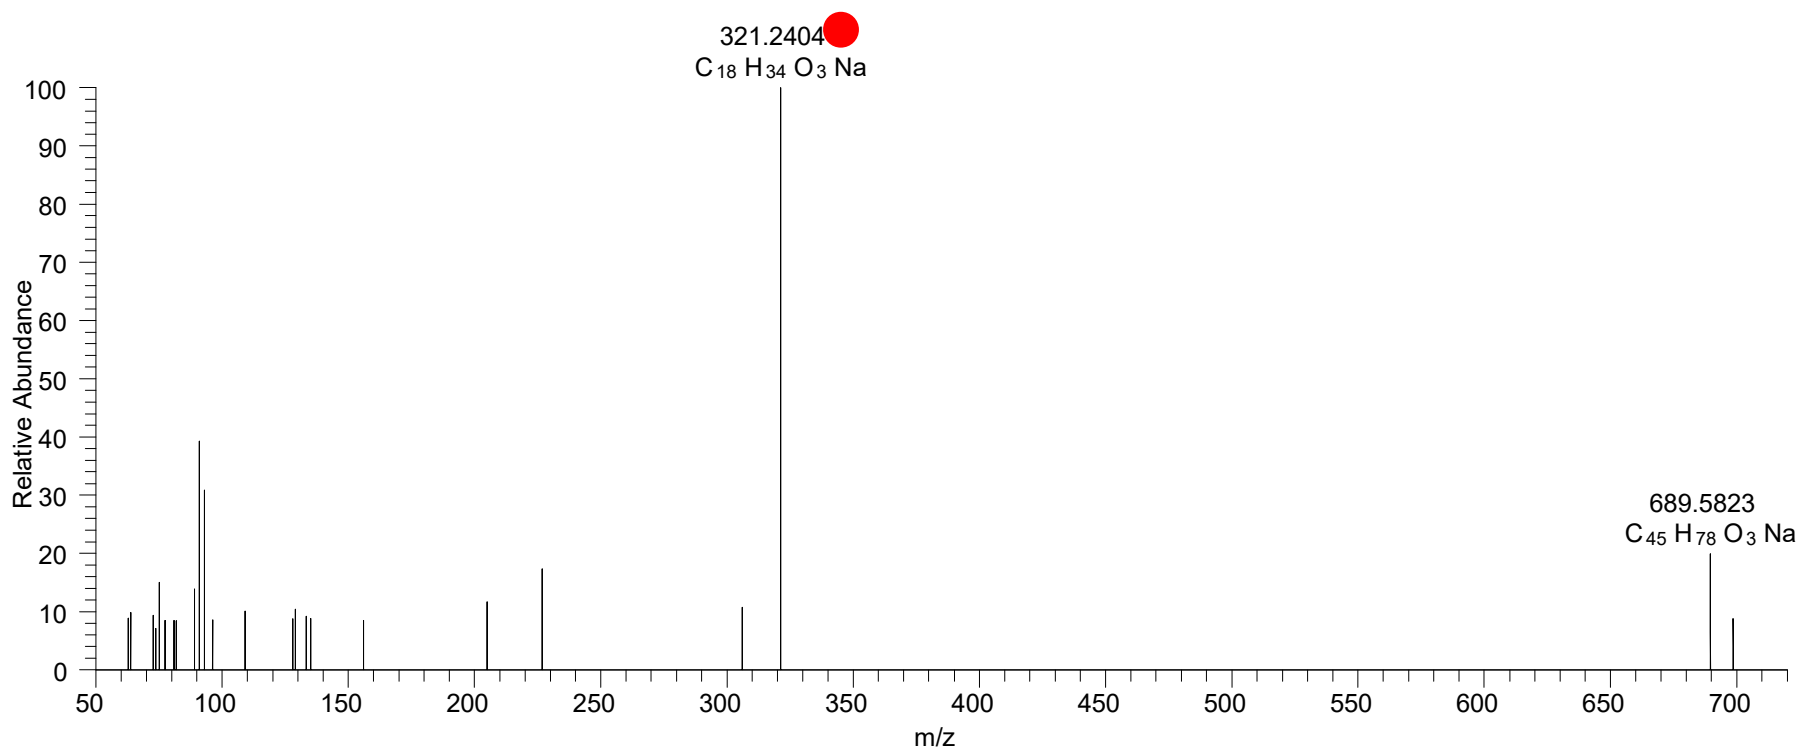

# CE(18:3<2OH>) RT 20.6

[oxCE+Na]<sup>+</sup>

XIC 701.5479 NL: 2.38E5

- Fragments containing oxFAs
- Fragments related to water loss
- Fragments not containing oxFAs
- Position-specific fragments
- Fragments related to other oxLPPs

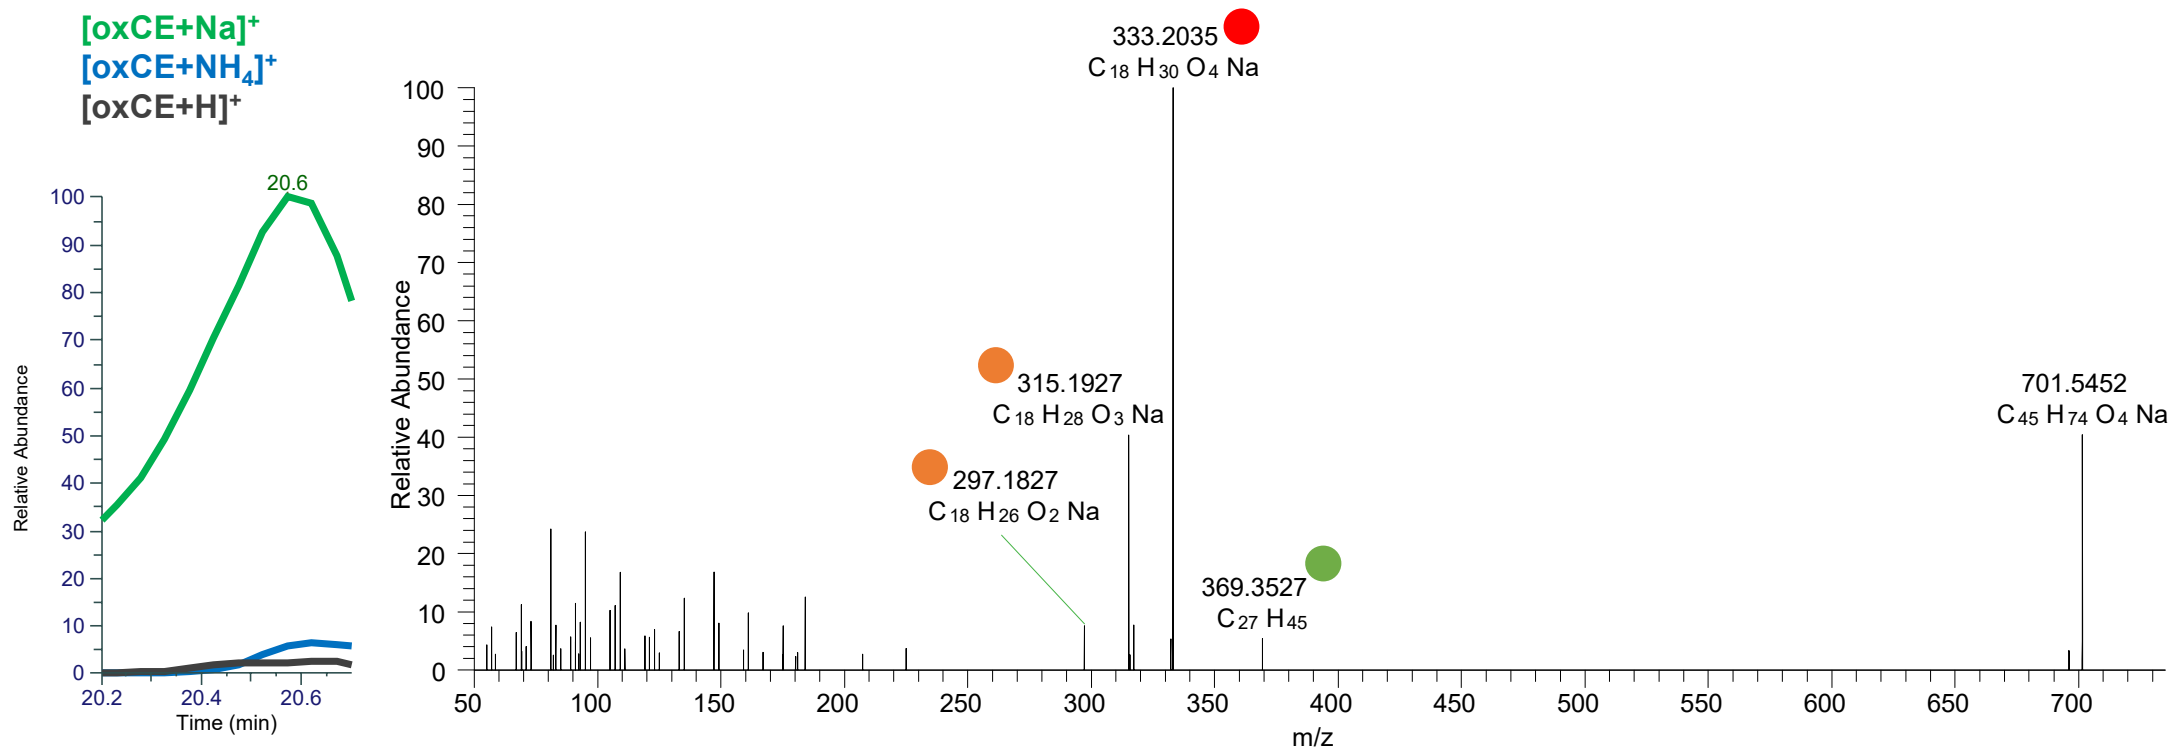

# CE(18:3<OH,O>) RT 21.3

[oxCE+Na]<sup>+</sup>

XIC 701.5479 NL: 4.10E5

- Fragments containing oxFAs
- Fragments related to water loss
- Fragments not containing oxFAs
- Position-specific fragments
- Fragments related to other oxLPPs

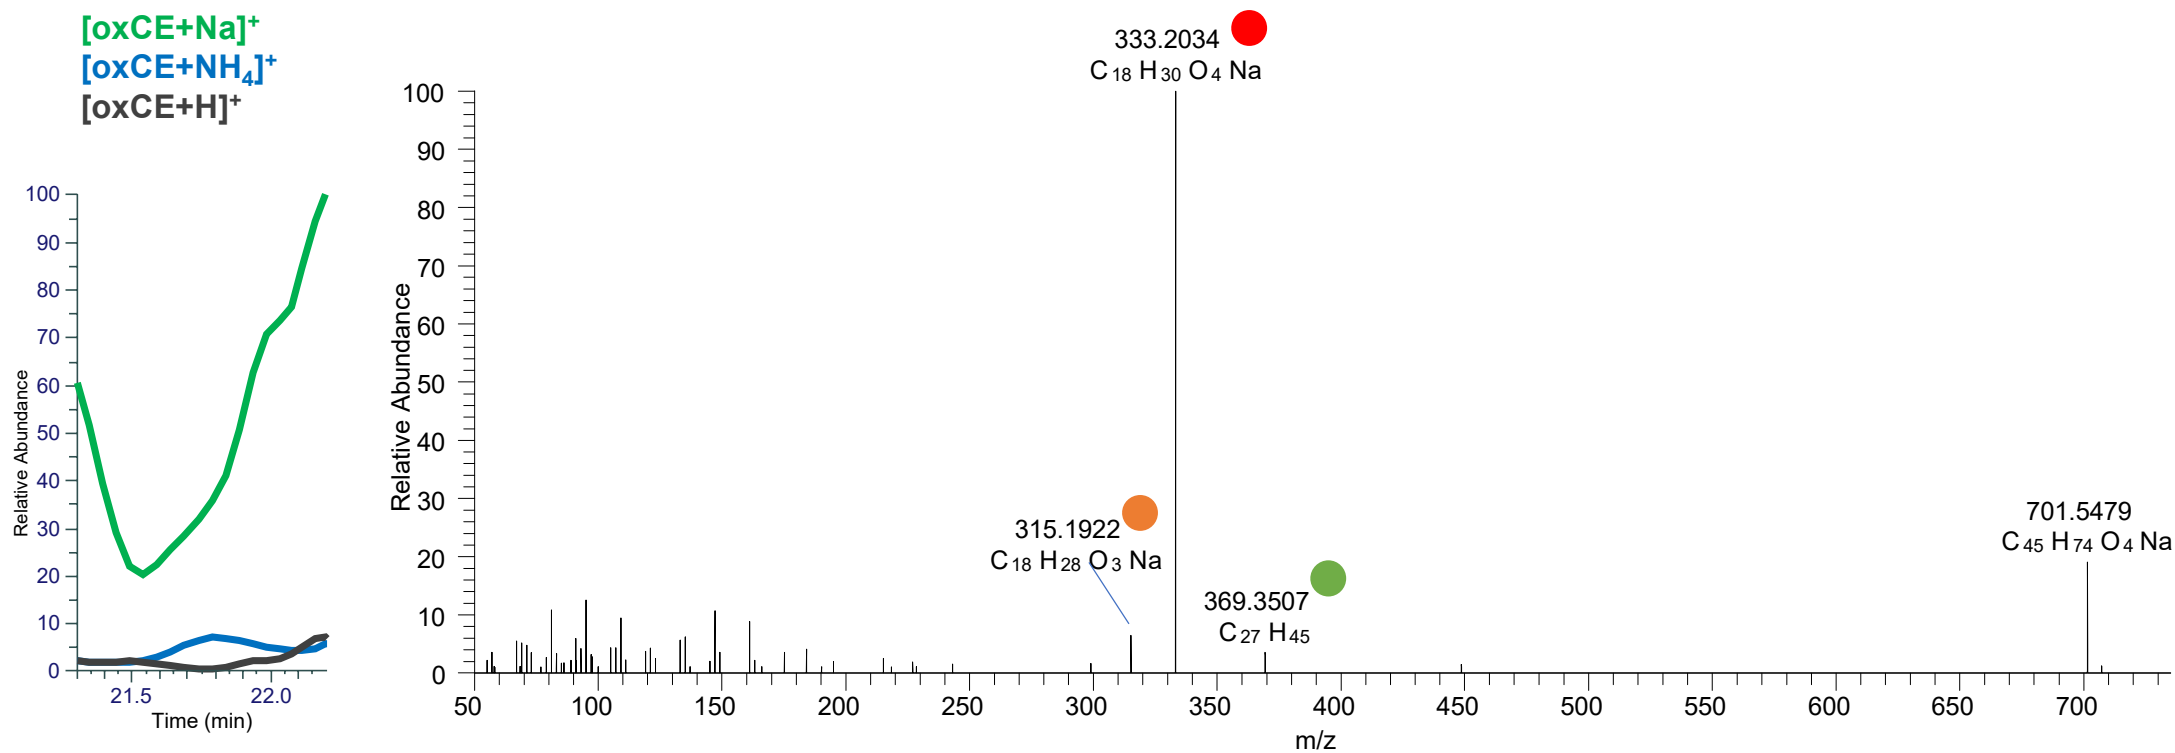

# CE(18:3<OH,O>) RT 22.6

[oxCE+Na]<sup>+</sup>

XIC 701.5479 NL: 8.42E5

- Fragments containing oxFAs
- Fragments related to water loss
- Fragments not containing oxFAs
- Position-specific fragments
- Fragments related to other oxLPPs

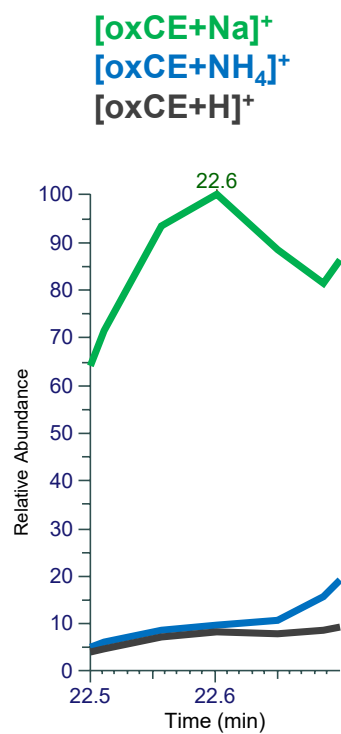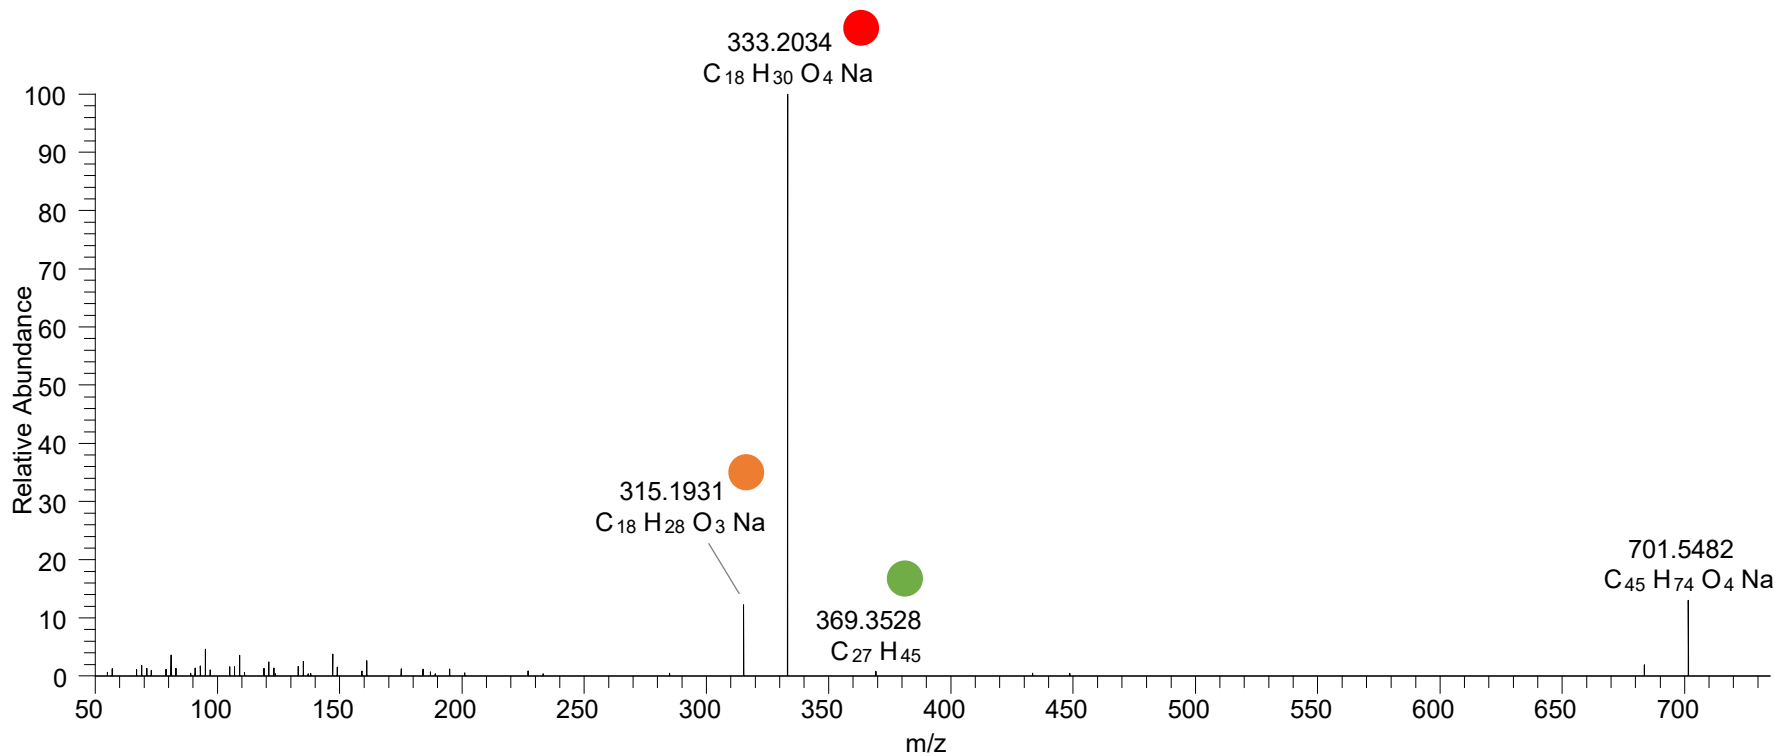



# CE(18:3<20>) RT 22.8

[oxCE+Na]<sup>+</sup>

XIC 701.5479 NL: 9.97E5

- Fragments containing oxFAs
- Fragments related to water loss
- Fragments not containing oxFAs
- Position-specific fragments
- Fragments related to other oxLPPs

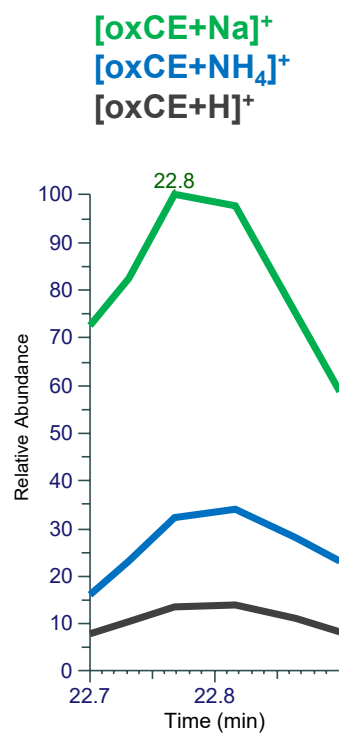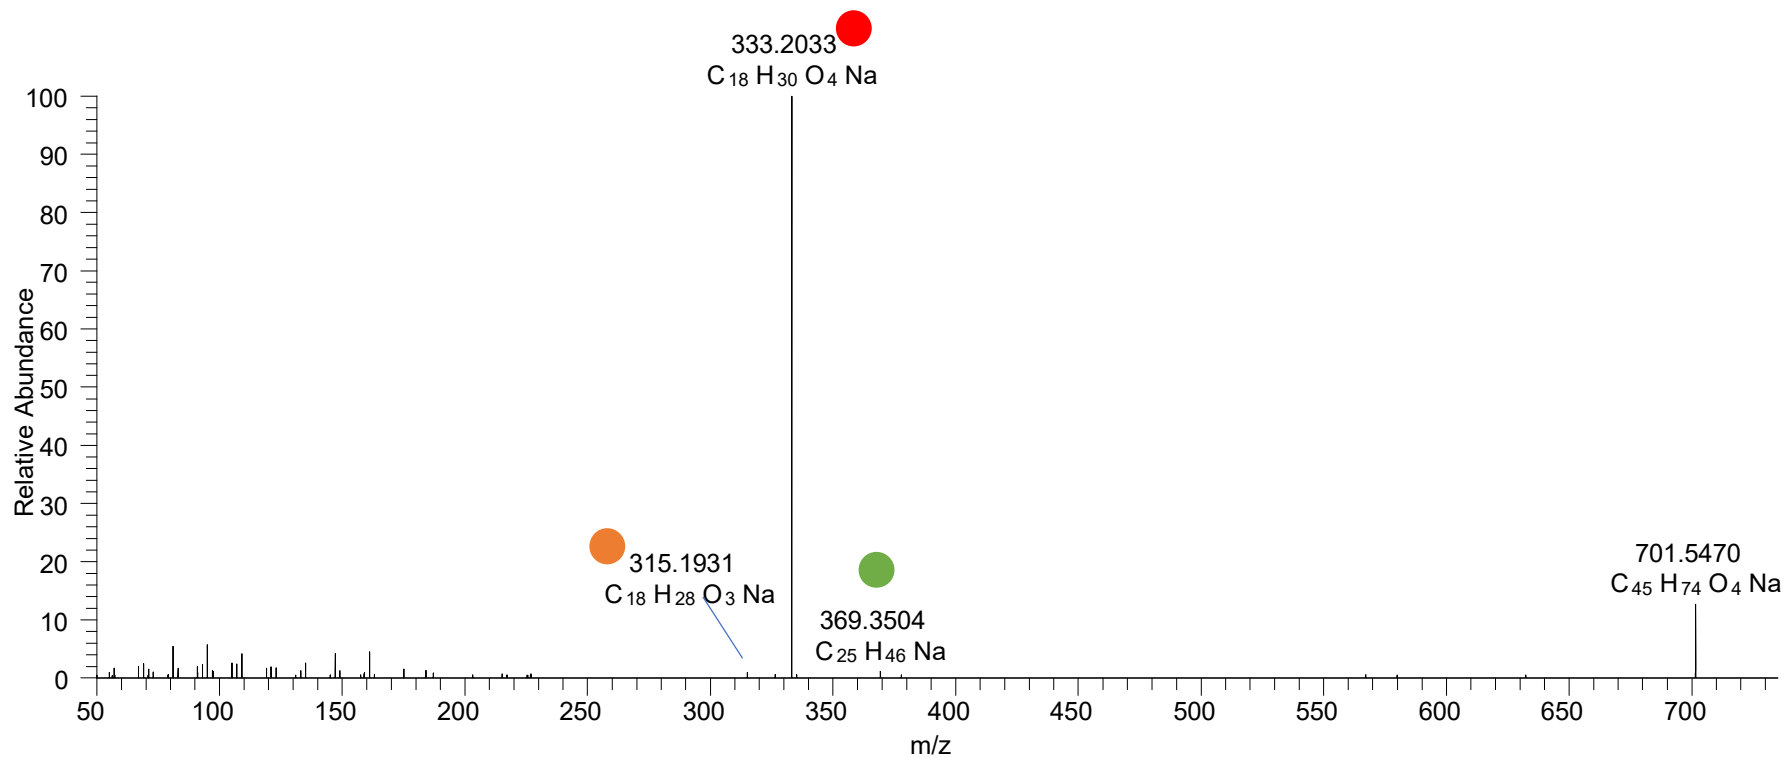

# CE(18:3<OOH{10}>) CE(18:3<OOH{13}>) RT 23.0-23.2

[oxCE+Na]<sup>+</sup>

XIC 701.5479 NL: 1.11E6

● Fragments containing oxFAs

● Fragments related to water loss

● Fragments not containing oxFAs

● Position-specific fragments

● Fragments related to other oxLPPs

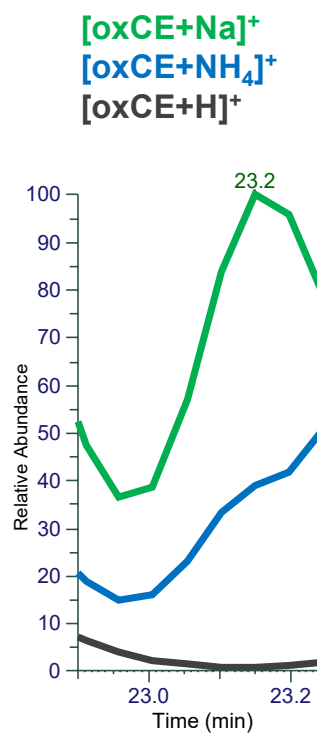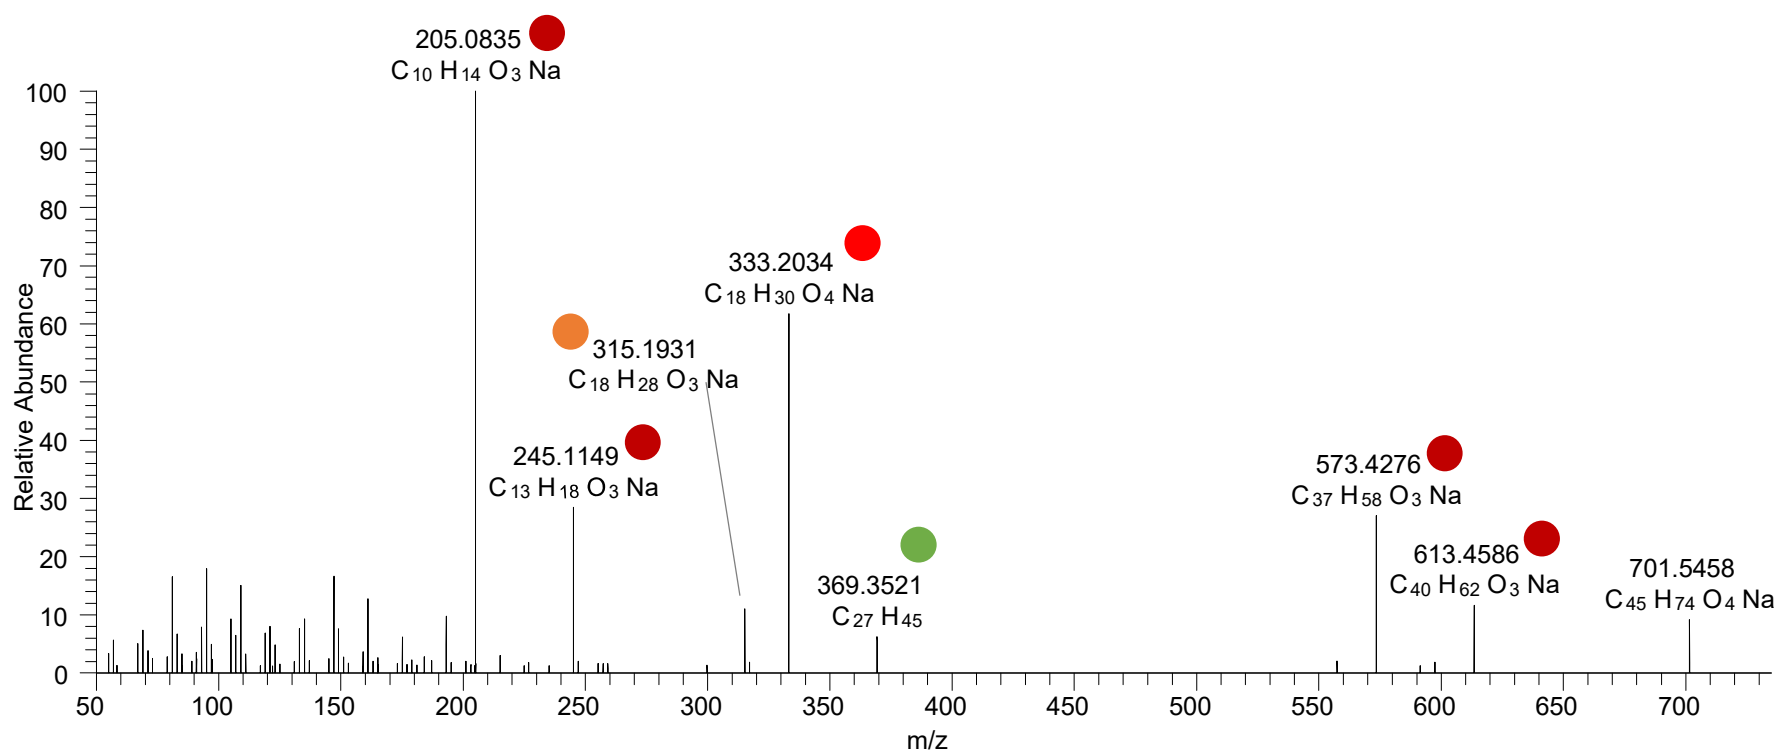

CE(18:3<OOH{13}>)  
CE(18:3<OOH{16}>)  
RT 23.3

[oxCE+Na]<sup>+</sup>

XIC 701.5479 NL: 6.80E5

- Fragments containing oxFAs
- Fragments related to water loss
- Fragments not containing oxFAs
- Position-specific fragments
- Fragments related to other oxLPPs

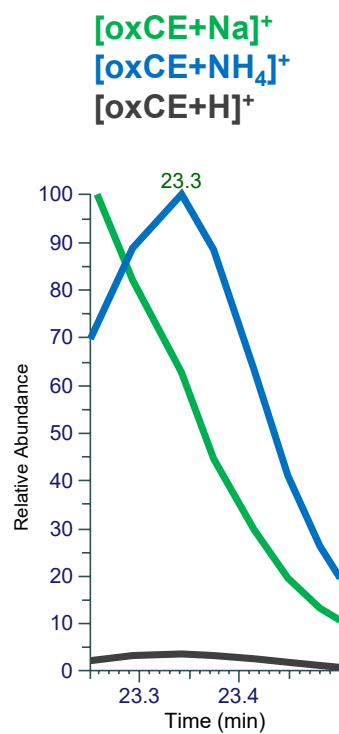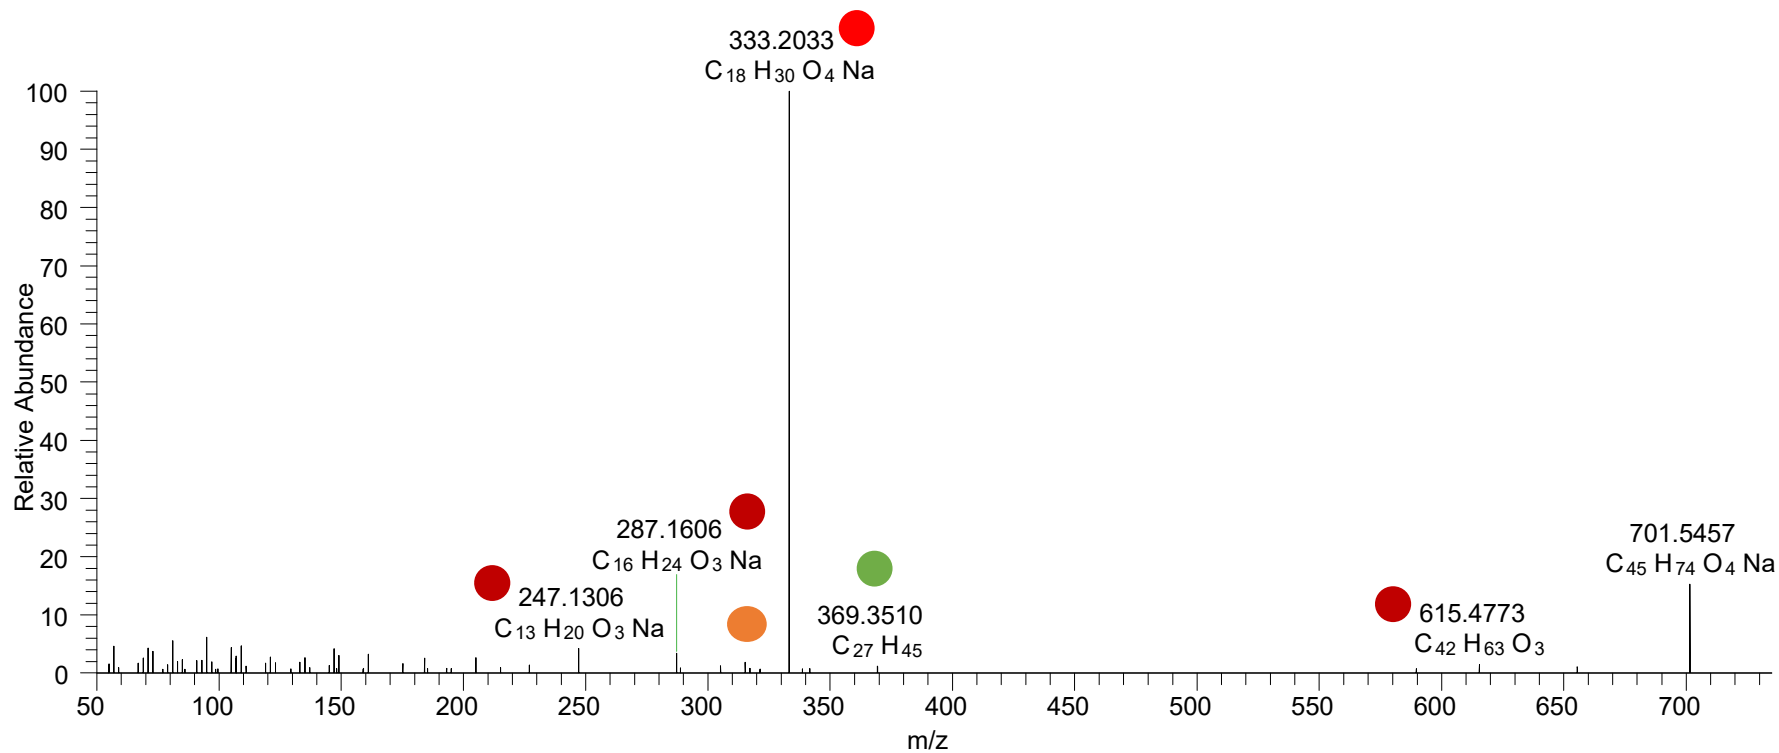

# CE(18:2<2OH>) RT 21.1

[oxCE+Na]<sup>+</sup>

XIC 703.5636 NL: 2.03E5

- Fragments containing oxFAs
- Fragments related to water loss
- Fragments not containing oxFAs
- Position-specific fragments
- Fragments related to other oxLPPs

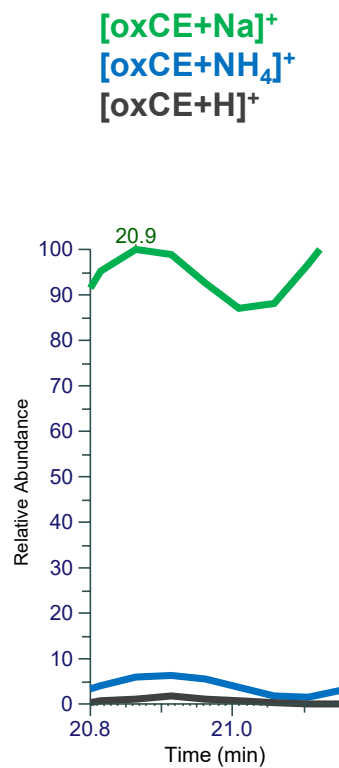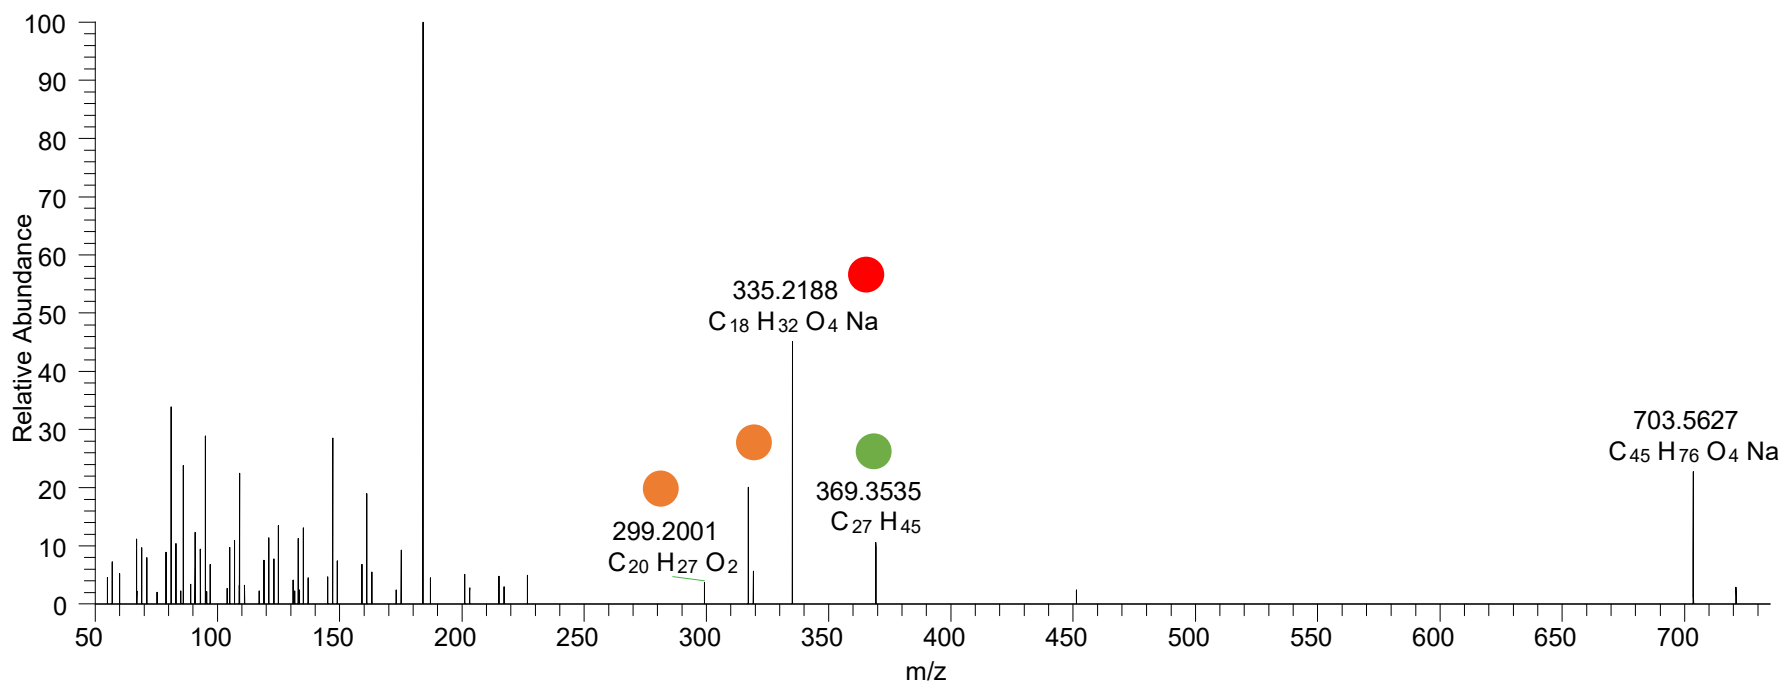

# CE(18:2<OH,O>) RT 21.6

[oxCE+Na]<sup>+</sup>

XIC 703.5636 NL: 2.02E5

- Fragments containing oxFAs
- Fragments related to water loss
- Fragments not containing oxFAs
- Position-specific fragments
- Fragments related to other oxLPPs

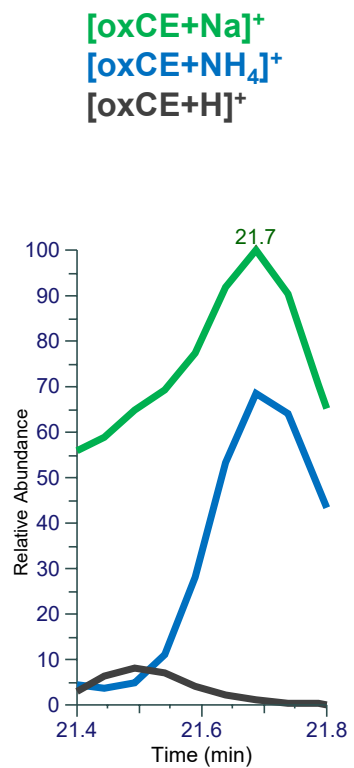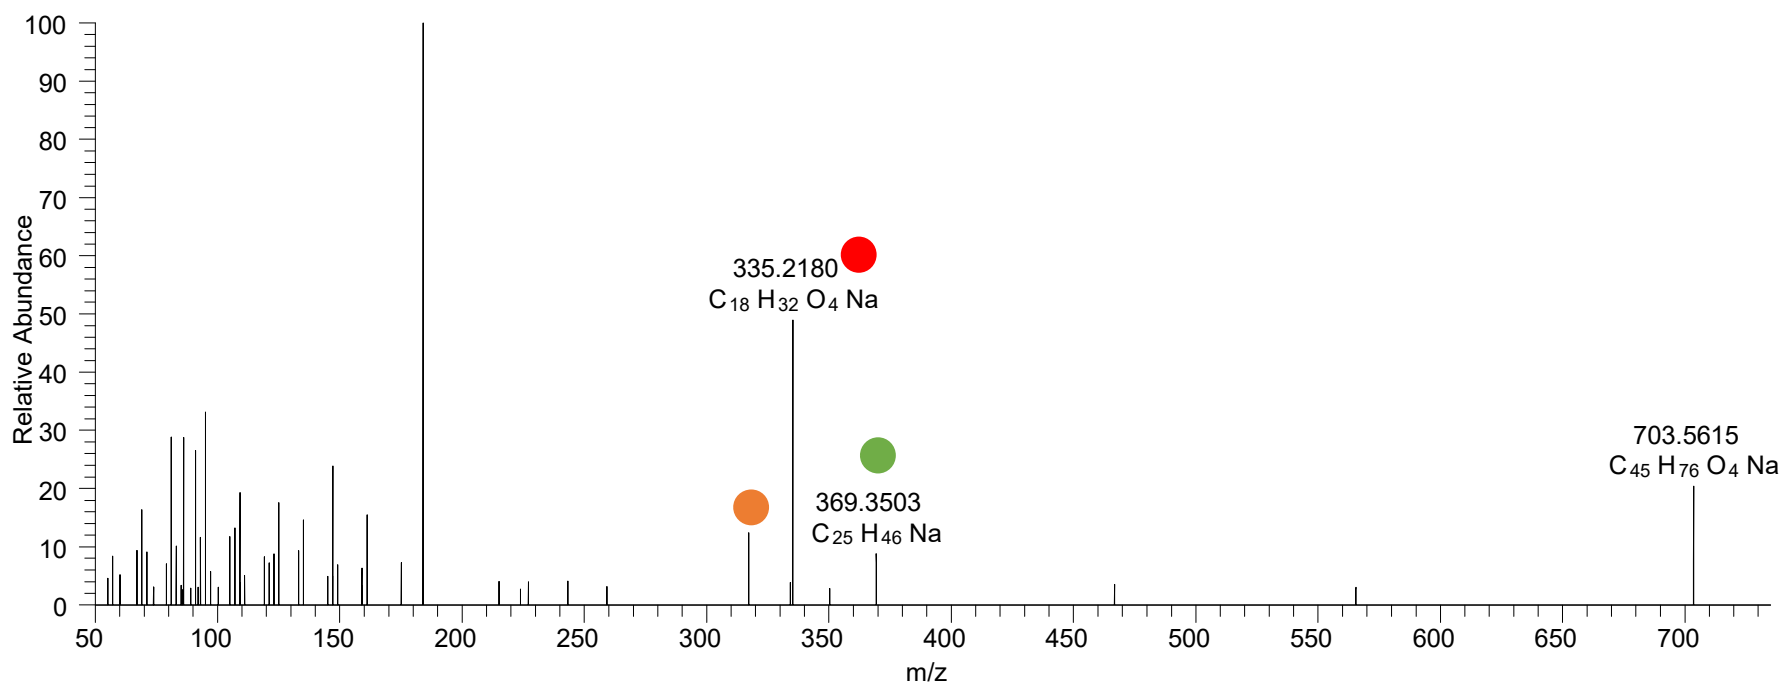

# CE(18:2<OH{9},O{10}>) RT 22.3

[oxCE+Na]<sup>+</sup>

XIC 703.5636 NL: 2.28E6

- Fragments containing oxFAs
- Fragments related to water loss
- Fragments not containing oxFAs
- Position-specific fragments
- Fragments related to other oxLPPs

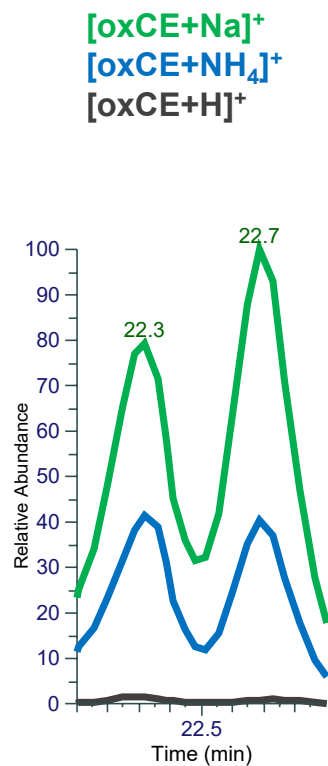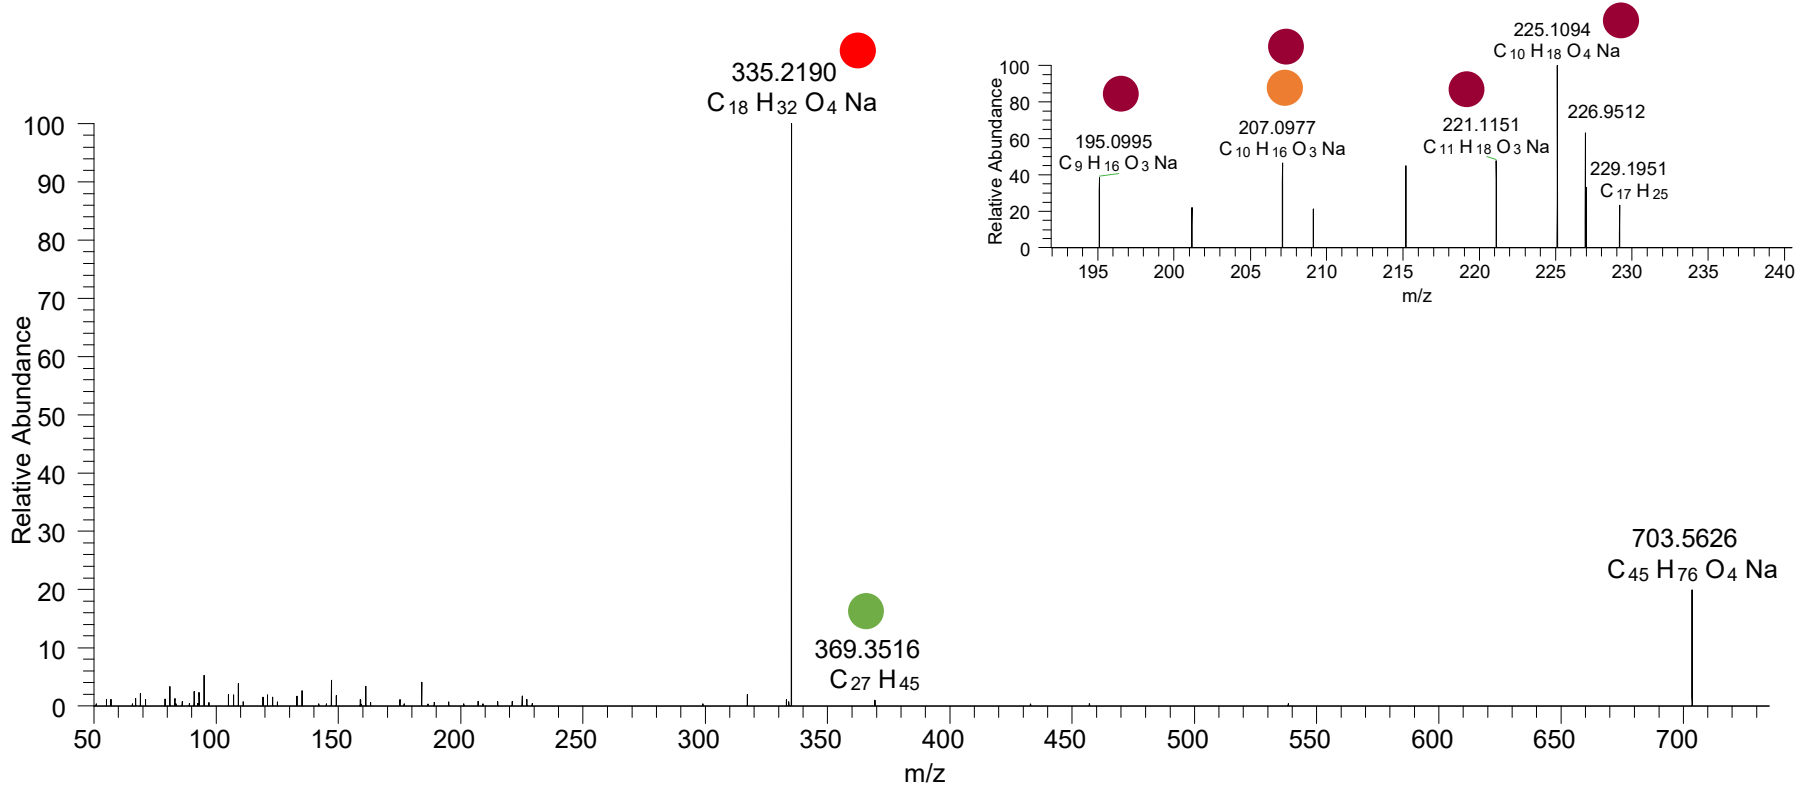

CE(18:2<OOH{10}>)  
 CE(18:2<OOH{11}>)  
 CE(18:2<OOH{13}>)  
 CE(18:2<OOH{15}>)  
 RT 23.3

[oxCE+Na]<sup>+</sup>

XIC 703.5636 NL: 3.61E6

● Fragments containing oxFAs

● Fragments related to water loss

● Fragments not containing oxFAs

● Position-specific fragments

● Fragments related to other oxLPPs

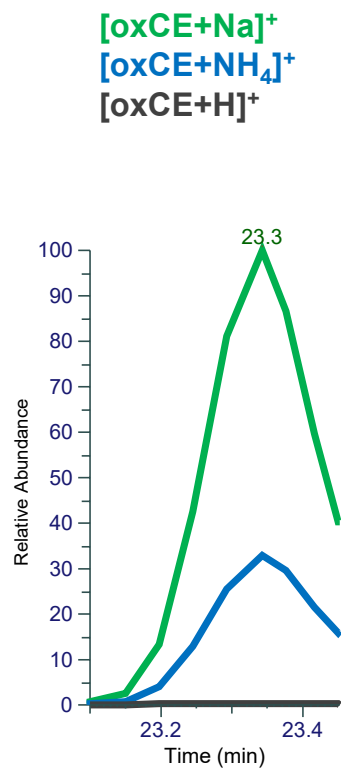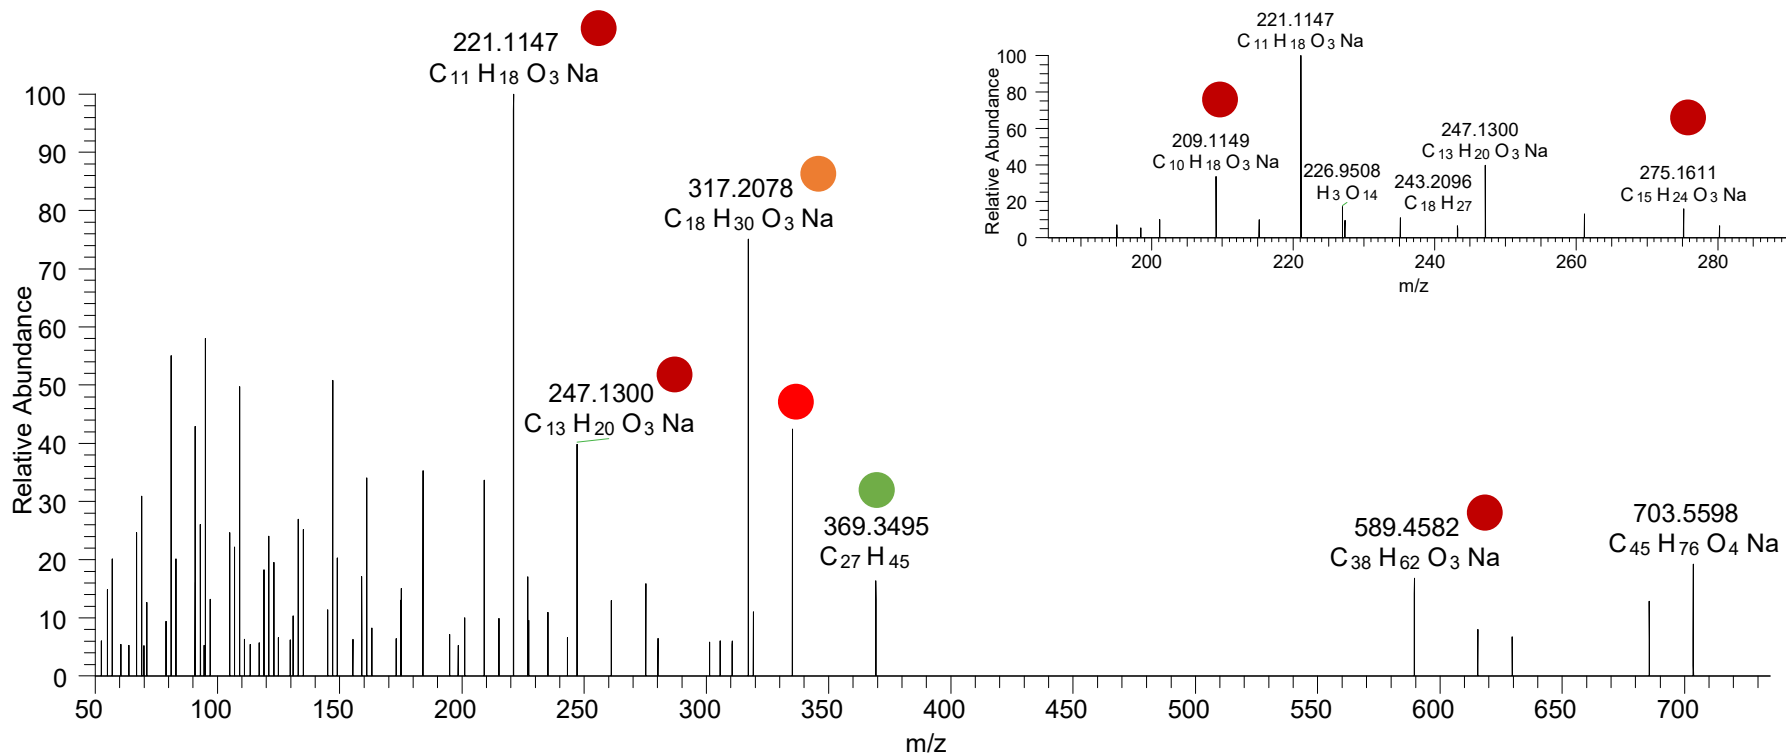

# CE(18:2<OOH{9}>) CE(18:2<OOH{13}>) RT 23.6

[oxCE+Na]<sup>+</sup>

XIC 703.5636 NL: 1.35E7

- Fragments containing oxFAs
- Fragments related to water loss
- Fragments not containing oxFAs
- Position-specific fragments
- Fragments related to other oxLPPs

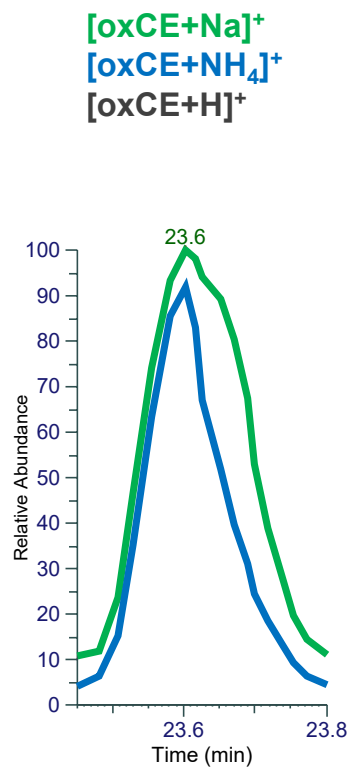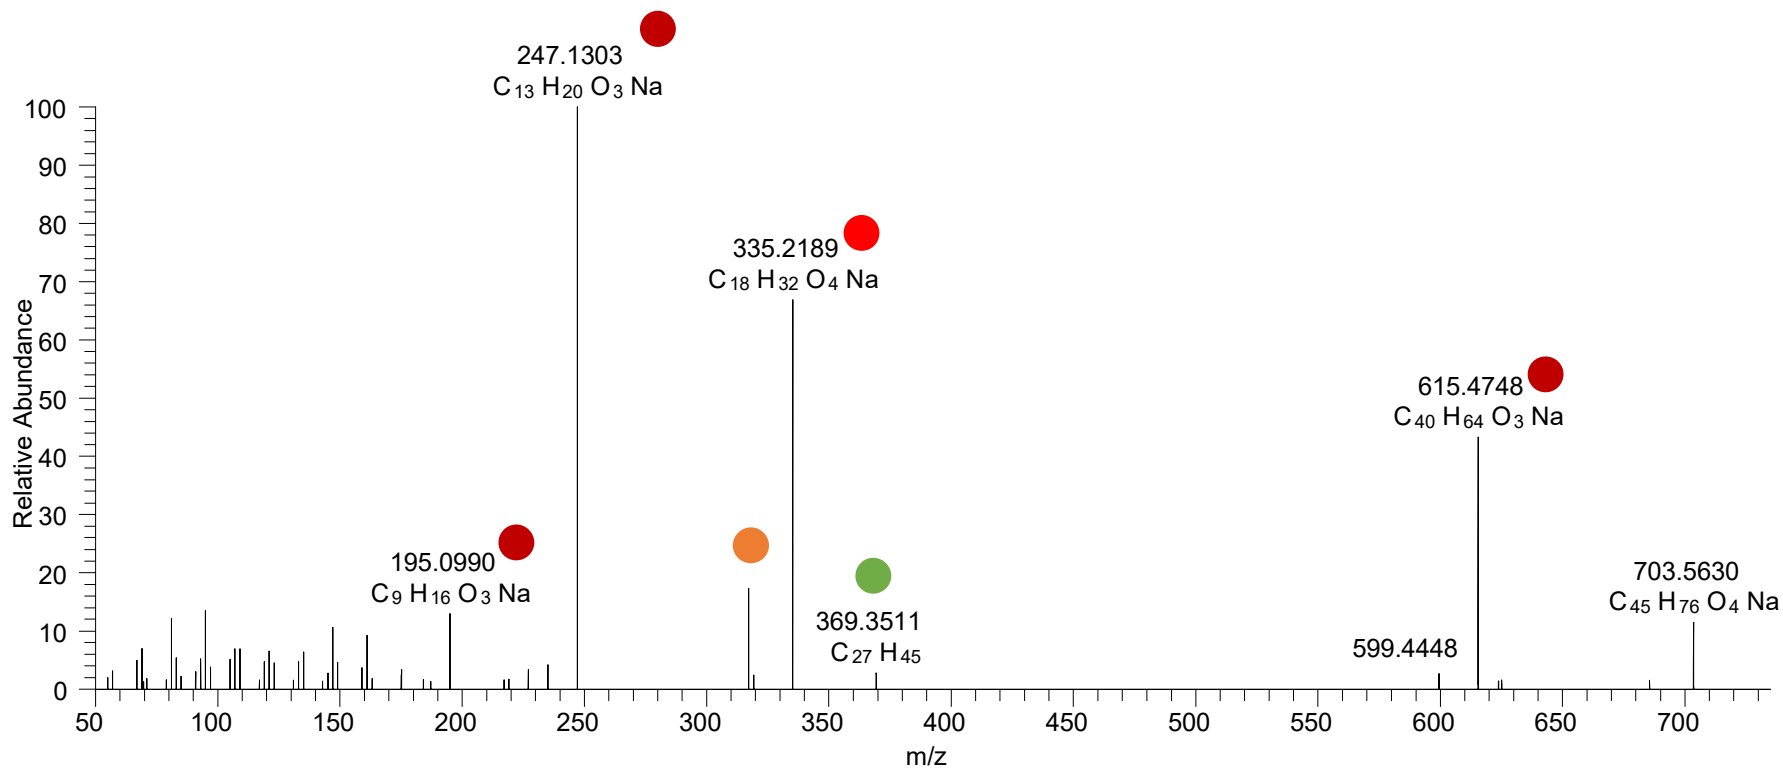



# CE(18:0<ep,O>) RT 23.2

[oxCE+Na]<sup>+</sup>

XIC 705.5792 NL: 7.39E3

- Fragments containing oxFAs
- Fragments related to water loss
- Fragments not containing oxFAs
- Position-specific fragments
- Fragments related to other oxLPPs

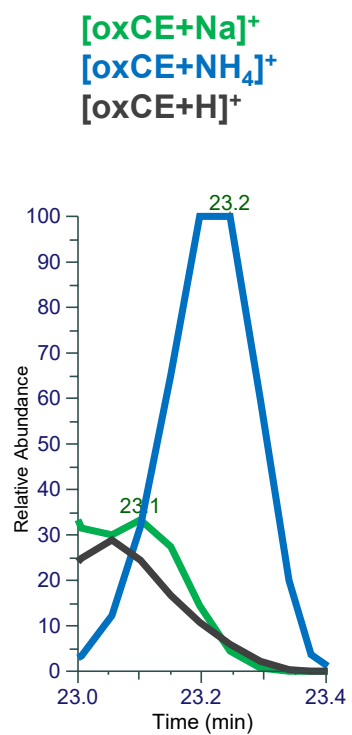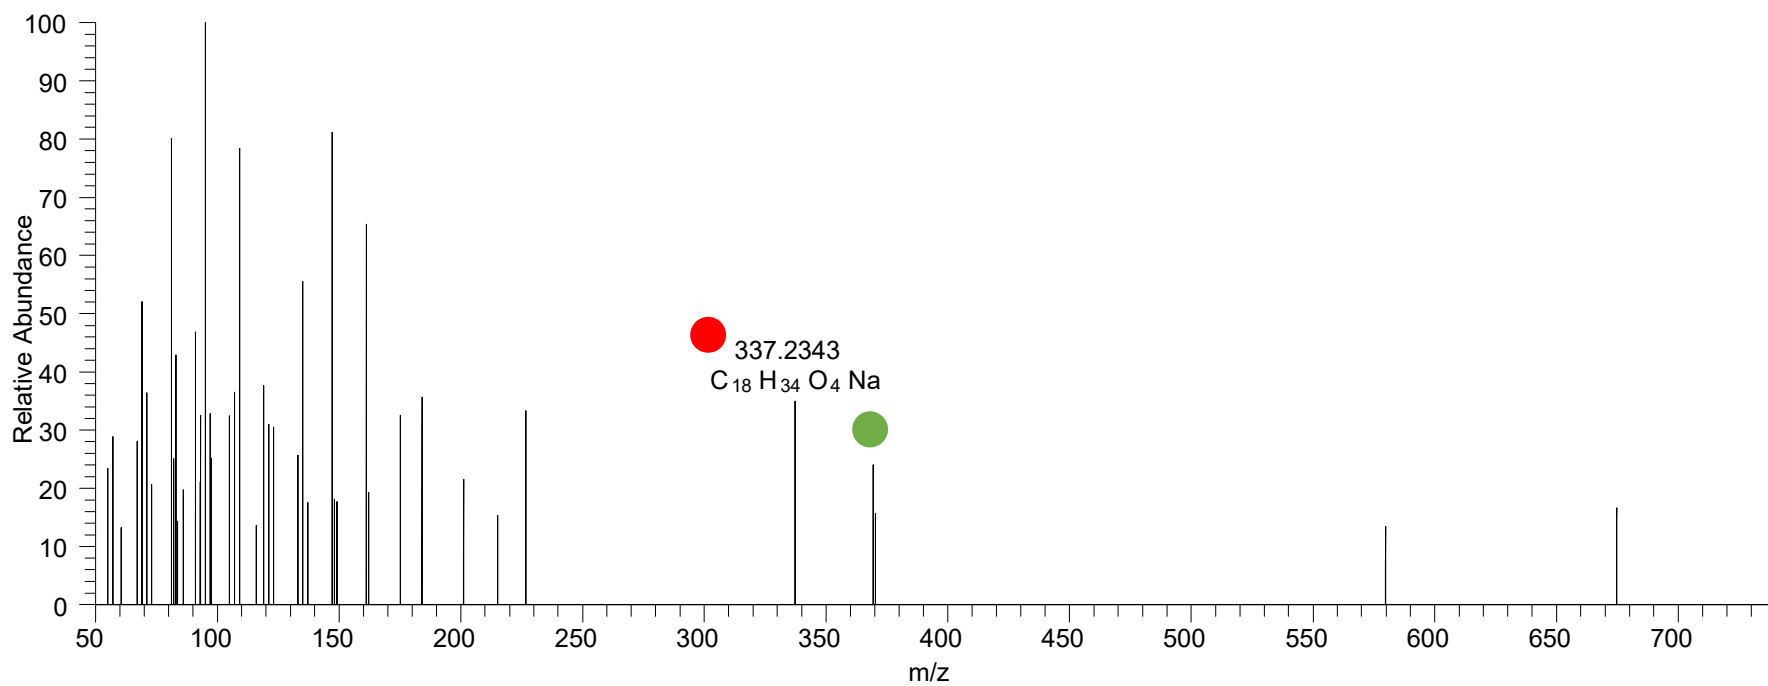

# CE(18:1<OOH{11}>) CE(18:1<OOH{13}>) RT 24.0

[oxCE+Na]<sup>+</sup>

XIC 705.5792 NL: 4.64E5

- Fragments containing oxFAs
- Fragments related to water loss
- Fragments not containing oxFAs
- Position-specific fragments
- Fragments related to other oxLPPs

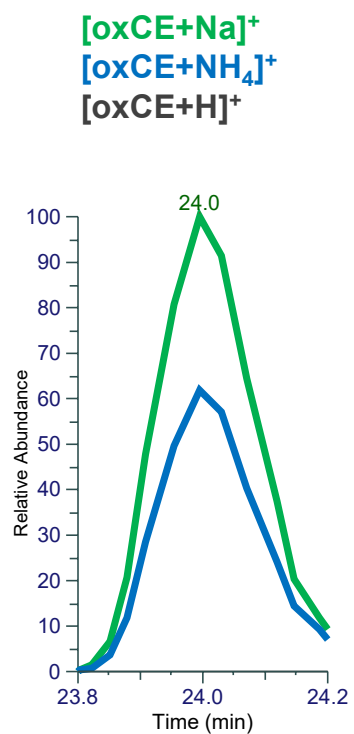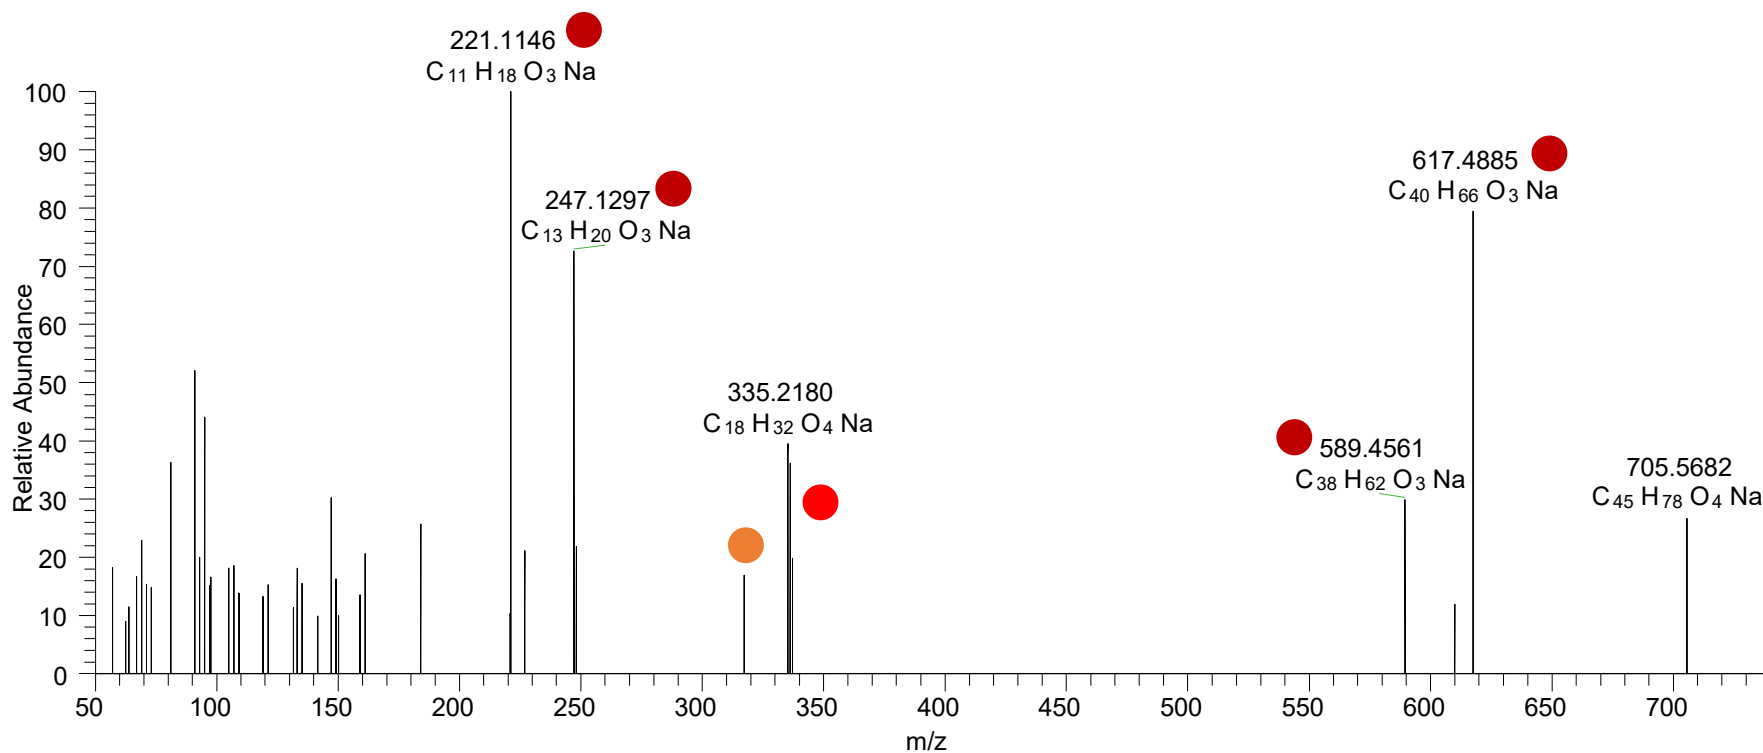

# CE(18:1<OOH{10}>) CE(18:1<OOH{12}>) RT 24.1

[oxCE+Na]<sup>+</sup>

XIC 705.5792 NL: 4.64E5

- Fragments containing oxFAs
- Fragments related to water loss
- Fragments not containing oxFAs
- Position-specific fragments
- Fragments related to other oxLPPs

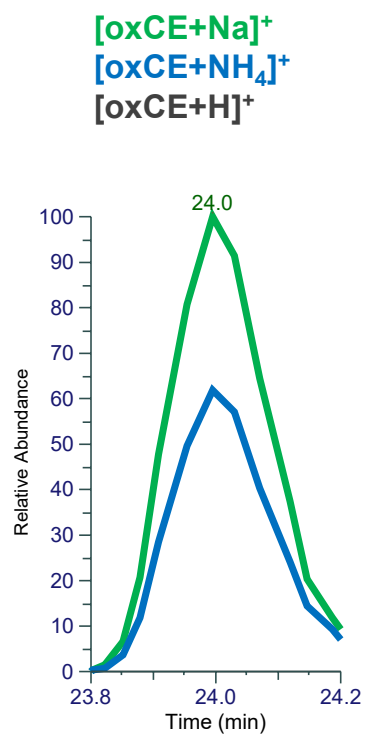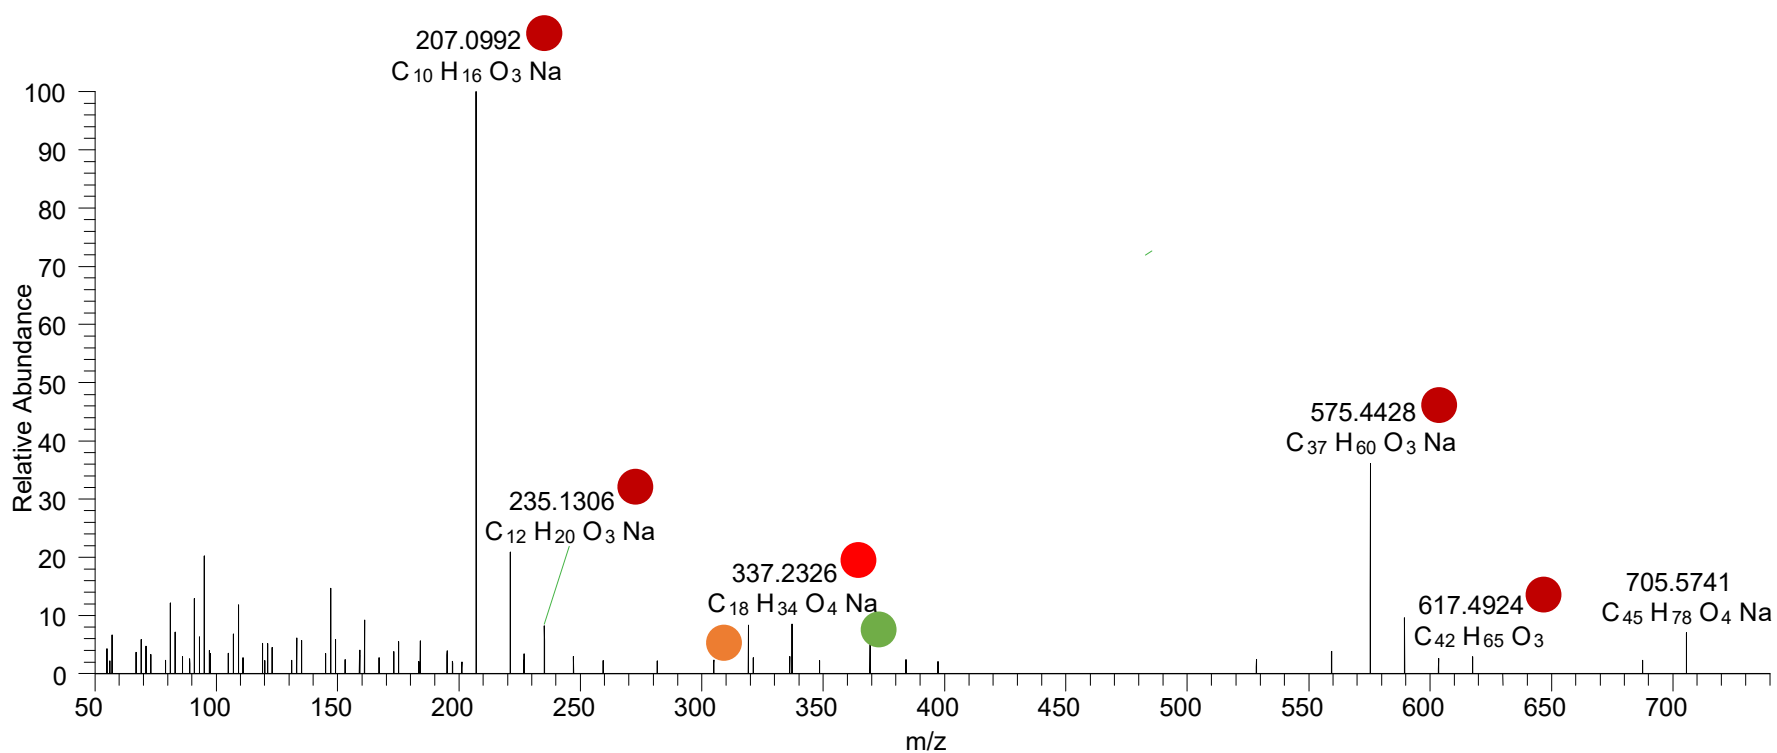

# CE(20:5<OH>) RT 23.1

[oxCE+Na]<sup>+</sup>

XIC 709.5530 NL: 1.44E6

- Fragments containing oxFAs
- Fragments related to water loss
- Fragments not containing oxFAs
- Position-specific fragments
- Fragments related to other oxLPPs

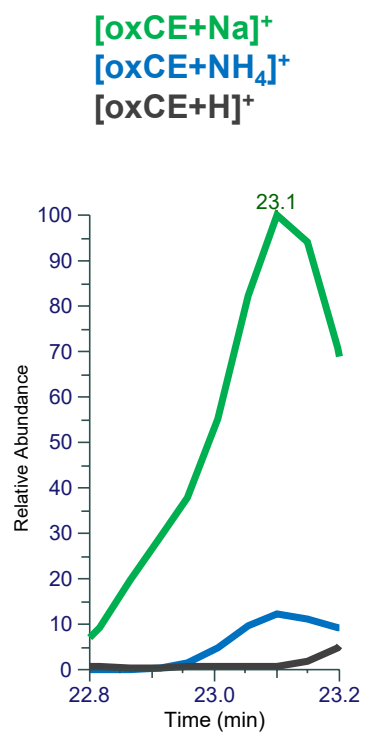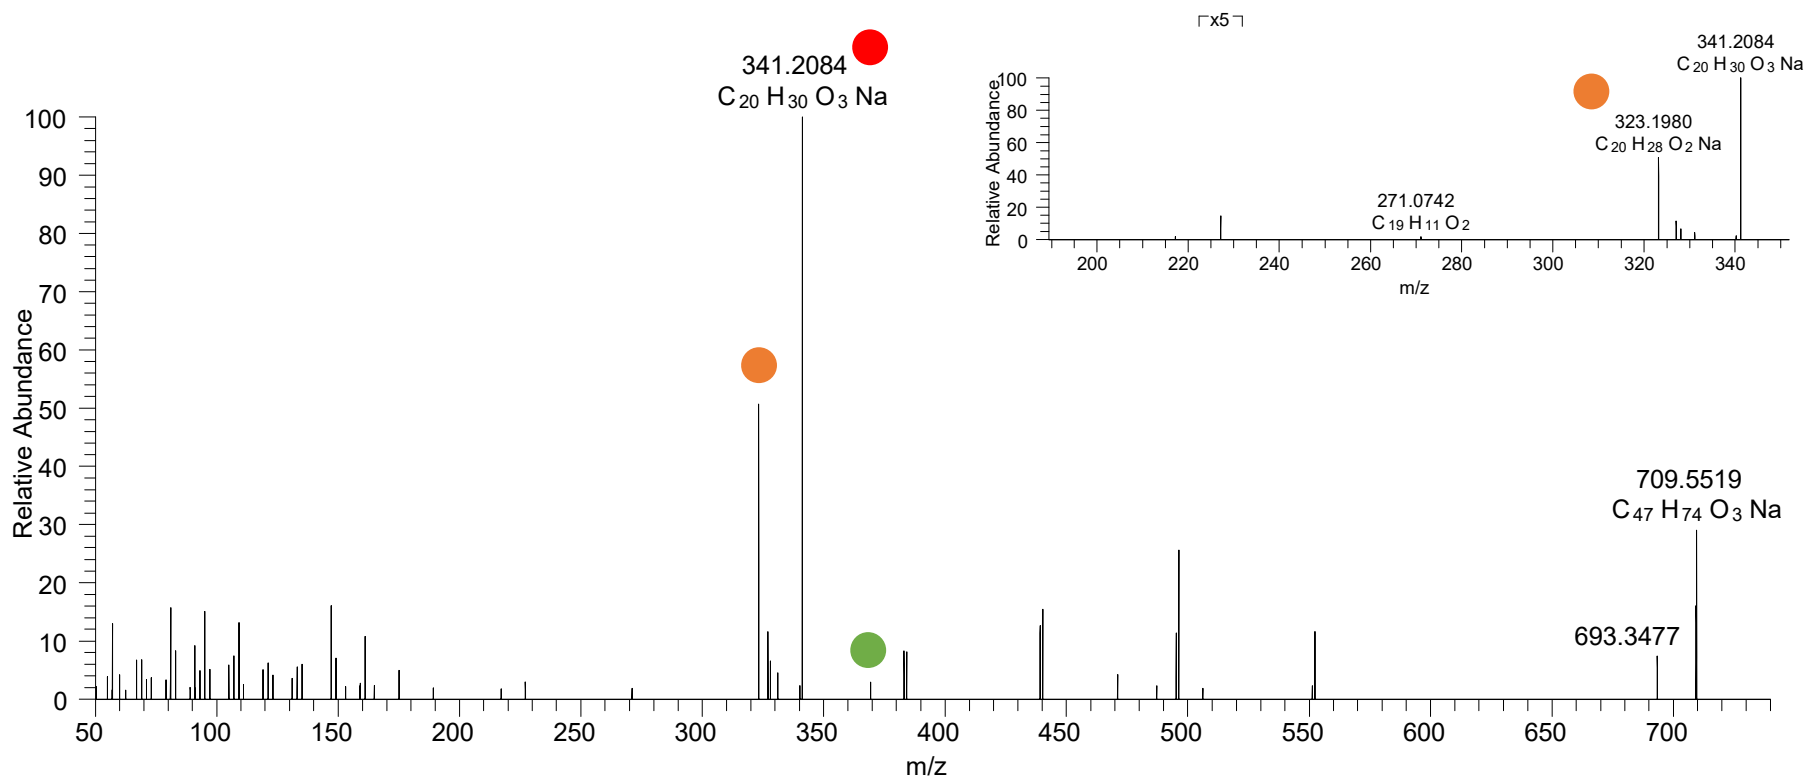

# CE(20:4<OH{9}>) RT 23.6

[oxCE+Na]<sup>+</sup>

XIC 711.5687 NL: 2.94E6

- Fragments containing oxFAs
- Fragments related to water loss
- Fragments not containing oxFAs
- Position-specific fragments
- Fragments related to other oxLPPs

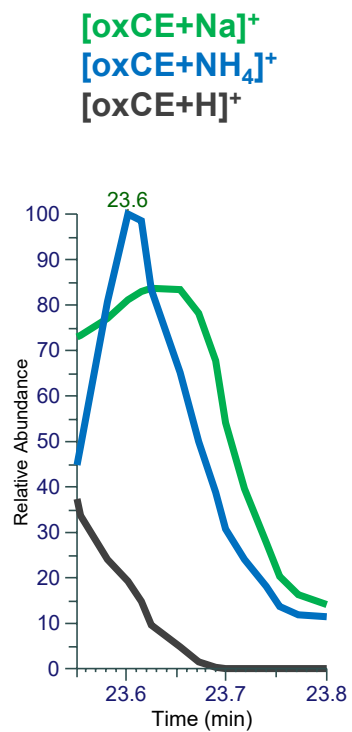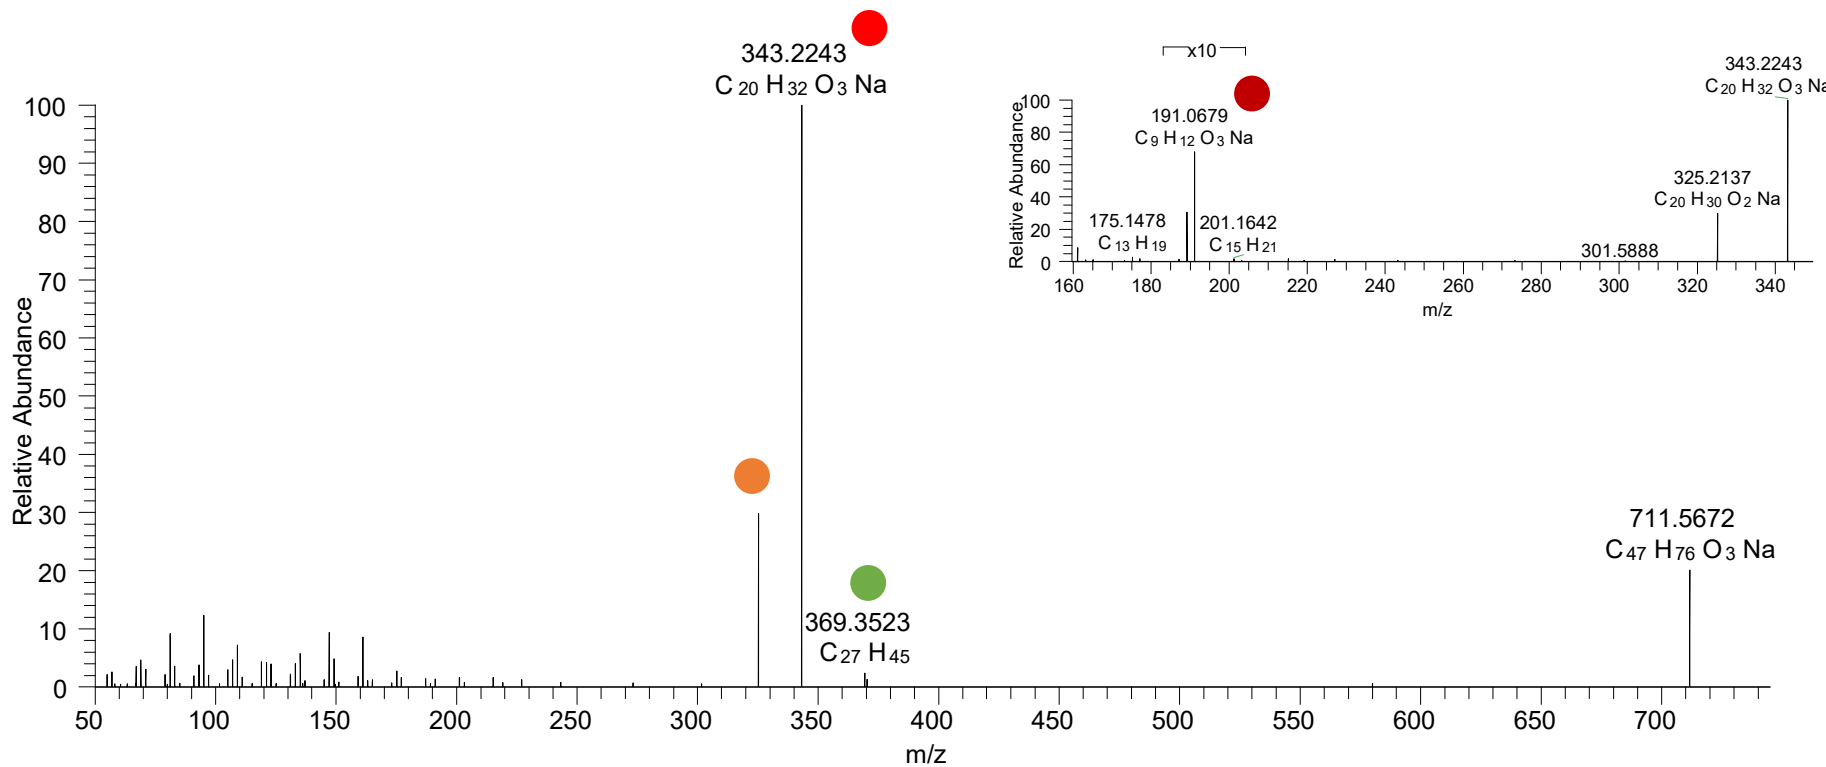

# CE(20:3<oxo>) RT 24.6

[oxCE+Na]<sup>+</sup>

XIC 711.5687 NL: 9.11E4

- Fragments containing oxFAs
- Fragments related to water loss
- Fragments not containing oxFAs
- Position-specific fragments
- Fragments related to other oxLPPs

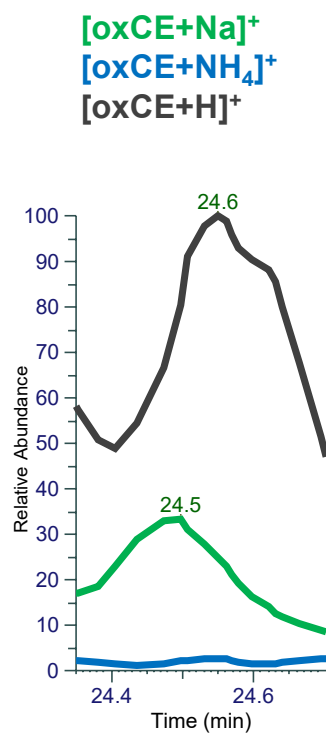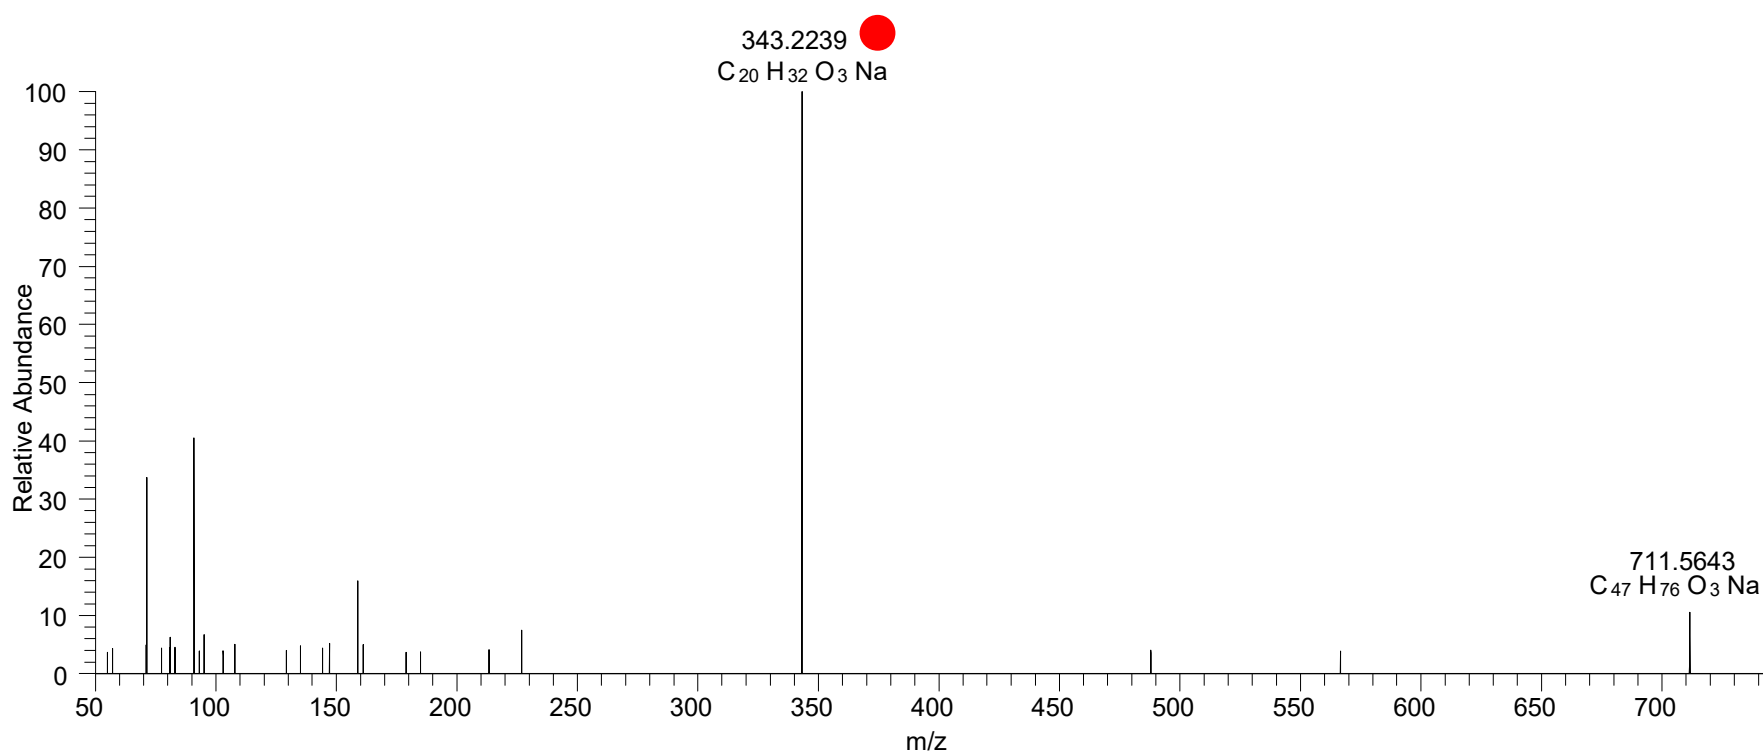

# CE(20:3<OH>) RT 24.0

[oxCE+Na]<sup>+</sup>

XIC 713.5849 NL: 1.67E6

- Fragments containing oxFAs
- Fragments related to water loss
- Fragments not containing oxFAs
- Position-specific fragments
- Fragments related to other oxLPPs

[oxCE+Na]<sup>+</sup>  
[oxCE+NH<sub>4</sub>]<sup>+</sup>  
[oxCE+H]<sup>+</sup>

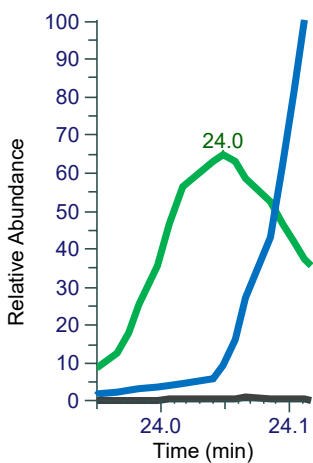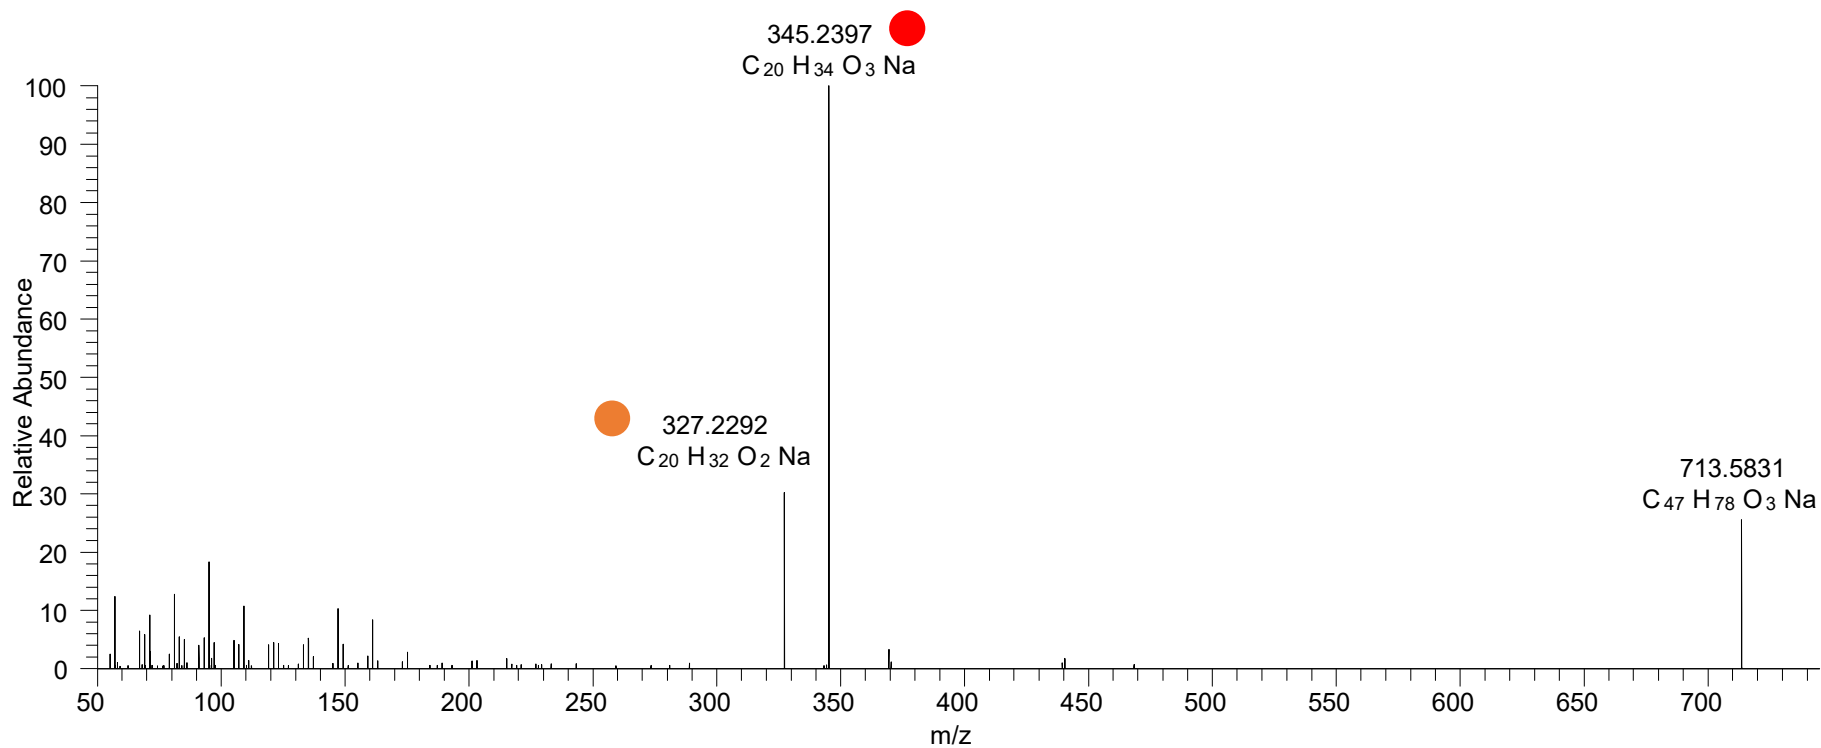

# CE(18:3<2OH,O>) RT 20.2

[oxCE+Na]<sup>+</sup>

XIC 717.5428 NL: 1.36E5

- Fragments containing oxFAs
- Fragments related to water loss
- Fragments not containing oxFAs
- Position-specific fragments
- Fragments related to other oxLPPs

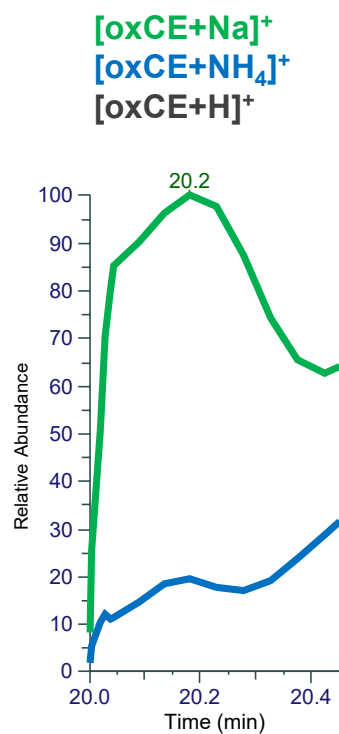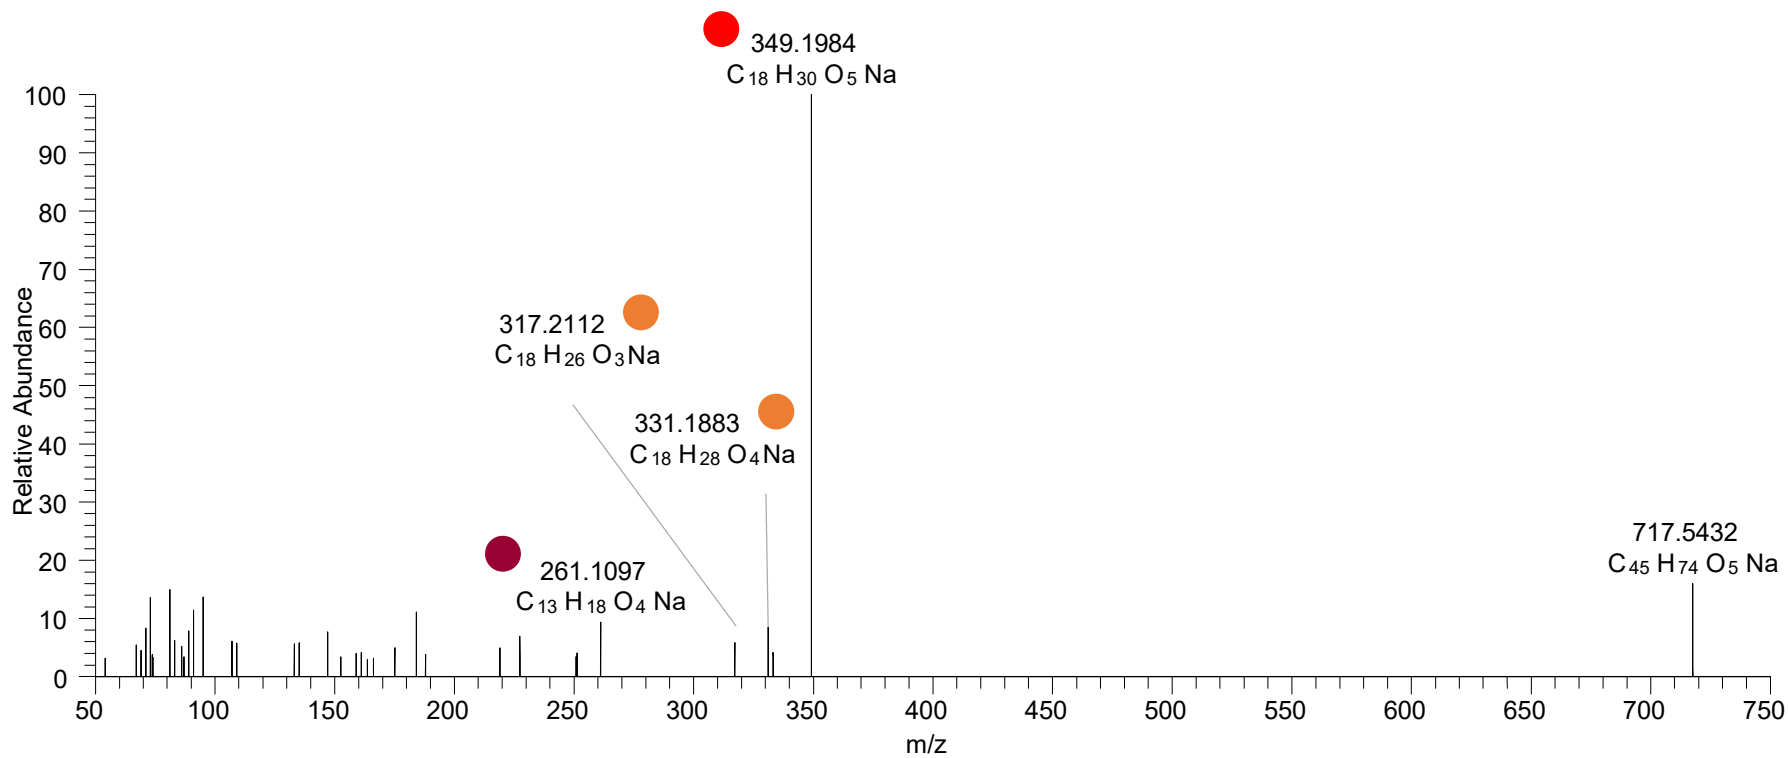



# CE(18:3<3O>) RT 20.7

[oxCE+Na]<sup>+</sup>

XIC 717.5428 NL: 1.03E5

- Fragments containing oxFAs
- Fragments related to water loss
- Fragments not containing oxFAs
- Position-specific fragments
- Fragments related to other oxLPPs

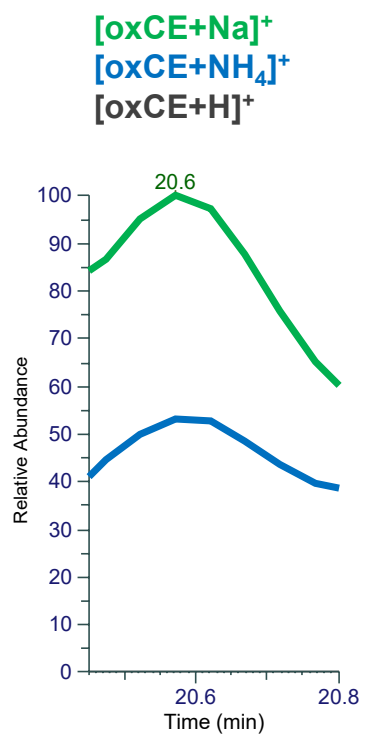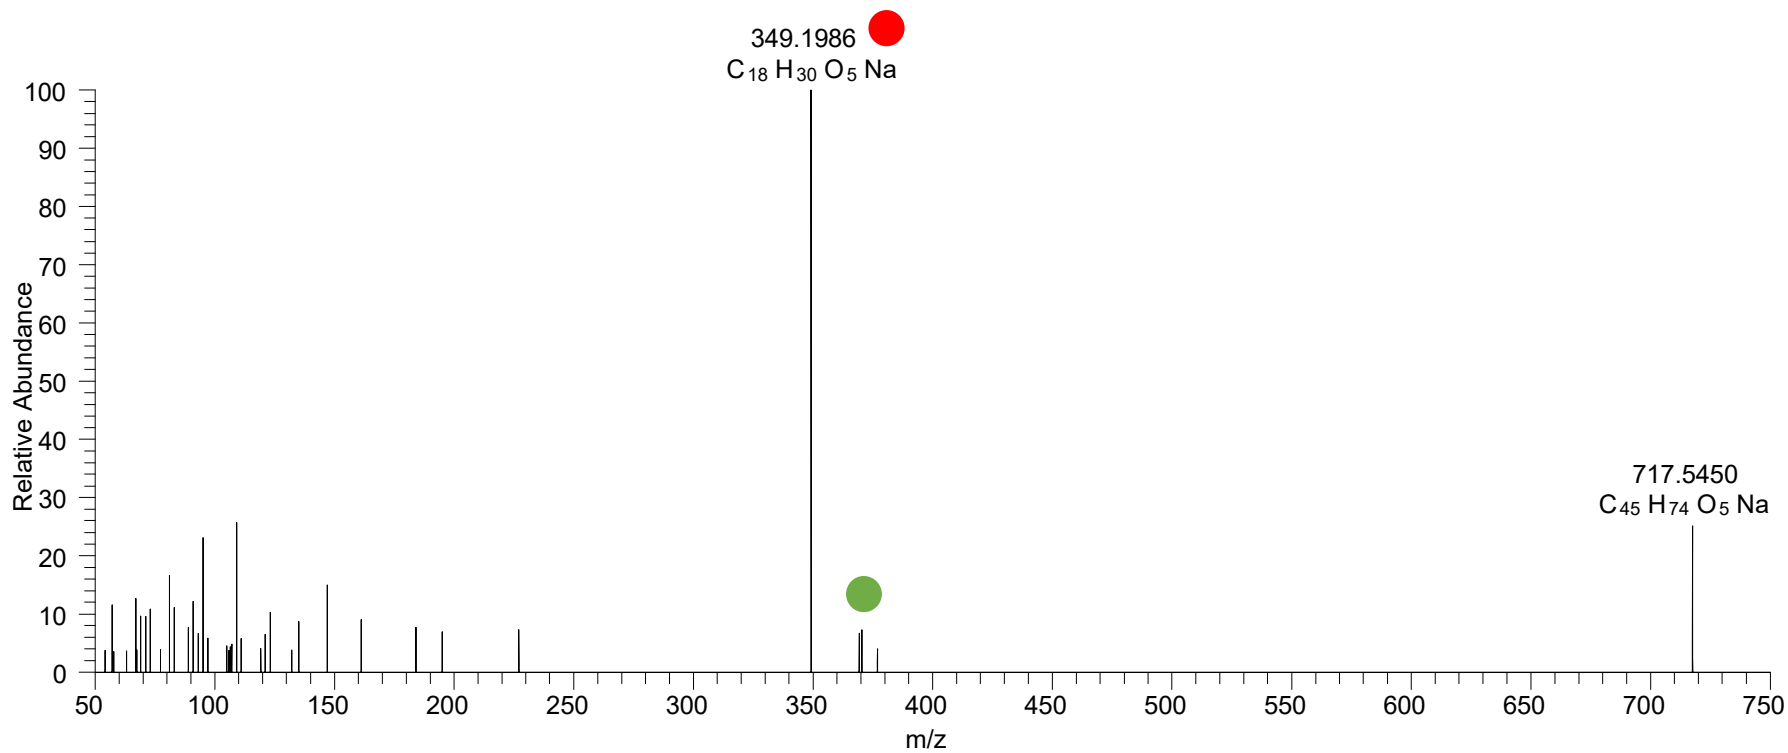

# CE(18:3<OH,2O>)

## RT 21.9

[oxCE+Na]<sup>+</sup>

XIC 717.5428 NL: 6.14E4

- Fragments containing oxFAs
- Fragments related to water loss
- Fragments not containing oxFAs
- Position-specific fragments
- Fragments related to other oxLPPs

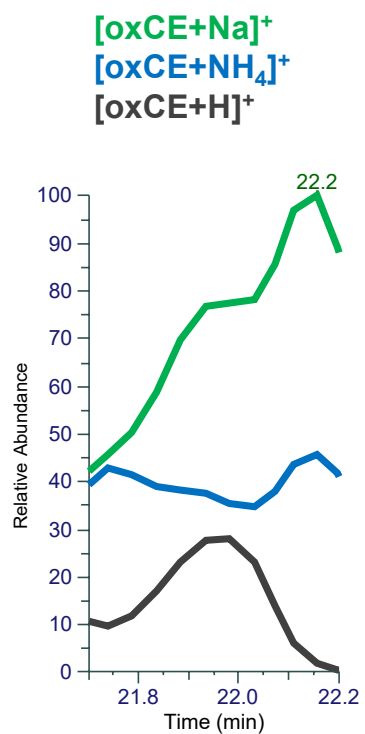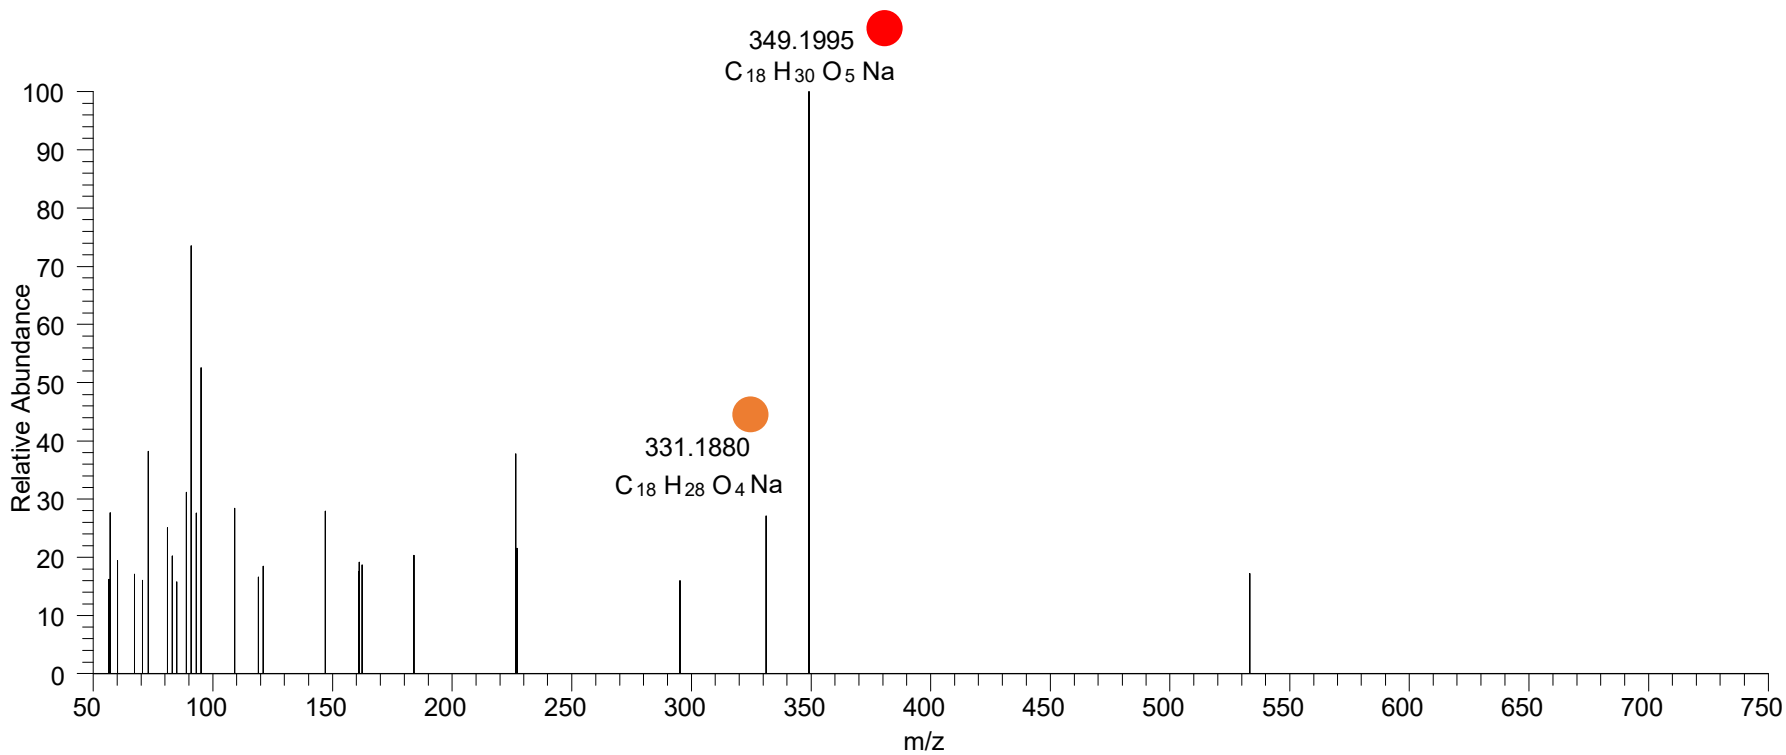

# CE(18:3<3O>) RT 23.3

[oxCE+Na]<sup>+</sup>

XIC 717.5428 NL: 1.01E5

- Fragments containing oxFAs
- Fragments related to water loss
- Fragments not containing oxFAs
- Position-specific fragments
- Fragments related to other oxLPPs

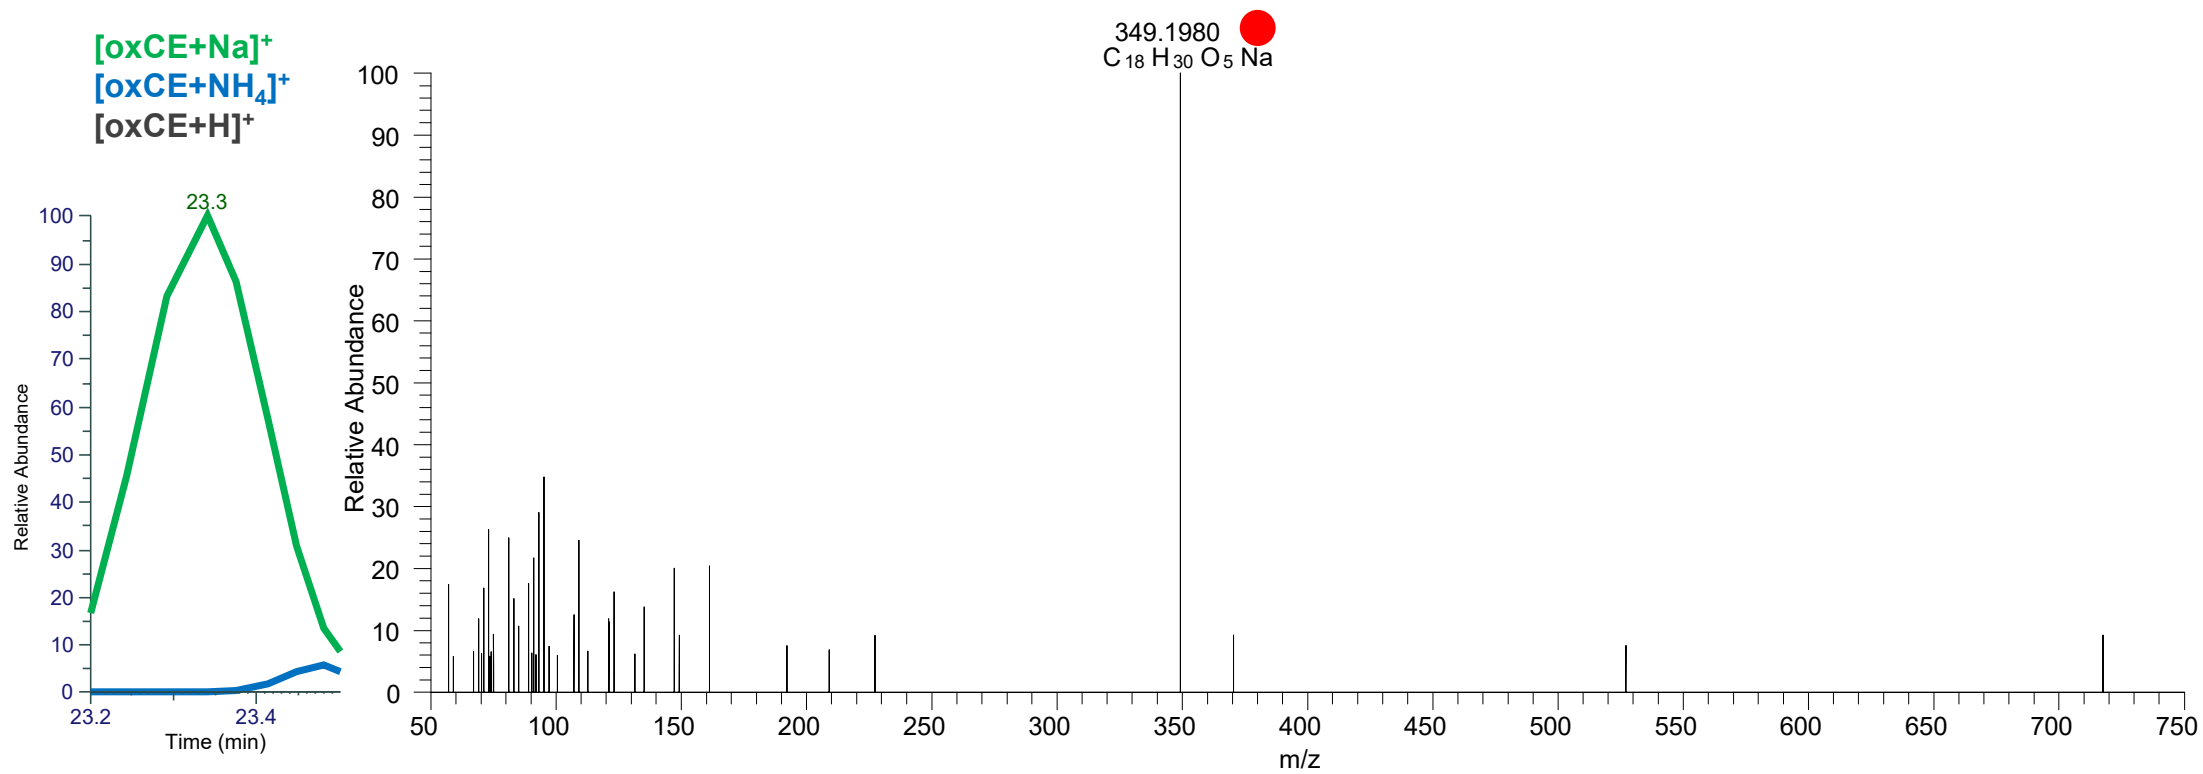

# CE(18:2<3O>) RT 21.4

[oxCE+Na]<sup>+</sup>

XIC 719.5585 NL: 1.05E5

- Fragments containing oxFAs
- Fragments related to water loss
- Fragments not containing oxFAs
- Position-specific fragments
- Fragments related to other oxLPPs

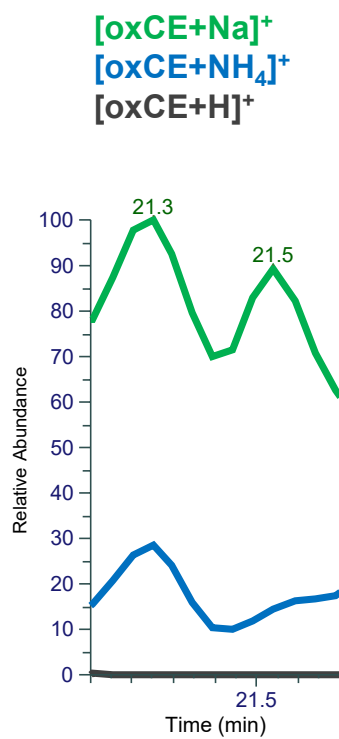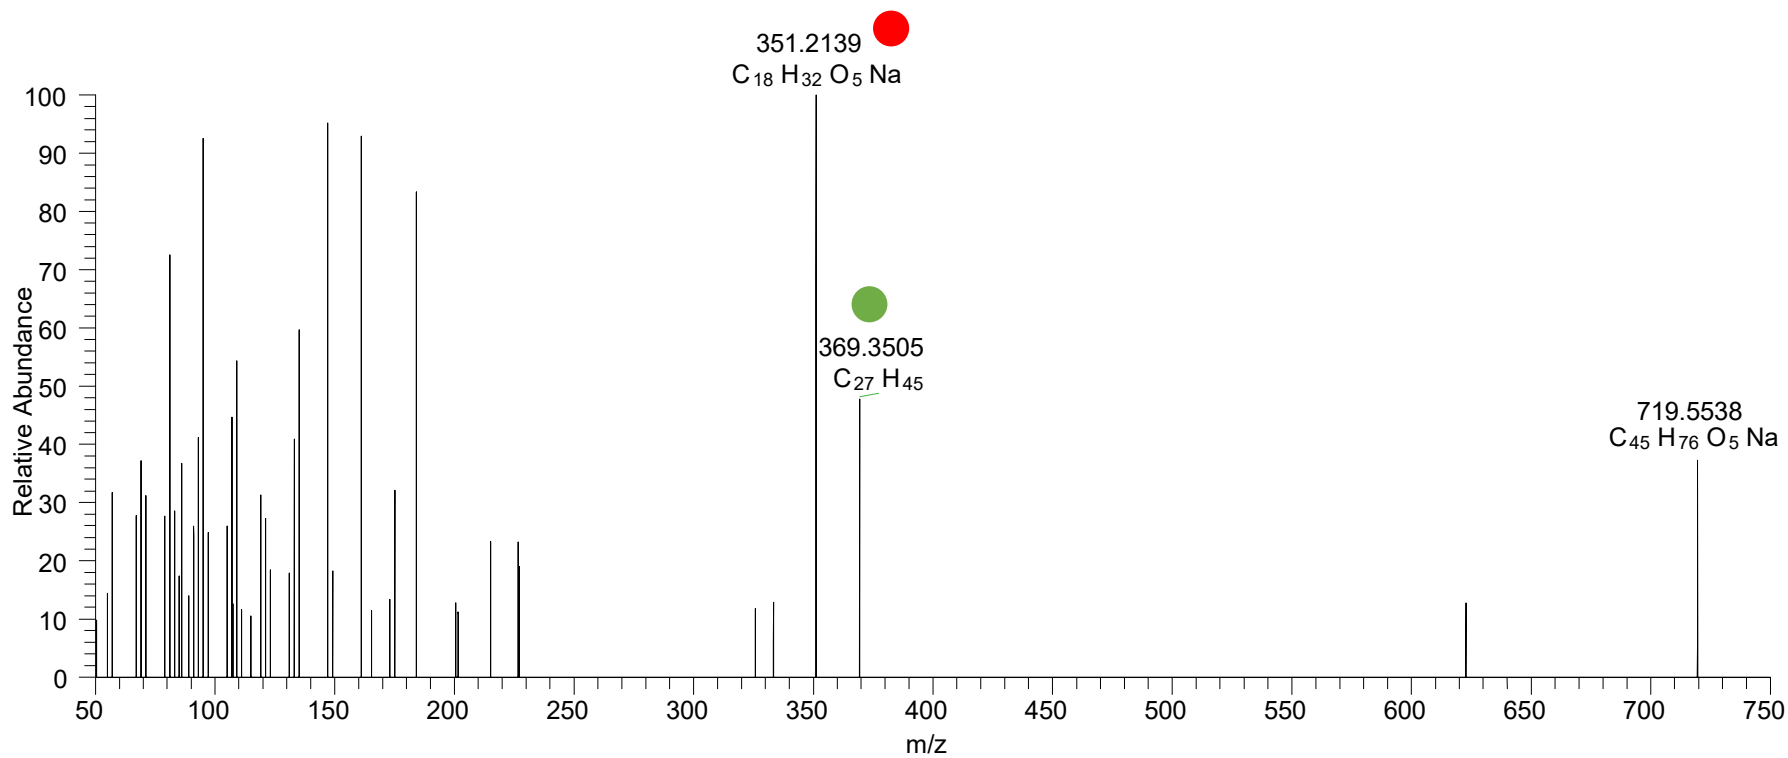

# CE(18:2<OH{9},OOH{13}>) RT 22.3

[oxCE+Na]<sup>+</sup>

XIC 719.5585 NL: 2.66E5

- Fragments containing oxFAs
- Fragments related to water loss
- Fragments not containing oxFAs
- Position-specific fragments
- Fragments related to other oxLPPs

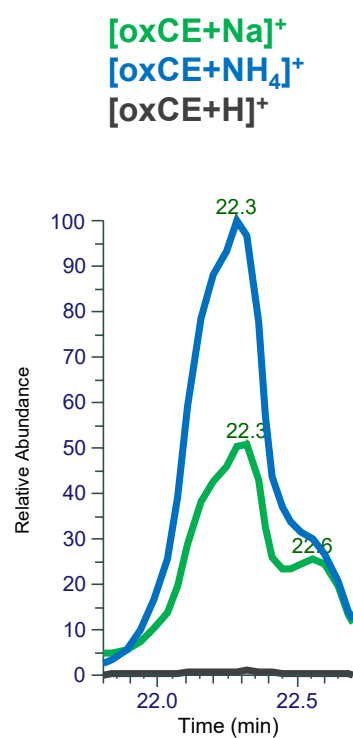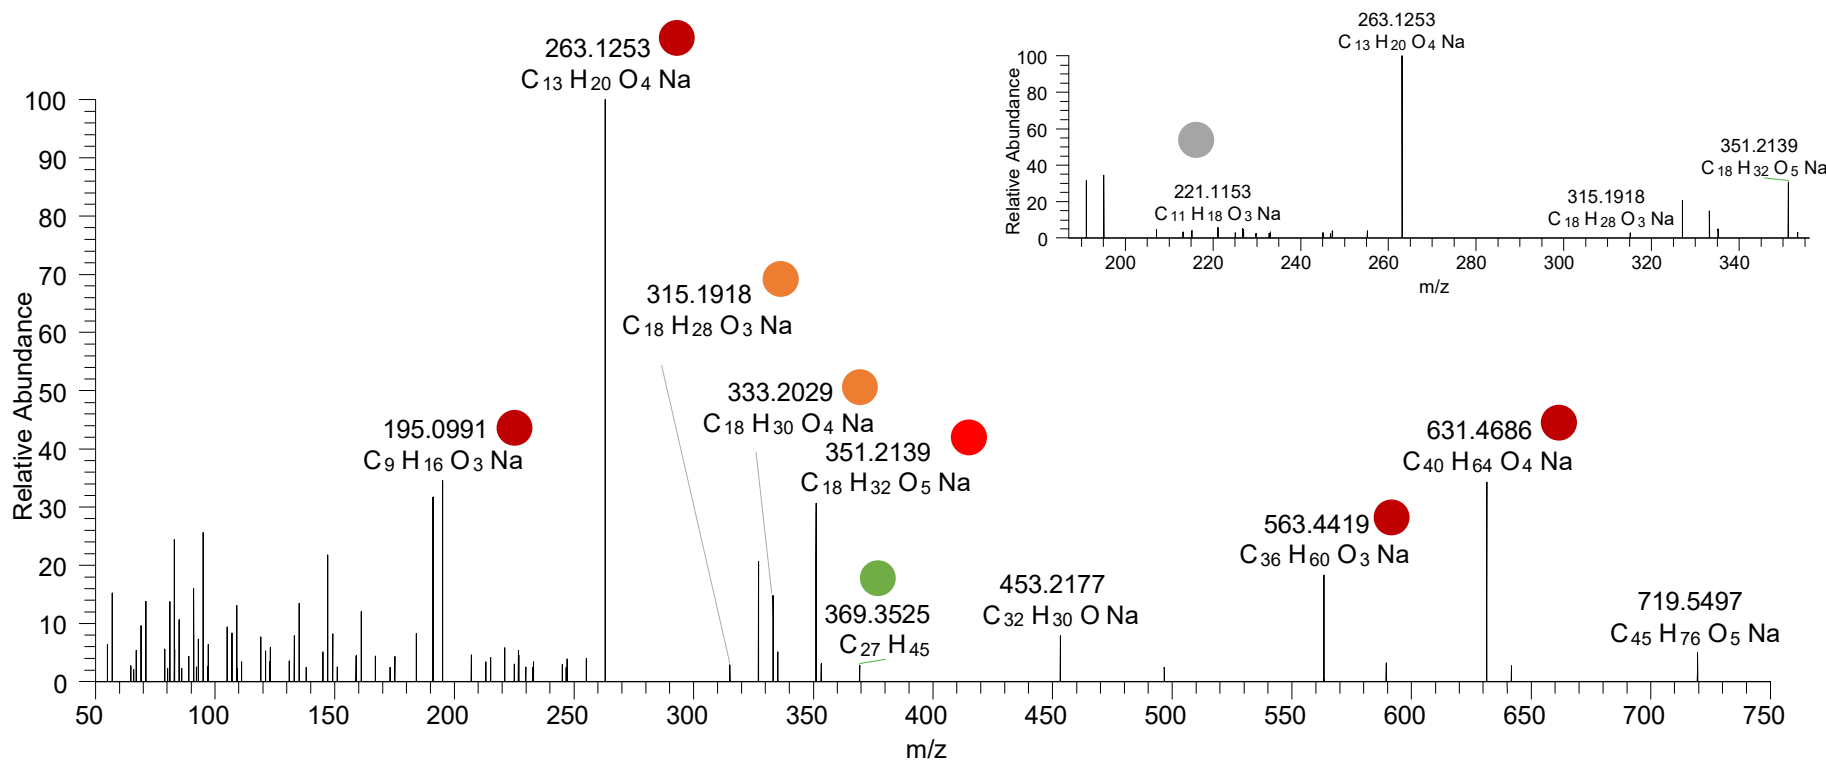

# CE(18:1<ep{10-11},OOH{13}> RT 22.6

[oxCE+Na]<sup>+</sup>

XIC 719.5585 NL: 2.66E5

- Fragments containing oxFAs
- Fragments related to water loss
- Fragments not containing oxFAs
- Position-specific fragments
- Fragments related to other oxLPPs

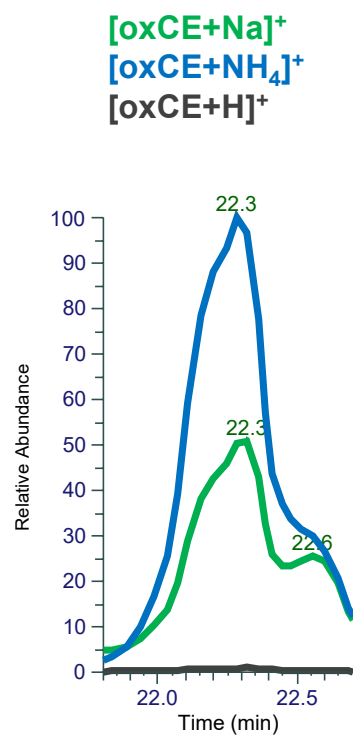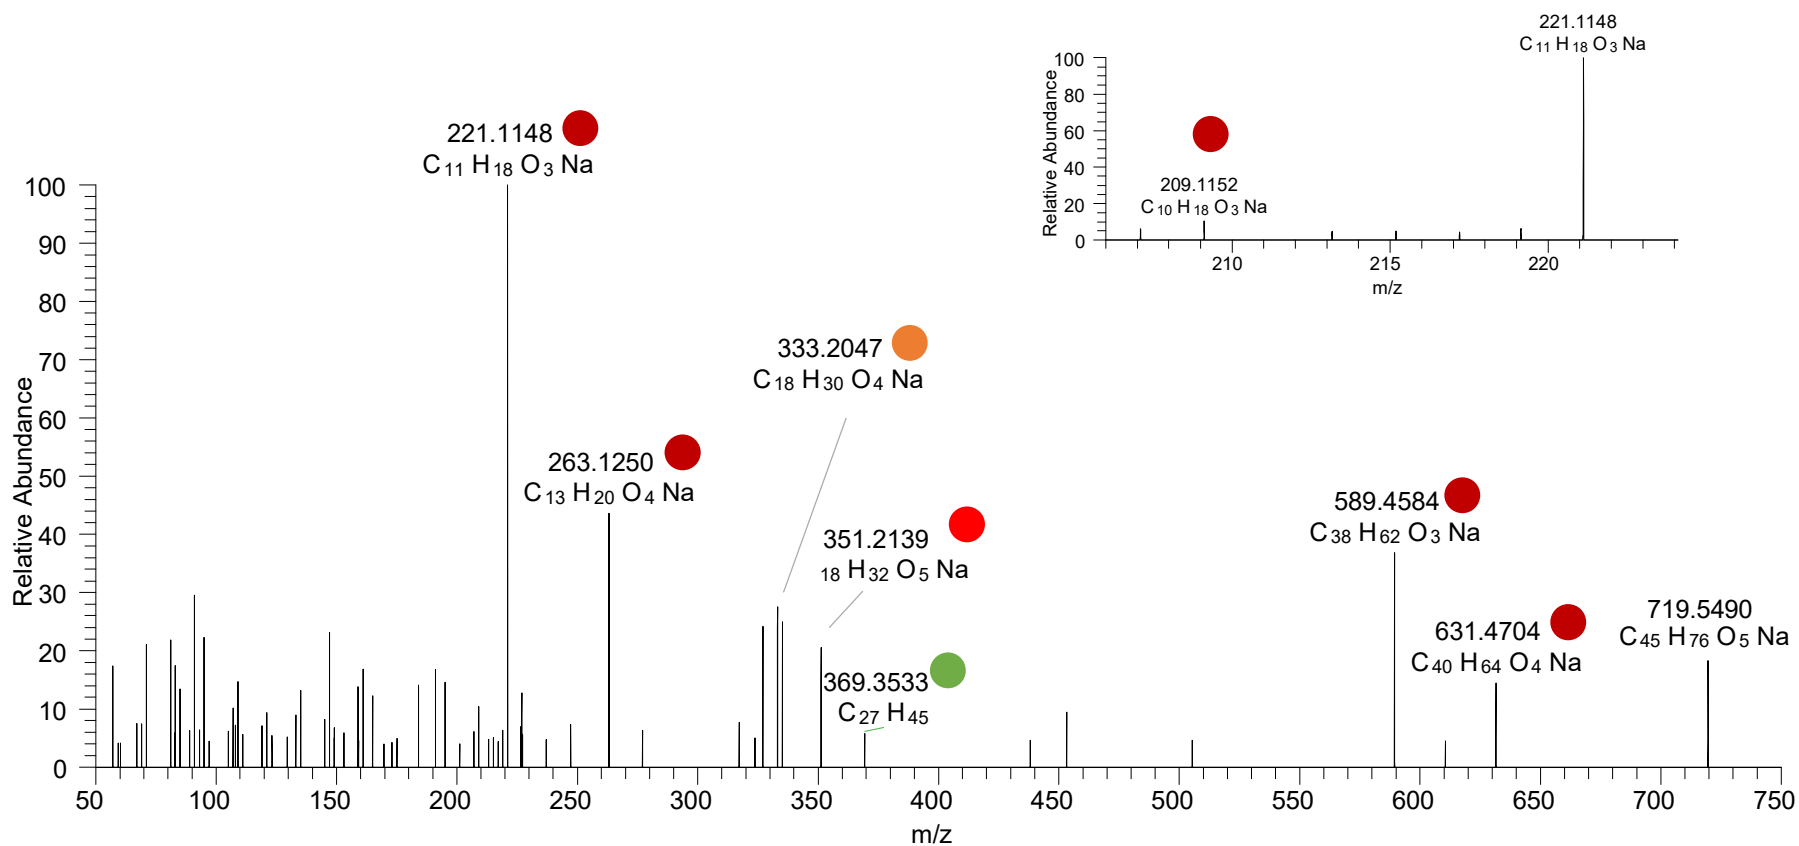

# CE(20:5<OH,oxo>) RT 20.6

[oxCE+Na]<sup>+</sup>

XIC 723.5323 NL: 8.34E4

- Fragments containing oxFAs
- Fragments related to water loss
- Fragments not containing oxFAs
- Position-specific fragments
- Fragments related to other oxLPPs

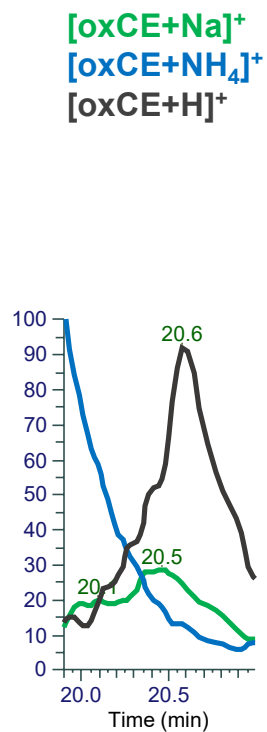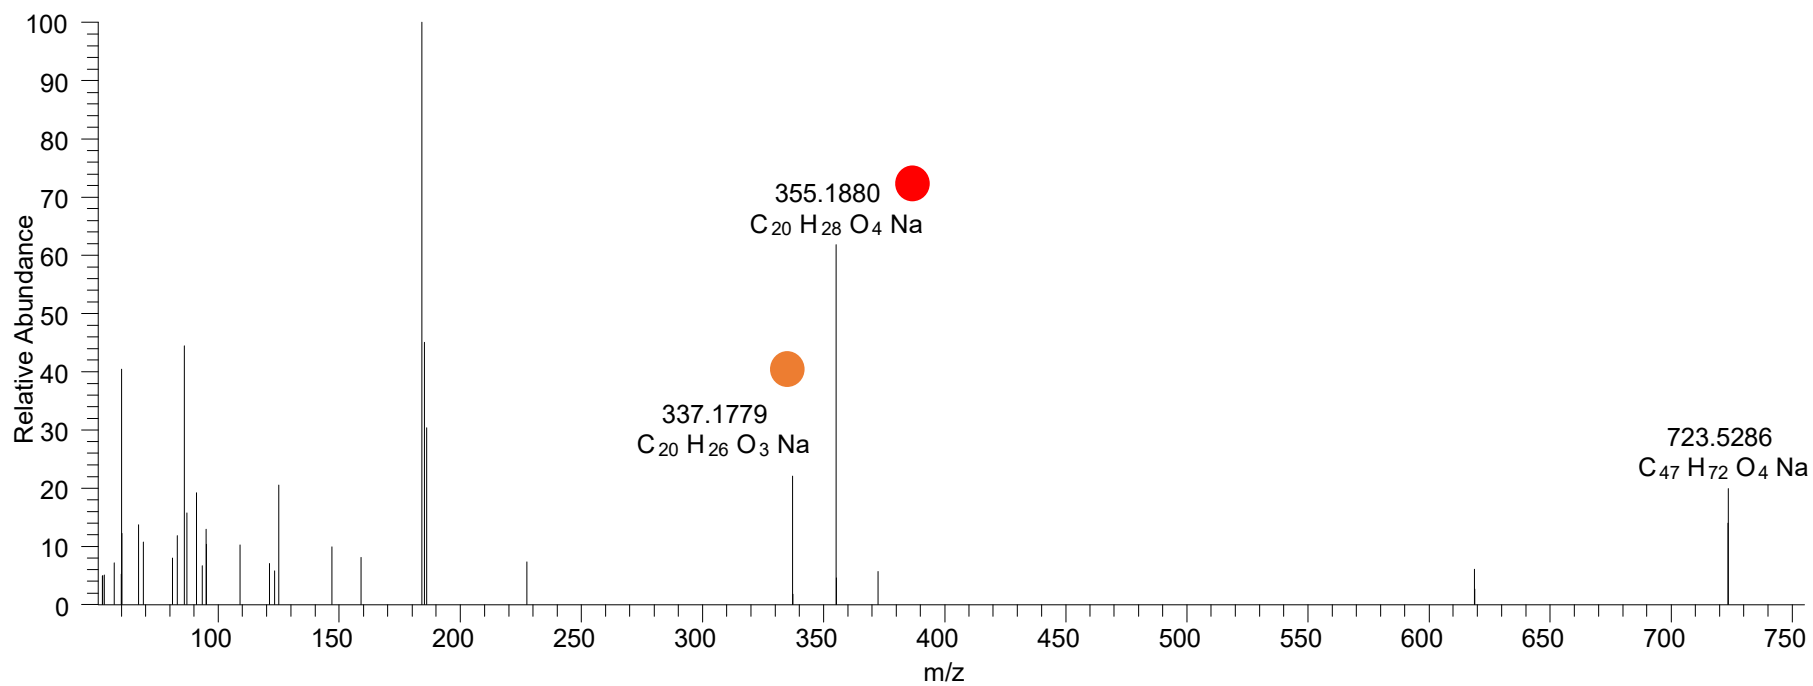

# CE(20:5<oxo,O>) RT 21.1-21.2

[oxCE+Na]<sup>+</sup>

XIC 723.5323 NL: 3.31E4

- Fragments containing oxFAs
- Fragments related to water loss
- Fragments not containing oxFAs
- Position-specific fragments
- Fragments related to other oxLPPs

[oxCE+Na]<sup>+</sup>  
[oxCE+NH<sub>4</sub>]<sup>+</sup>  
[oxCE+H]<sup>+</sup>

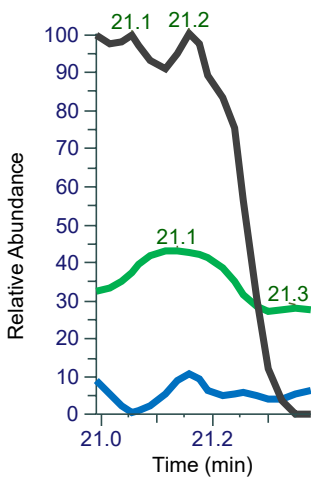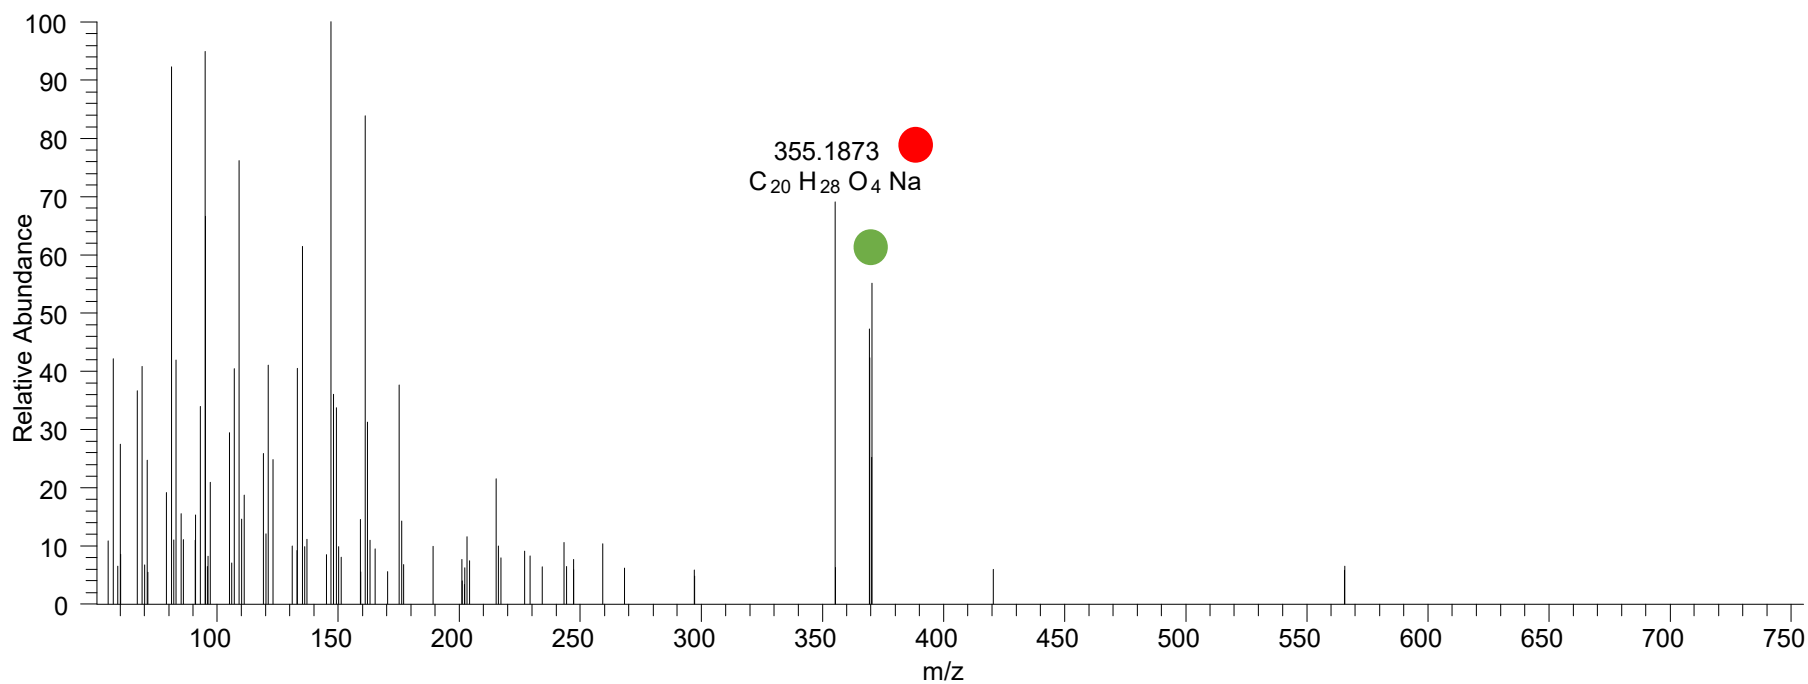



# CE(20:6<2O>) RT 22.5

[oxCE+Na]<sup>+</sup>

XIC 723.5323 NL: 4.84E4

- Fragments containing oxFAs
- Fragments related to water loss
- Fragments not containing oxFAs
- Position-specific fragments
- Fragments related to other oxLPPs

[oxCE+Na]<sup>+</sup>  
[oxCE+NH<sub>4</sub>]<sup>+</sup>  
[oxCE+H]<sup>+</sup>

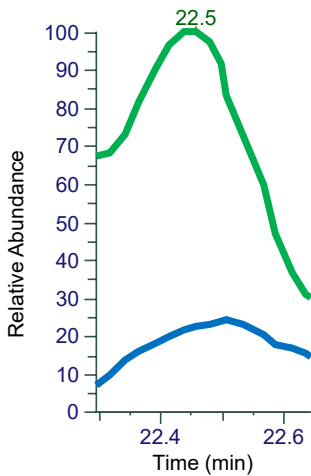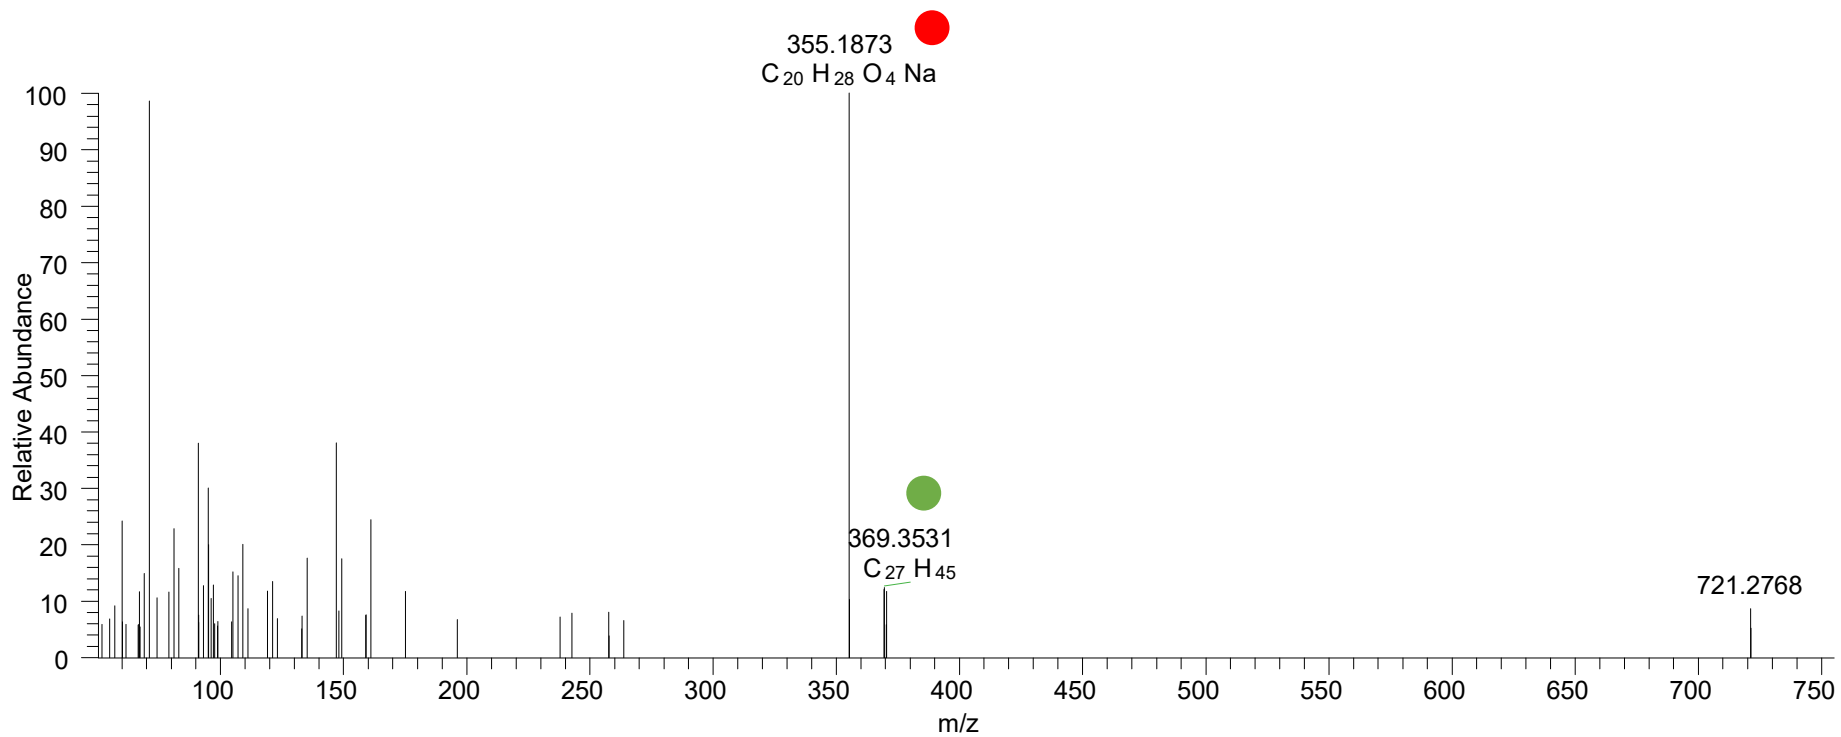

# CE(20:5<2OH{9,14}>) RT 20.4

[oxCE+Na]<sup>+</sup>

XIC 725.5479 NL: 1.03E6

- Fragments containing oxFAs
- Fragments related to water loss
- Fragments not containing oxFAs
- Position-specific fragments
- Fragments related to other oxLPPs

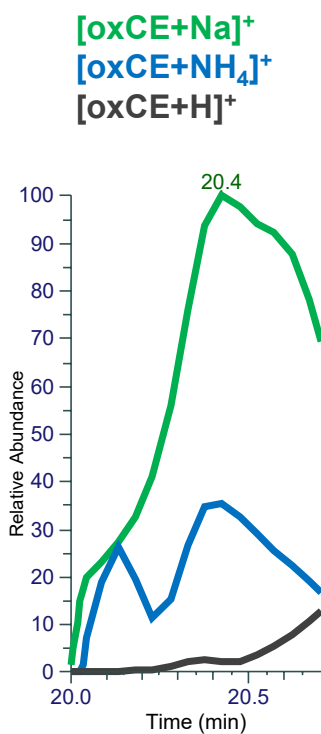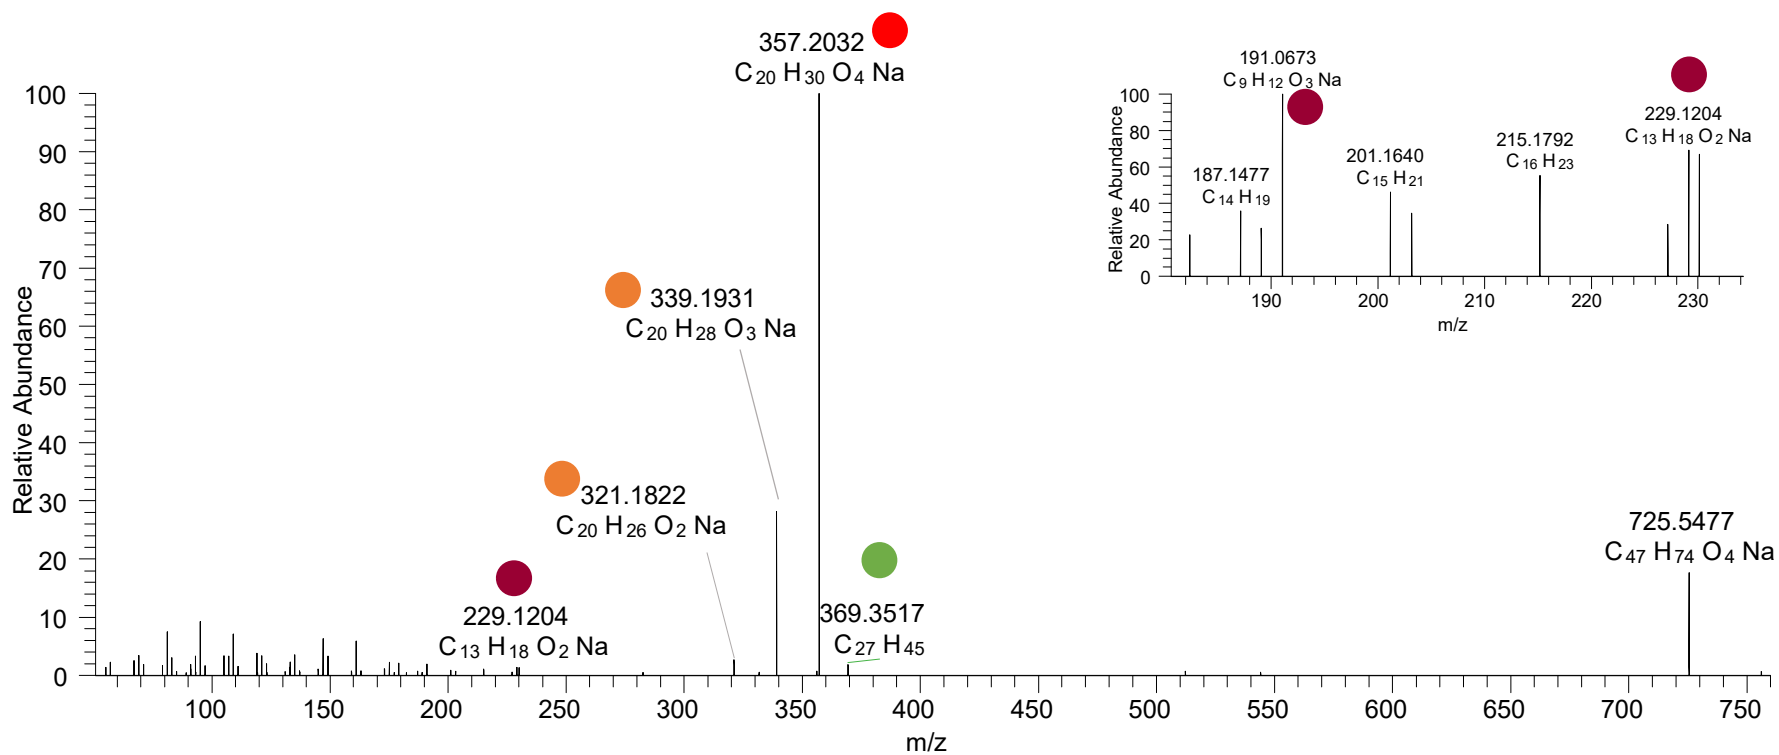

# CE(20:5<2OH{9,12}>) RT 20.6

[oxCE+Na]<sup>+</sup>

XIC 725.5479 NL: 1.03E6

- Fragments containing oxFAs
- Fragments related to water loss
- Fragments not containing oxFAs
- Position-specific fragments
- Fragments related to other oxLPPs

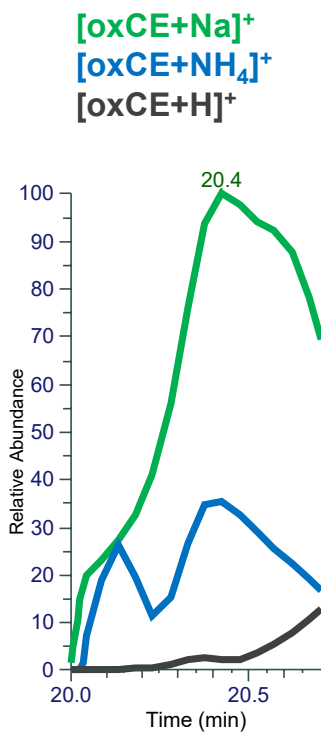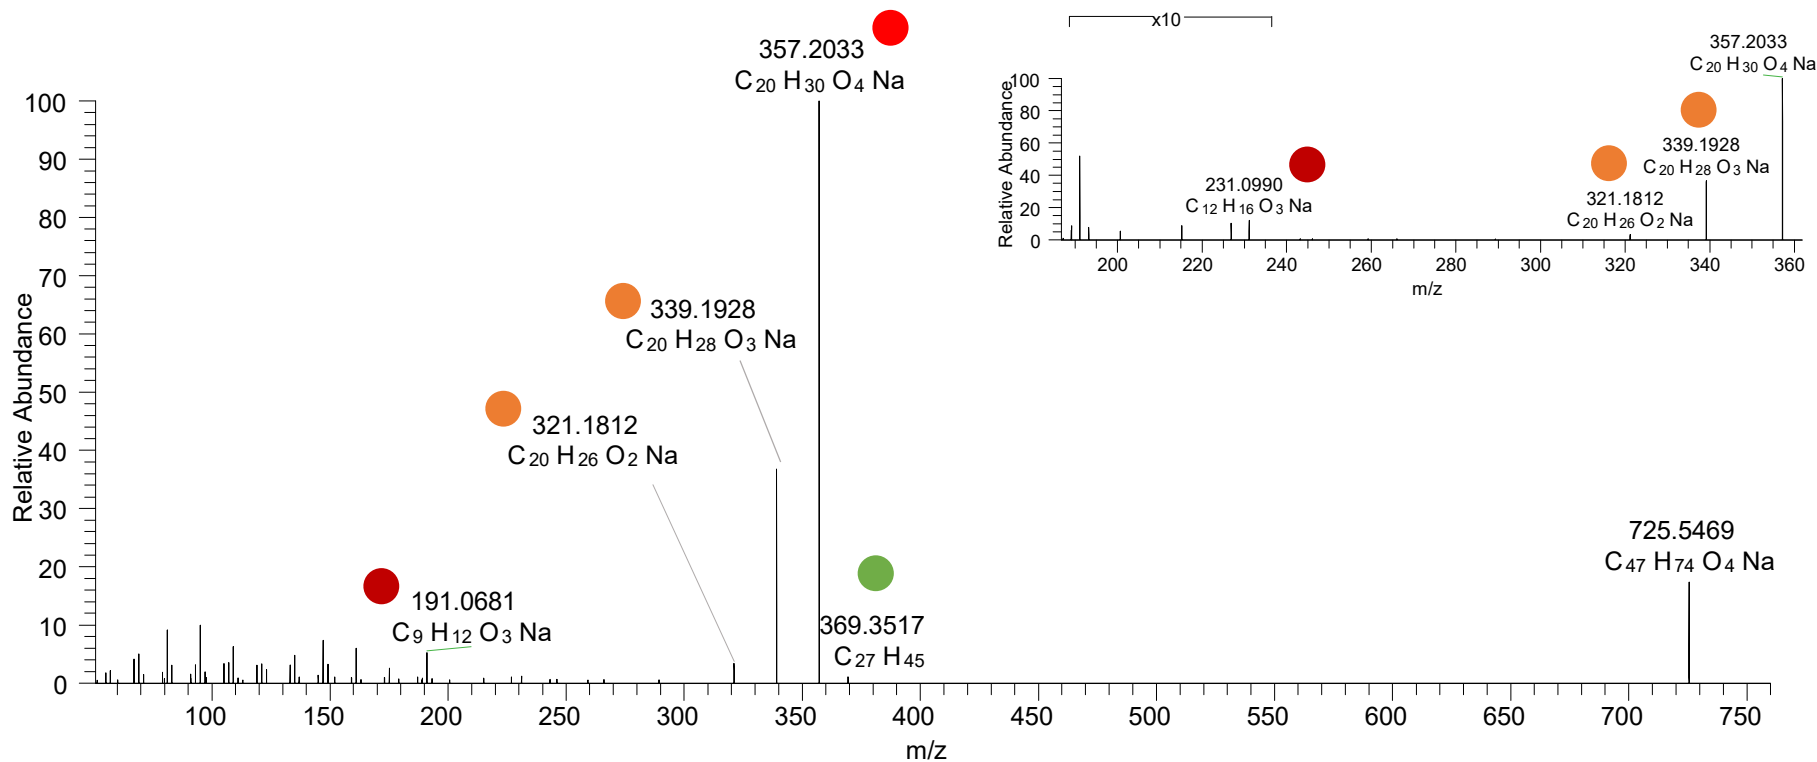

CE(20:5<OOH{9}>)  
 CE(20:5<OOH{12}>)  
 CE(20:5<OOH{15}>)  
 CE(20:5<OOH{18}>)  
 RT 23.0

[oxCE+Na]<sup>+</sup>

XIC 725.5479 NL: 6.18E5

- Fragments containing oxFAs
- Fragments related to water loss
- Fragments not containing oxFAs
- Position-specific fragments
- Fragments related to other oxLPPs

[oxCE+Na]<sup>+</sup>  
 [oxCE+NH<sub>4</sub>]<sup>+</sup>  
 [oxCE+H]<sup>+</sup>

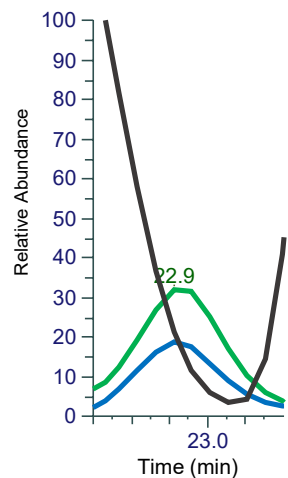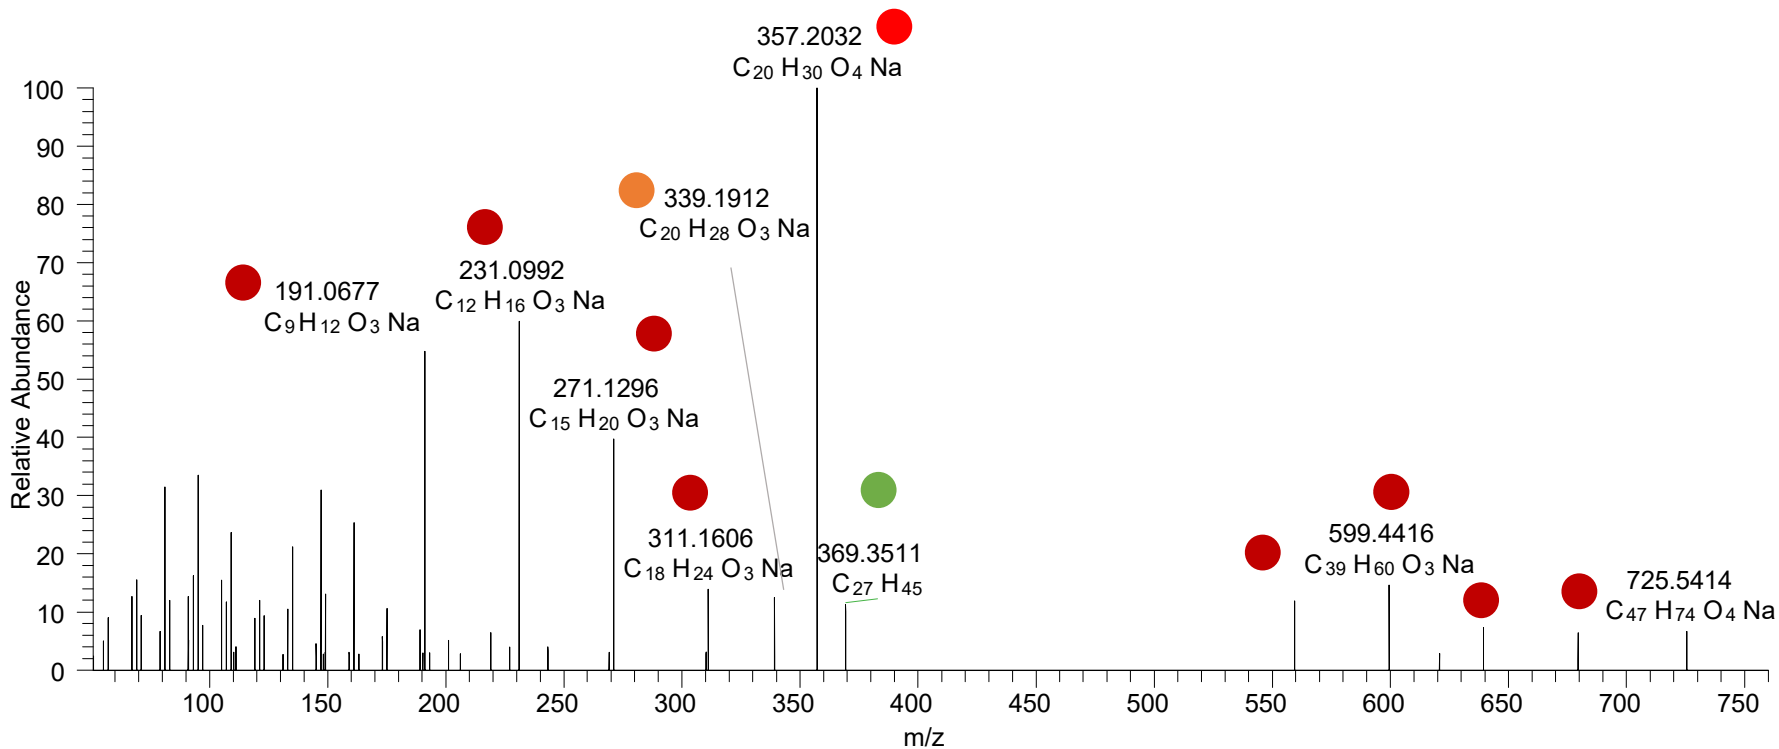

# CE(20:4<2OH{9,14}>) RT 21.1

[oxCE+Na]<sup>+</sup>

XIC 727.5636 NL: 3.04E6

- Fragments containing oxFAs
- Fragments related to water loss
- Fragments not containing oxFAs
- Position-specific fragments
- Fragments related to other oxLPPs

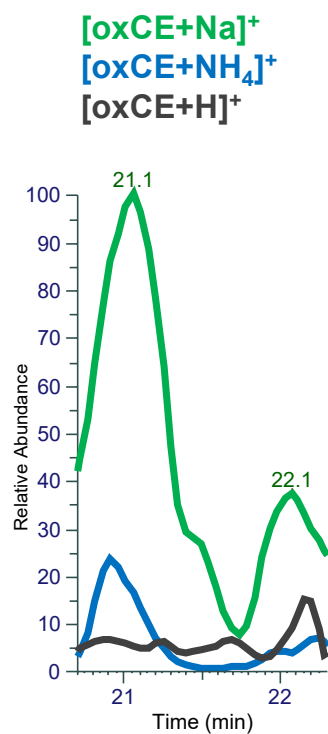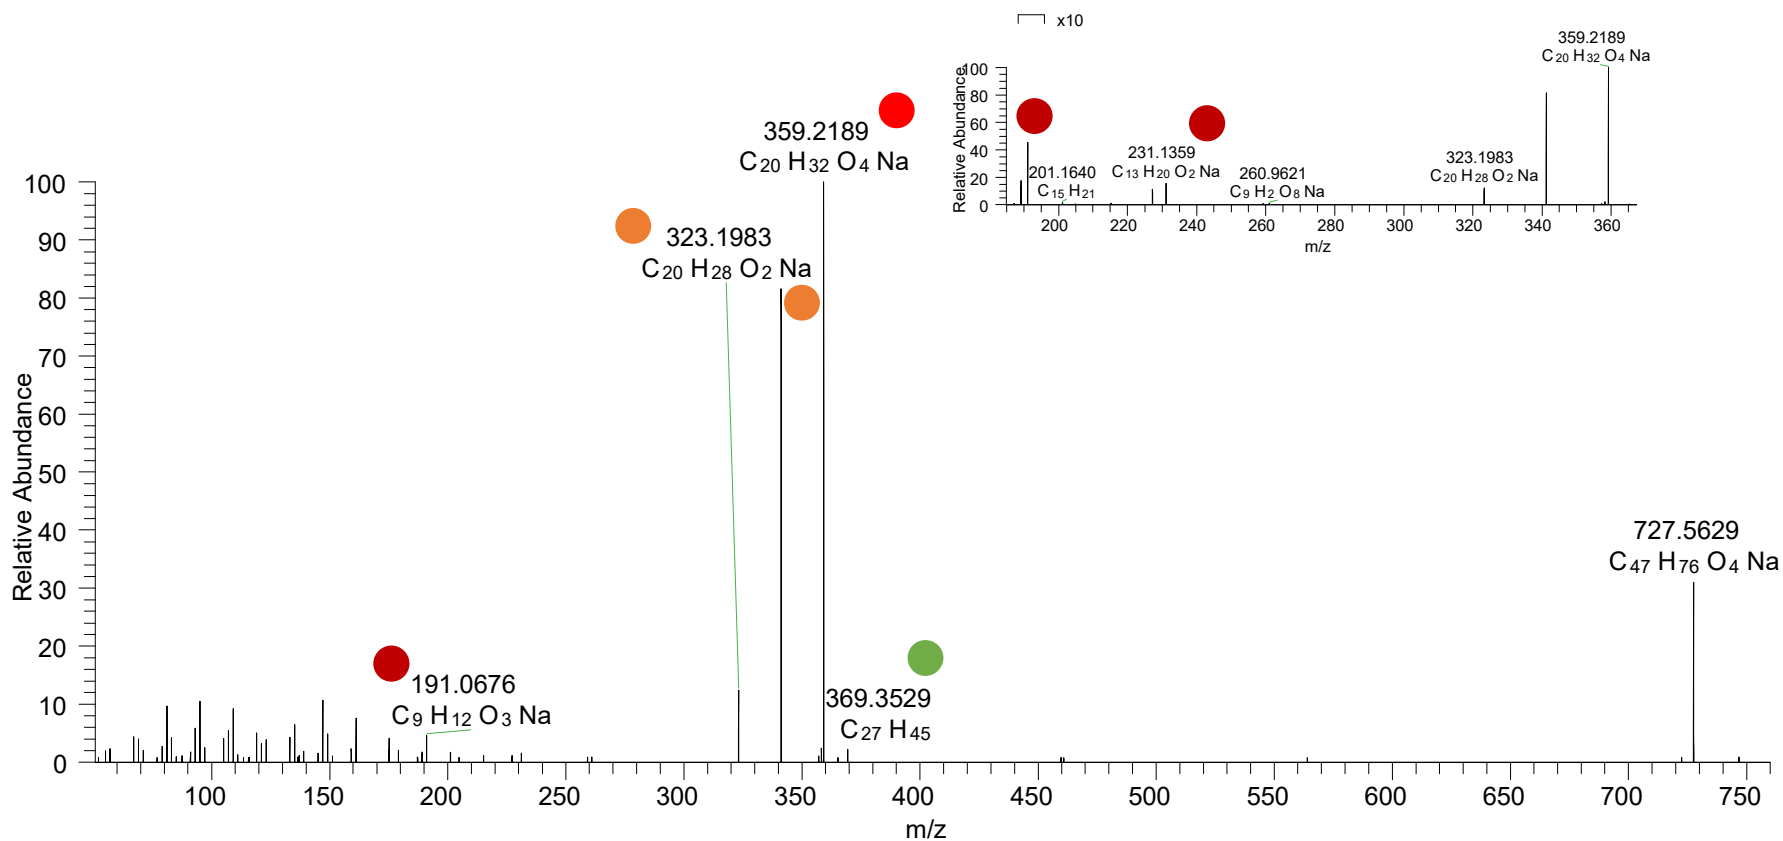

# CE(20:3<OH,oxo{11}>) RT 22.7

[oxCE+Na]<sup>+</sup>

XIC 727.5636 NL: 6.27E5

- Fragments containing oxFAs
- Fragments related to water loss
- Fragments not containing oxFAs
- Position-specific fragments
- Fragments related to other oxLPPs

[oxCE+Na]<sup>+</sup>  
[oxCE+NH<sub>4</sub>]<sup>+</sup>  
[oxCE+H]<sup>+</sup>

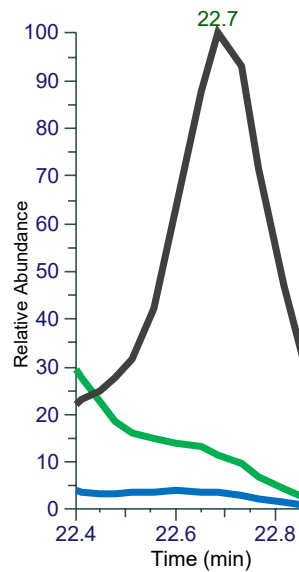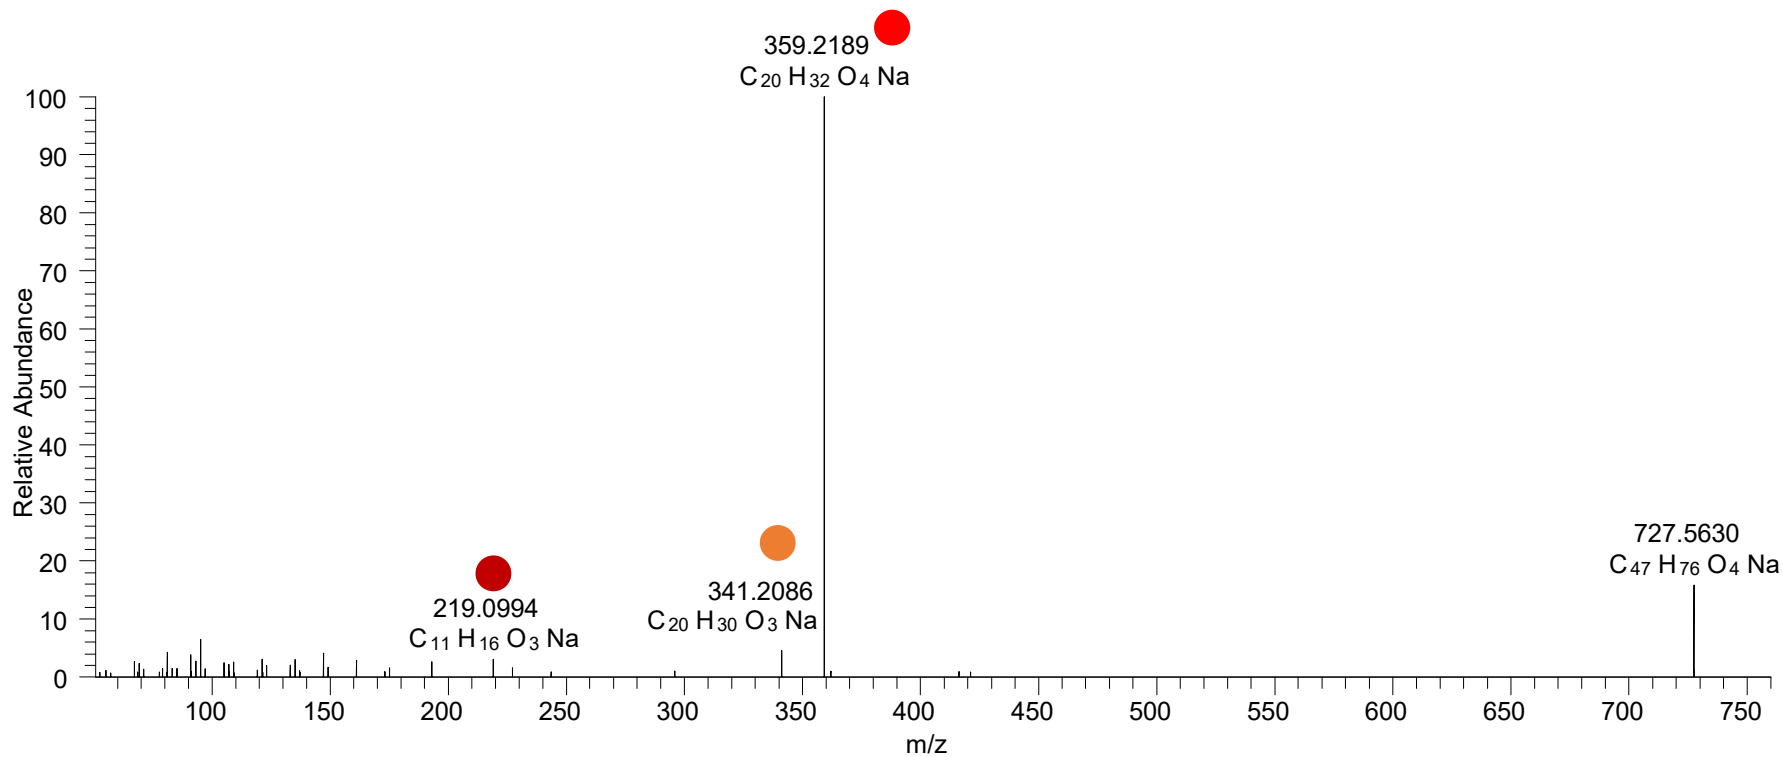

# CE(20:3<OH,ep>) RT 23.1

[oxCE+Na]<sup>+</sup>

XIC 727.5636 NL: 5.36E5

- Fragments containing oxFAs
- Fragments related to water loss
- Fragments not containing oxFAs
- Position-specific fragments
- Fragments related to other oxLPPs

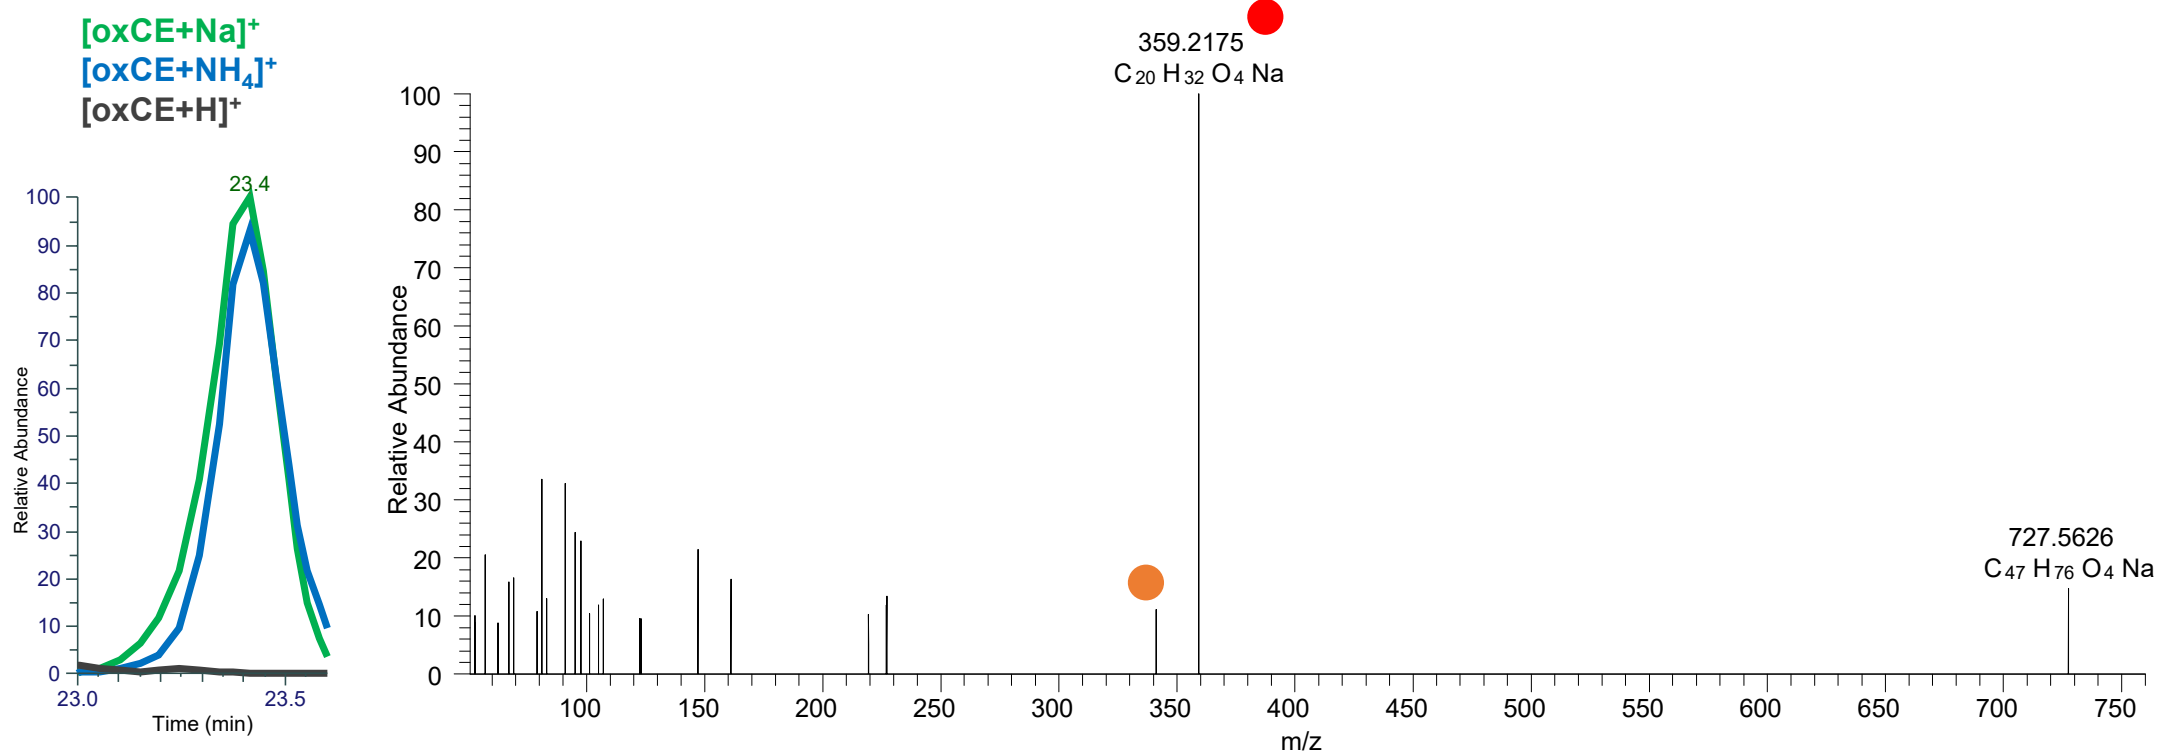

CE(20:4<OOH{9}>)  
 CE(20:4<OOH{10}>)  
 CE(20:4<OOH{12}>)  
 CE(20:4<OOH{15}>)  
 CE(20:4<OOH{13}>)  
 RT 23.3

[oxCE+Na]<sup>+</sup>

XIC 727.5636 NL: 5.36E5

● Fragments containing oxFAs

● Fragments related to water loss

● Fragments not containing oxFAs

● Position-specific fragments

● Fragments related to other oxLPPs

[oxCE+Na]<sup>+</sup>  
 [oxCE+NH<sub>4</sub>]<sup>+</sup>  
 [oxCE+H]<sup>+</sup>

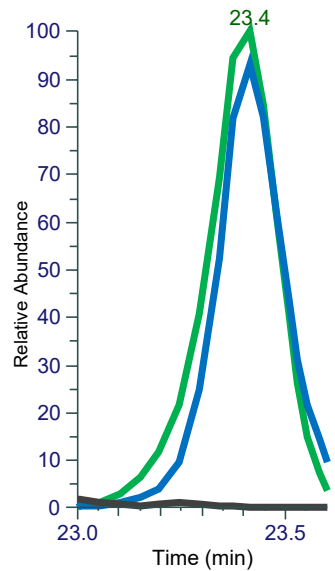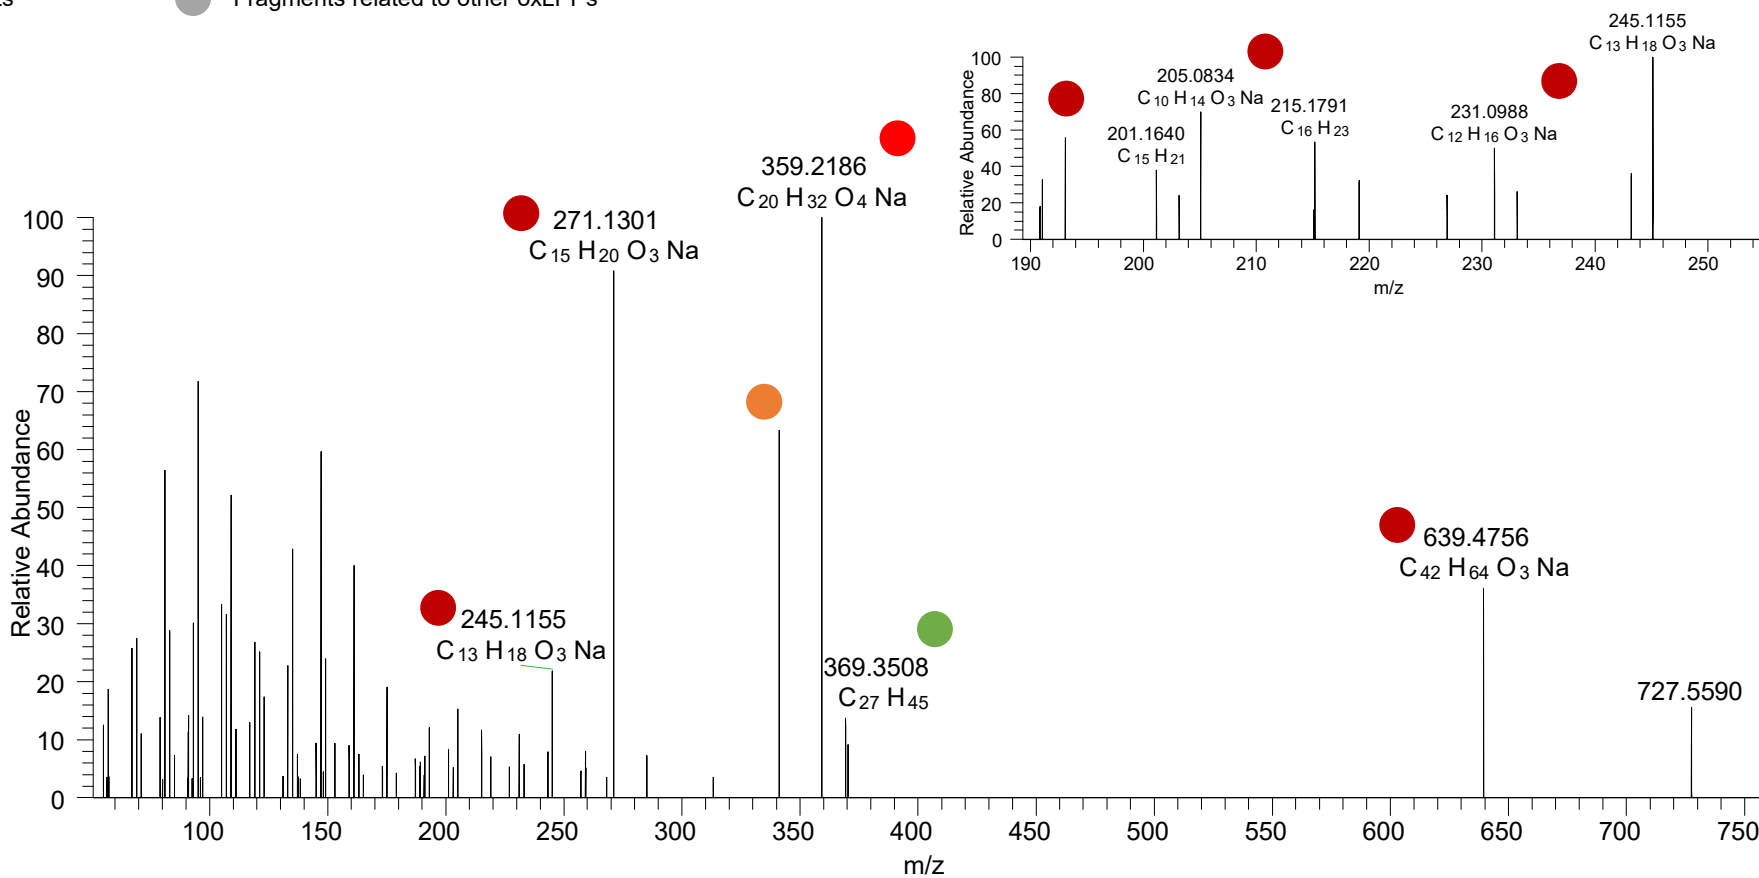



CE(20:4<OOH{9}>)  
 CE(20:4<OOH{11}>)  
 CE(20:4<OOH{12}>)  
 CE(20:4<OOH{15}>)  
 RT 23.4

[oxCE+Na]<sup>+</sup>

XIC 727.5636 NL: 5.36E5

● Fragments containing oxFAs

● Fragments related to water loss

● Fragments not containing oxFAs

● Position-specific fragments

● Fragments related to other oxLPPs

[oxCE+Na]<sup>+</sup>  
 [oxCE+NH<sub>4</sub>]<sup>+</sup>  
 [oxCE+H]<sup>+</sup>

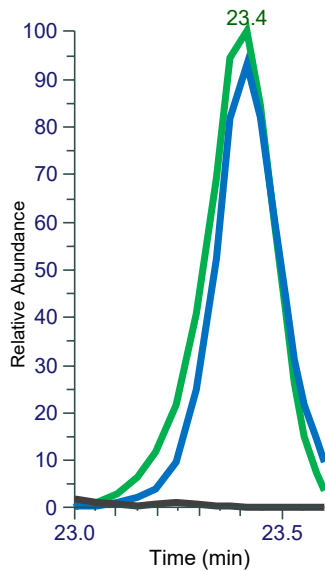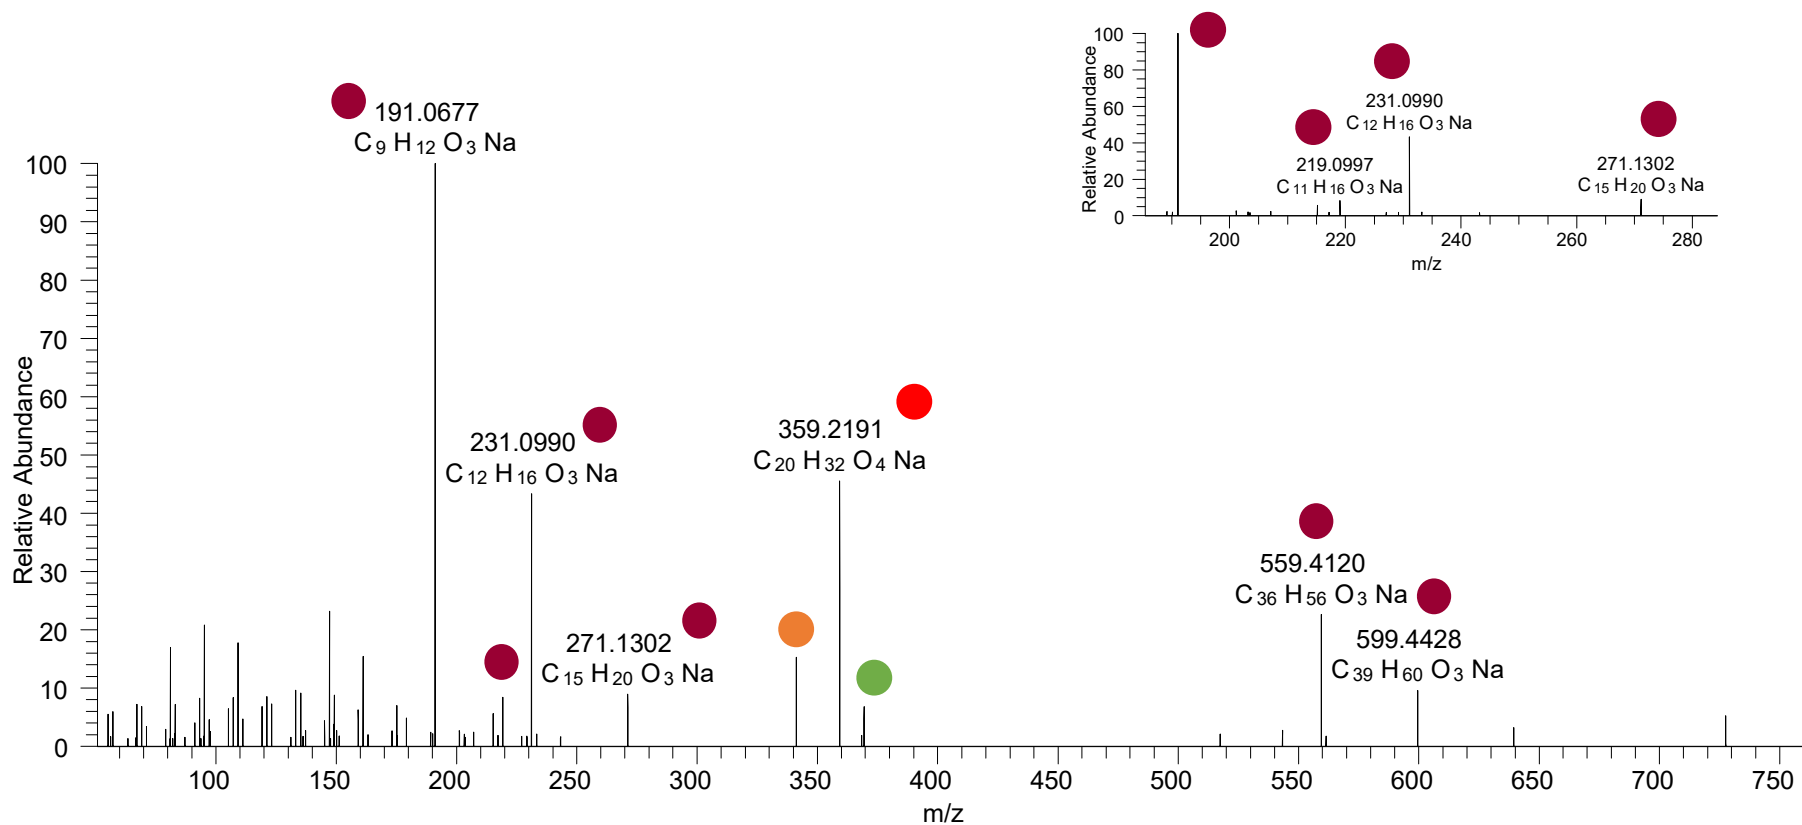

# CE(20:3<OH{9},OH>) RT 21.5

[oxCE+Na]<sup>+</sup>

XIC 729.5798 NL: 1.06E5

- Fragments containing oxFAs
- Fragments related to water loss
- Fragments not containing oxFAs
- Position-specific fragments
- Fragments related to other oxLPPs

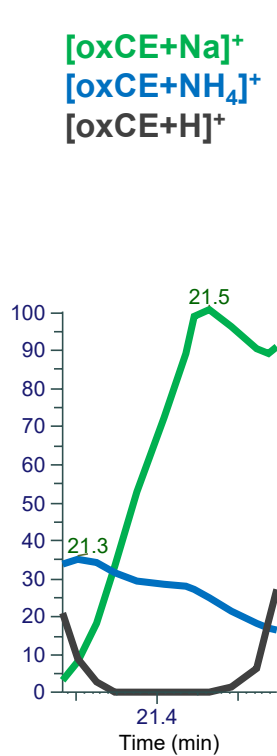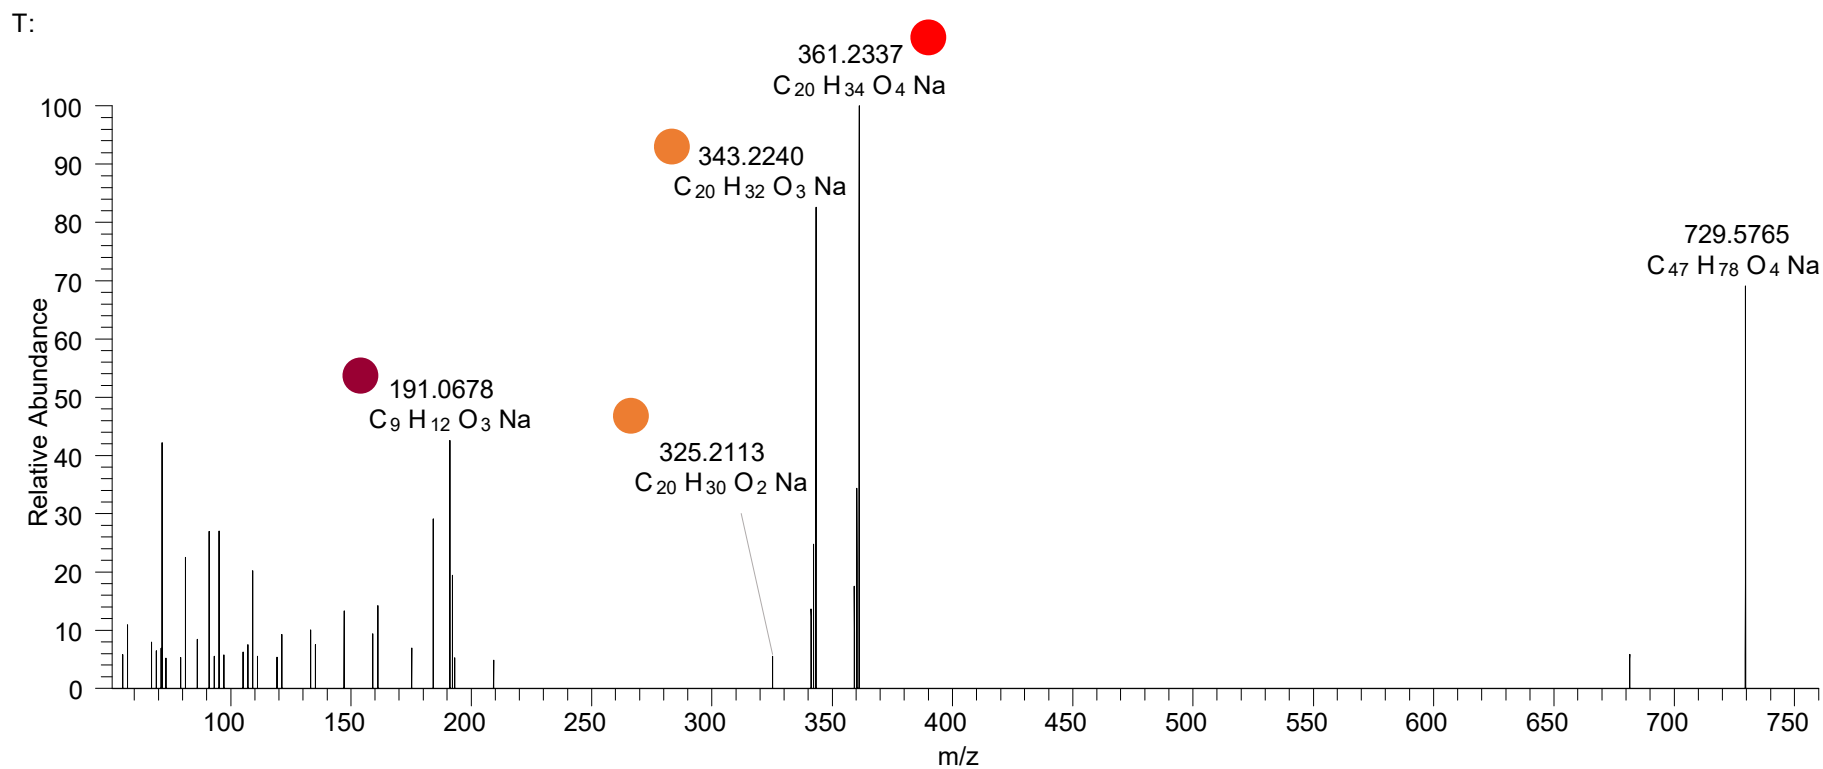

# CE(20:2<OH,ep>) RT 22.8

[oxCE+Na]<sup>+</sup>

XIC 729.5798 NL: 9.45E4

- Fragments containing oxFAs
- Fragments related to water loss
- Fragments not containing oxFAs
- Position-specific fragments
- Fragments related to other oxLPPs

[oxCE+Na]<sup>+</sup>  
[oxCE+NH<sub>4</sub>]<sup>+</sup>  
[oxCE+H]<sup>+</sup>

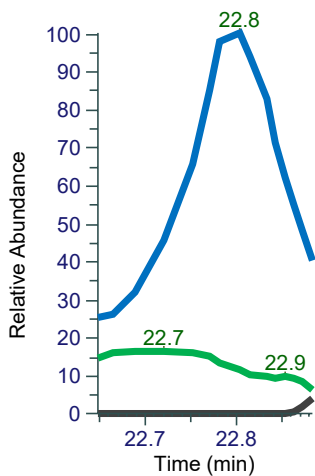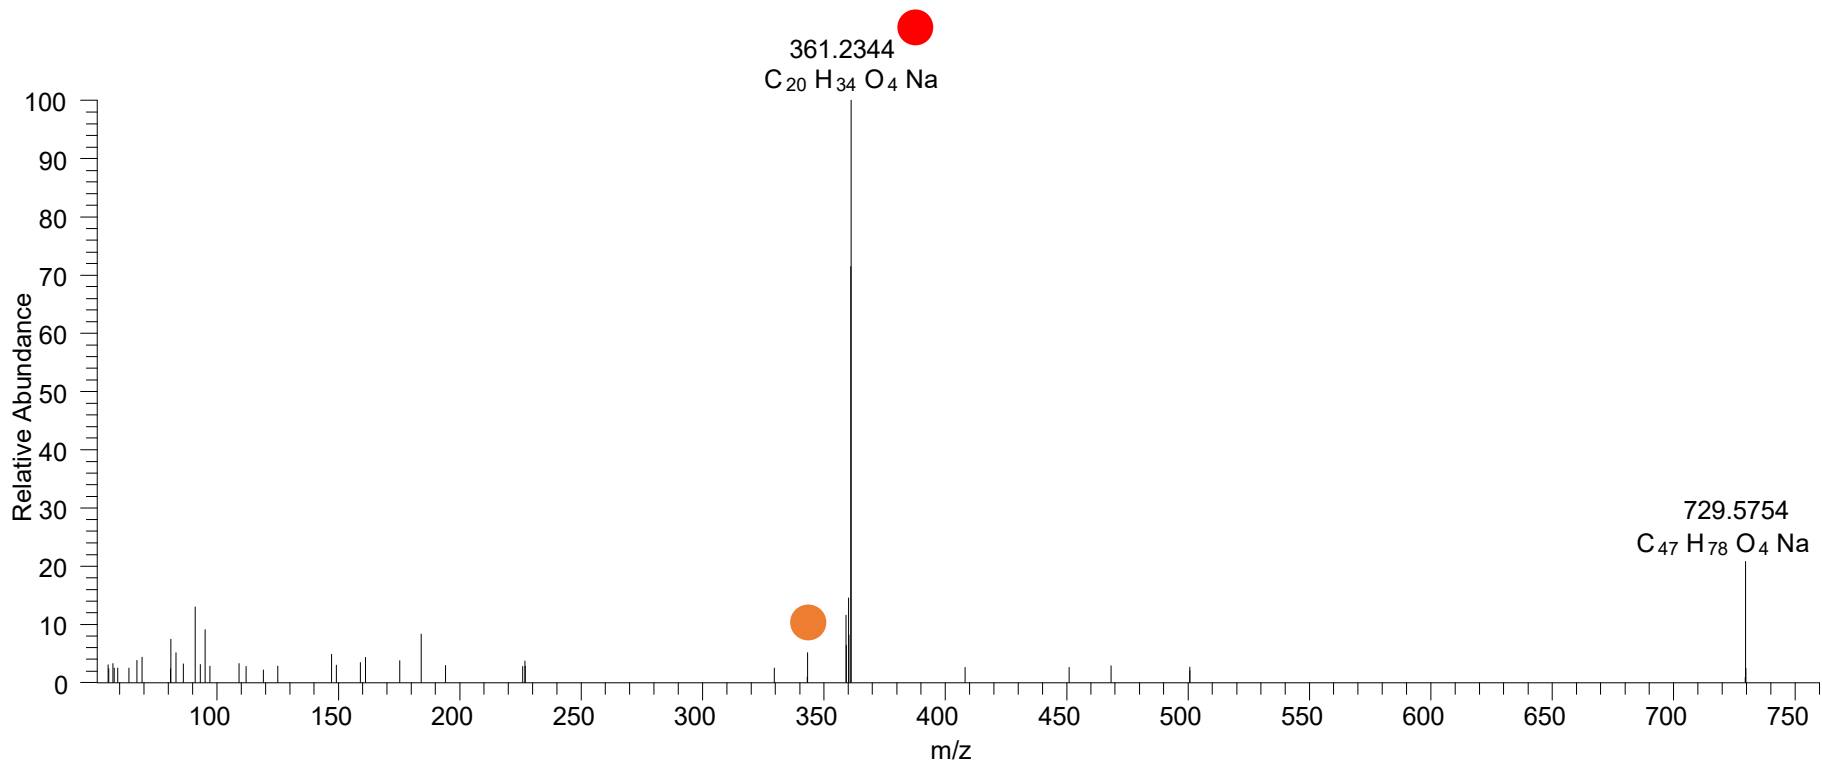

CE(20:3<OOH{15}>)  
CE(20:3<OOH{12}>)  
RT 23.8

[oxCE+Na]<sup>+</sup>

XIC 729.5798 NL: 9.80E5

- Fragments containing oxFAs
- Fragments related to water loss
- Fragments not containing oxFAs
- Position-specific fragments
- Fragments related to other oxLPPs

[oxCE+Na]<sup>+</sup>  
[oxCE+NH<sub>4</sub>]<sup>+</sup>  
[oxCE+H]<sup>+</sup>

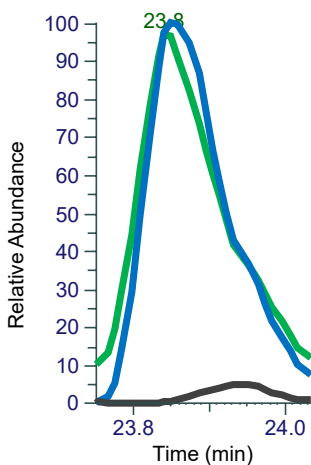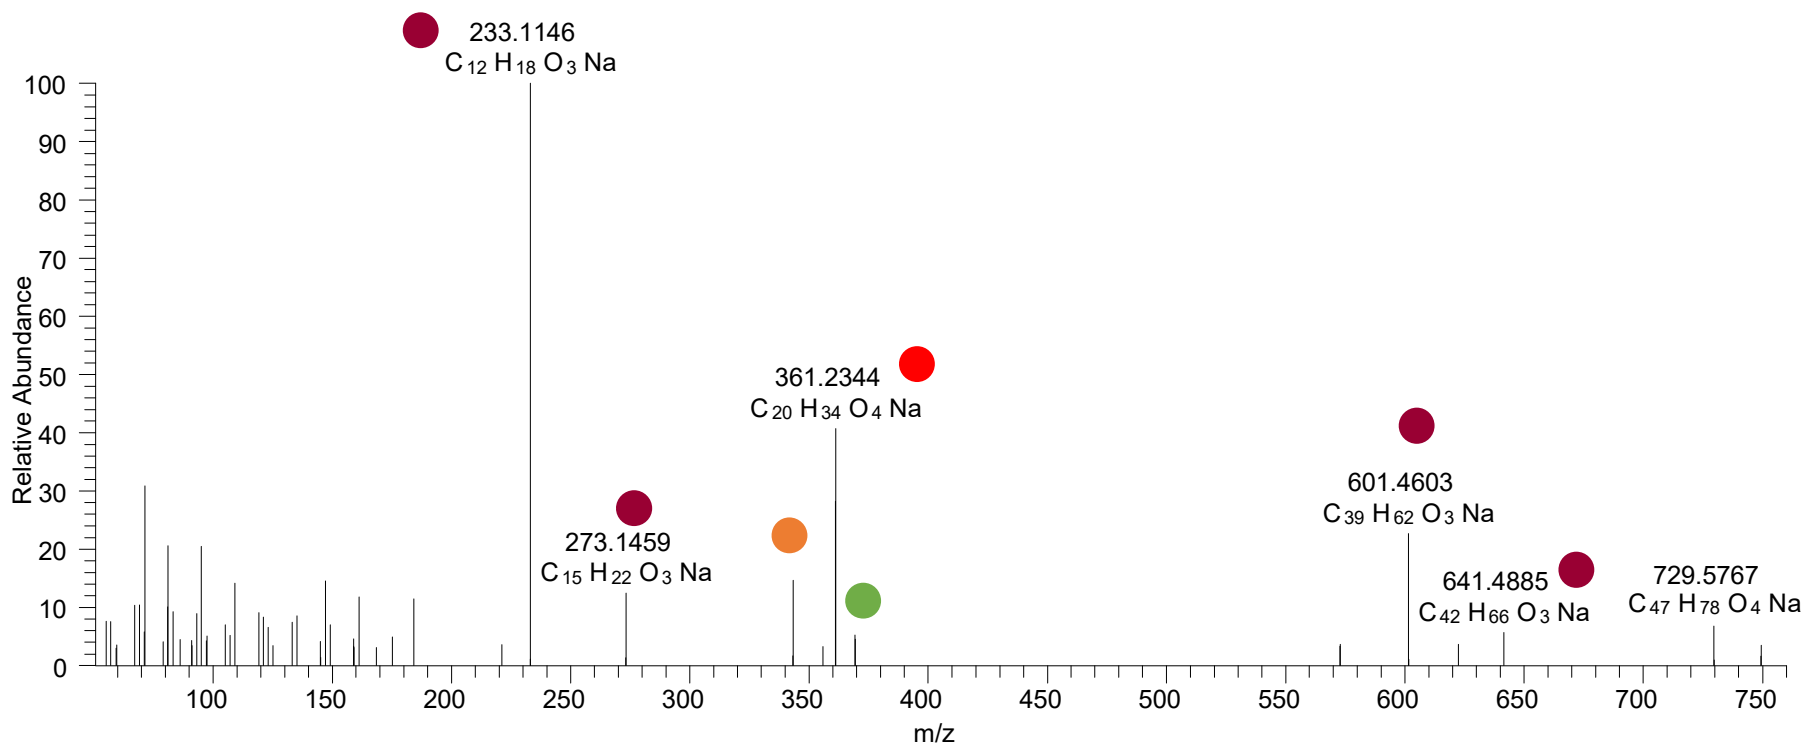

# CE(20:2<2O{12}>) RT 24.3

[oxCE+Na]<sup>+</sup>

XIC 731.5949 NL: 2.63E4

- Fragments containing oxFAs
- Fragments related to water loss
- Fragments not containing oxFAs
- Position-specific fragments
- Fragments related to other oxLPPs

[oxCE+Na]<sup>+</sup>  
[oxCE+NH<sub>4</sub>]<sup>+</sup>  
[oxCE+H]<sup>+</sup>

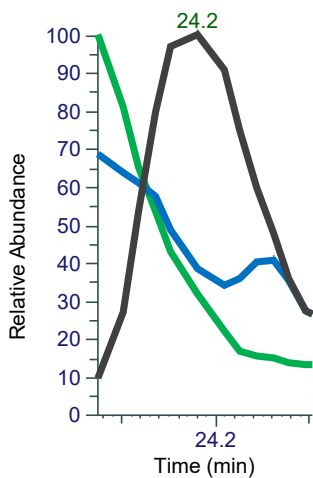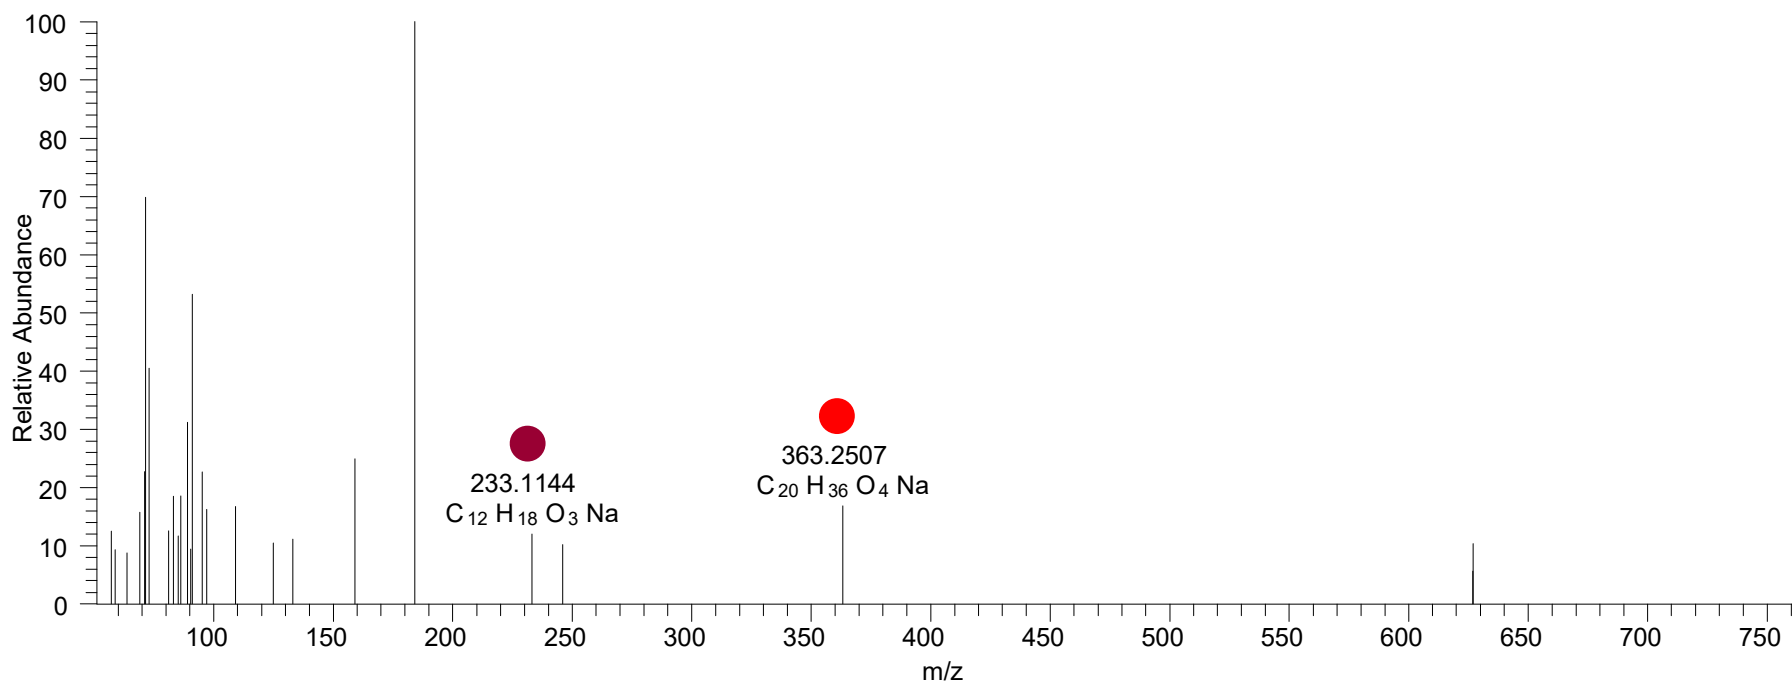

# CE(20:2<2O{15}>) RT 24.4

[oxCE+Na]<sup>+</sup>

XIC 731.5949 NL: 5.13E4

- Fragments containing oxFAs
- Fragments related to water loss
- Fragments not containing oxFAs
- Position-specific fragments
- Fragments related to other oxLPPs

[oxCE+Na]<sup>+</sup>  
[oxCE+NH<sub>4</sub>]<sup>+</sup>  
[oxCE+H]<sup>+</sup>

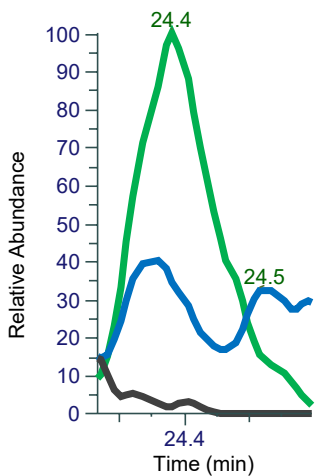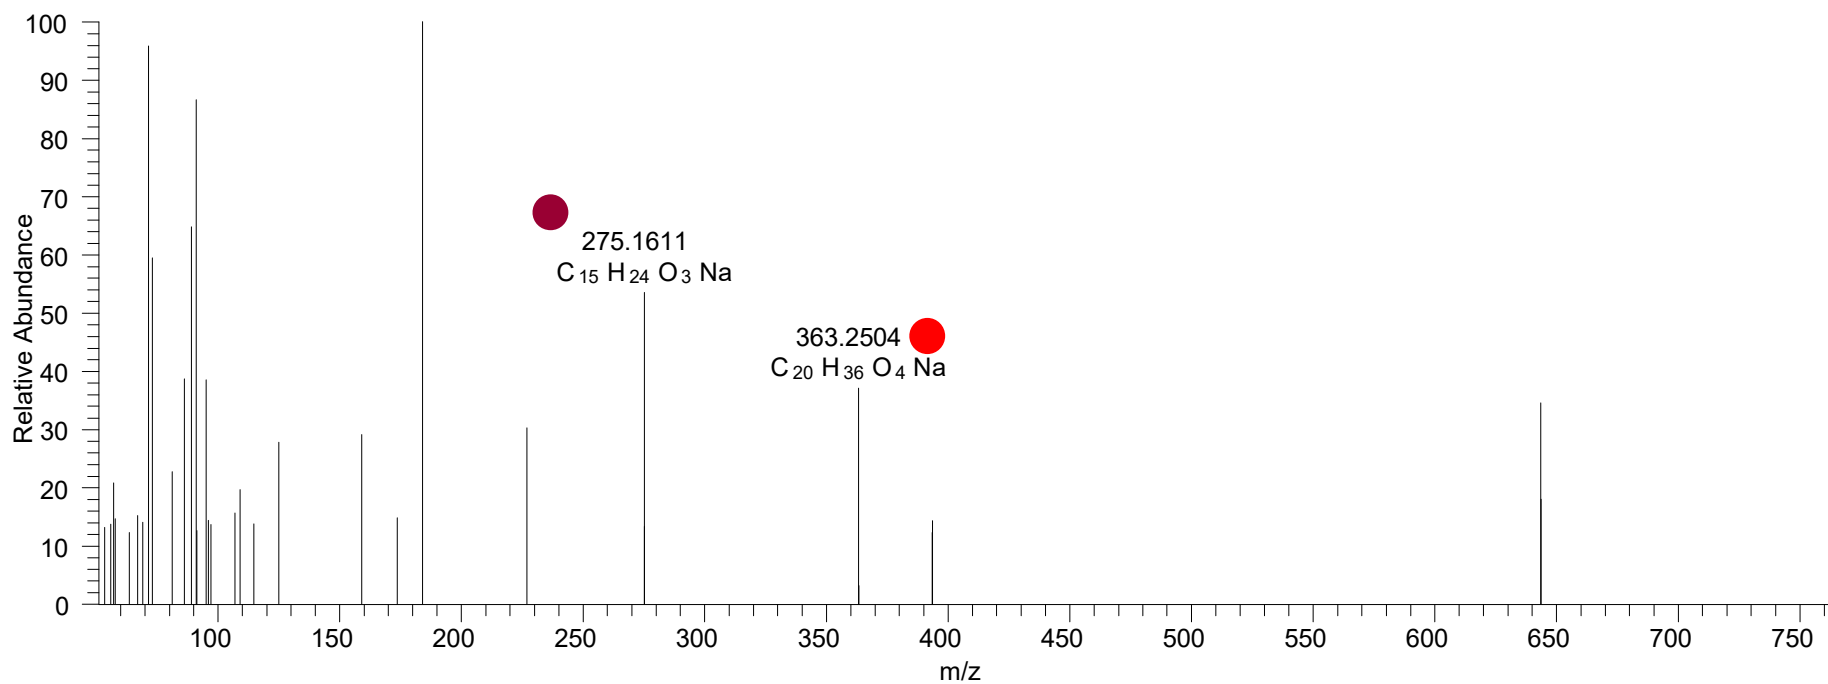

# CE(22:6<OH>) RT 23.4

[oxCE+Na]<sup>+</sup>

XIC 735.5687 NL: 4.31E5

- Fragments containing oxFAs
- Fragments related to water loss
- Fragments not containing oxFAs
- Position-specific fragments
- Fragments related to other oxLPPs

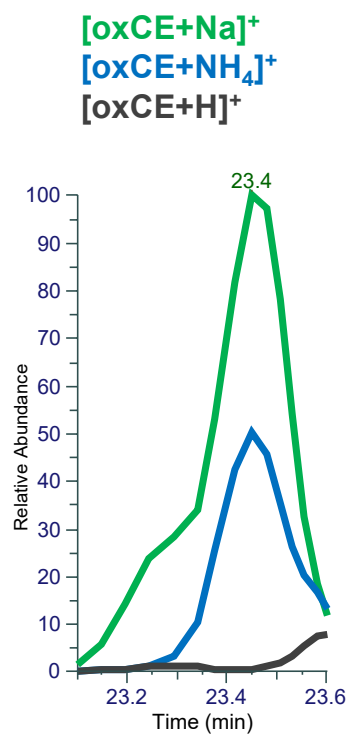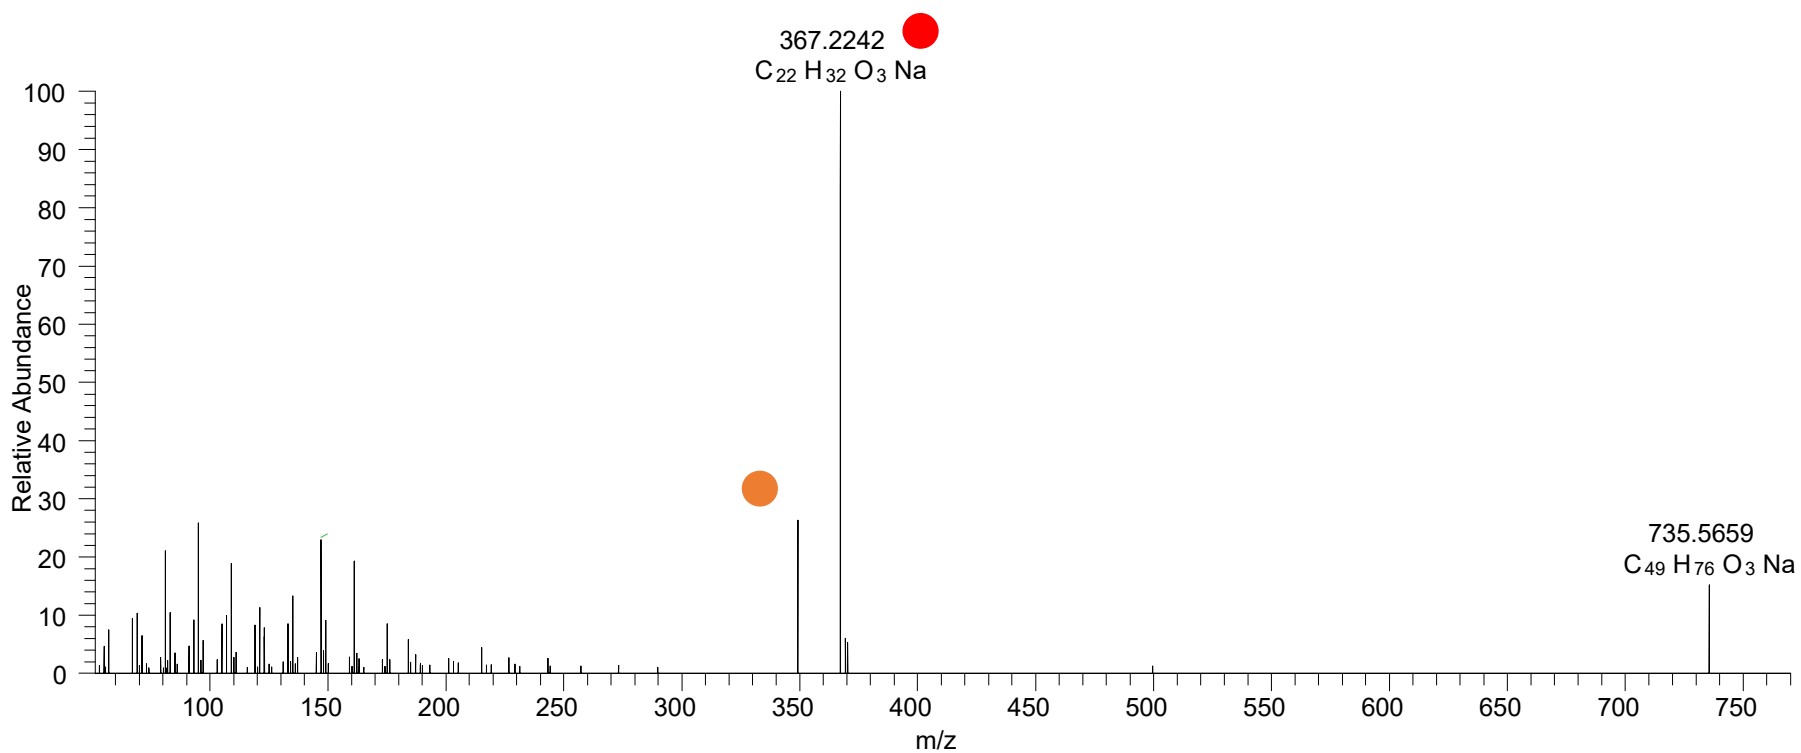

# CE(20:5<2OH,O>) RT 18.1

[oxCE+Na]<sup>+</sup>

XIC 741.5428 NL: 6.17E4

- Fragments containing oxFAs
- Fragments related to water loss
- Fragments not containing oxFAs
- Position-specific fragments
- Fragments related to other oxLPPs

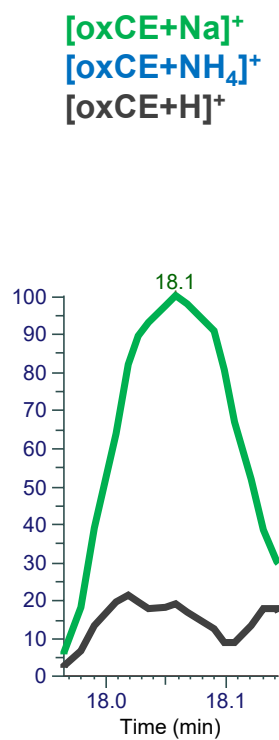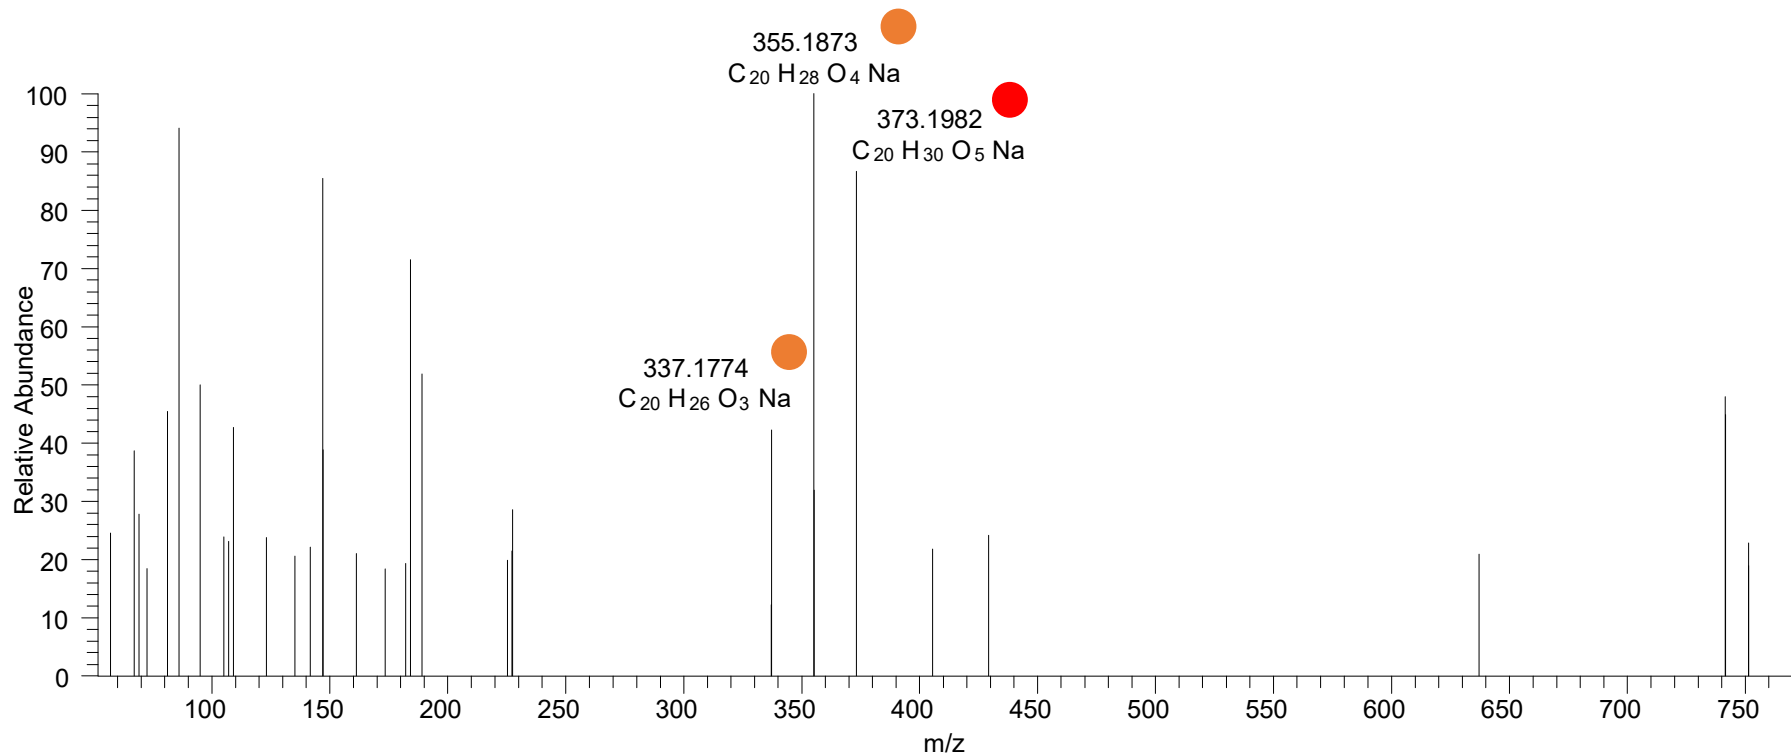



# CE(20:5<2OH,O>) RT 19.3

[oxCE+Na]<sup>+</sup>

XIC 741.5428 NL: 1.13E5

- Fragments containing oxFAs
- Fragments related to water loss
- Fragments not containing oxFAs
- Position-specific fragments
- Fragments related to other oxLPPs

[oxCE+Na]<sup>+</sup>  
[oxCE+NH<sub>4</sub>]<sup>+</sup>  
[oxCE+H]<sup>+</sup>

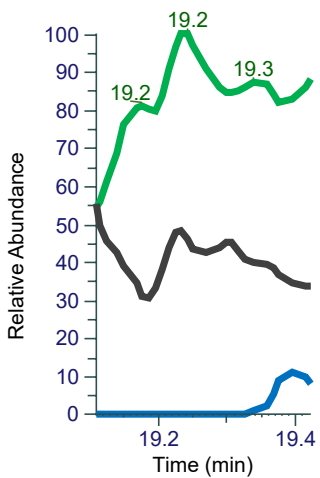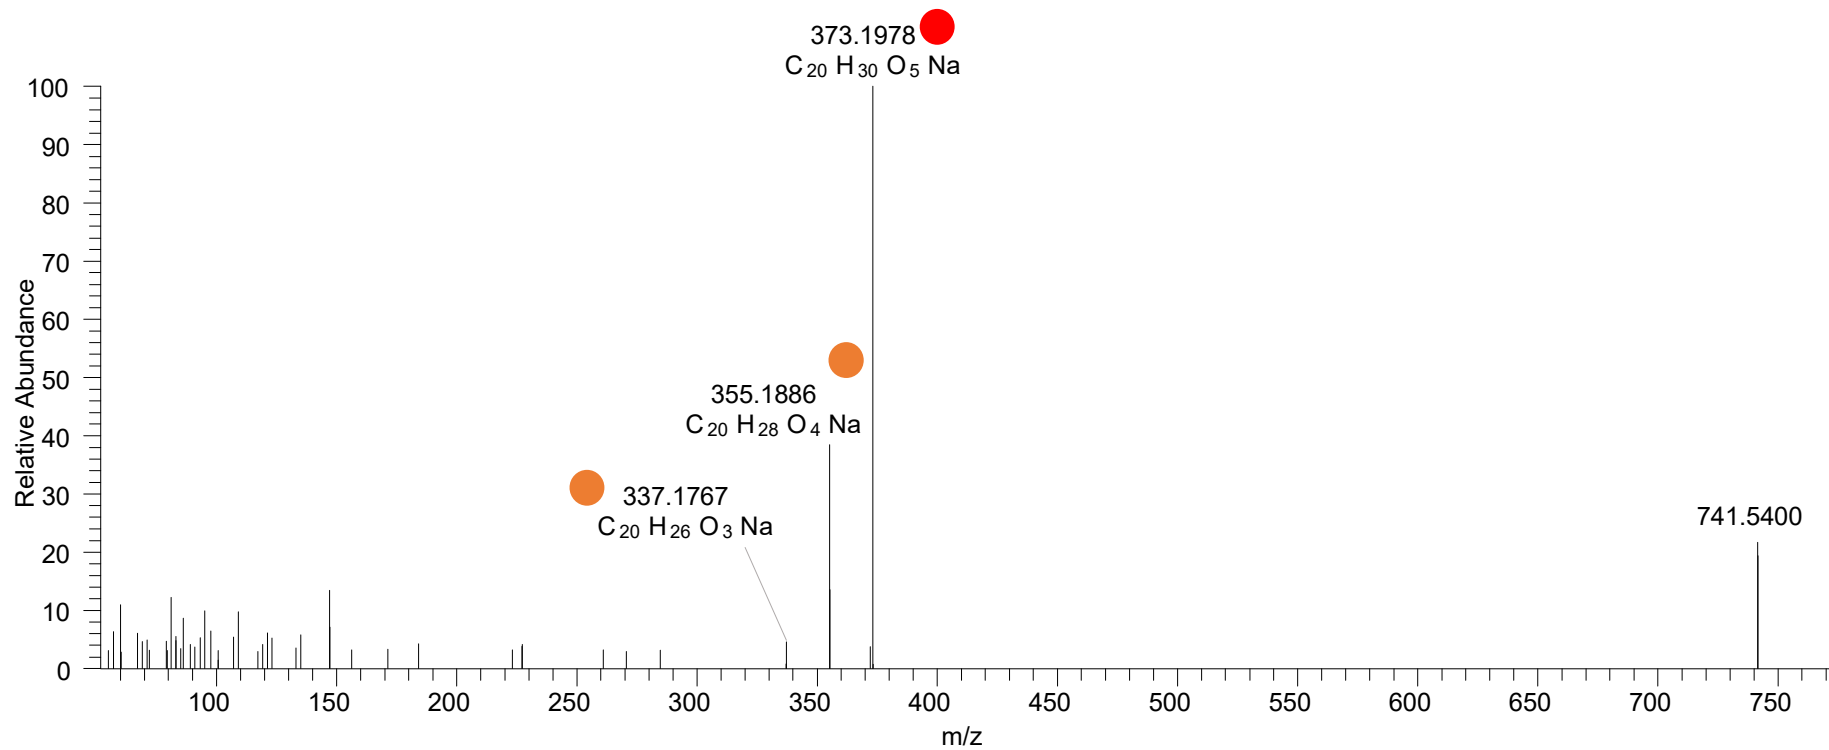

CE(20:5<O,OOH{15}>)  
CE(20:5<O,OOH{9}>)  
RT 20.2

[oxCE+Na]<sup>+</sup>

XIC 741.5428 NL: 1.13E5

- Fragments containing oxFAs
- Fragments related to water loss
- Fragments not containing oxFAs
- Position-specific fragments
- Fragments related to other oxLPPs

[oxCE+Na]<sup>+</sup>  
[oxCE+NH<sub>4</sub>]<sup>+</sup>  
[oxCE+H]<sup>+</sup>

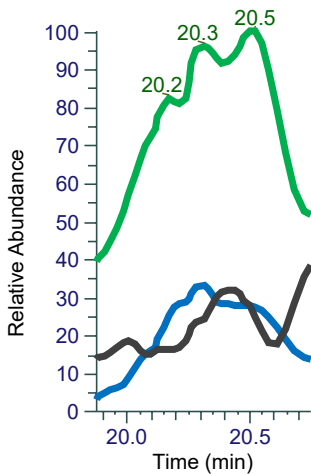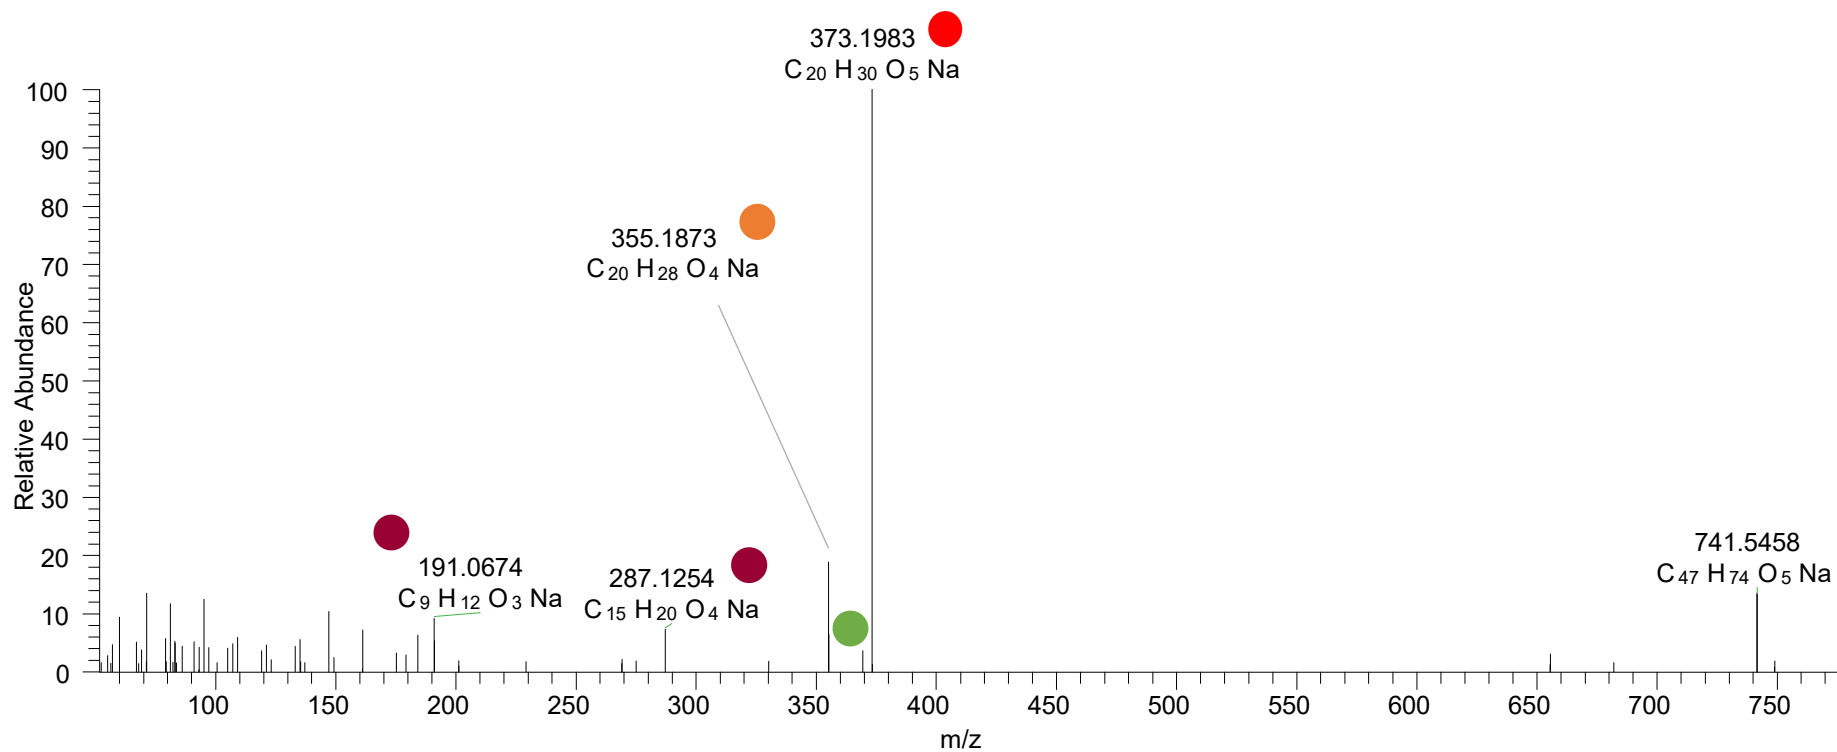

# CE(20:5<OH,OOH{15}>) RT 20.5

[oxCE+Na]<sup>+</sup>

XIC 741.5428 NL: 1.13E5

- Fragments containing oxFAs
- Fragments related to water loss
- Fragments not containing oxFAs
- Position-specific fragments
- Fragments related to other oxLPPs

[oxCE+Na]<sup>+</sup>  
[oxCE+NH<sub>4</sub>]<sup>+</sup>  
[oxCE+H]<sup>+</sup>

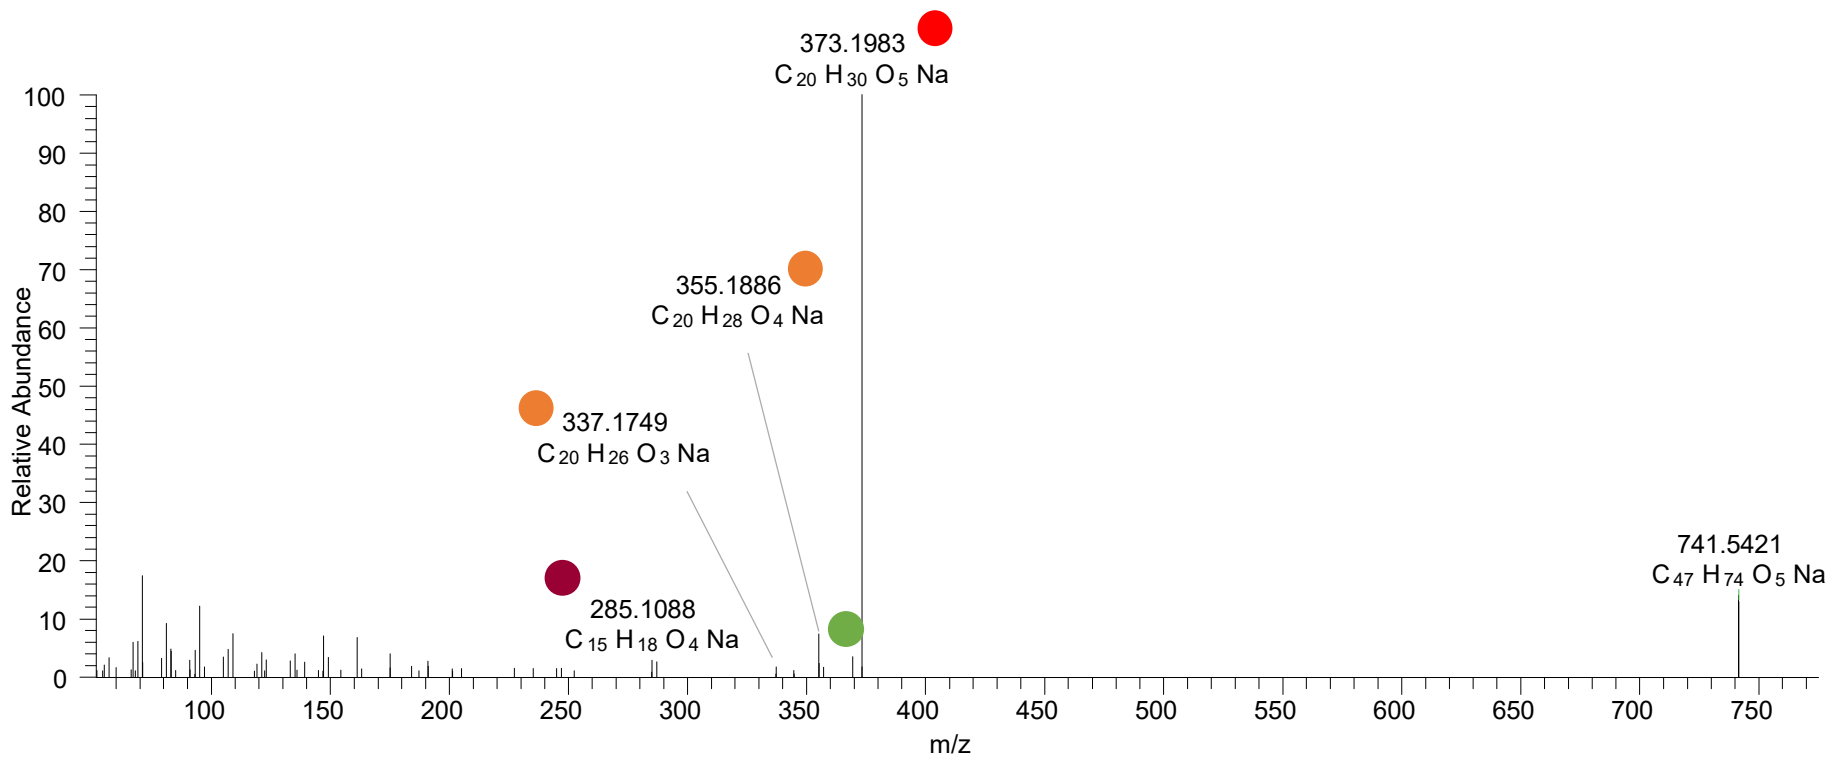

# CE(20:5<OH,2O{14}>) RT 21.1

[oxCE+Na]<sup>+</sup>

XIC 741.5428 NL: 2.59E5

- Fragments containing oxFAs
- Fragments related to water loss
- Fragments not containing oxFAs
- Position-specific fragments
- Fragments related to other oxLPPs

[oxCE+Na]<sup>+</sup>  
[oxCE+NH<sub>4</sub>]<sup>+</sup>  
[oxCE+H]<sup>+</sup>

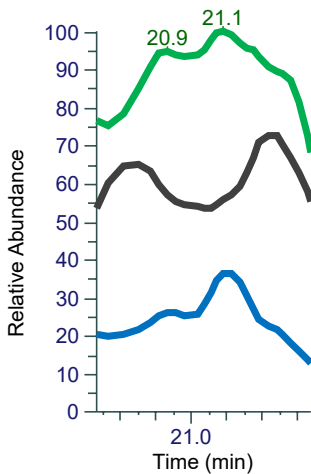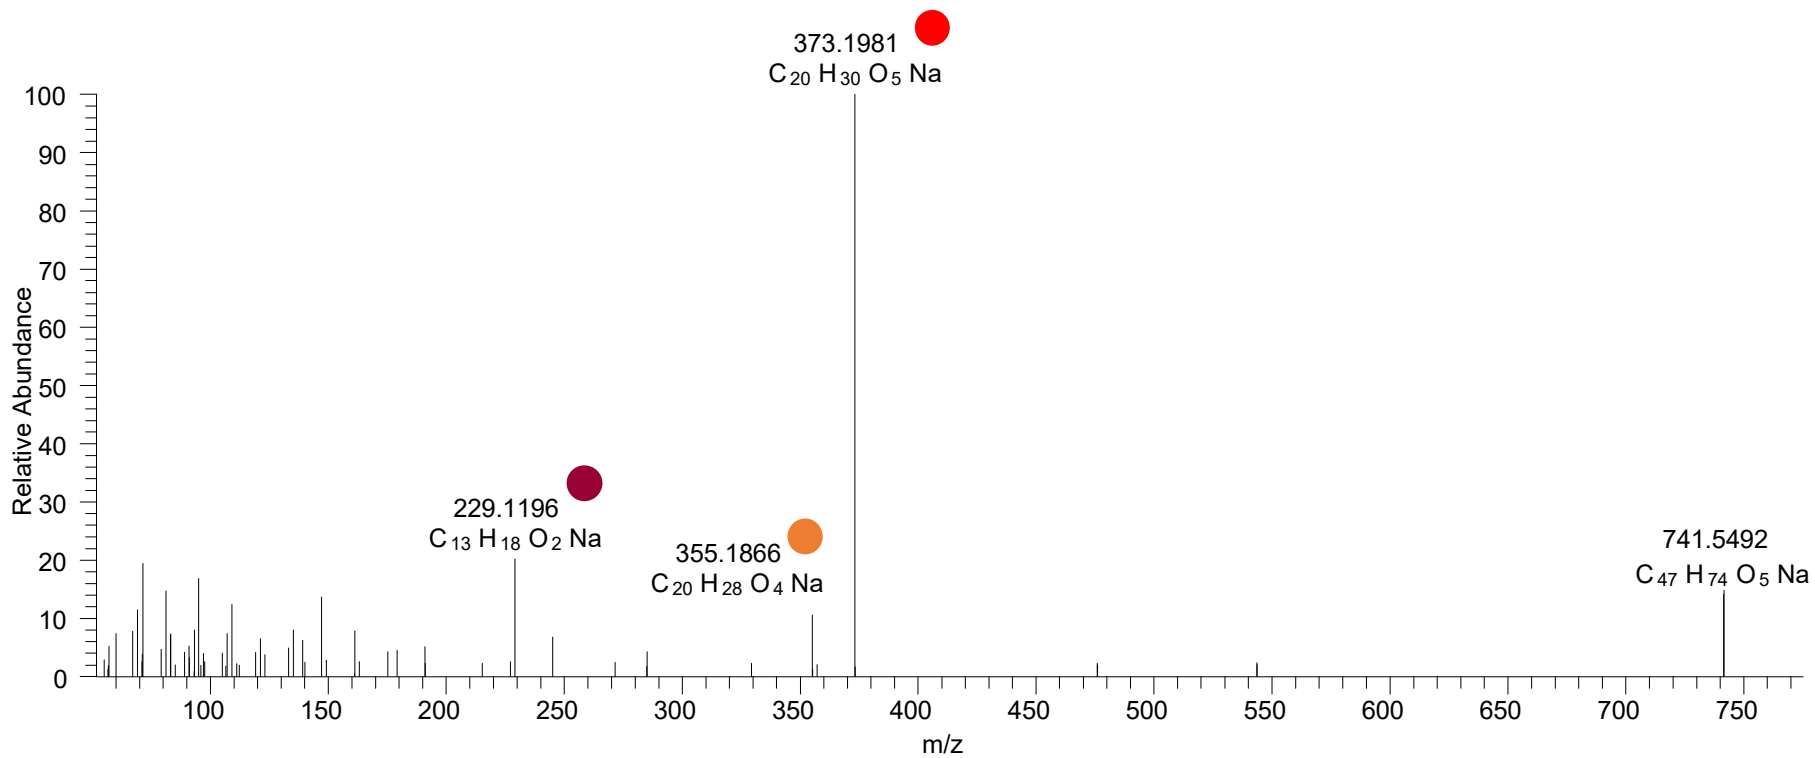

# CE(20:4<oxo,OOH{12}>) RT 21.2

[oxCE+Na]<sup>+</sup>

XIC 741.5428 NL: 2.59E5

- Fragments containing oxFAs
- Fragments related to water loss
- Fragments not containing oxFAs
- Position-specific fragments
- Fragments related to other oxLPPs

[oxCE+Na]<sup>+</sup>  
[oxCE+NH<sub>4</sub>]<sup>+</sup>  
[oxCE+H]<sup>+</sup>

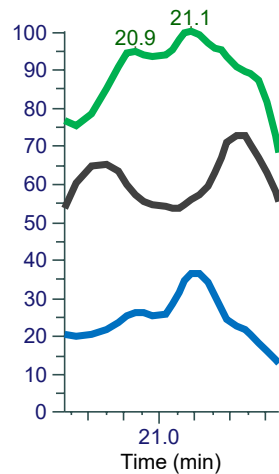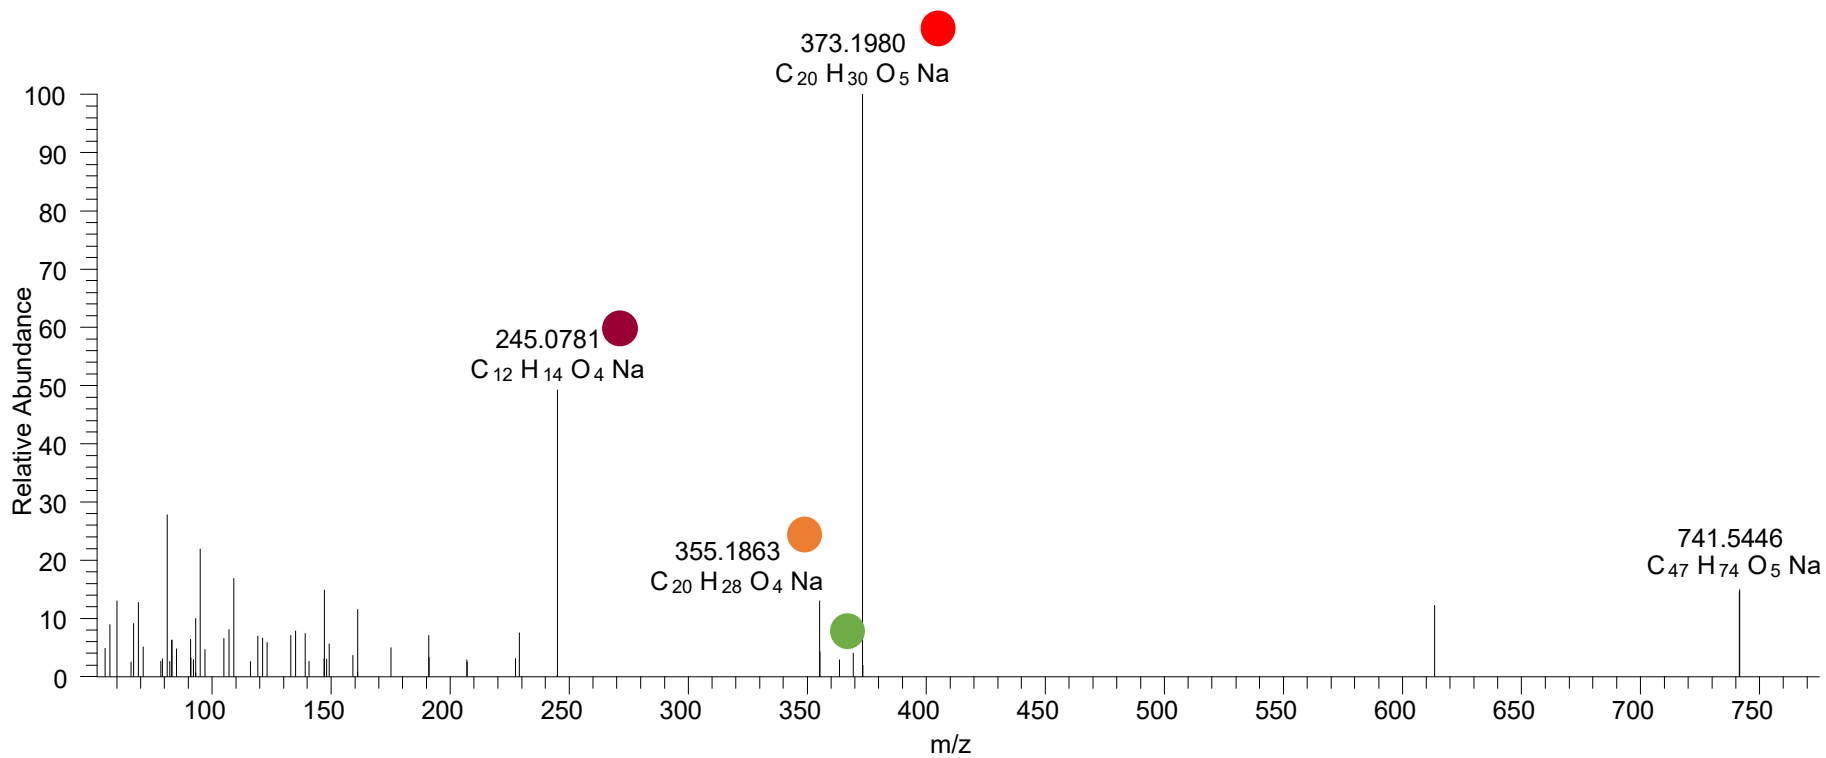

# CE(20:4<2OH,O>) RT 19.5

[oxCE+Na]<sup>+</sup>

XIC 743.5585 NL: 1.52E5

- Fragments containing oxFAs
- Fragments related to water loss
- Fragments not containing oxFAs
- Position-specific fragments
- Fragments related to other oxLPPs

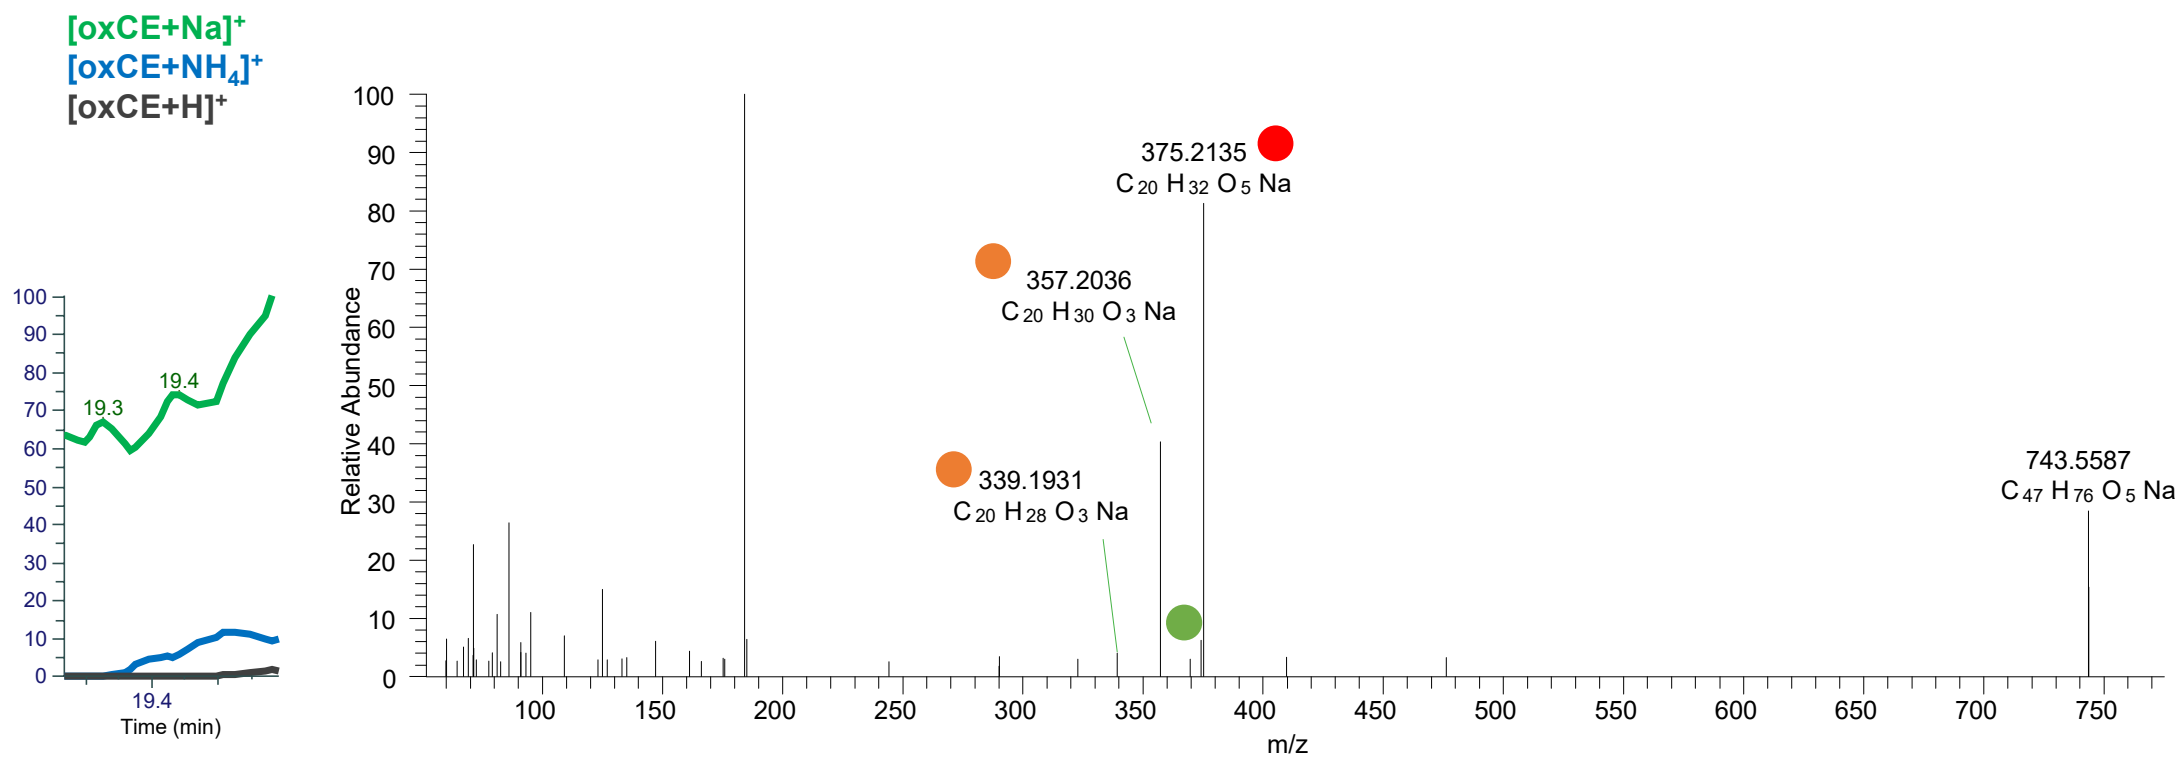

# CE(20:4<OH,2O>) RT 20.0

[oxCE+Na]<sup>+</sup>

XIC 743.5585 NL: 6.33E5

- Fragments containing oxFAs
- Fragments related to water loss
- Fragments not containing oxFAs
- Position-specific fragments
- Fragments related to other oxLPPs

[oxCE+Na]<sup>+</sup>  
[oxCE+NH<sub>4</sub>]<sup>+</sup>  
[oxCE+H]<sup>+</sup>

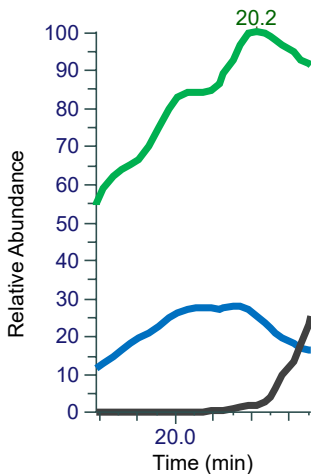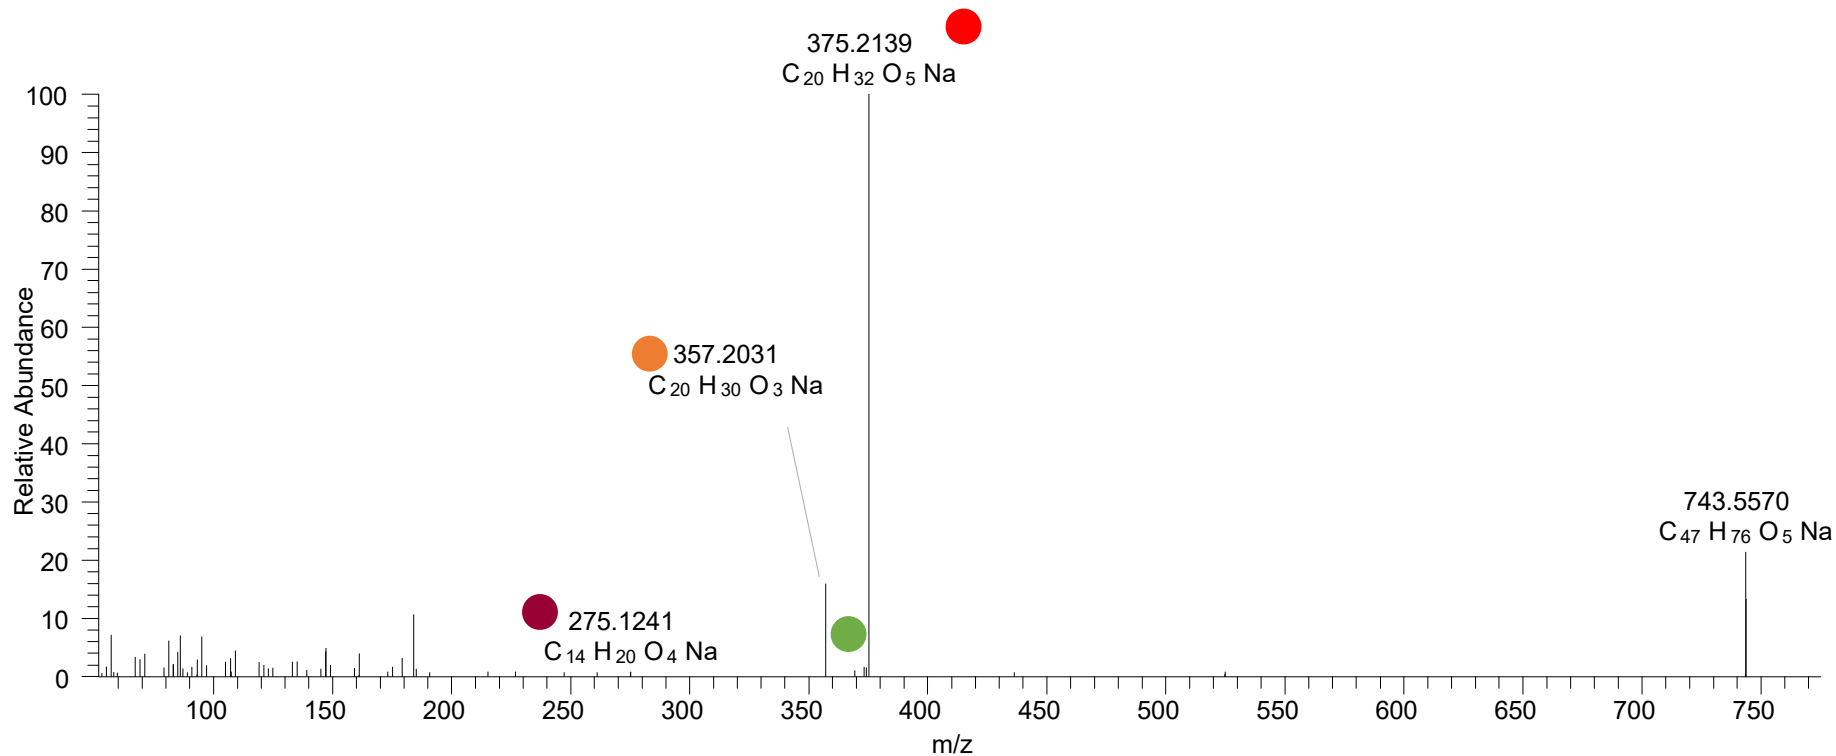

# CE(20:4<OH,OOH{15}>) RT 20.2

[oxCE+Na]<sup>+</sup>

XIC 743.5585 NL: 6.33E5

- Fragments containing oxFAs
- Fragments related to water loss
- Fragments not containing oxFAs
- Position-specific fragments
- Fragments related to other oxLPPs

[oxCE+Na]<sup>+</sup>  
[oxCE+NH<sub>4</sub>]<sup>+</sup>  
[oxCE+H]<sup>+</sup>

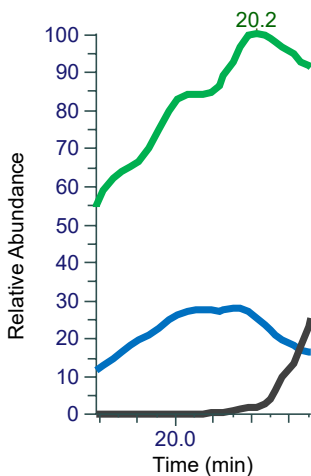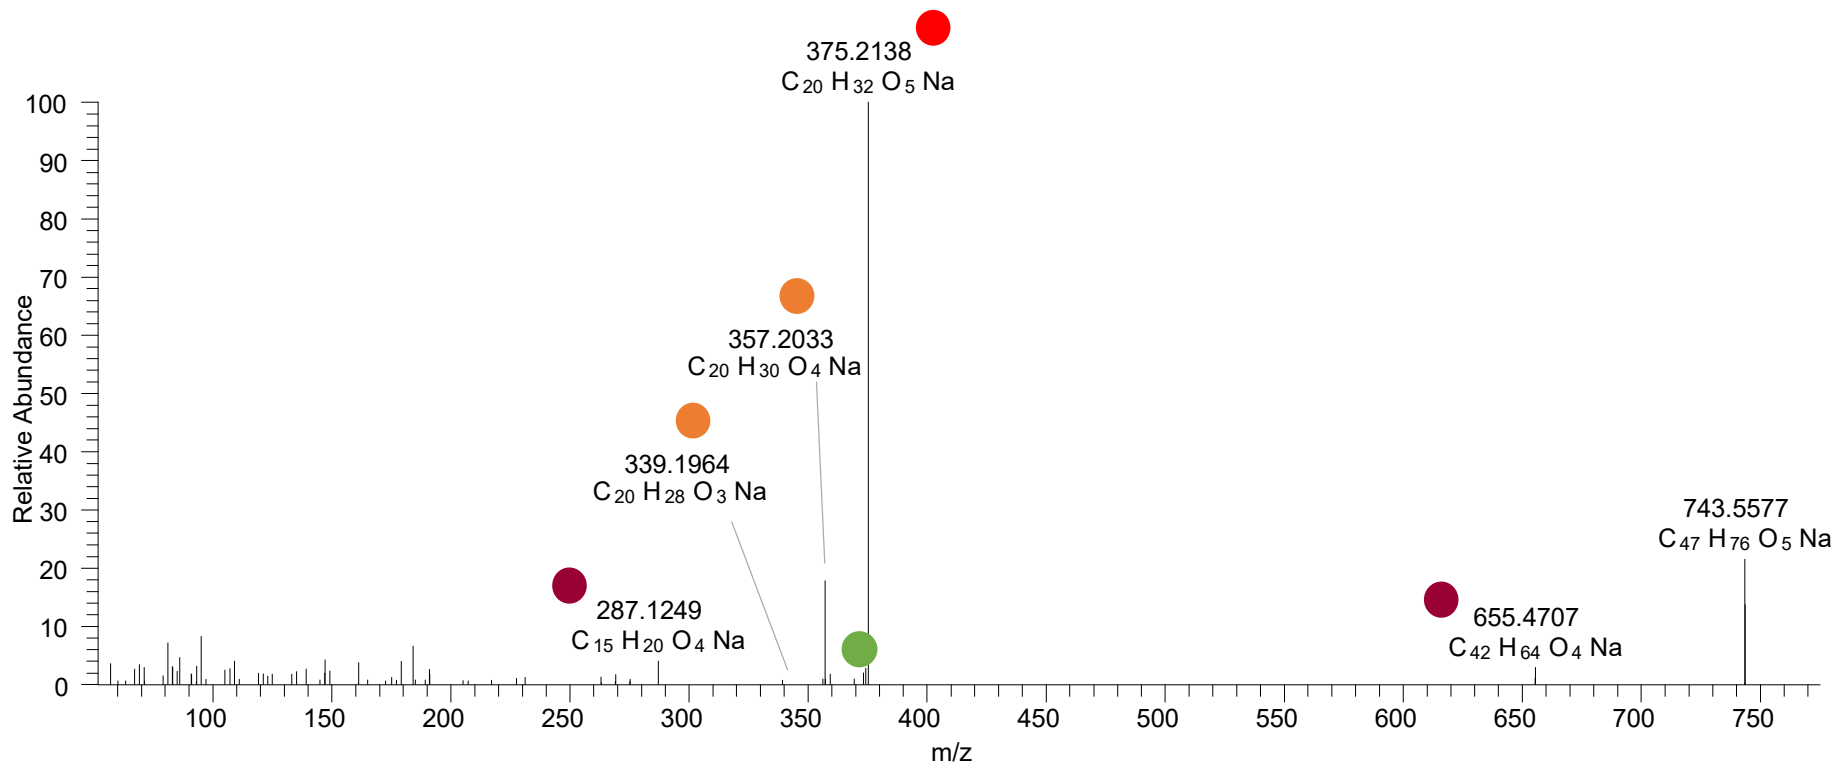



CE(20:4<OH,OOH{15}>)  
 CE(20:4<OH,OOH{12}>)  
 CE(20:4<OH,OOH{9}>)  
 RT 20.7

[oxCE+Na]<sup>+</sup>

XIC 743.5585 NL: 1.61E6

- Fragments containing oxFAs
- Fragments related to water loss
- Fragments not containing oxFAs
- Position-specific fragments
- Fragments related to other oxLPPs

[oxCE+Na]<sup>+</sup>  
 [oxCE+NH<sub>4</sub>]<sup>+</sup>  
 [oxCE+H]<sup>+</sup>

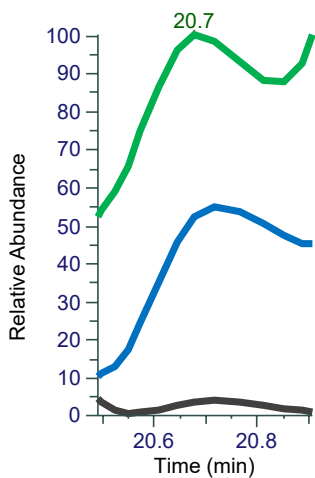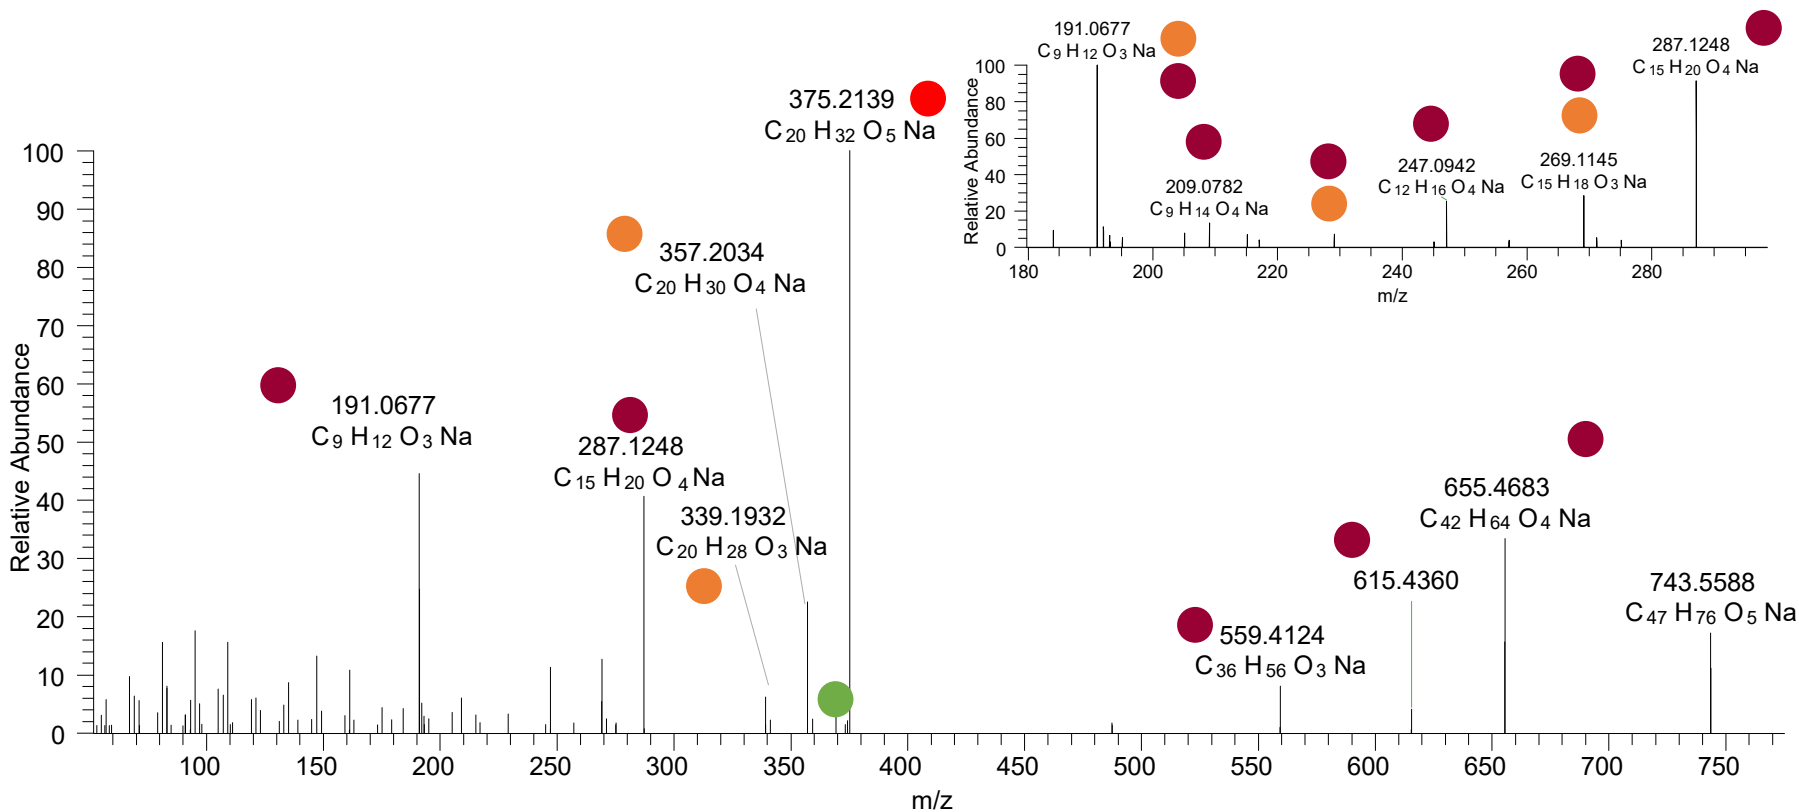

# CE(20:3<ep{11-12},OOH{9}>) RT 21.2

[oxCE+Na]<sup>+</sup>

XIC 743.5585 NL: 1.87E6

- Fragments containing oxFAs
- Fragments related to water loss
- Fragments not containing oxFAs
- Position-specific fragments
- Fragments related to other oxLPPs

[oxCE+Na]<sup>+</sup>  
[oxCE+NH<sub>4</sub>]<sup>+</sup>  
[oxCE+H]<sup>+</sup>

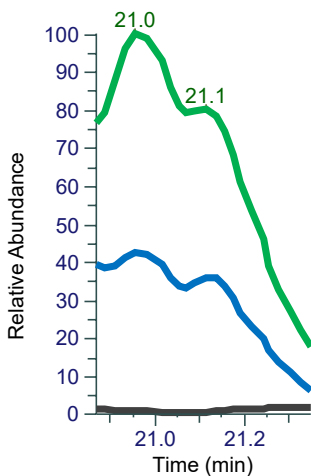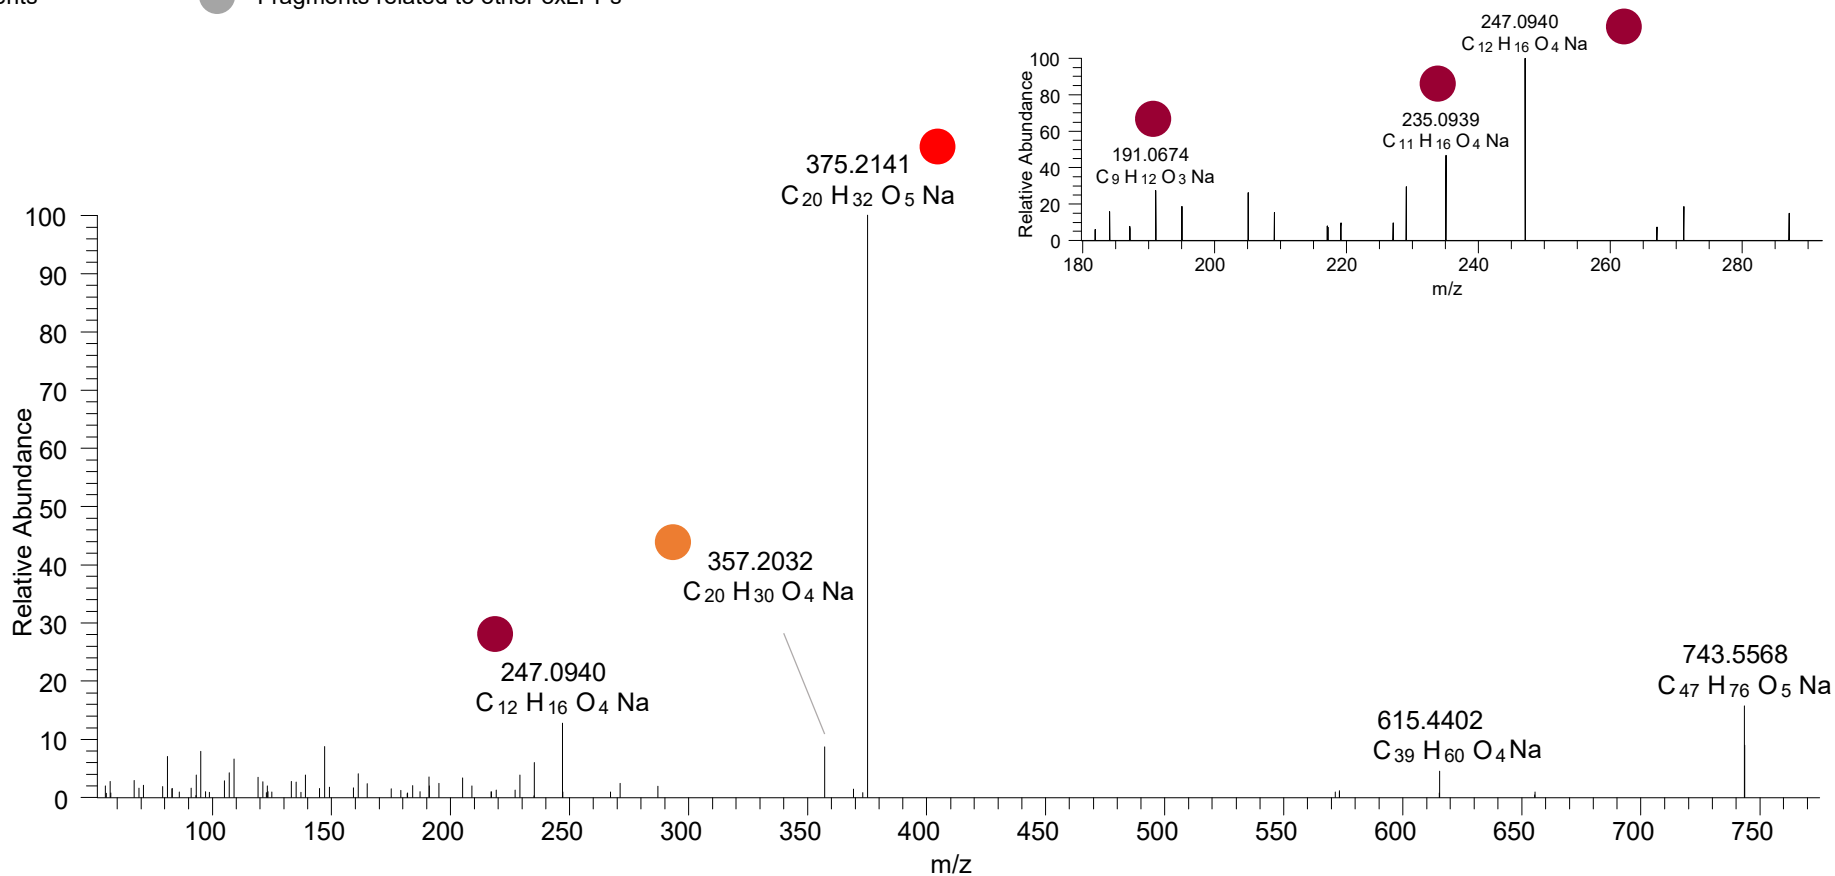

CE(20:3<ep,OOH{16}>)  
 CE(20:3<ep,OOH{15}>)  
 CE(20:3<ep,OOH{11}>)  
 CE(20:3<ep,OOH{9}>)  
 RT 21.5

[oxCE+Na]<sup>+</sup>

XIC 743.5585 NL: 4.81E5

- Fragments containing oxFAs
- Fragments related to water loss
- Fragments not containing oxFAs
- Position-specific fragments
- Fragments related to other oxLPPs

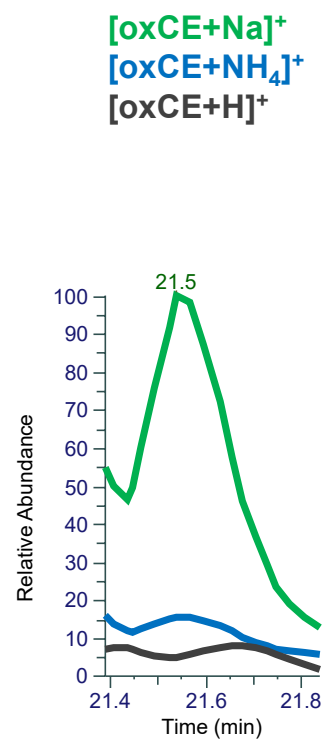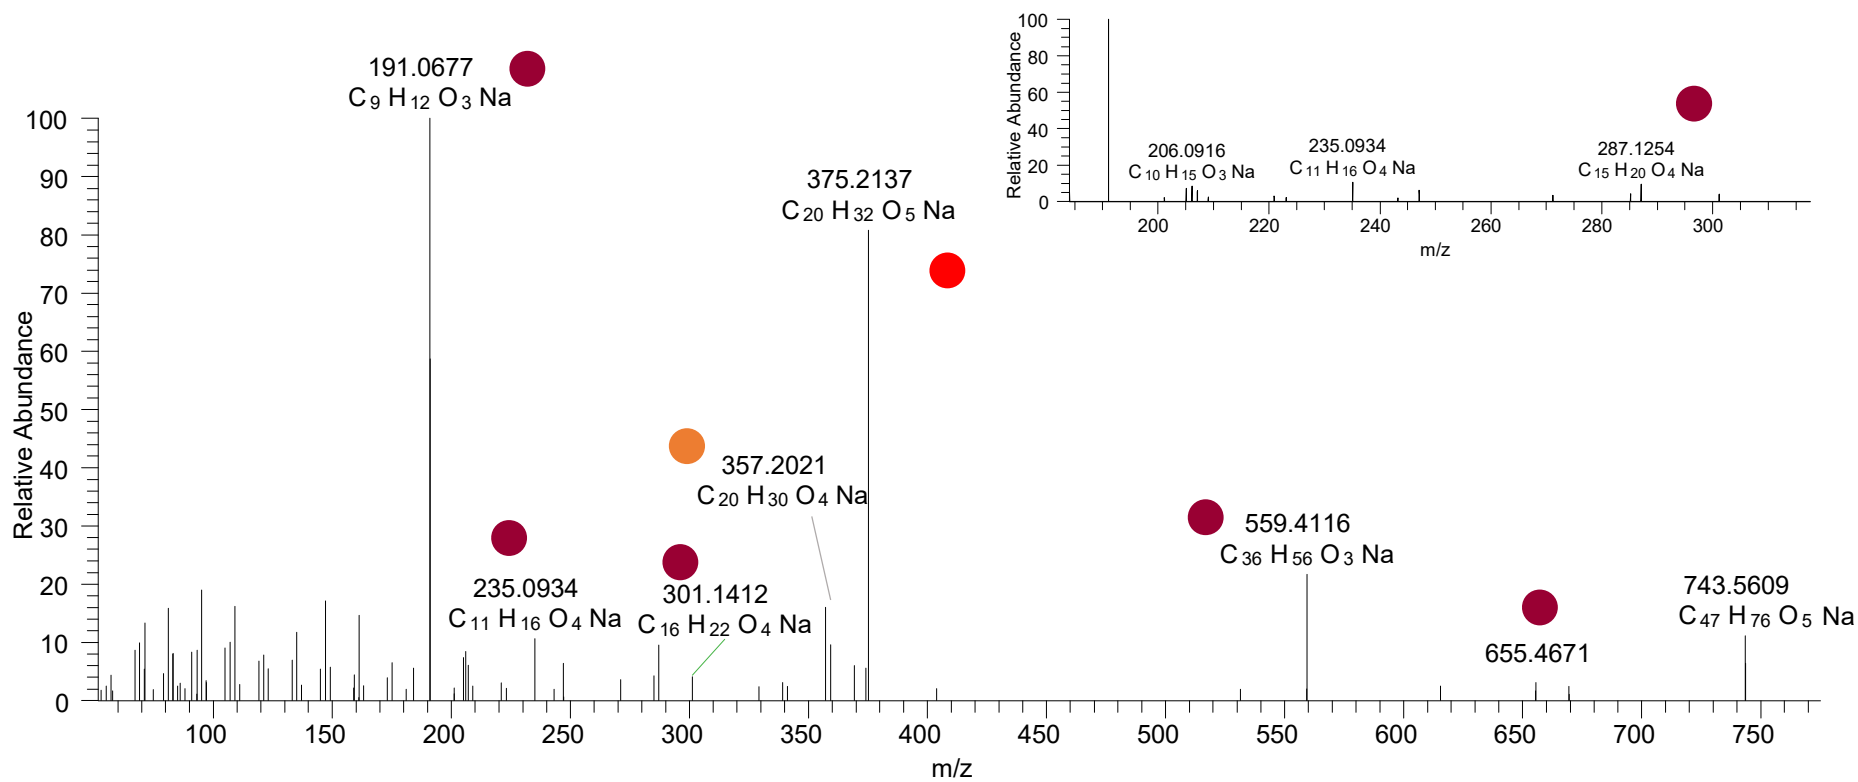

# CE(20:3<oxo,OOH{12}>) CE(20:3<oxo,OOH{15}>) RT 22.1

[oxCE+Na]<sup>+</sup>

XIC 743.5585 NL: 1.51E5

- Fragments containing oxFAs
- Fragments related to water loss
- Fragments not containing oxFAs
- Position-specific fragments
- Fragments related to other oxLPPs

[oxCE+Na]<sup>+</sup>  
[oxCE+NH<sub>4</sub>]<sup>+</sup>  
[oxCE+H]<sup>+</sup>

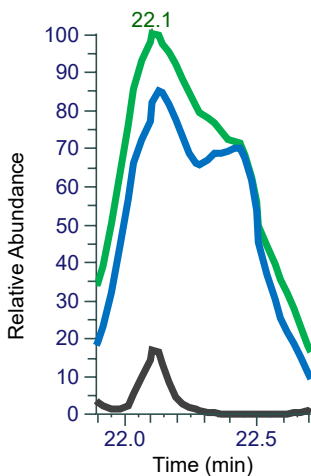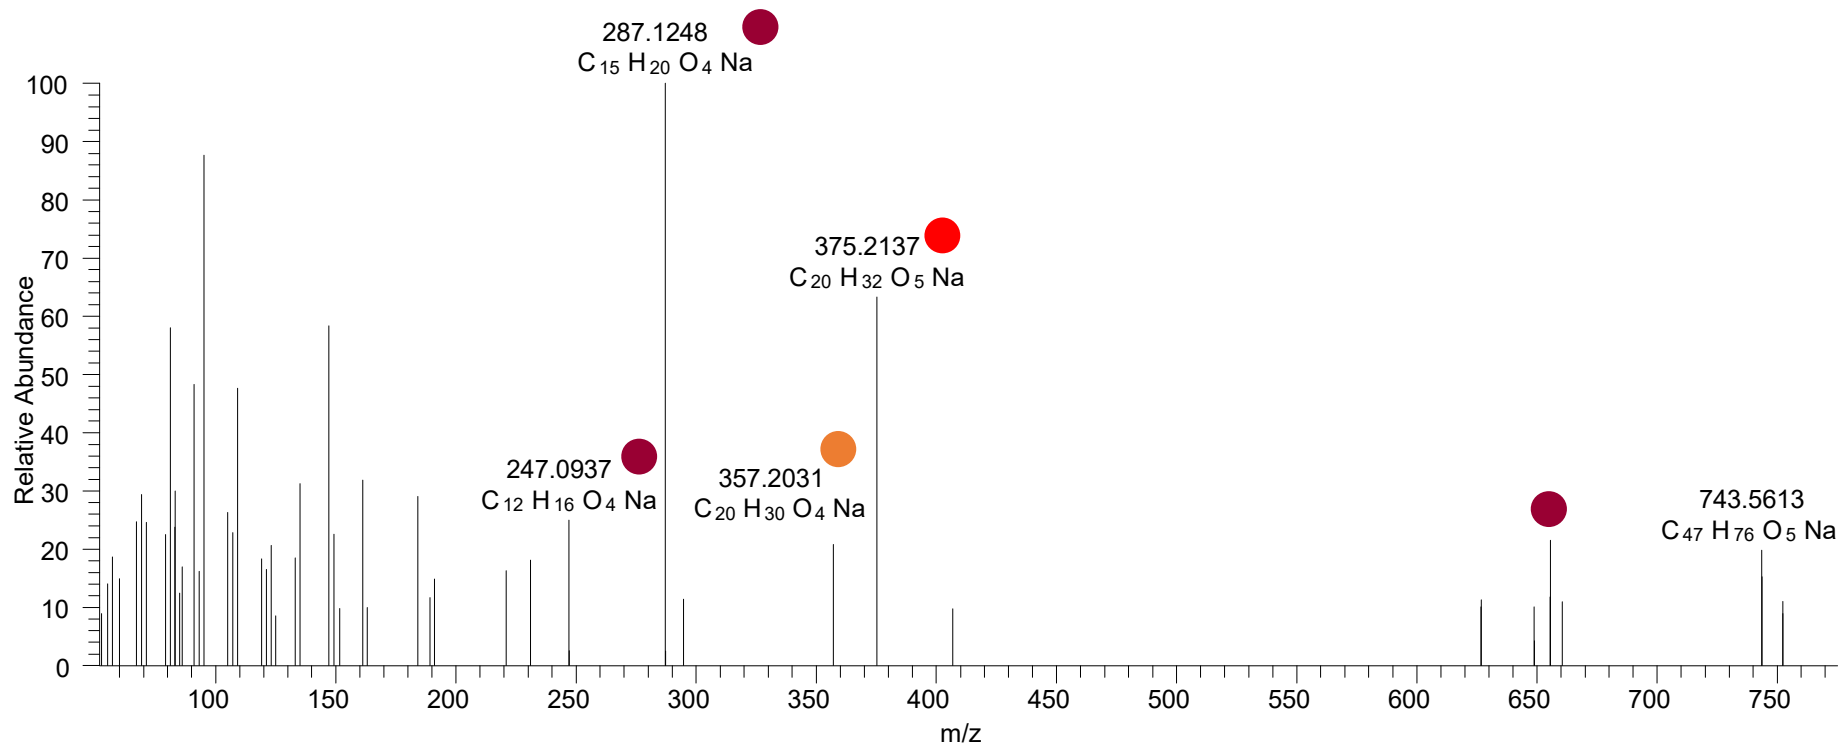

# CE(20:2<ep,2O>) RT 20.7

[oxCE+Na]<sup>+</sup>

XIC 745.5741 NL: 3.39E4

- Fragments containing oxFAs
- Fragments related to water loss
- Fragments not containing oxFAs
- Position-specific fragments
- Fragments related to other oxLPPs

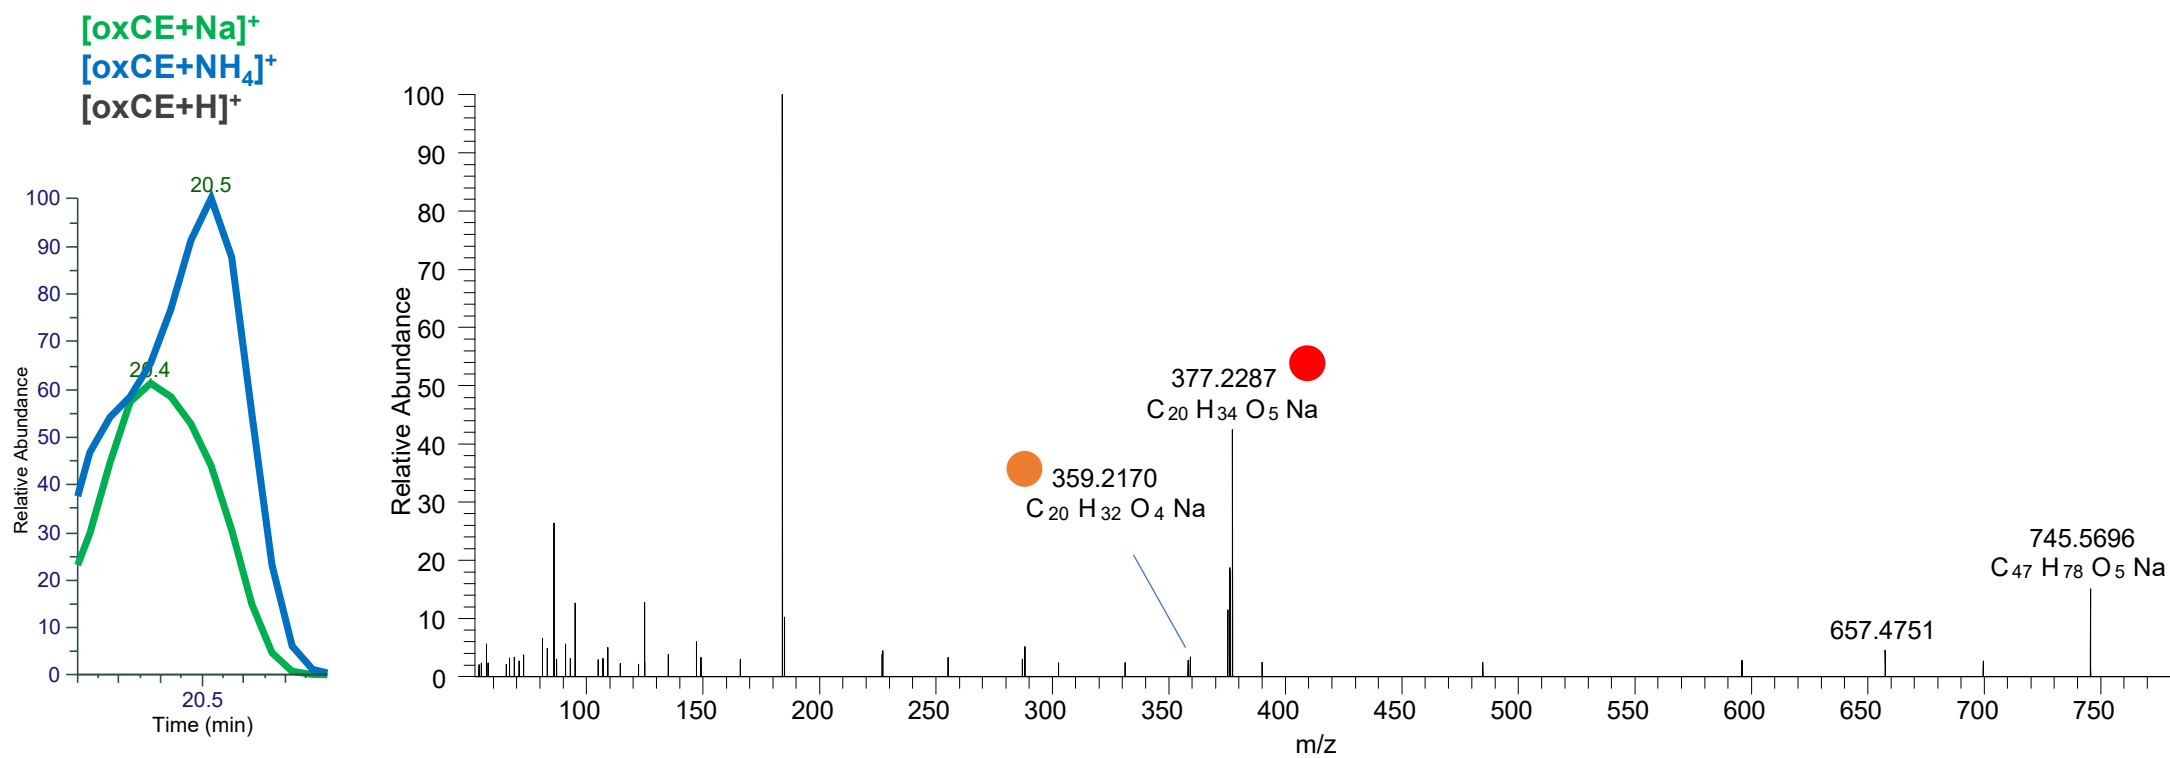

# CE(20:3<OOH{13},O>) RT 21.4

[oxCE+Na]<sup>+</sup>

XIC 745.5741 NL: 7.81E4

- Fragments containing oxFAs
- Fragments related to water loss
- Fragments not containing oxFAs
- Position-specific fragments
- Fragments related to other oxLPPs

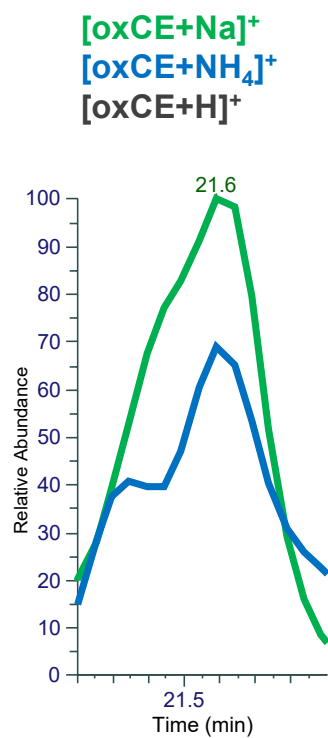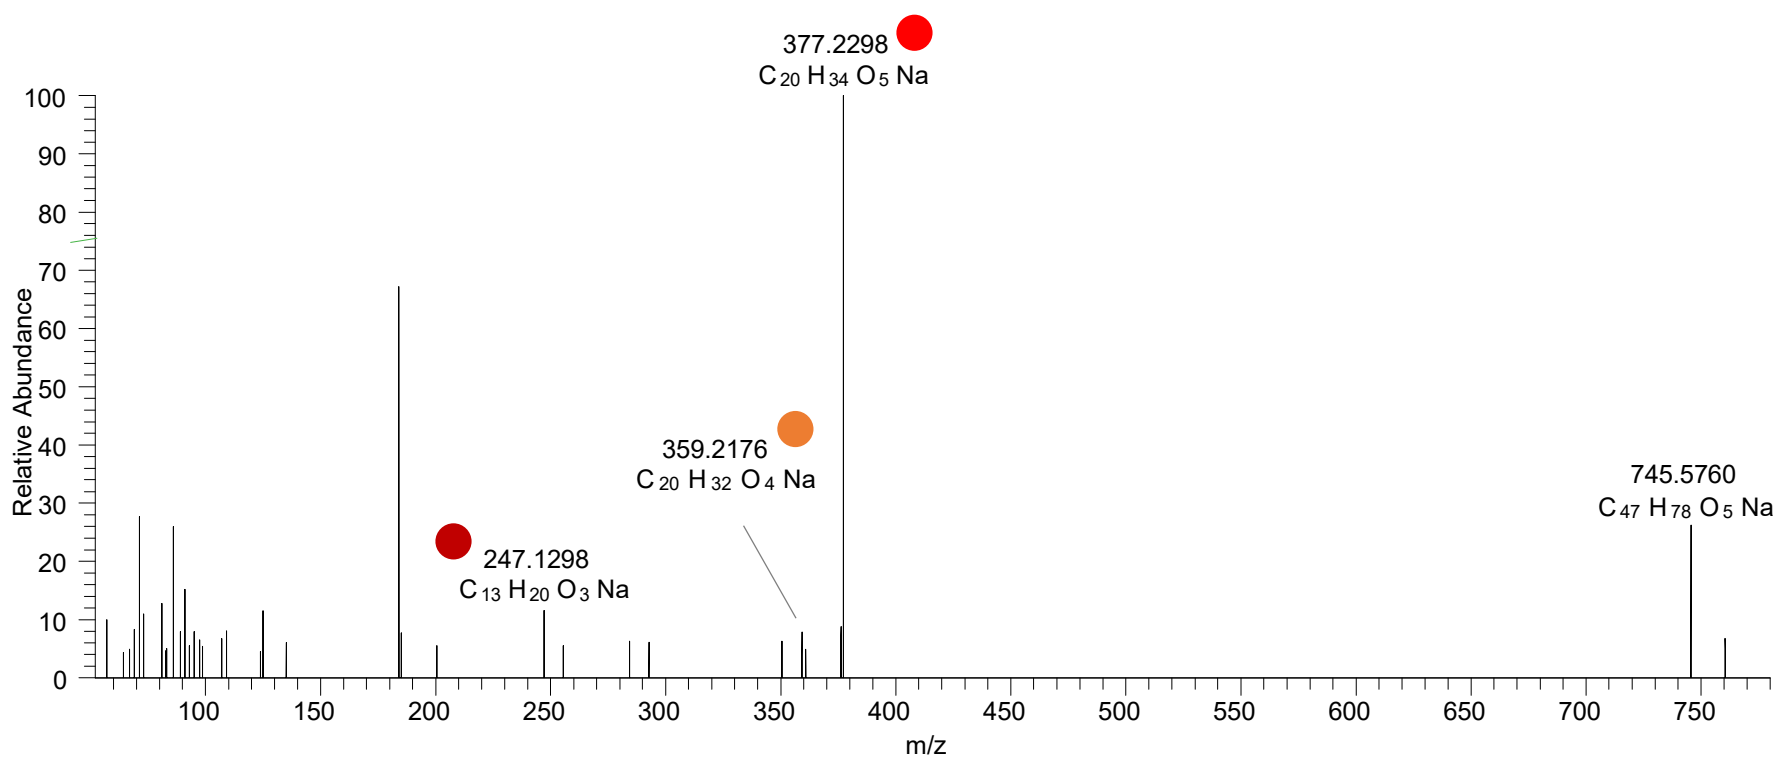

# CE(22:6<2OH>) RT 20.7

[oxCE+Na]<sup>+</sup>

XIC 751.5636 NL: 1.87E5

- Fragments containing oxFAs
- Fragments related to water loss
- Fragments not containing oxFAs
- Position-specific fragments
- Fragments related to other oxLPPs

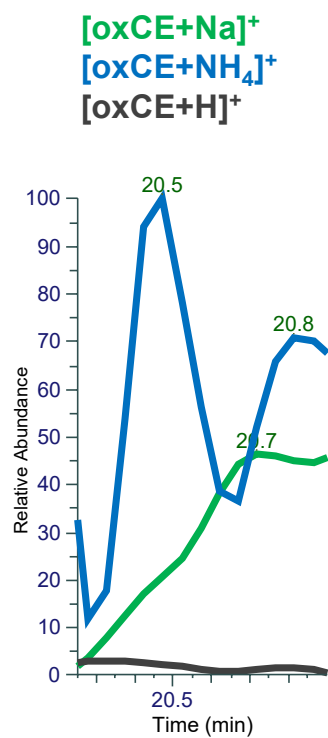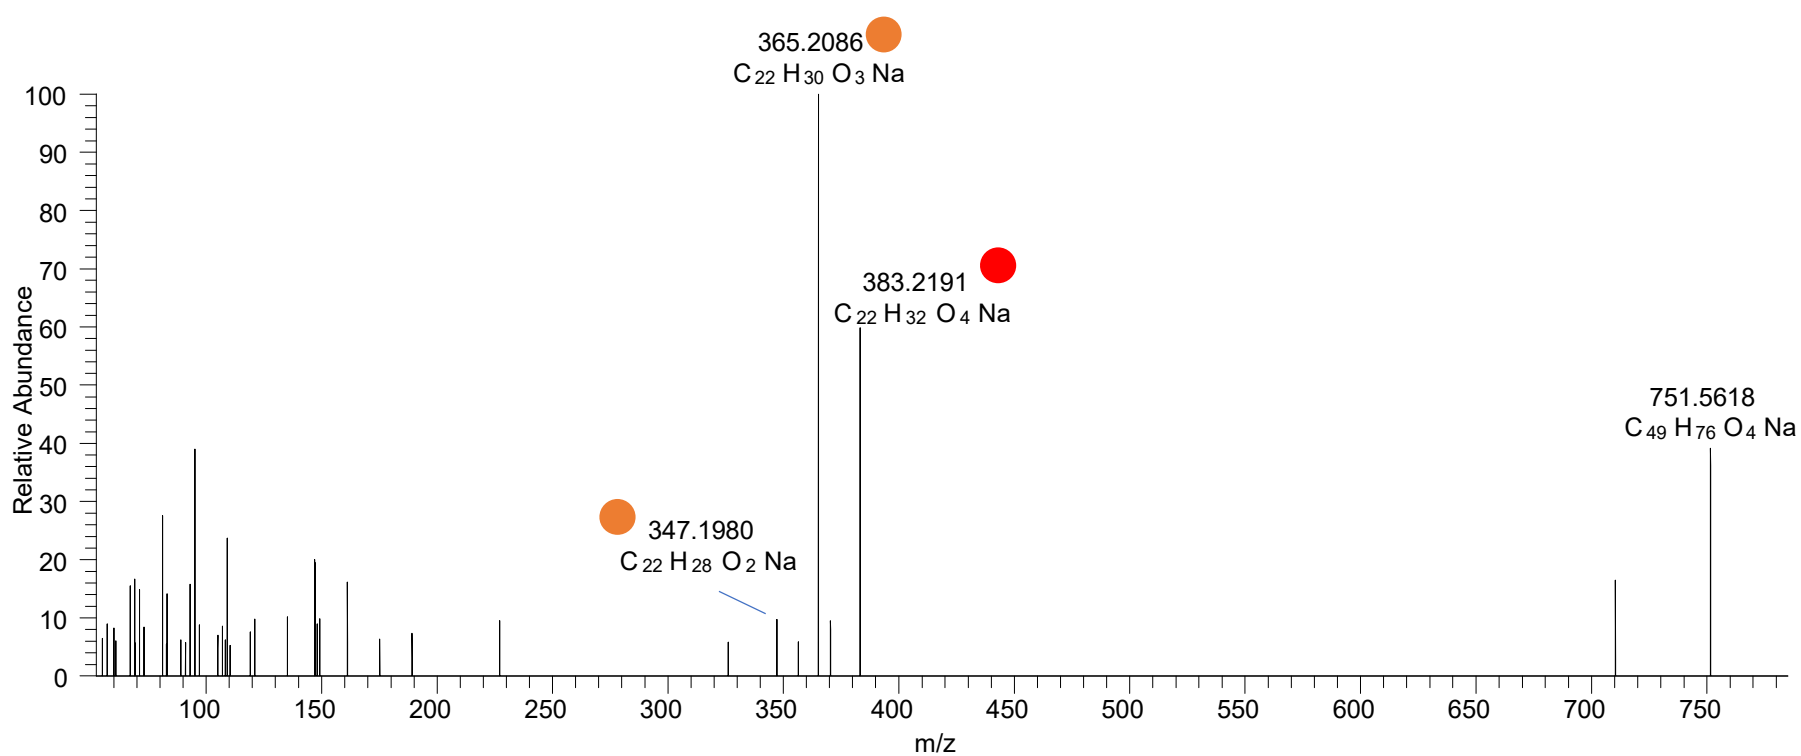

# CE(22:5<oxo,OH>) RT 21.5-21.9

[oxCE+Na]<sup>+</sup>

XIC 751.5636 NL: 7.06E4

- Fragments containing oxFAs
- Fragments related to water loss
- Fragments not containing oxFAs
- Position-specific fragments
- Fragments related to other oxLPPs

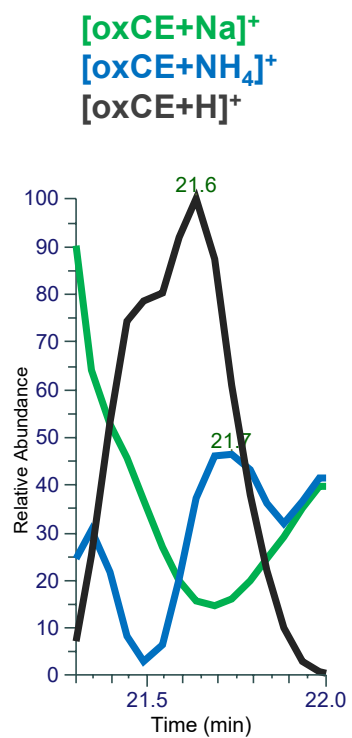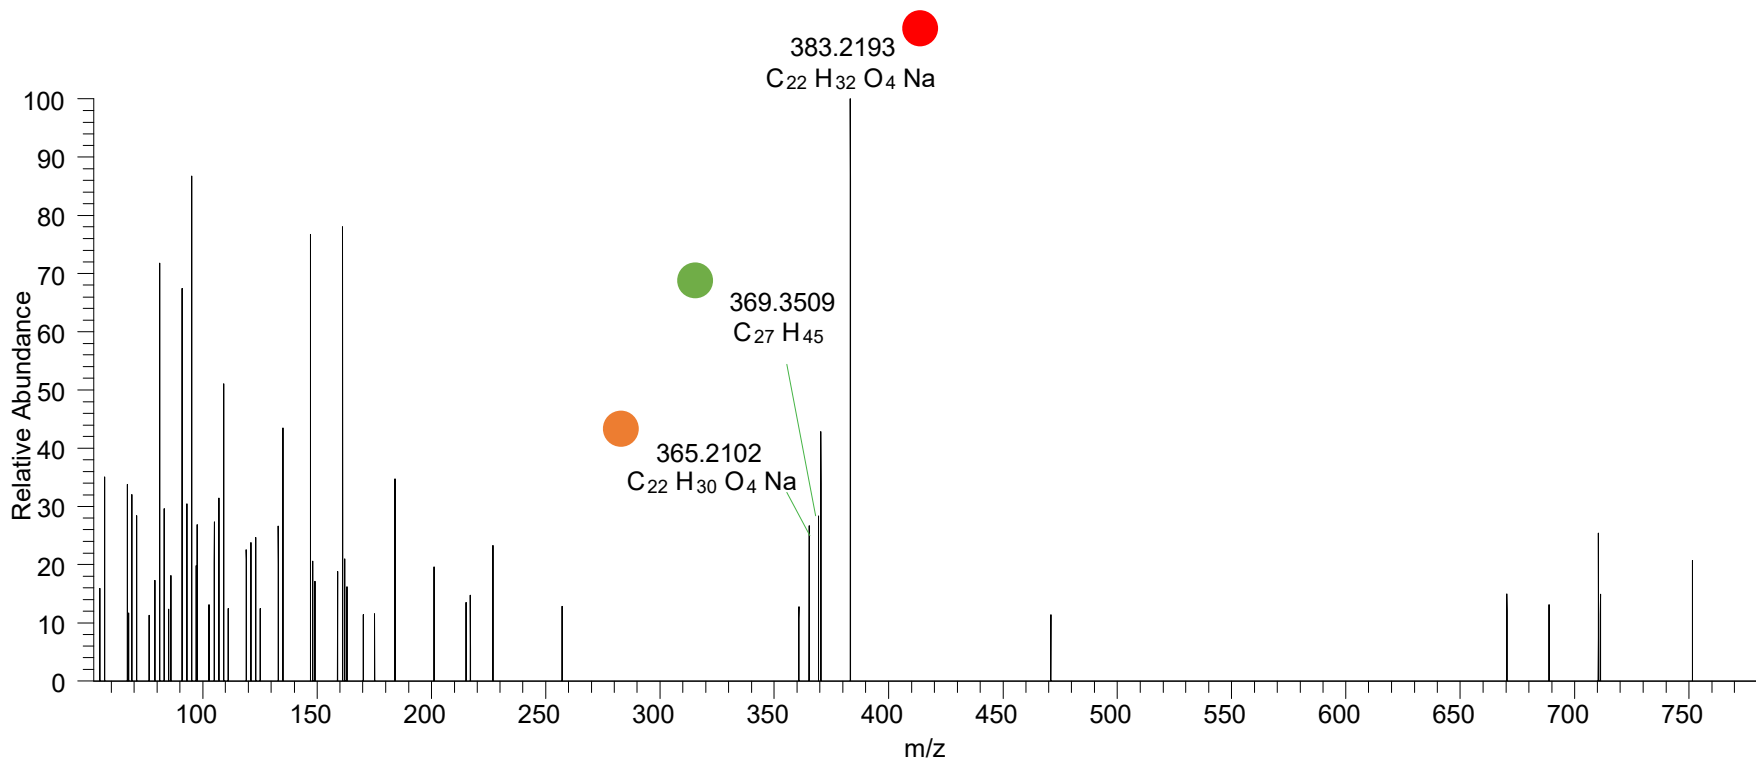



CE(22:6<OOH{8}>)  
 CE(22:6<OOH{11}>)  
 CE(22:6<OOH{14}>)  
 CE(22:6<OOH{17}>)  
 RT 23.3

[oxCE+Na]<sup>+</sup>

XIC 751.5636 NL: 2.27E5

- Fragments containing oxFAs
- Fragments related to water loss
- Fragments not containing oxFAs
- Position-specific fragments
- Fragments related to other oxLPPs

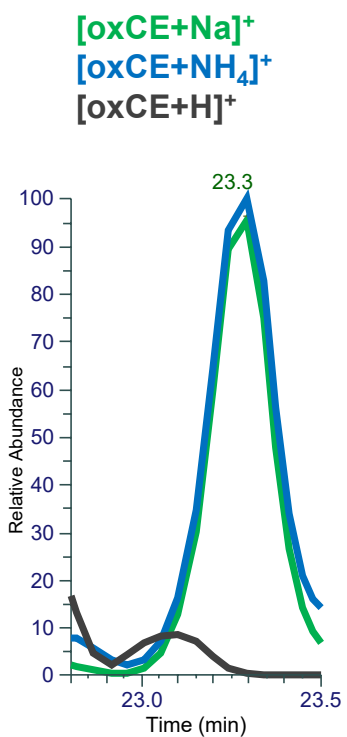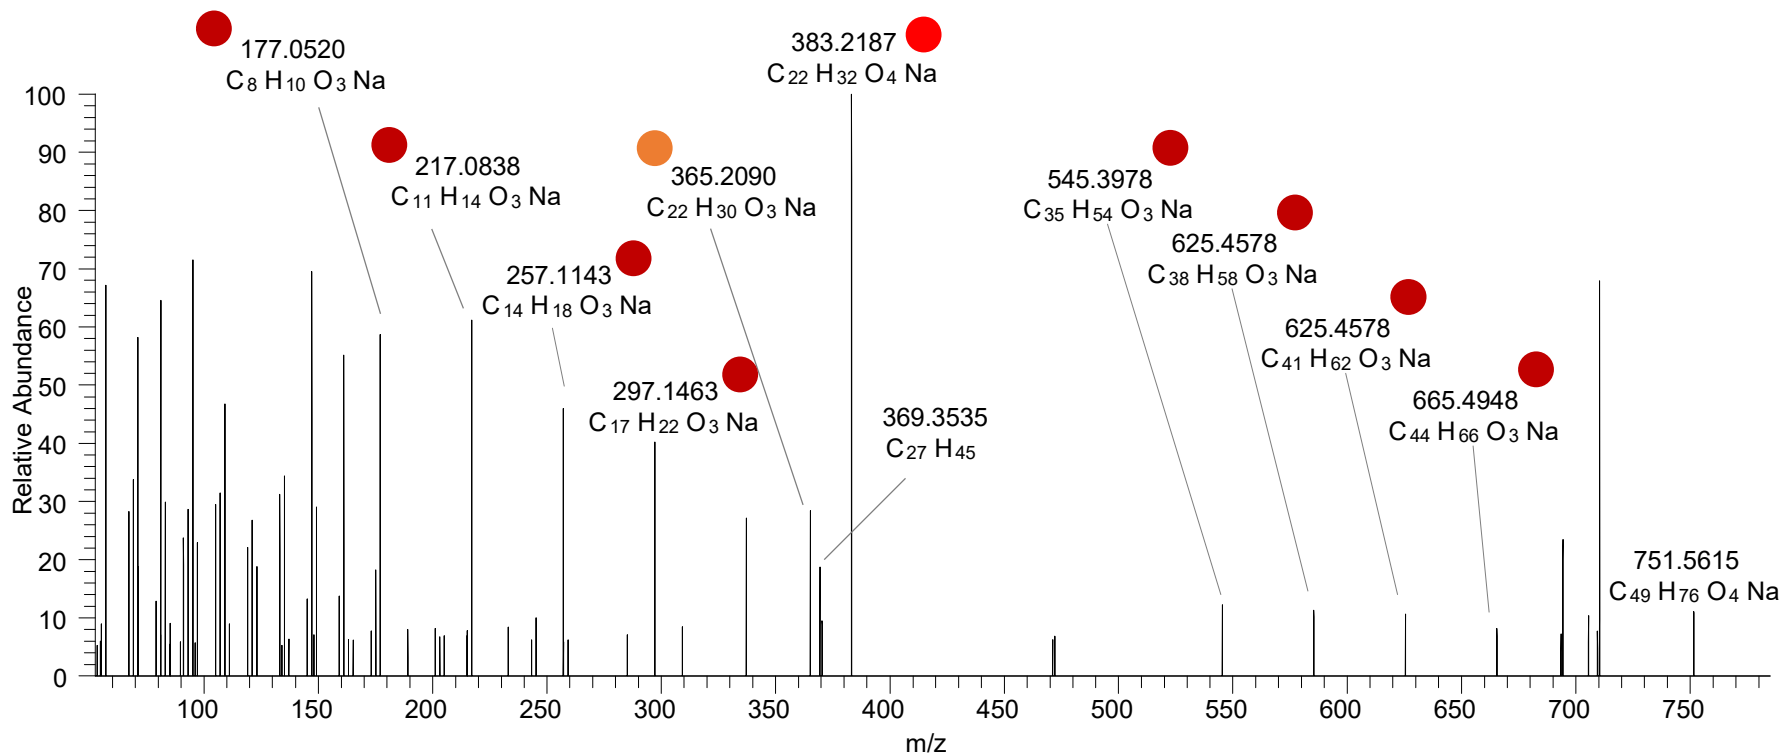

# CE(22:4<OH,ep>) RT 21.4

[oxCE+Na]<sup>+</sup>

XIC 753.5792 NL: 3.91E4

- Fragments containing oxFAs
- Fragments related to water loss
- Fragments not containing oxFAs
- Position-specific fragments
- Fragments related to other oxLPPs

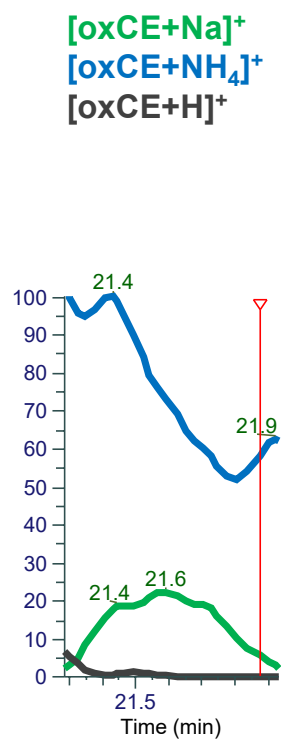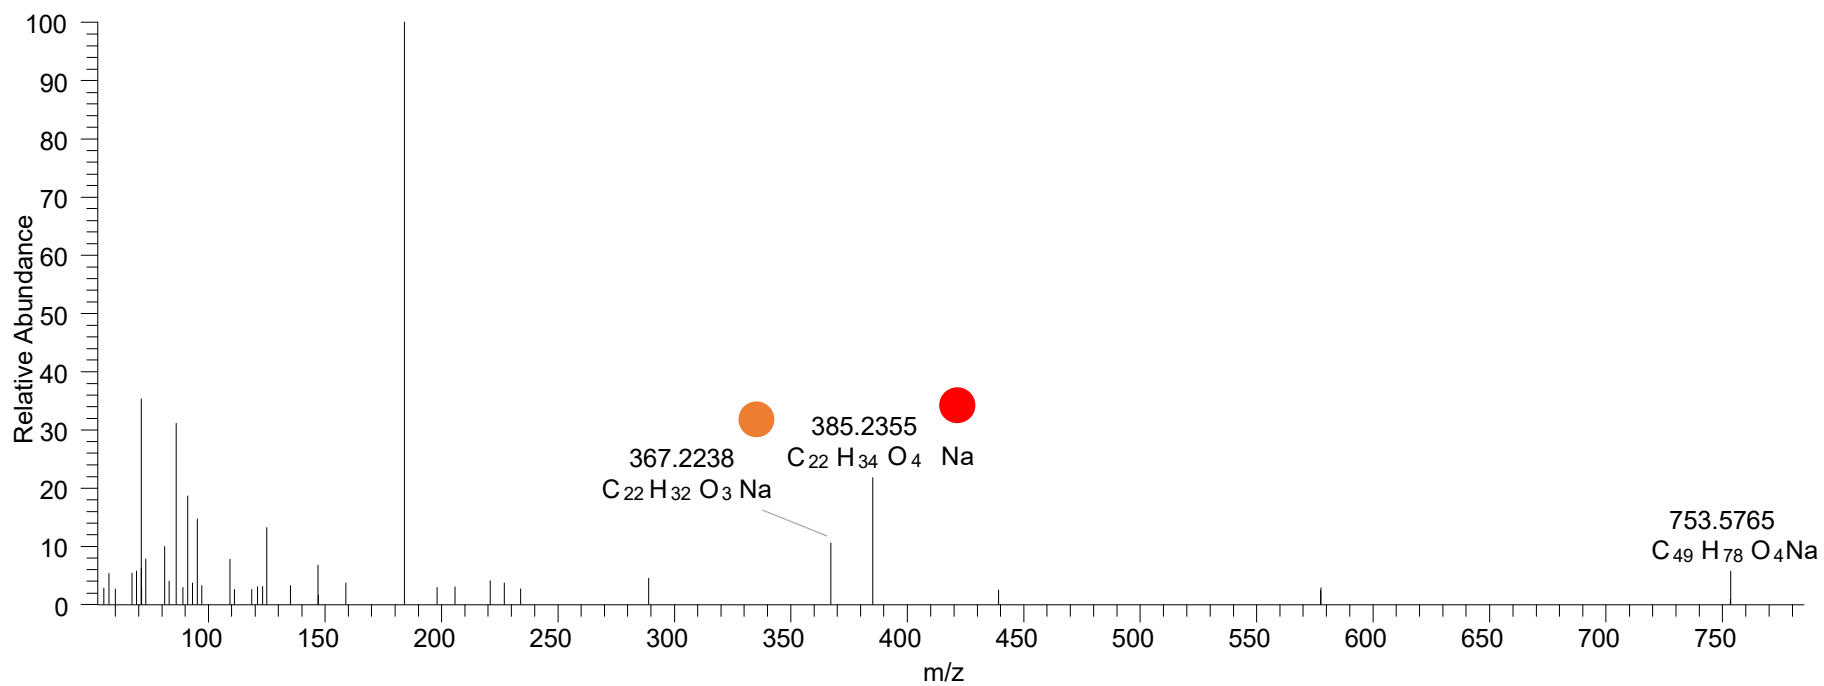

OT2D\_pool

# CE(5:0<oxo{5}>) RT 18.4

[oxCE+Na]<sup>+</sup>

XIC 507.3809 NL: 1.36E5

- Fragments containing oxFAs
- Fragments related to water loss
- Fragments not containing oxFAs
- Position-specific fragments
- Fragments related to other oxLPPs

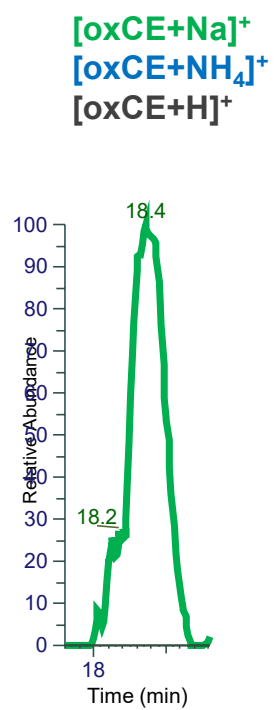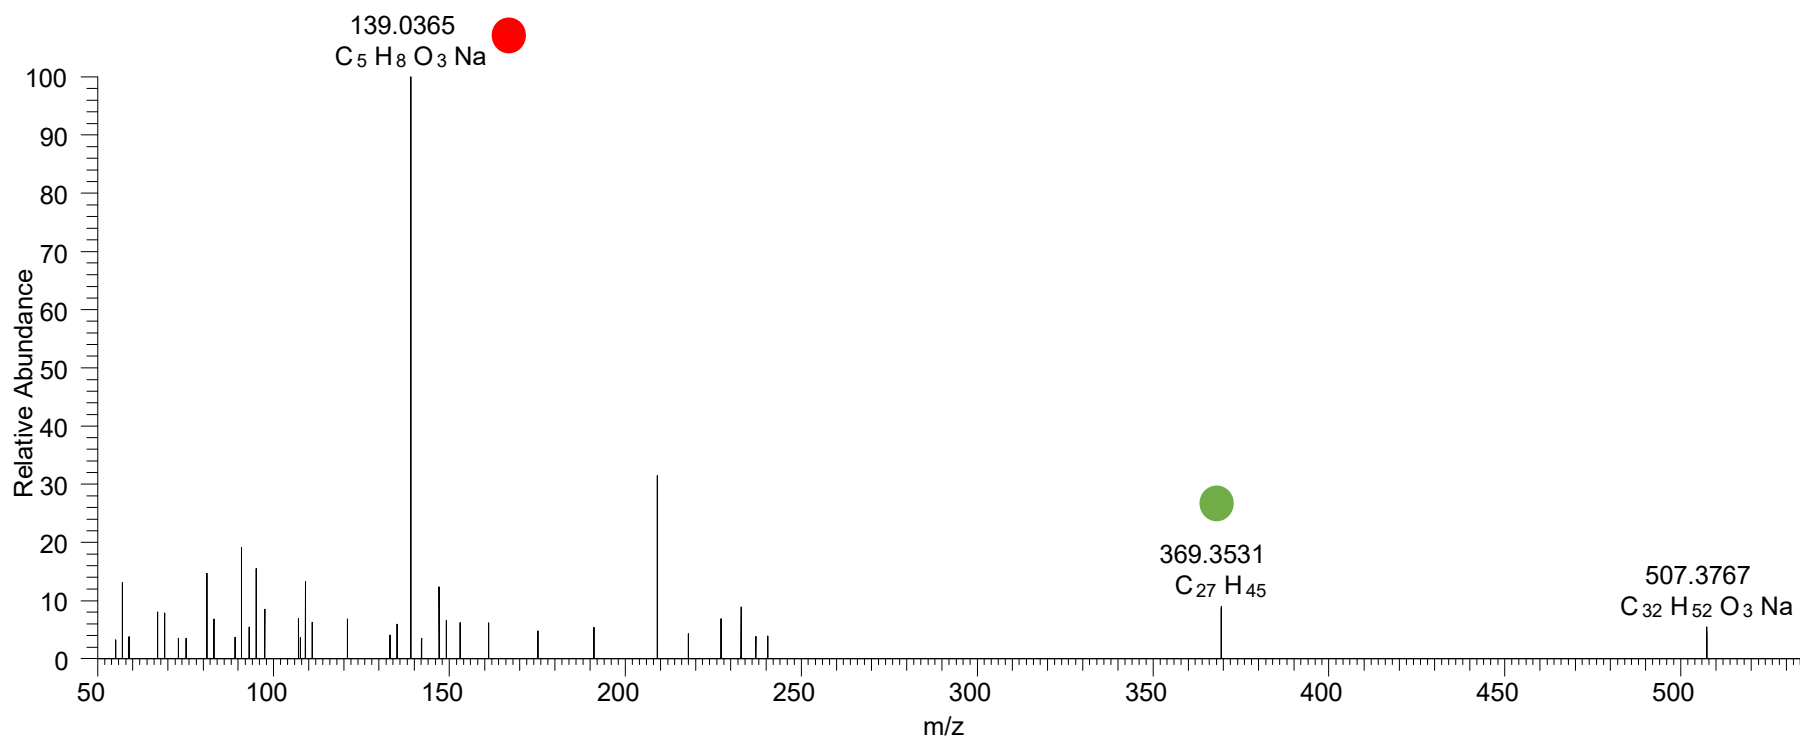

# CE(9:0<oxo{9}>) RT 20.9

[oxCE+Na]<sup>+</sup>

XIC 563.4435 NL: 8.52E5

- Fragments containing oxFAs
- Fragments related to water loss
- Fragments not containing oxFAs
- Position-specific fragments
- Fragments related to other oxLPPs

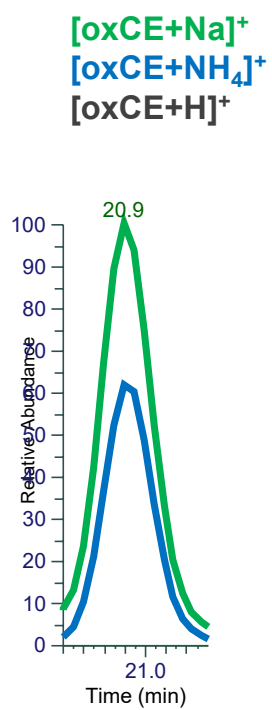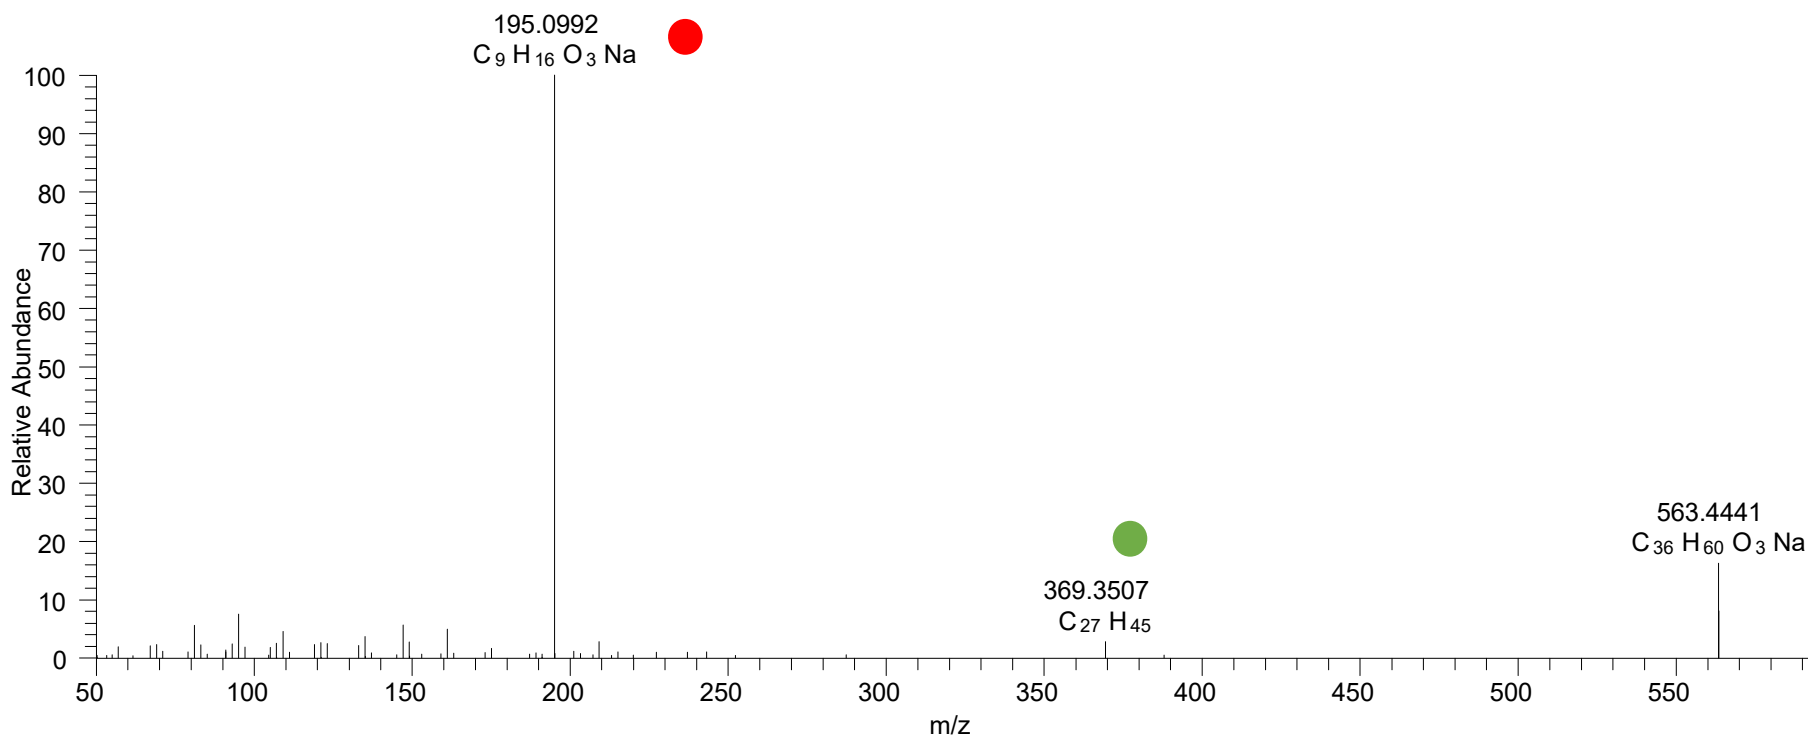

# CE(8:0<COOH{8}>)

## RT 22.1

[oxCE+Na]<sup>+</sup>

XIC 565.4227 NL: 2.69E4

- Fragments containing oxFAs
- Fragments related to water loss
- Fragments not containing oxFAs
- Position-specific fragments
- Fragments related to other oxLPPs

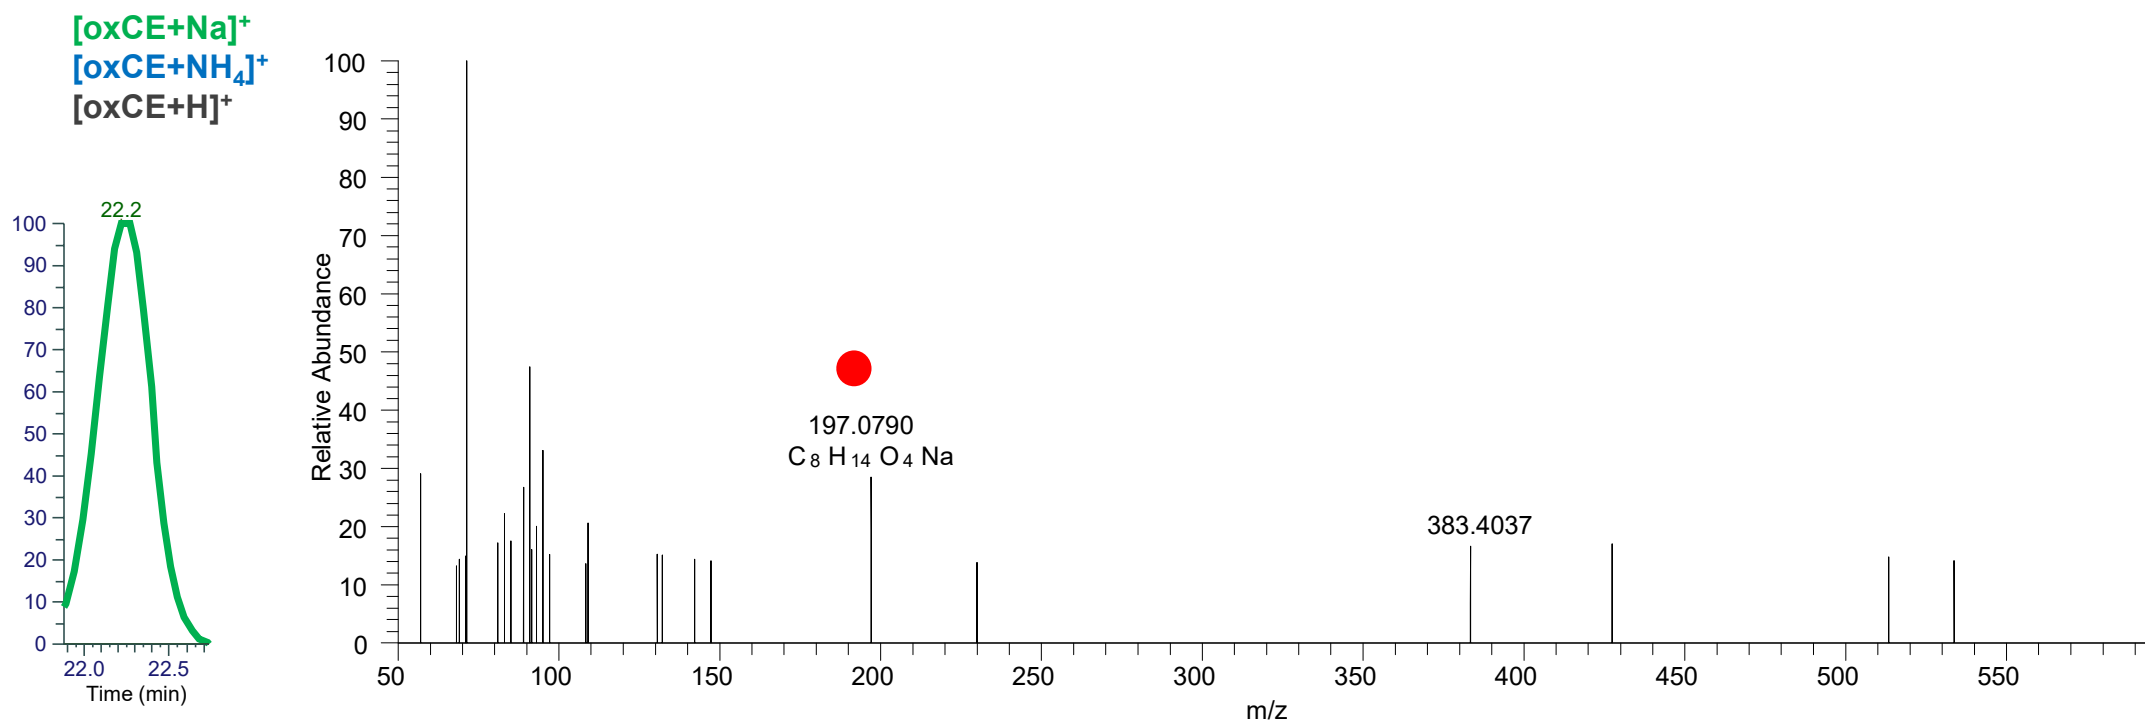

# CE(10:2<oxo{10}>) RT 20.8

[oxCE+Na]<sup>+</sup>

XIC 573.4278 NL: 2.19E5

- Fragments containing oxFAs
- Fragments related to water loss
- Fragments not containing oxFAs
- Position-specific fragments
- Fragments related to other oxLPPs

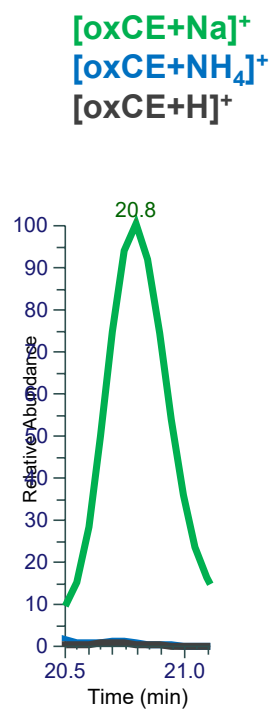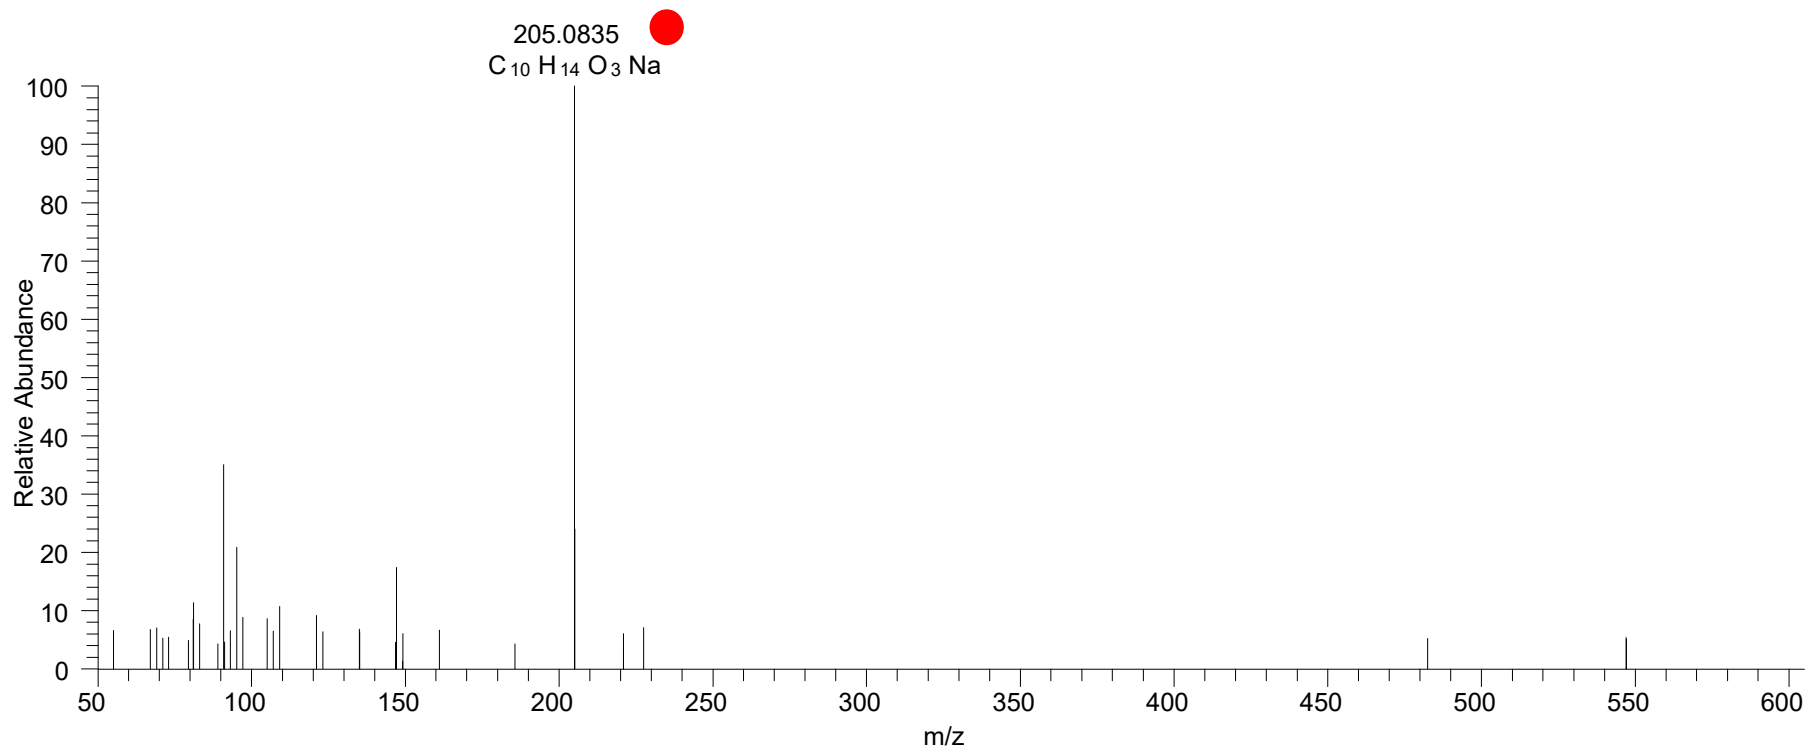

# CE(11:2<oxo{11}>) RT 20.3

[oxCE+Na]<sup>+</sup>

XIC 587.4435 NL: 2.90E4

- Fragments containing oxFAs
- Fragments related to water loss
- Fragments not containing oxFAs
- Position-specific fragments
- Fragments related to other oxLPPs

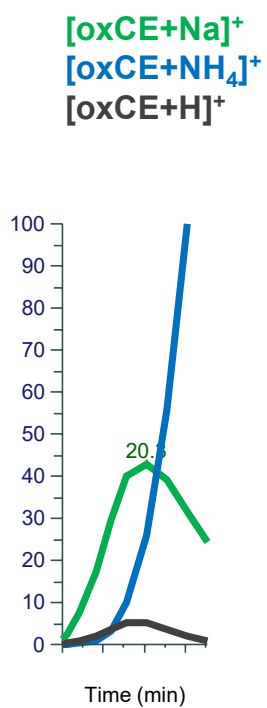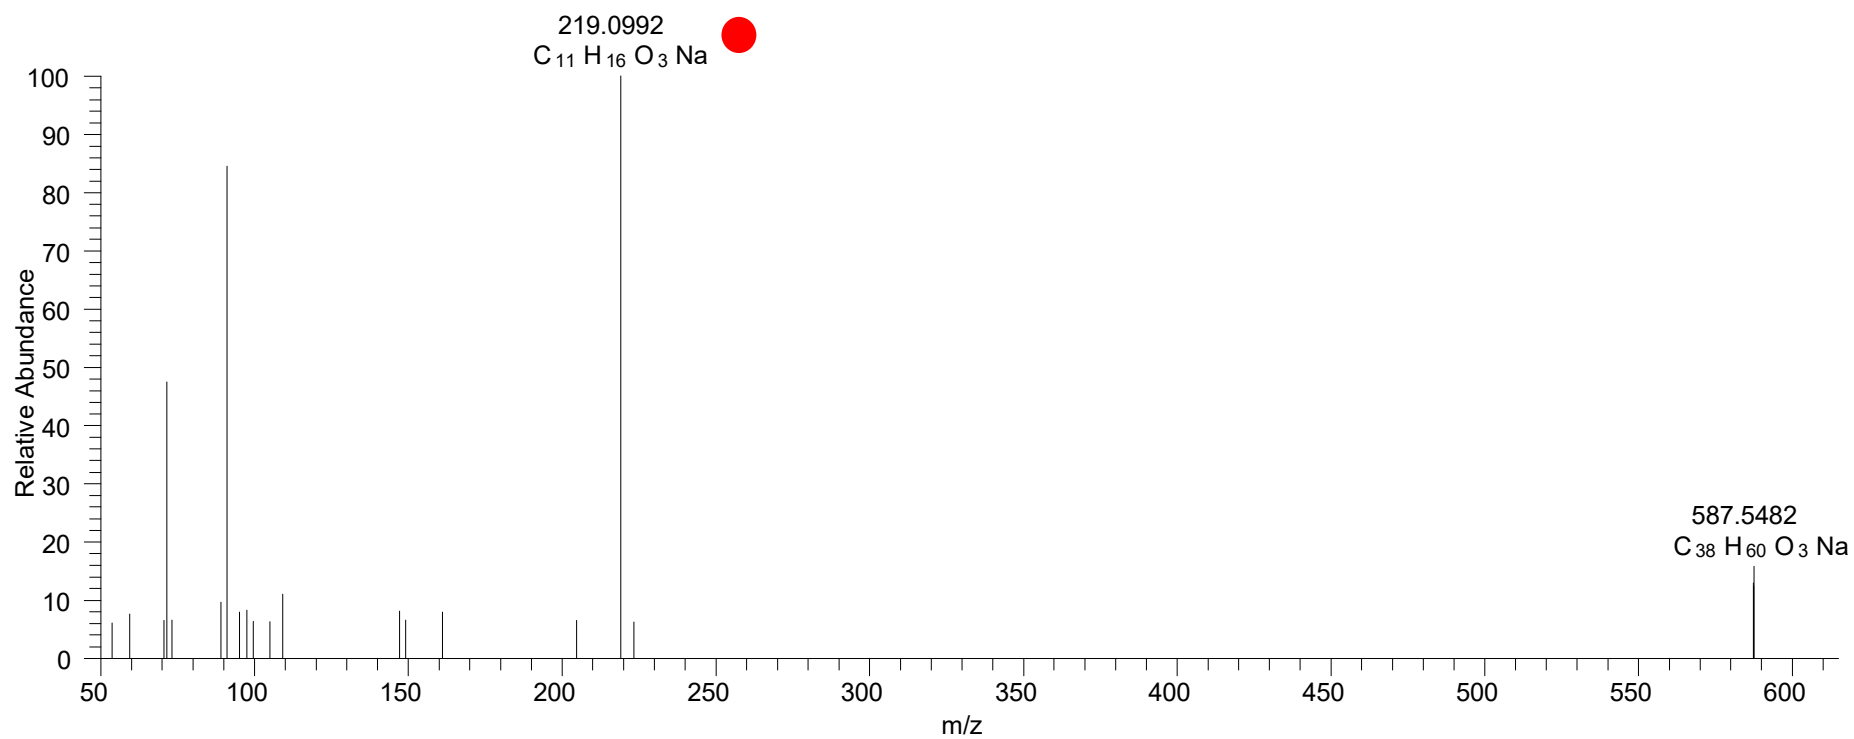



# CE(11:3<COOH{11}>) RT 21.1

[oxCE+Na]<sup>+</sup>

XIC 601.4227 NL: 2.04E4

- Fragments containing oxFAs
- Fragments related to water loss
- Fragments not containing oxFAs
- Position-specific fragments
- Fragments related to other oxLPPs

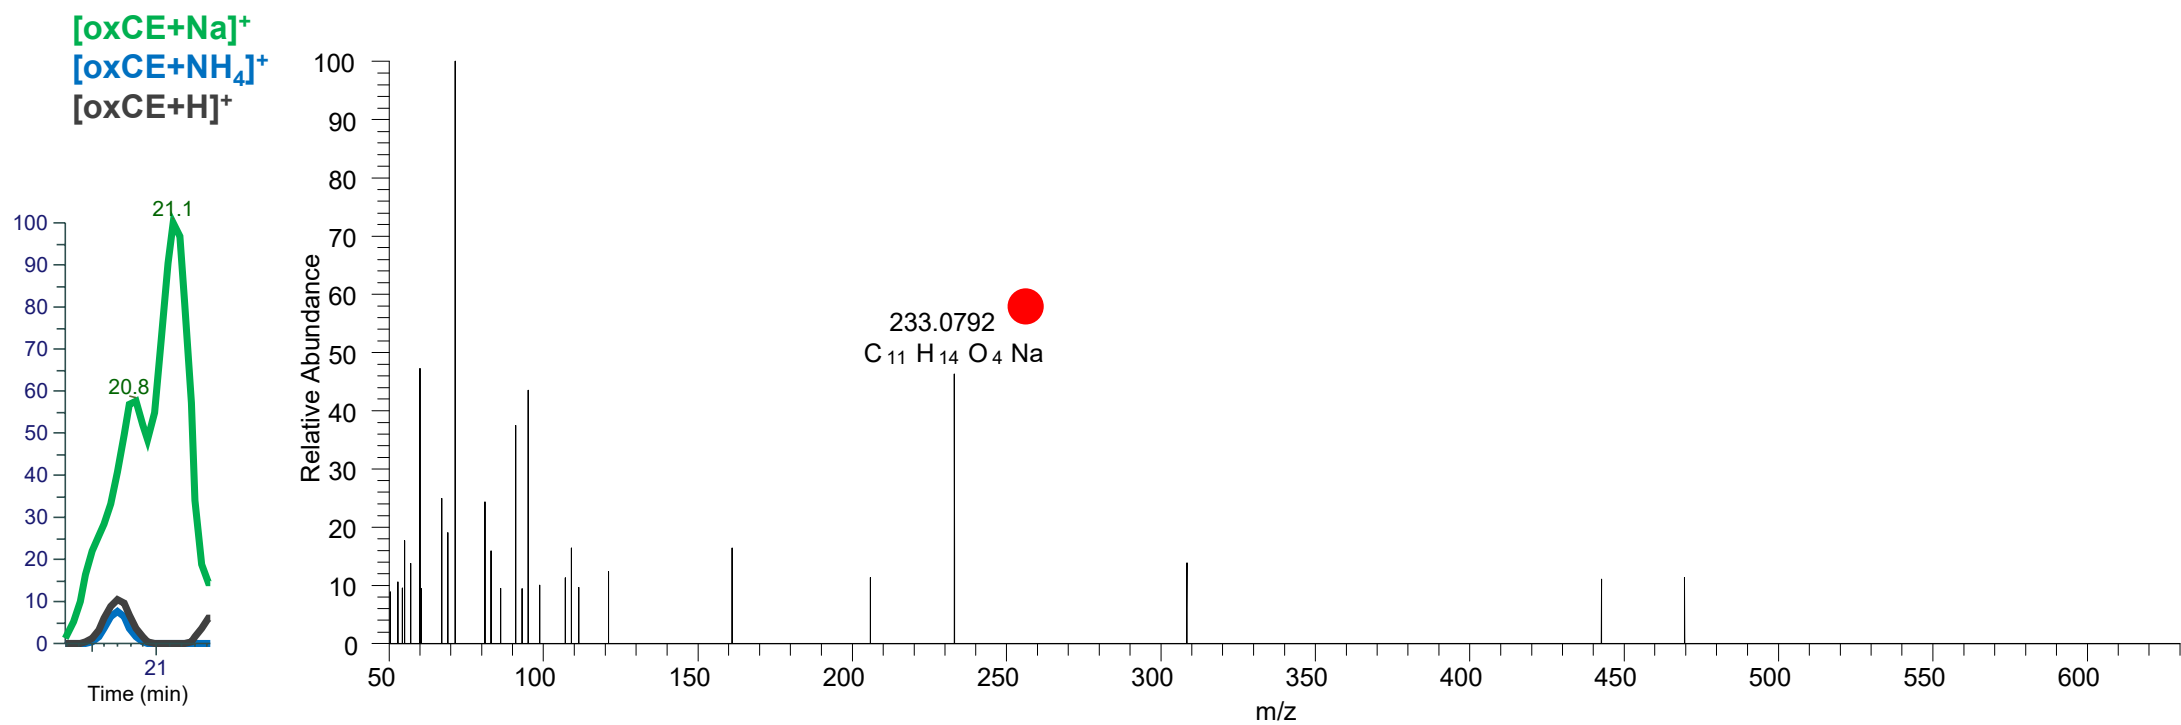

# CE(12:1<oxo{12}>)

## RT 22.1

[oxCE+Na]<sup>+</sup>

XIC 603.4753 NL: 1.98E4

- Fragments containing oxFAs
- Fragments related to water loss
- Fragments not containing oxFAs
- Position-specific fragments
- Fragments related to other oxLPPs

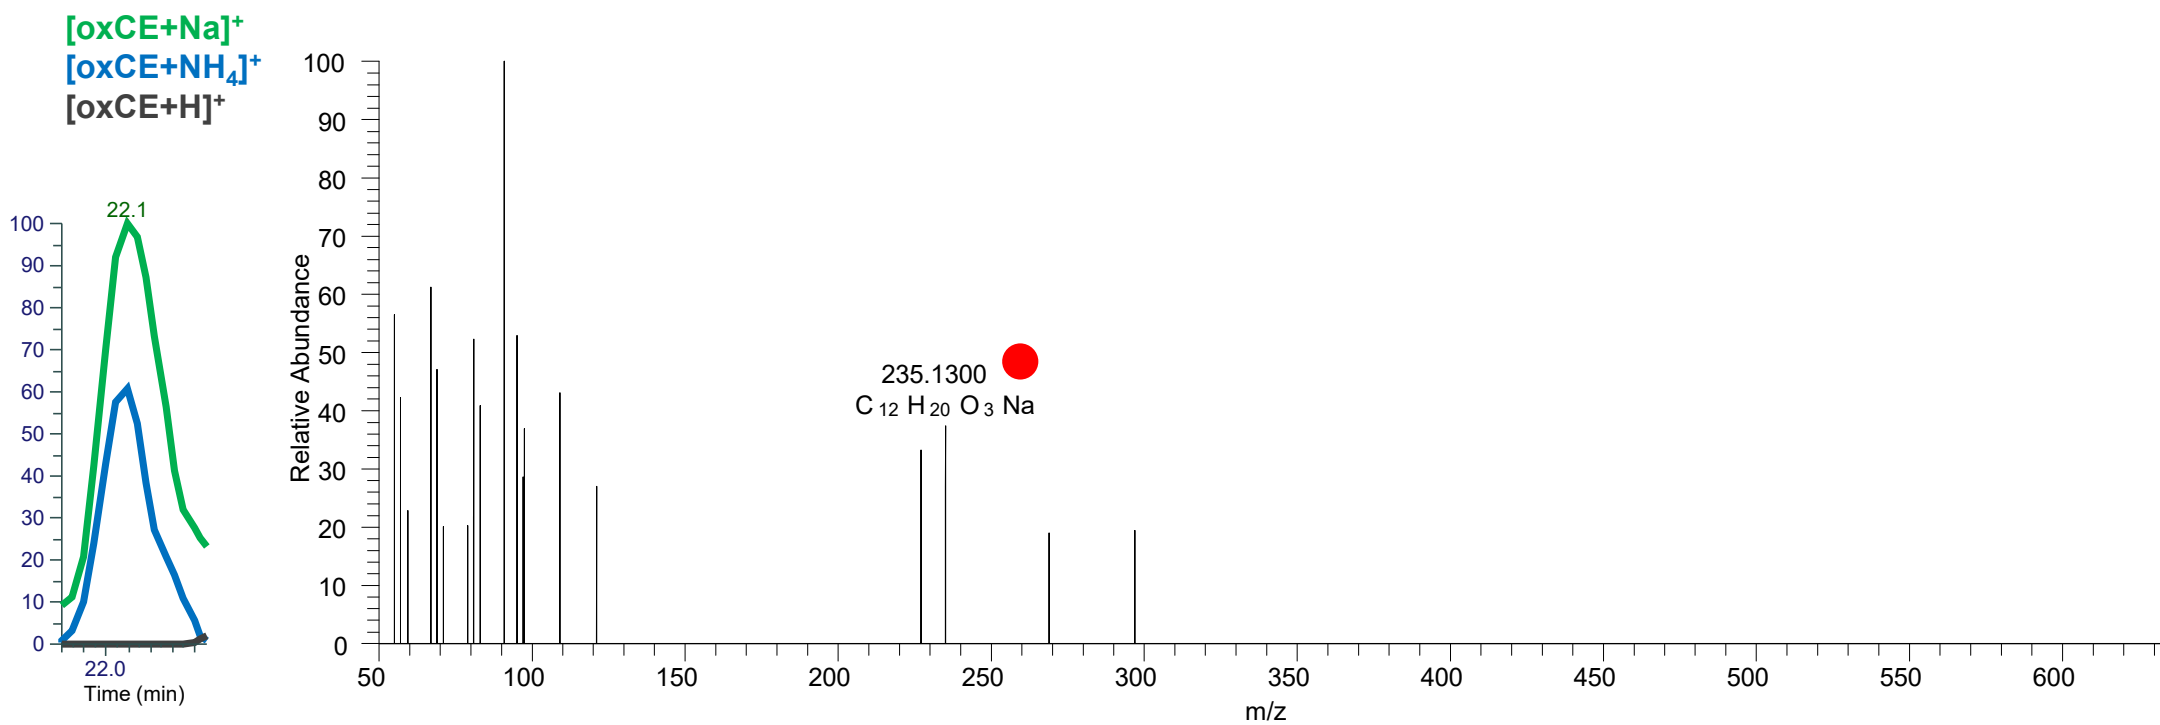

# CE(12:2<COOH{12}>) RT 20.5

[oxCE+Na]<sup>+</sup>

XIC 617.4541 NL: 1.26E4

- Fragments containing oxFAs
- Fragments related to water loss
- Fragments not containing oxFAs
- Position-specific fragments
- Fragments related to other oxLPPs

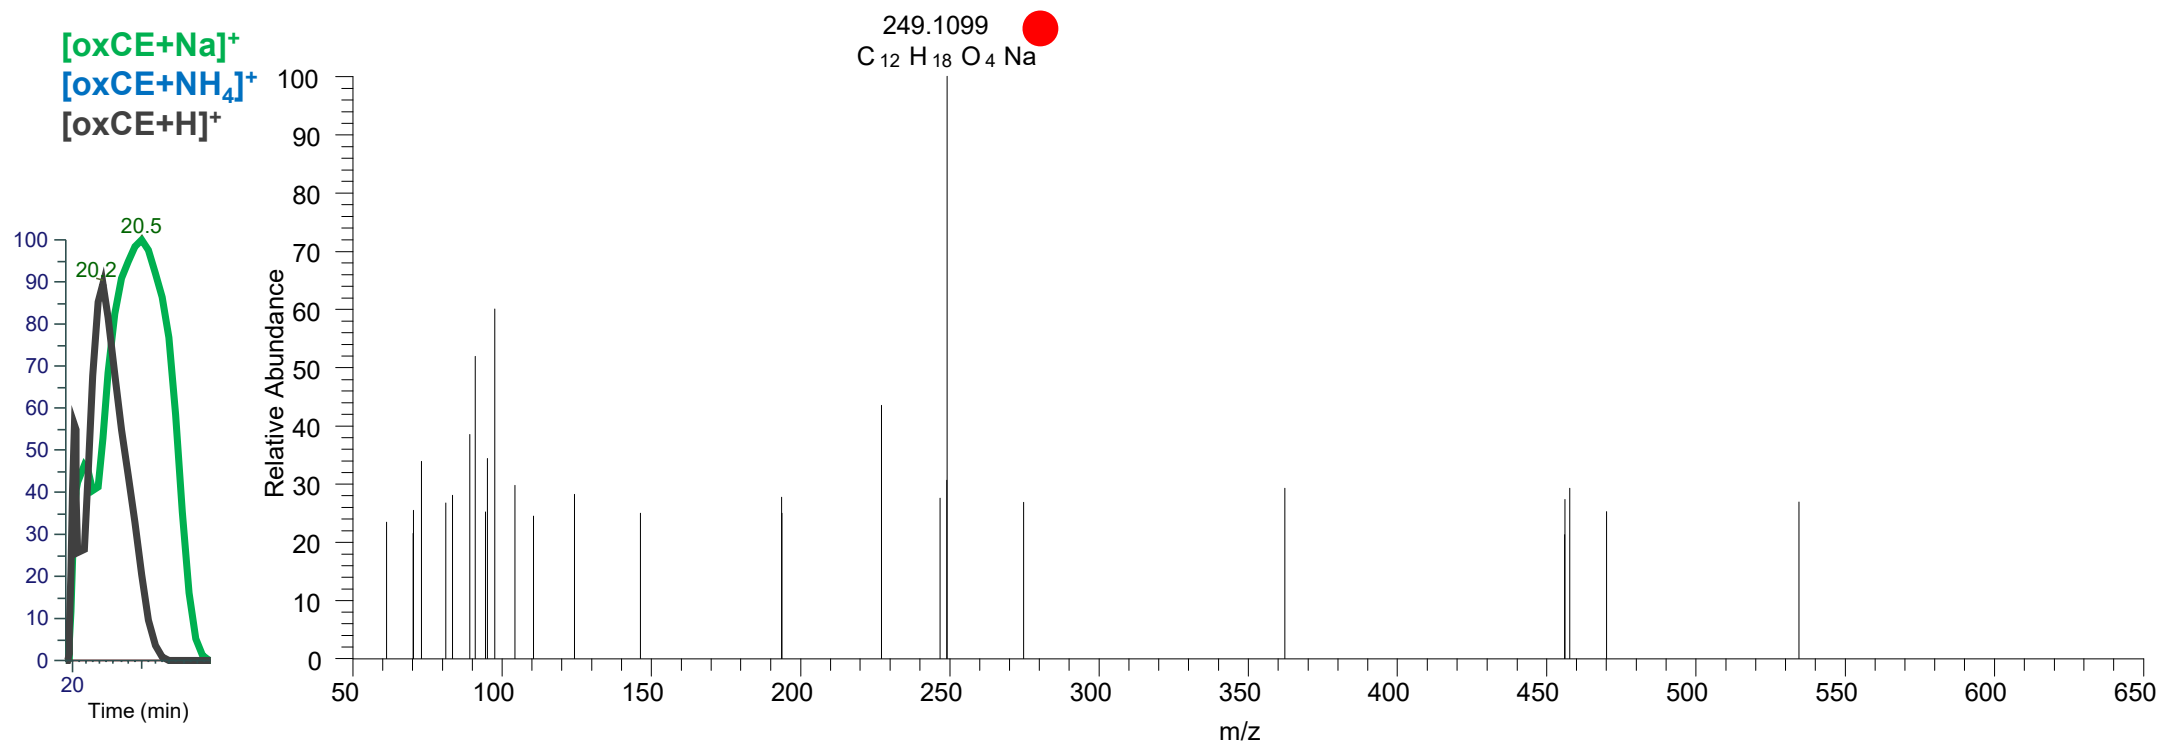

# CE(12:1<COOH{12}>) RT 20.3

[oxCE+Na]<sup>+</sup>

XIC 619.4697 NL: 3.73E4

- Fragments containing oxFAs
- Fragments related to water loss
- Fragments not containing oxFAs
- Position-specific fragments
- Fragments related to other oxLPPs

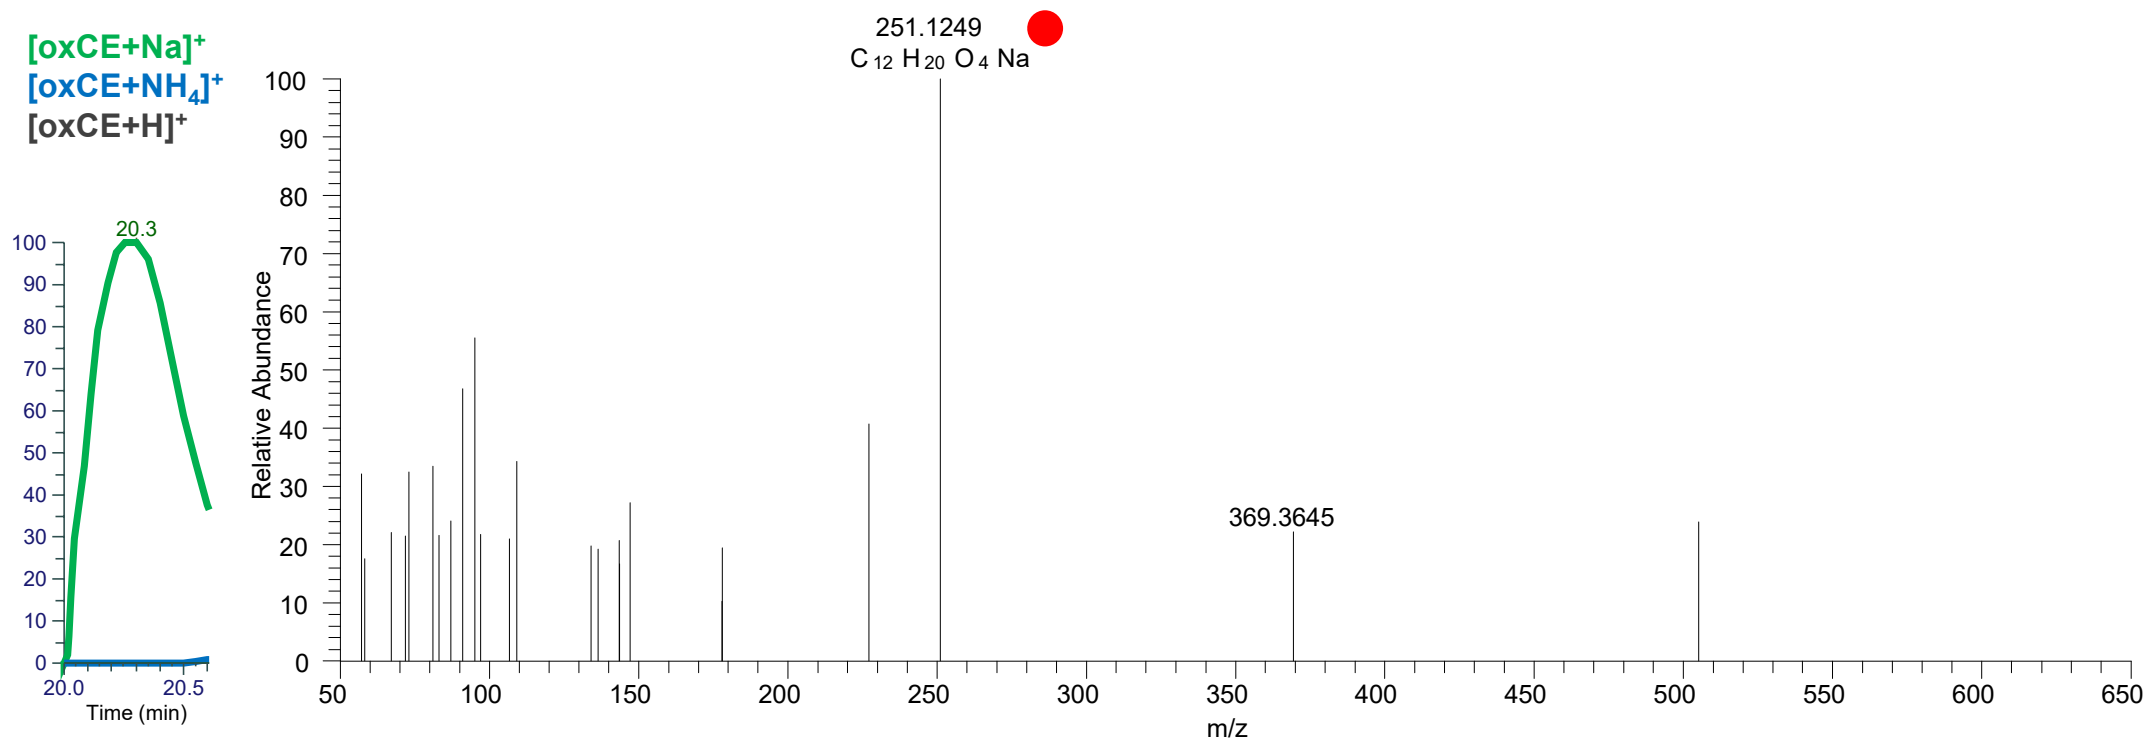

# CE(18:3<OH>) RT 23.3

[oxCE+Na]<sup>+</sup>

XIC 685.5531 NL: 1.51E6

- Fragments containing oxFAs
- Fragments related to water loss
- Fragments not containing oxFAs
- Position-specific fragments
- Fragments related to other oxLPPs

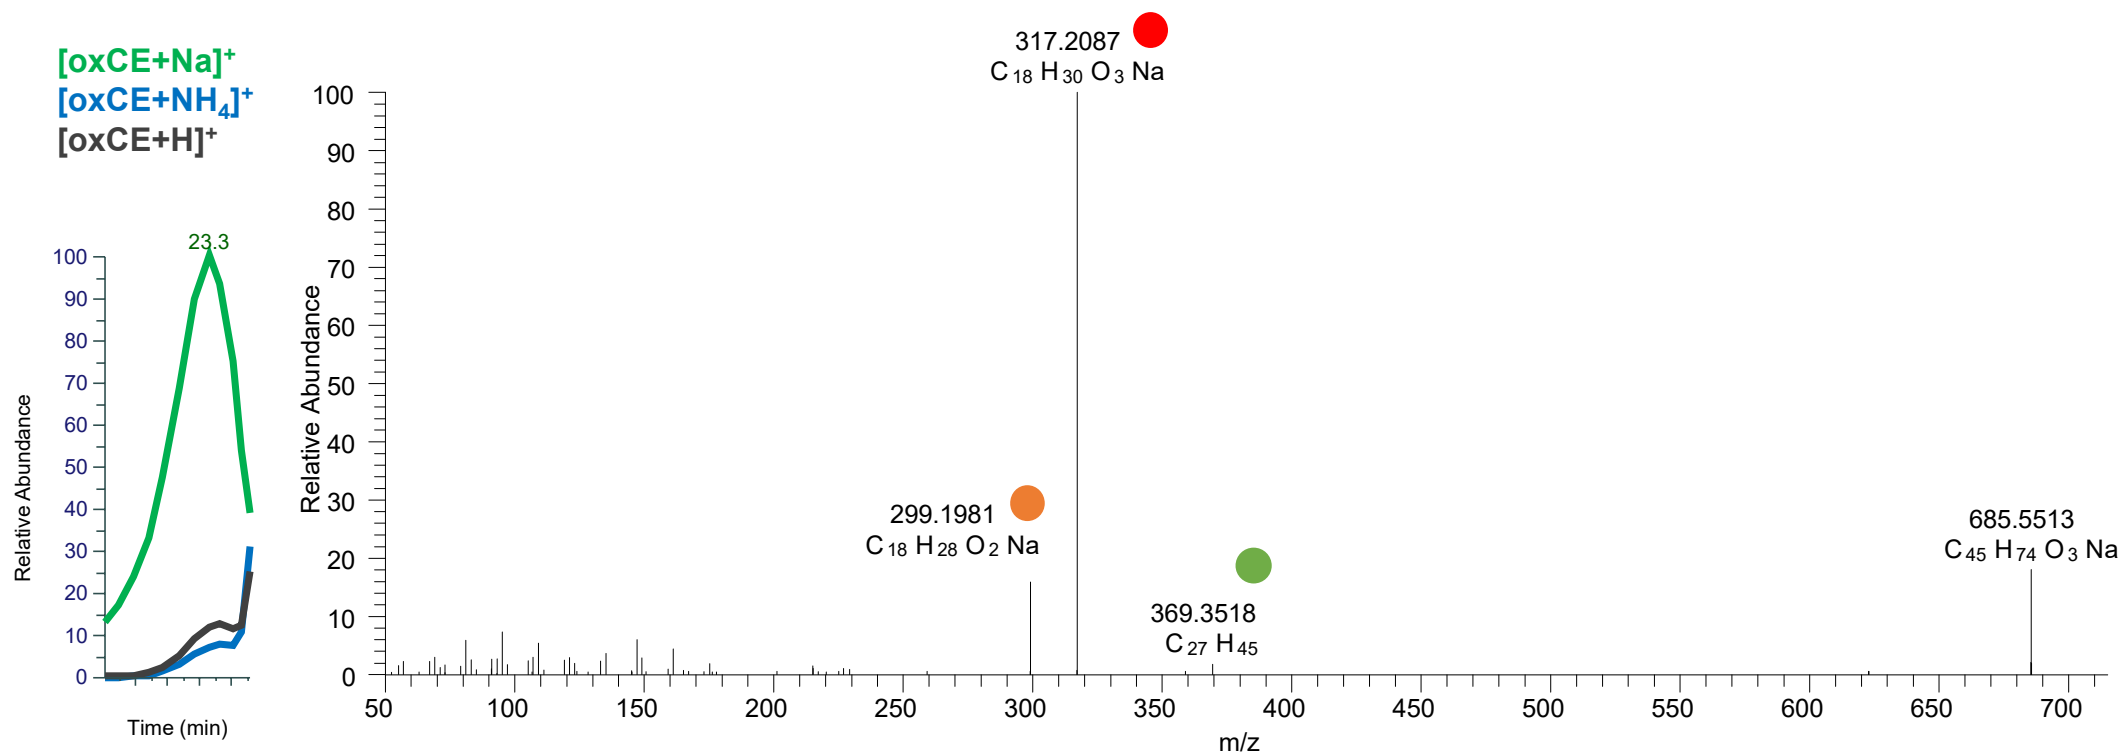

# CE(18:2<ep>) RT 23.9

[oxCE+Na]<sup>+</sup>

XIC 685.5531 NL: 8.84E5

- Fragments containing oxFAs
- Fragments related to water loss
- Fragments not containing oxFAs
- Position-specific fragments
- Fragments related to other oxLPPs

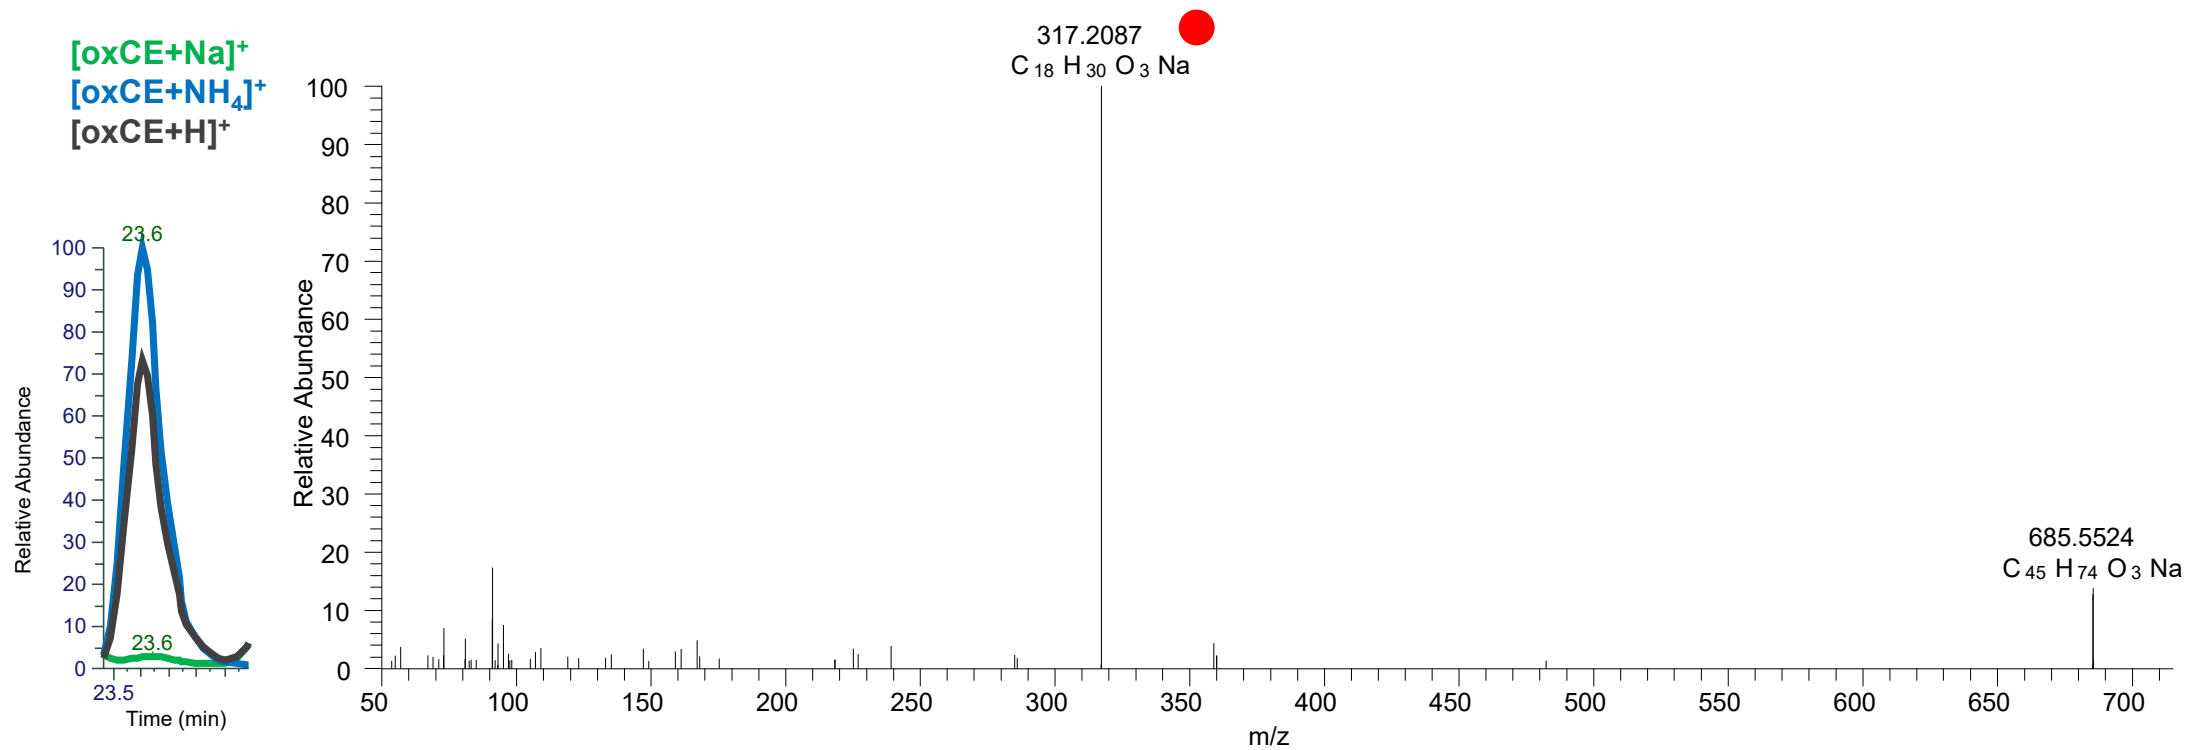

# CE(18:2<oxo>) RT 24.2

[oxCE+Na]<sup>+</sup>

XIC 685.5531 NL: 5.99E6

- Fragments containing oxFAs
- Fragments related to water loss
- Fragments not containing oxFAs
- Position-specific fragments
- Fragments related to other oxLPPs

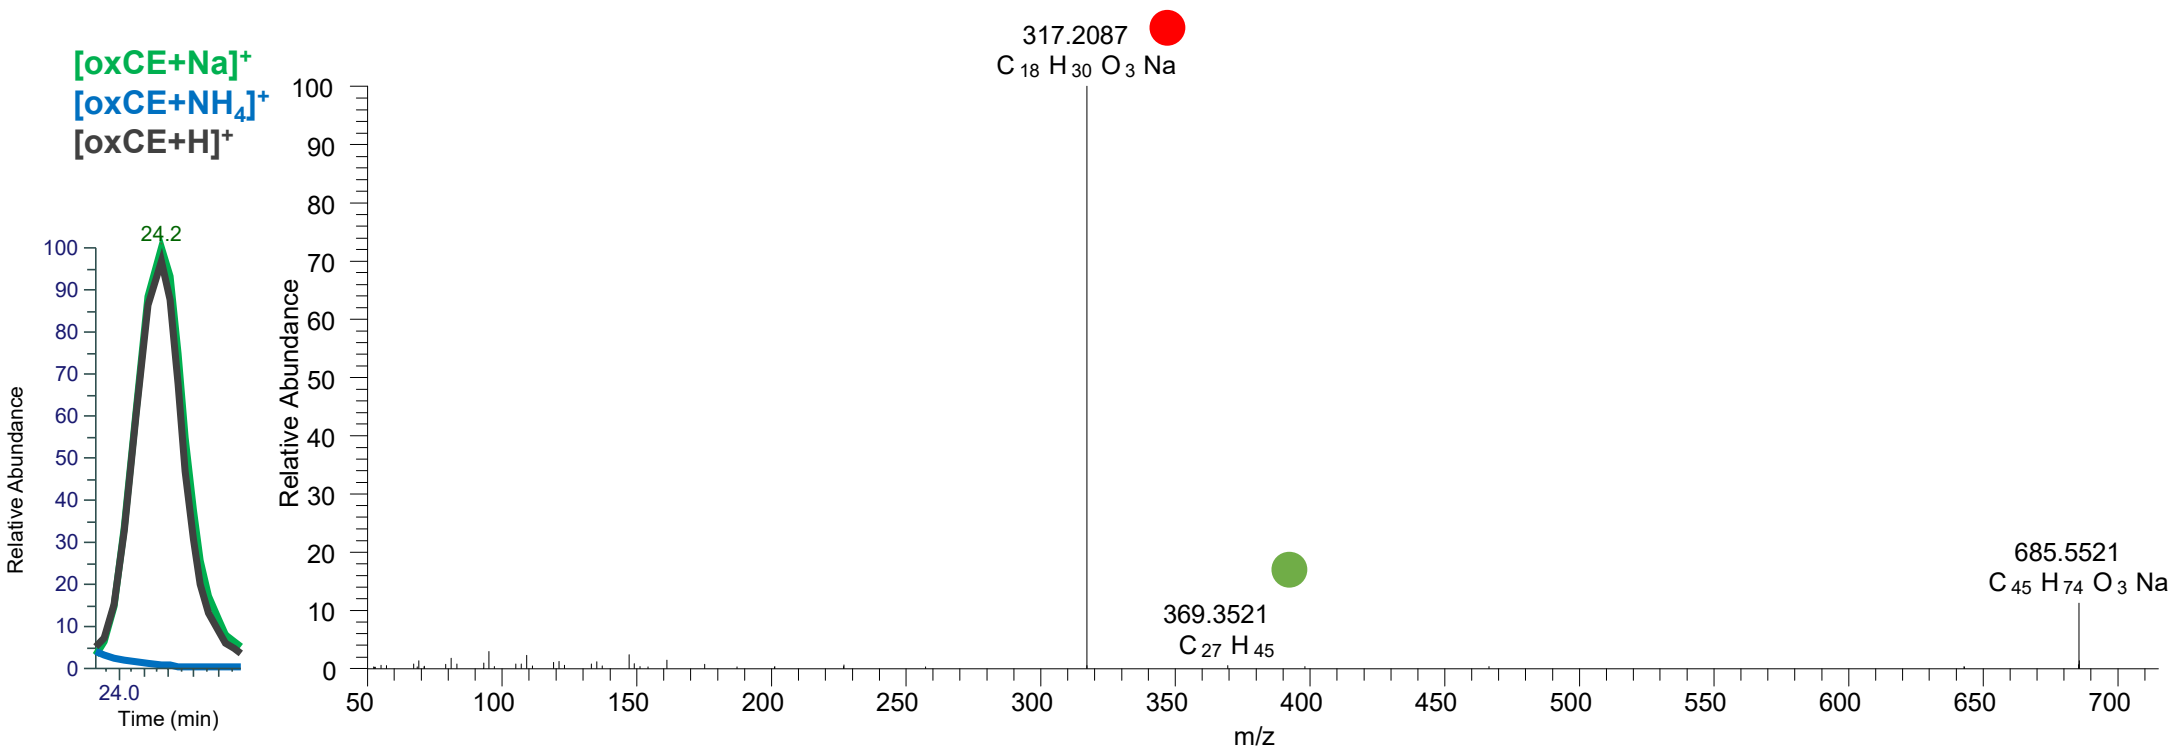

# CE(18:2<OH>) RT 23.5

[oxCE+Na]<sup>+</sup>

XIC 687.5687 NL: 4.00E6

- Fragments containing oxFAs
- Fragments related to water loss
- Fragments not containing oxFAs
- Position-specific fragments
- Fragments related to other oxLPPs

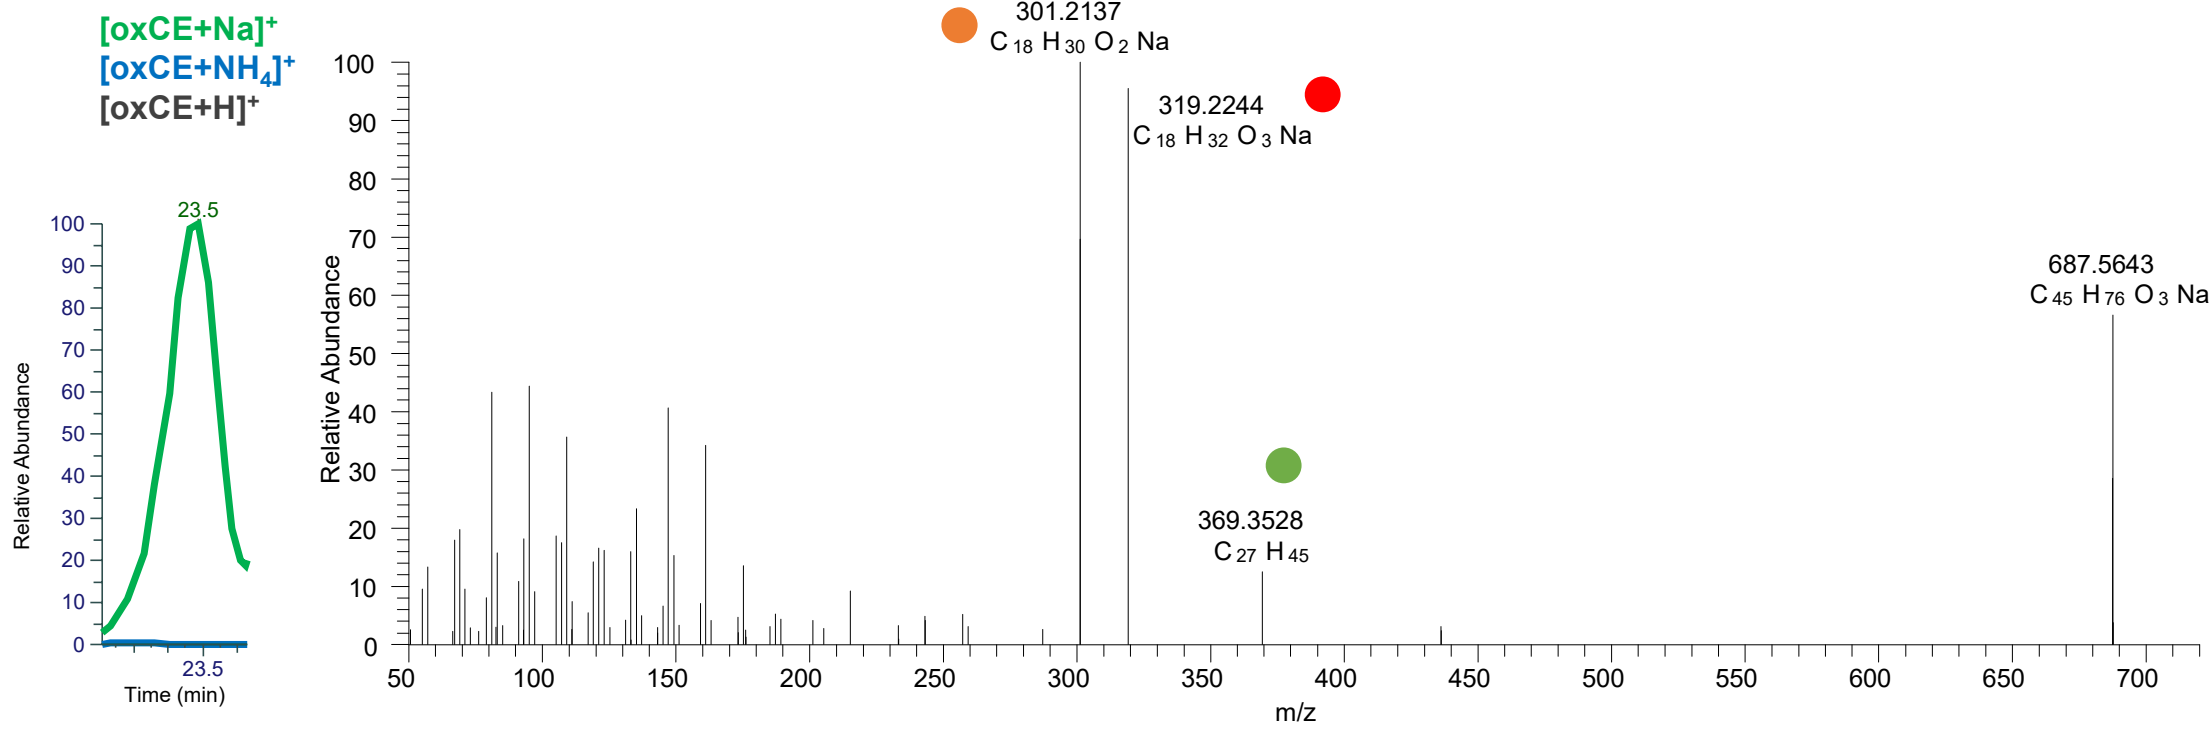



# CE(18:2<OH>) RT 23.8

[oxCE+Na]<sup>+</sup>

XIC 687.5687 NL: 1.62E7

- Fragments containing oxFAs
- Fragments related to water loss
- Fragments not containing oxFAs
- Position-specific fragments
- Fragments related to other oxLPPs

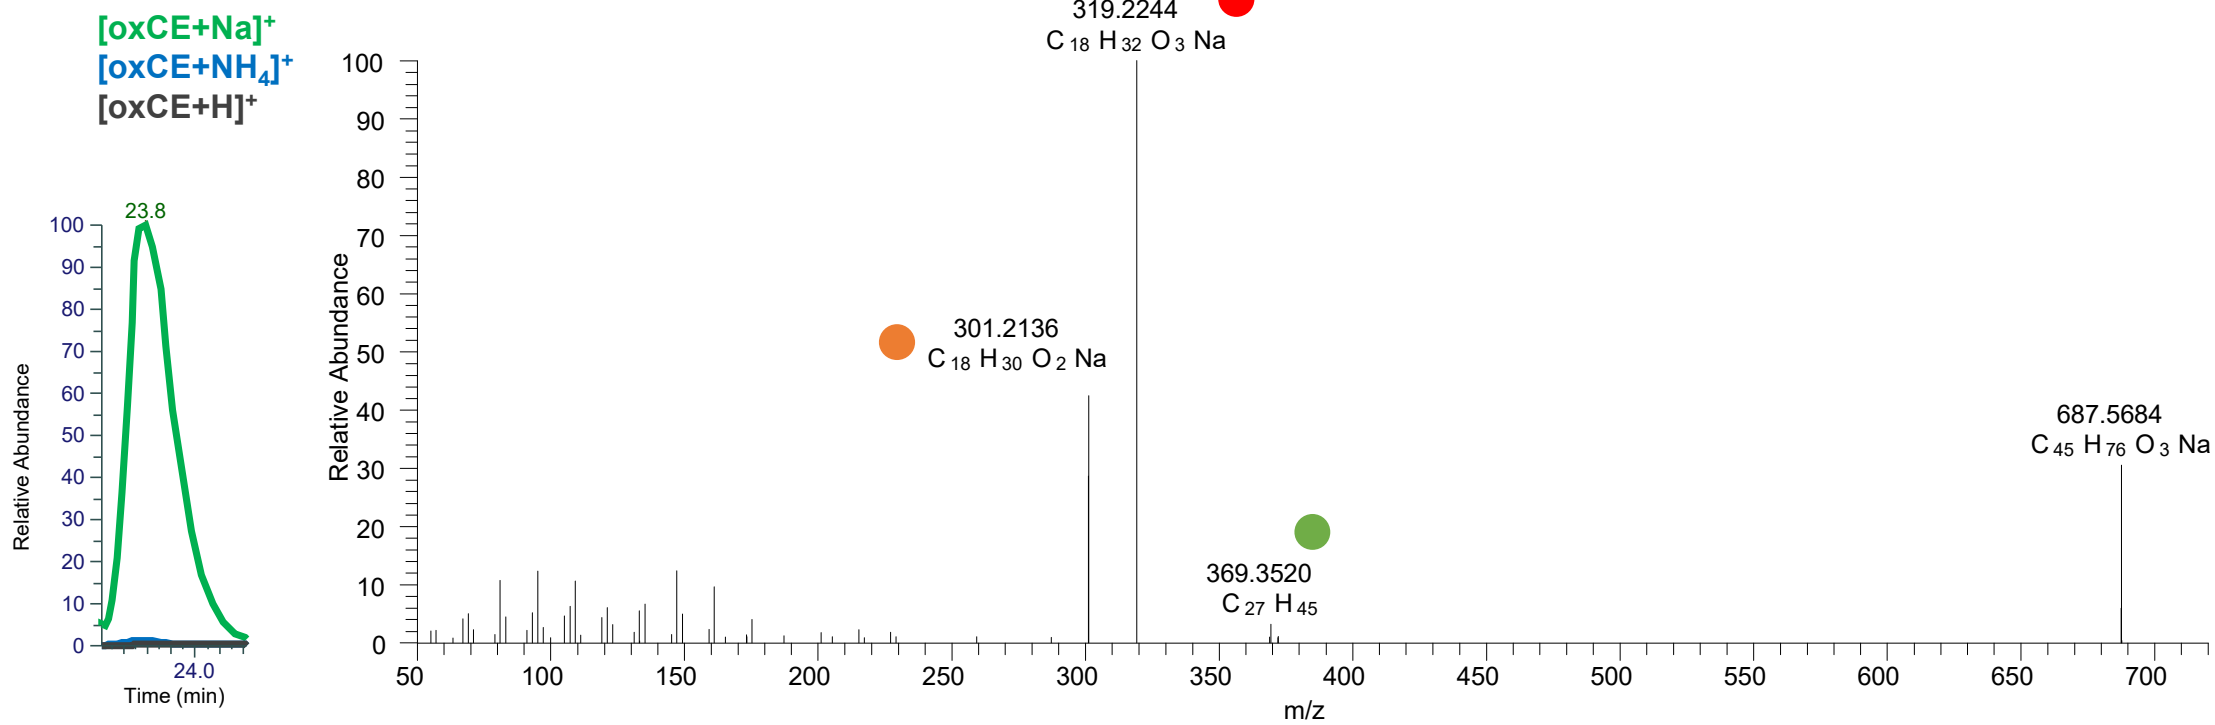

# CE(18:1<ep>) RT 25.2

[oxCE+Na]<sup>+</sup>

XIC 687.5687 NL: 3.37E5

- Fragments containing oxFAs
- Fragments related to water loss
- Fragments not containing oxFAs
- Position-specific fragments
- Fragments related to other oxLPPs

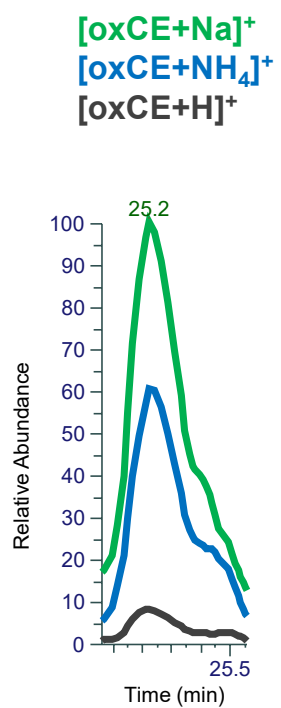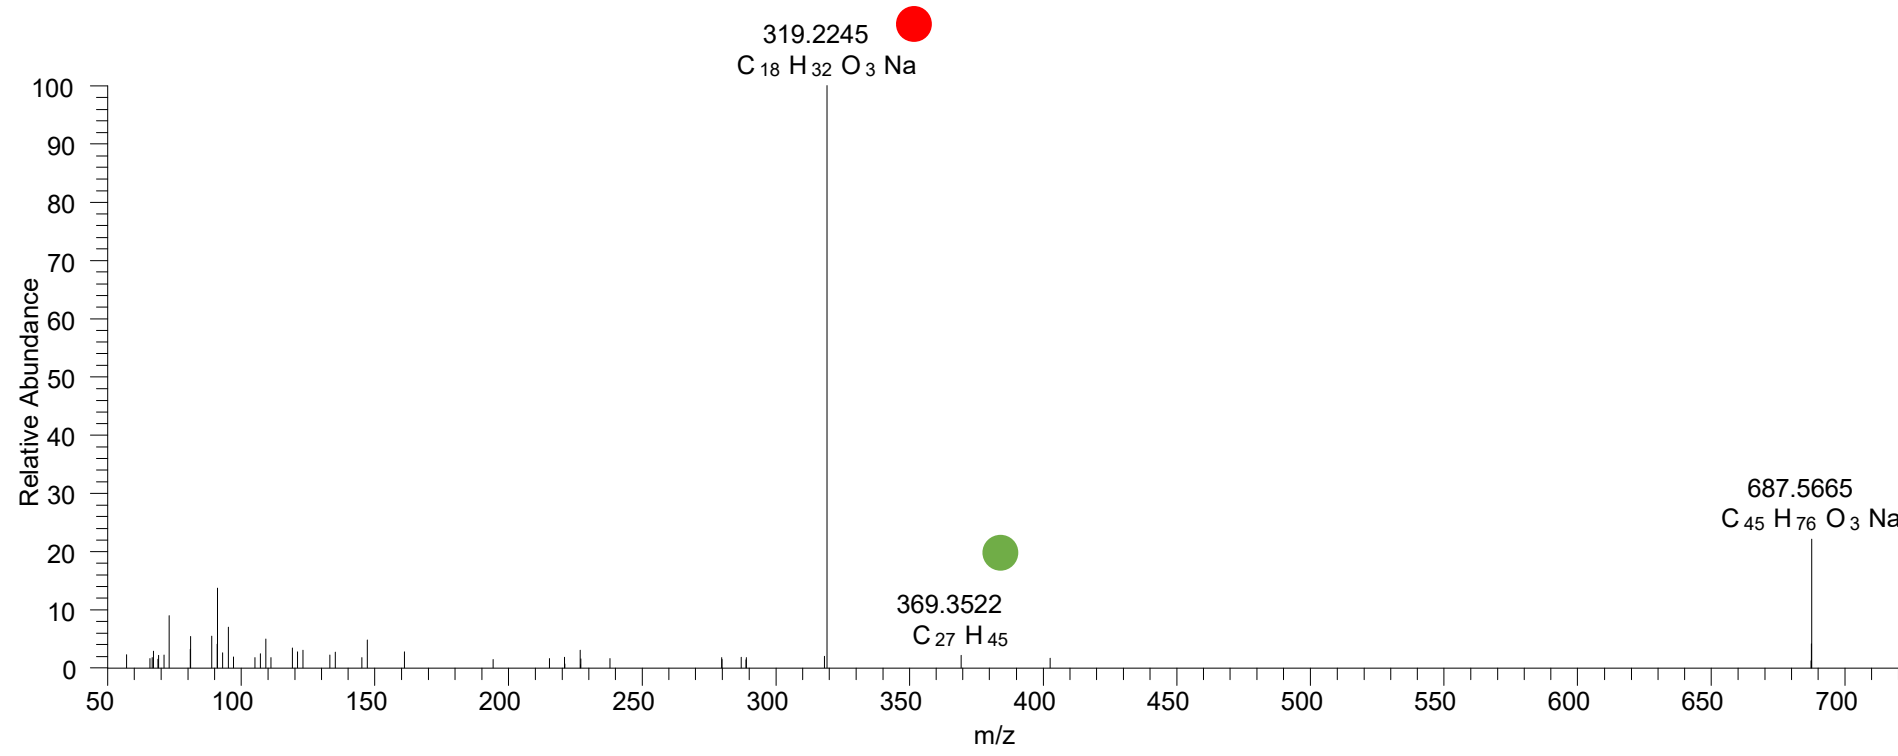

# CE(18:1<OH>) RT 24.2

[oxCE+Na]<sup>+</sup>

XIC 689.5843 NL: 4.81E5

- Fragments containing oxFAs
- Fragments related to water loss
- Fragments not containing oxFAs
- Position-specific fragments
- Fragments related to other oxLPPs

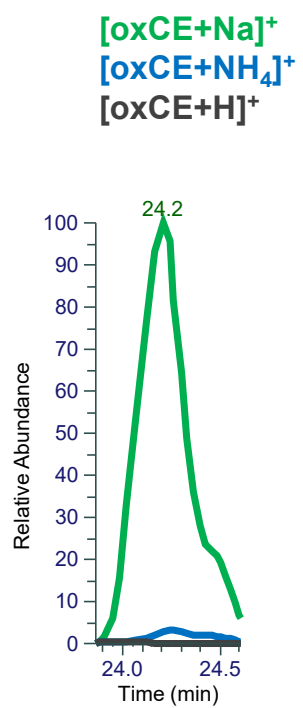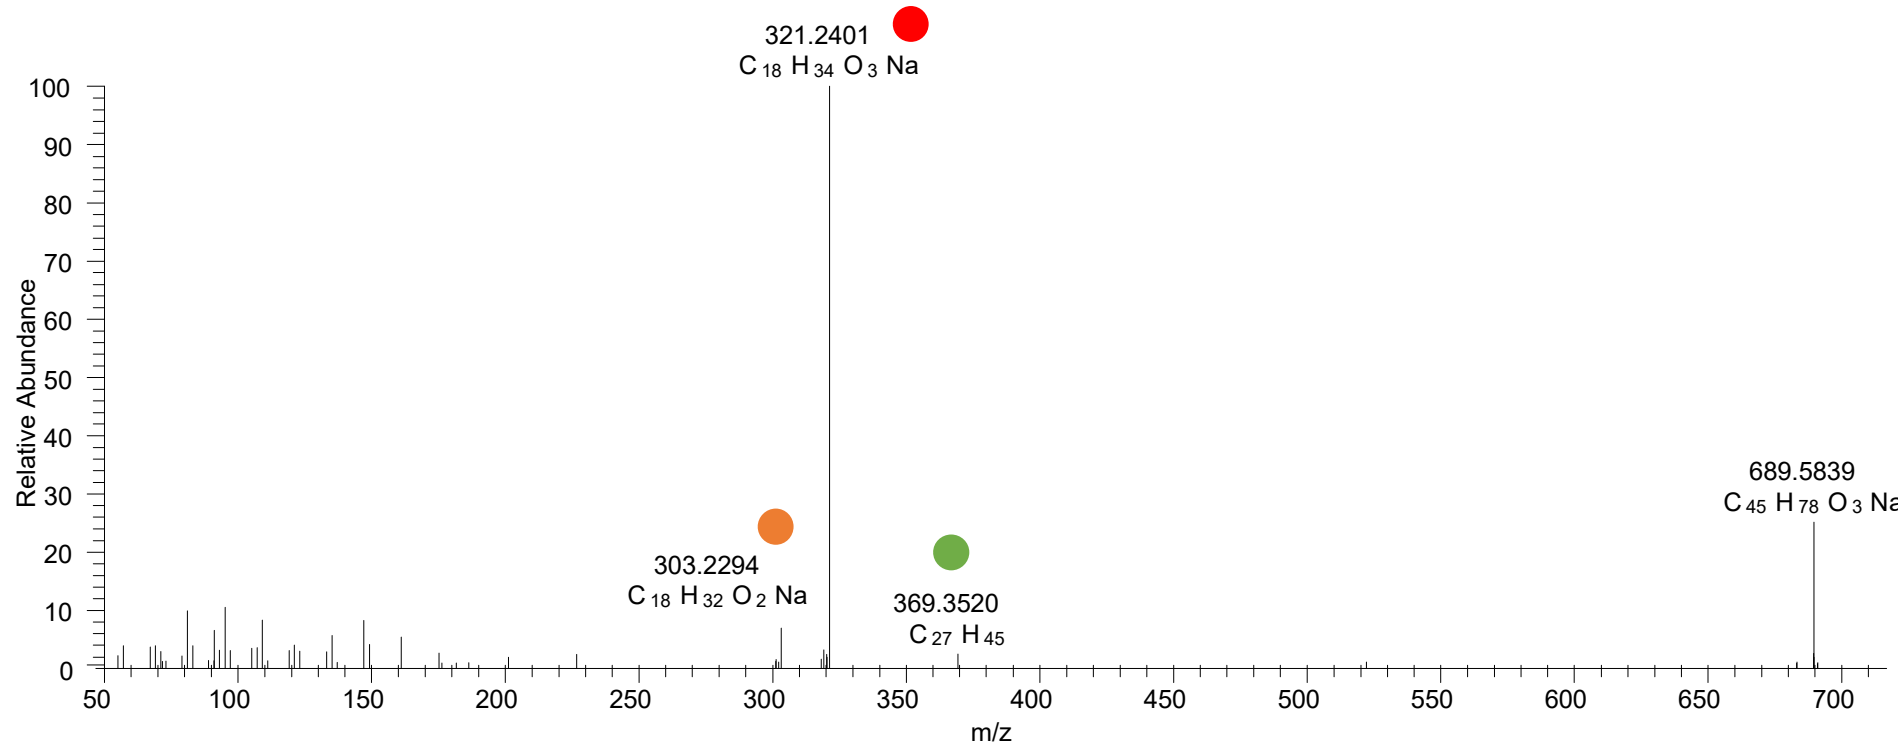

# CE(18:3<2OH>) RT 20.6

[oxCE+Na]<sup>+</sup>

XIC 701.5480 NL: 2.15E5

- Fragments containing oxFAs
- Fragments related to water loss
- Fragments not containing oxFAs
- Position-specific fragments
- Fragments related to other oxLPPs

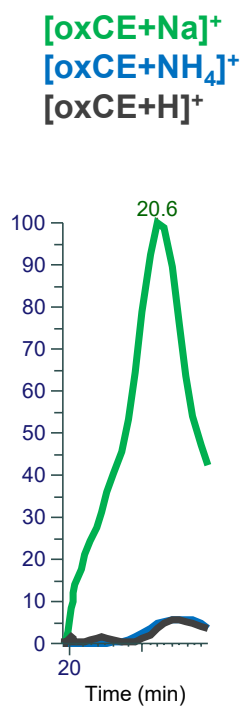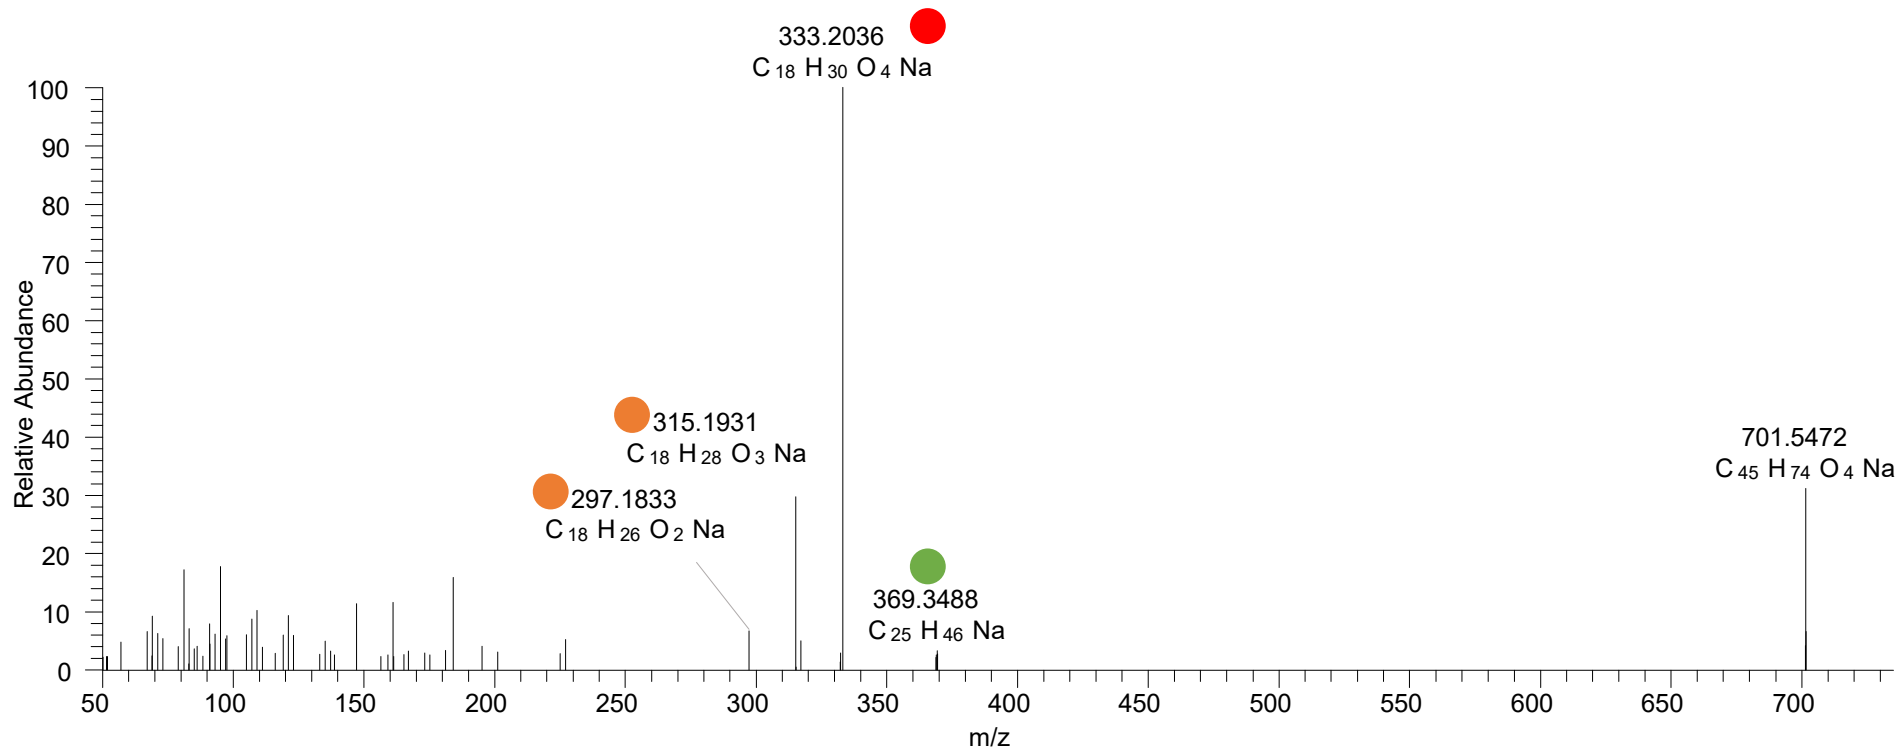

# CE(18:3<OH,O>) RT 21.3

[oxCE+Na]<sup>+</sup>

XIC 701.5480 NL: 2.82E5

- Fragments containing oxFAs
- Fragments related to water loss
- Fragments not containing oxFAs
- Position-specific fragments
- Fragments related to other oxLPPs

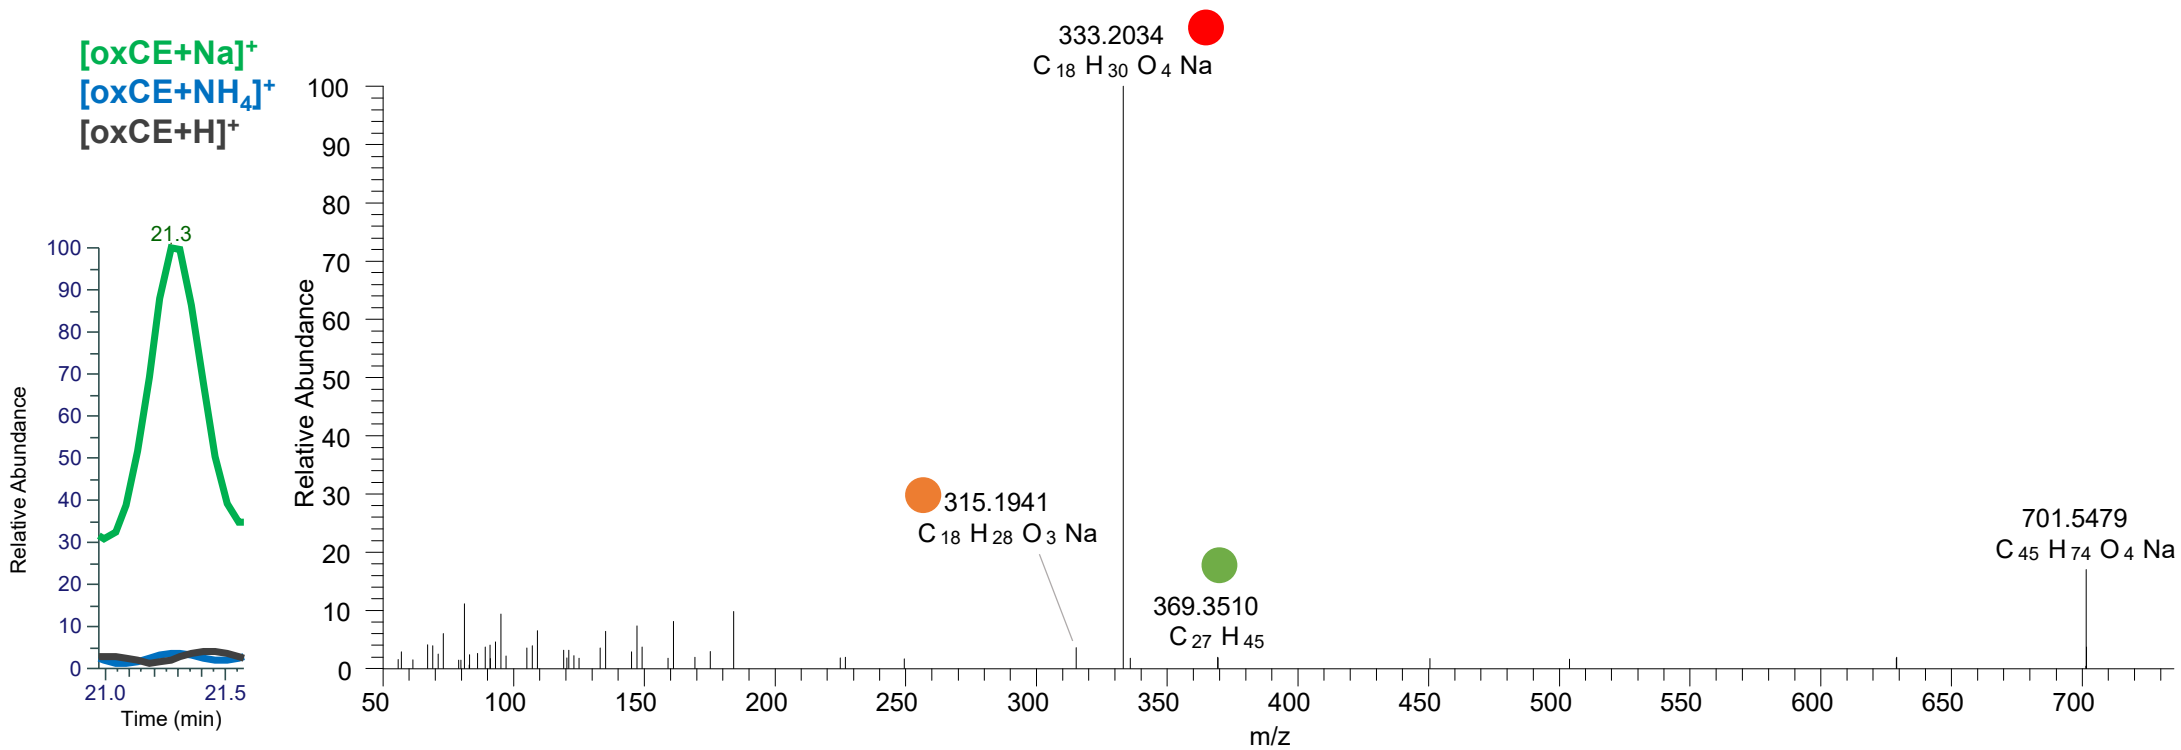

# CE(18:3<OH,O>) RT 21.8

[oxCE+Na]<sup>+</sup>

XIC 701.5480 NL: 2.70E5

- Fragments containing oxFAs
- Fragments related to water loss
- Fragments not containing oxFAs
- Position-specific fragments
- Fragments related to other oxLPPs

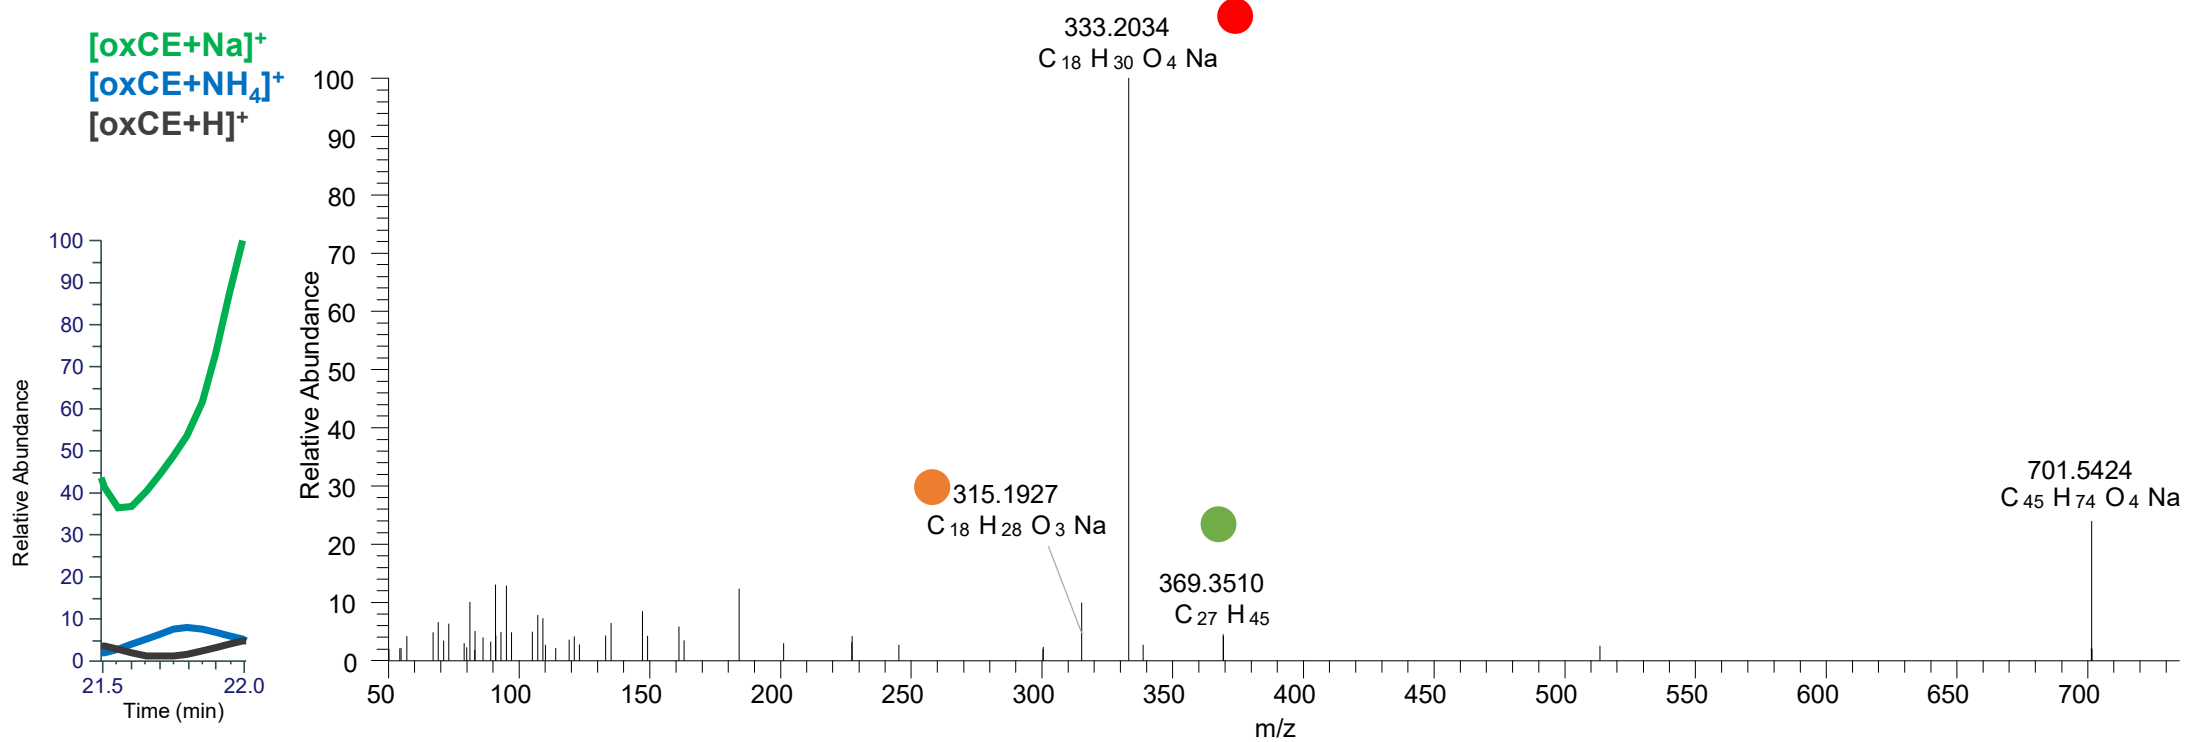

# CE(18:3<OH,O>) RT 22.2

[oxCE+Na]<sup>+</sup>

XIC 701.5480 NL: 3.79E5

- Fragments containing oxFAs
- Fragments related to water loss
- Fragments not containing oxFAs
- Position-specific fragments
- Fragments related to other oxLPPs

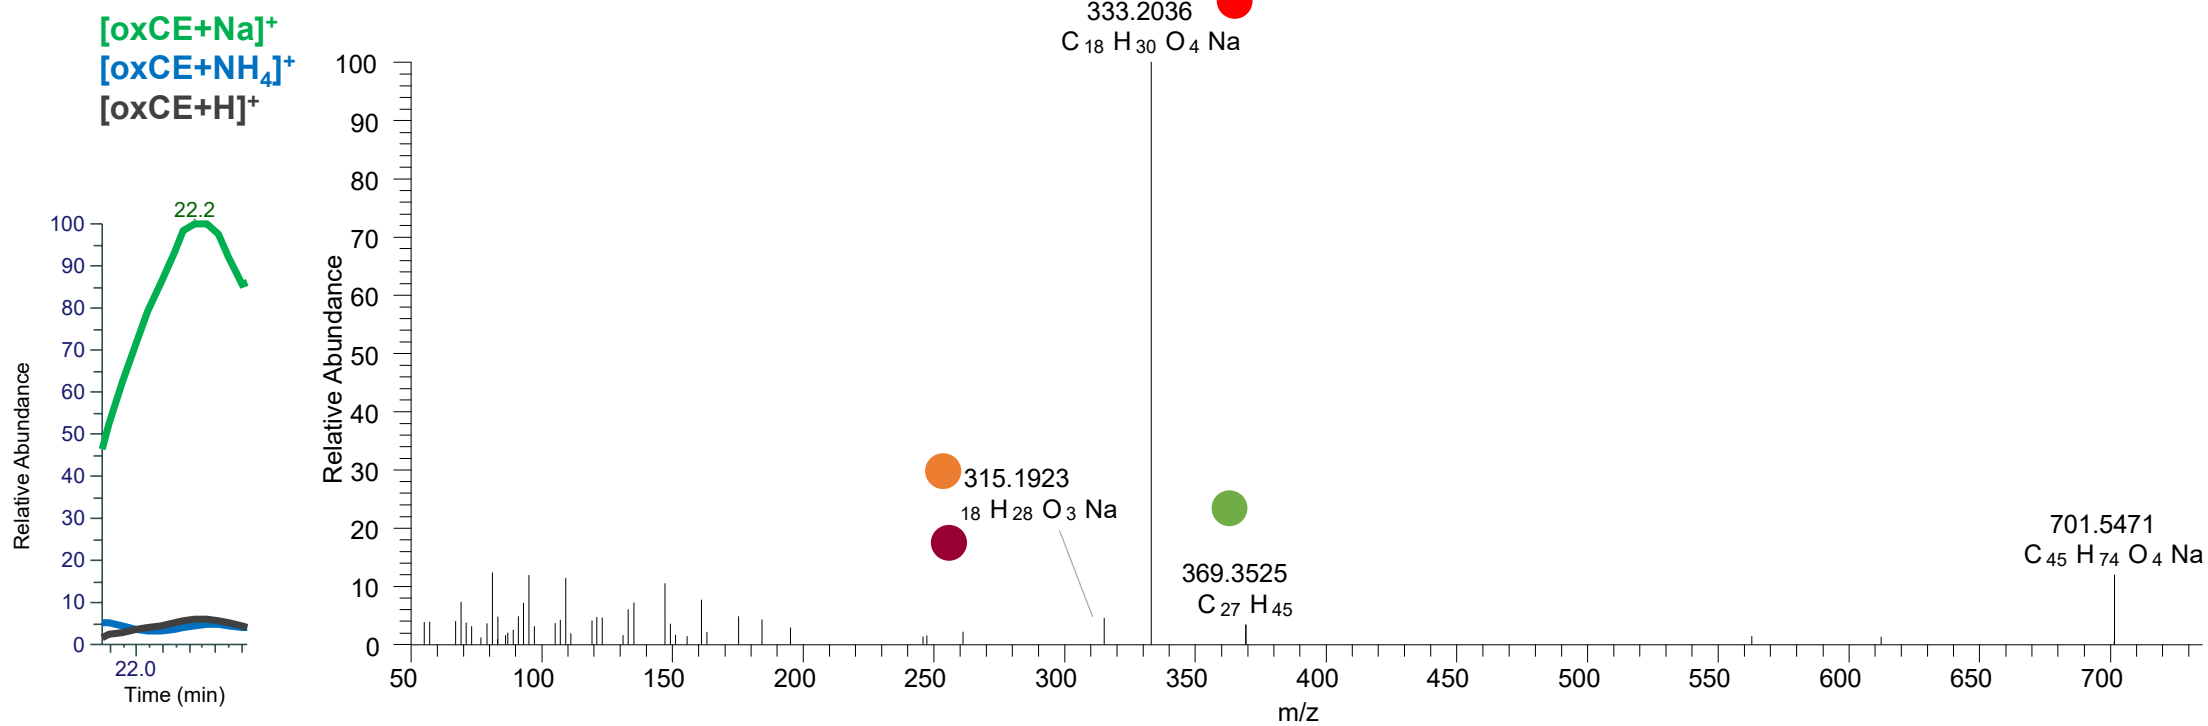

# CE(18:3<OH,O{9}>) RT 22.6

[oxCE+Na]<sup>+</sup>

XIC 701.5480 NL: 6.45E5

- Fragments containing oxFAs
- Fragments related to water loss
- Fragments not containing oxFAs
- Position-specific fragments
- Fragments related to other oxLPPs

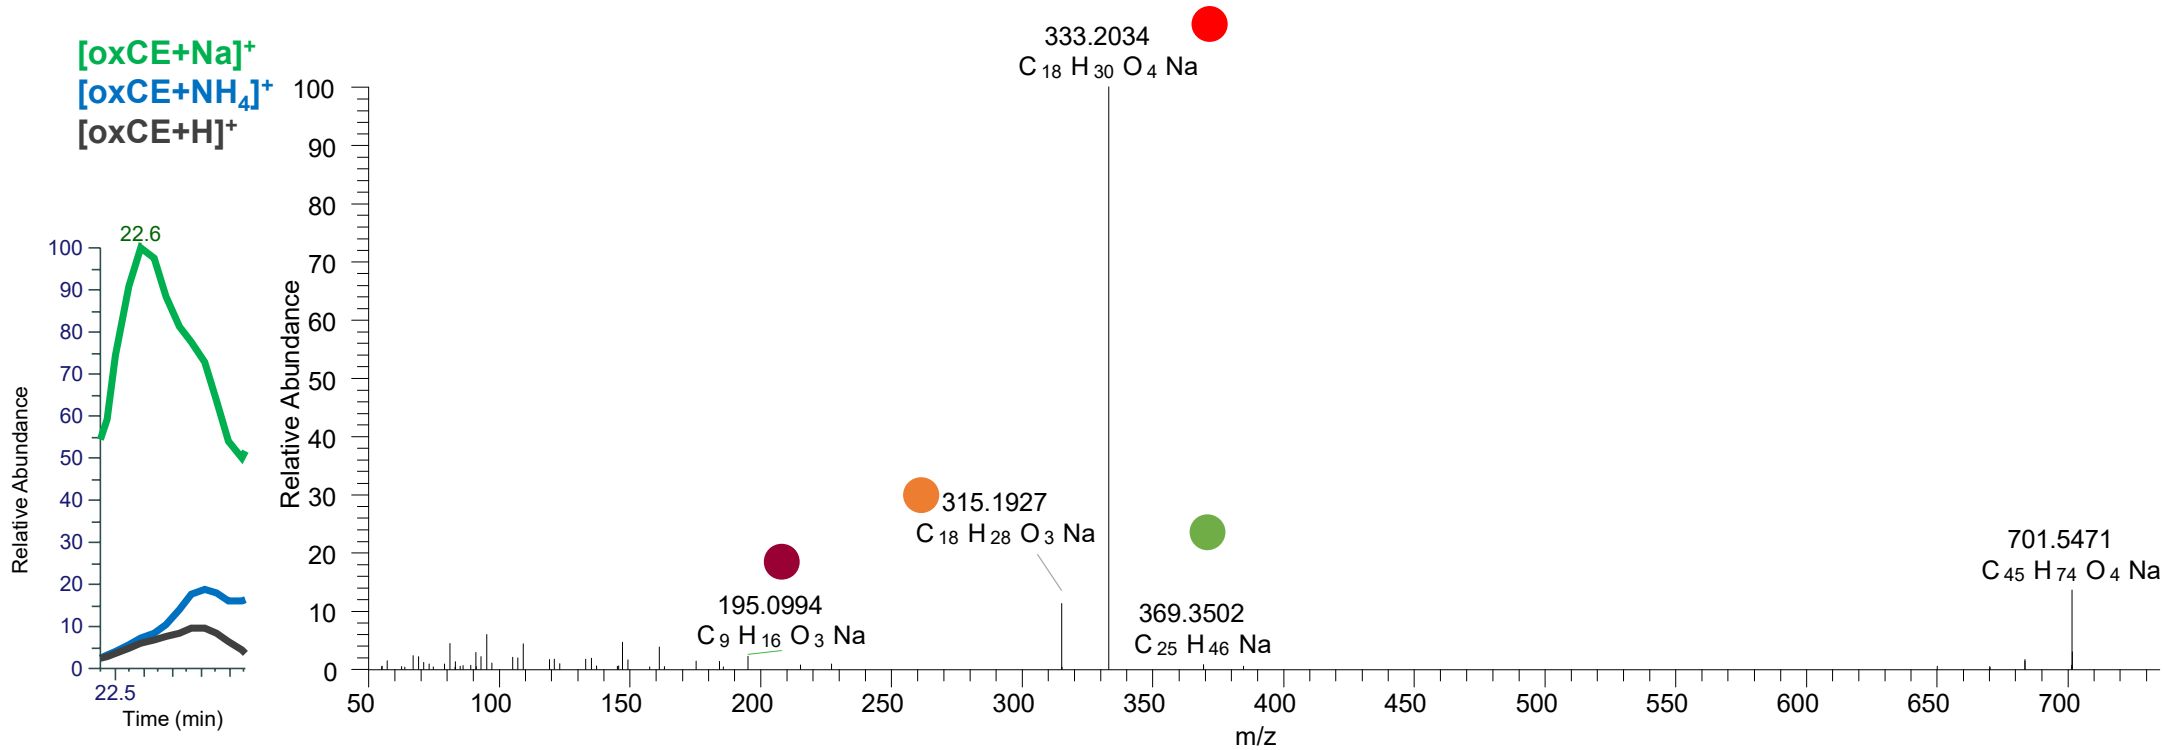



# CE(18:3<OOH{10}>) CE(18:3<OOH{13}>) RT 23.2

[oxCE+Na]<sup>+</sup>

XIC 701.5480 NL: 8.59E5

- Fragments containing oxFAs
- Fragments related to water loss
- Fragments not containing oxFAs
- Position-specific fragments
- Fragments related to other oxLPPs

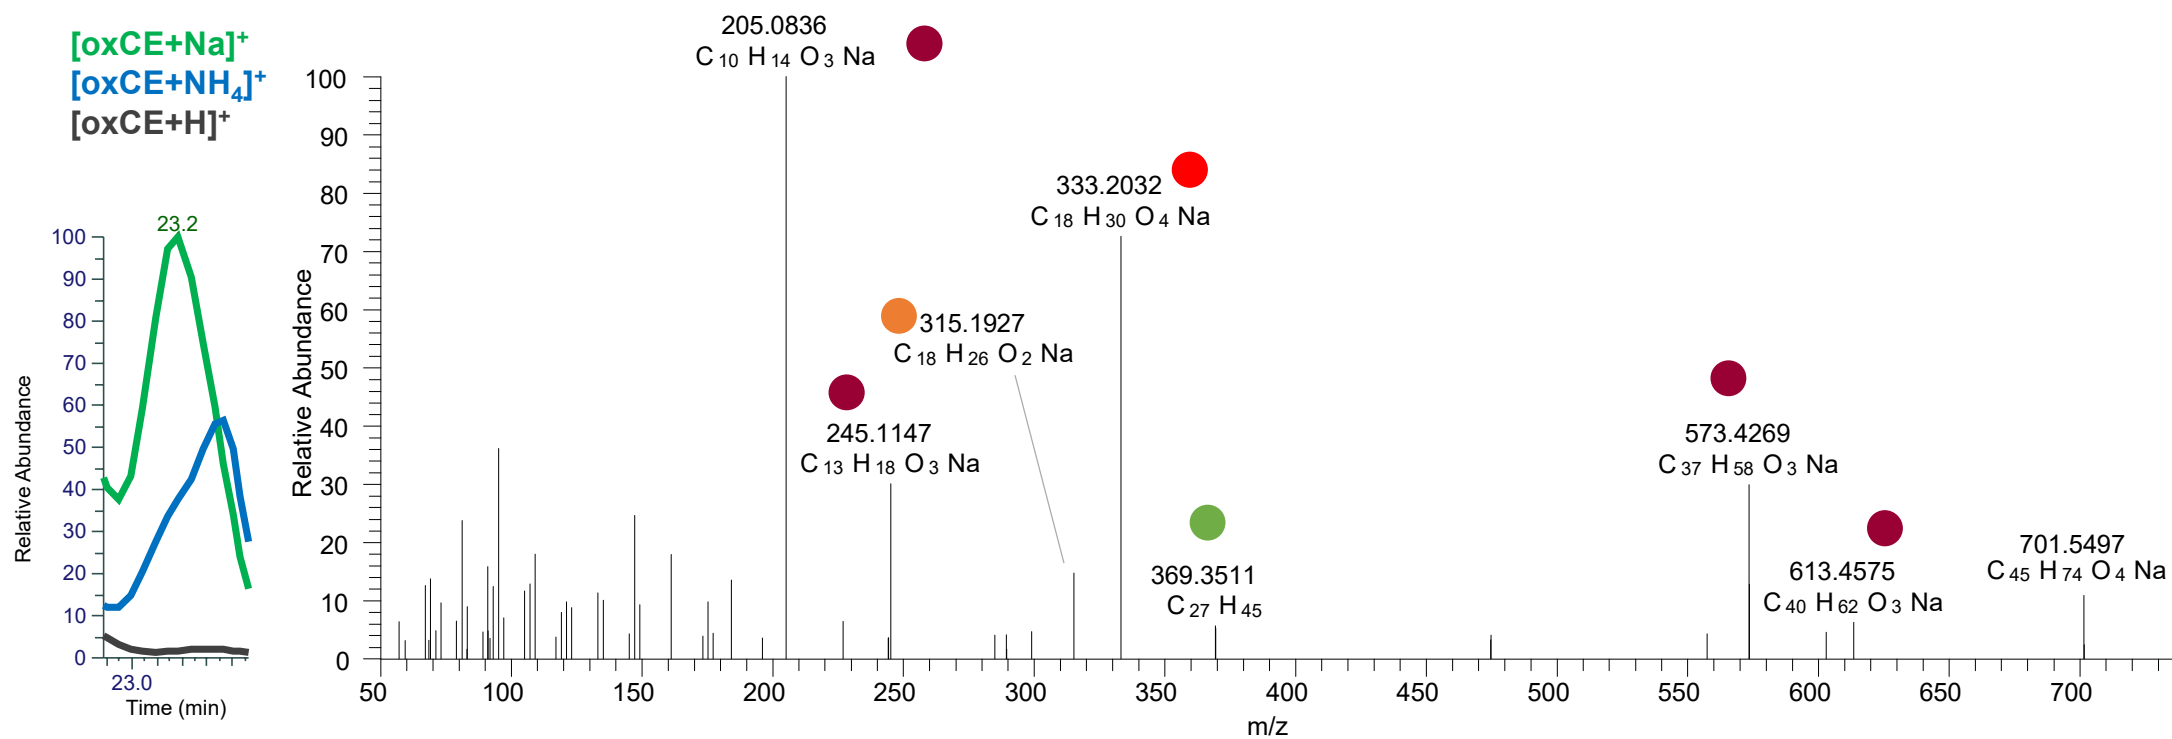

CE(18:3<OOH{10}>)  
CE(18:3<OOH{13}>)  
CE(18:3<OOH{16}>)  
RT 23.3

[oxCE+Na]<sup>+</sup>

XIC 701.5480 NL: 8.59E5

- Fragments containing oxFAs
- Fragments related to water loss
- Fragments not containing oxFAs
- Position-specific fragments
- Fragments related to other oxLPPs

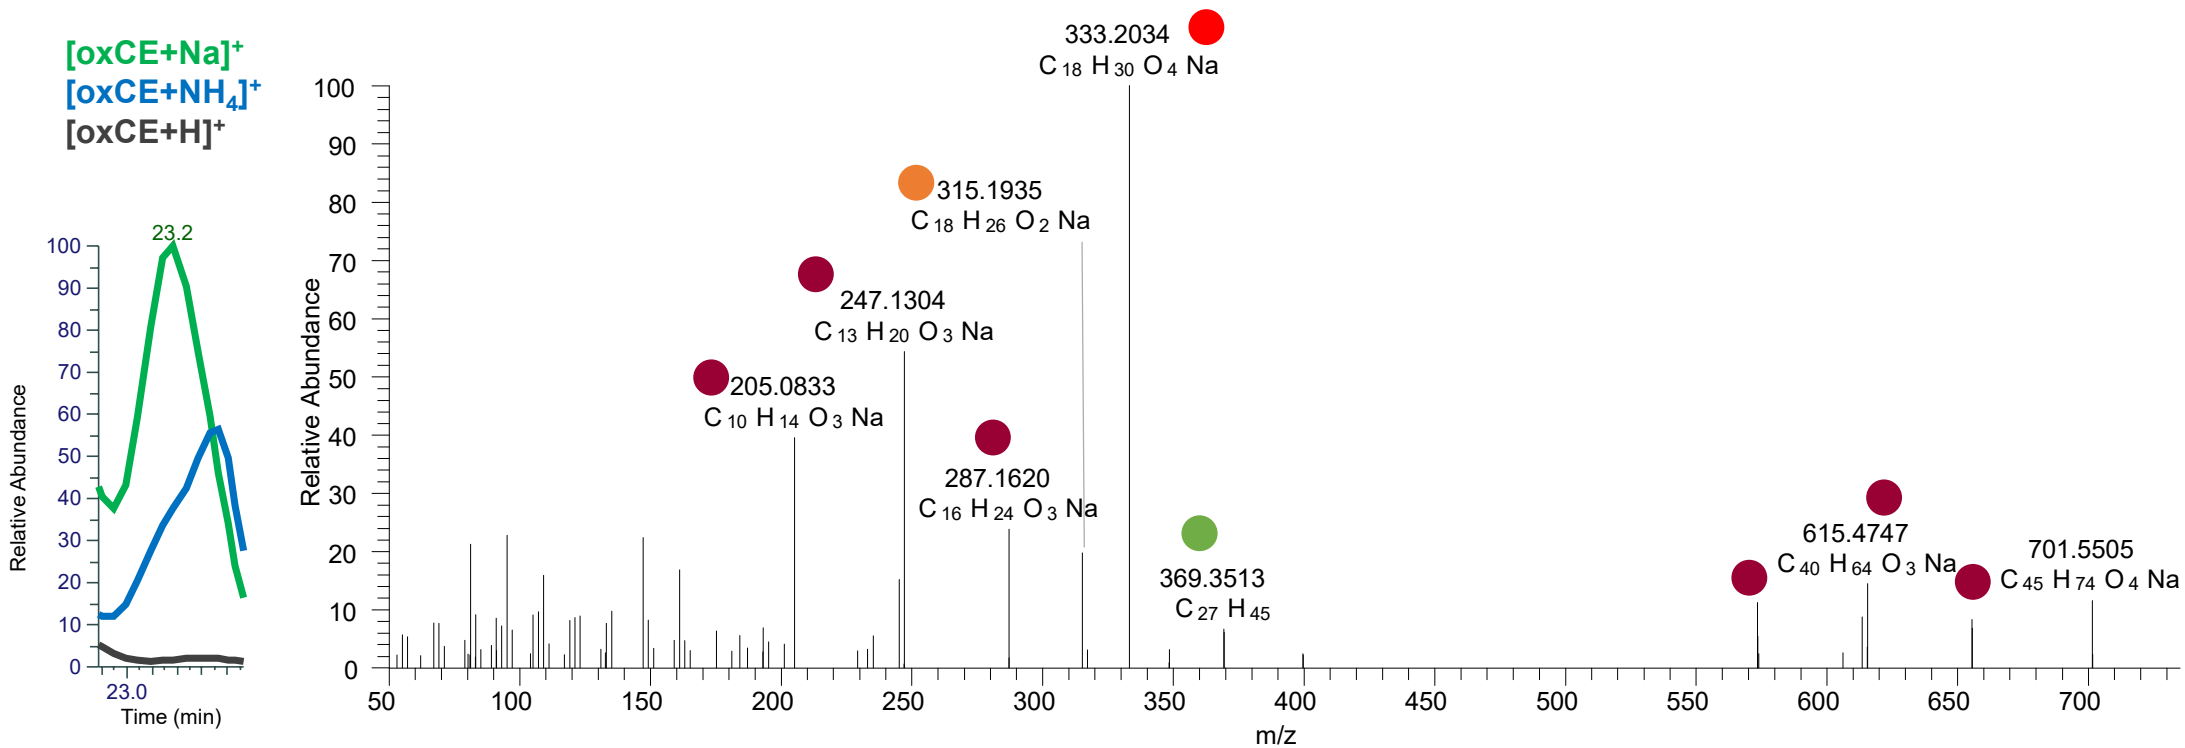

# CE(18:2<2OH>) RT 21.2

[oxCE+Na]<sup>+</sup>

XIC 703.5636 NL: 2.68E5

- Fragments containing oxFAs
- Fragments related to water loss
- Fragments not containing oxFAs
- Position-specific fragments
- Fragments related to other oxLPPs

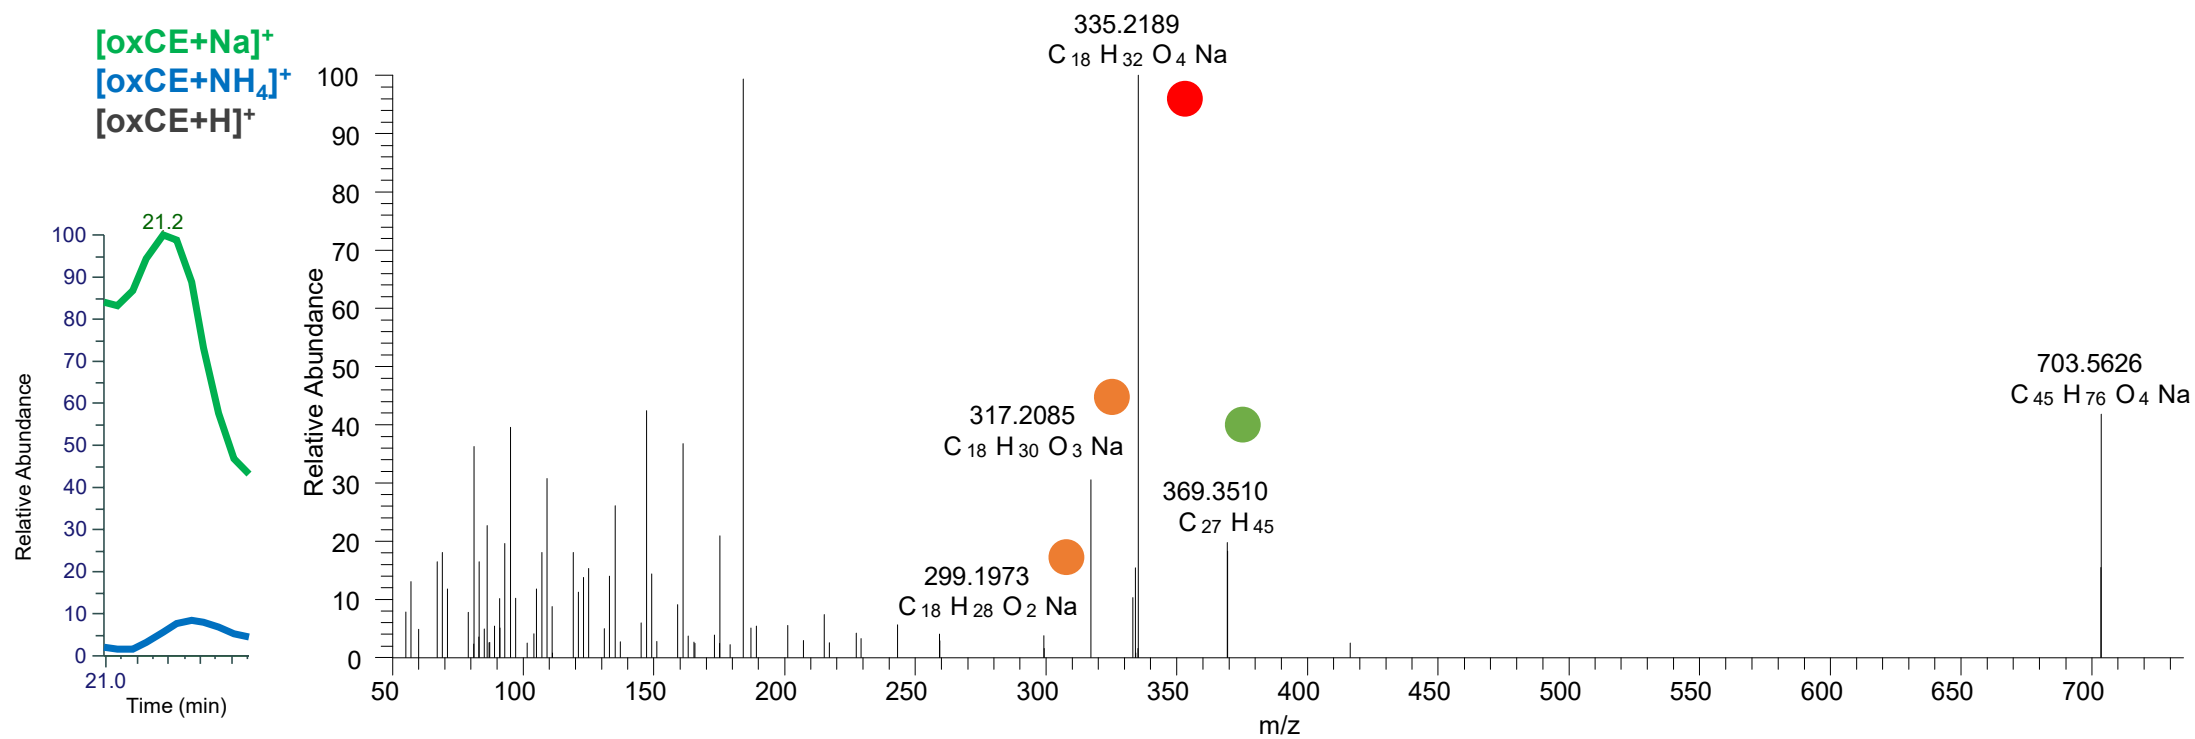

# CE(18:1<OH,ep>) RT 21.7

[oxCE+Na]<sup>+</sup>

XIC 703.5636 NL: 1.77E5

- Fragments containing oxFAs
- Fragments related to water loss
- Fragments not containing oxFAs
- Position-specific fragments
- Fragments related to other oxLPPs

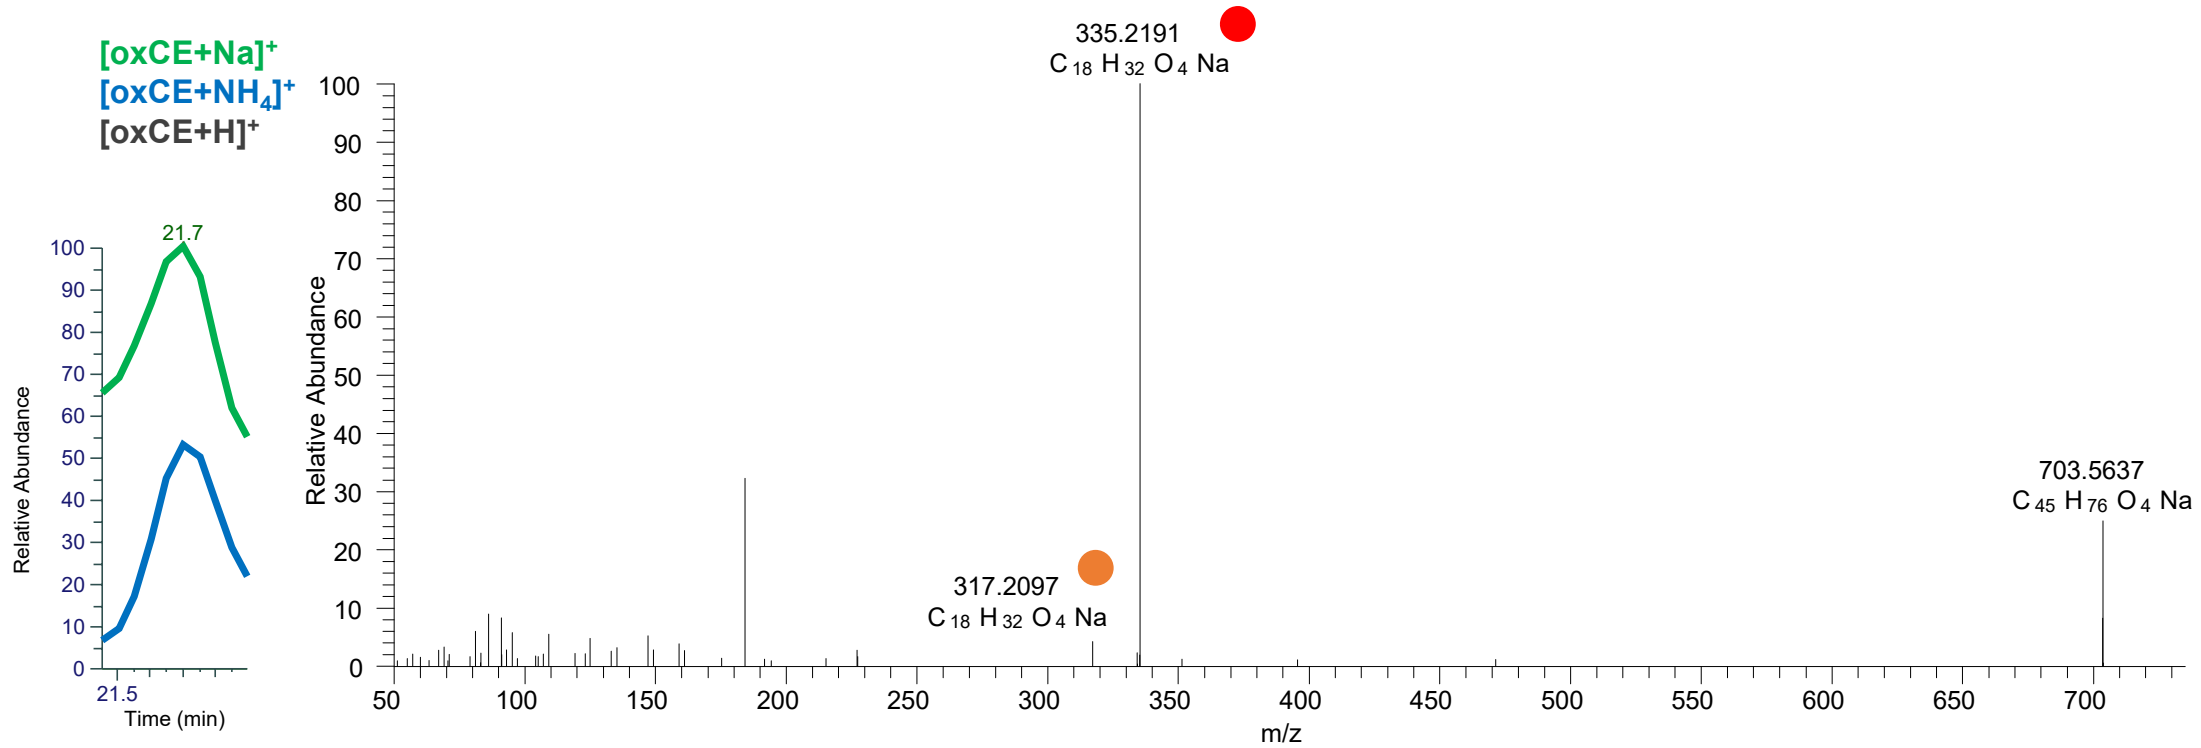

# CE(18:1<OH,ep>) RT 22.2

[oxCE+Na]<sup>+</sup>

XIC 703.5636 NL: 1.45E6

- Fragments containing oxFAs
- Fragments related to water loss
- Fragments not containing oxFAs
- Position-specific fragments
- Fragments related to other oxLPPs

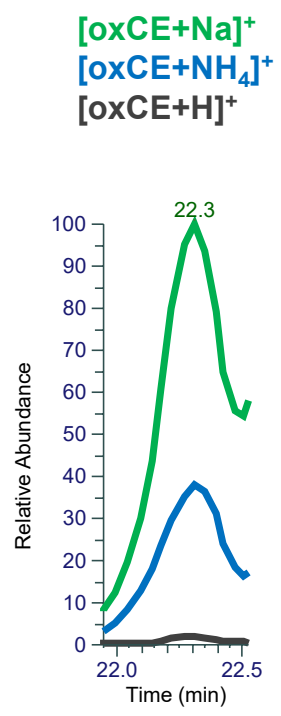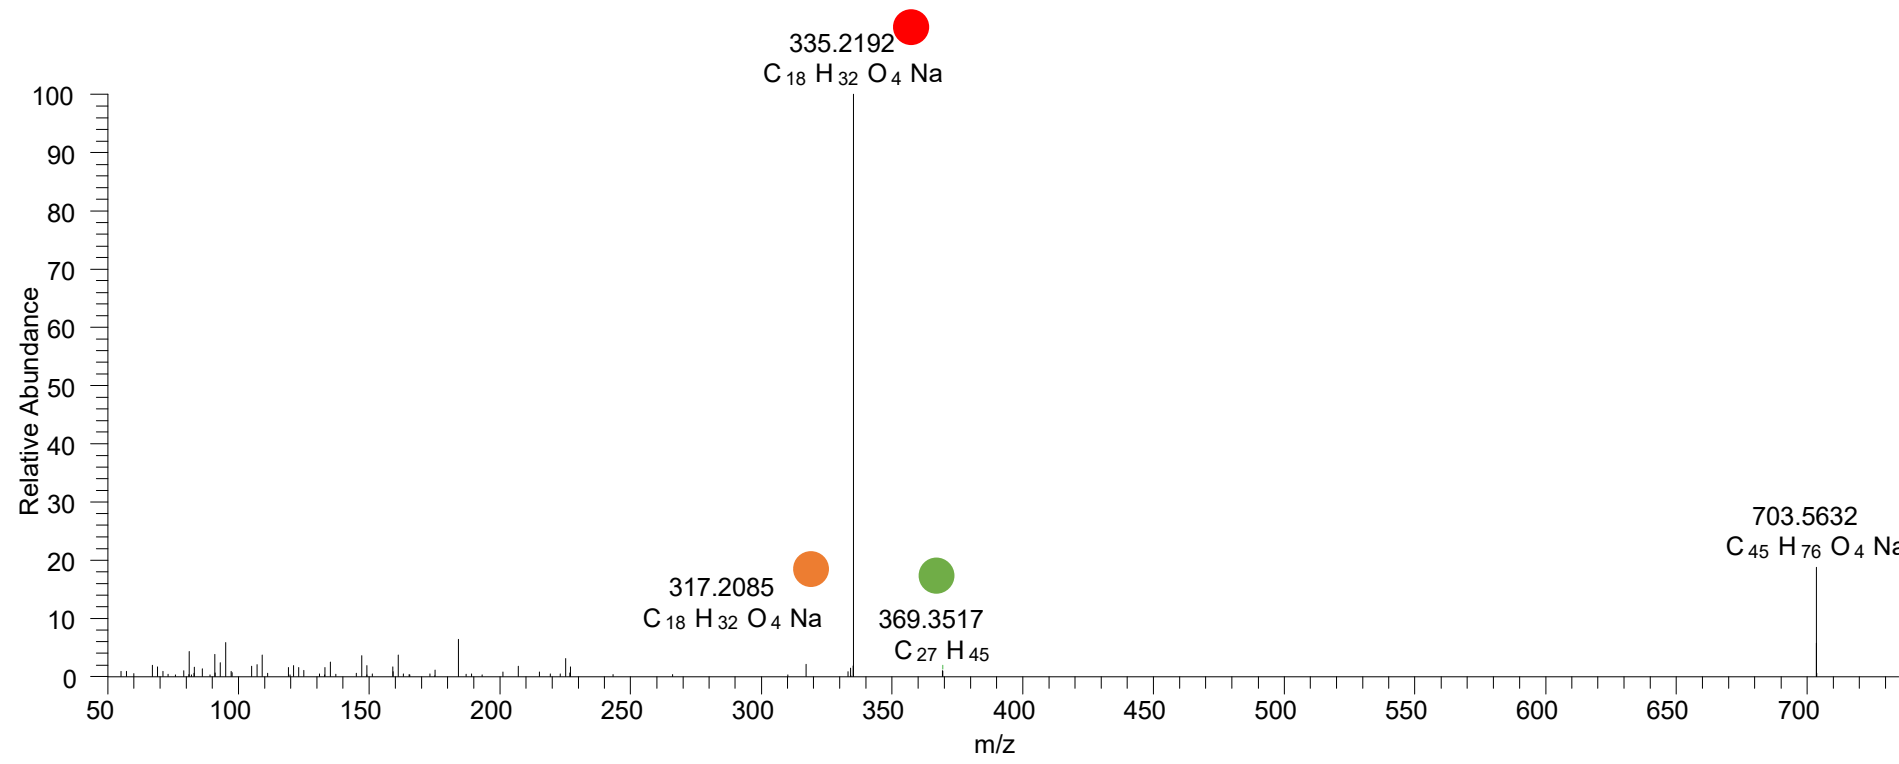

# CE(18:0<2ep>) RT 22.7

[oxCE+Na]<sup>+</sup>

XIC 703.5636 NL: 1.72E6

- Fragments containing oxFAs
- Fragments related to water loss
- Fragments not containing oxFAs
- Position-specific fragments
- Fragments related to other oxLPPs

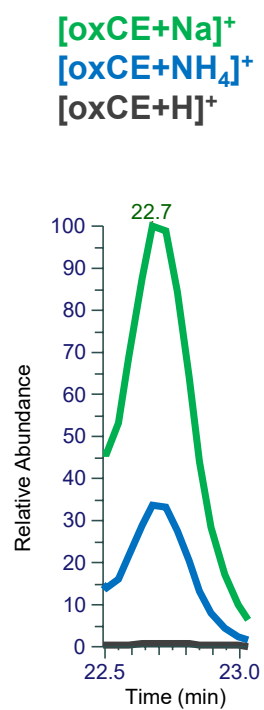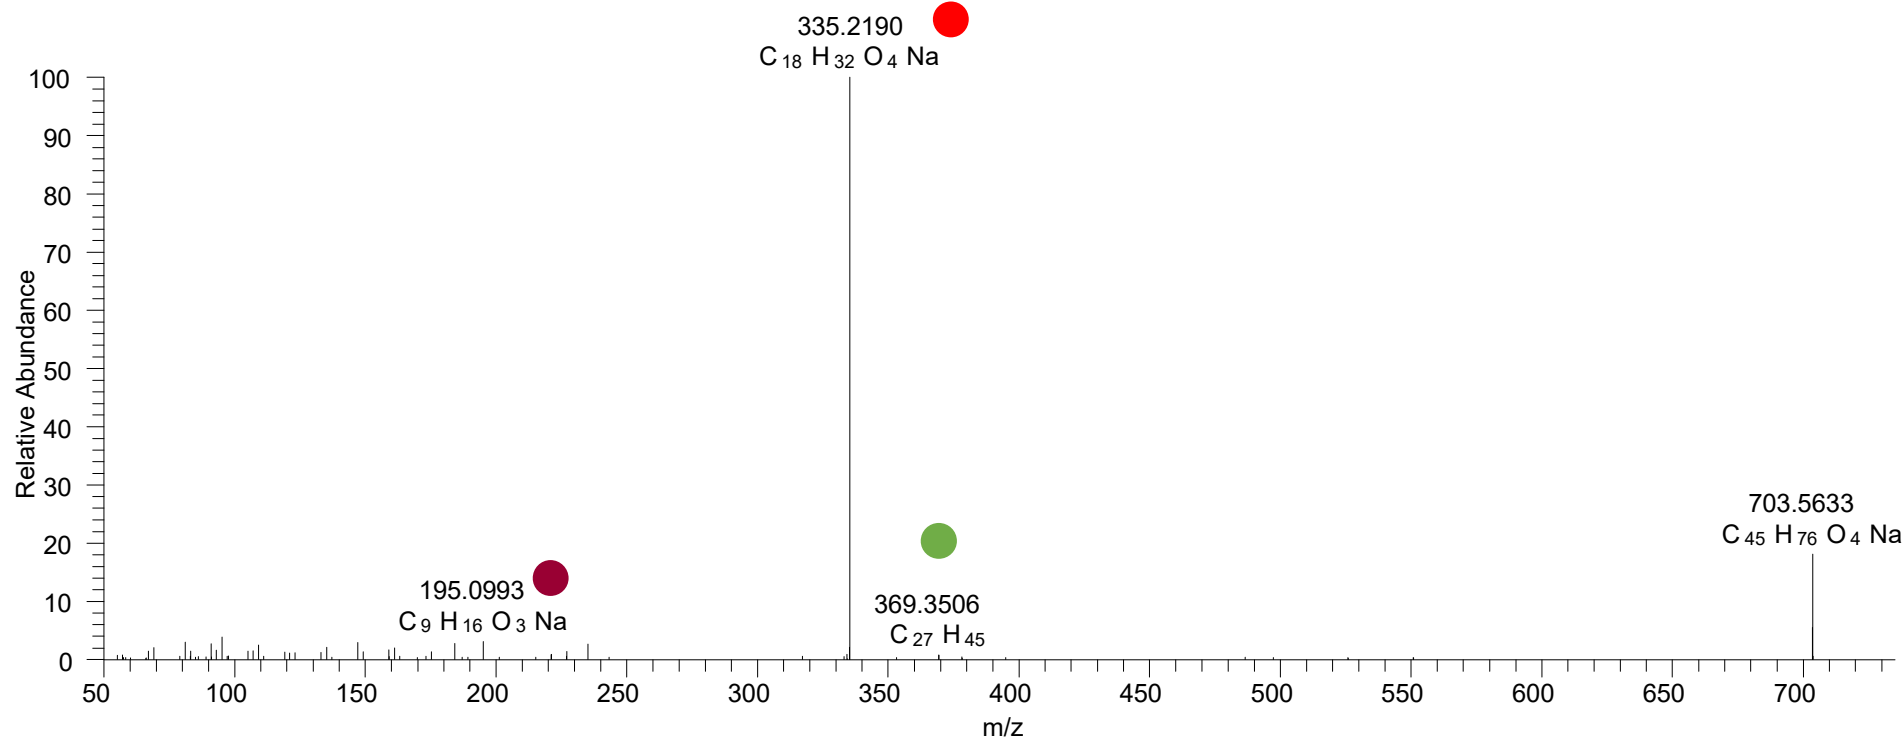

# CE(18:2<OOH{11}>) CE(18:2<OOH{13}>) RT 23.4

[oxCE+Na]<sup>+</sup>

XIC 703.5636 NL: 2.92E6

- Fragments containing oxFAs
- Fragments related to water loss
- Fragments not containing oxFAs
- Position-specific fragments
- Fragments related to other oxLPPs

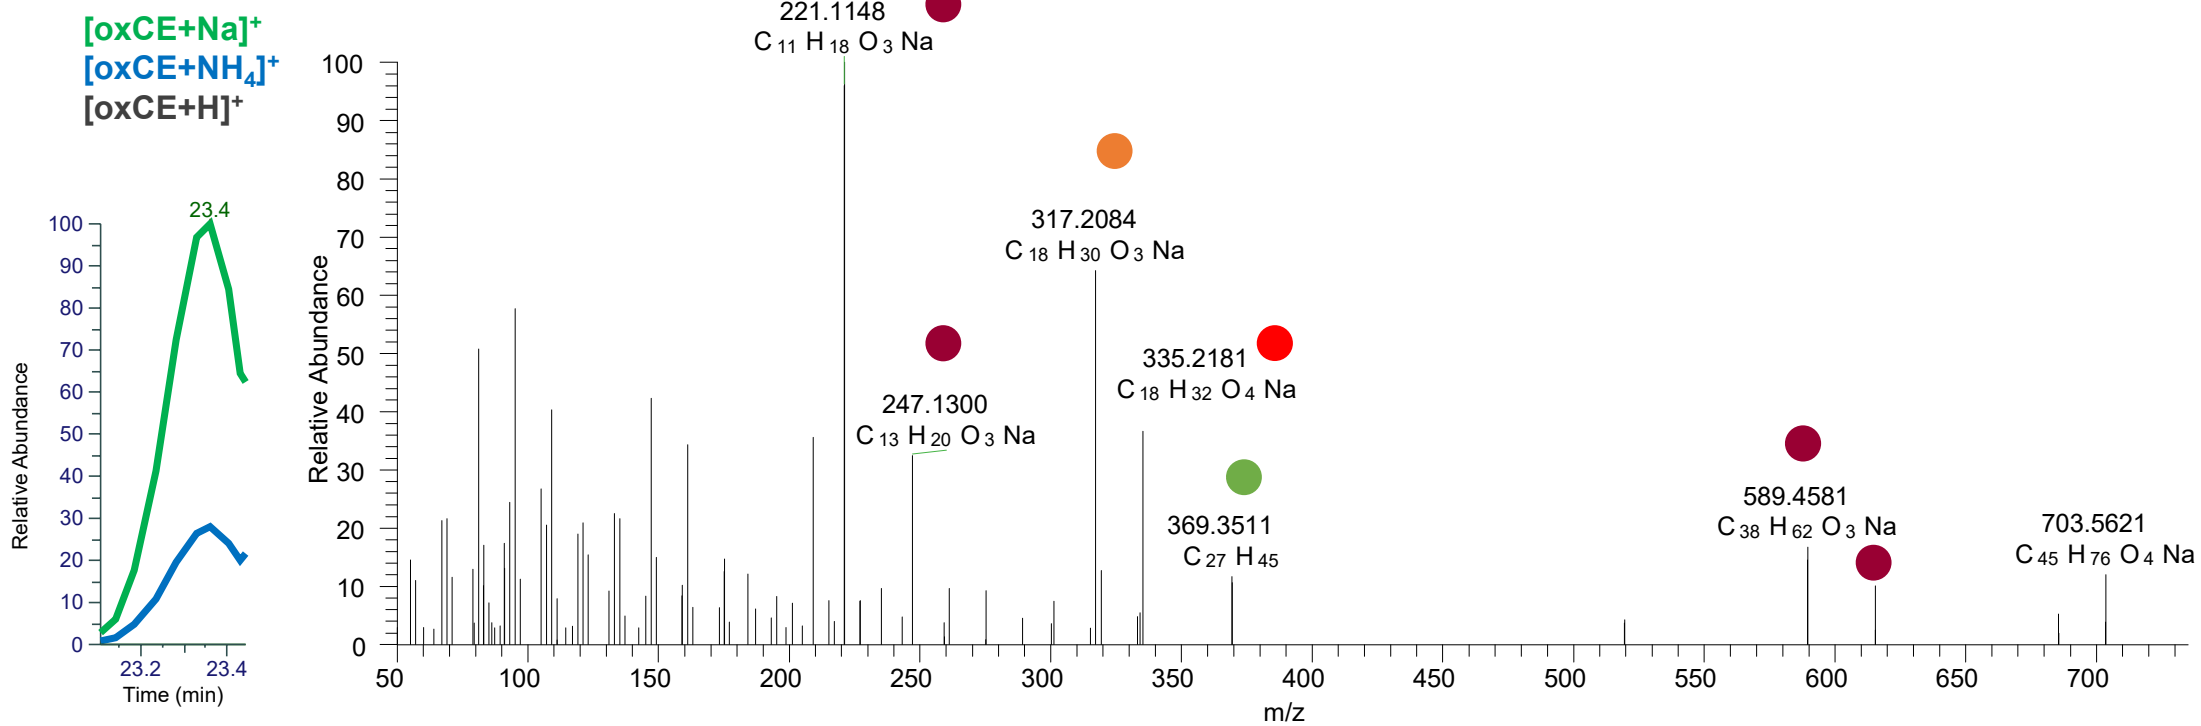

# CE(18:2<OOH{9}>) CE(18:2<OOH{13}>) RT 23.6

[oxCE+Na]<sup>+</sup>

XIC 703.5636 NL: 1.36E7

- Fragments containing oxFAs
- Fragments related to water loss
- Fragments not containing oxFAs
- Position-specific fragments
- Fragments related to other oxLPPs

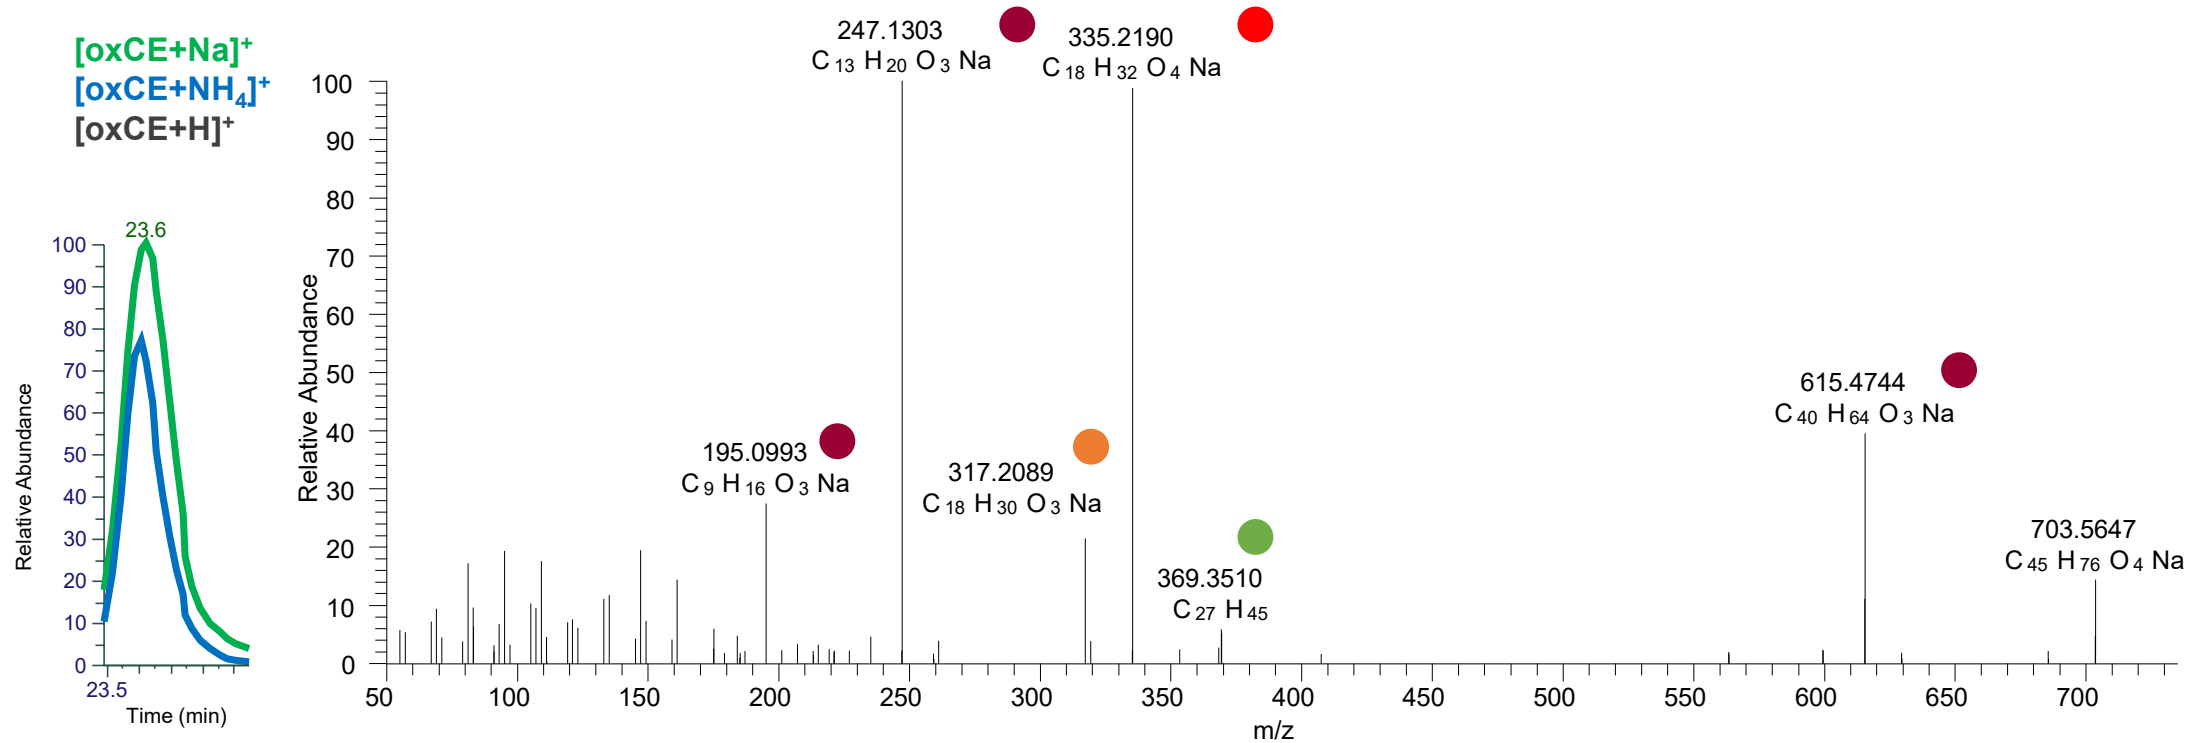



# CE(18:1<2O>)

RT 23.1

[oxCE+Na]<sup>+</sup>

XIC 705.5792 NL: 1.36E4

- Fragments containing oxFAs
- Fragments related to water loss
- Fragments not containing oxFAs
- Position-specific fragments
- Fragments related to other oxLPPs

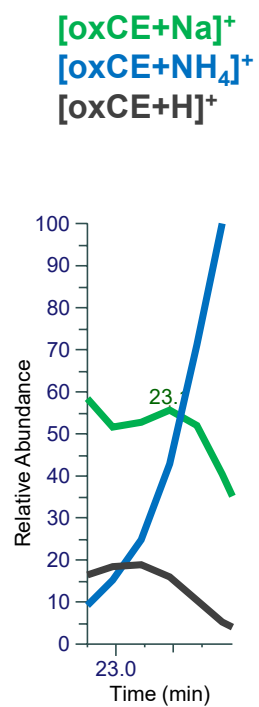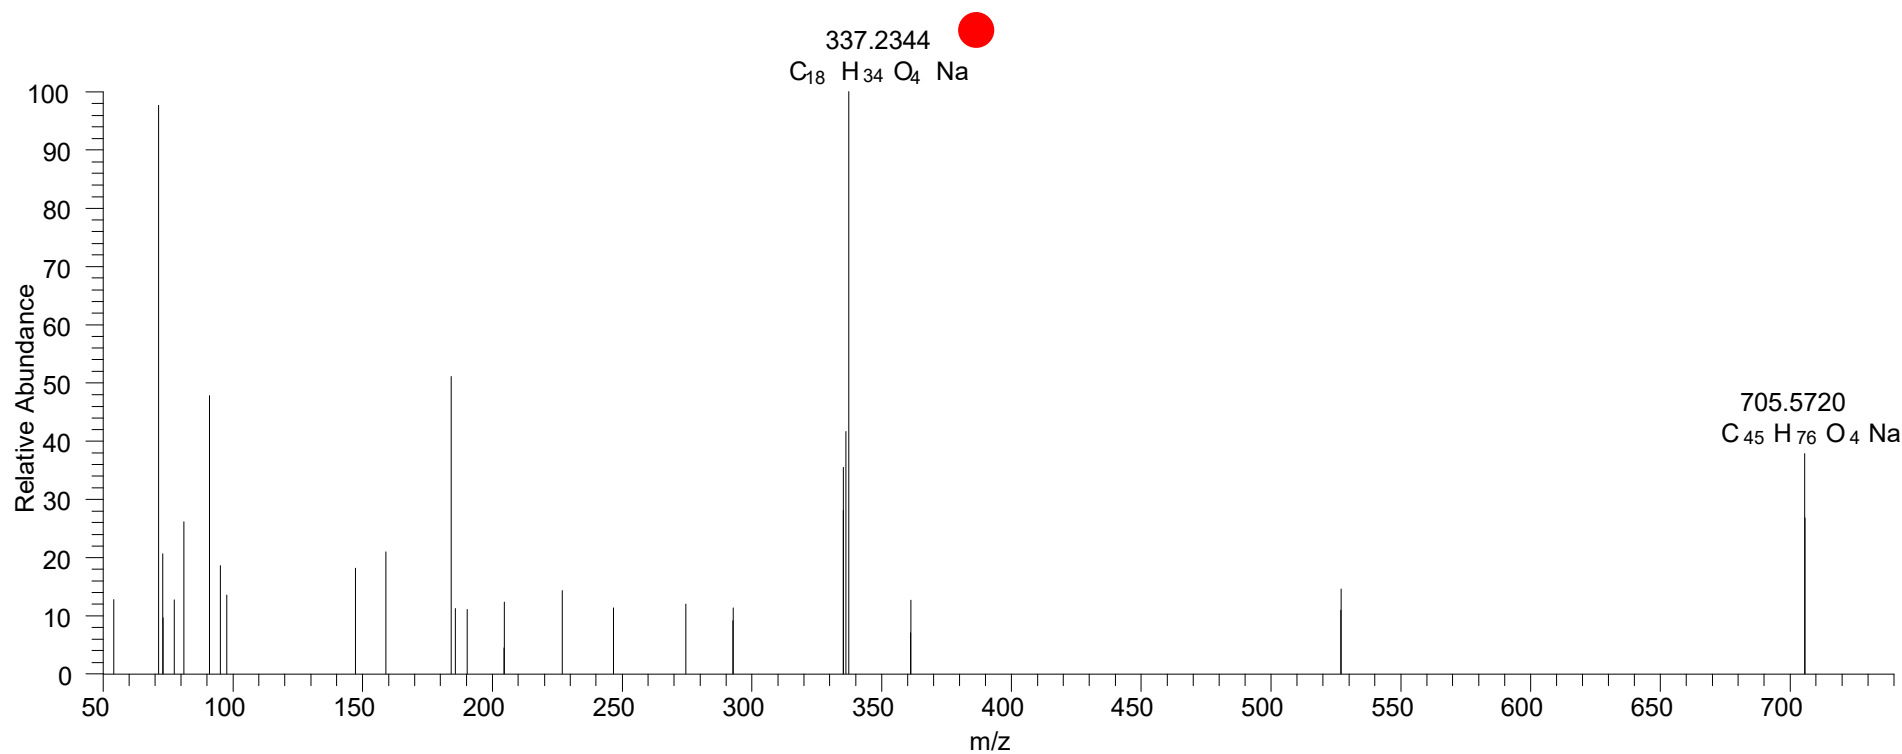

CE(18:1<OOH{10}>)  
 CE(18:1<OOH{11}>)  
 CE(18:1<OOH{12}>)  
 CE(18:1<OOH{13}>)  
 RT 24.0

[oxCE+Na]<sup>+</sup>

XIC 705.5792 NL: 4.12E5

● Fragments containing oxFAs

● Fragments related to water loss

● Fragments not containing oxFAs

● Position-specific fragments

● Fragments related to other oxLPPs

● Fragments containing oxChol

[oxCE+Na]<sup>+</sup>  
 [oxCE+NH<sub>4</sub>]<sup>+</sup>  
 [oxCE+H]<sup>+</sup>

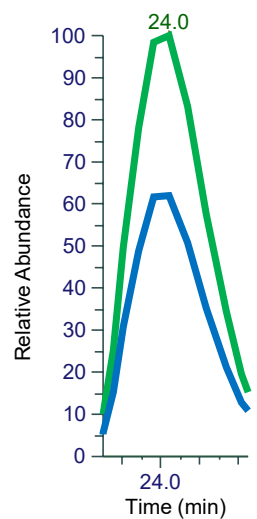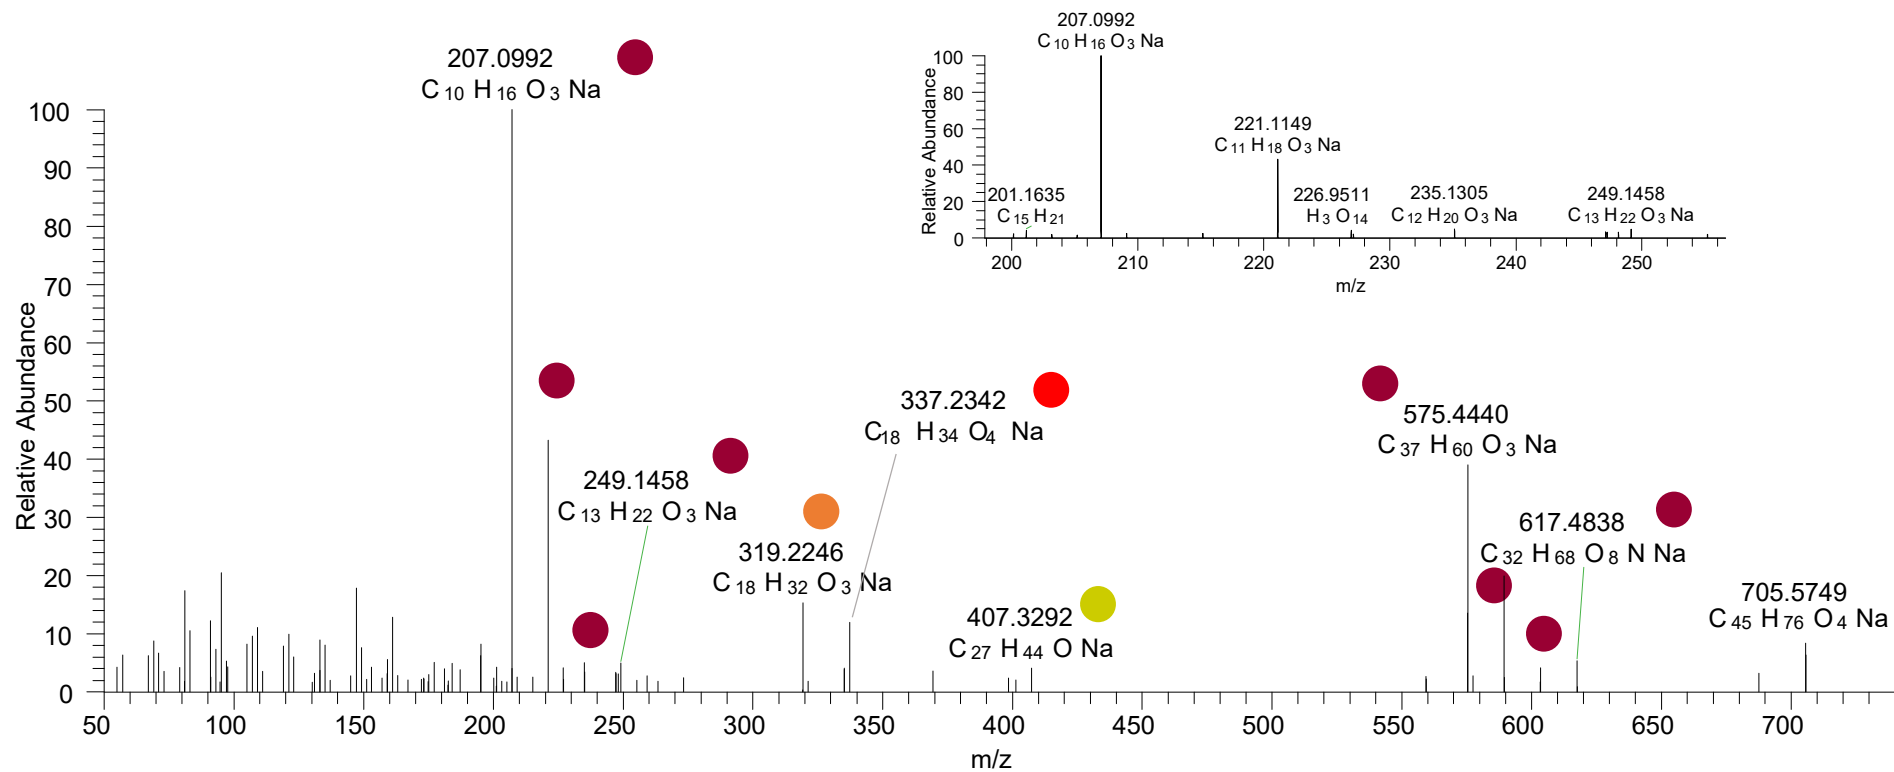

# CE(20:5<OH>) RT 23.1

[oxCE+Na]<sup>+</sup>

XIC 709.5530 NL: 9.57E5

- Fragments containing oxFAs
- Fragments related to water loss
- Fragments not containing oxFAs
- Position-specific fragments
- Fragments related to other oxLPPs
- Fragments containing oxChol

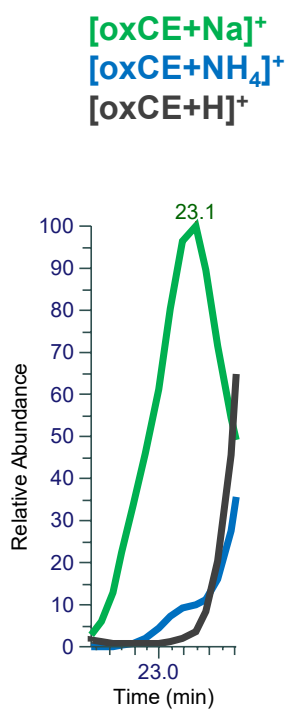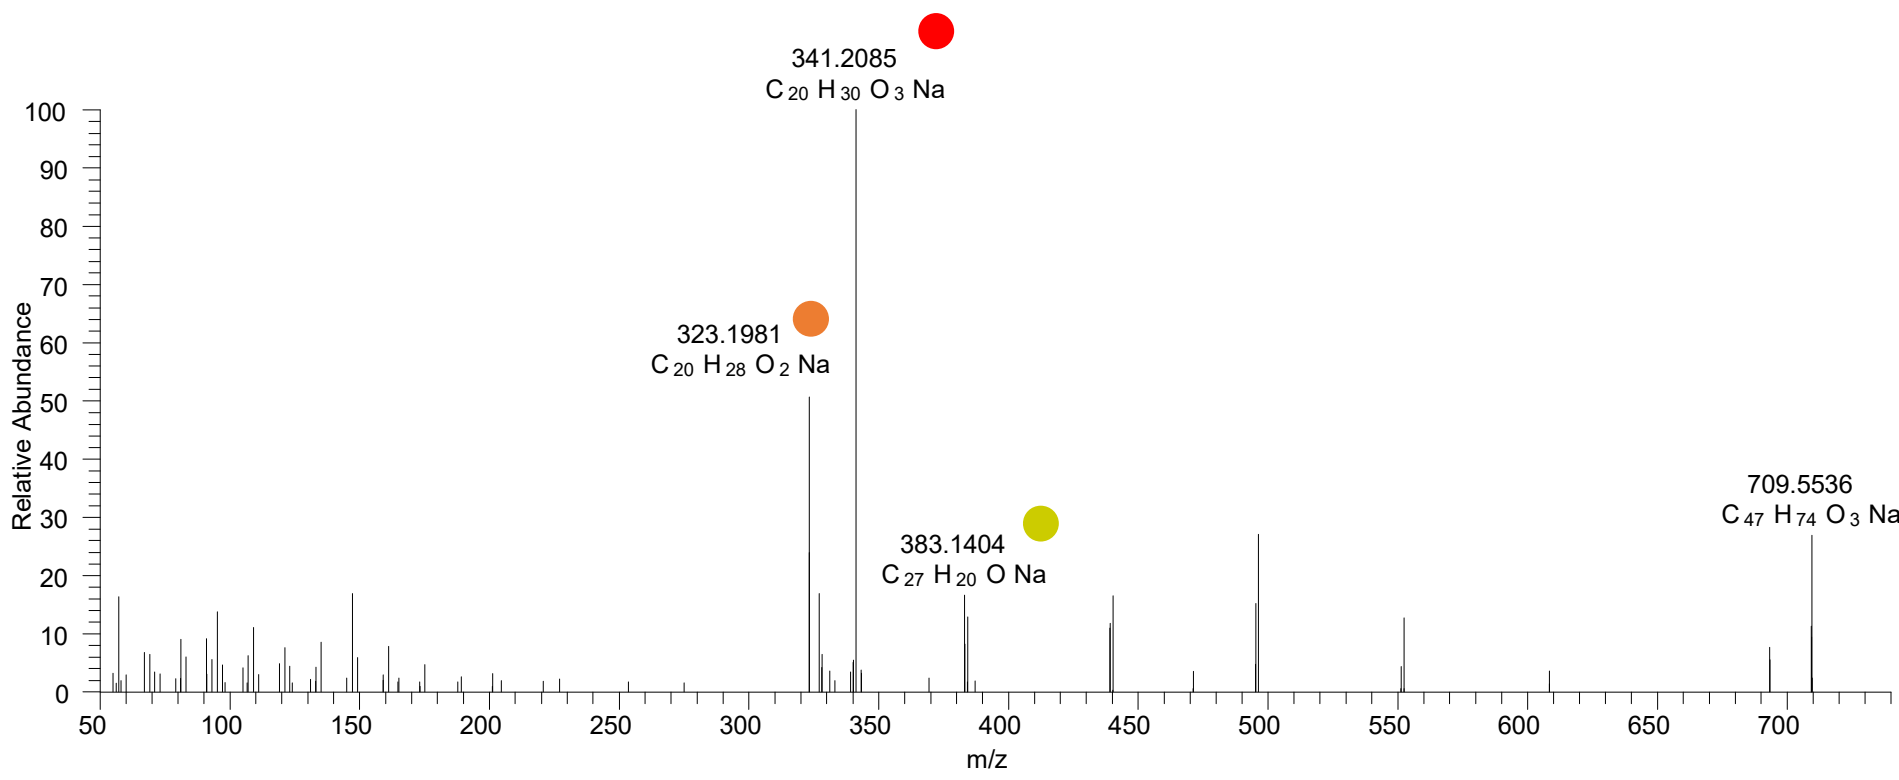

# CE(20:4<OH>) RT 23.6

[oxCE+Na]<sup>+</sup>

XIC 711.5687 NL: 2.94E6

- Fragments containing oxFAs
- Fragments related to water loss
- Fragments not containing oxFAs
- Position-specific fragments
- Fragments related to other oxLPPs

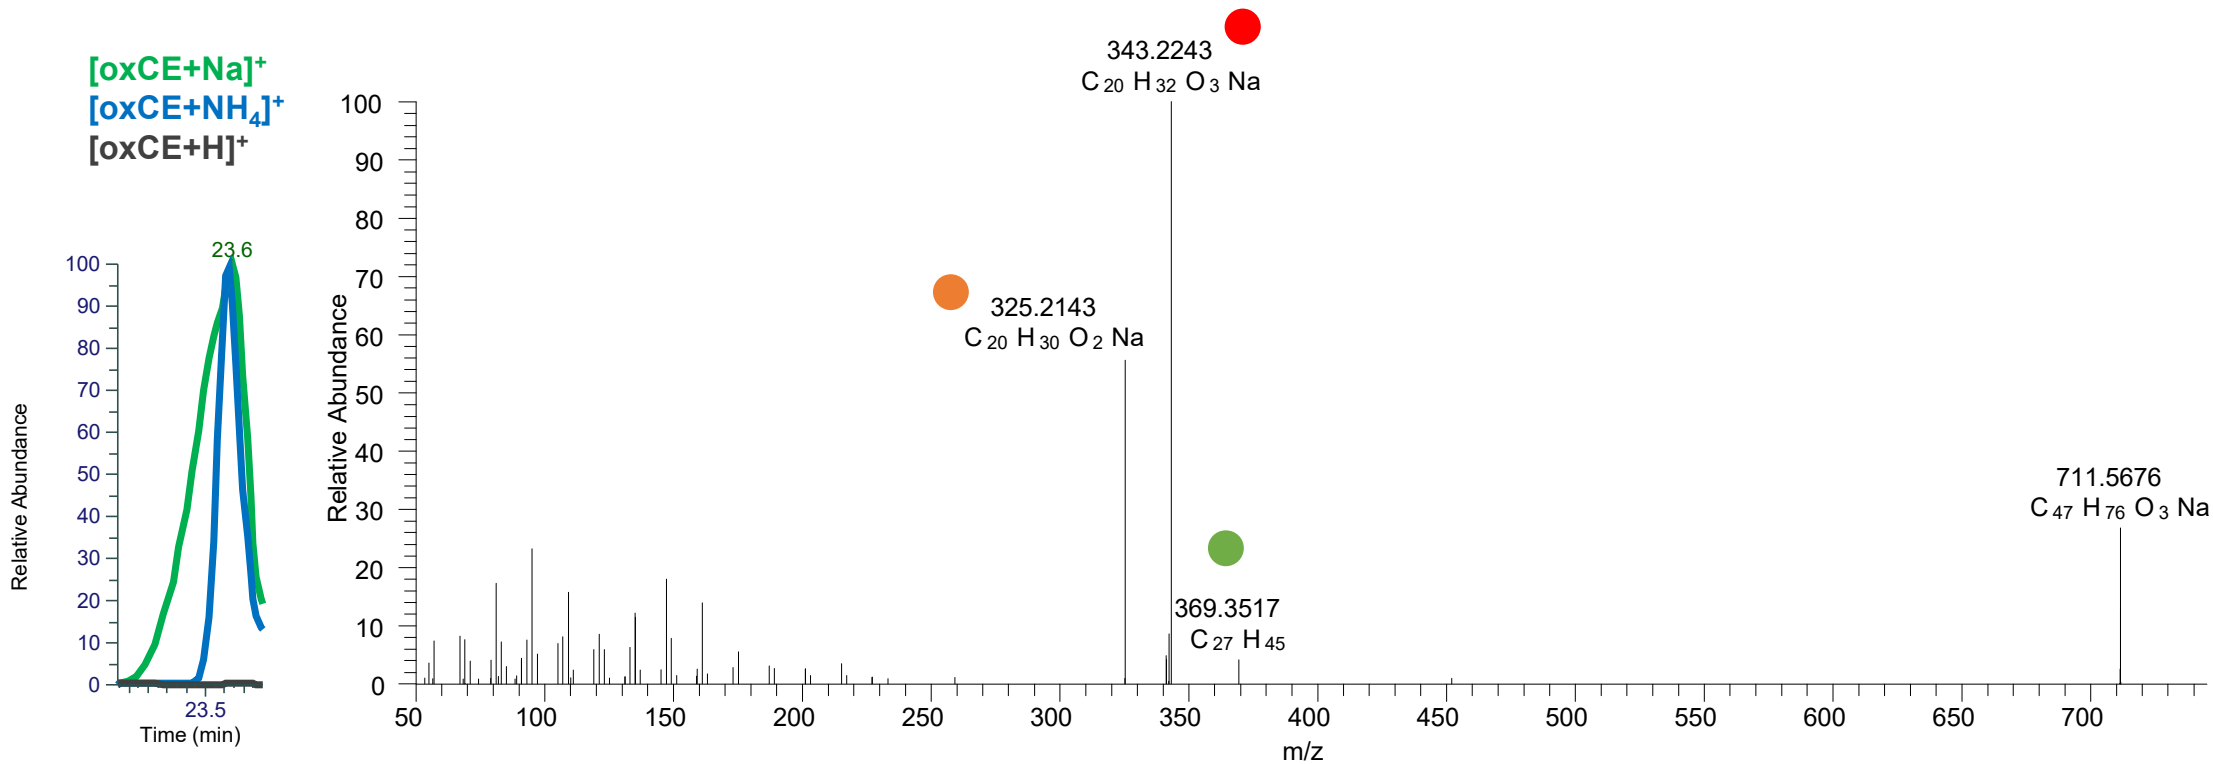

# CE(20:3<oxo>) RT 24.2

[oxCE+Na]<sup>+</sup>

XIC 711.5687 NL: 1.30E5

- Fragments containing oxFAs
- Fragments related to water loss
- Fragments not containing oxFAs
- Position-specific fragments
- Fragments related to other oxLPPs

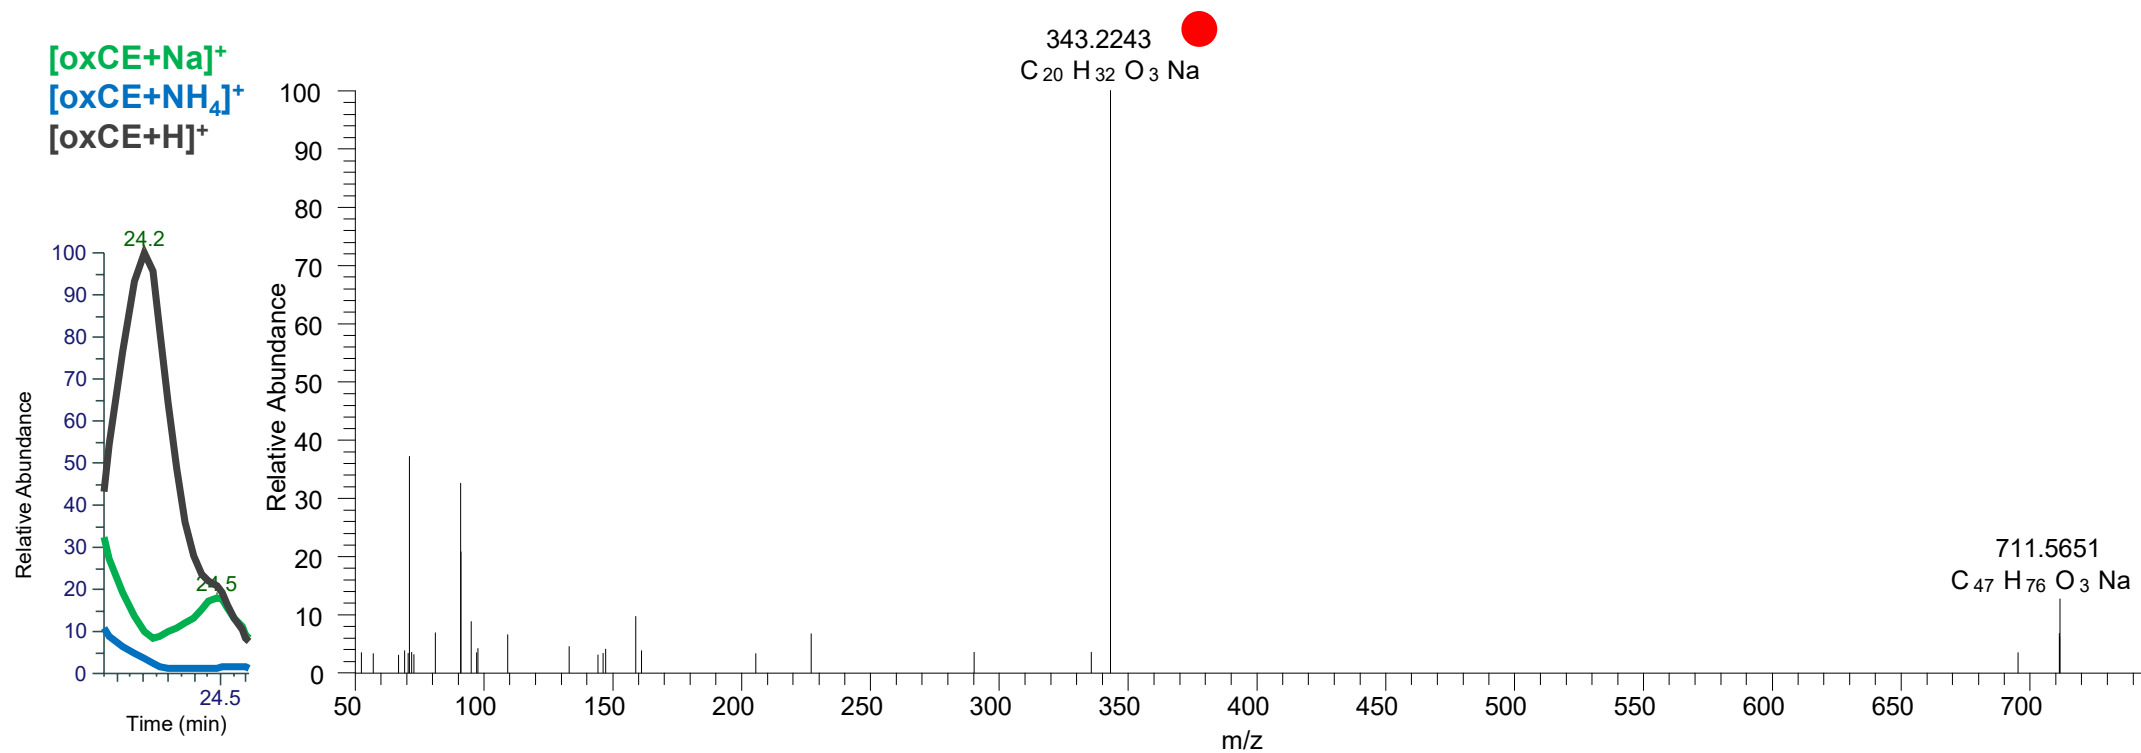

# CE(20:4<O>) RT 25.0

[oxCE+Na]<sup>+</sup>

XIC 711.5687 NL: 5.25E4

- Fragments containing oxFAs
- Fragments related to water loss
- Fragments not containing oxFAs
- Position-specific fragments
- Fragments related to other oxLPPs

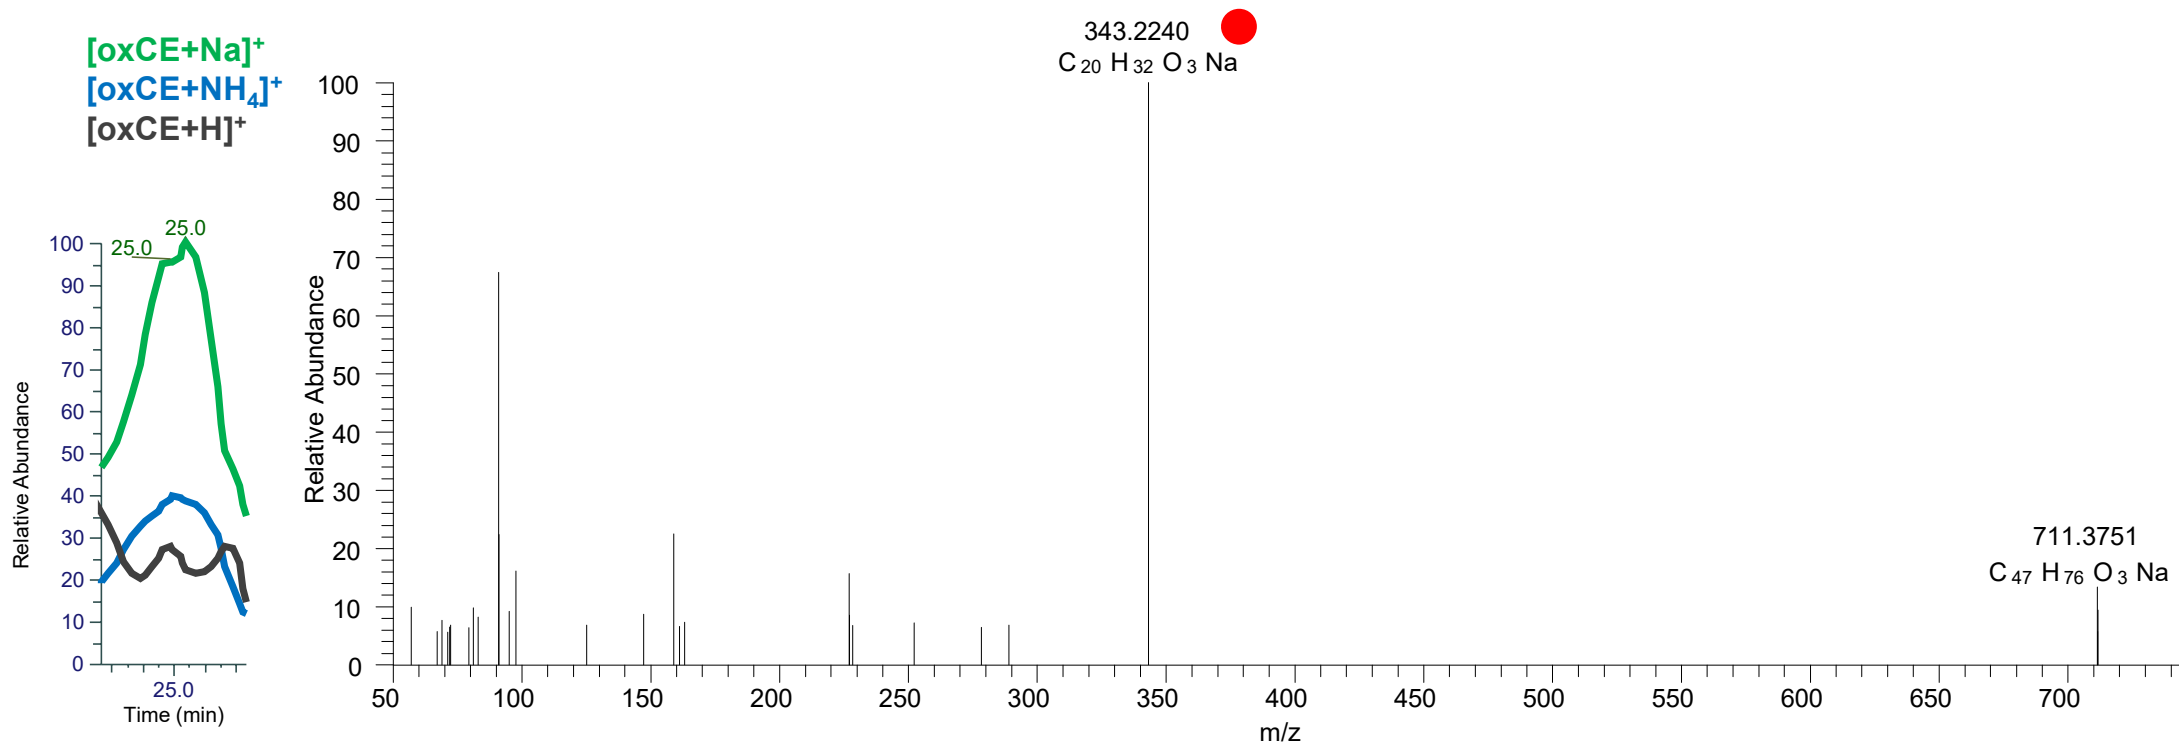

# CE(20:3<OH>) RT 24.2

[oxCE+Na]<sup>+</sup>

XIC 713.5843 NL: 1.43E6

- Fragments containing oxFAs
- Fragments related to water loss
- Fragments not containing oxFAs
- Position-specific fragments
- Fragments related to other oxLPPs

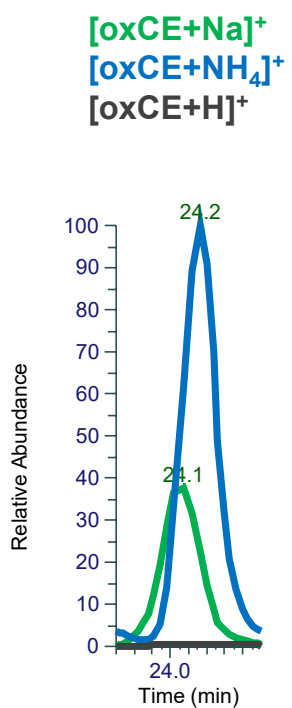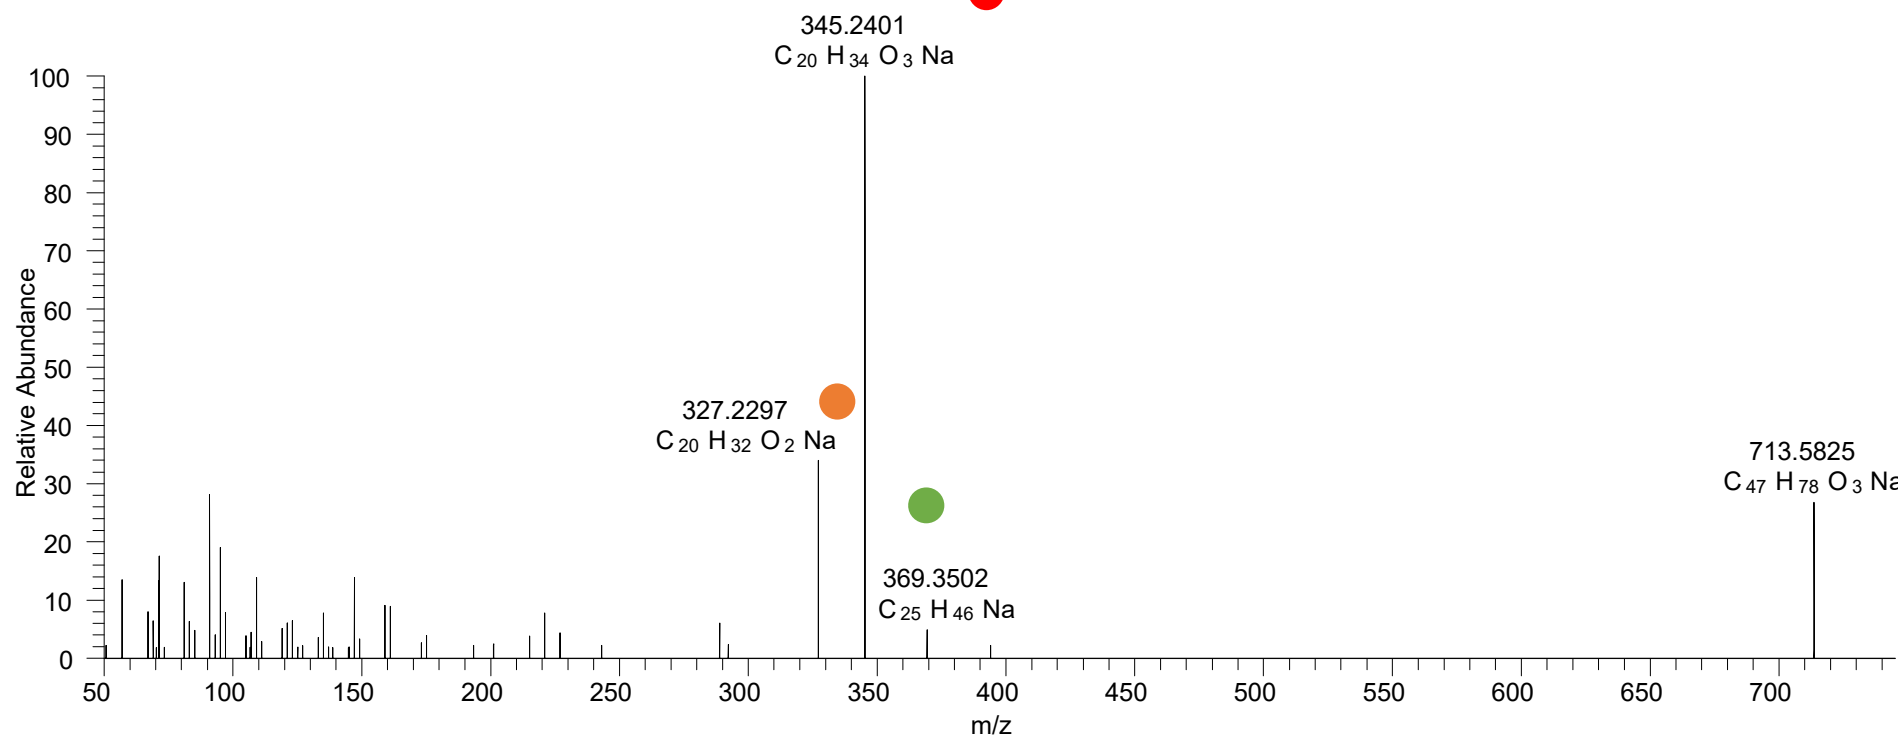

# CE(20:2<OH>) RT 24.4

[oxCE+Na]<sup>+</sup>

XIC 715.6005 NL: 4.37E4

- Fragments containing oxFAs
- Fragments related to water loss
- Fragments not containing oxFAs
- Position-specific fragments
- Fragments related to other oxLPPs

[oxCE+Na]<sup>+</sup>  
[oxCE+NH<sub>4</sub>]<sup>+</sup>  
[oxCE+H]<sup>+</sup>

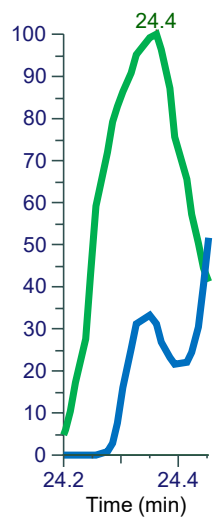

Relative Abundance

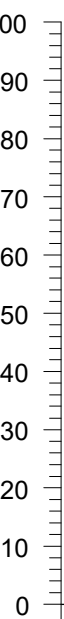

100  
90  
80  
70  
60  
50  
40  
30  
20  
10  
0

50 100 150 200 250 300 350 400 450 500 550 600 650 700 750

347.2555  
C<sub>20</sub>H<sub>36</sub>O<sub>3</sub>Na

329.2445  
C<sub>20</sub>H<sub>34</sub>O<sub>2</sub>Na

715.5910  
C<sub>47</sub>H<sub>80</sub>O<sub>3</sub>Na

m/z

285.9895

329.2445  
C<sub>20</sub>H<sub>34</sub>O<sub>2</sub>Na

347.2555  
C<sub>20</sub>H<sub>36</sub>O<sub>3</sub>Na

715.5910  
C<sub>47</sub>H<sub>80</sub>O<sub>3</sub>Na

Relative Abundance

100  
80  
60  
40  
20  
0

280 290 300 310 320 330 340 350 360 370

m/z

285.9895

329.2445  
C<sub>20</sub>H<sub>34</sub>O<sub>2</sub>Na

347.2555  
C<sub>20</sub>H<sub>36</sub>O<sub>3</sub>Na

715.5910  
C<sub>47</sub>H<sub>80</sub>O<sub>3</sub>Na

Relative Abundance

100  
80  
60  
40  
20  
0

280 290 300 310 320 330 340 350 360 370

m/z

285.9895

329.2445  
C<sub>20</sub>H<sub>34</sub>O<sub>2</sub>Na

347.2555  
C<sub>20</sub>H<sub>36</sub>O<sub>3</sub>Na

715.5910  
C<sub>47</sub>H<sub>80</sub>O<sub>3</sub>Na

Relative Abundance

100  
80  
60  
40  
20  
0

280 290 300 310 320 330 340 350 360 370

m/z

285.9895

329.2445  
C<sub>20</sub>H<sub>34</sub>O<sub>2</sub>Na

347.2555  
C<sub>20</sub>H<sub>36</sub>O<sub>3</sub>Na

715.5910  
C<sub>47</sub>H<sub>80</sub>O<sub>3</sub>Na



# CE(20:1<ep>) RT 24.8

[oxCE+Na]<sup>+</sup>

XIC 715.6005 NL: 4.37E4

- Fragments containing oxFAs
- Fragments related to water loss
- Fragments not containing oxFAs
- Position-specific fragments
- Fragments related to other oxLPPs

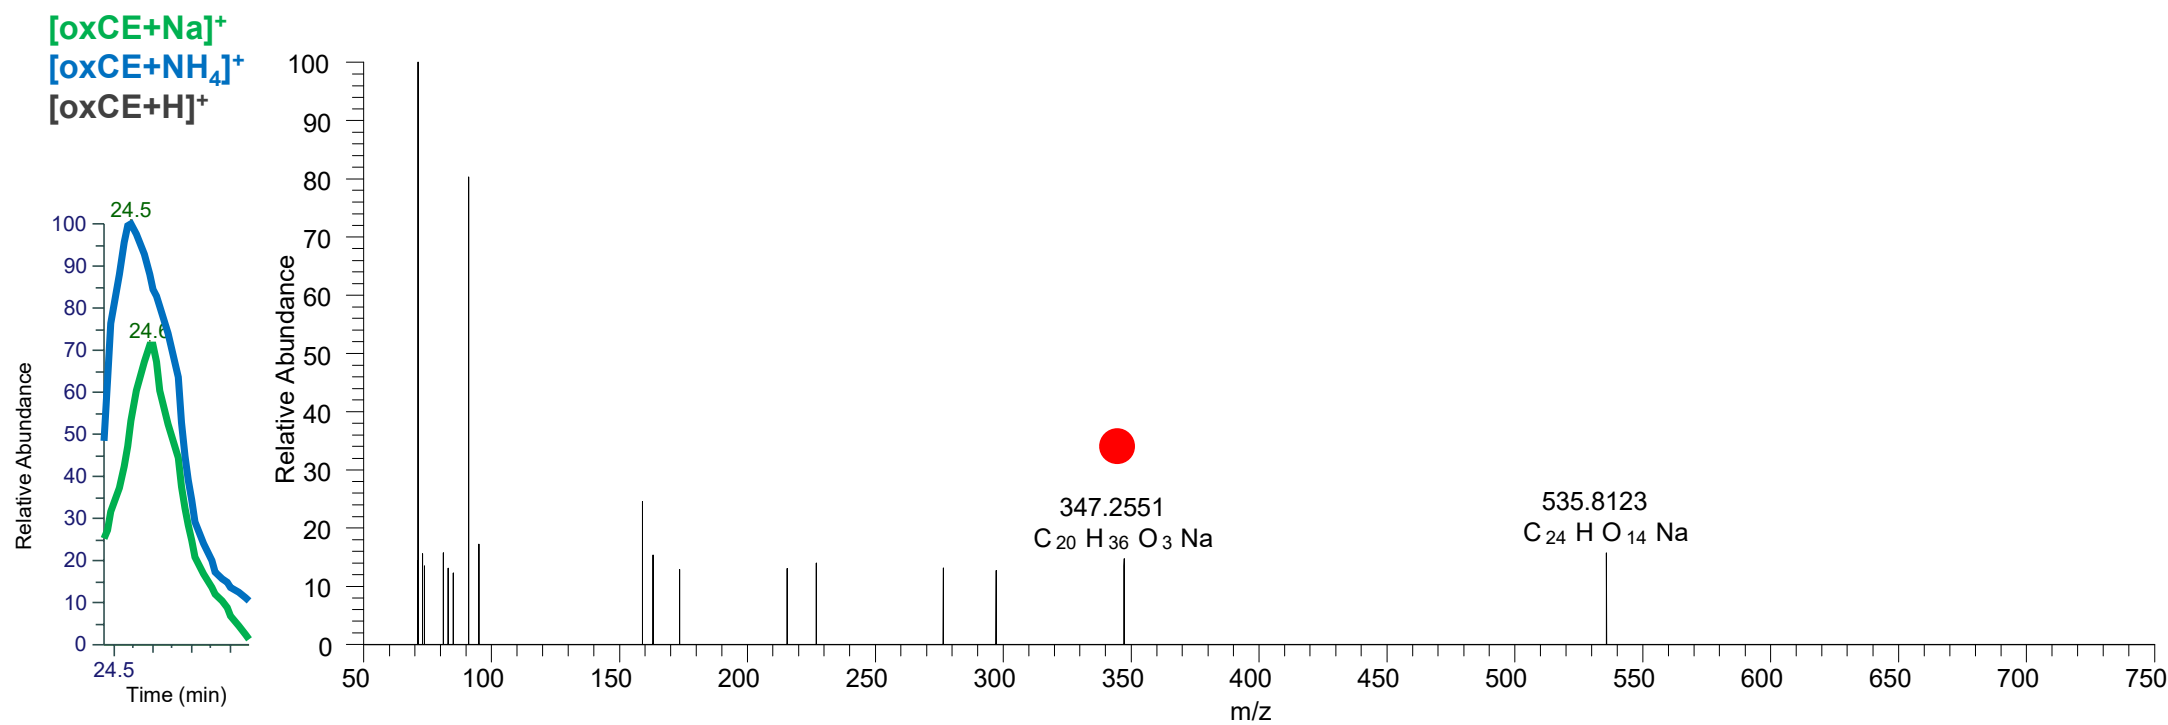

# CE(18:3<OH,OOH{13}>) RT 20.3

[oxCE+Na]<sup>+</sup>

XIC 717.5434 NL: 1.19E5

- Fragments containing oxFAs
- Fragments related to water loss
- Fragments not containing oxFAs
- Position-specific fragments
- Fragments related to other oxLPPs

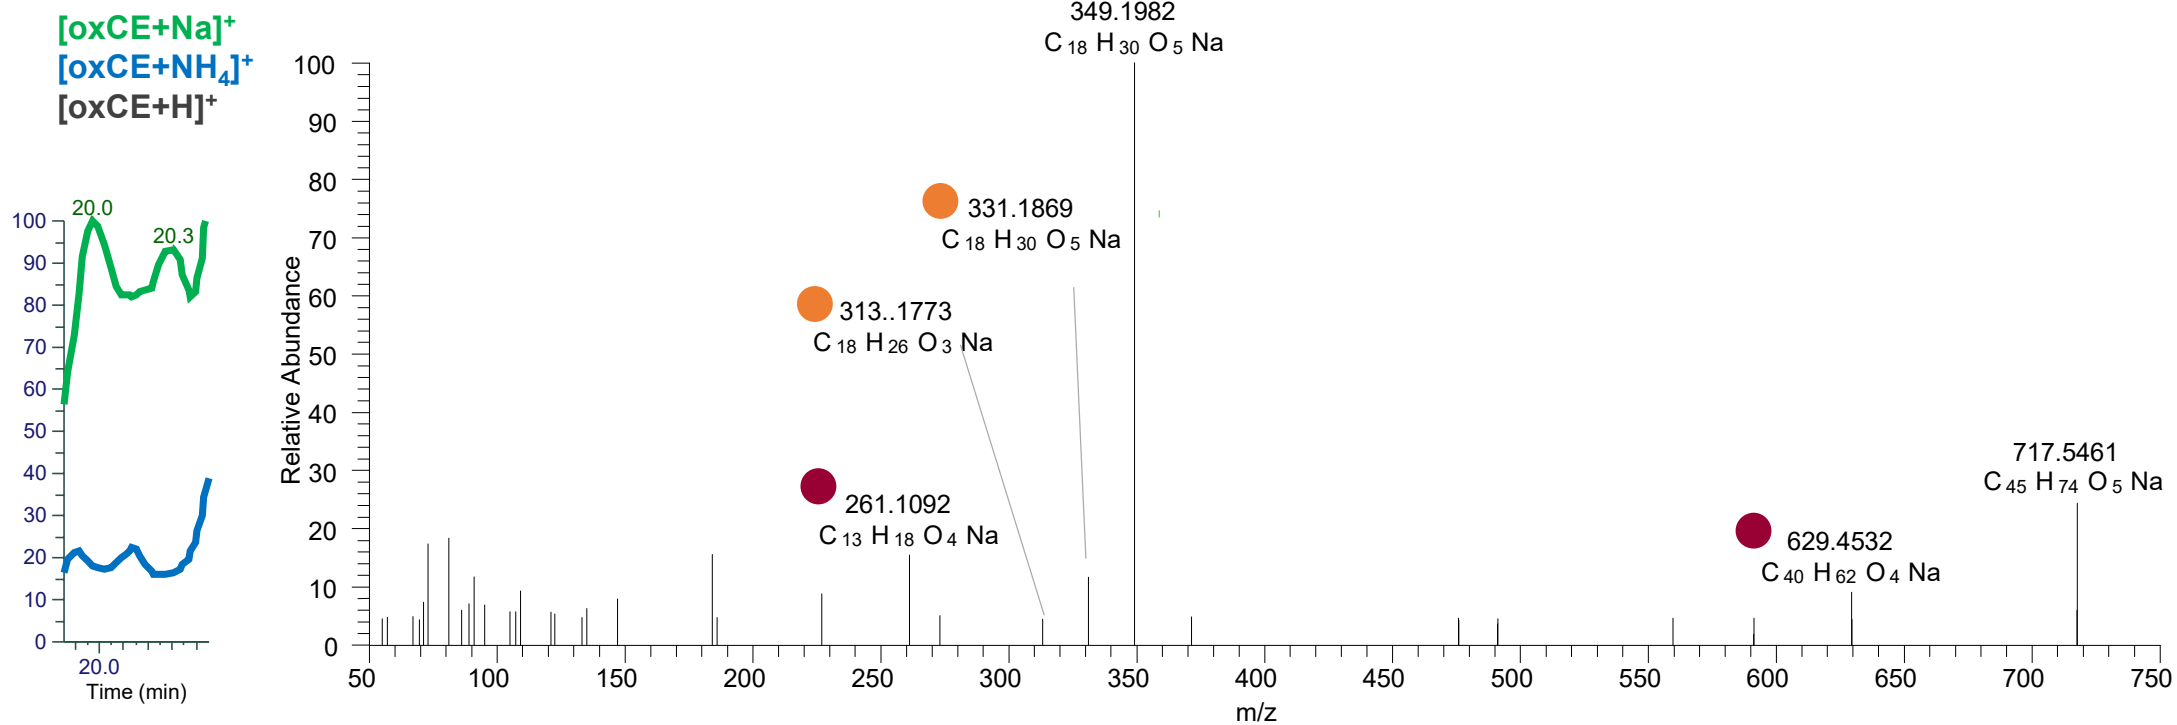

# CE(18:2<3O>) RT 20.8

[oxCE+Na]<sup>+</sup>

XIC 719.5590 NL: 1.45E5

- Fragments containing oxFAs
- Fragments related to water loss
- Fragments not containing oxFAs
- Position-specific fragments
- Fragments related to other oxLPPs

[oxCE+Na]<sup>+</sup>  
[oxCE+NH<sub>4</sub>]<sup>+</sup>  
[oxCE+H]<sup>+</sup>

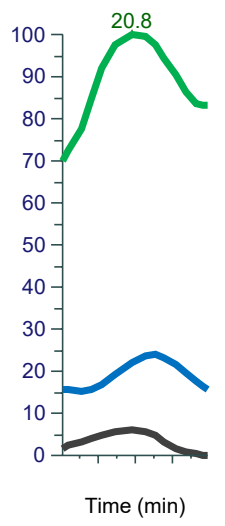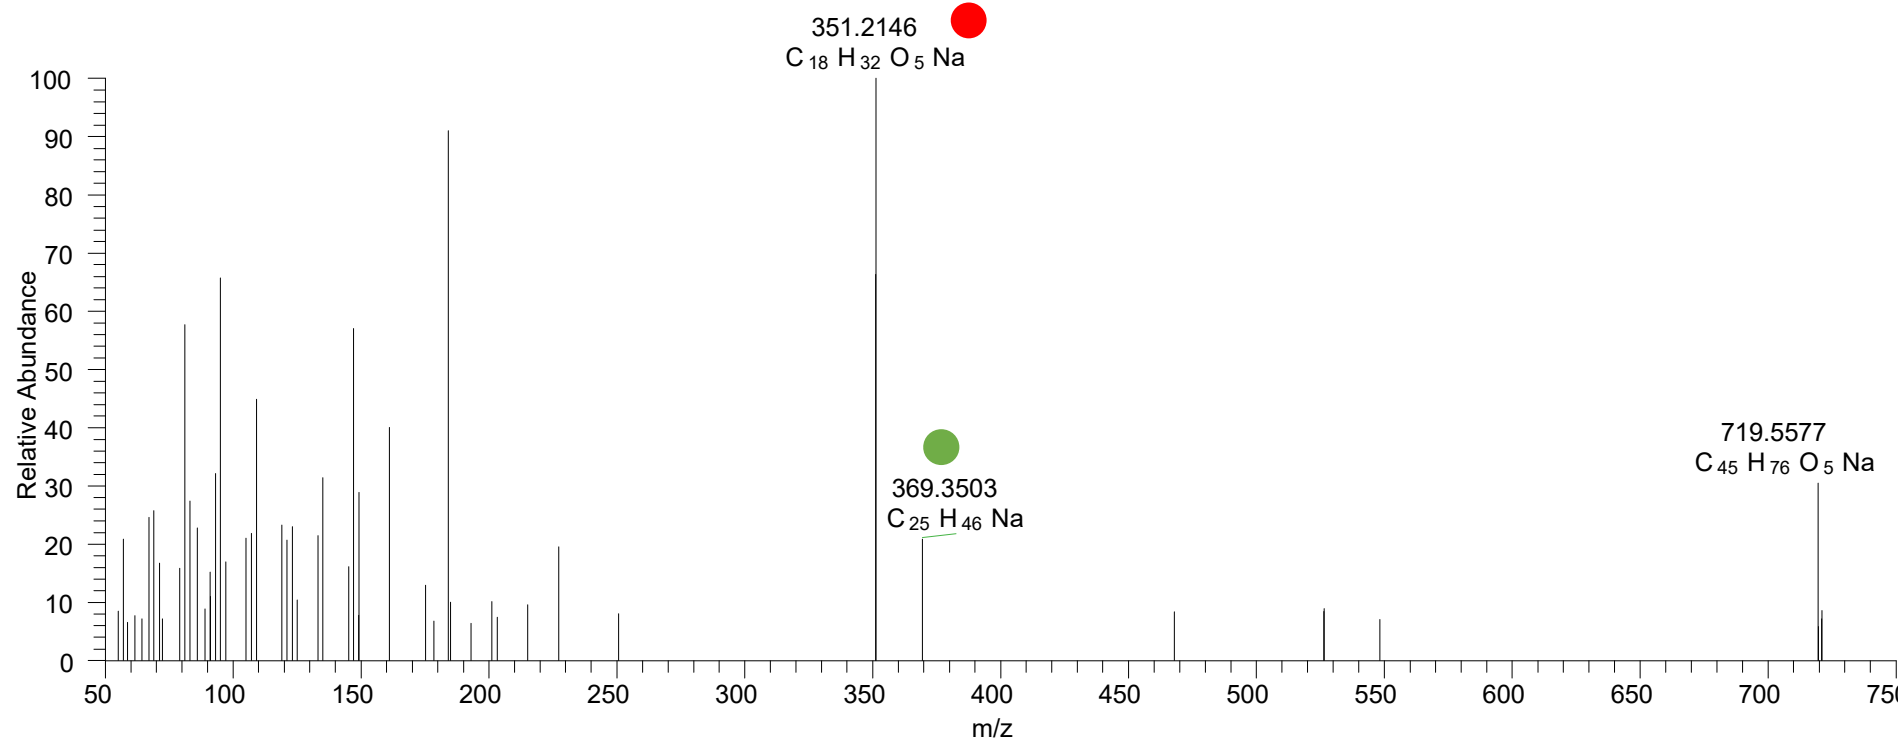

# CE(18:2<O,OOH{13}>) RT 22.0

[oxCE+Na]<sup>+</sup>

XIC 719.5590 NL: 3.77E5

- Fragments containing oxFAs
- Fragments related to water loss
- Fragments not containing oxFAs
- Position-specific fragments
- Fragments related to other oxLPPs

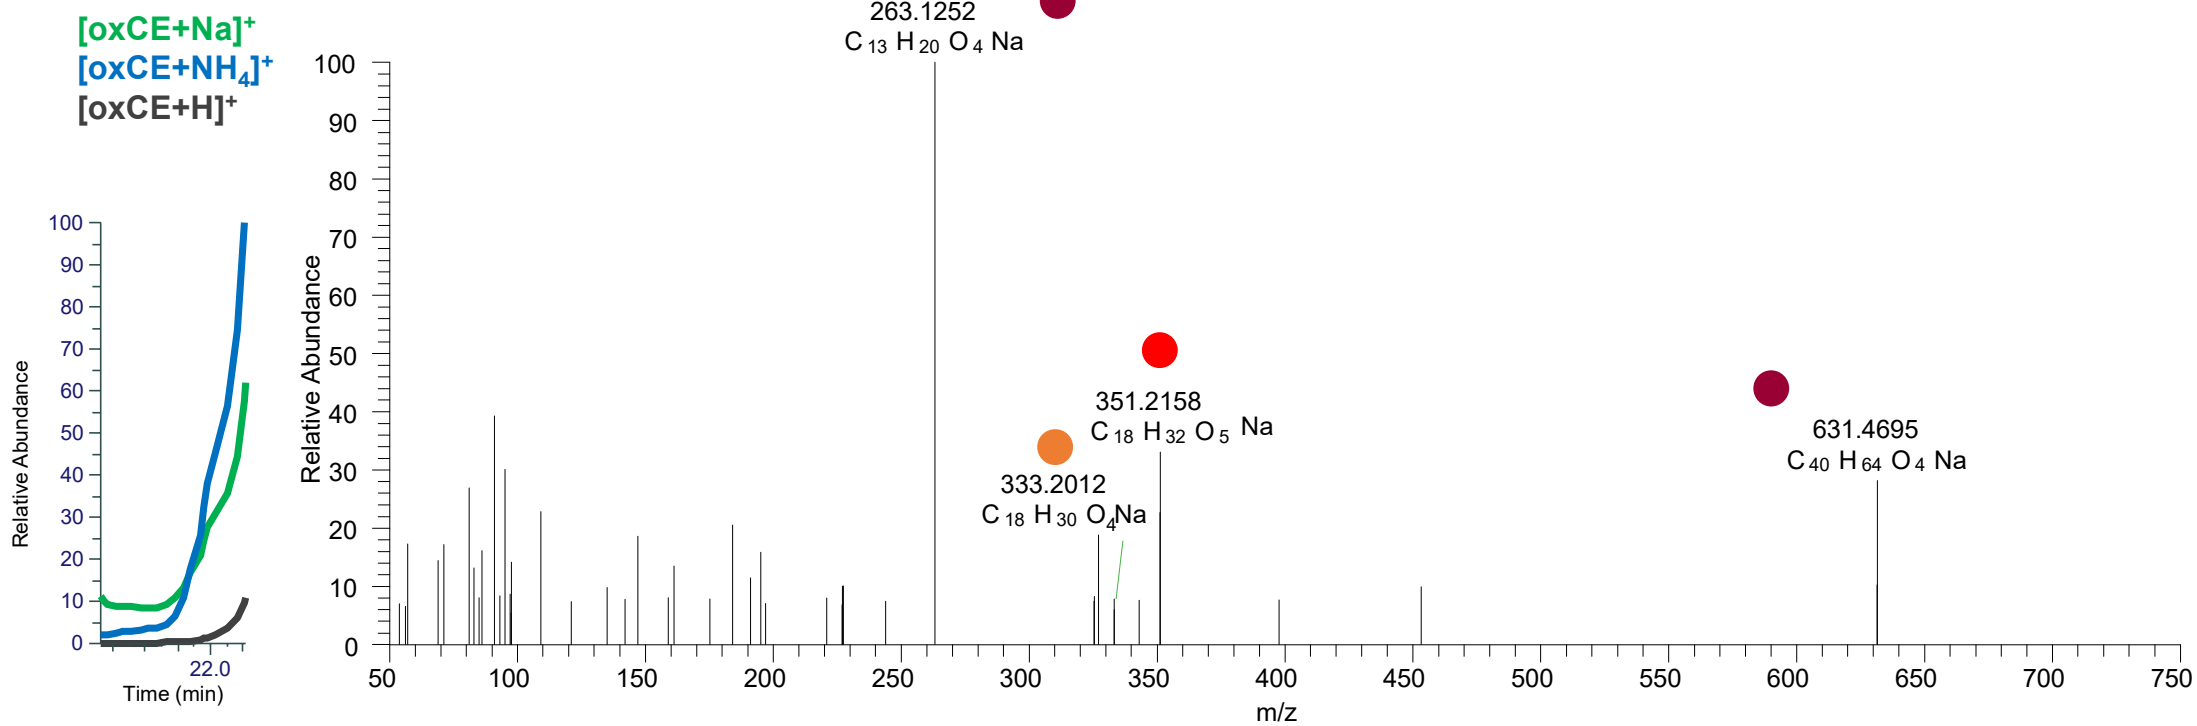

# CE(18:2<O{11},OOH{13}> CE(18:2<O{Chol},OOH{9}> RT 22.2

[oxCE+Na]<sup>+</sup>

XIC 719.5590 NL: 8.63E5

- Fragments containing oxFAs
- Fragments related to water loss
- Fragments not containing oxFAs
- Position-specific fragments
- Fragments related to other oxLPPs
- Fragments containing oxChol

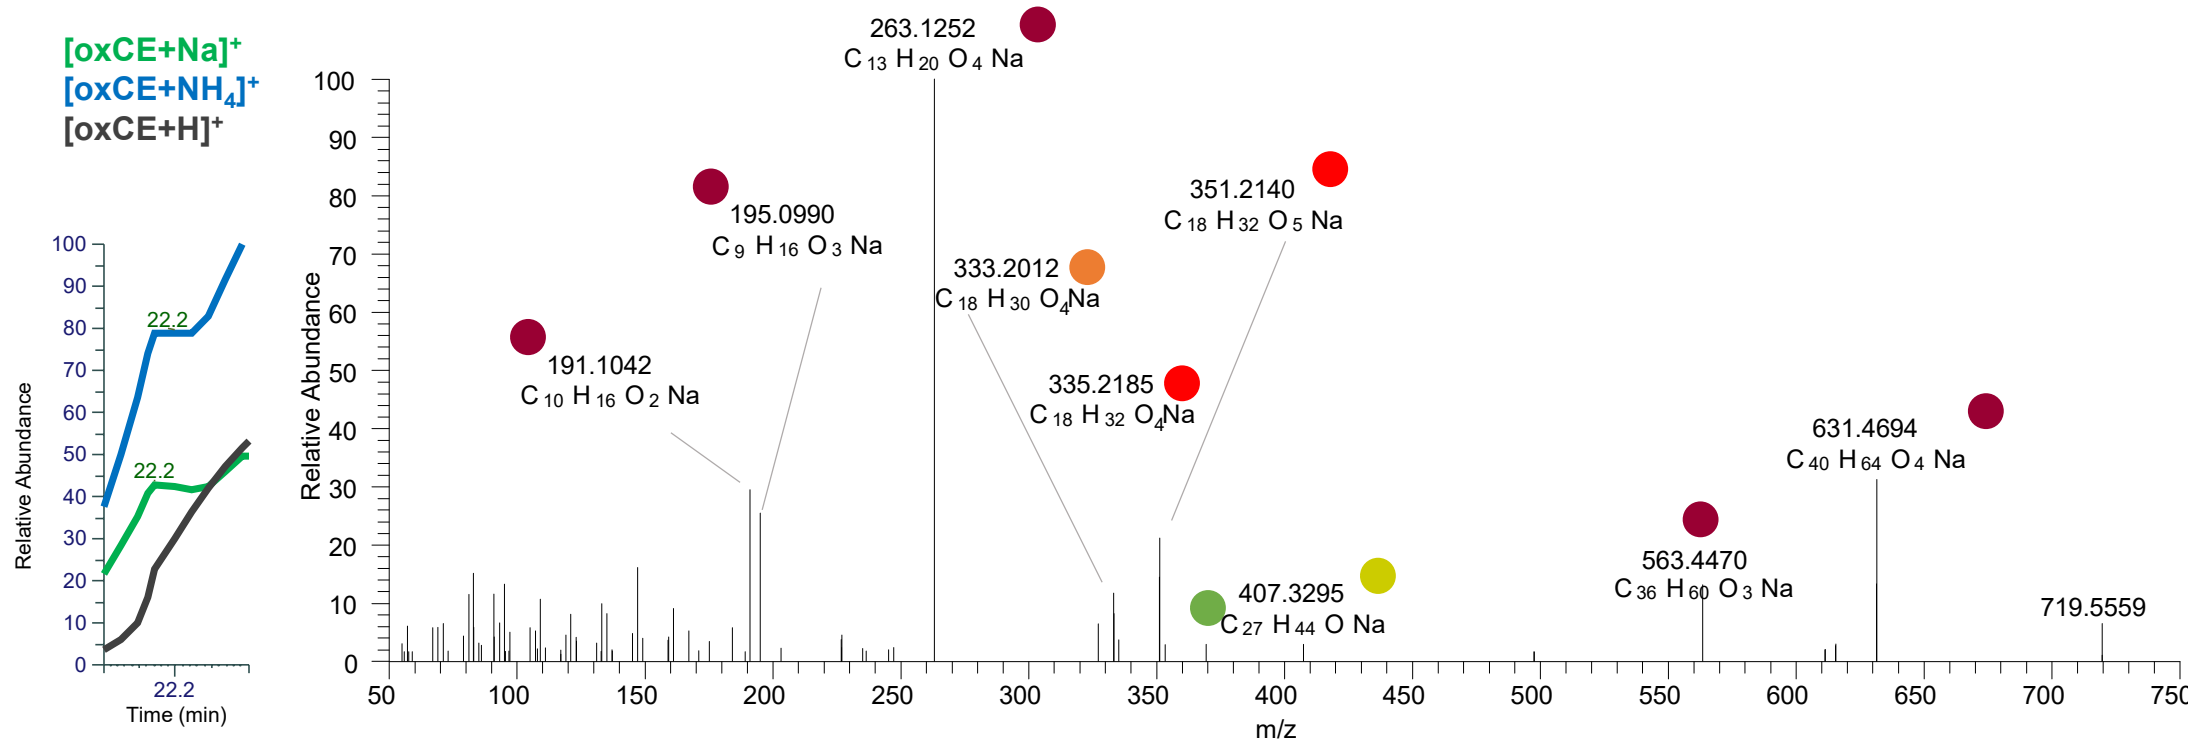

# CE(18:2<O{11},OOH{13}> RT 22.5

[oxCE+Na]<sup>+</sup>

XIC 719.5590 NL: 8.72E5

- Fragments containing oxFAs
- Fragments related to water loss
- Fragments not containing oxFAs
- Position-specific fragments
- Fragments related to other oxLPPs

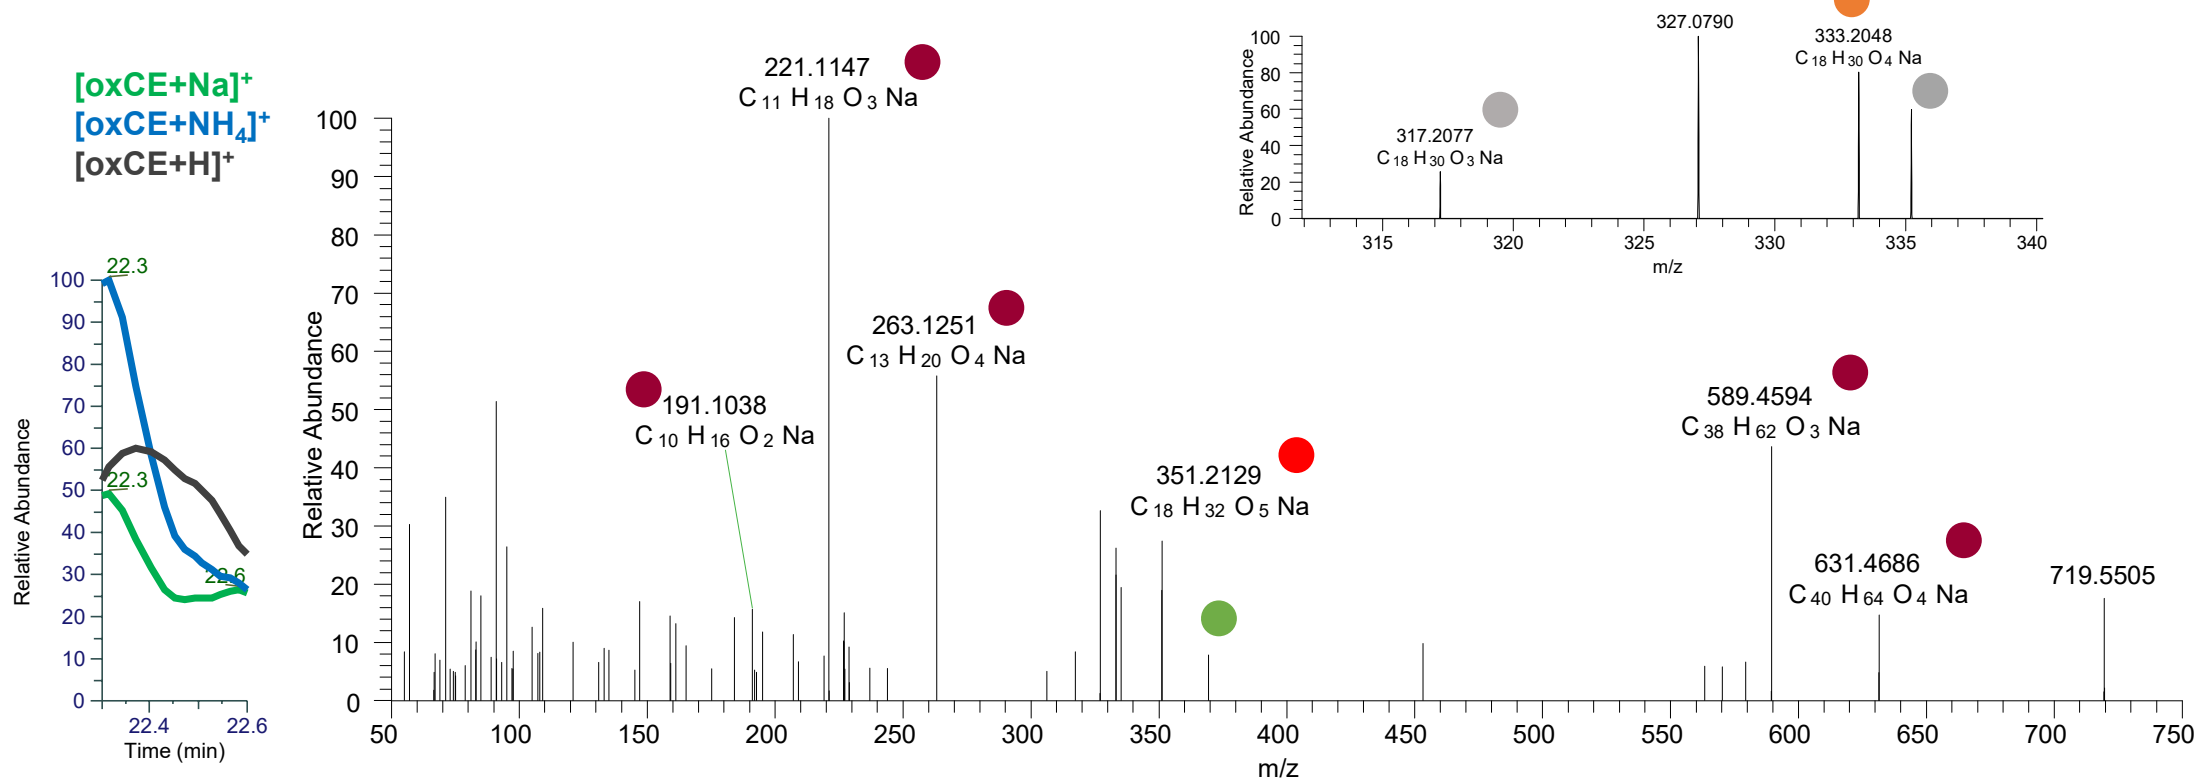

# CE(20:4<OH,ep>) RT 19.9

[oxCE+Na]<sup>+</sup>

XIC 723.5323 NL: 5.69E4

- Fragments containing oxFAs
- Fragments related to water loss
- Fragments not containing oxFAs
- Position-specific fragments
- Fragments related to other oxLPPs

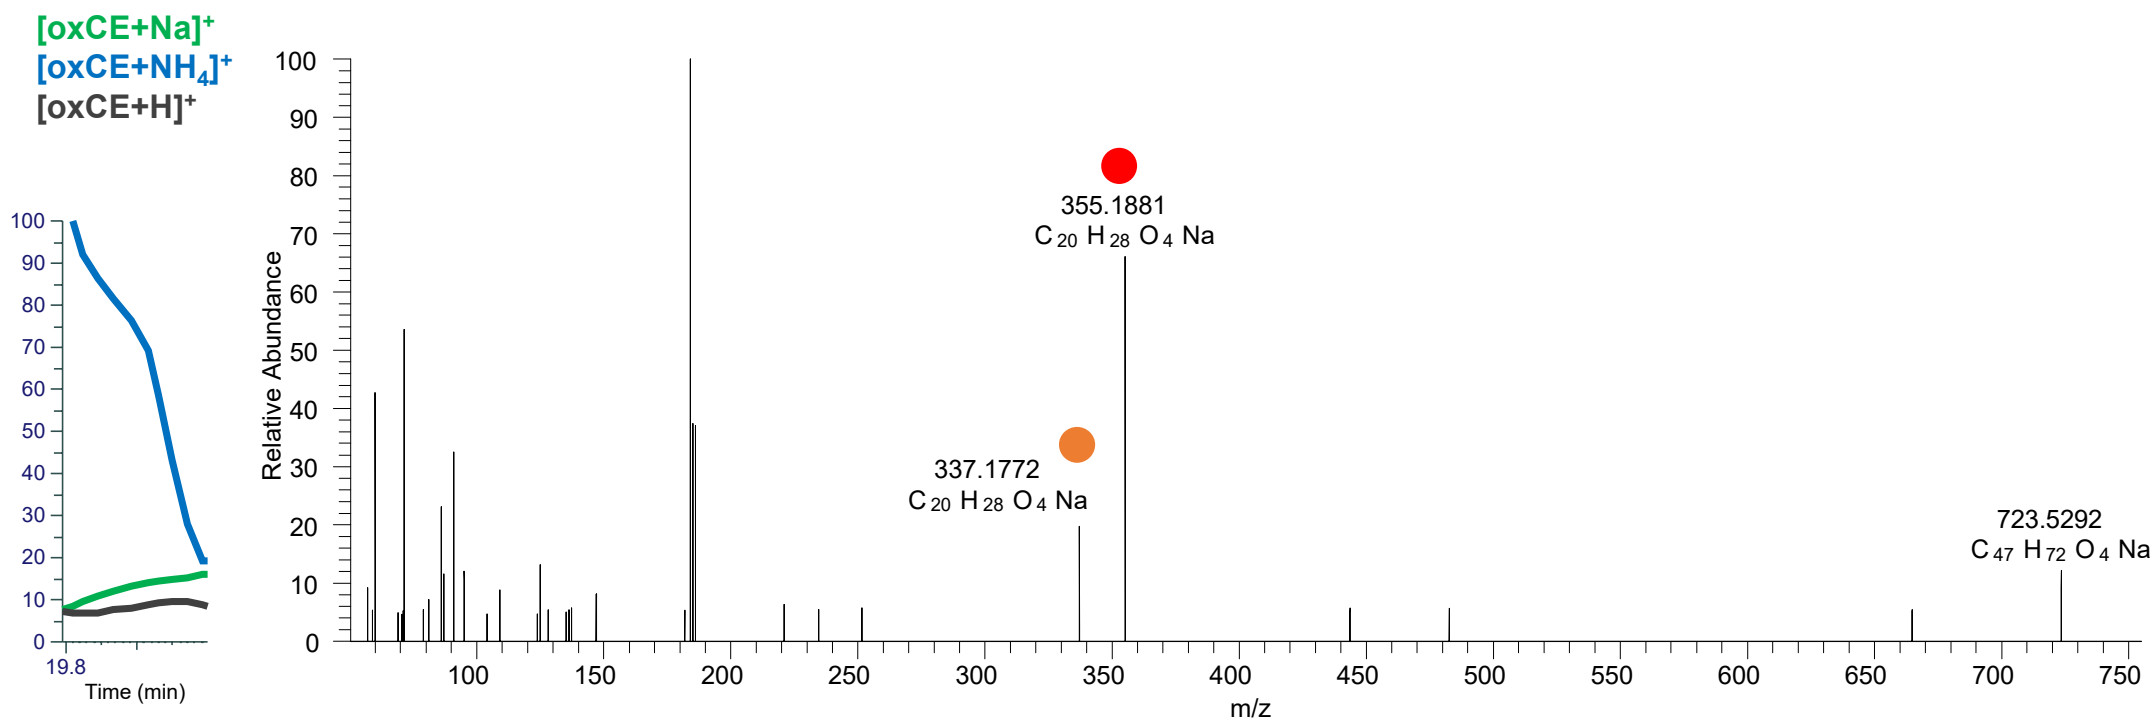

# CE(20:4<O,oxo>) RT 20.6

[oxCE+Na]<sup>+</sup>

XIC 723.5323 NL: 9.12E4

- Fragments containing oxFAs
- Fragments related to water loss
- Fragments not containing oxFAs
- Position-specific fragments
- Fragments related to other oxLPPs

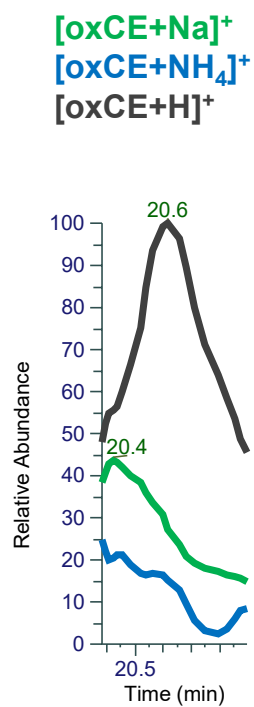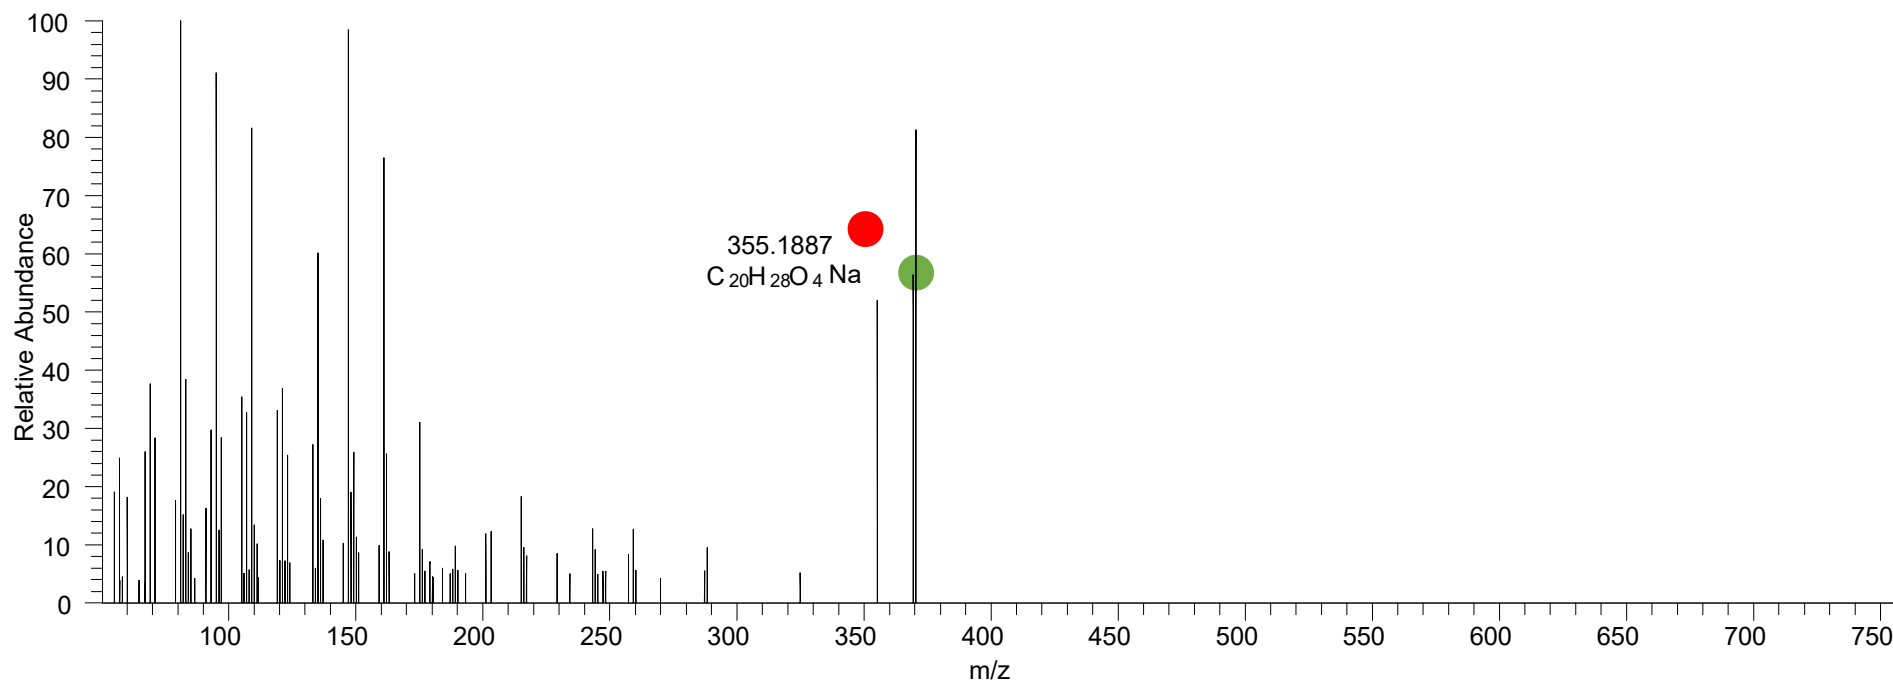



# CE(20:3<2oxo>) RT 22.0

[oxCE+Na]<sup>+</sup>

XIC 723.5323 NL: 1.07E5

- Fragments containing oxFAs
- Fragments related to water loss
- Fragments not containing oxFAs
- Position-specific fragments
- Fragments related to other oxLPPs

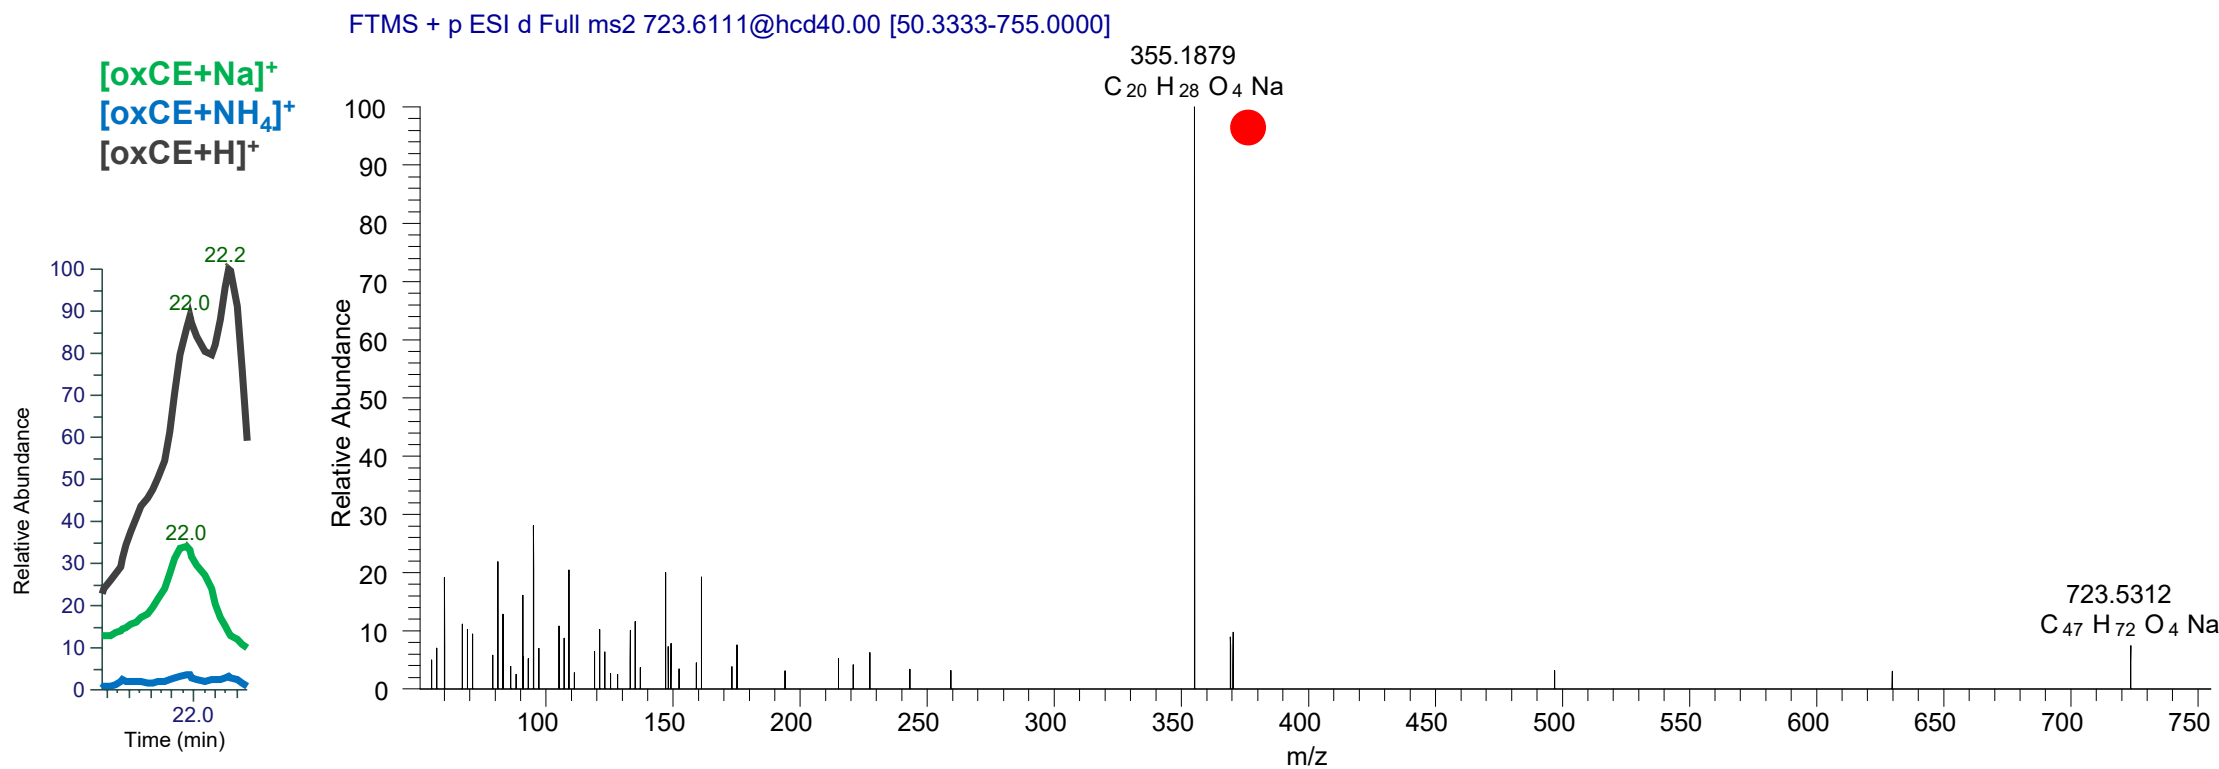

# CE(20:5<2OH>) RT 20.4

[oxCE+Na]<sup>+</sup>

XIC 725.5479 NL: 7.31E5

- Fragments containing oxFAs
- Fragments related to water loss
- Fragments not containing oxFAs
- Position-specific fragments
- Fragments related to other oxLPPs

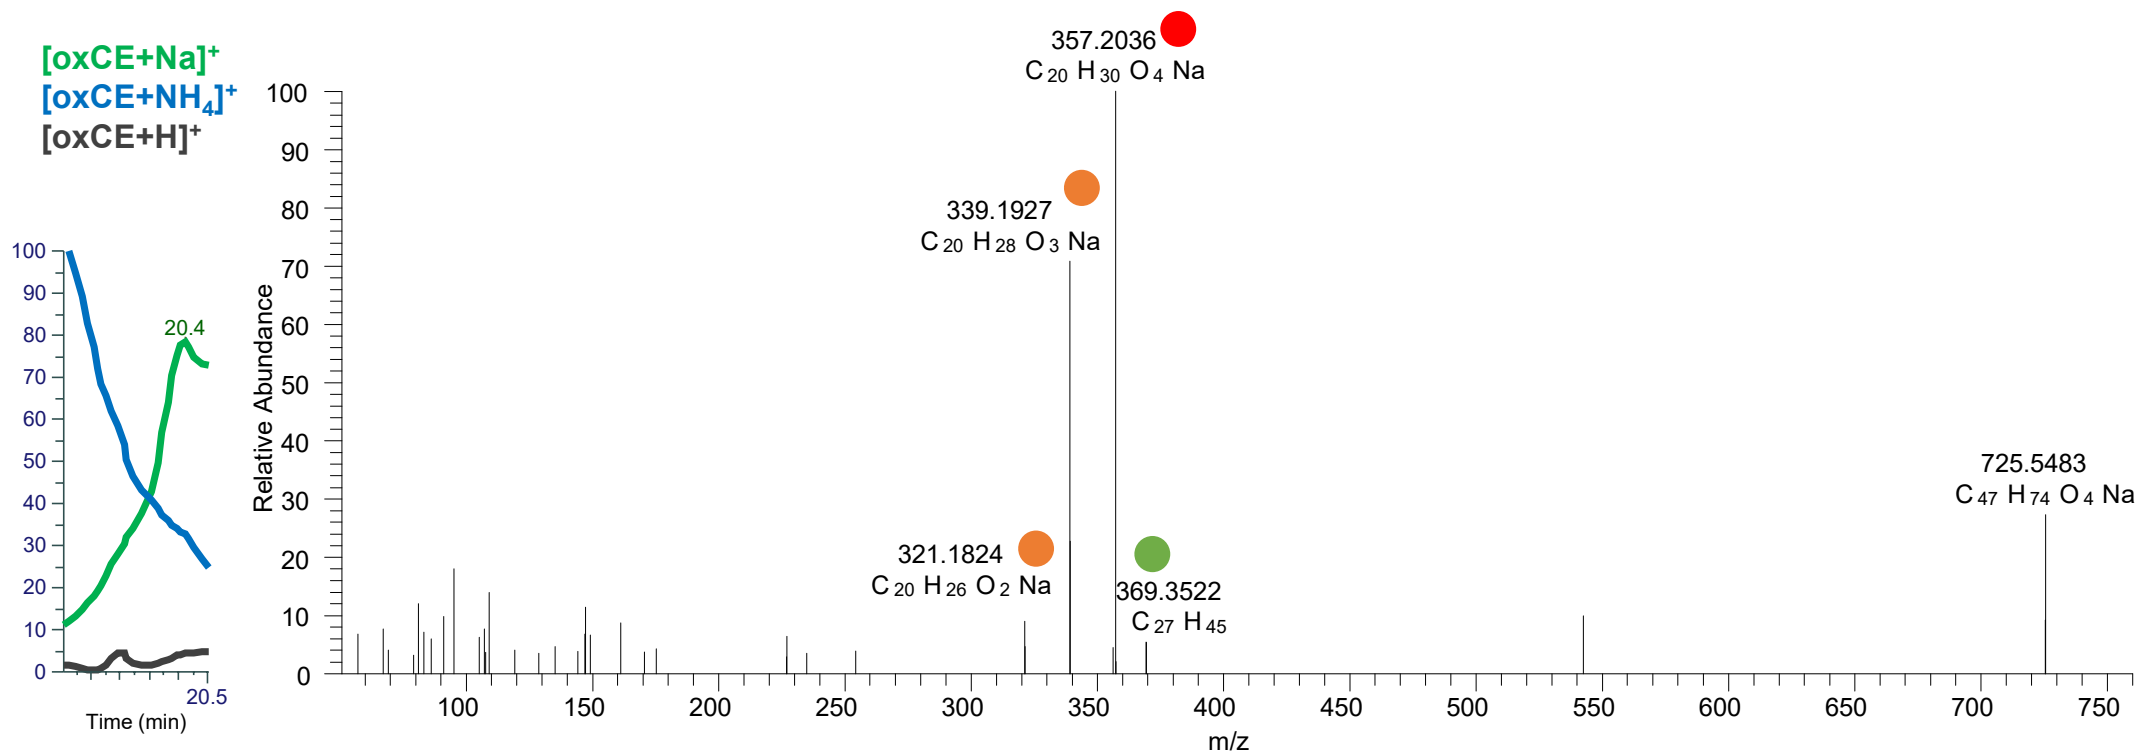

# CE(20:5<OH{9},OH>) RT 20.6

[oxCE+Na]<sup>+</sup>

XIC 725.5479 NL: 7.57E5

- Fragments containing oxFAs
- Fragments related to water loss
- Fragments not containing oxFAs
- Position-specific fragments
- Fragments related to other oxLPPs

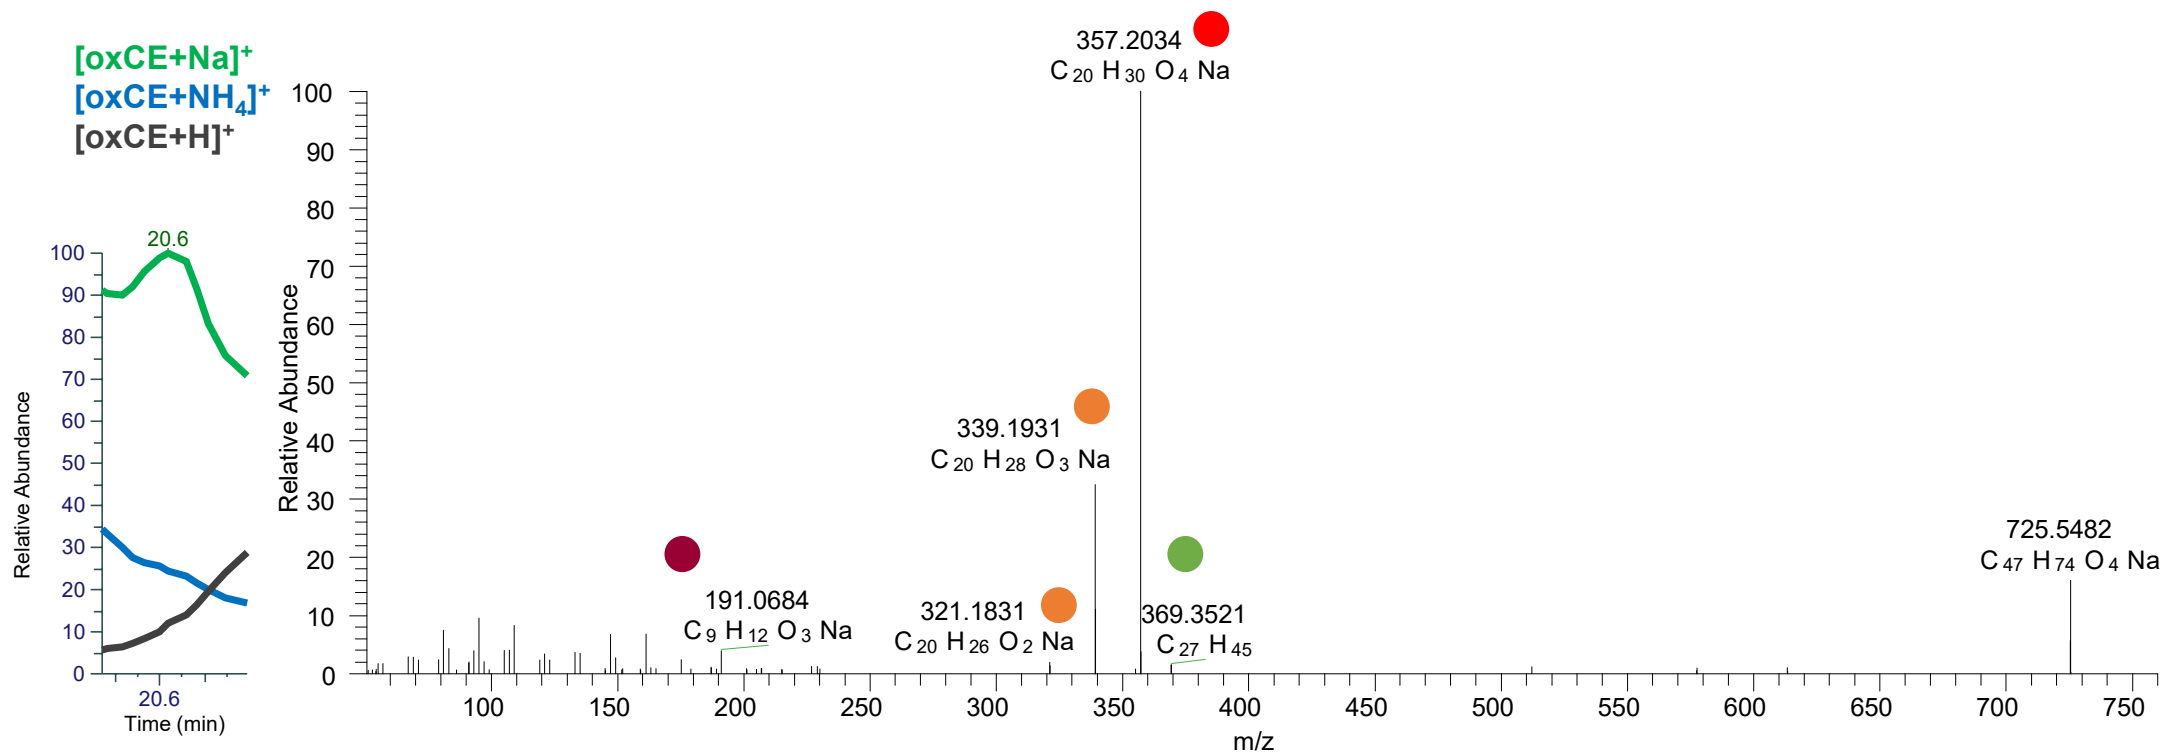

# CE(20:5<OOH{9}>) CE(20:5<OOH{12}>) RT 22.9

[oxCE+Na]<sup>+</sup>

XIC 725.5479 NL: 5.07E5

- Fragments containing oxFAs
- Fragments related to water loss
- Fragments not containing oxFAs
- Position-specific fragments
- Fragments related to other oxLPPs

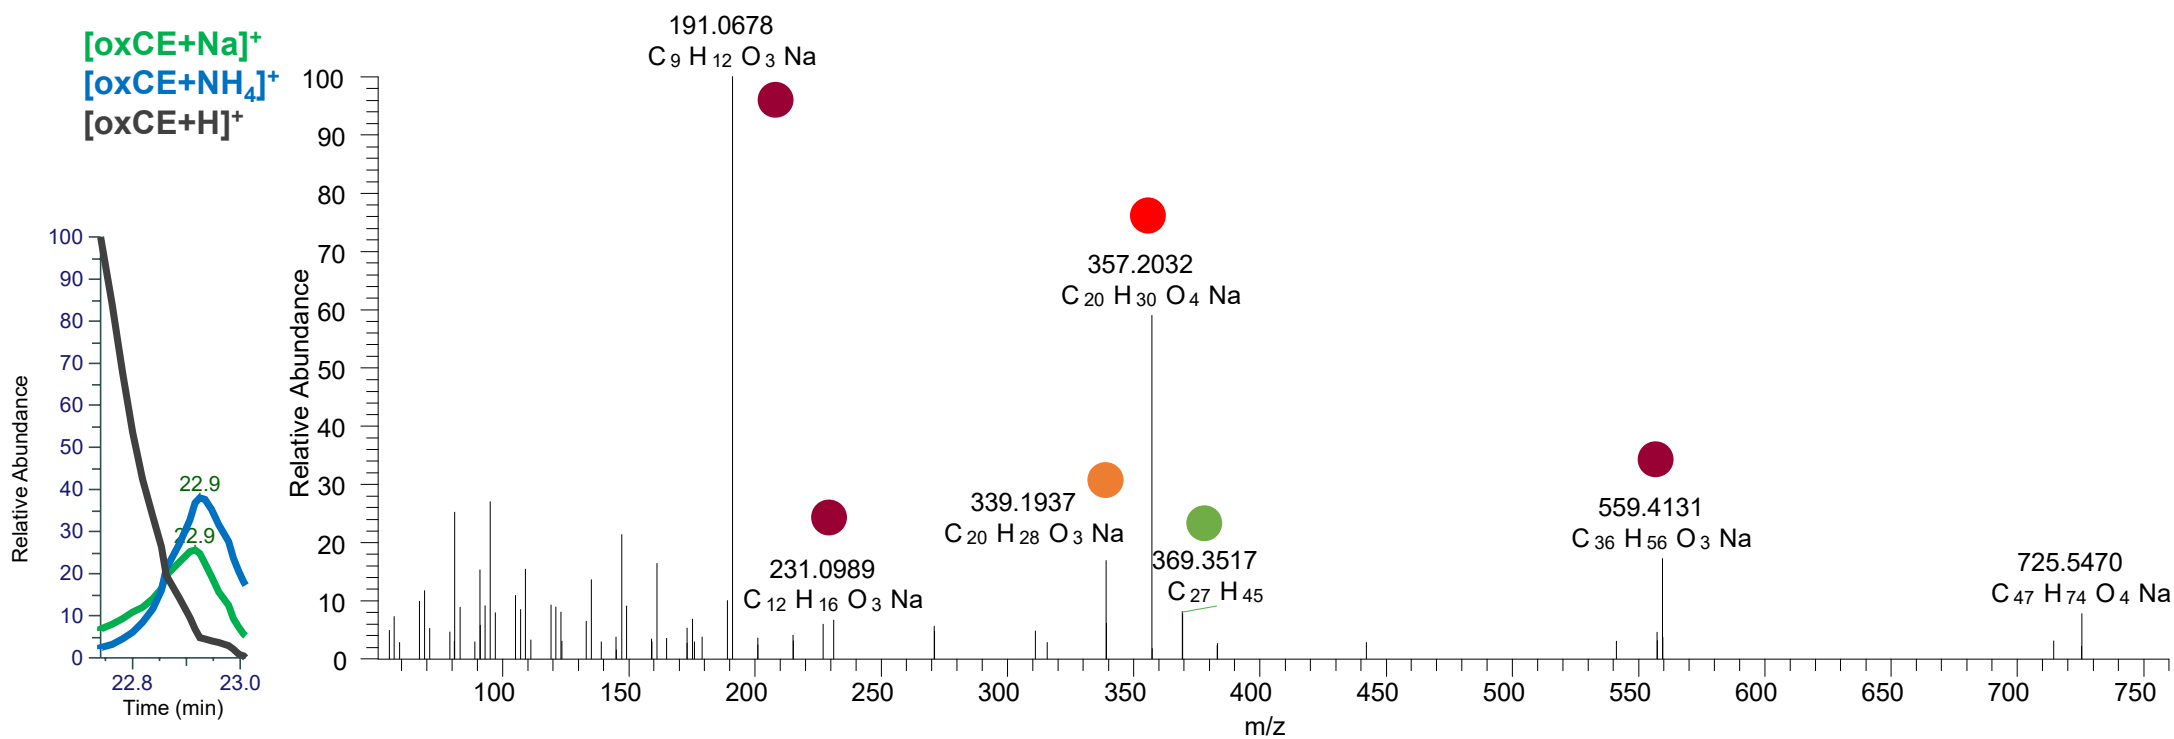

# CE(20:4<2OH>) RT 20.4

[oxCE+Na]<sup>+</sup>

XIC 727.5636 NL: 2.84E5

- Fragments containing oxFAs
- Fragments related to water loss
- Fragments not containing oxFAs
- Position-specific fragments
- Fragments related to other oxLPPs

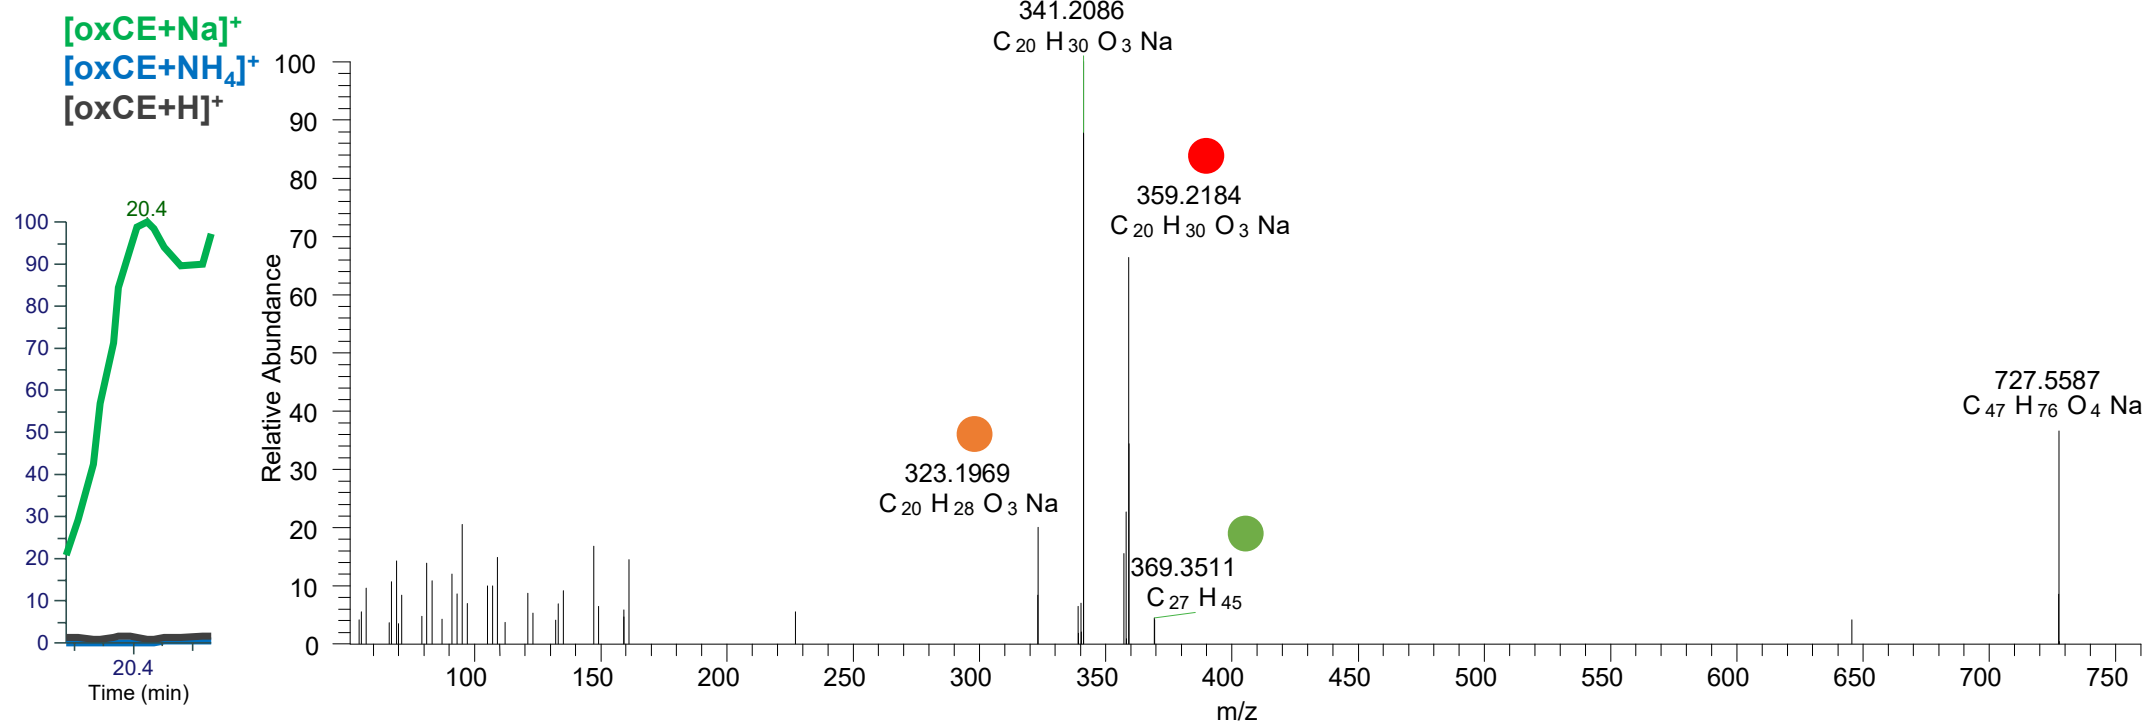

# CE(20:4<OH{9},OH>) RT 21.1

[oxCE+Na]<sup>+</sup>

XIC 727.5636 NL: 3.36E6

- Fragments containing oxFAs
- Fragments related to water loss
- Fragments not containing oxFAs
- Position-specific fragments
- Fragments related to other oxLPPs

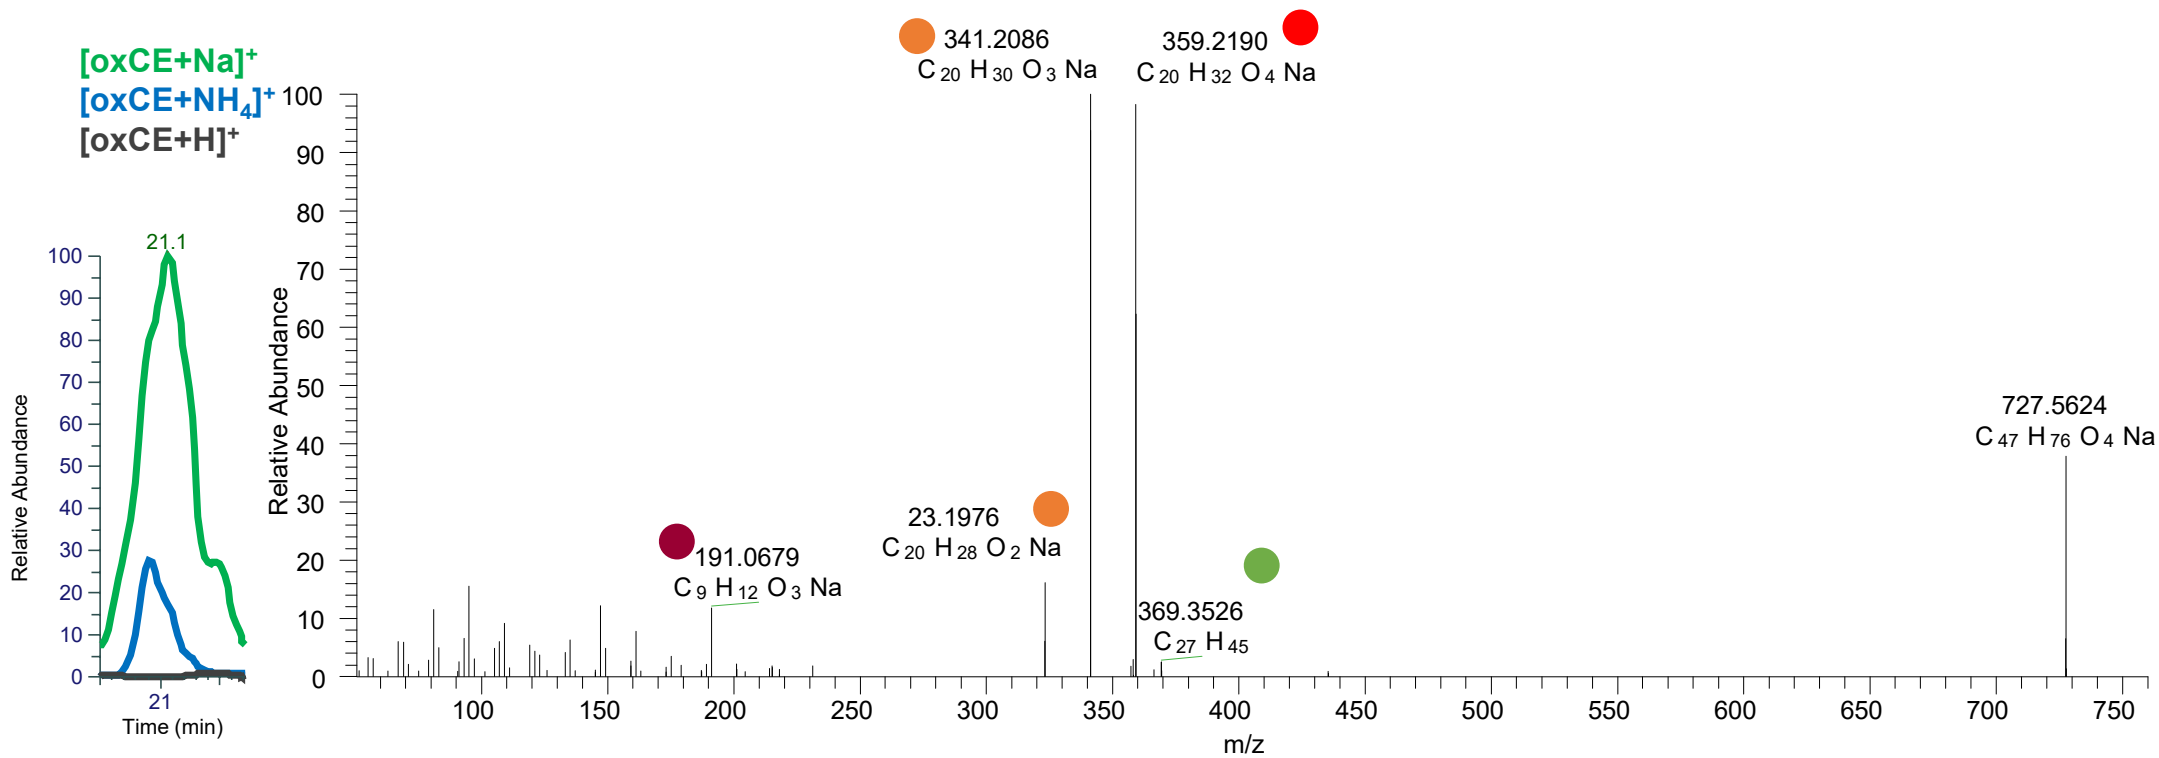

# CE(20:4<OH{9},OH>) RT 21.4

[oxCE+Na]<sup>+</sup>

XIC 727.5636 NL: 1.07E6

- Fragments containing oxFAs
- Fragments related to water loss
- Fragments not containing oxFAs
- Position-specific fragments
- Fragments related to other oxLPPs

QE\_20\_14\_MF4 #3146 RT: 21.46 AV: 1 NL:  
T: FTMS + p ESI d Full ms2 727.5634@hcd40.00 [50.6667-760.0000]

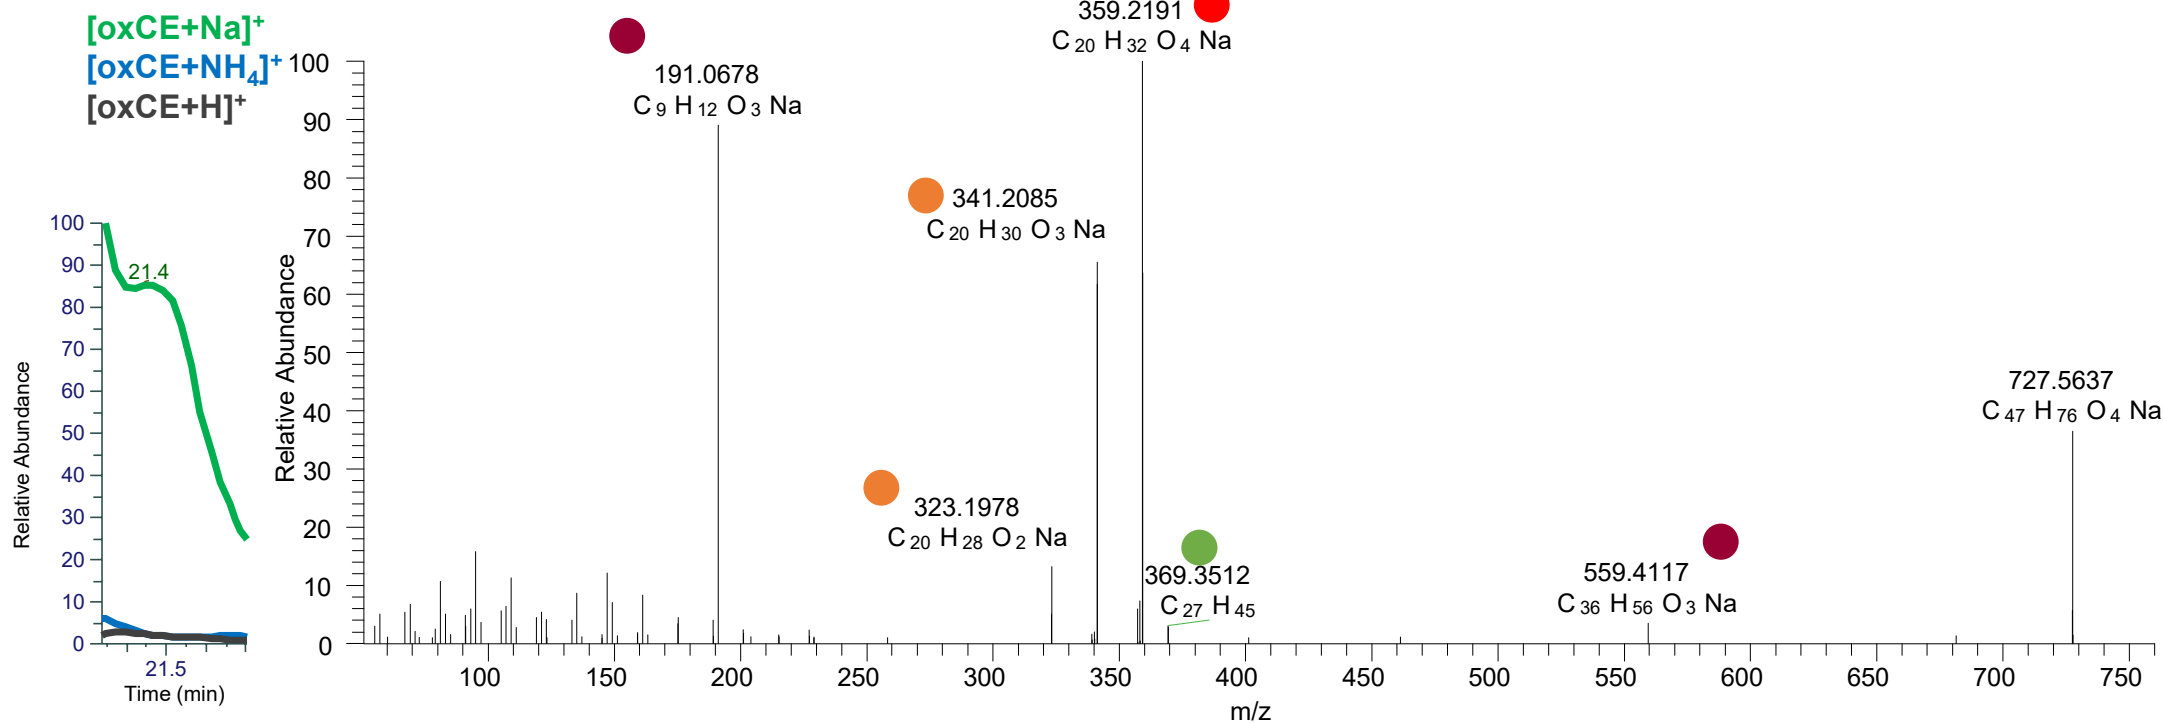

# CE(20:4<OH{9},OH>) RT 21.9

[oxCE+Na]<sup>+</sup>

XIC 727.5636 NL: 1.16E6

- Fragments containing oxFAs
- Fragments related to water loss
- Fragments not containing oxFAs
- Position-specific fragments
- Fragments related to other oxLPPs

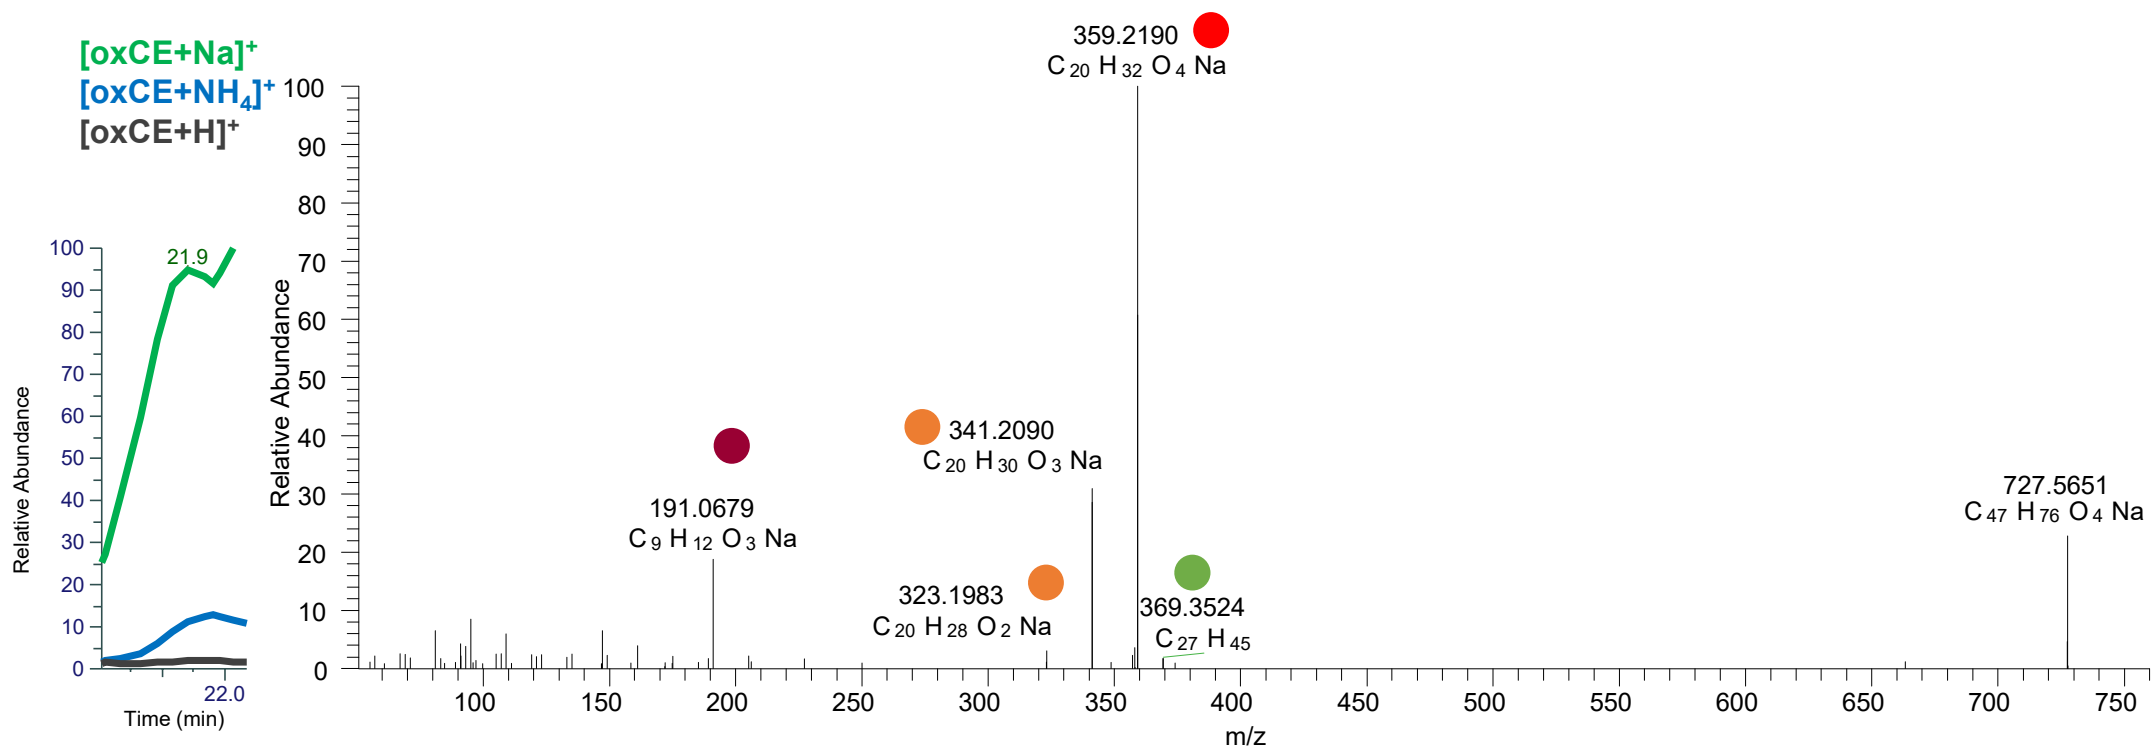



# CE(20:4<OH,O{10}>) RT 22.3

[oxCE+Na]<sup>+</sup>

XIC 727.5636 NL: 1.03E6

- Fragments containing oxFAs
- Fragments related to water loss
- Fragments not containing oxFAs
- Position-specific fragments
- Fragments related to other oxLPPs

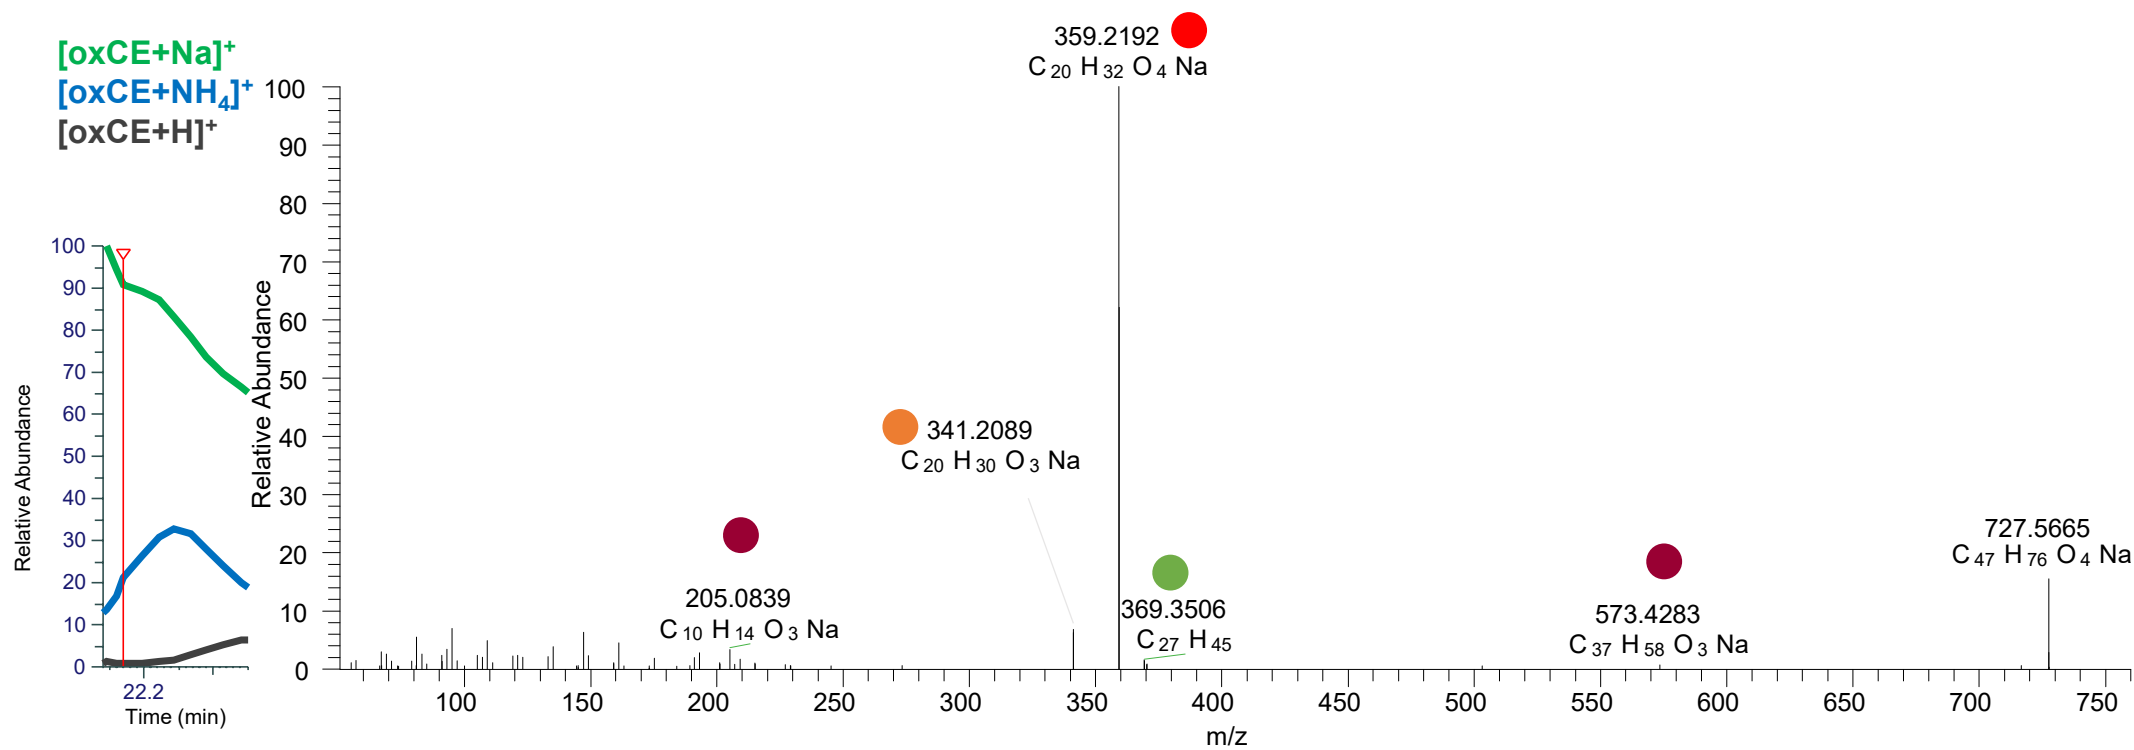

# CE(20:3<OH,O{9}>)

## RT 22.4

[oxCE+Na]<sup>+</sup>

XIC 727.5636 NL: 1.03E6

- Fragments containing oxFAs
- Fragments related to water loss
- Fragments not containing oxFAs
- Position-specific fragments
- Fragments related to other oxLPPs

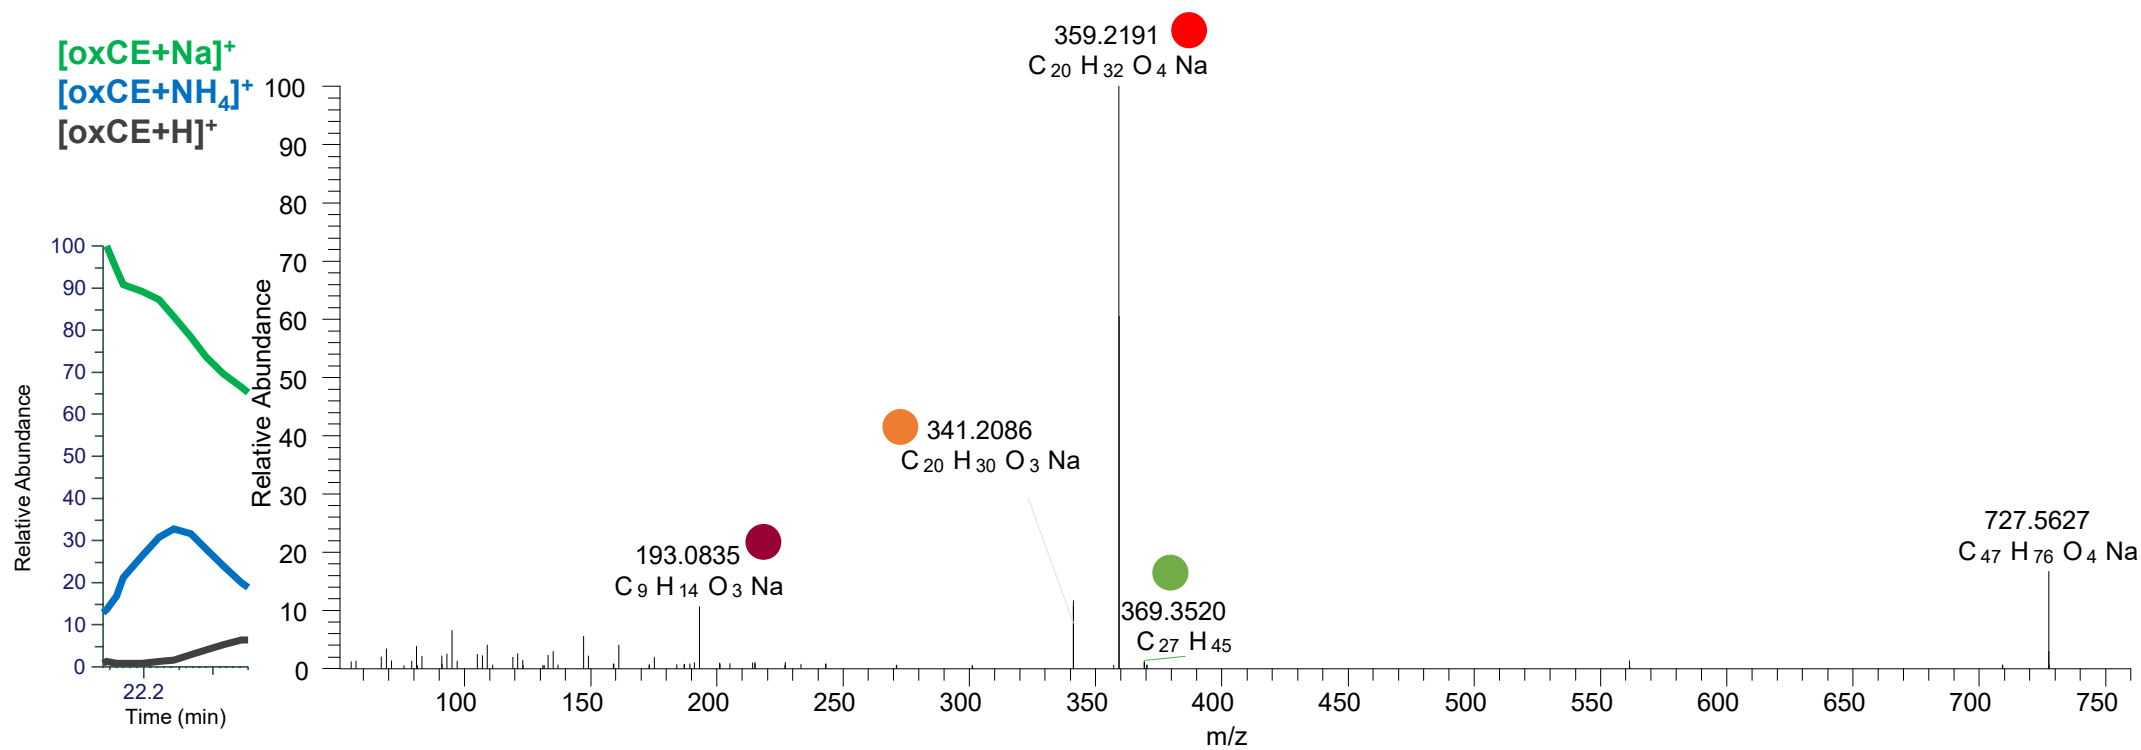

CE(20:4<OOH{15}>)  
CE(20:4<OOH{13}>)  
RT 23.2

[oxCE+Na]<sup>+</sup>

XIC 727.5636 NL: 3.78E5

- Fragments containing oxFAs
- Fragments related to water loss
- Fragments not containing oxFAs
- Position-specific fragments
- Fragments related to other oxLPPs

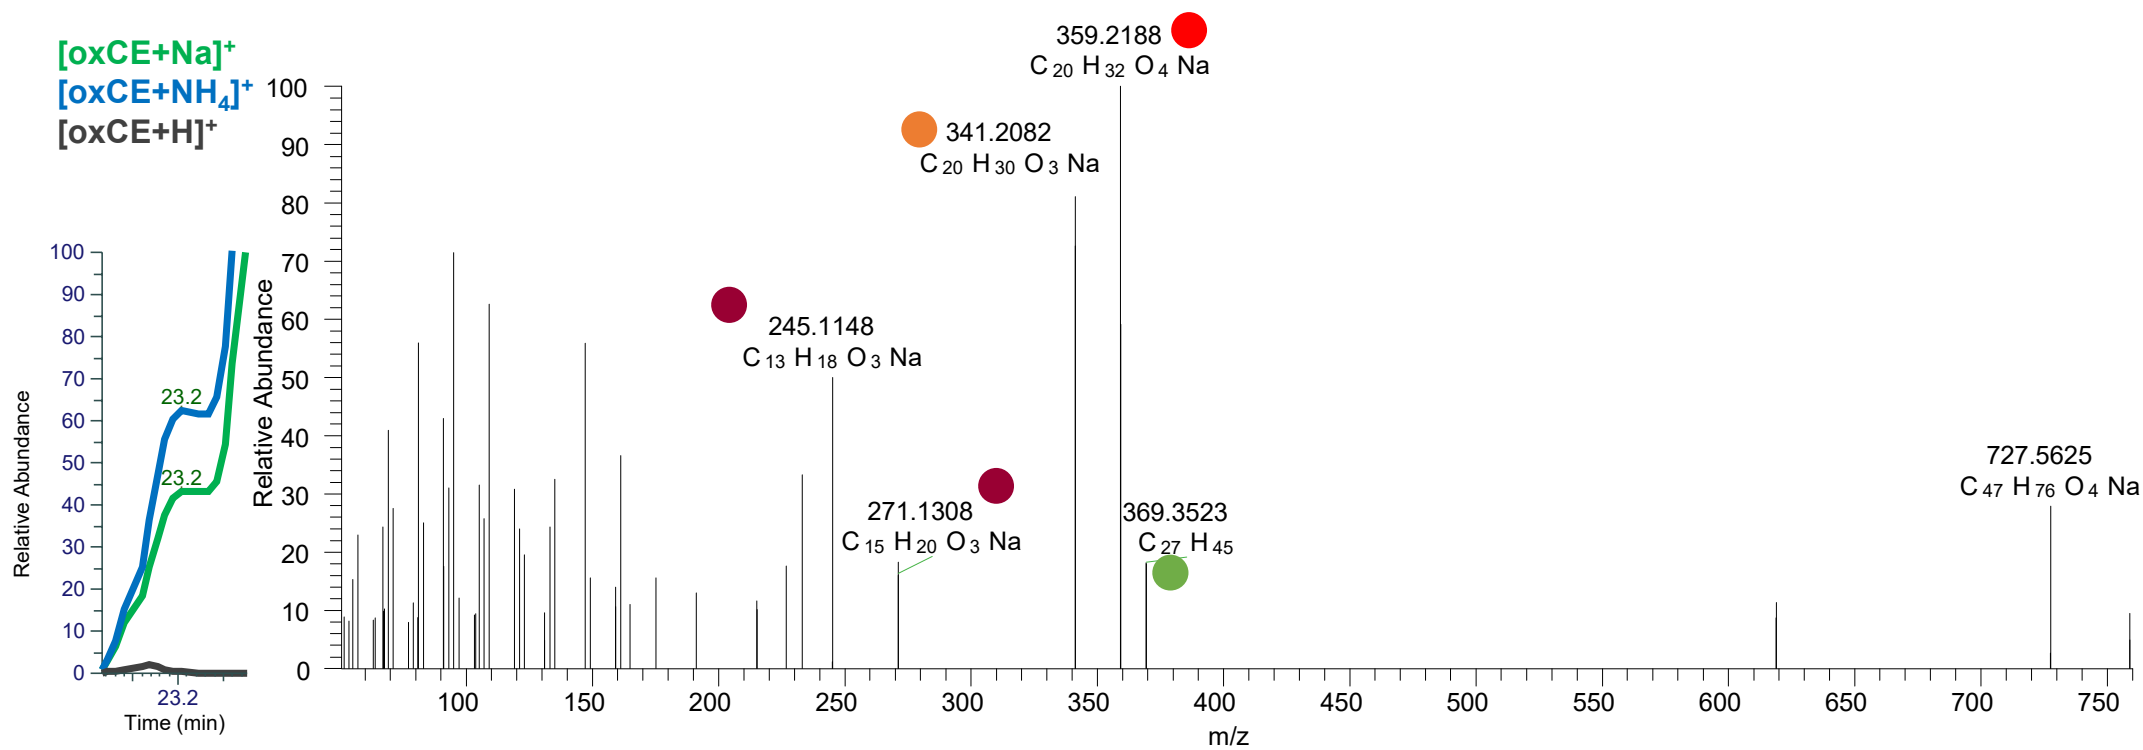

CE(20:4<OOH{15}>)  
CE(20:4<OOH{12}>)  
CE(20:4<OOH{9}>)  
RT 23.4

[oxCE+Na]<sup>+</sup>

XIC 727.5636 NL: 6.07E6

- Fragments containing oxFAs
- Fragments related to water loss
- Fragments not containing oxFAs
- Position-specific fragments
- Fragments related to other oxLPPs

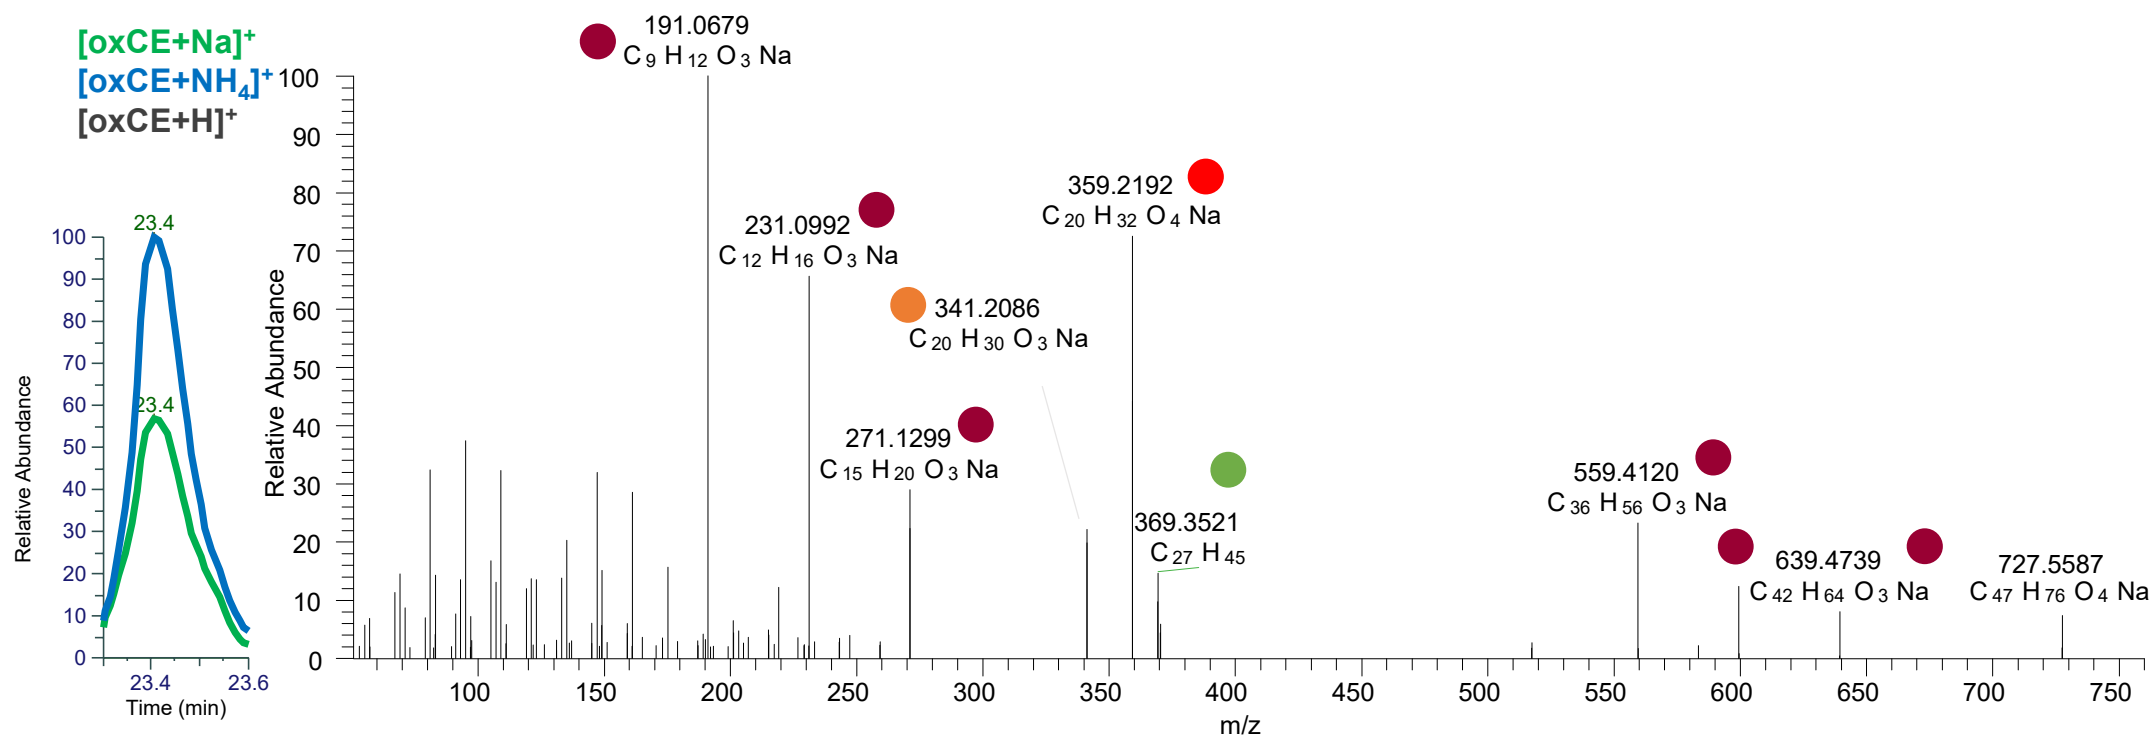

# CE(20:3<OH,O{9}>) RT 21.6

[oxCE+Na]<sup>+</sup>

XIC 729.5792 NL: 1.05E5

- Fragments containing oxFAs
- Fragments related to water loss
- Fragments not containing oxFAs
- Position-specific fragments
- Fragments related to other oxLPPs

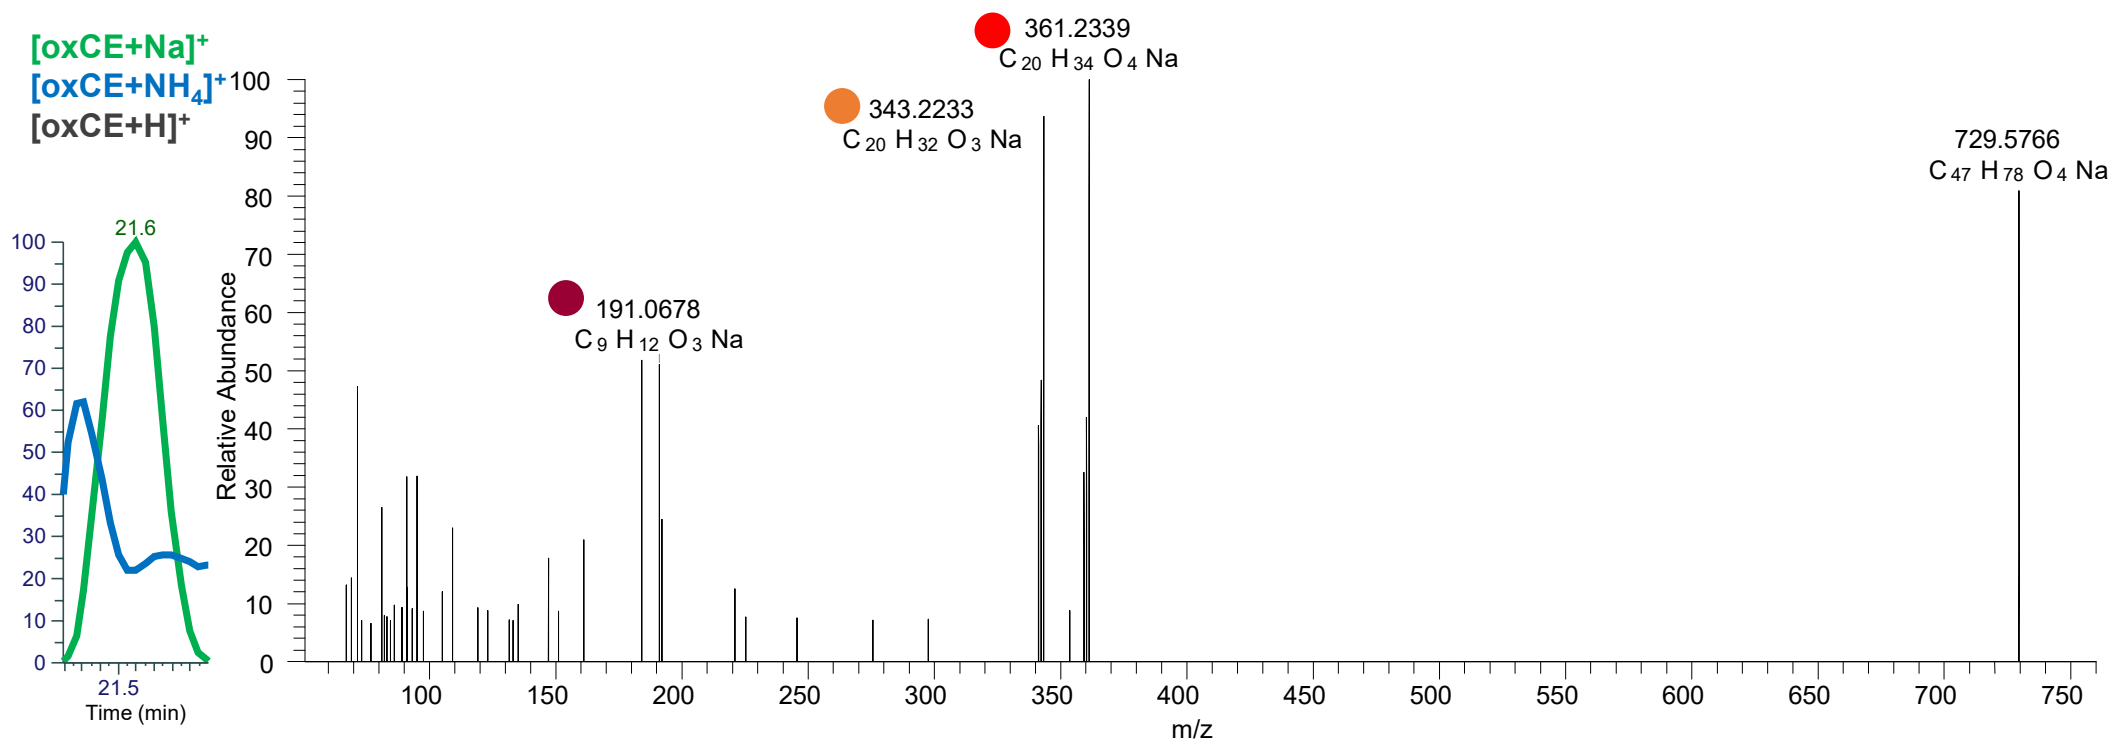

# CE(20:3<2OH>) RT 21.6

[oxCE+Na]<sup>+</sup>

XIC 729.5792 NL: 1.05E5

- Fragments containing oxFAs
- Fragments related to water loss
- Fragments not containing oxFAs
- Position-specific fragments
- Fragments related to other oxLPPs

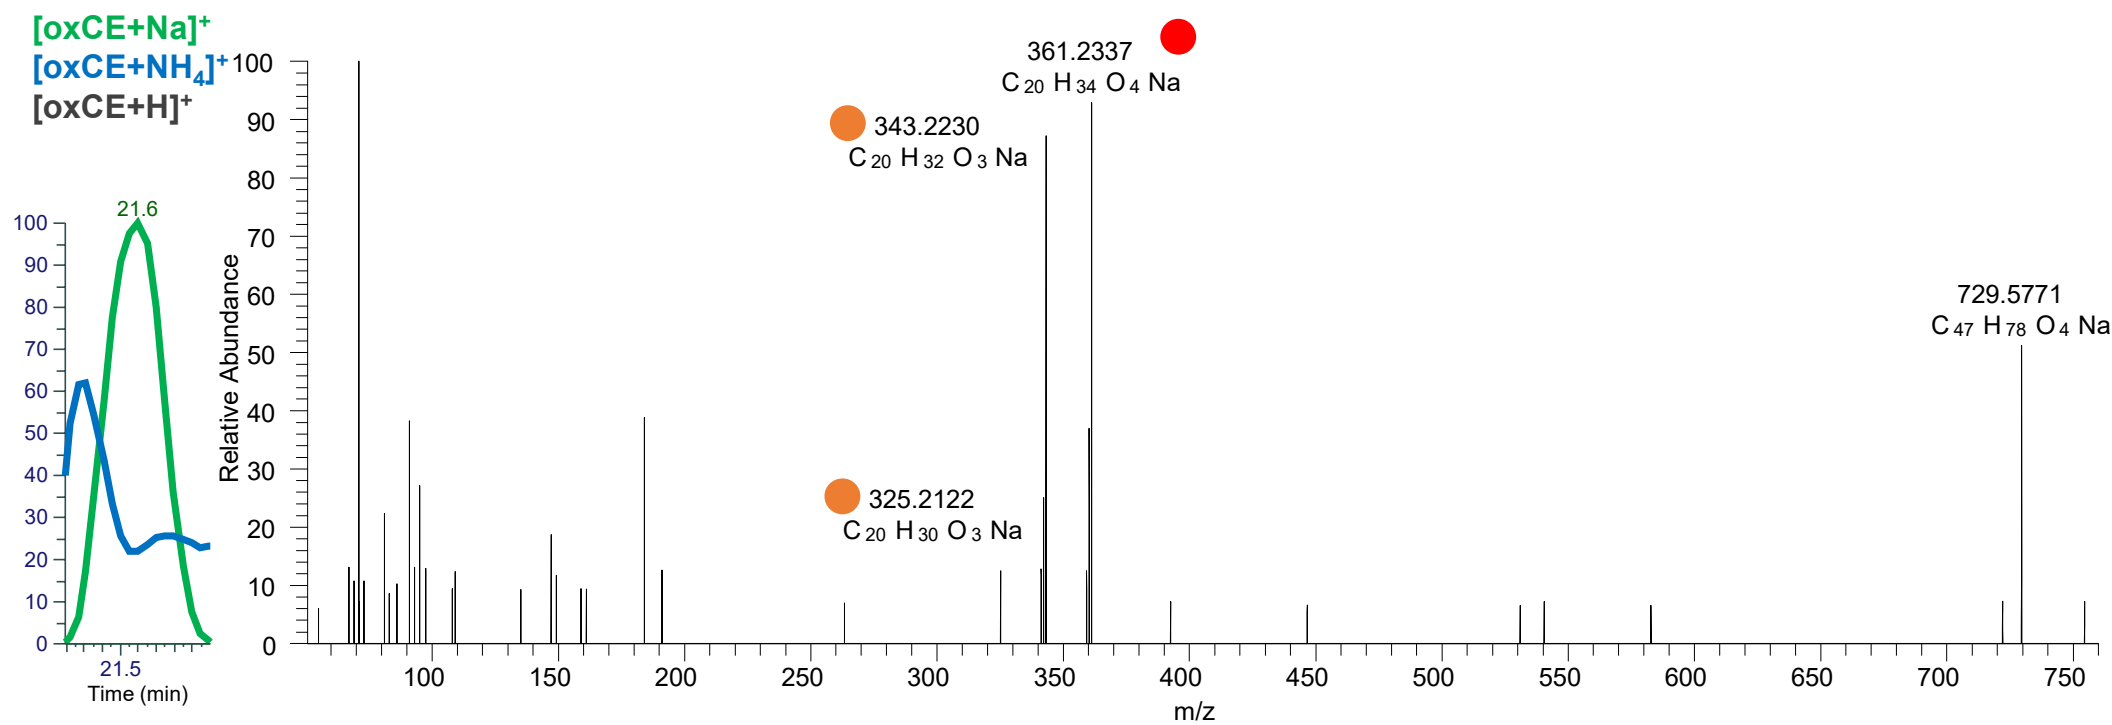

# CE(20:3<OH,O{9}>) RT 21.9

[oxCE+Na]<sup>+</sup>

XIC 729.5792 NL: 1.05E5

- Fragments containing oxFAs
- Fragments related to water loss
- Fragments not containing oxFAs
- Position-specific fragments
- Fragments related to other oxLPPs

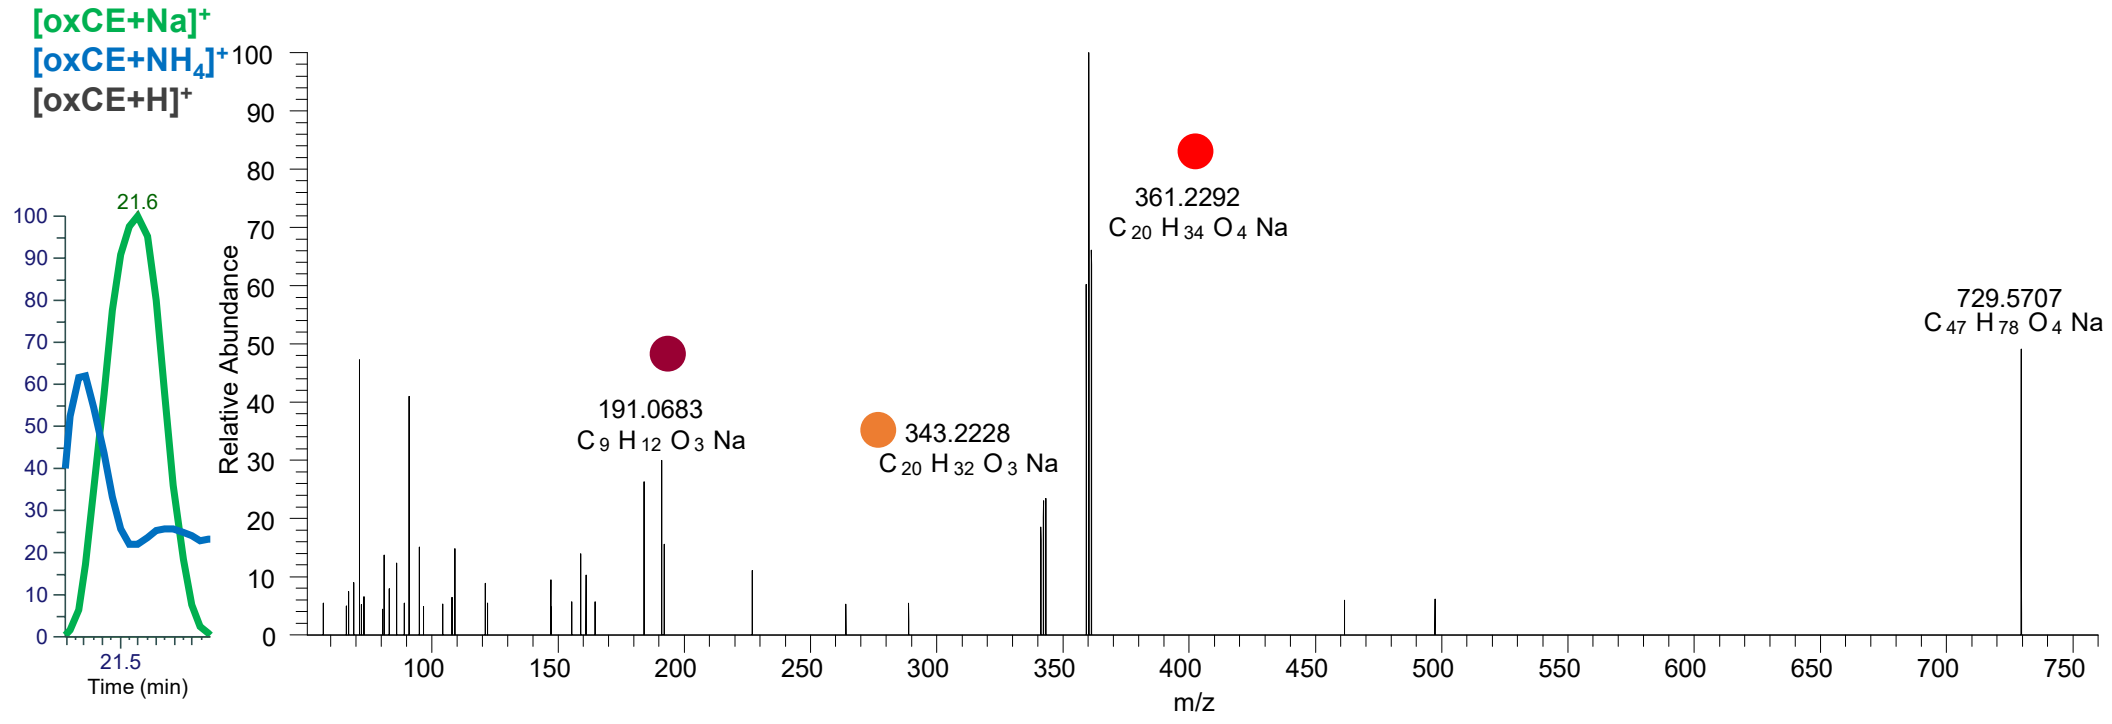

# CE(20:2<OH,ep>) RT 22.7

[oxCE+Na]<sup>+</sup>

XIC 729.5792 NL: 8.00E4

- Fragments containing oxFAs
- Fragments related to water loss
- Fragments not containing oxFAs
- Position-specific fragments
- Fragments related to other oxLPPs

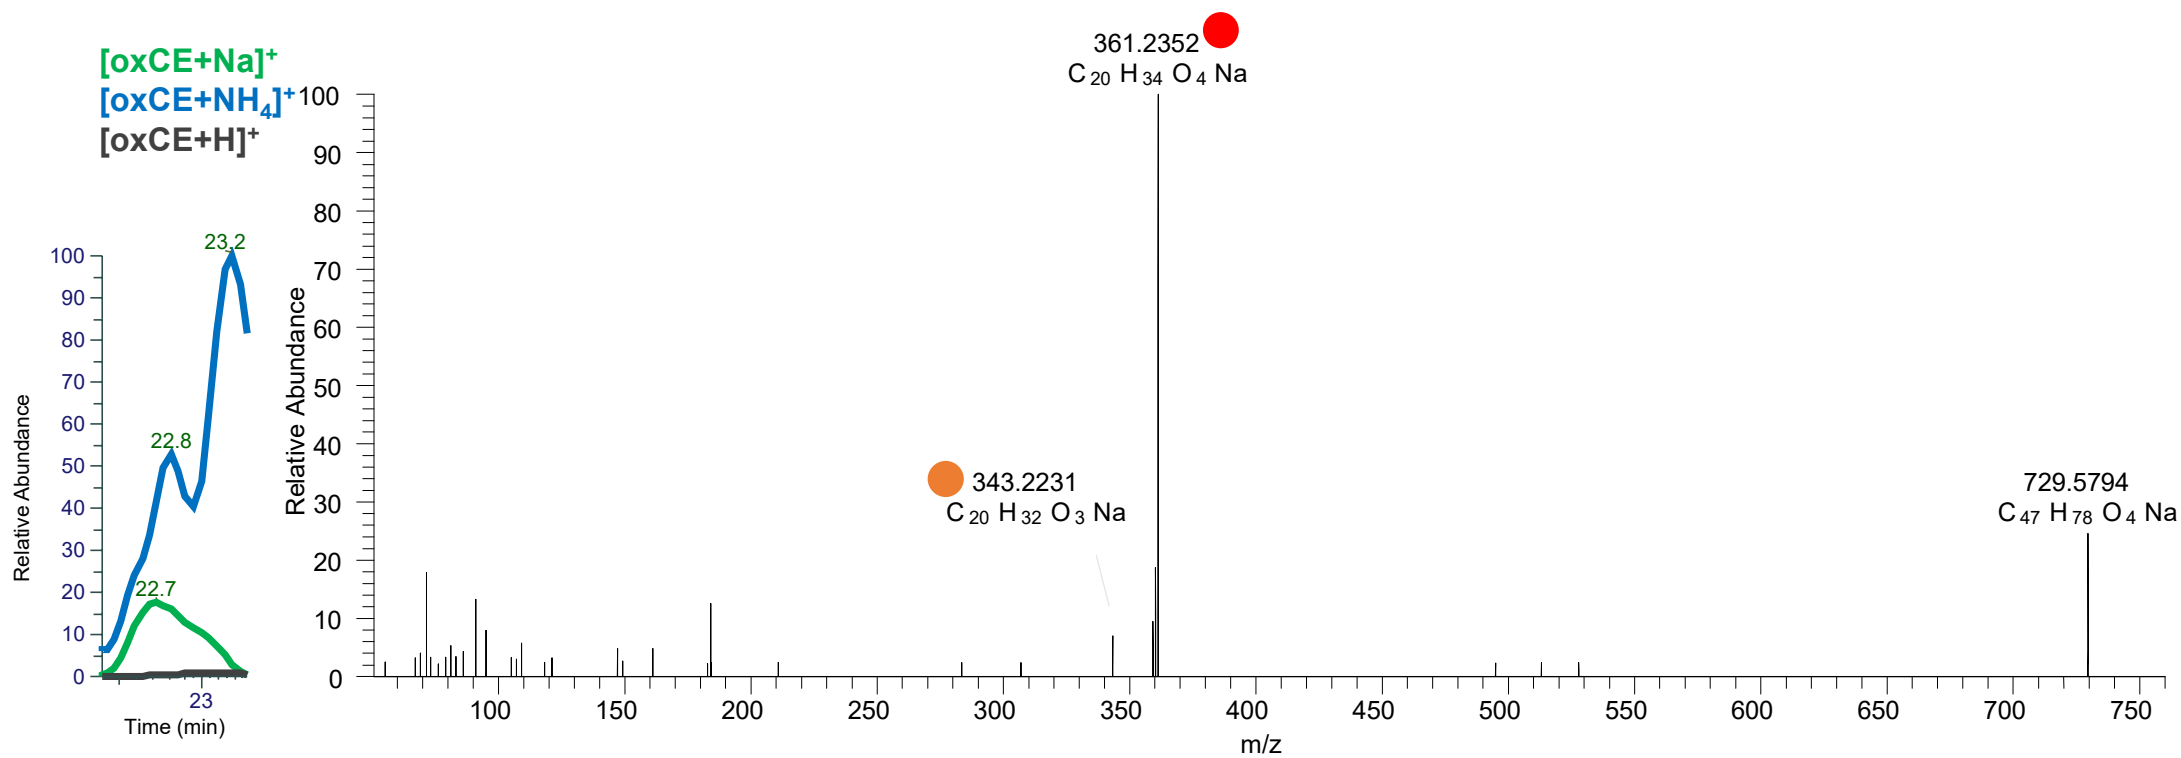



CE(20:3<OOH{15}>)  
CE(20:3<OOH{11}>)  
RT 23.7

[oxCE+Na]<sup>+</sup>

XIC 729.5792 NL: 1.45E5

- Fragments containing oxFAs
- Fragments related to water loss
- Fragments not containing oxFAs
- Position-specific fragments
- Fragments related to other oxLPPs

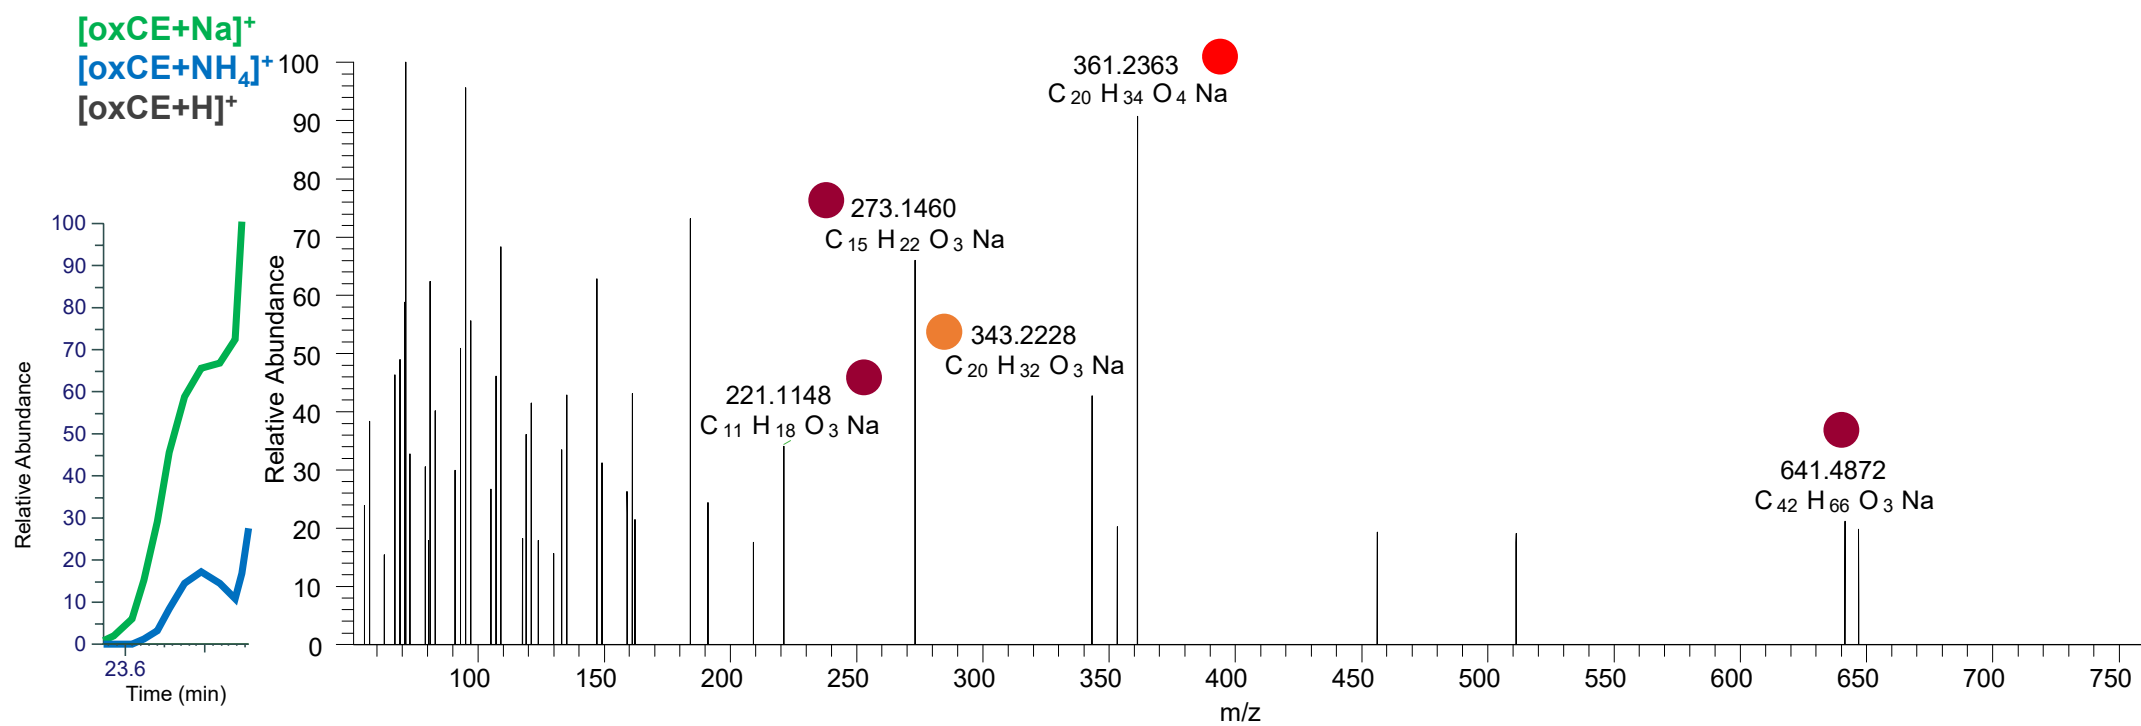

CE(20:3<OOH{15}>)  
 CE(20:3<OOH{12}>)  
 CE(20:3<OOH{11}>)  
 RT 23.9

[oxCE+Na]<sup>+</sup>

XIC 729.5792 NL: 8.16E5

● Fragments containing oxFAs

● Fragments related to water loss

● Fragments not containing oxFAs

● Position-specific fragments

● Fragments related to other oxLPPs

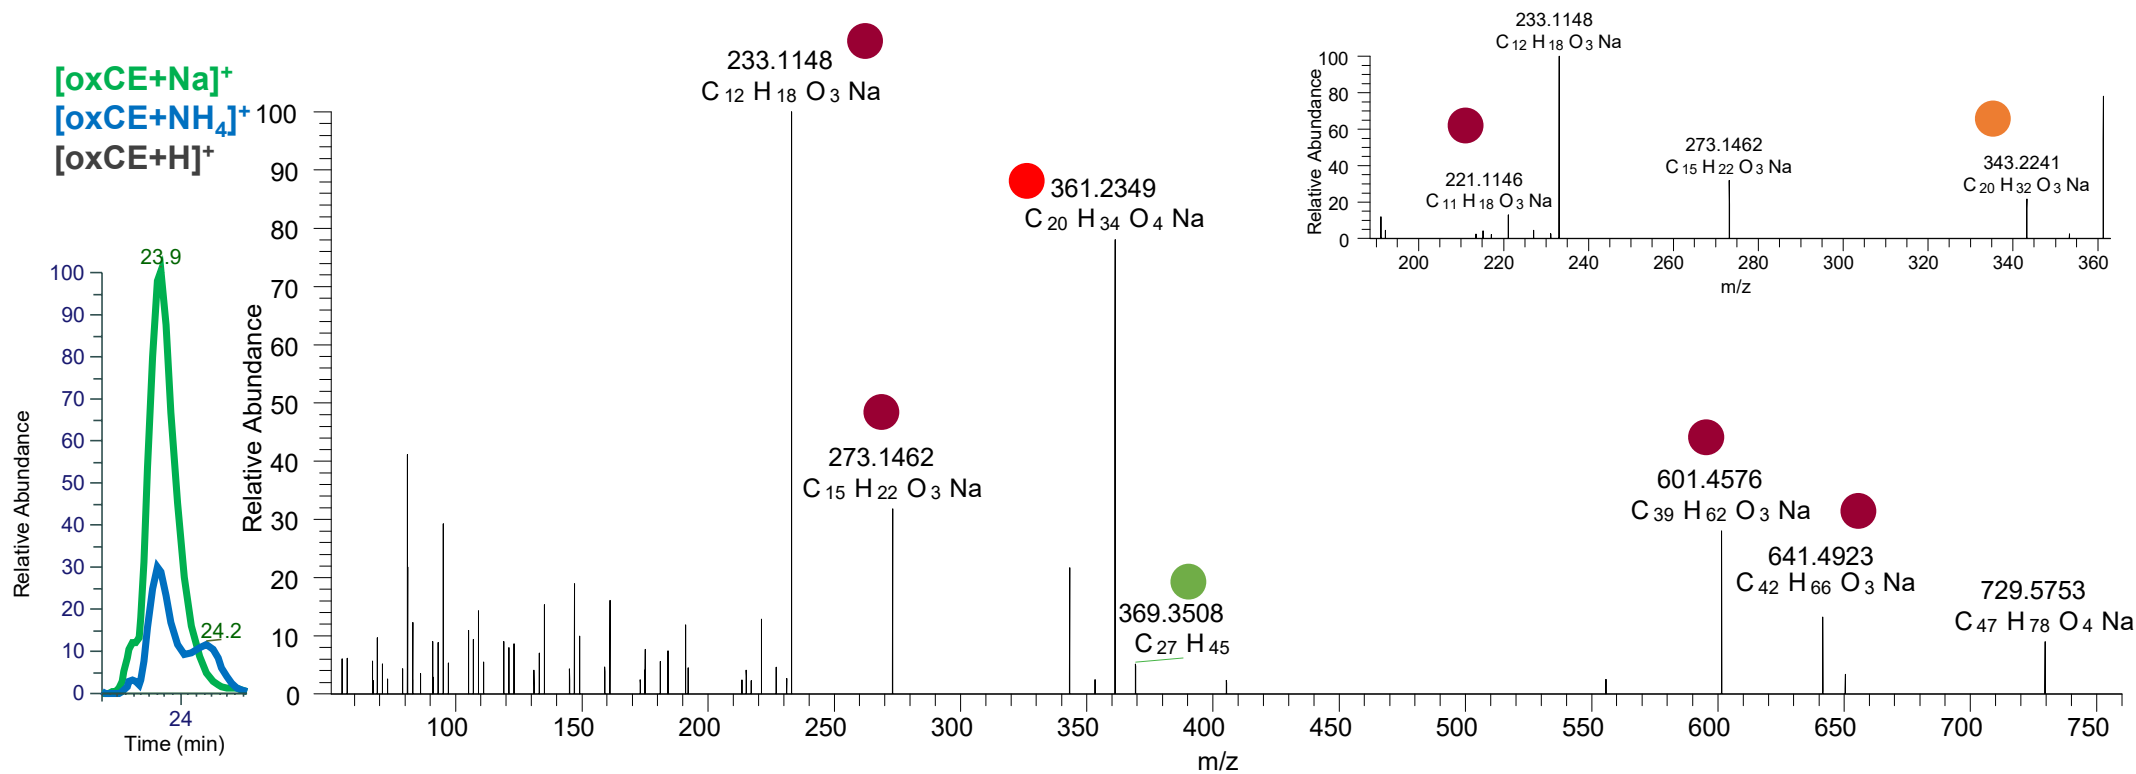

# CE(20:3<2O>)

## RT 24.2

[oxCE+Na]<sup>+</sup>

XIC 729.5792 NL: 8.16E5

- Fragments containing oxFAs
- Fragments related to water loss
- Fragments not containing oxFAs
- Position-specific fragments
- Fragments related to other oxLPPs

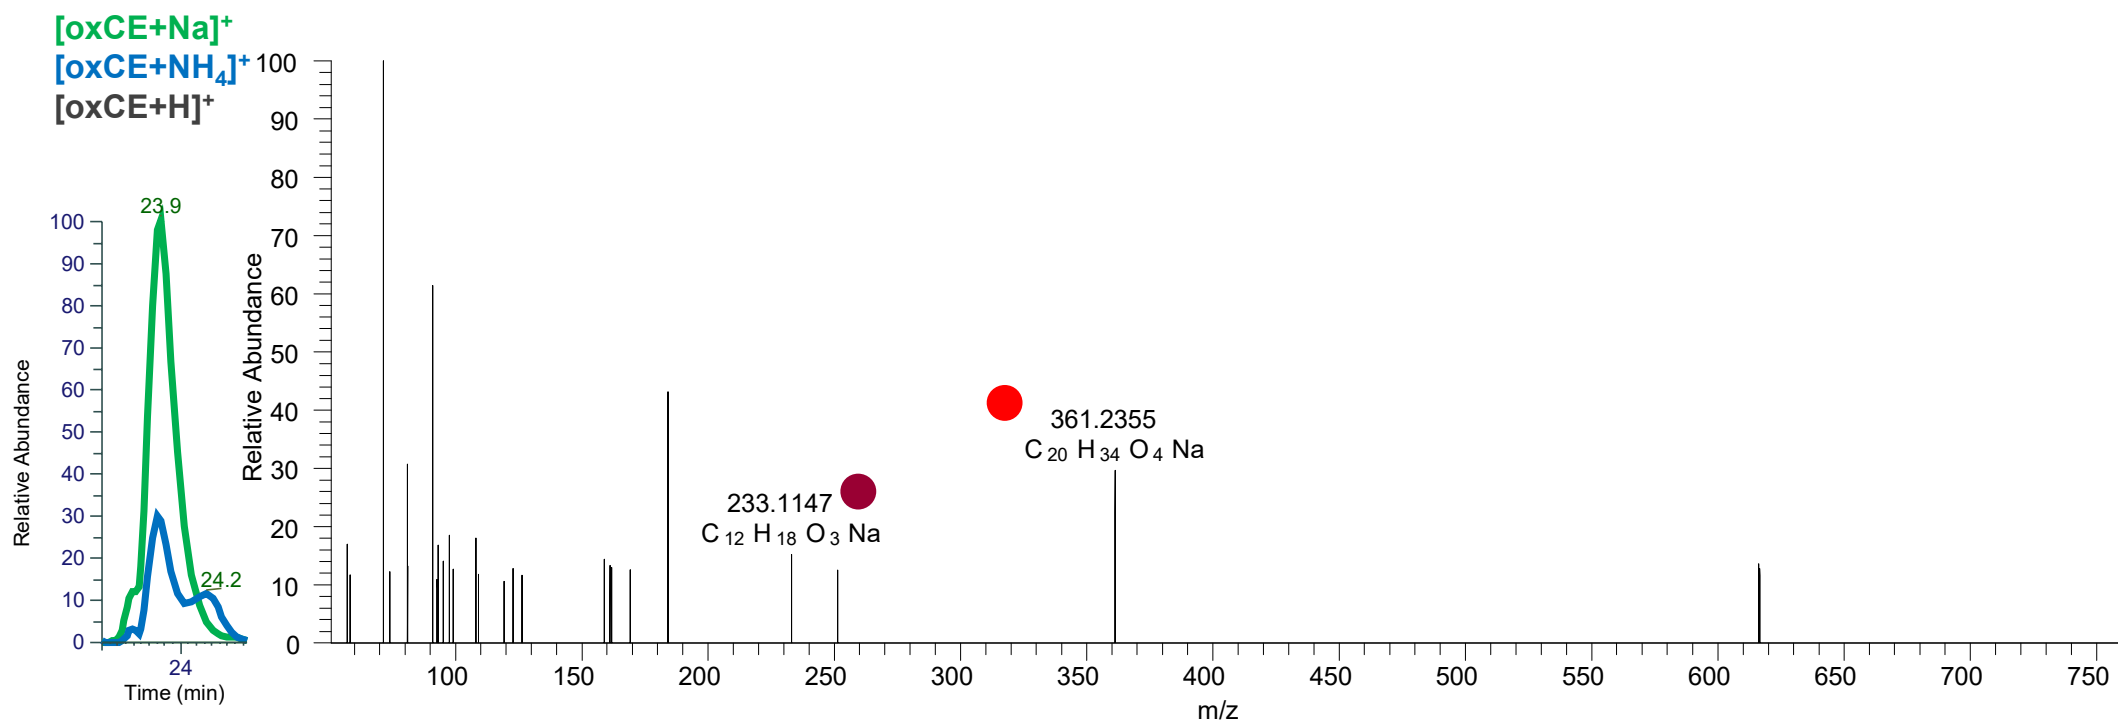

# CE(20:1<ep,O>) RT 24.5

[oxCE+Na]<sup>+</sup>

XIC 731.5949 NL: 2.81E4

- Fragments containing oxFAs
- Fragments related to water loss
- Fragments not containing oxFAs
- Position-specific fragments
- Fragments related to other oxLPPs

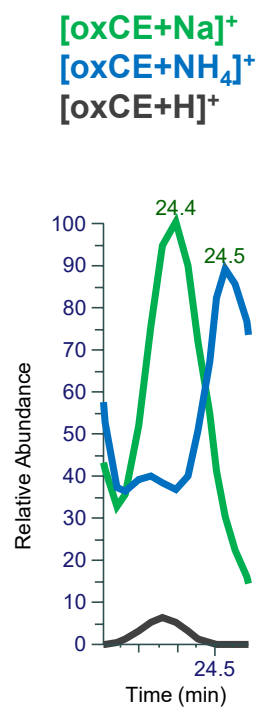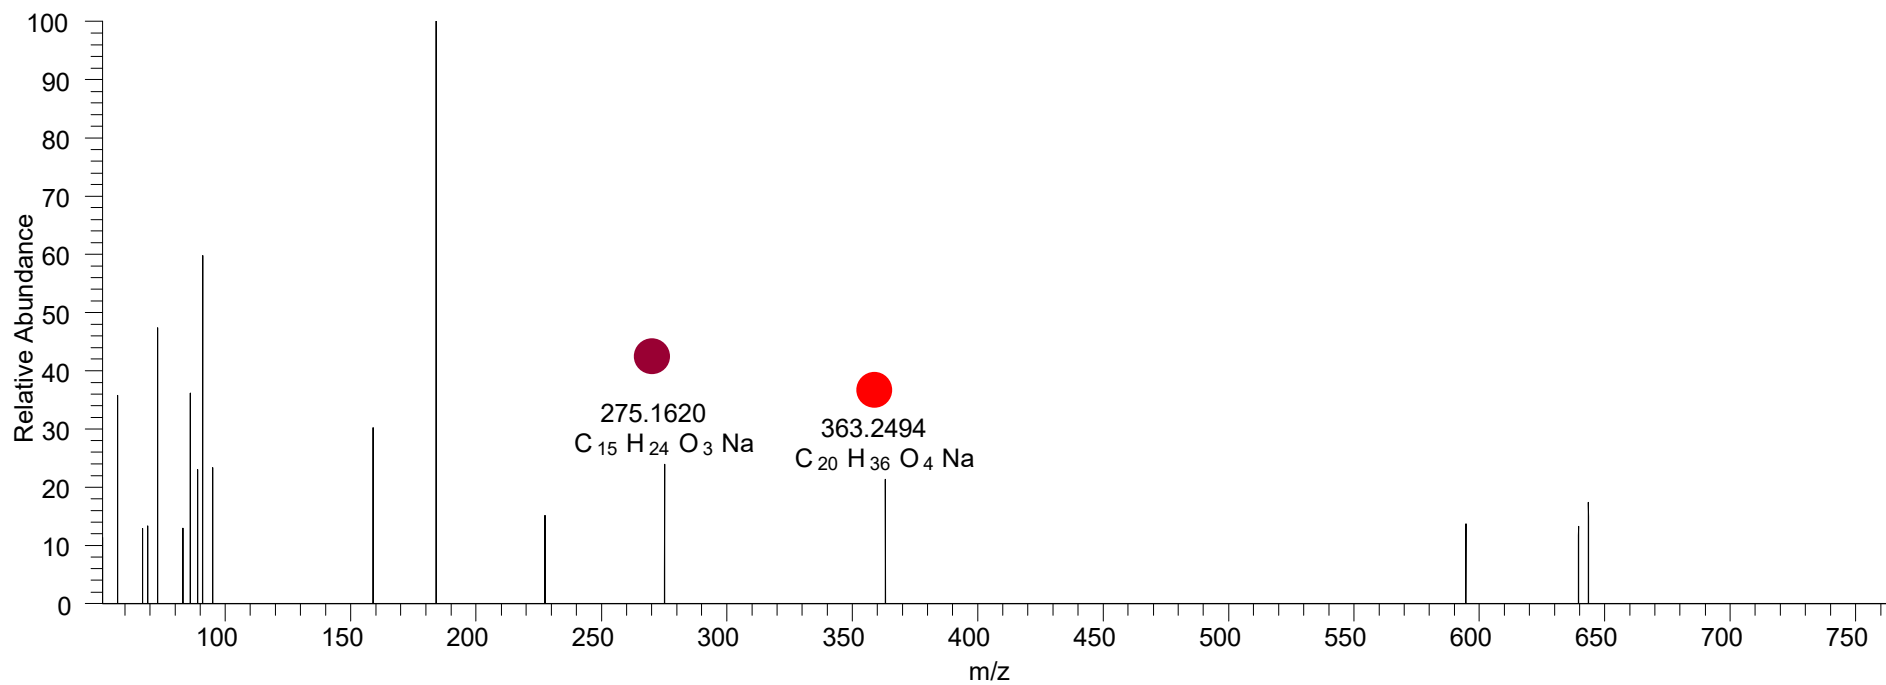

# CE(20:6<3O>) RT 20.4

[oxCE+Na]<sup>+</sup>

XIC 739.5272 NL: 2.51E4

- Fragments containing oxFAs
- Fragments related to water loss
- Fragments not containing oxFAs
- Position-specific fragments
- Fragments related to other oxLPPs

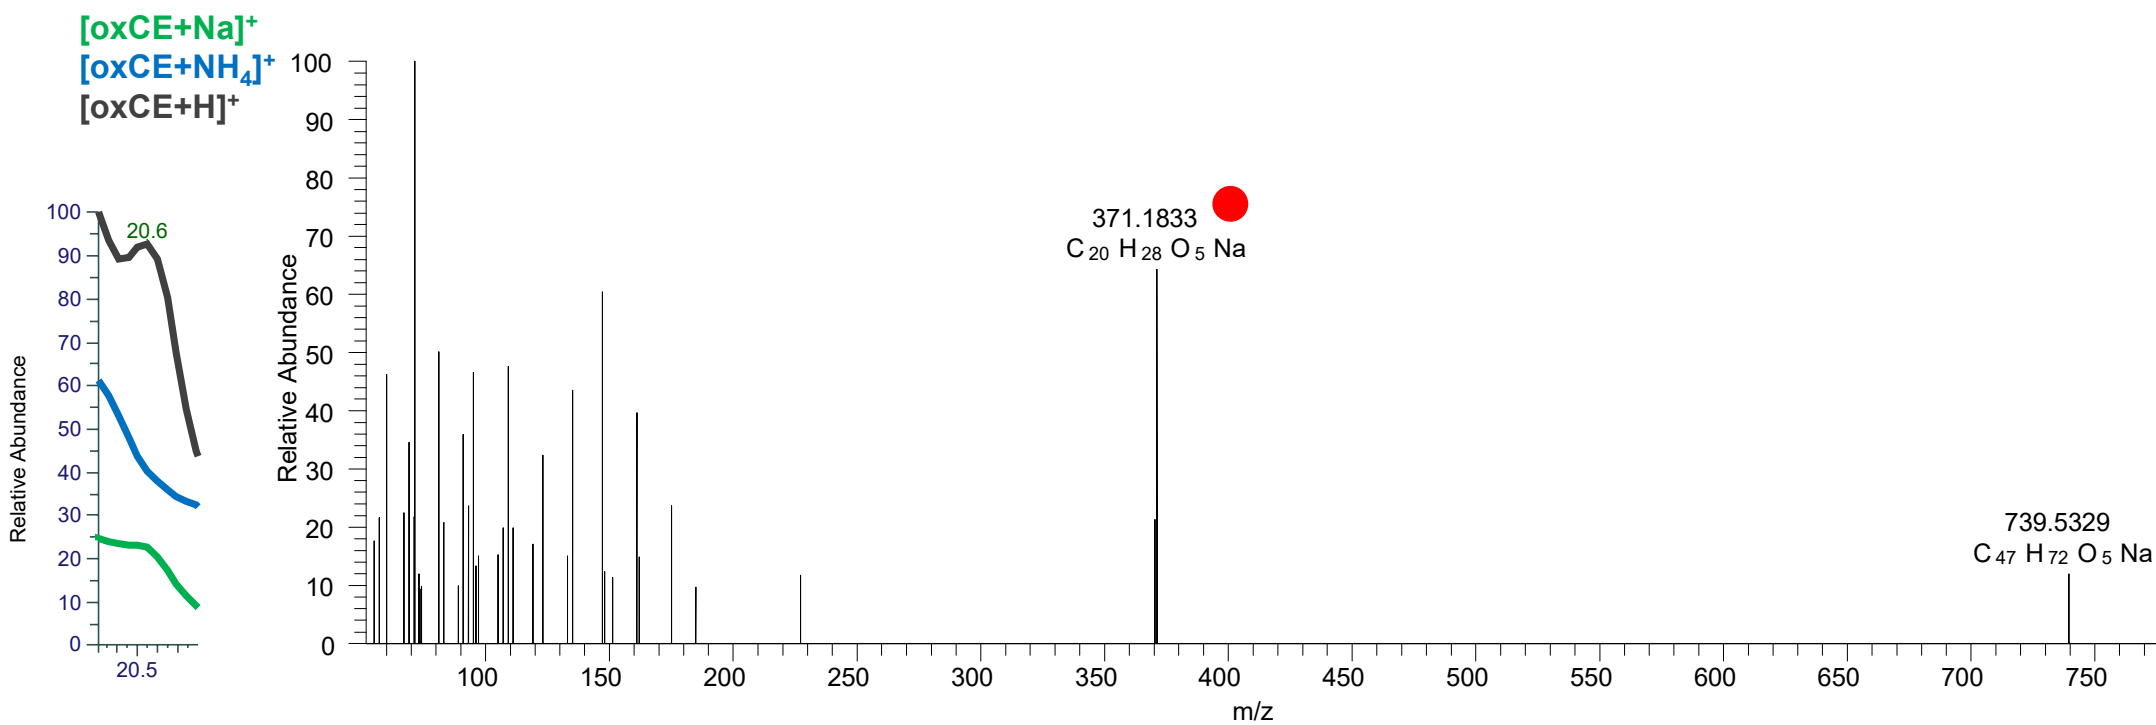

# CE(20:6<3O>) RT 21.6

[oxCE+Na]<sup>+</sup>

XIC 739.5272 NL: 8.20E4

- Fragments containing oxFAs
- Fragments related to water loss
- Fragments not containing oxFAs
- Position-specific fragments
- Fragments related to other oxLPPs

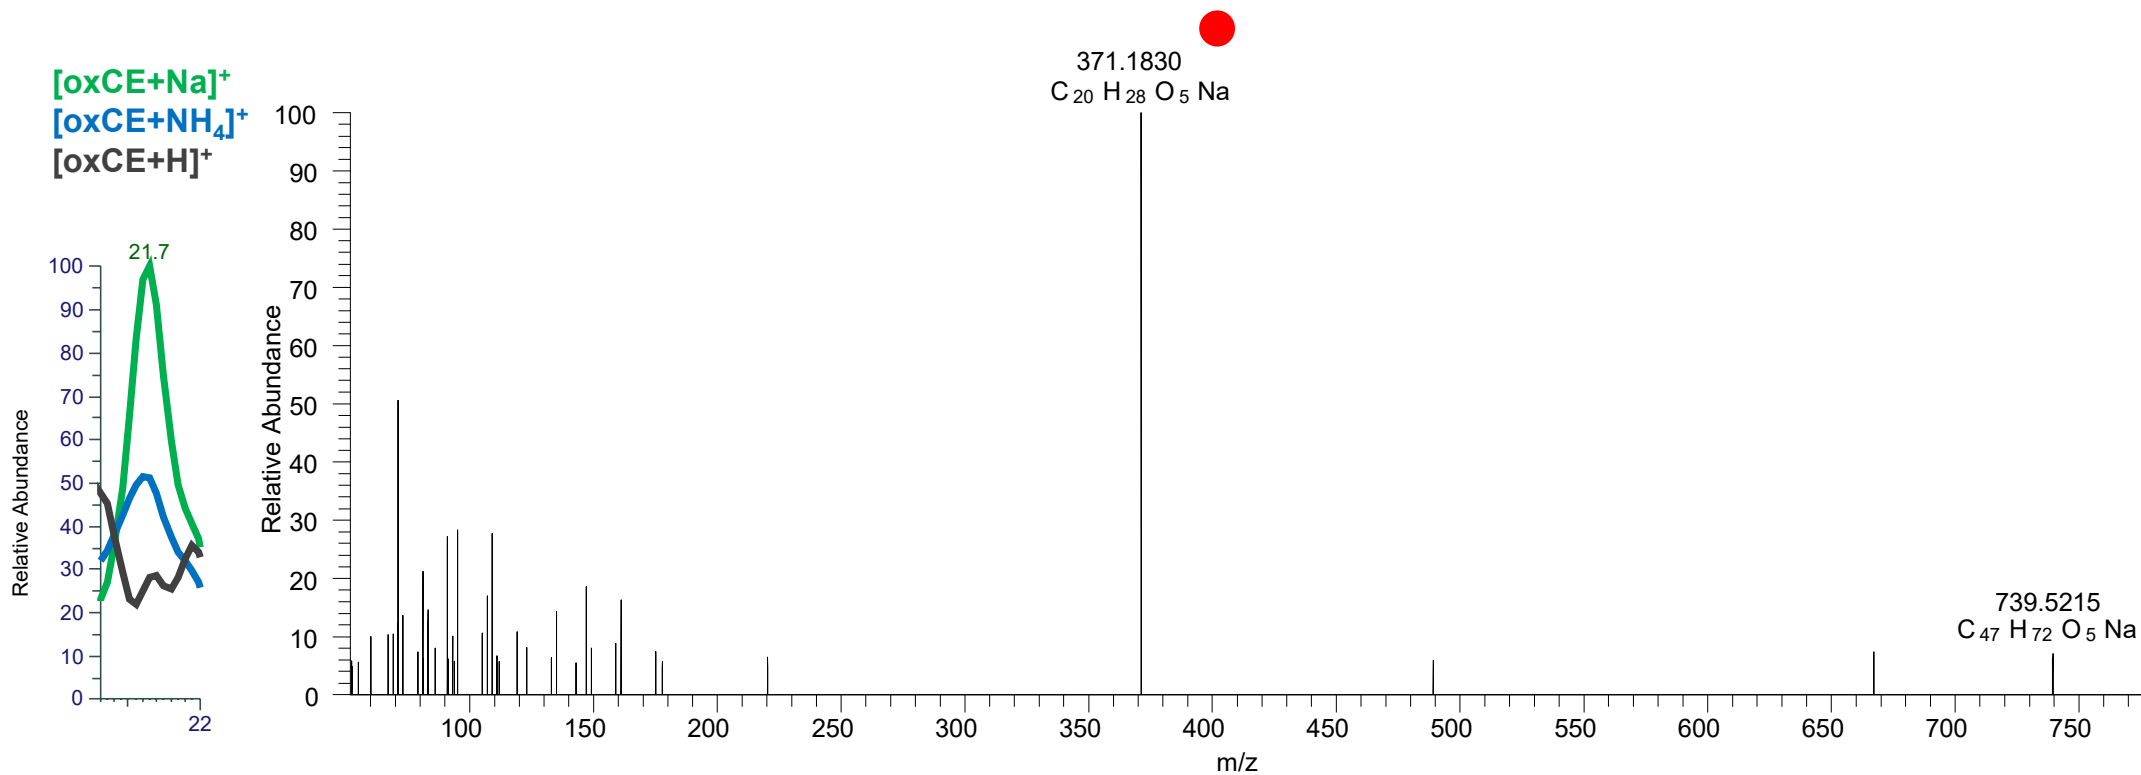

# CE(22:4<O>) RT 24.4

[oxCE+Na]<sup>+</sup>

XIC 739.6000 NL: 2.37E4

- Fragments containing oxFAs
- Fragments related to water loss
- Fragments not containing oxFAs
- Position-specific fragments
- Fragments related to other oxLPPs

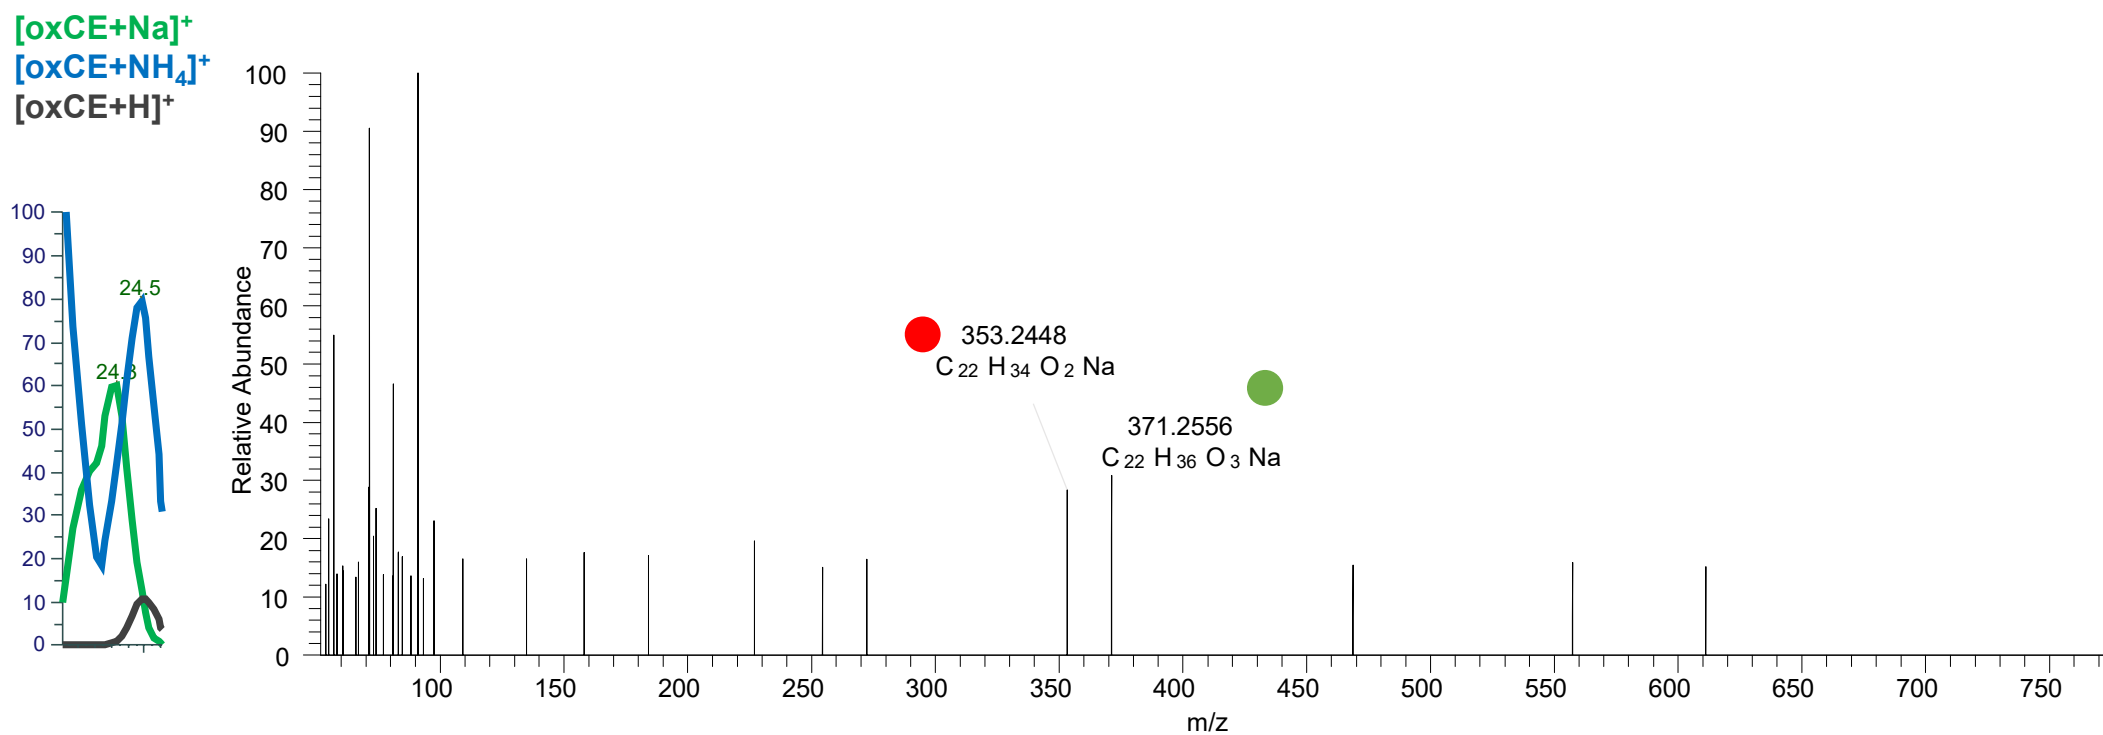

# CE(20:5<OH,OOH{15}>) CE(20:5<O,OOH{9}>) RT 20.5

[oxCE+Na]<sup>+</sup>

XIC 741.5428 NL: 3.16E5

- Fragments containing oxFAs
- Fragments related to water loss
- Fragments not containing oxFAs
- Position-specific fragments
- Fragments related to other oxLPPs

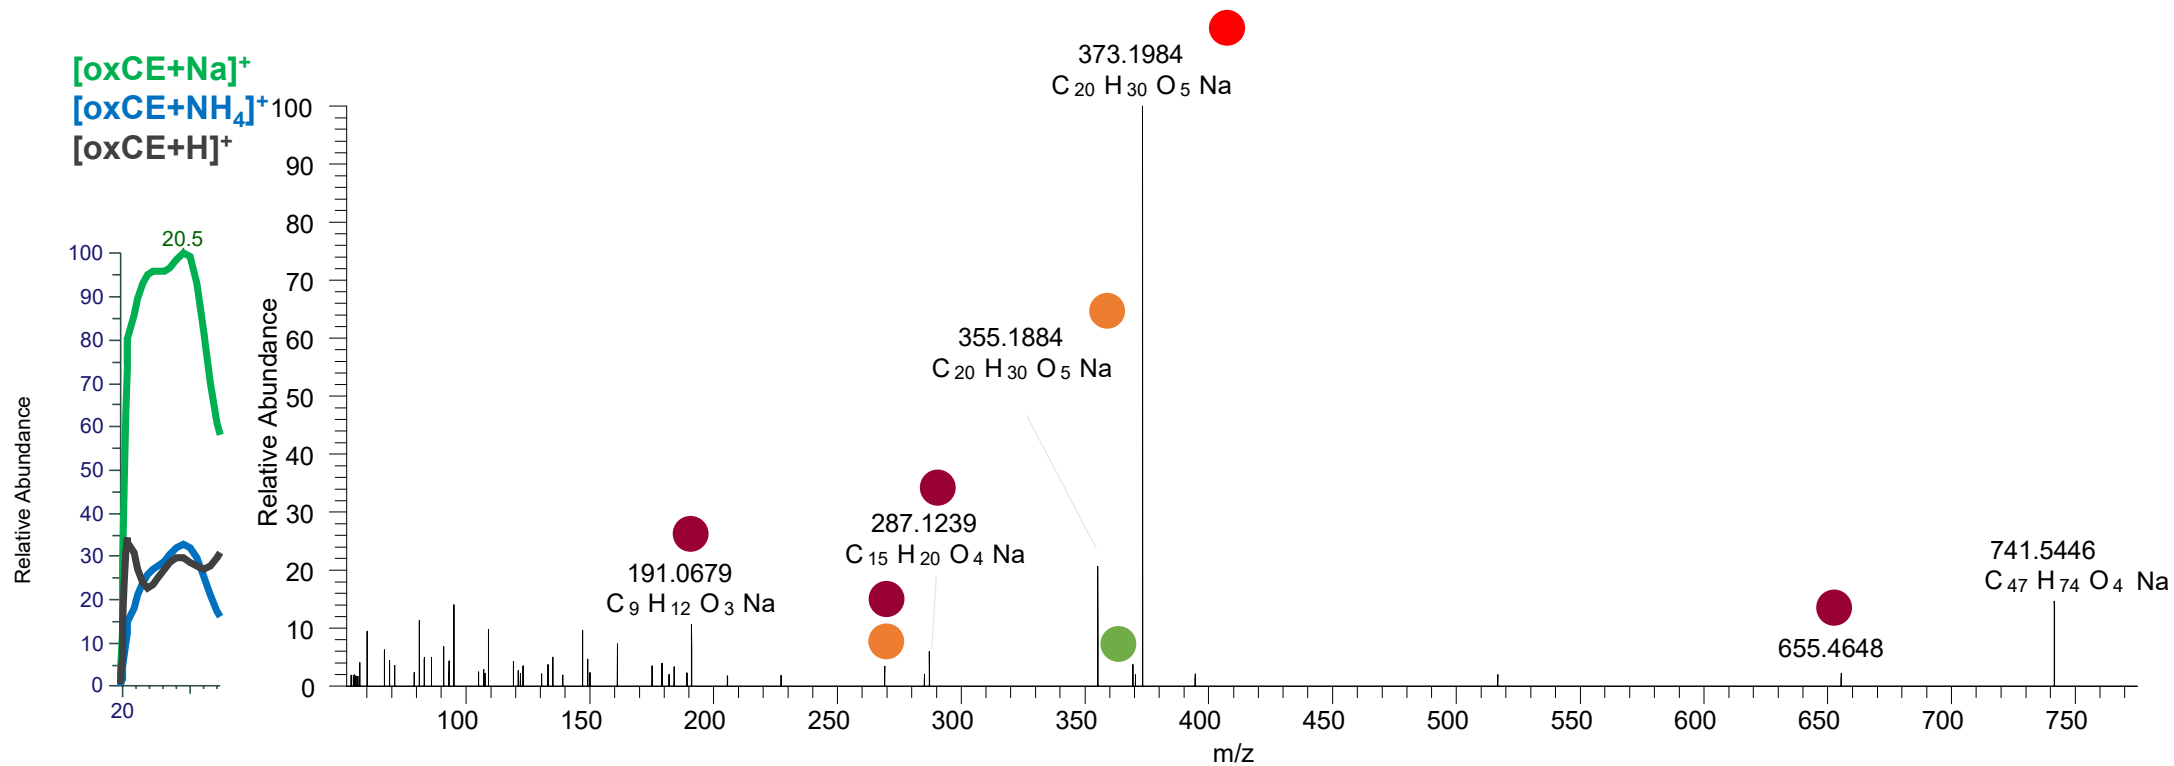



# CE(20:4<oxo,OH,O>) RT 21.1

[oxCE+Na]<sup>+</sup>

XIC 741.5428 NL: 2.18E5

- Fragments containing oxFAs
- Fragments related to water loss
- Fragments not containing oxFAs
- Position-specific fragments
- Fragments related to other oxLPPs

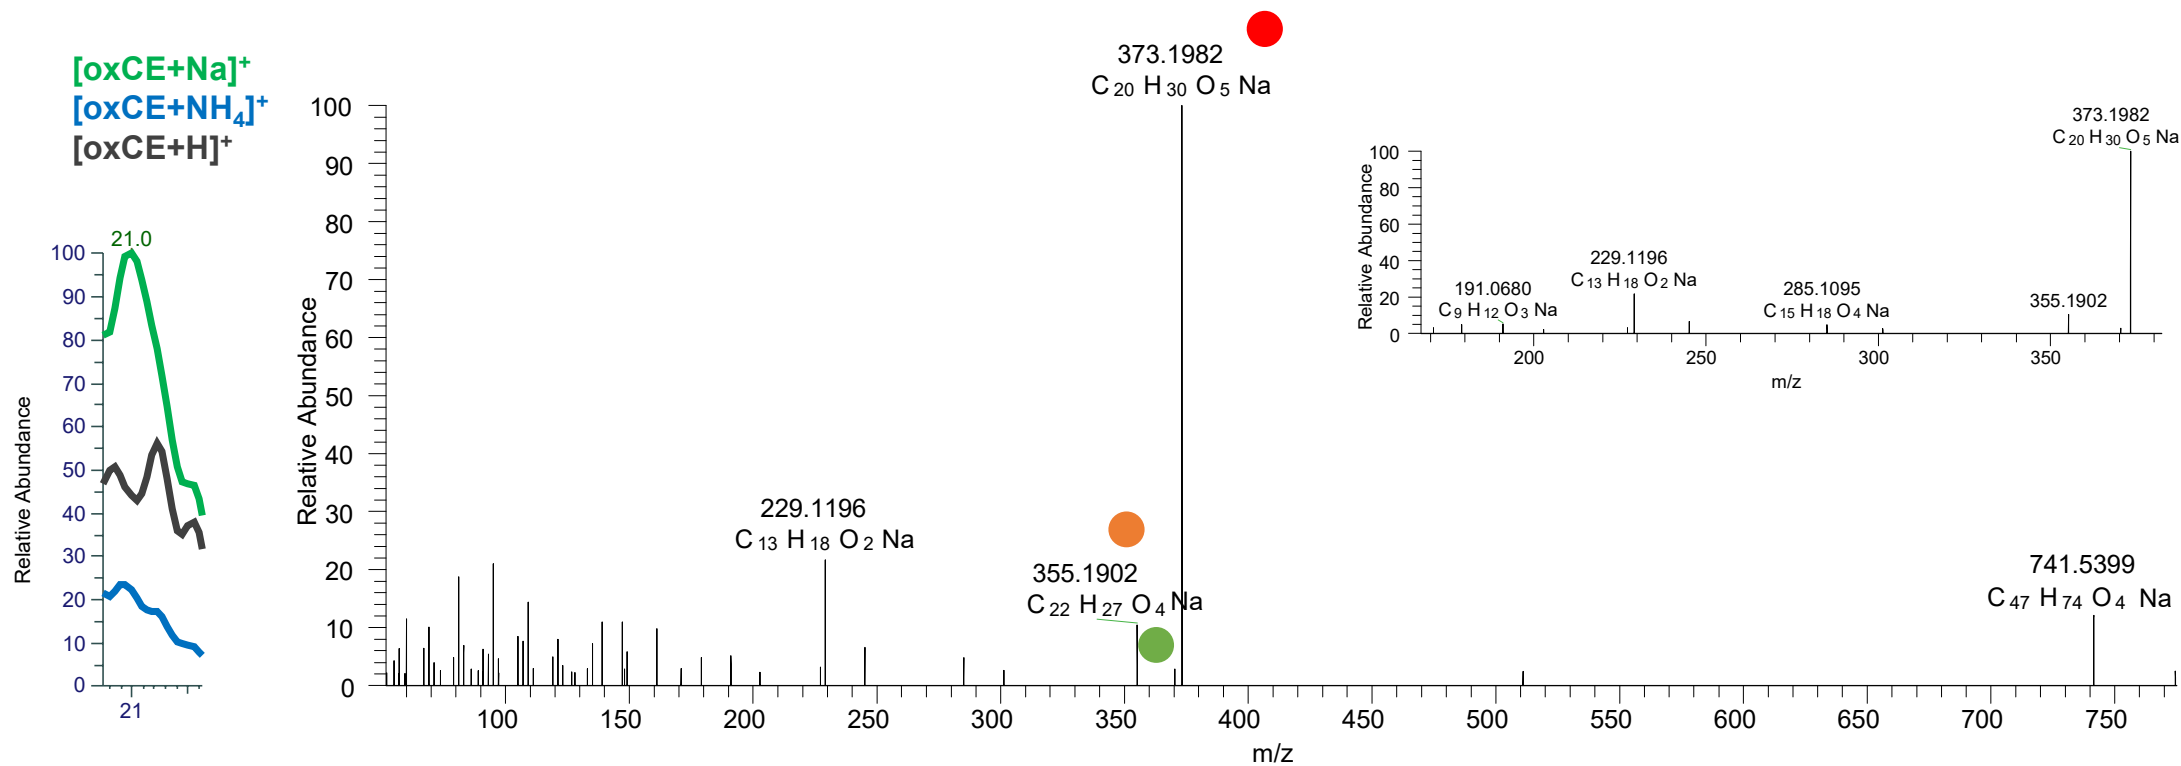

# CE(20:3<oxo,OH,O>) RT 21.9

[oxCE+Na]<sup>+</sup>

XIC 741.5428 NL: 1.01E5

- Fragments containing oxFAs
- Fragments related to water loss
- Fragments not containing oxFAs
- Position-specific fragments
- Fragments related to other oxLPPs

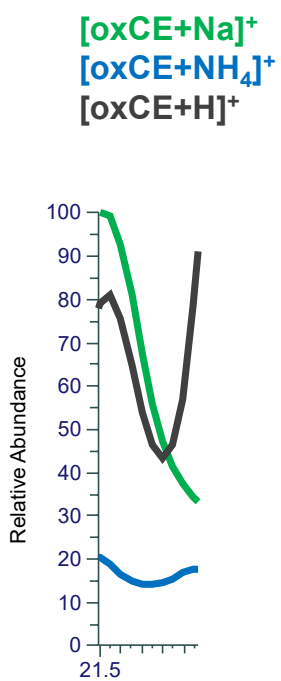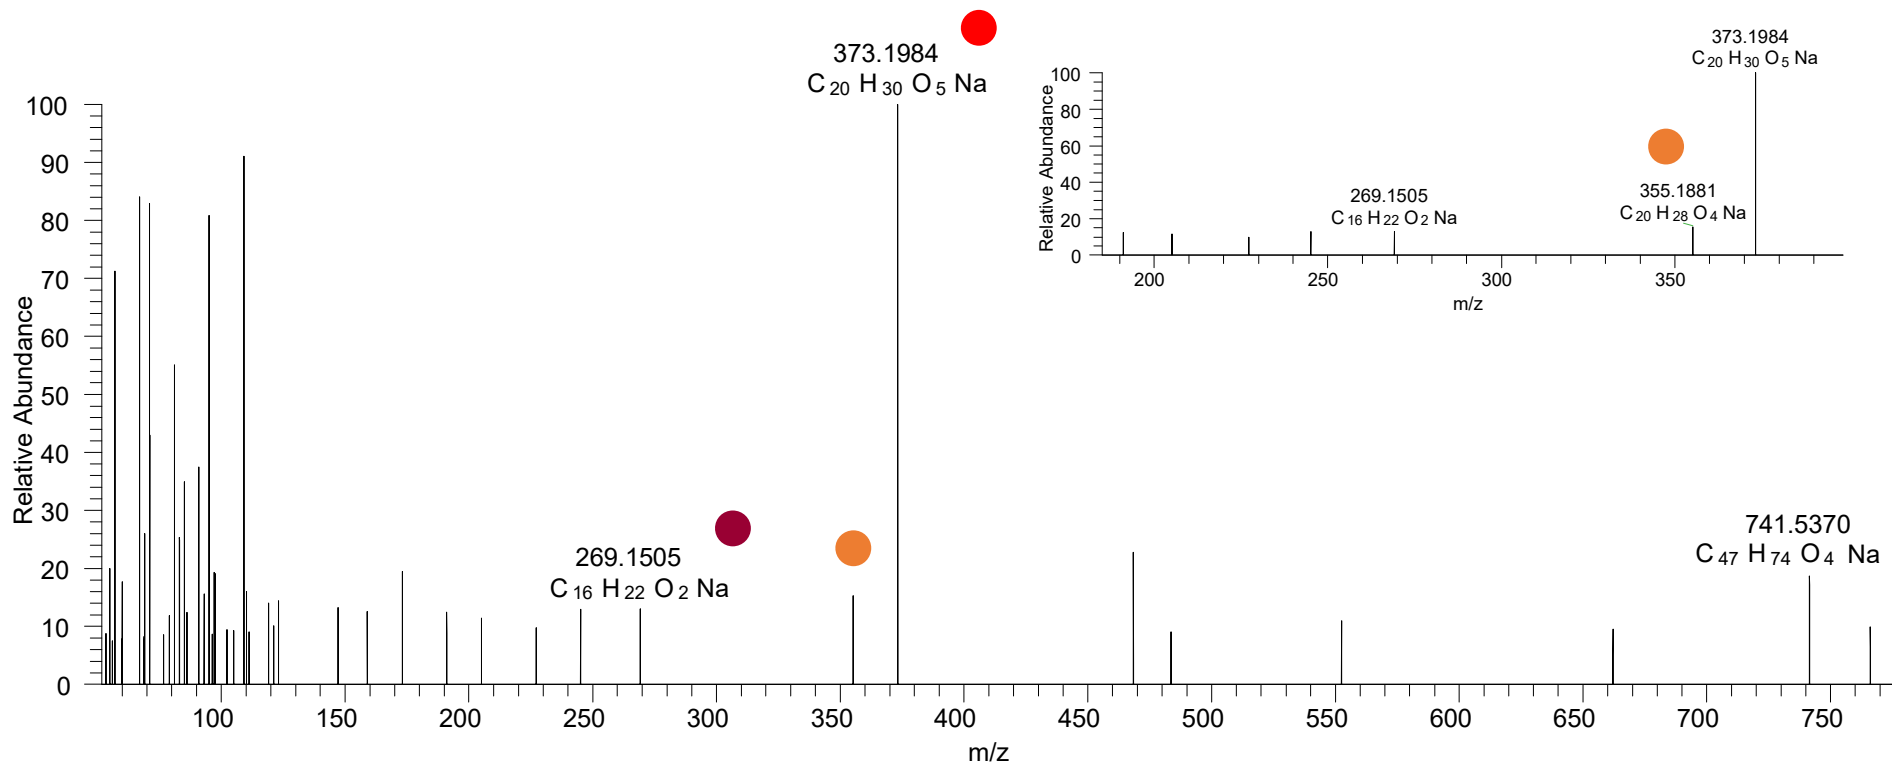

# CE(20:4<2OH,O>) RT 19.5

[oxCE+Na]<sup>+</sup>

XIC 743.5585 NL: 2.40E5

- Fragments containing oxFAs
- Fragments related to water loss
- Fragments not containing oxFAs
- Position-specific fragments
- Fragments related to other oxLPPs

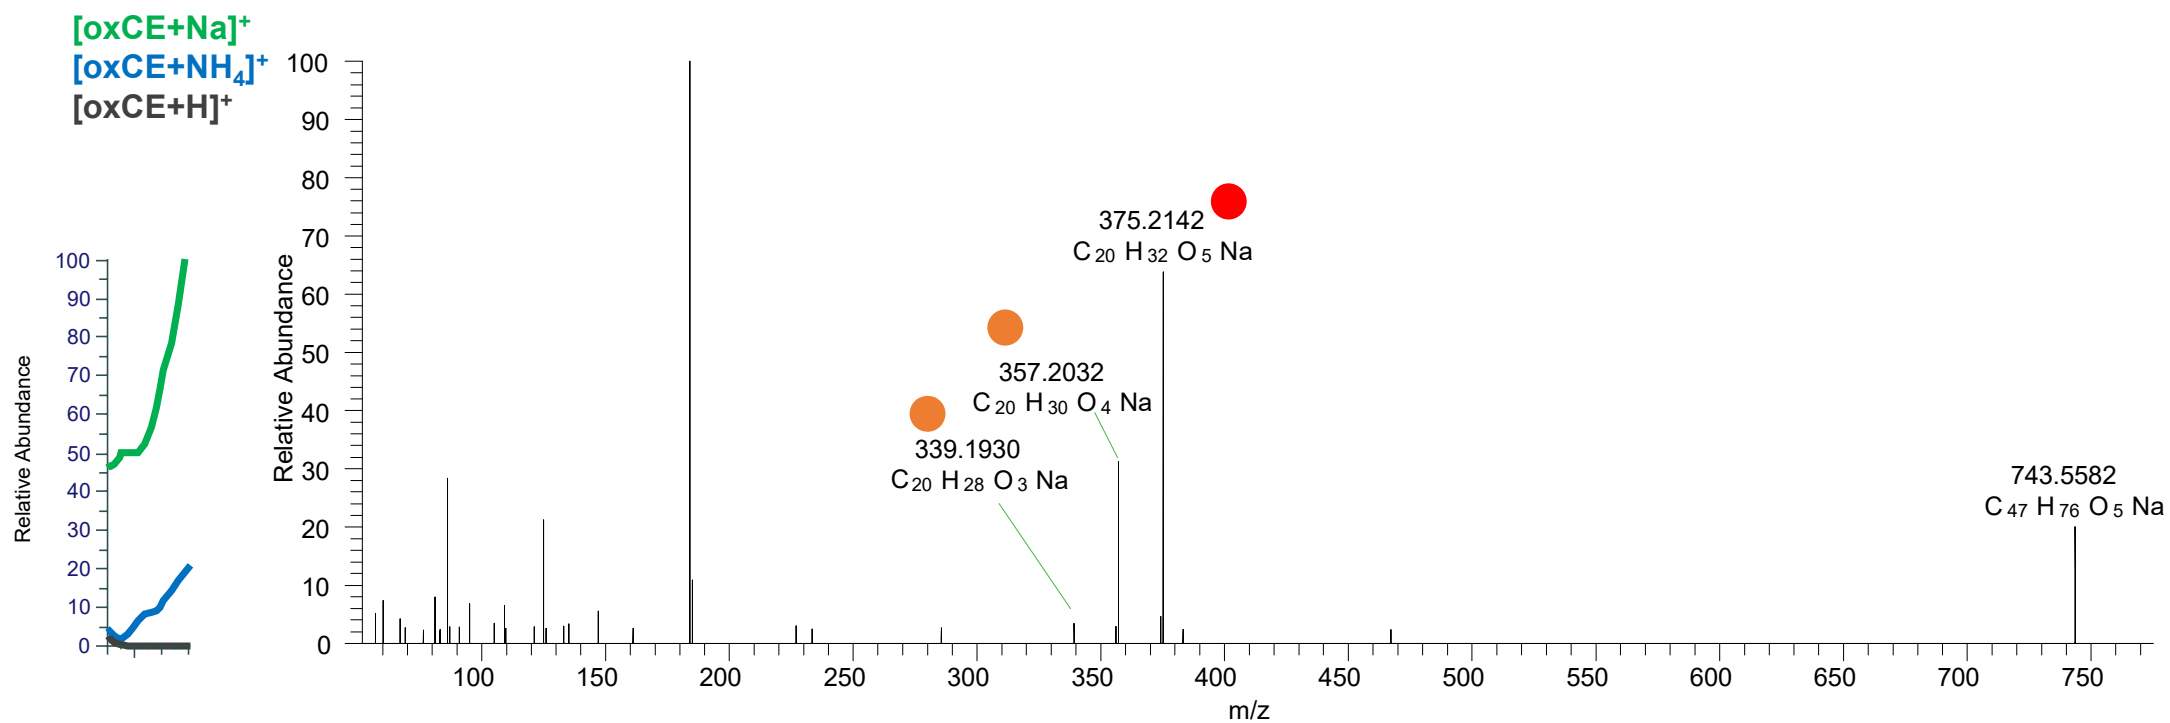

# CE(20:4<2OH,O>) RT 20.1

[oxCE+Na]<sup>+</sup>

XIC 743.5585 NL: 6.46E5

- Fragments containing oxFAs
- Fragments related to water loss
- Fragments not containing oxFAs
- Position-specific fragments
- Fragments related to other oxLPPs

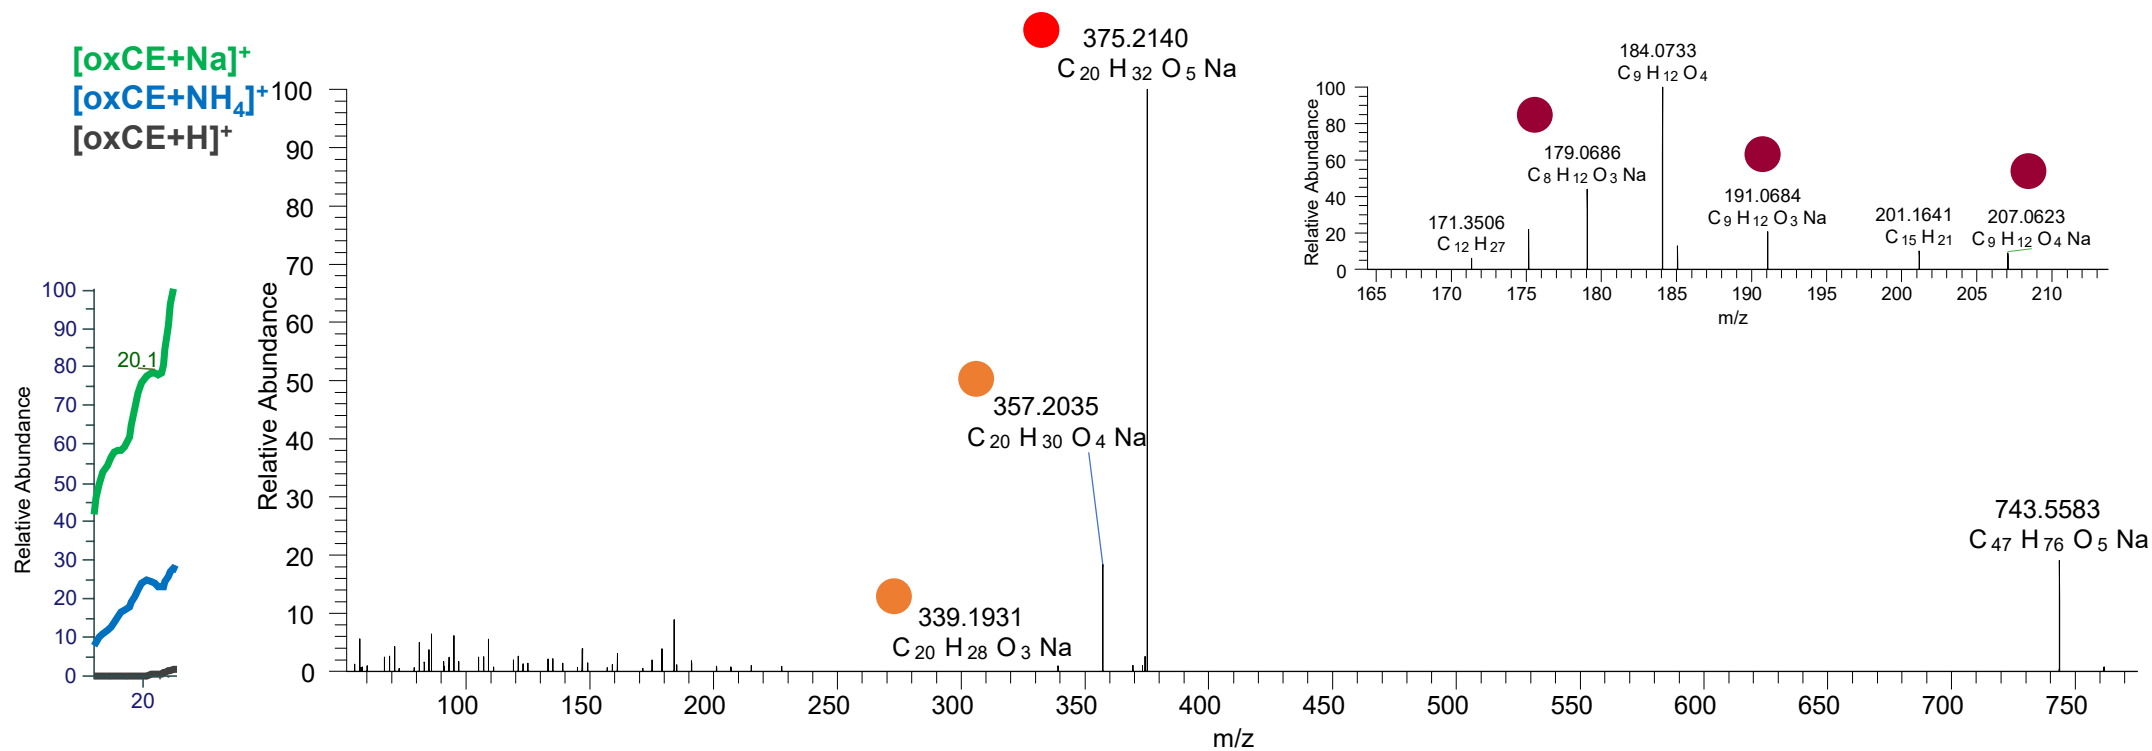

# CE(20:4<2OH,O>) RT 20.7

[oxCE+Na]<sup>+</sup>

XIC 743.5585 NL: 1.62E6

- Fragments containing oxFAs
- Fragments related to water loss
- Fragments not containing oxFAs
- Position-specific fragments
- Fragments related to other oxLPPs

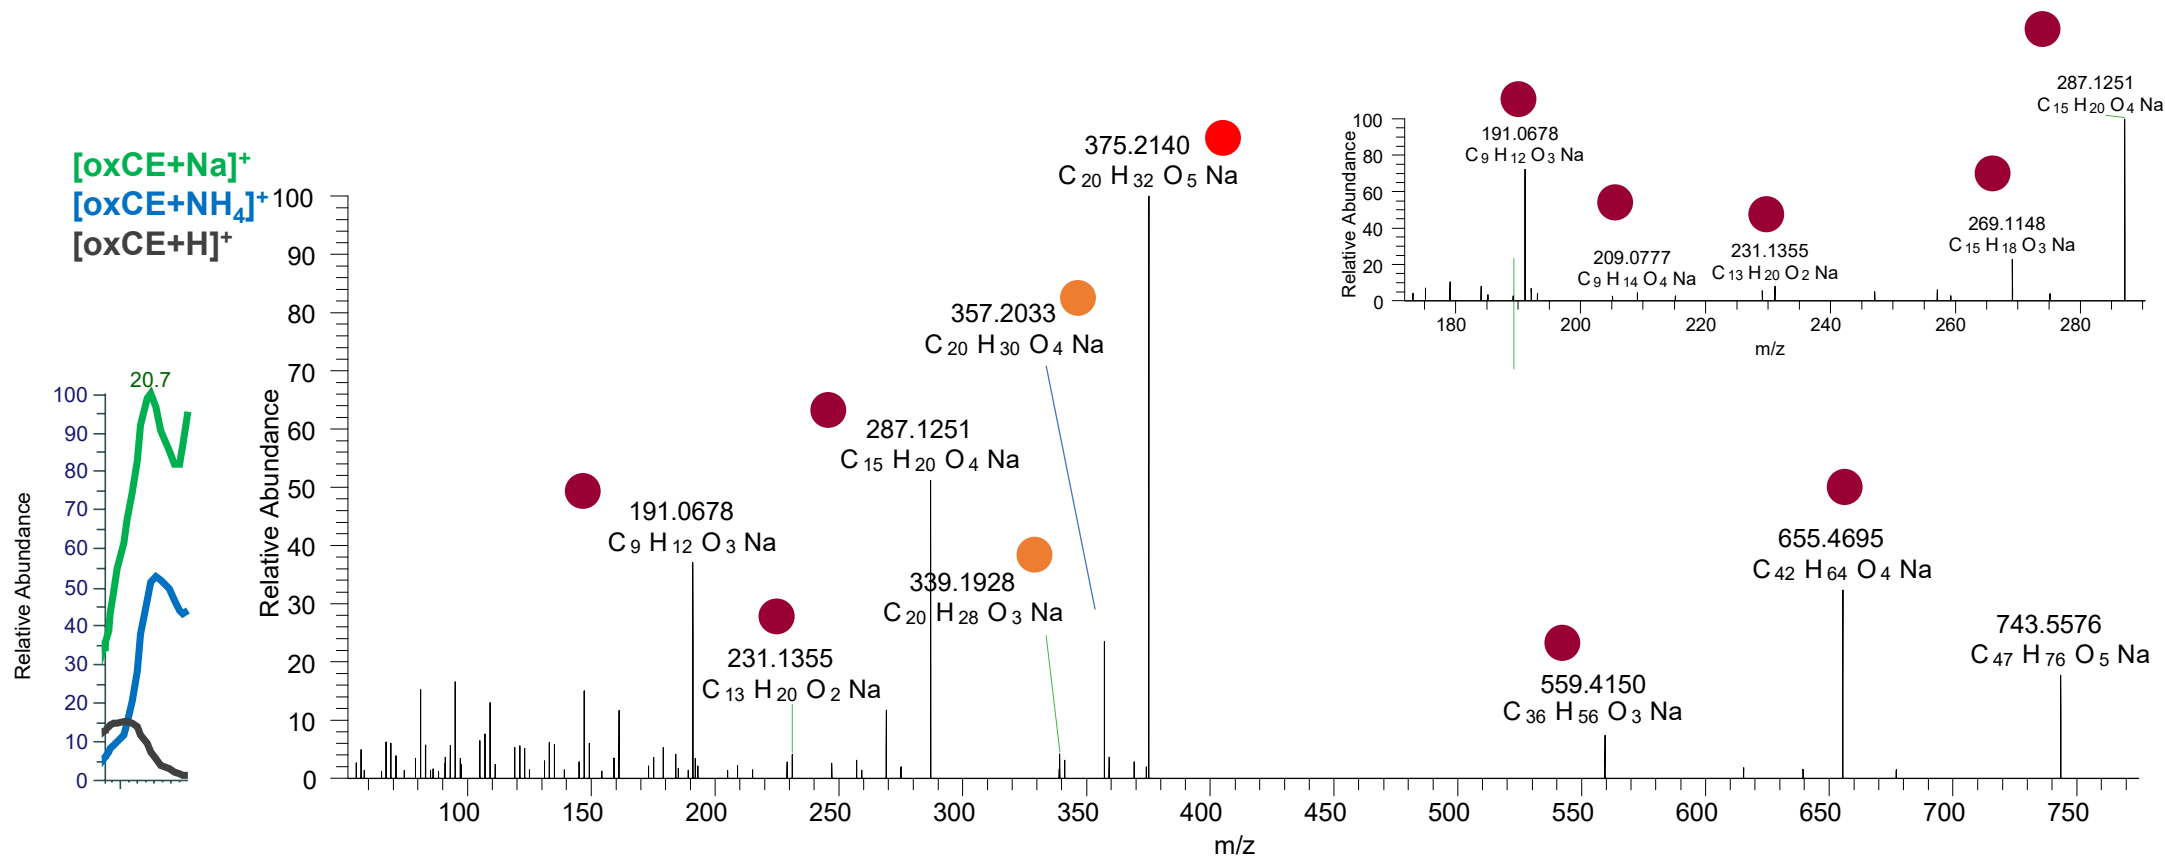

# CE(20:4<2OH,O>) RT 21.1

[oxCE+Na]<sup>+</sup>

XIC 743.5585 NL: 1.88E6

- Fragments containing oxFAs
- Fragments related to water loss
- Fragments not containing oxFAs
- Position-specific fragments
- Fragments related to other oxLPPs

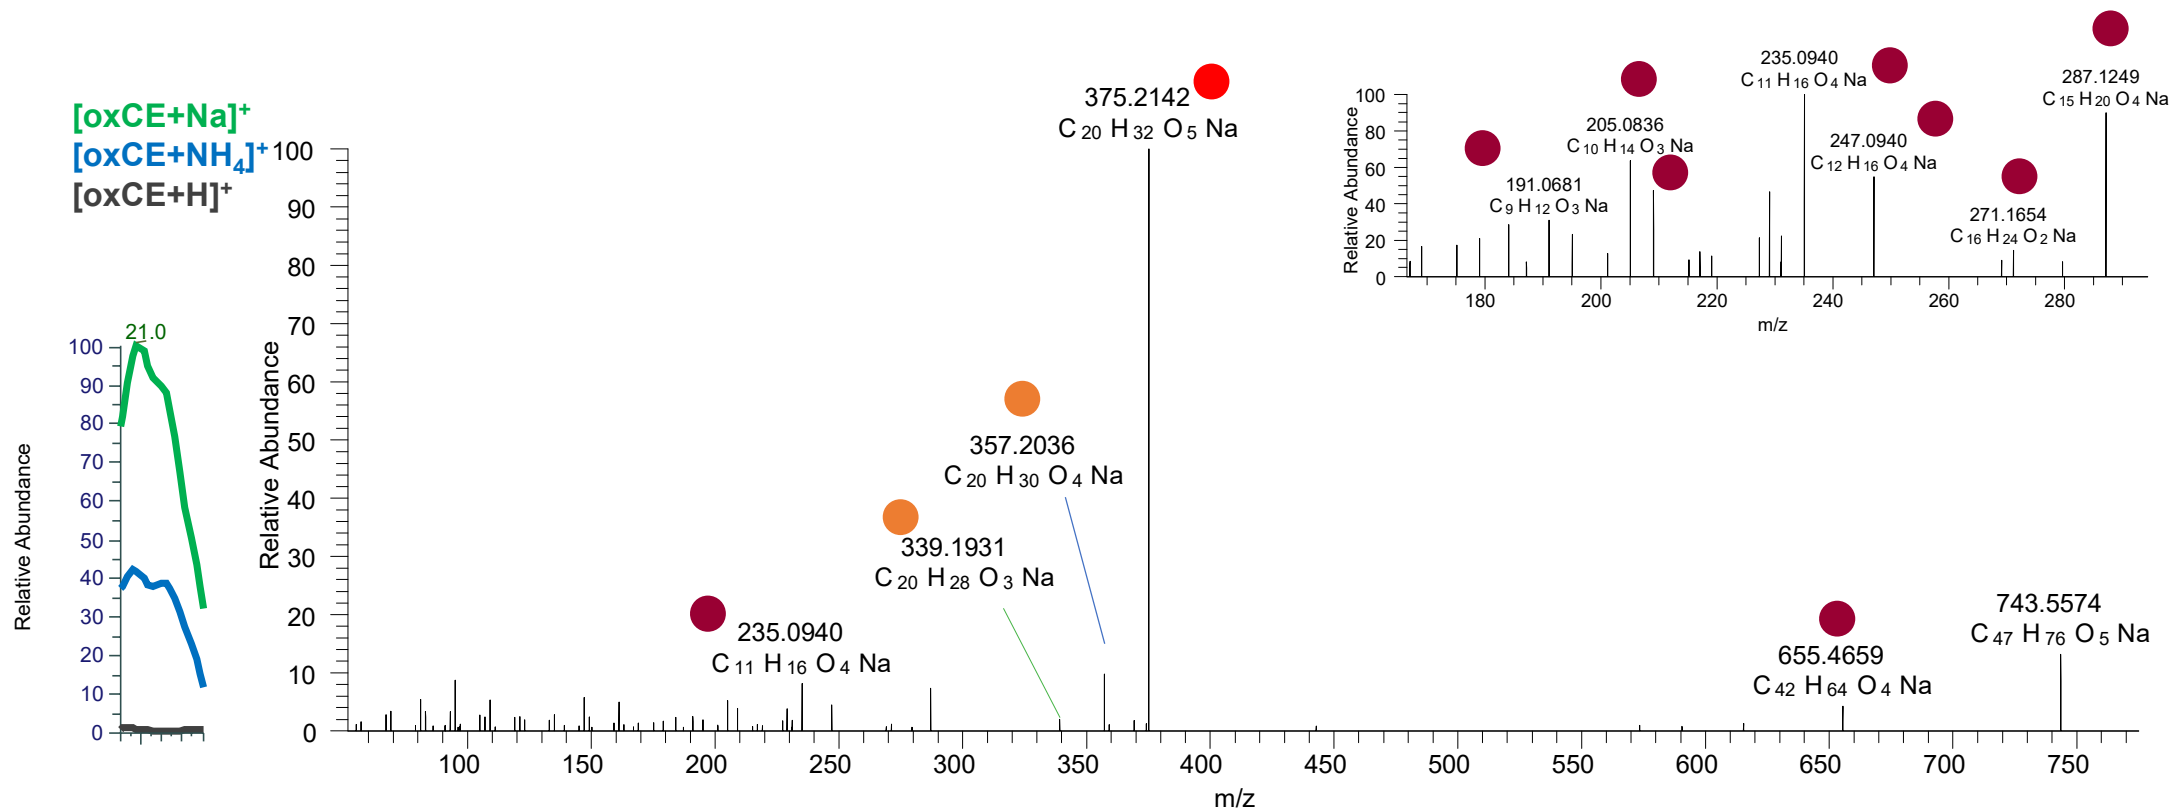

# CE(20:4<2OH,O>) RT 21.5

[oxCE+Na]<sup>+</sup>

XIC 743.5585 NL: 4.29E5

- Fragments containing oxFAs
- Fragments related to water loss
- Fragments not containing oxFAs
- Position-specific fragments
- Fragments related to other oxLPPs

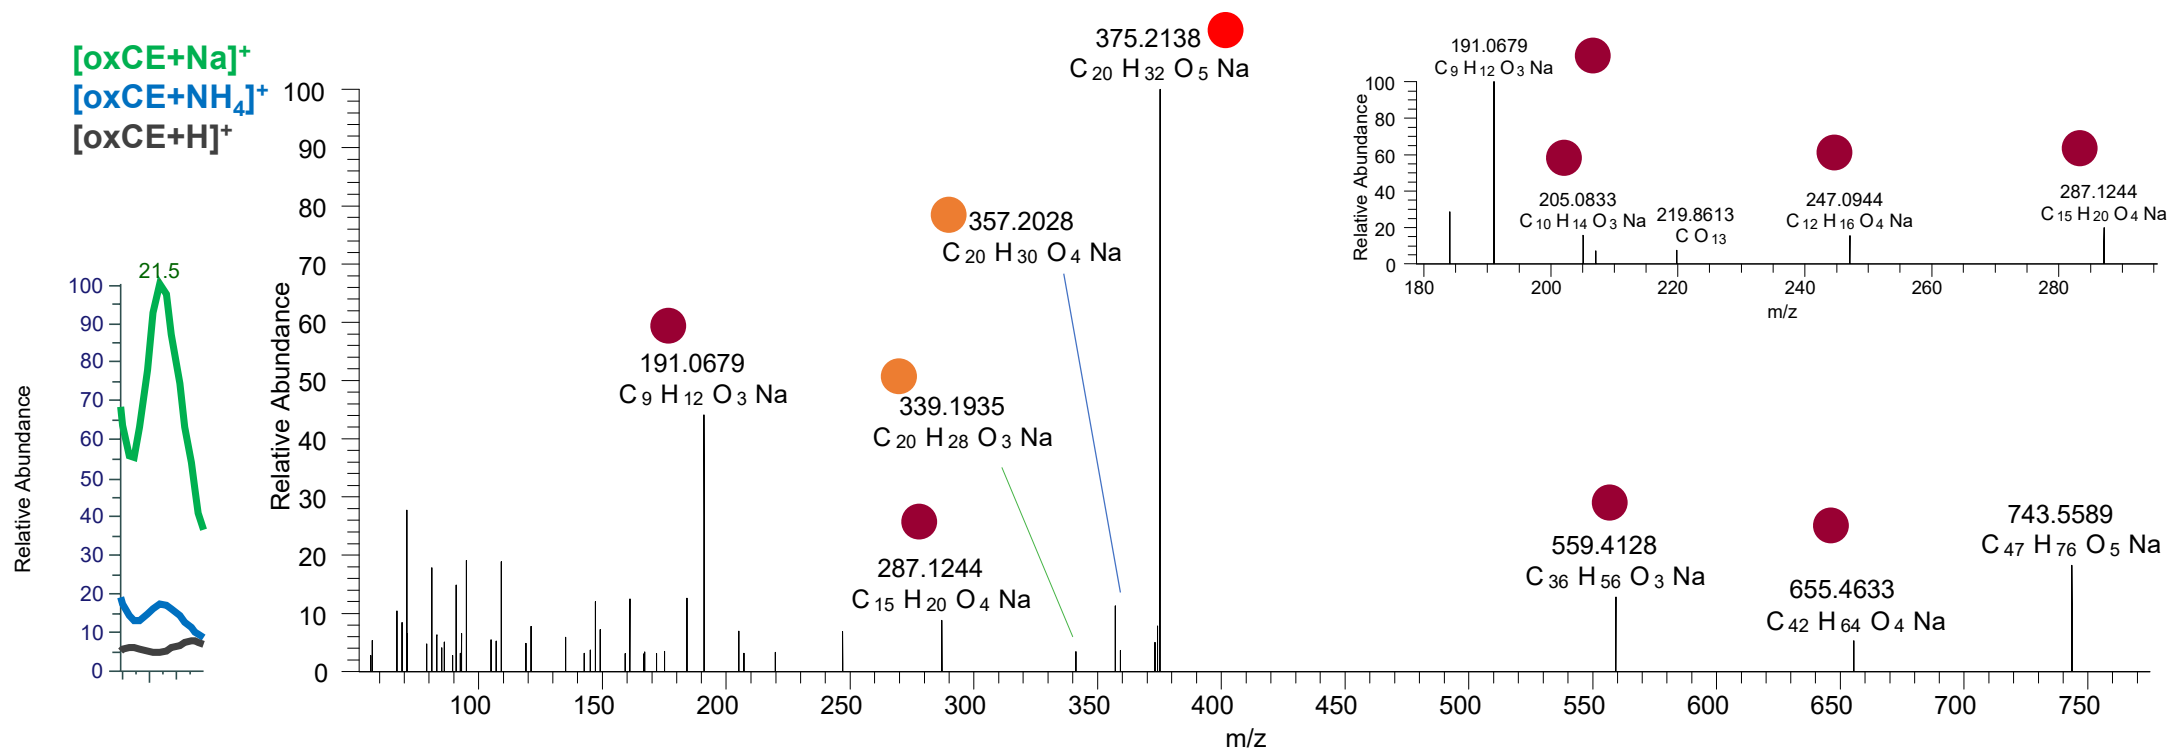

# CE(20:4<OH,2O>) RT 22.1

[oxCE+Na]<sup>+</sup>

XIC 743.5585 NL: 1.49E5

- Fragments containing oxFAs
- Fragments related to water loss
- Fragments not containing oxFAs
- Position-specific fragments
- Fragments related to other oxLPPs

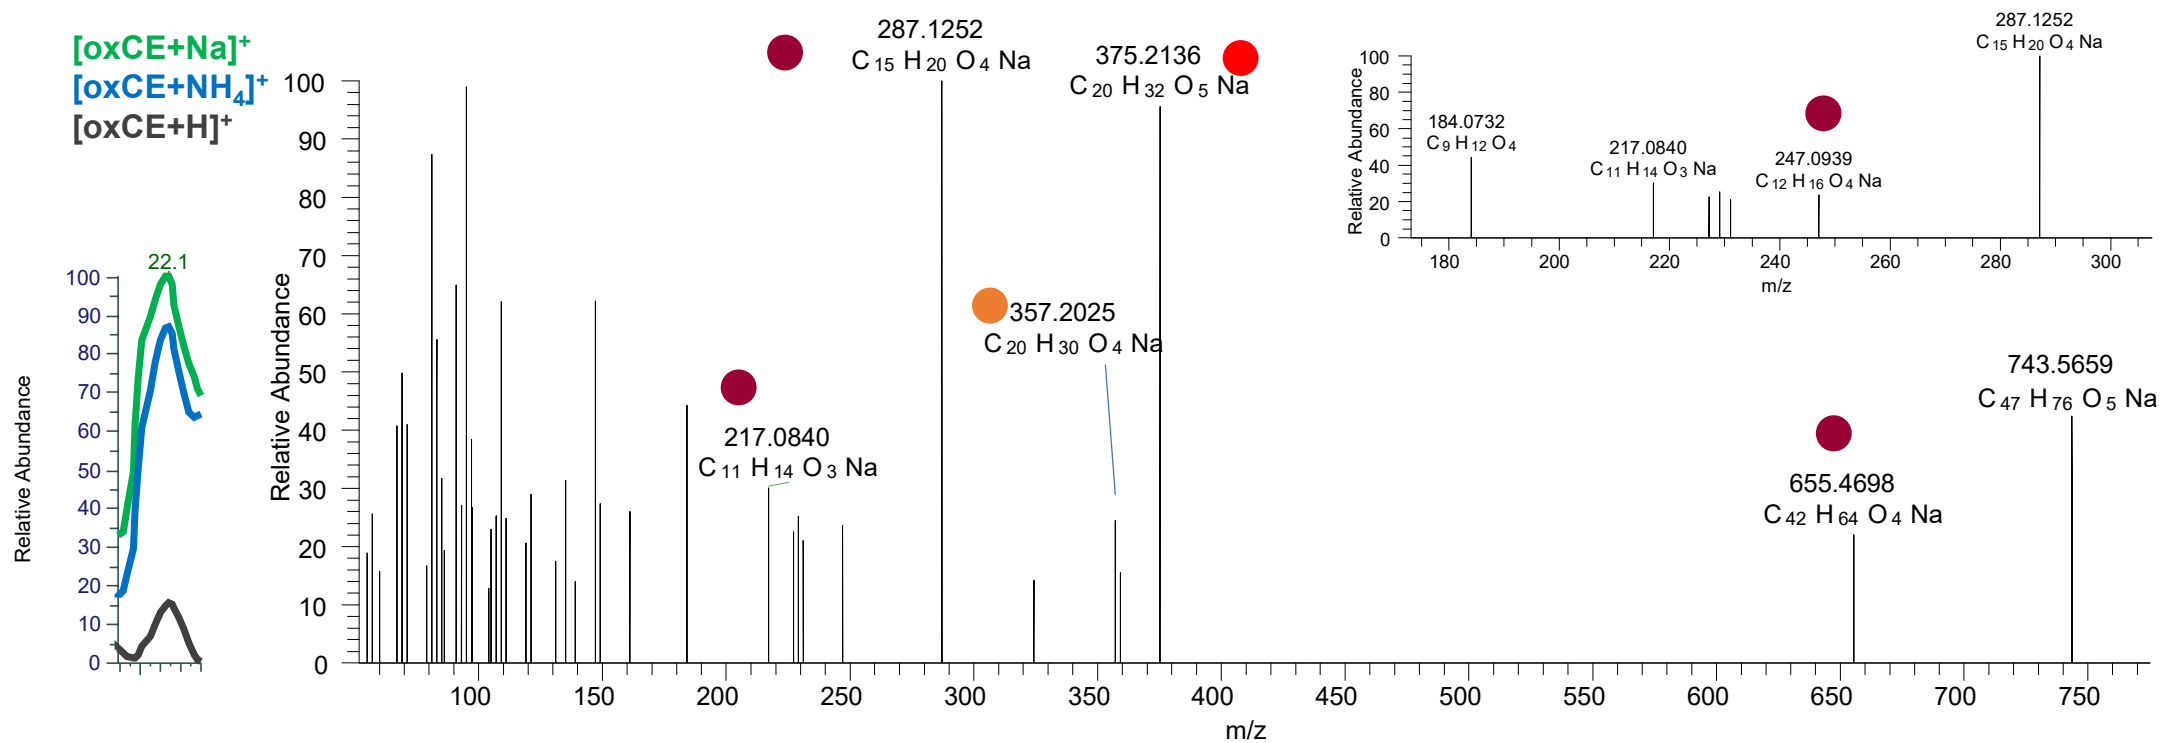



# CE(20:3<OH,ep,O>) RT 20.5

[oxCE+Na]<sup>+</sup>

XIC 745.5741 NL: 5.43E4

- Fragments containing oxFAs
- Fragments related to water loss
- Fragments not containing oxFAs
- Position-specific fragments
- Fragments related to other oxLPPs

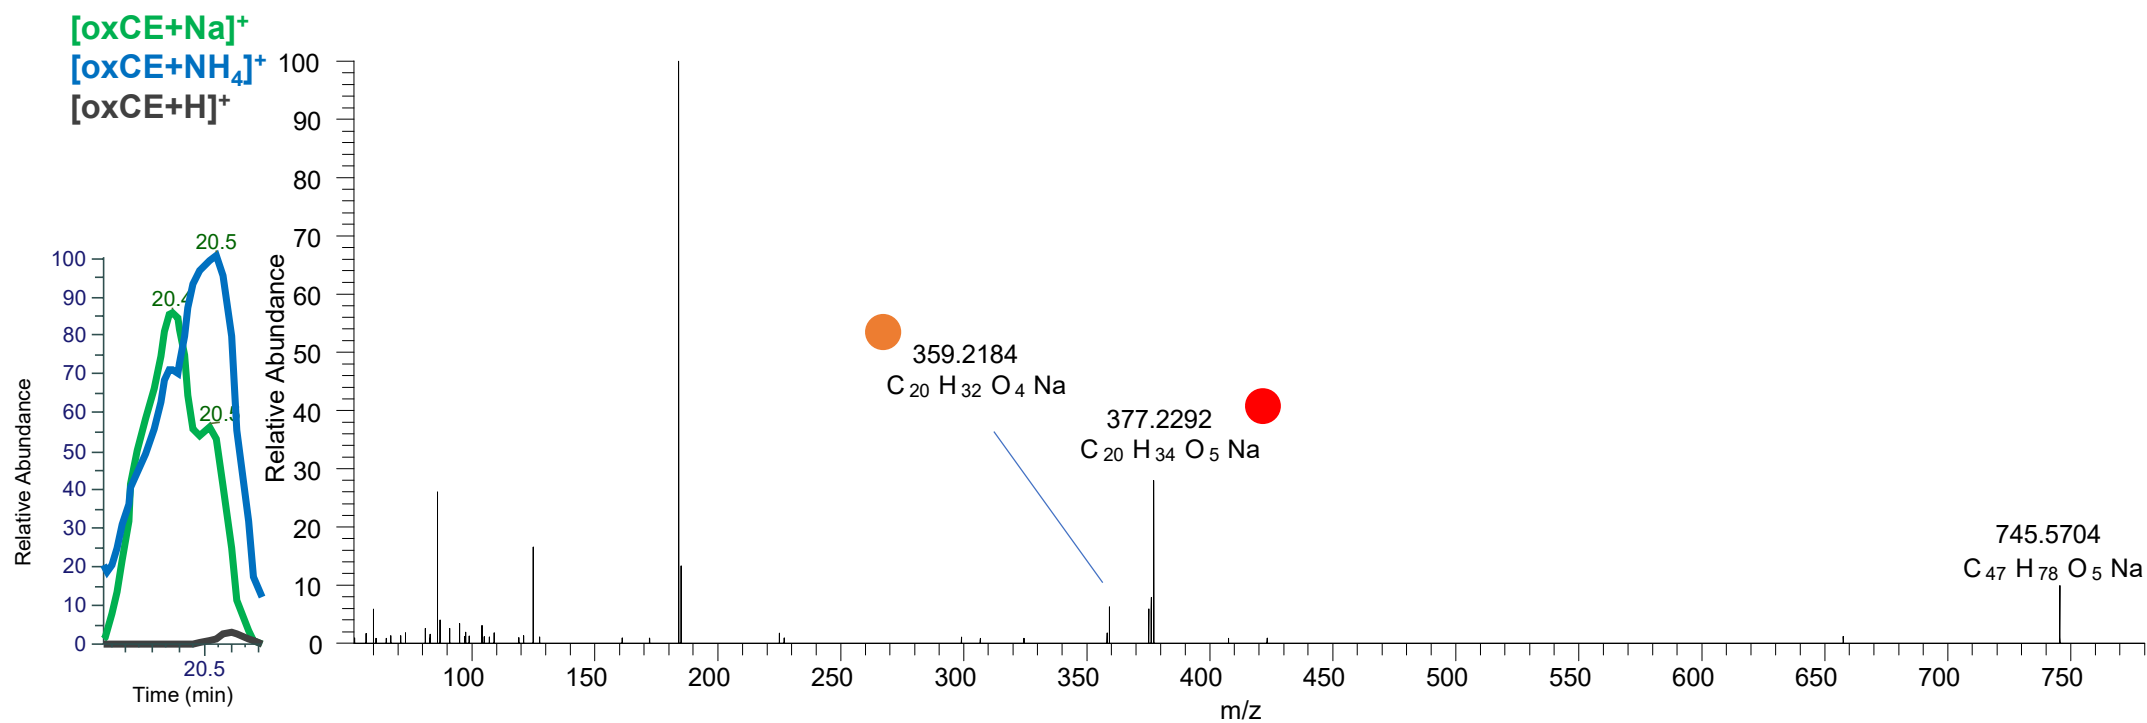

# CE(20:2<ep,OH,O>) RT 21.3

[oxCE+Na]<sup>+</sup>

XIC 745.5741 NL: 8.27E4

- Fragments containing oxFAs
- Fragments related to water loss
- Fragments not containing oxFAs
- Position-specific fragments
- Fragments related to other oxLPPs

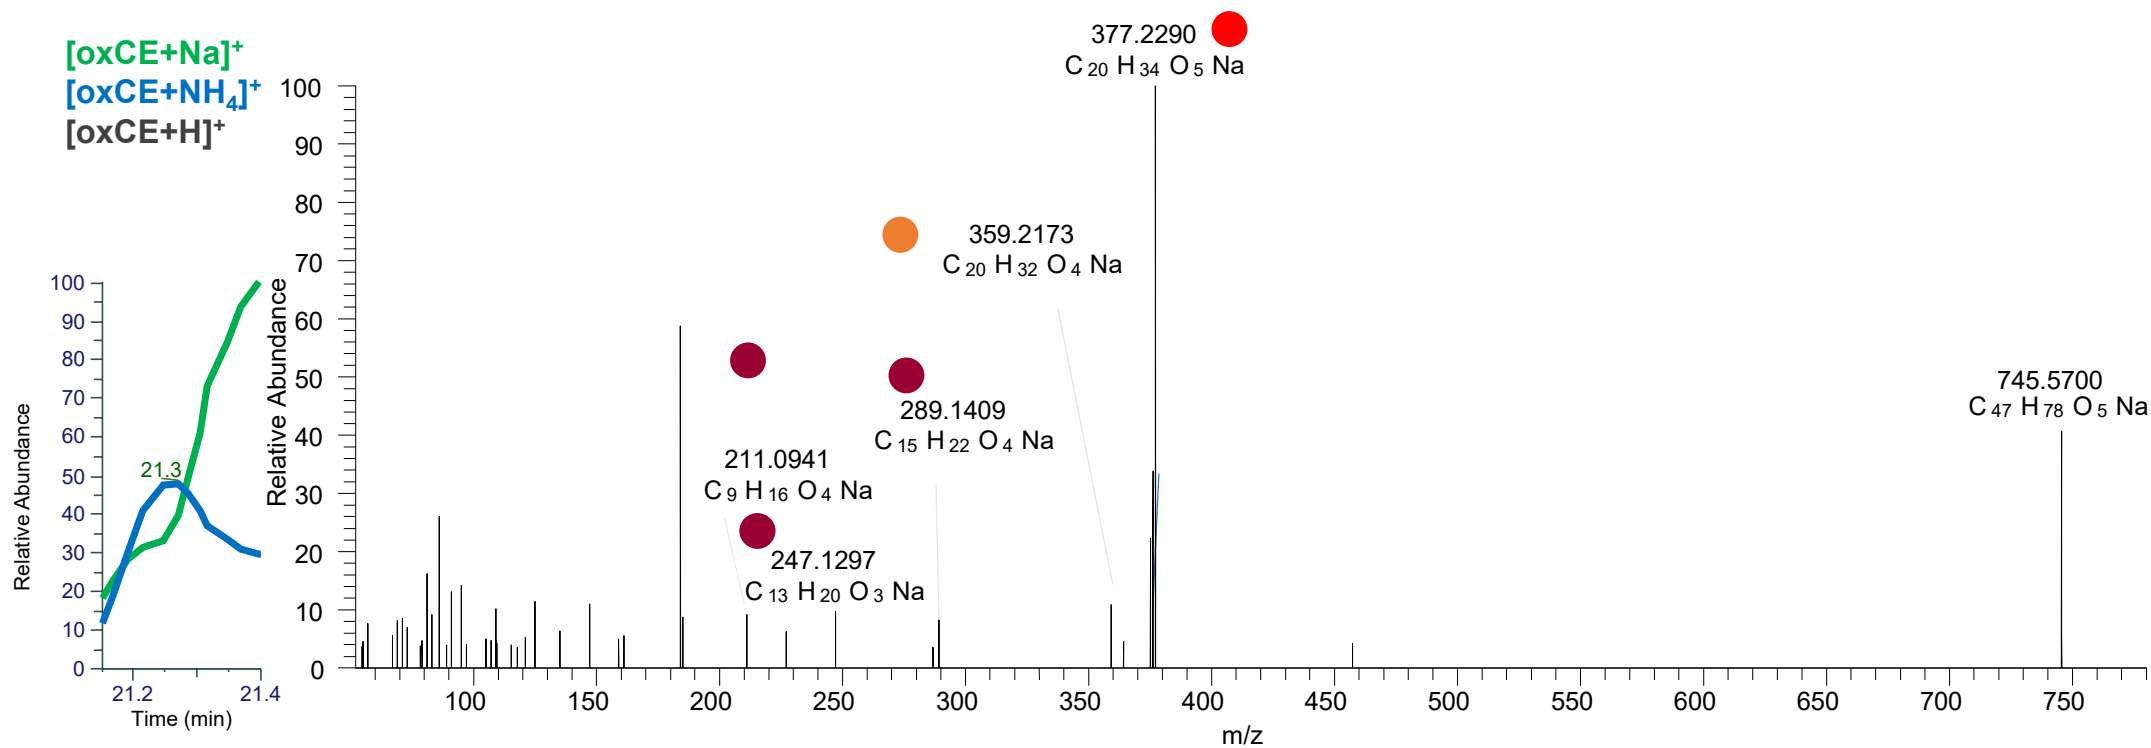

# CE(22:6<2OH>) RT 20.6

[oxCE+Na]<sup>+</sup>

XIC 751.5636 NL: 1.65E5

- Fragments containing oxFAs
- Fragments related to water loss
- Fragments not containing oxFAs
- Position-specific fragments
- Fragments related to other oxLPPs

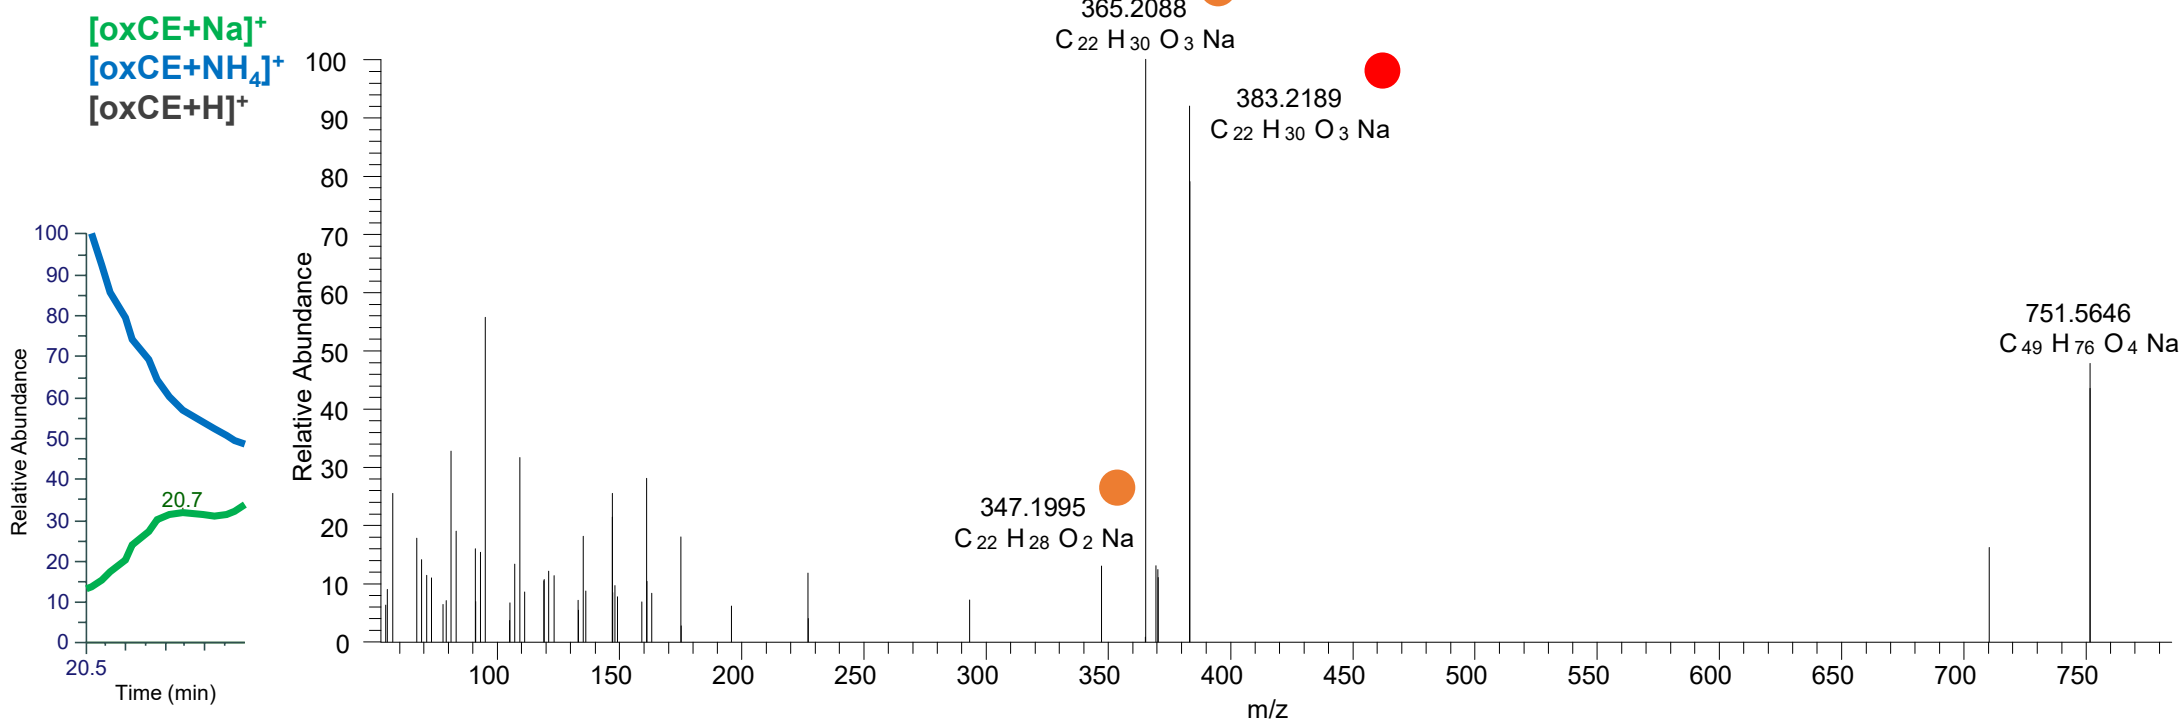

# CE(22:4<OH,ep>) RT 21.6-21.9

[oxCE+Na]<sup>+</sup>

XIC 753.5792 NL: 2.76E4

- Fragments containing oxFAs
- Fragments related to water loss
- Fragments not containing oxFAs
- Position-specific fragments
- Fragments related to other oxLPPs

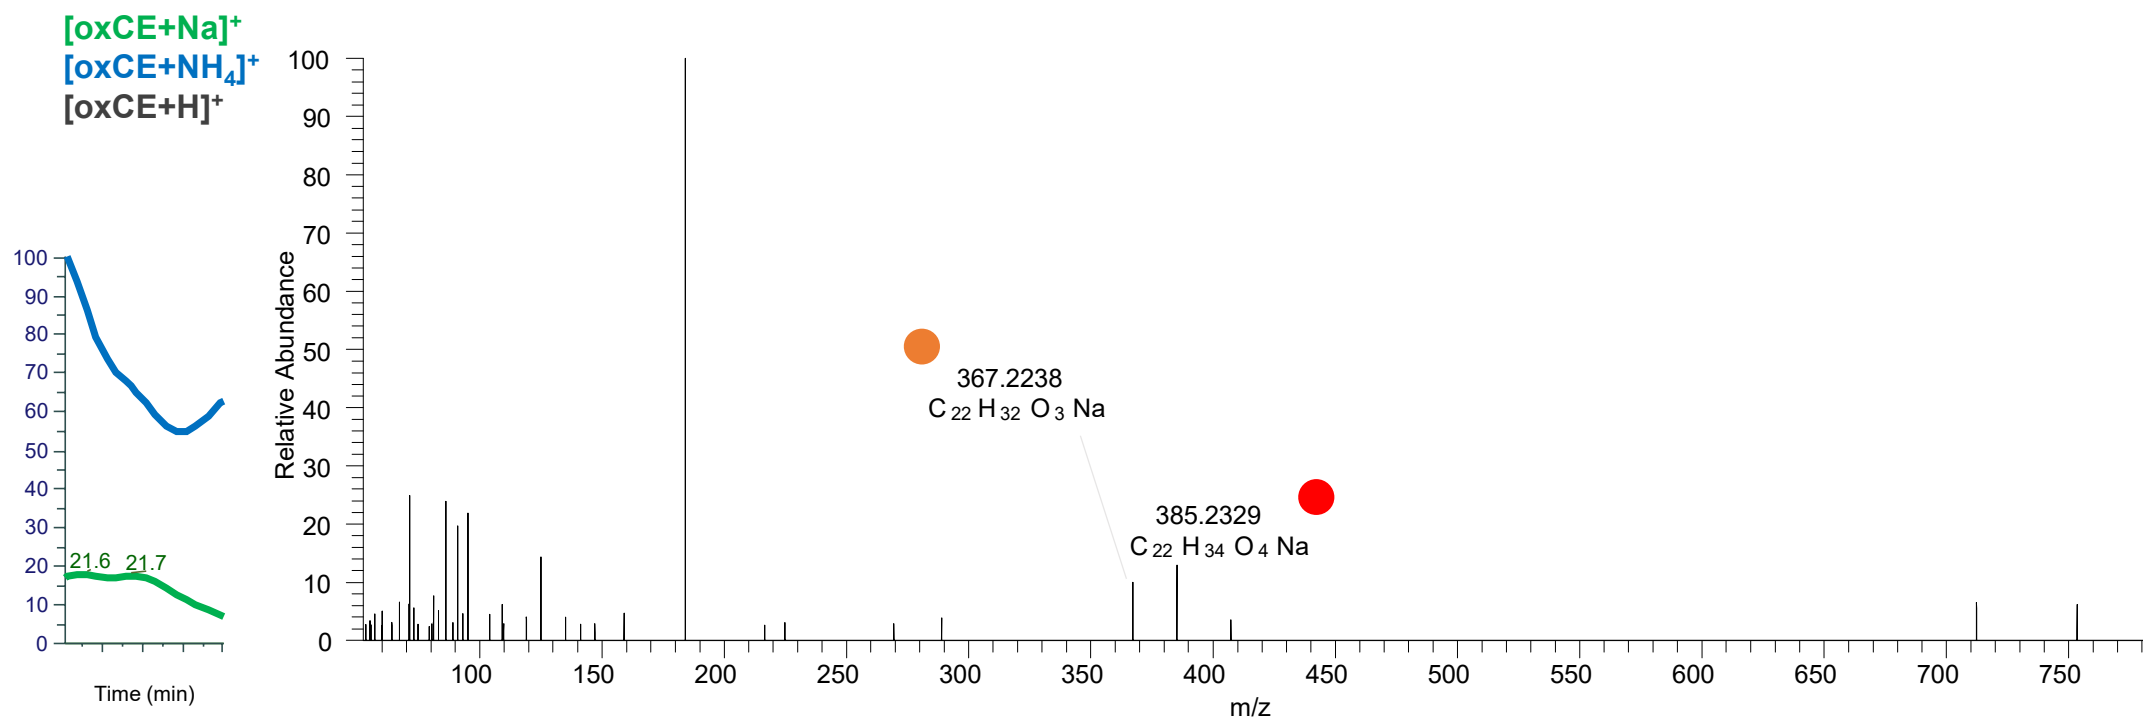

# CE(22:6<2OH,O>)

RT 18.6

[oxCE+Na]<sup>+</sup>

XIC 767.5585 NL: 7.32E4

- Fragments containing oxFAs
- Fragments related to water loss
- Fragments not containing oxFAs
- Position-specific fragments
- Fragments related to other oxLPPs

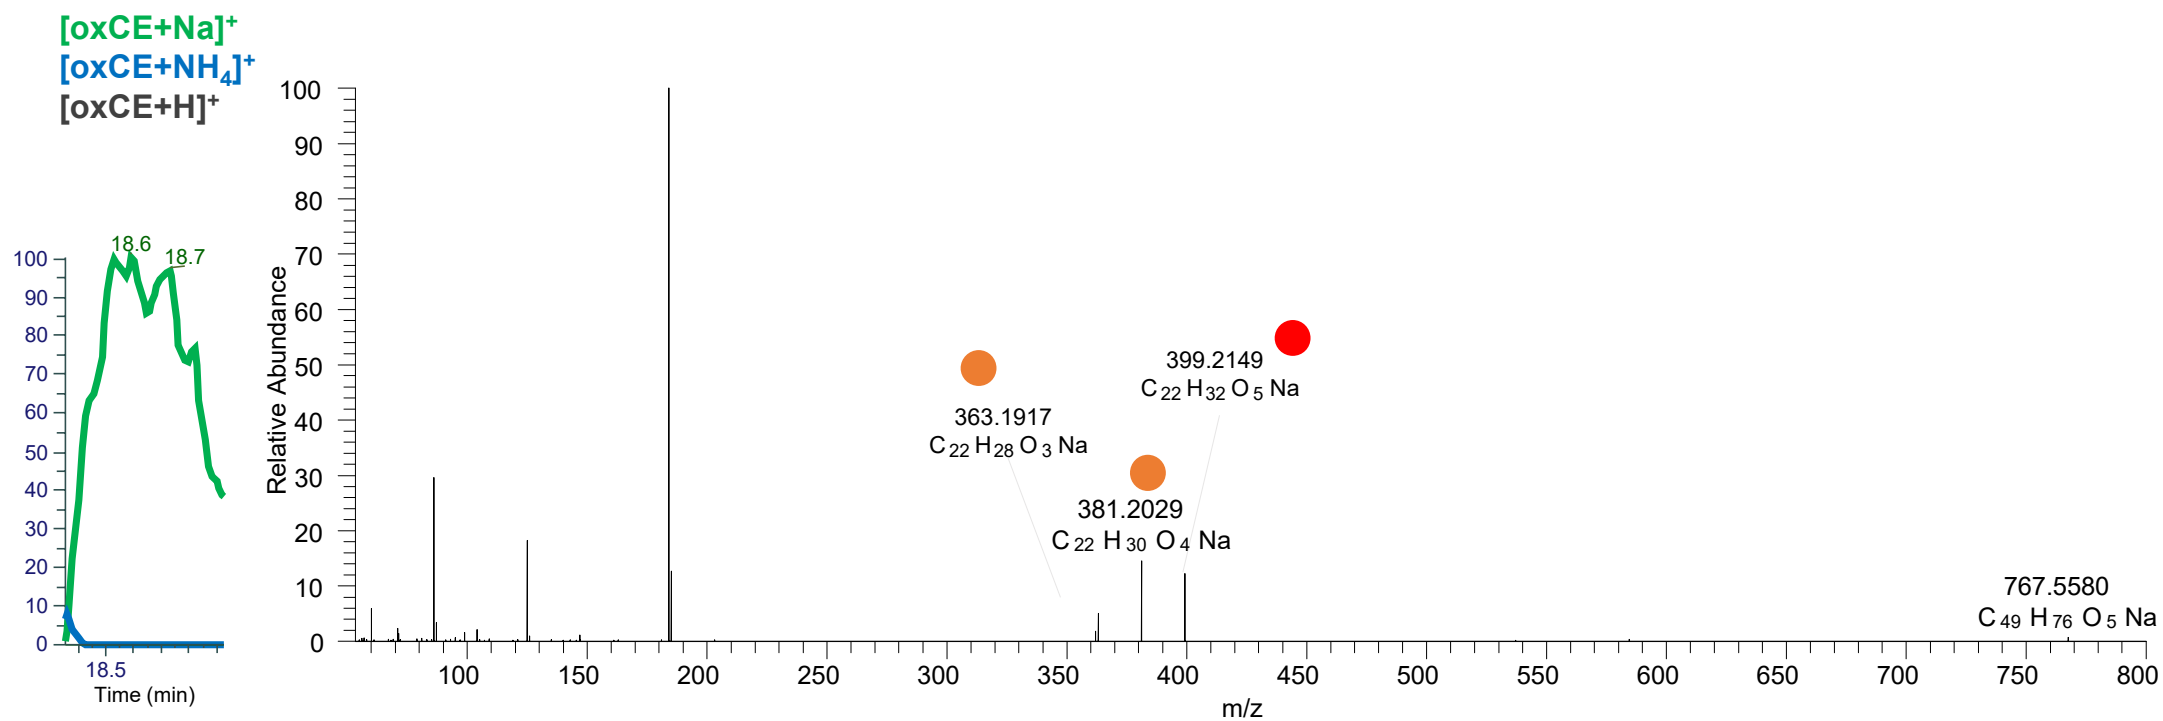

# CE(22:6<OH,2O>) RT 19.4

[oxCE+Na]<sup>+</sup>

XIC 767.5585 NL: 4.73E4

- Fragments containing oxFAs
- Fragments related to water loss
- Fragments not containing oxFAs
- Position-specific fragments
- Fragments related to other oxLPPs

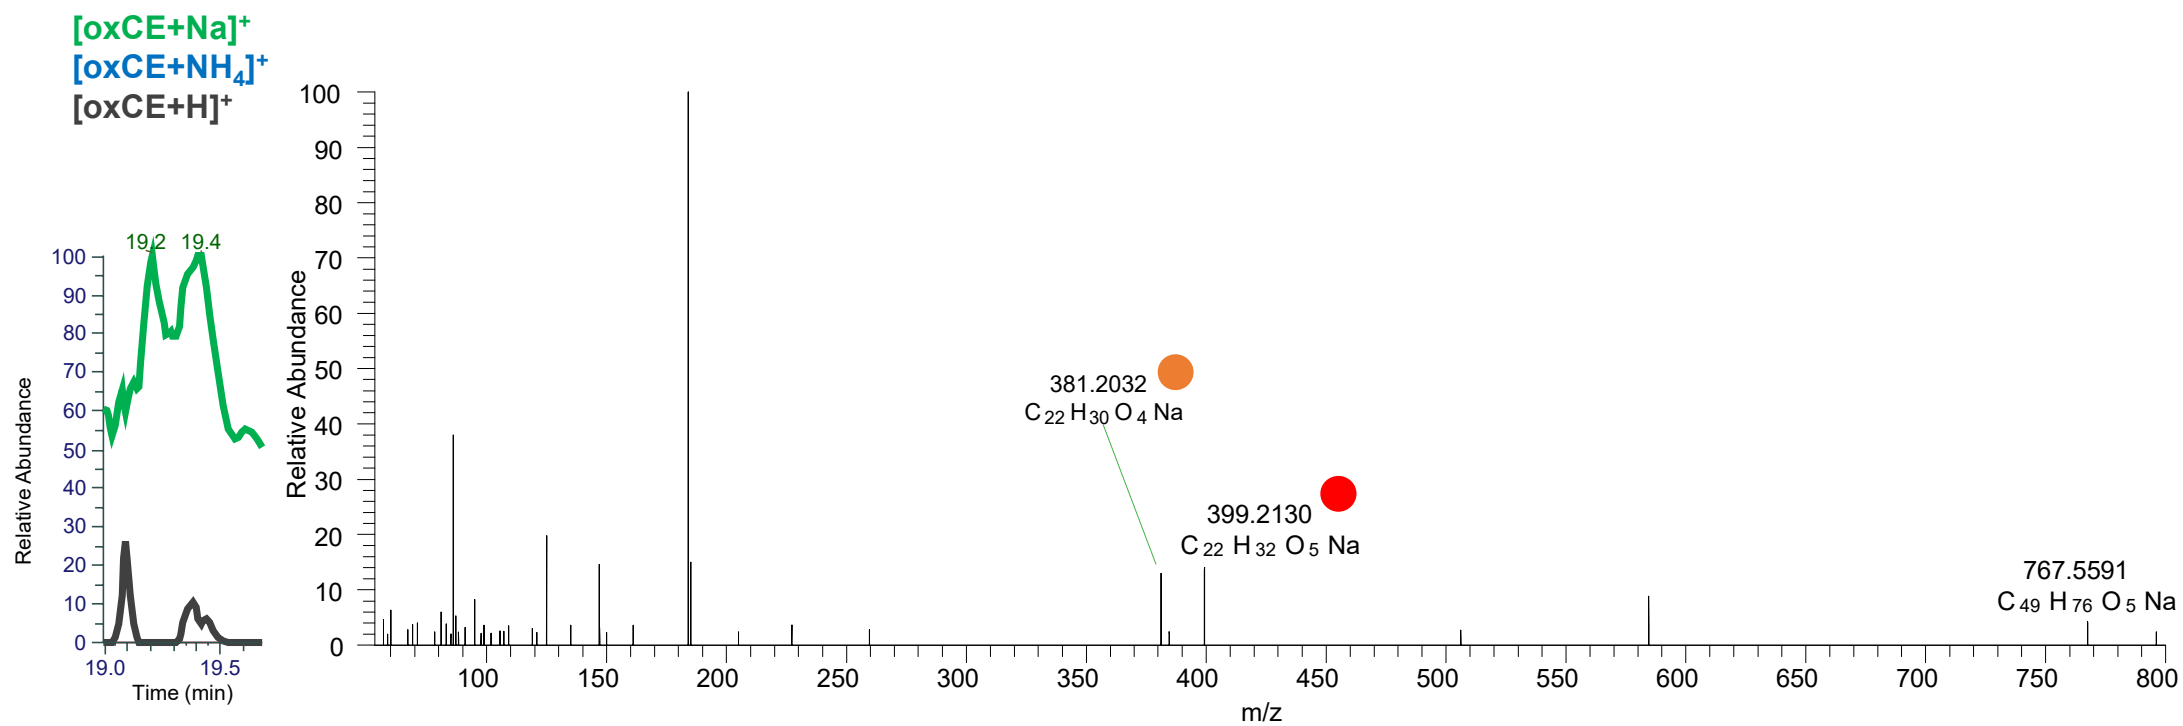

# CE(22:5<3O>) RT 21.8

[oxCE+Na]<sup>+</sup>

XIC 769.5741 NL: 7.38E3

- Fragments containing oxFAs
- Fragments related to water loss
- Fragments not containing oxFAs
- Position-specific fragments
- Fragments related to other oxLPPs

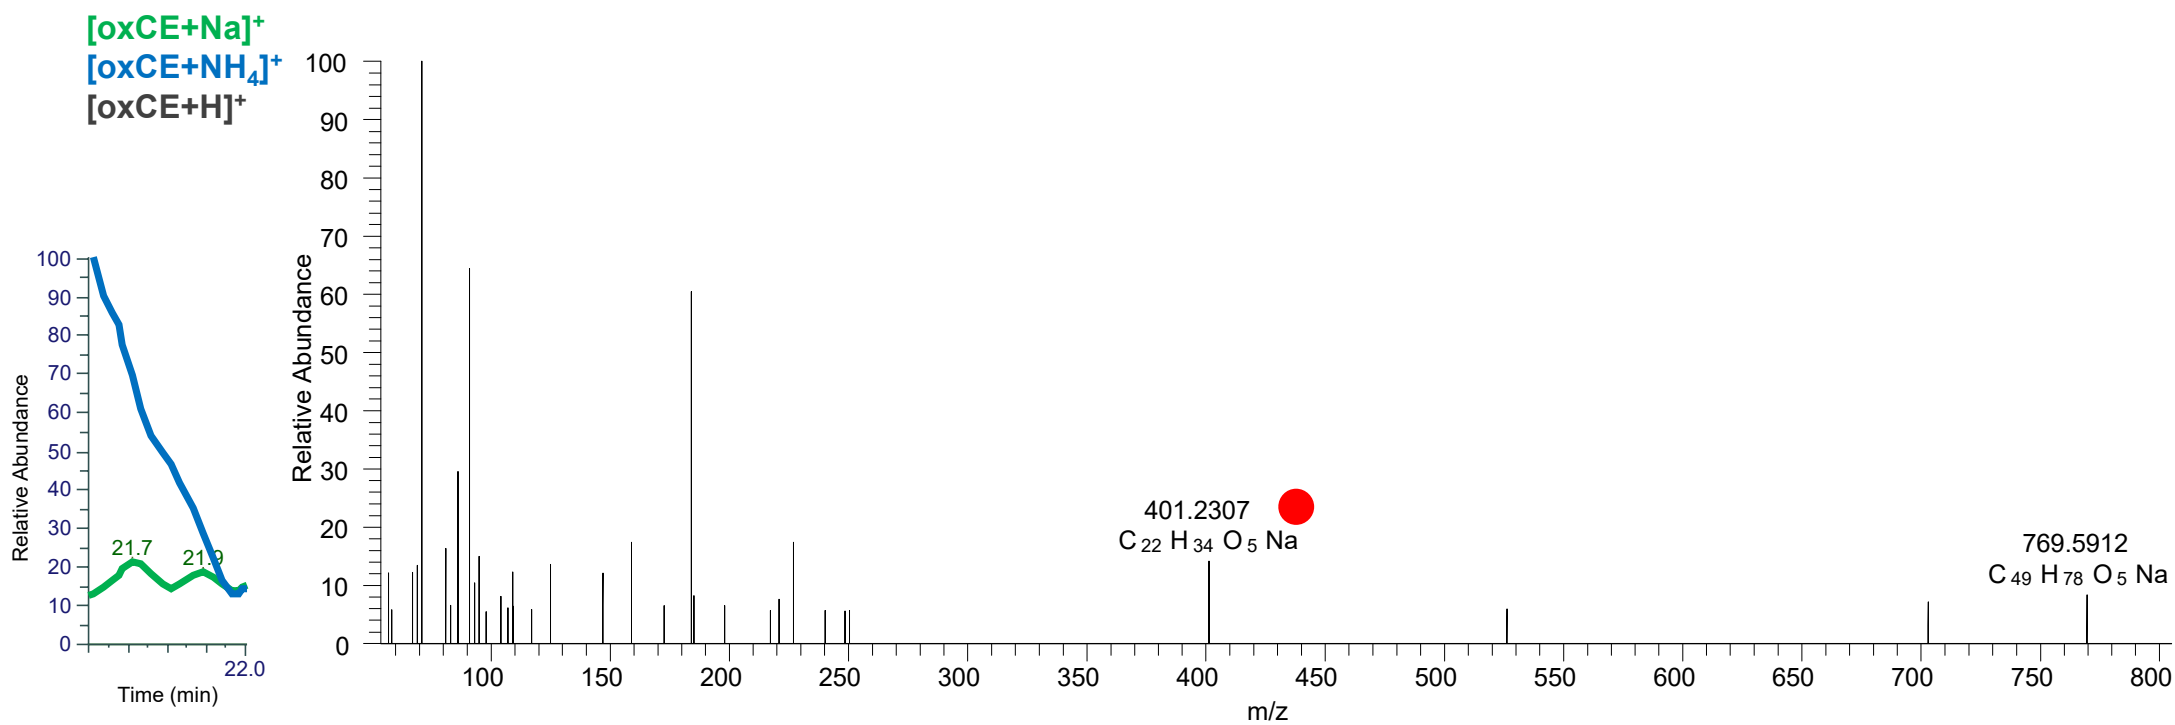

Supplement: 41467_2022_33225_MOESM10_ESM.pdf [file 41467_2022_33225_MOESM10_ESM.pdf]
