# Supplementary material for: Analytical and computational workflow for in-depth analysis of oxidized complex lipids in blood plasma
Source: PubMed Central journal article supplement (PMC9626469; doi:10.1038/s41467-022-33225-9), 2022-11-01

## Supplementary File 8.

MS2 spectra acquired using stDDA and used for the annotation of **oxidized TG** (oxTG) species in group pooled blood plasma samples of obese non-diabetic (OND) and obese with type 2 diabetes (OT2D) individuals. Structure-related fragmentation ions are colour-coded according to the legend provided. Annotated lipids for each group pool are sorted by their precursor  $m/z$ .

OND\_pool

# TG(16:1\_18:1\_16:0<OH>)

RT 23.5

[oxTG+Na]<sup>+</sup>

XIC 869.7205 NL: 2.66E5

- Fragments containing oxFAs
- Fragments related to water loss
- Fragments not containing oxFAs
- Fragments related to other oxLPPs
- Position-specific fragments
- Fragments related to FA loss
- Fragments related to oxFA loss

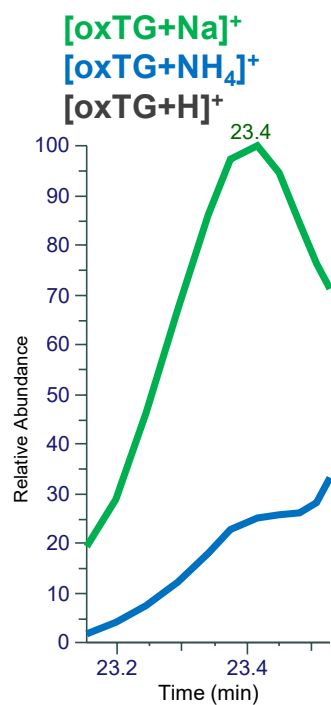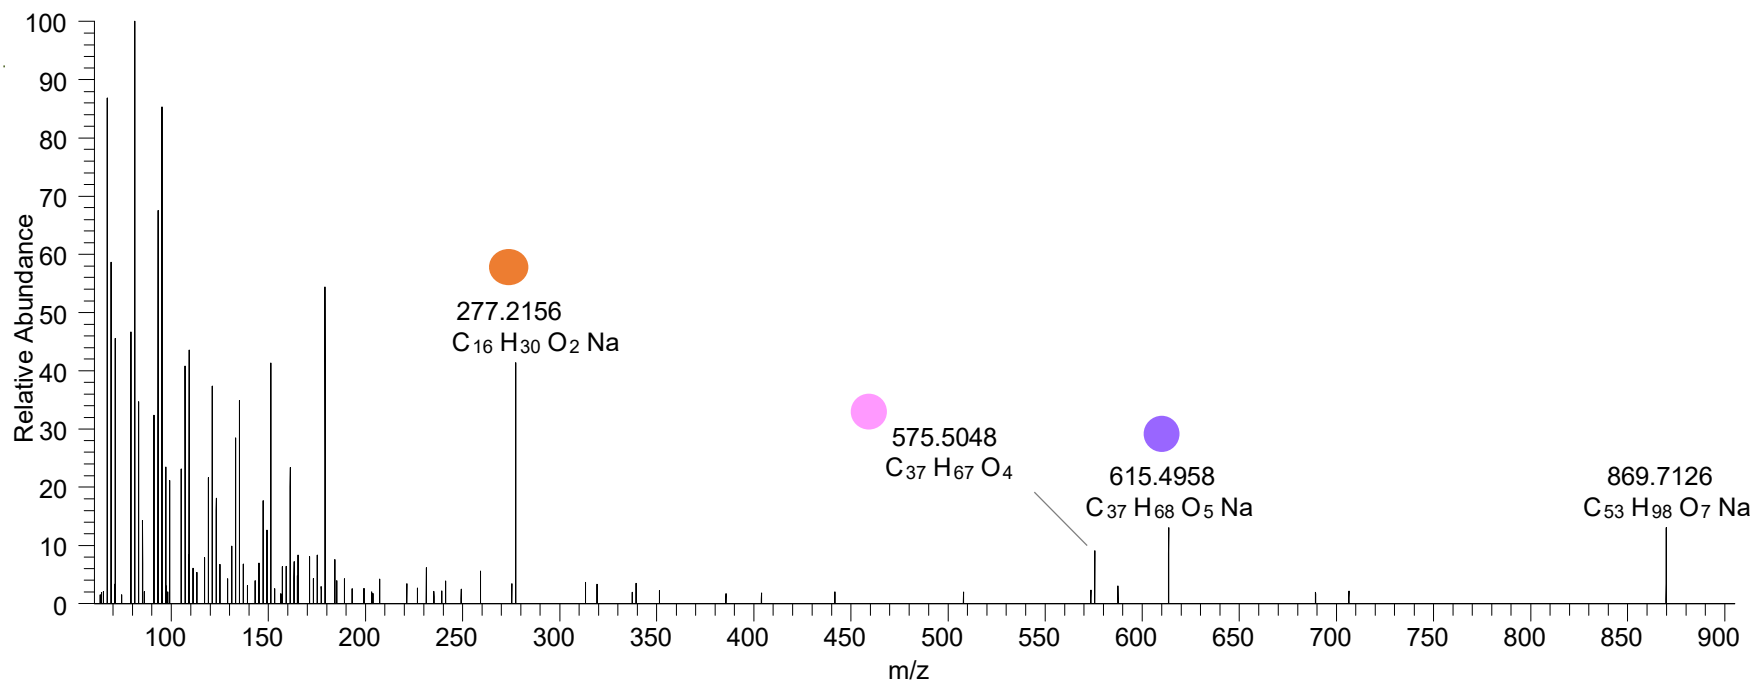

# TG(16:0\_16:0\_18:2<OH>)

RT 23.7

[oxTG+Na]<sup>+</sup>

XIC 869.7205 NL: 2.66E5

- Fragments containing oxFAs
- Fragments related to water loss
- Fragments not containing oxFAs
- Fragments related to other oxLPPs
- Position-specific fragments
- Fragments related to FA loss
- Fragments related to oxFA loss

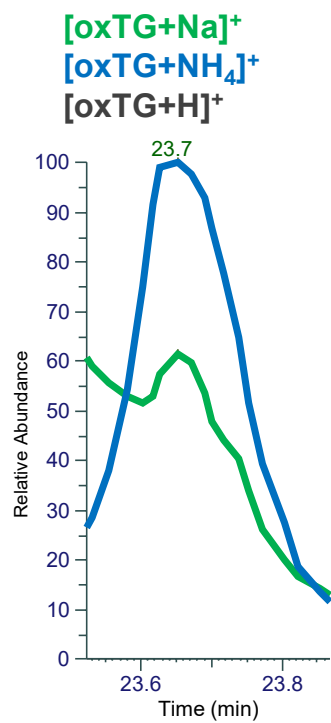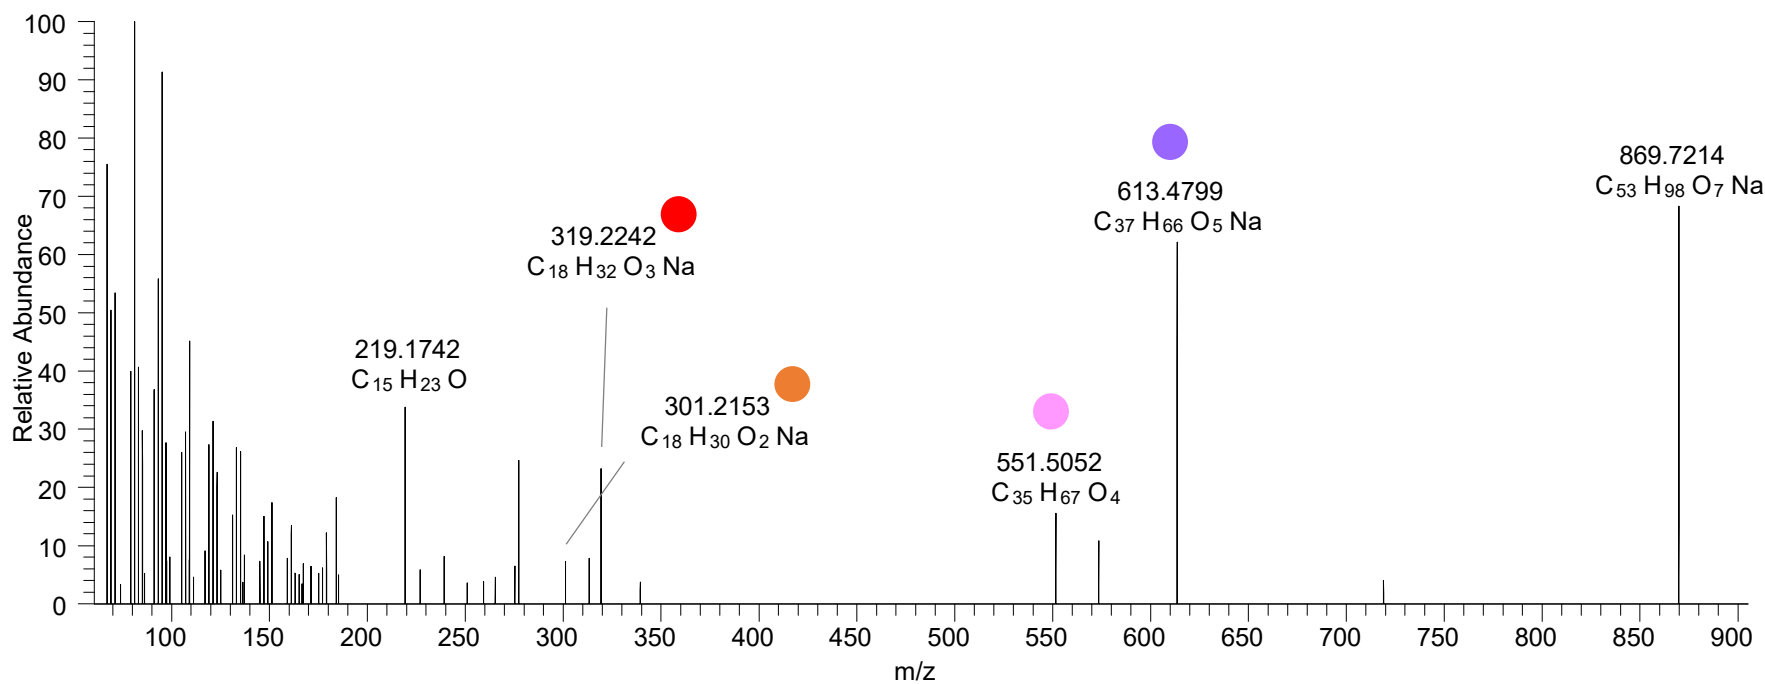

# TG(16:0\_18:1\_16:0<ep>)

RT 24.1

[oxTG+Na]<sup>+</sup>

XIC 869.7205 NL: 5.49E4

- Fragments containing oxFAs
- Fragments related to water loss
- Fragments not containing oxFAs
- Fragments related to other oxLPPs
- Position-specific fragments
- Fragments related to FA loss
- Fragments related to oxFA loss

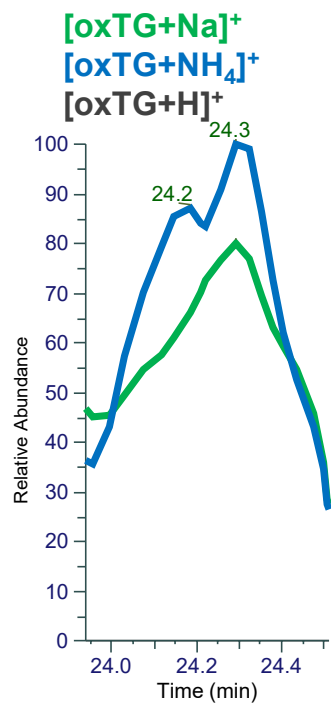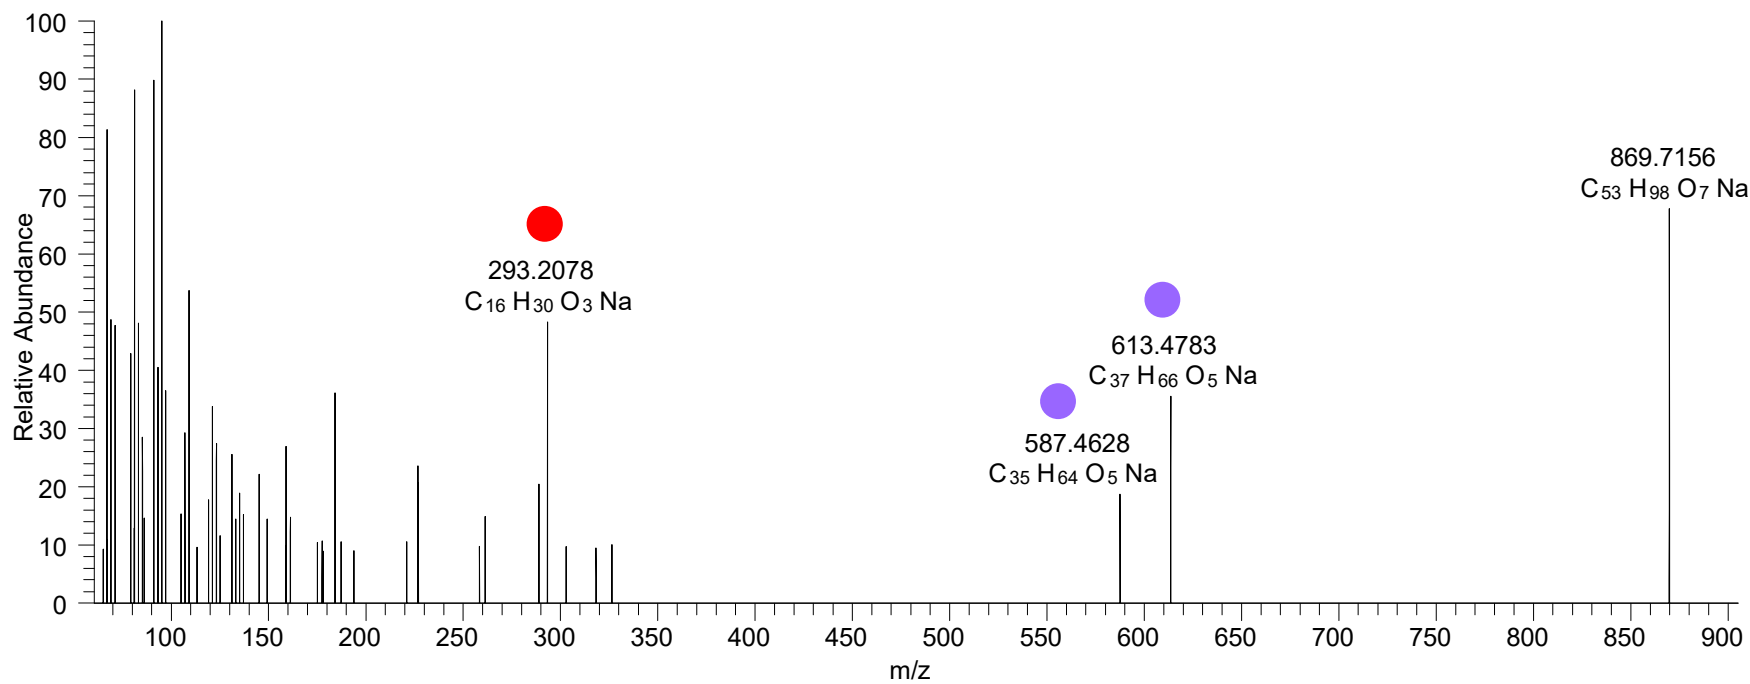

TG(16:0\_18:1\_16:0<ep>)  
TG(16:0\_16:0\_18:1<ep>)  
RT 24.3-24.4

[oxTG+Na]<sup>+</sup>

XIC 869.7205 NL: 5.49E4

- Fragments containing oxFAs
- Fragments related to water loss
- Fragments not containing oxFAs
- Fragments related to other oxLPPs
- Position-specific fragments
- Fragments related to FA loss
- Fragments related to oxFA loss

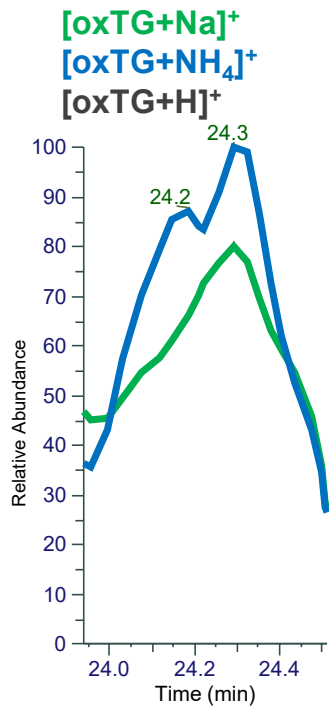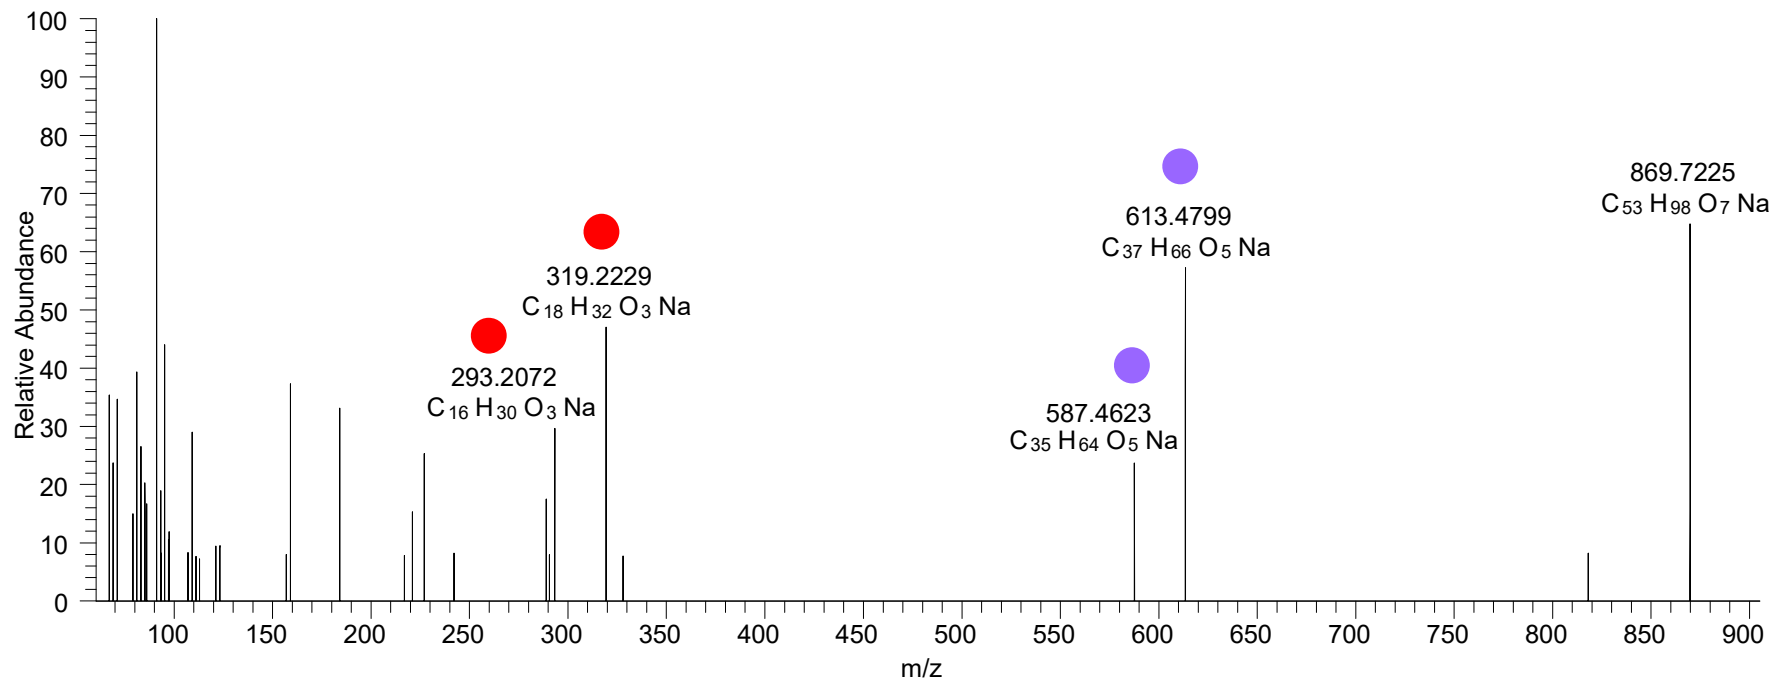

TG(16:0\_18:2\_18:2<OH>)  
TG(16:1\_18:1\_18:2<OH>)  
RT 23.0-23.2

[oxTG+Na]<sup>+</sup>

XIC 893.7204 NL: 2.22E6

- Fragments containing oxFAs
- Fragments related to water loss
- Fragments not containing oxFAs
- Fragments related to other oxLPPs
- Position-specific fragments
- Fragments related to FA loss
- Fragments related to oxFA loss

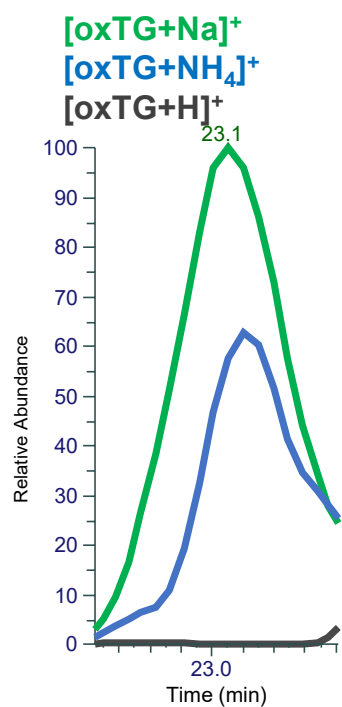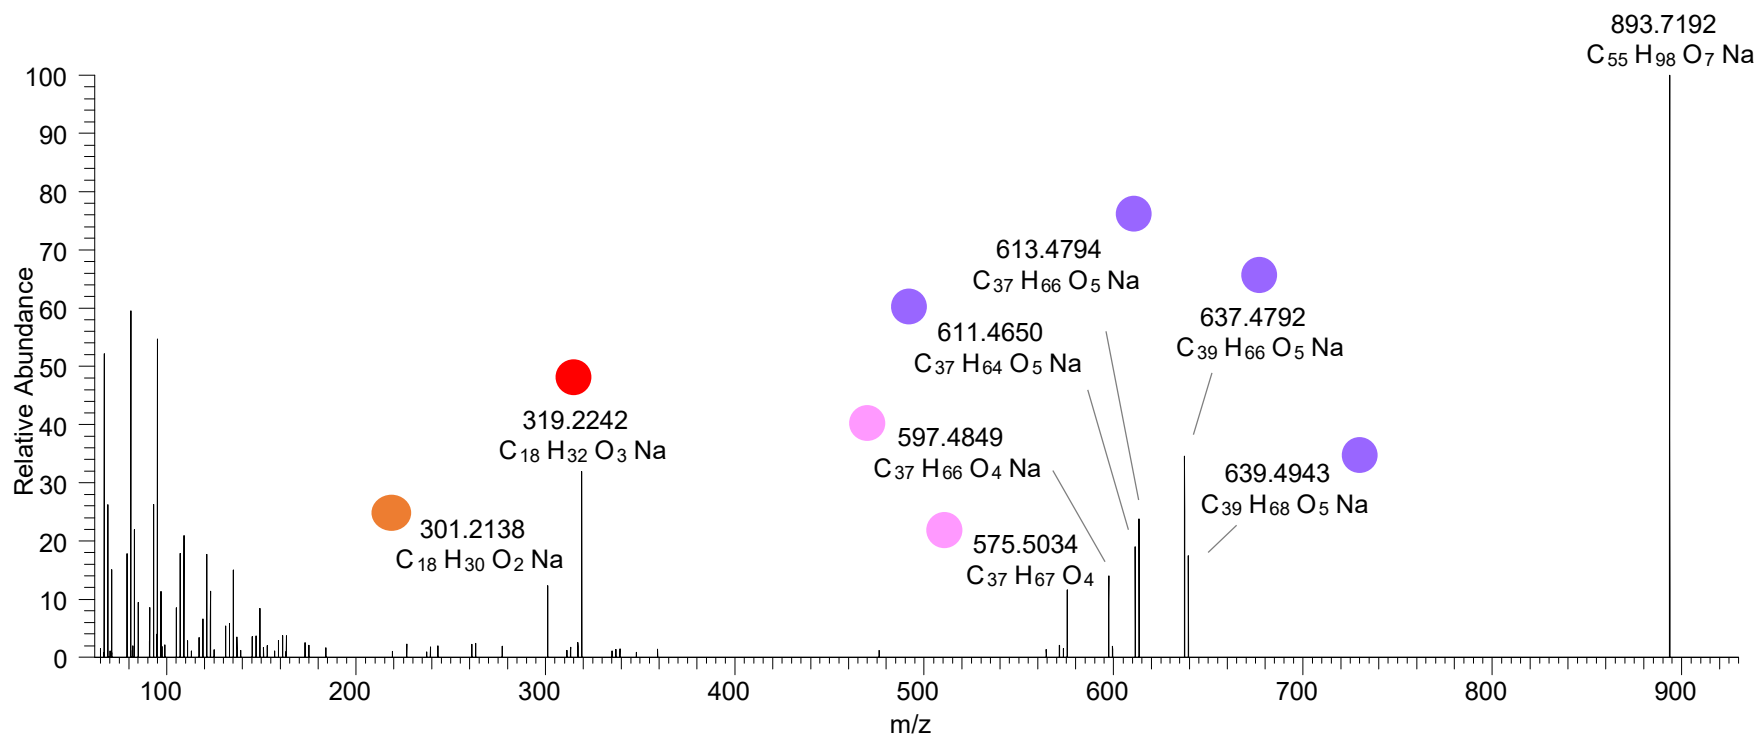

# TG(16:0\_18:1\_18:3<OH>)

RT 23.4

[oxTG+Na]<sup>+</sup>

XIC 893.7204 NL: 2.22E6

- Fragments containing oxFAs
- Fragments related to water loss
- Fragments not containing oxFAs
- Fragments related to other oxLPPs
- Position-specific fragments
- Fragments related to FA loss
- Fragments related to oxFA loss

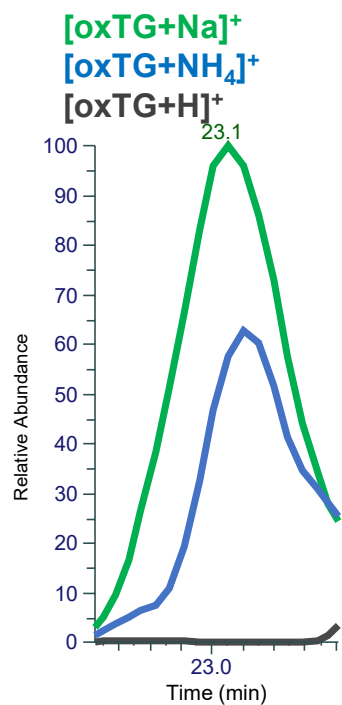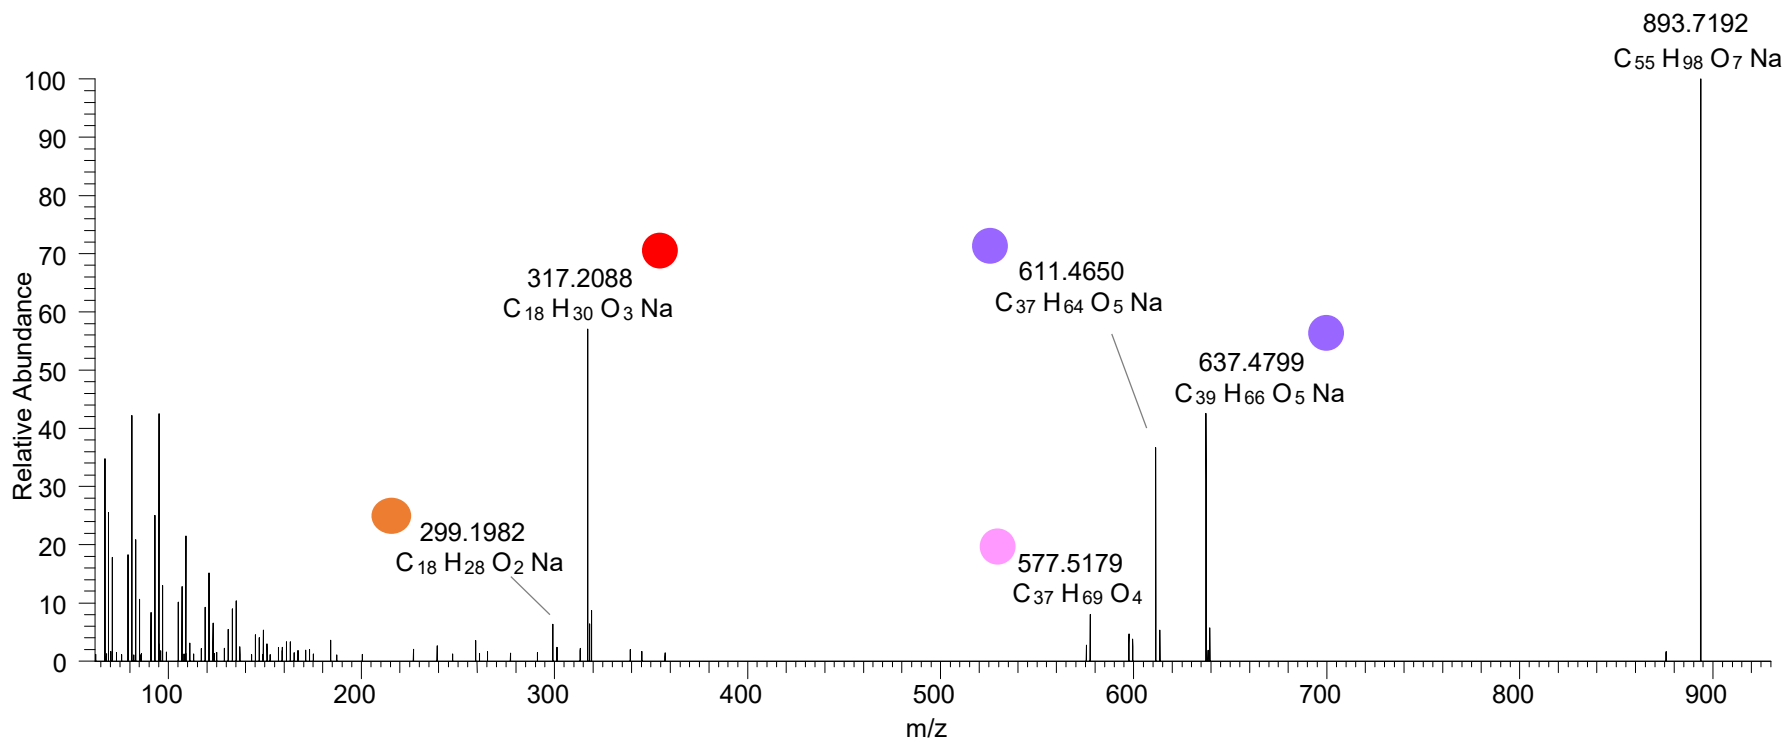



# TG(16:0\_18:1\_18:2<oxo>)

RT 24.0

[oxTG+Na]<sup>+</sup>

XIC 893.7204 NL: 5.72E5

- Fragments containing oxFAs
- Fragments related to water loss
- Fragments not containing oxFAs
- Fragments related to other oxLPPs
- Position-specific fragments
- Fragments related to FA loss
- Fragments related to oxFA loss

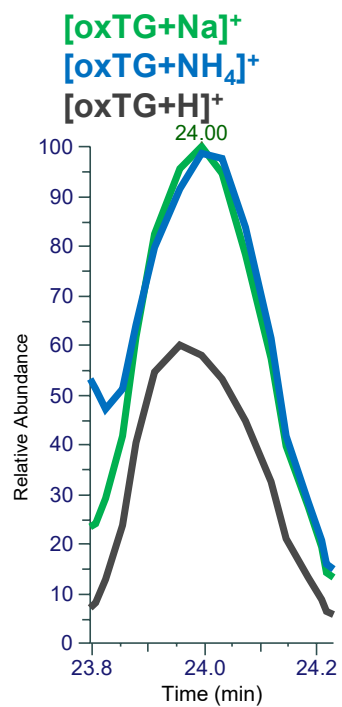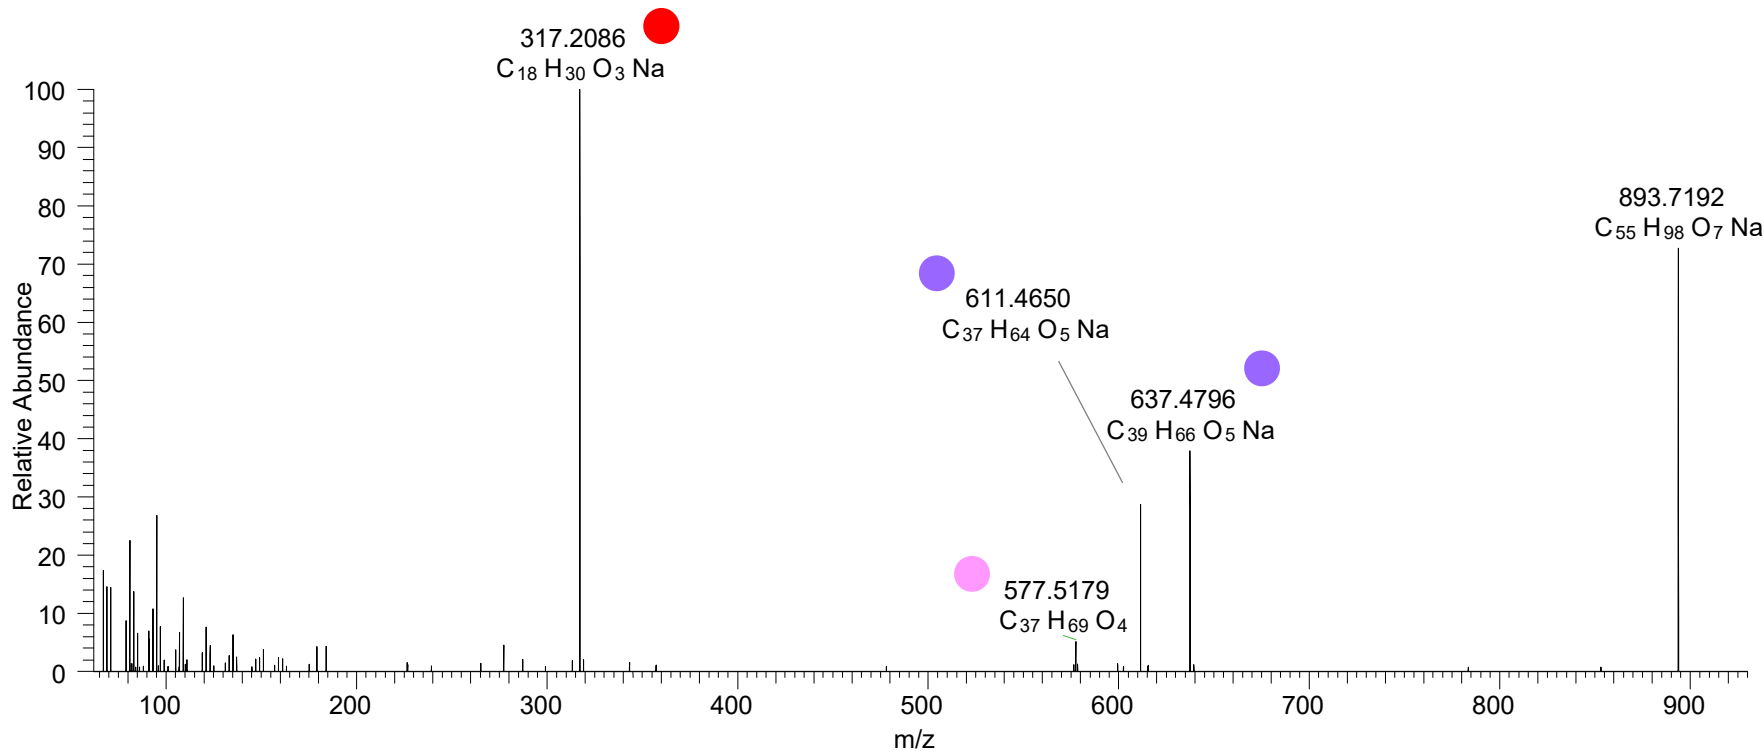

TG(16:0\_18:1\_18:2<oxo>)  
TG(16:0\_18:0\_18:3<oxo>)  
RT 24.8

[oxTG+Na]<sup>+</sup>

XIC 893.7204 NL: 3.52E4

- Fragments containing oxFAs
- Fragments related to water loss
- Fragments not containing oxFAs
- Fragments related to other oxLPPs
- Position-specific fragments
- Fragments related to FA loss
- Fragments related to oxFA loss

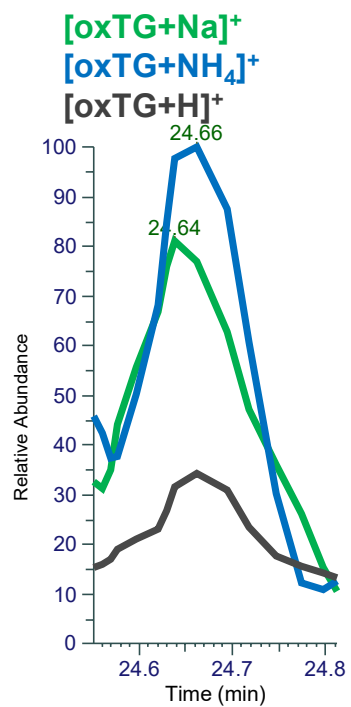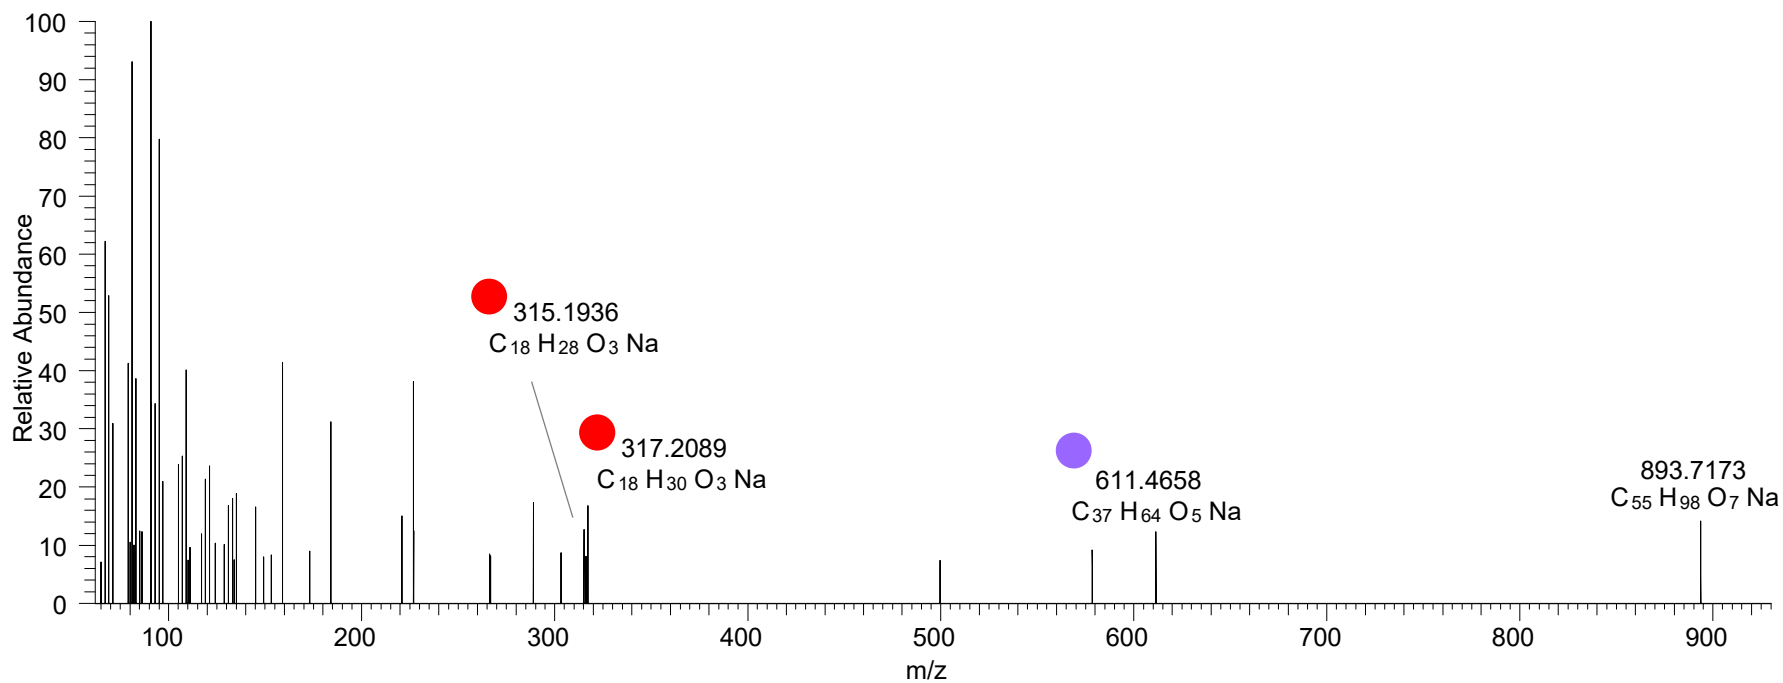

# TG(16:0\_18:1\_18:2<ep>)

RT 25.4

[oxTG+Na]<sup>+</sup>

XIC 893.7204 NL: 2.02E5

- Fragments containing oxFAs
- Fragments related to water loss
- Fragments not containing oxFAs
- Fragments related to other oxLPPs
- Position-specific fragments
- Fragments related to FA loss
- Fragments related to oxFA loss

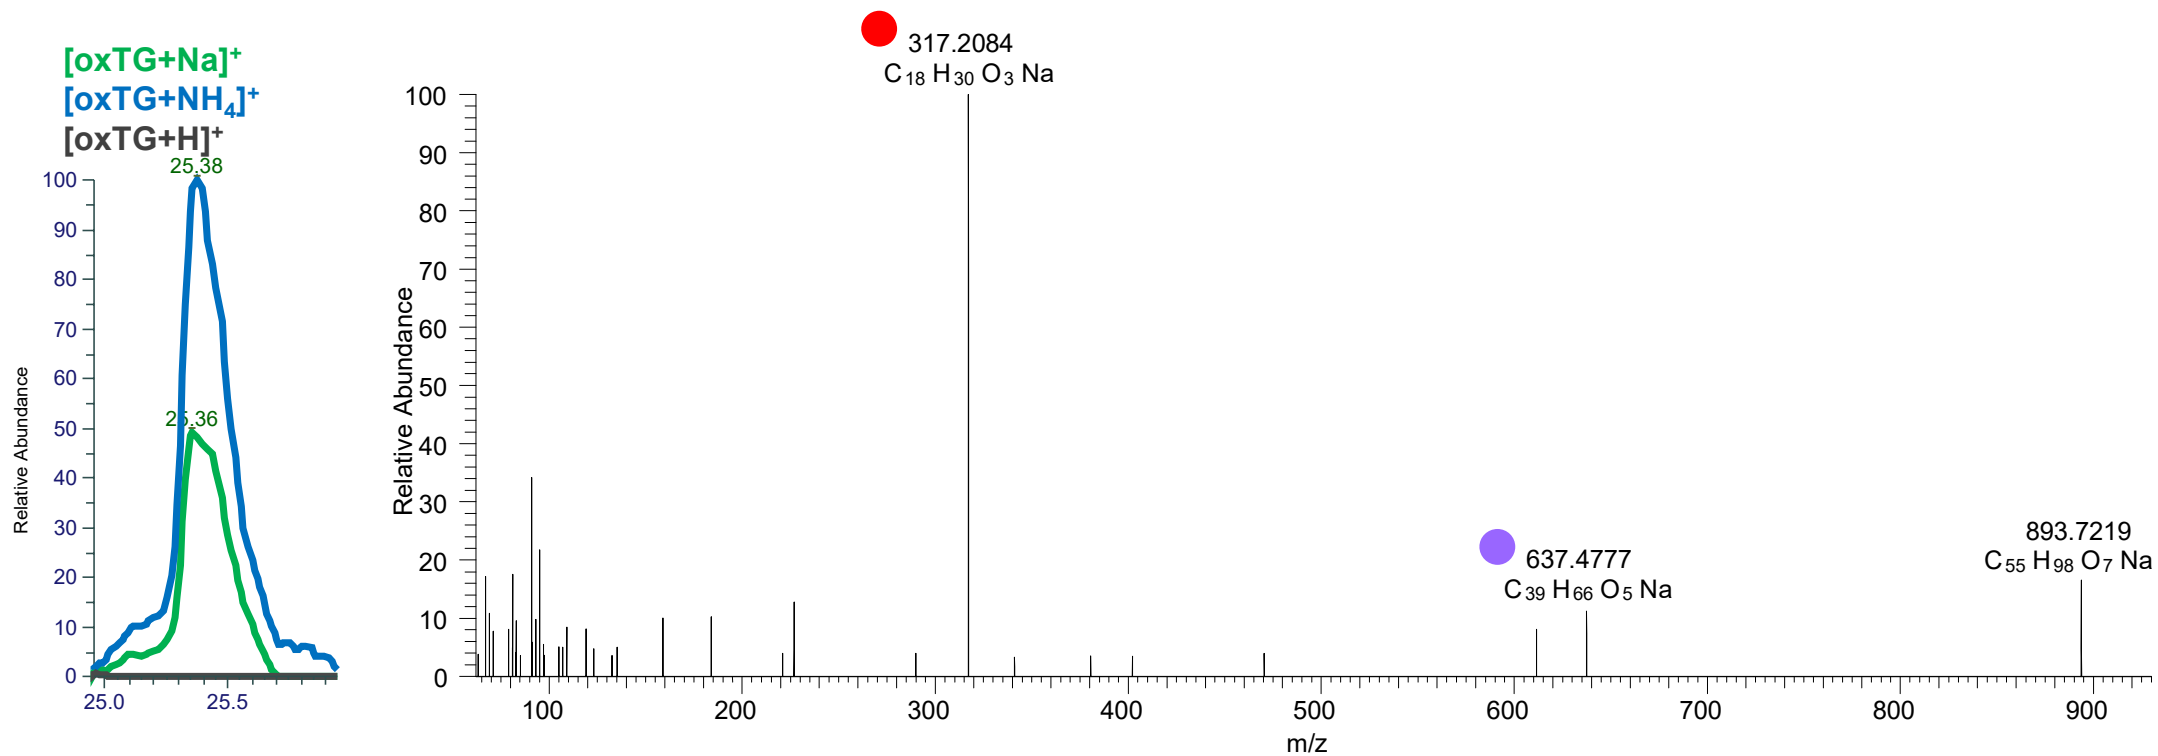

# TG(16:0\_18:1\_18:2<OH>)

RT 23.4

[oxTG+Na]<sup>+</sup>

XIC 895.7361 NL: 7.26E5

- Fragments containing oxFAs
- Fragments related to water loss
- Fragments not containing oxFAs
- Fragments related to other oxLPPs
- Position-specific fragments
- Fragments related to FA loss
- Fragments related to oxFA loss

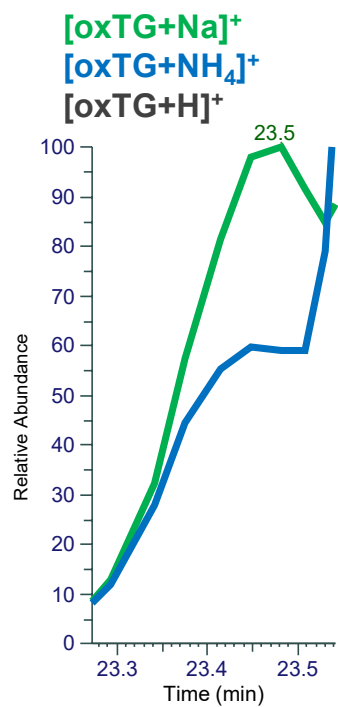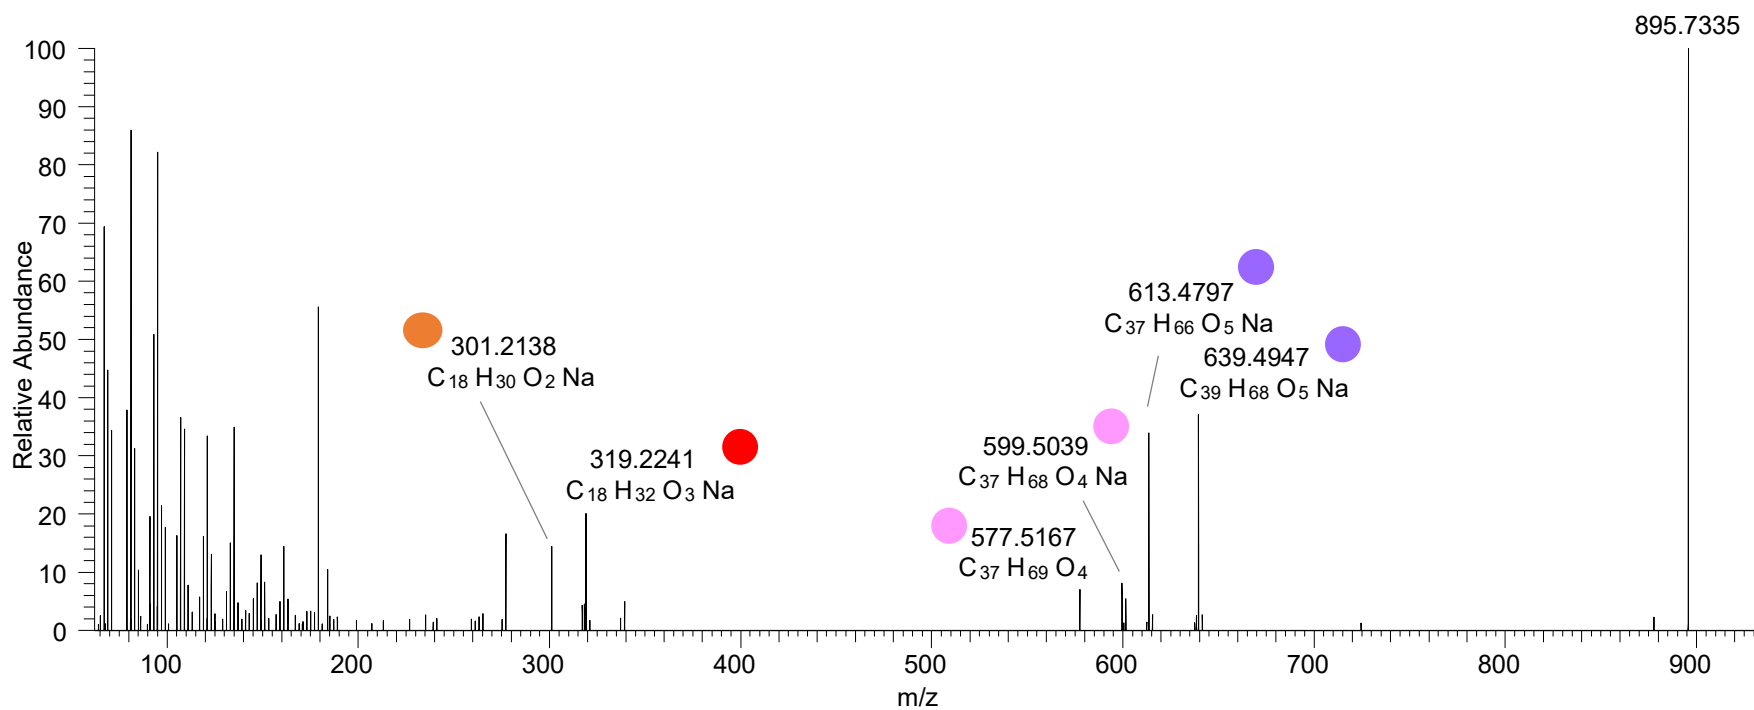

# TG(16:0\_18:1\_18:2<OH>)

RT 23.7

[oxTG+Na]<sup>+</sup>

XIC 895.7361 NL: 2.27E6

- Fragments containing oxFAs
- Fragments related to water loss
- Fragments not containing oxFAs
- Fragments related to other oxLPPs
- Position-specific fragments
- Fragments related to FA loss
- Fragments related to oxFA loss

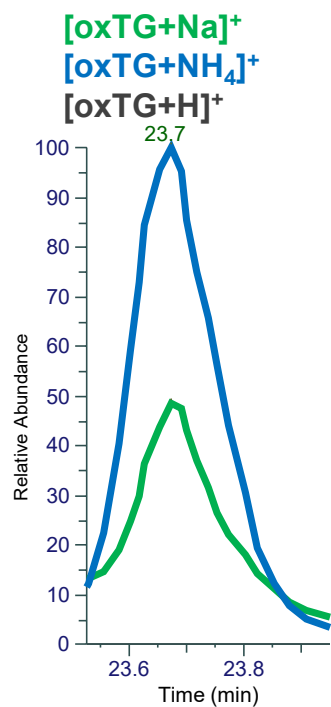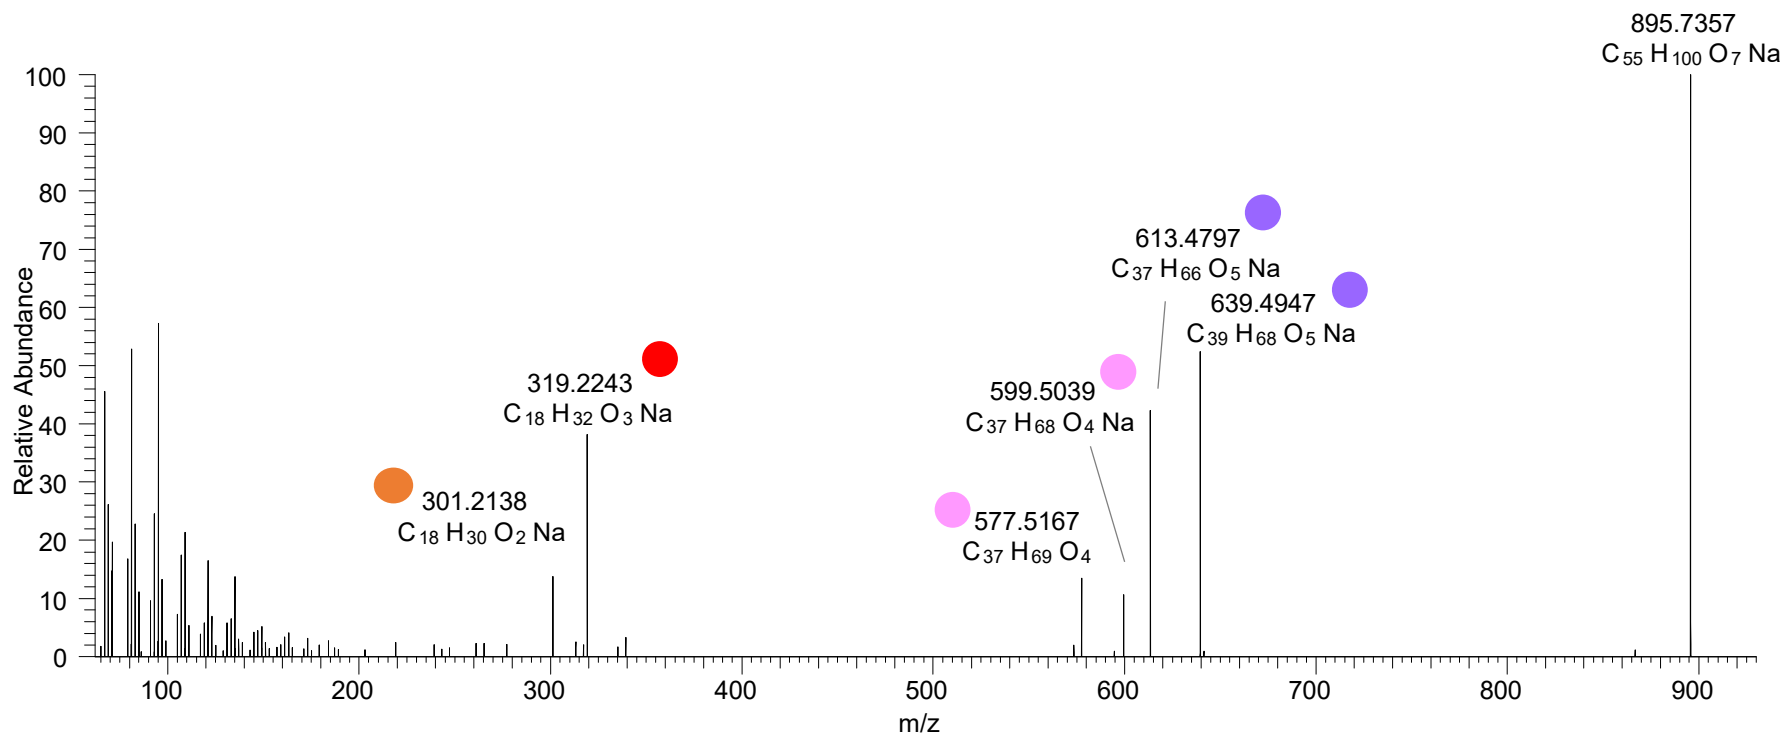

TG(16:0\_18:1\_18:2<O>)  
 TG(18:0\_18:2\_16:1<O>)  
 RT 24.3

[oxTG+Na]<sup>+</sup>

XIC 895.7361 NL: 1.71E5

- Fragments containing oxFAs
- Fragments related to water loss
- Fragments not containing oxFAs
- Fragments related to other oxLPPs
- Position-specific fragments
- Fragments related to FA loss
- Fragments related to oxFA loss

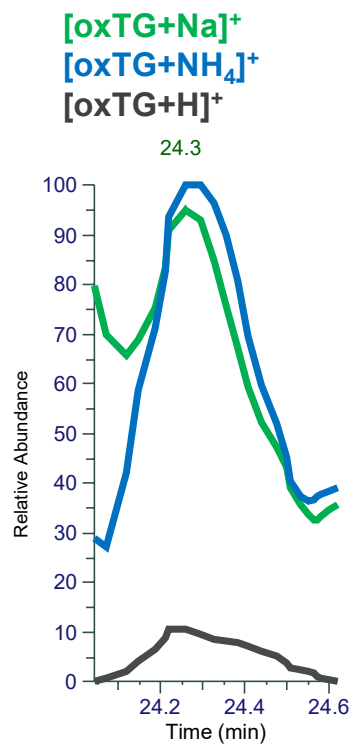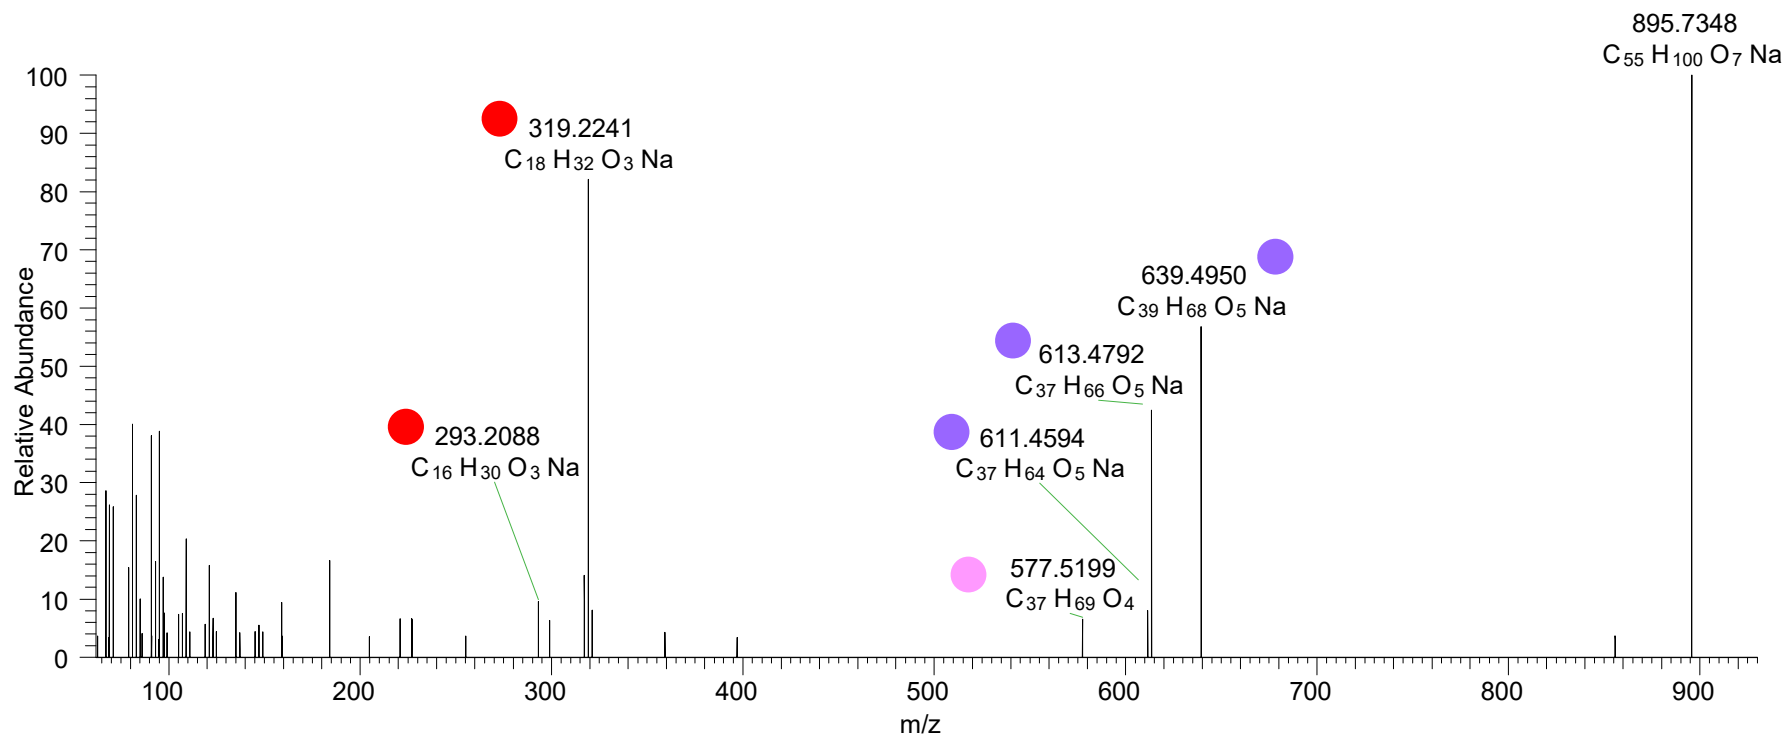

# TG(16:0\_18:1\_18:2<O>)

## RT 24.8

[oxTG+Na]<sup>+</sup>

XIC 895.7361 NL: 8.07E4

- Fragments containing oxFAs
- Fragments related to water loss
- Fragments not containing oxFAs
- Fragments related to other oxLPPs
- Position-specific fragments
- Fragments related to FA loss
- Fragments related to oxFA loss

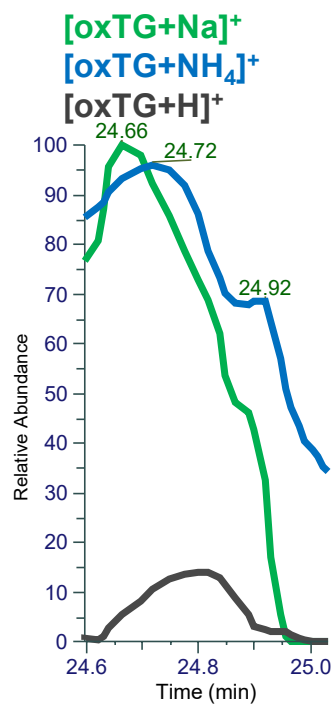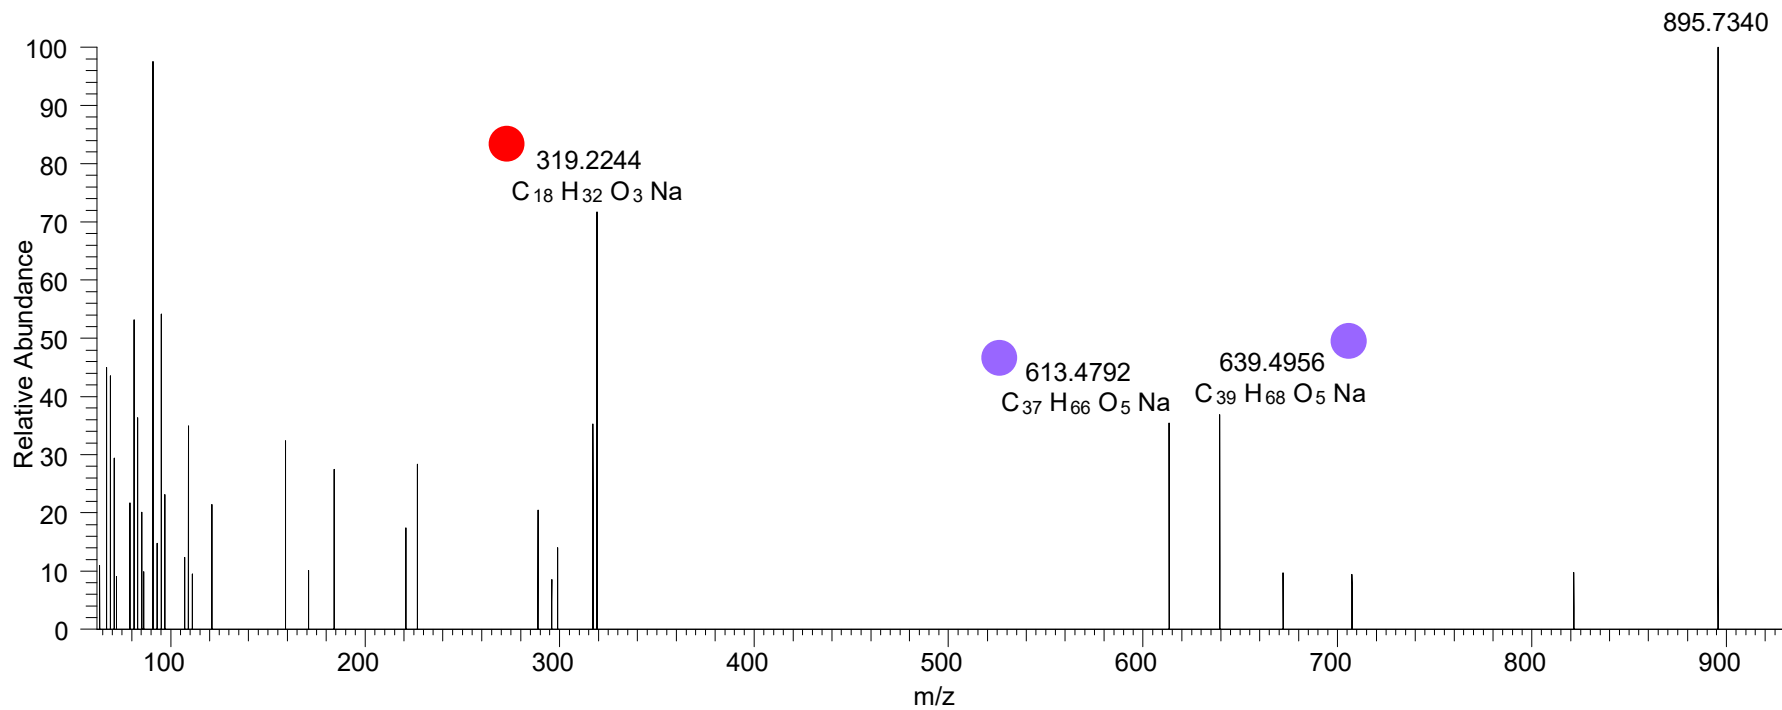

# TG(16:0\_18:1\_18:1<OH>)

RT 24.1

[oxTG+Na]<sup>+</sup>

XIC 897.7517 NL: 4.14E5

- Fragments containing oxFAs
- Fragments related to water loss
- Fragments not containing oxFAs
- Fragments related to other oxLPPs
- Position-specific fragments
- Fragments related to FA loss
- Fragments related to oxFA loss

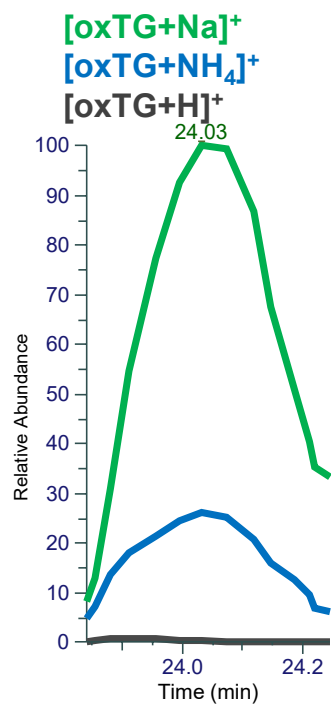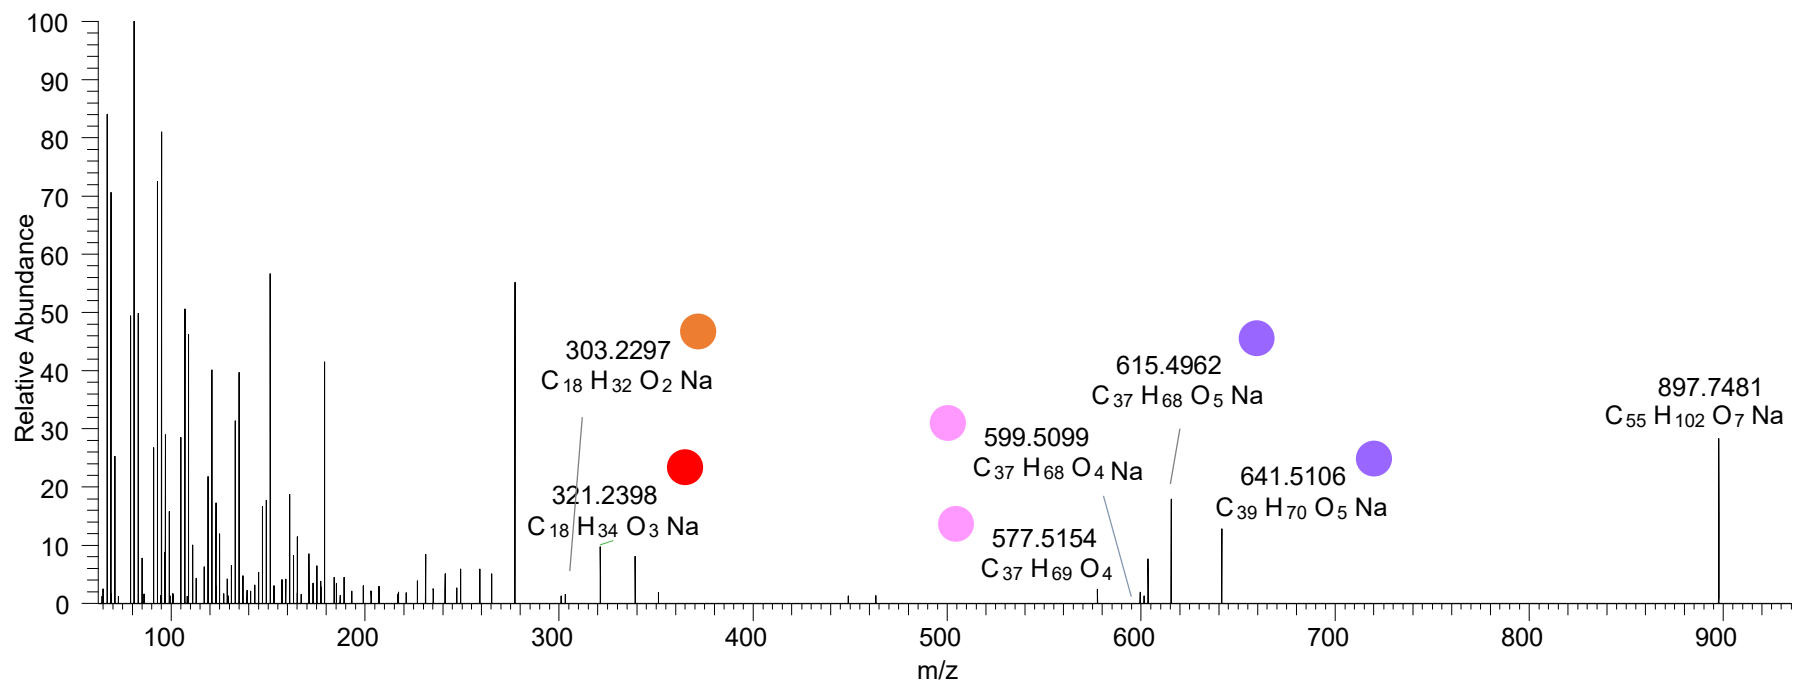



# TG(16:0\_18:0\_18:2<OH>)

RT 24.4

[oxTG+Na]<sup>+</sup>

XIC 897.7517 NL: 1.35E5

- Fragments containing oxFAs
- Fragments related to water loss
- Fragments not containing oxFAs
- Fragments related to other oxLPPs
- Position-specific fragments
- Fragments related to FA loss
- Fragments related to oxFA loss

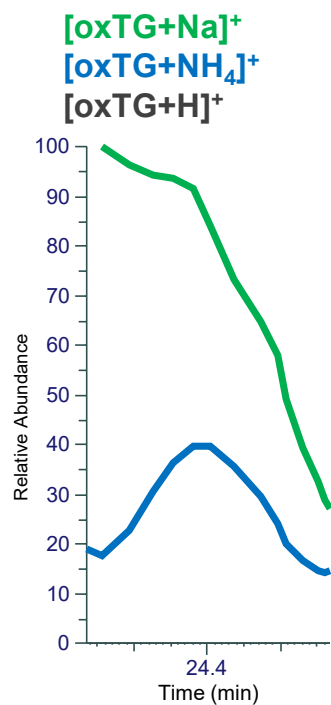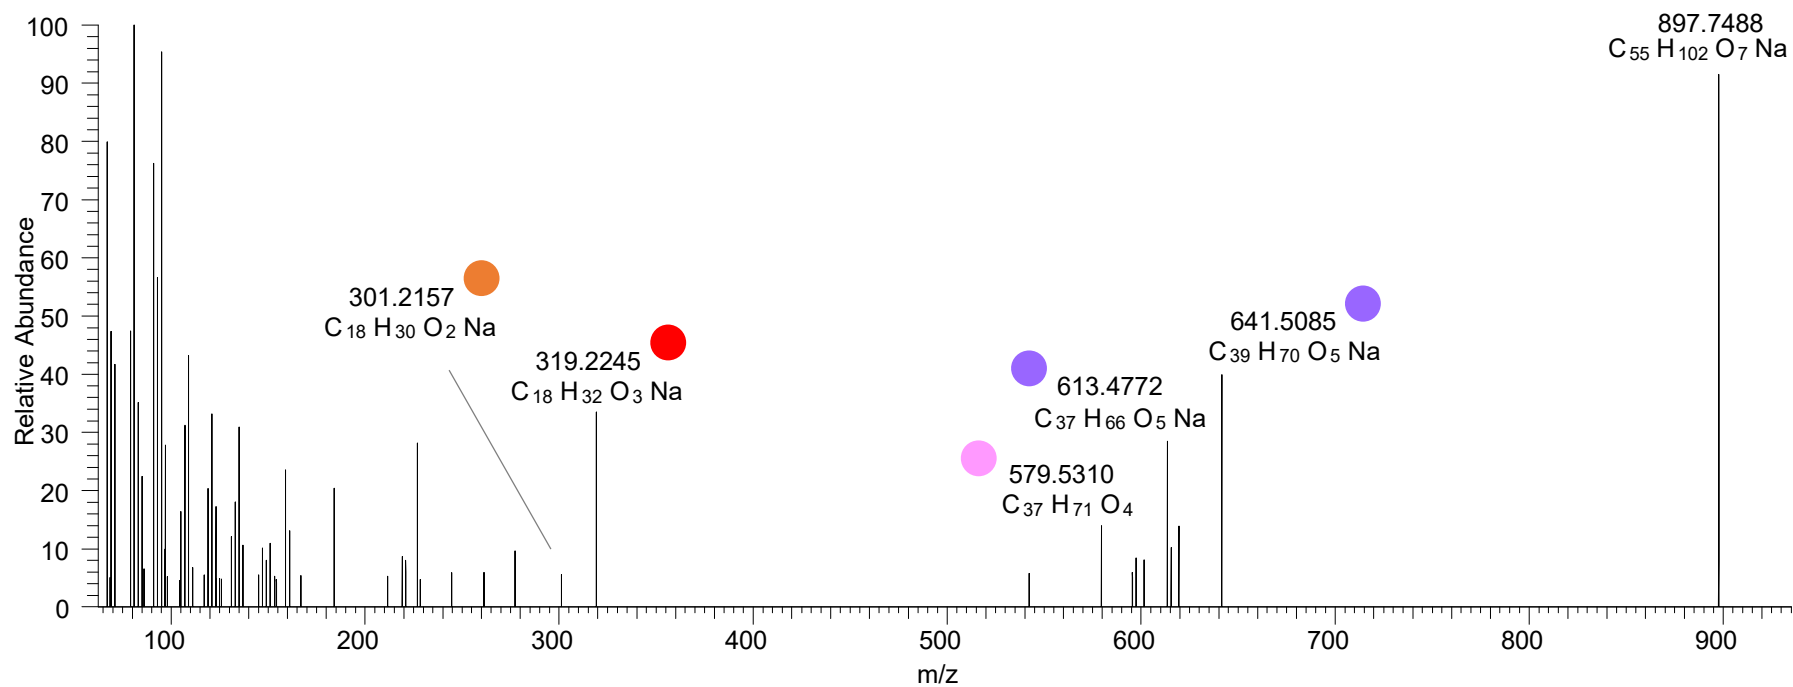

# TG(16:0\_18:3\_18:1<2OH>)

RT 20.2

[oxTG+Na]<sup>+</sup>

XIC 909.7154 NL: 1.57E5

- Fragments containing oxFAs
- Fragments related to water loss
- Fragments not containing oxFAs
- Fragments related to other oxLPPs
- Position-specific fragments
- Fragments related to FA loss
- Fragments related to oxFA loss

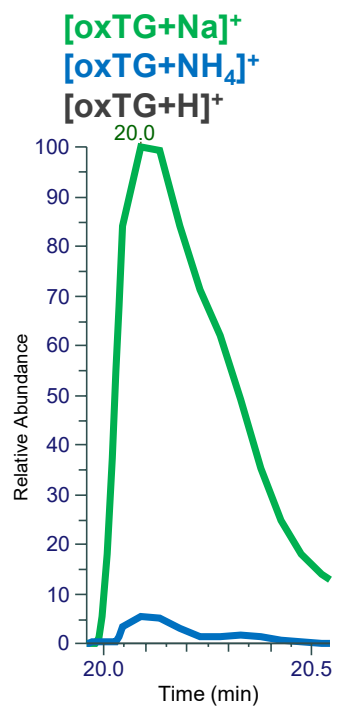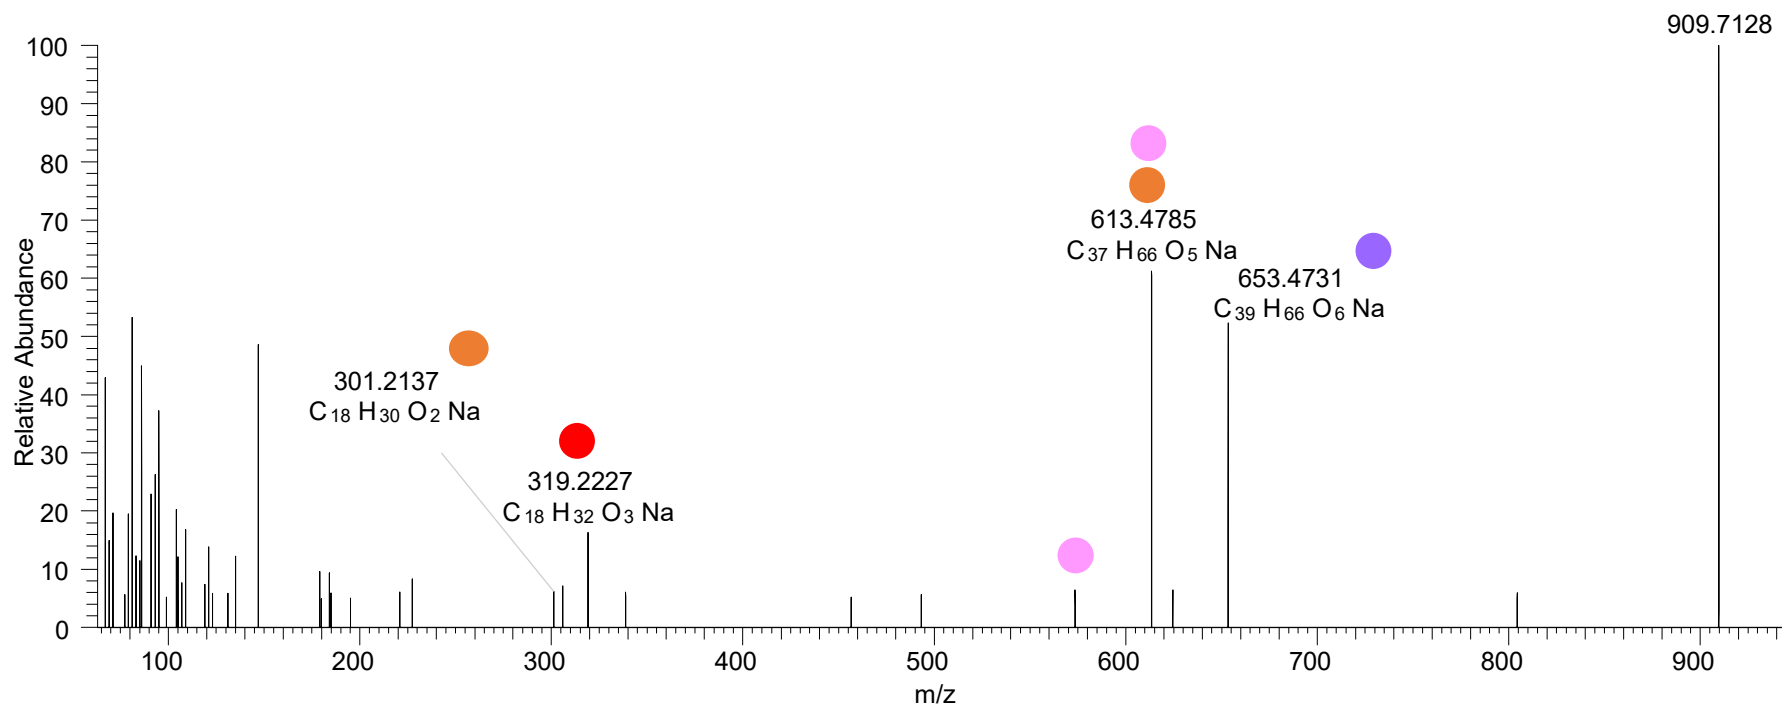

# TG(16:0\_18:1\_18:3<OH,O>)

RT 21.6

[[oxTG+Na]<sup>+</sup>

XIC 909.7154 NL: 9.65E4

- Fragments containing oxFAs
- Fragments related to water loss
- Fragments not containing oxFAs
- Fragments related to other oxLPPs
- Position-specific fragments
- Fragments related to FA loss
- Fragments related to oxFA loss

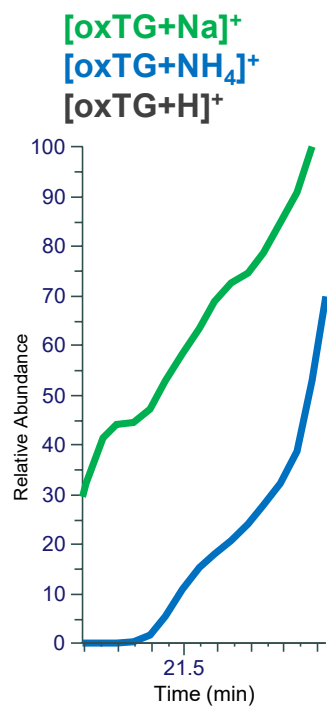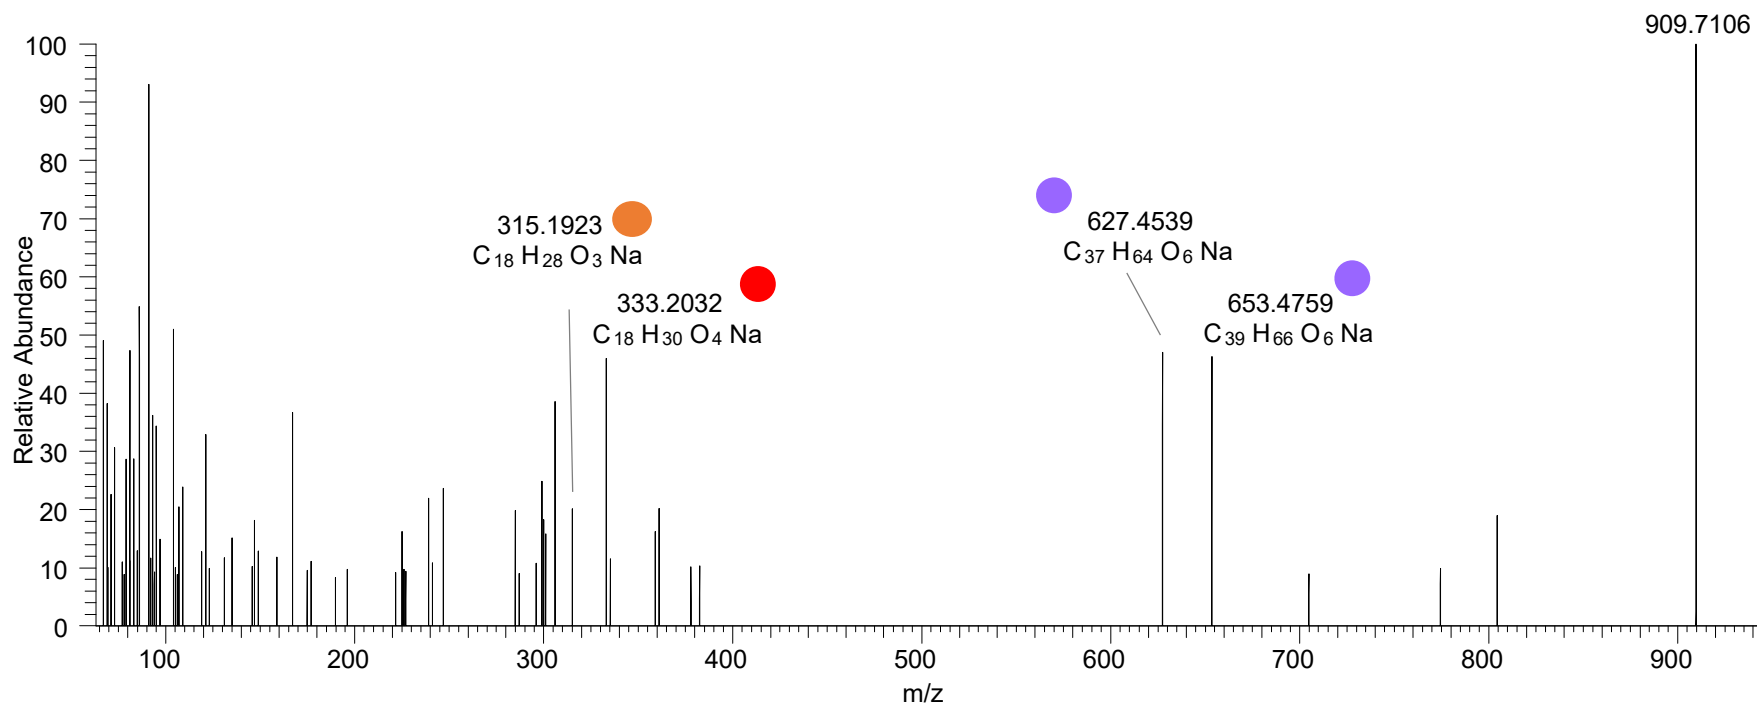

TG(16:1\_18:1\_18:2<2O>)  
 TG(16:0\_18:1\_18:3<2O>)  
 TG(16:0\_18:2\_18:2<2O>)  
 TG(16:0\_16:0\_20:4<2O>)  
 RT 22.1

[oxTG+Na]<sup>+</sup>

XIC 909.7154 NL: 1.48E5

- Fragments containing oxFAs
- Fragments related to water loss
- Fragments not containing oxFAs
- Fragments related to other oxLPPs
- Position-specific fragments
- Fragments related to FA loss
- Fragments related to oxFA loss

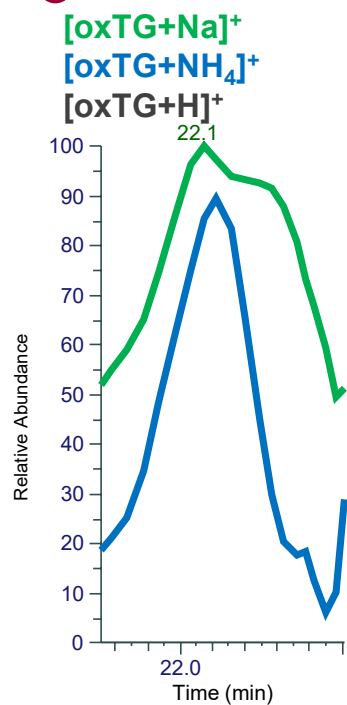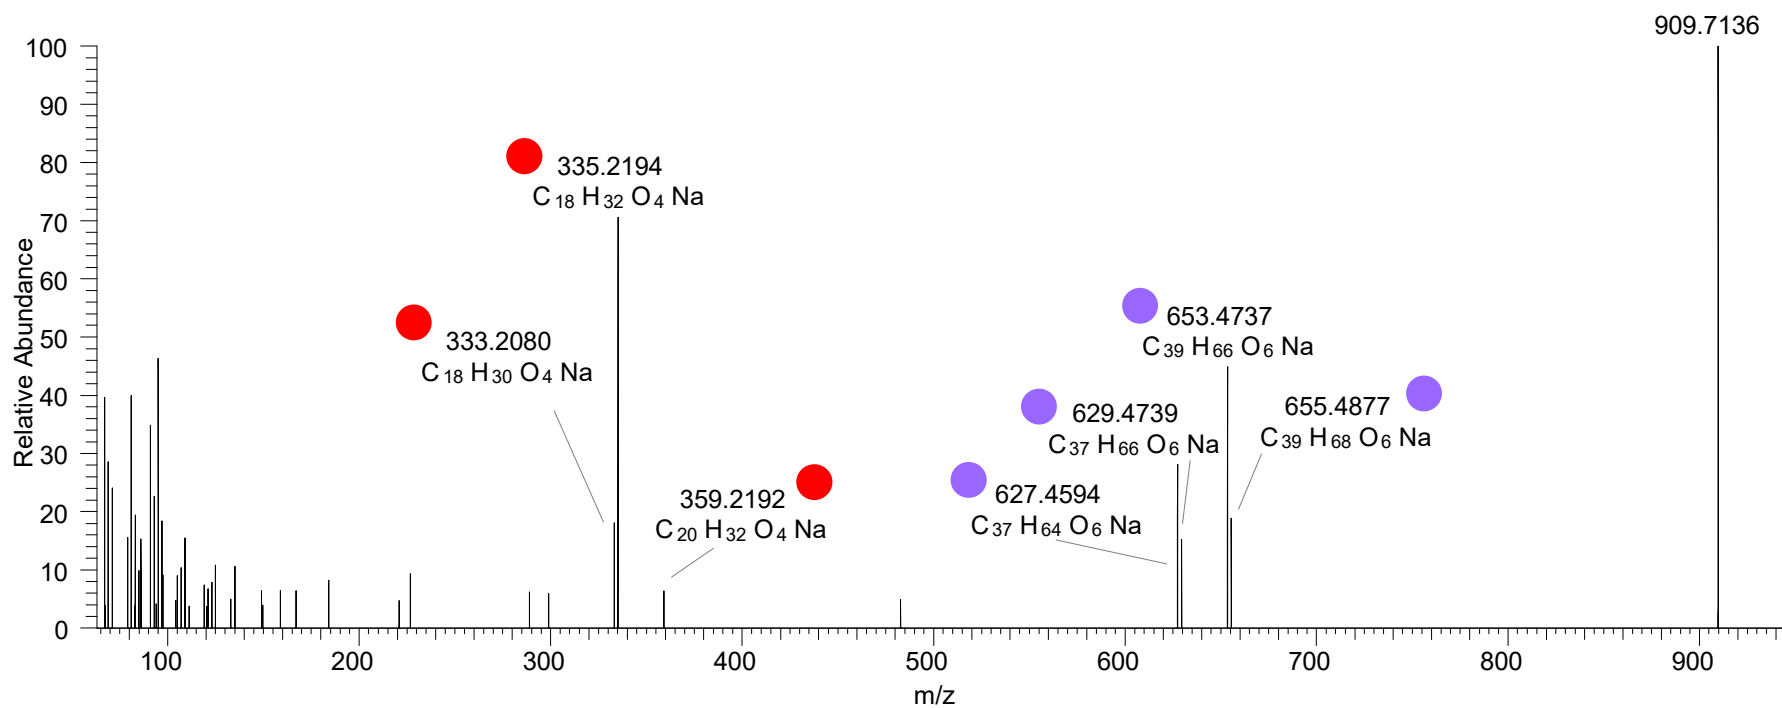

TG(16:0\_18:2\_18:2<OOH{13}>)  
 TG(16:1\_18:1\_18:2<OOH{13}>)  
 TG(16:0\_18:1\_18:3<2O>)  
 RT 23.0

[oxTG+Na]<sup>+</sup>

XIC 909.7154 NL: 2.29E6

- Fragments containing oxFAs
- Fragments related to water loss
- Fragments not containing oxFAs
- Fragments related to other oxLPPs
- Position-specific fragments
- Fragments related to FA loss
- Fragments related to oxFA loss

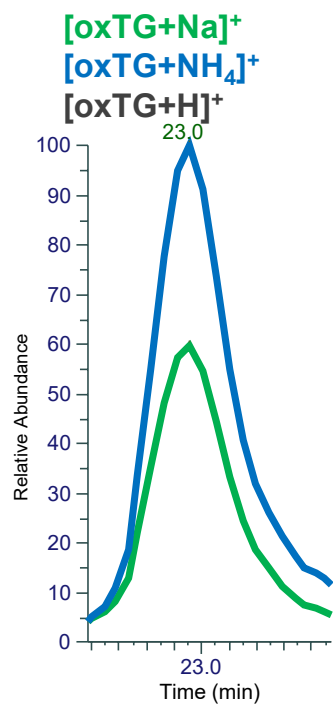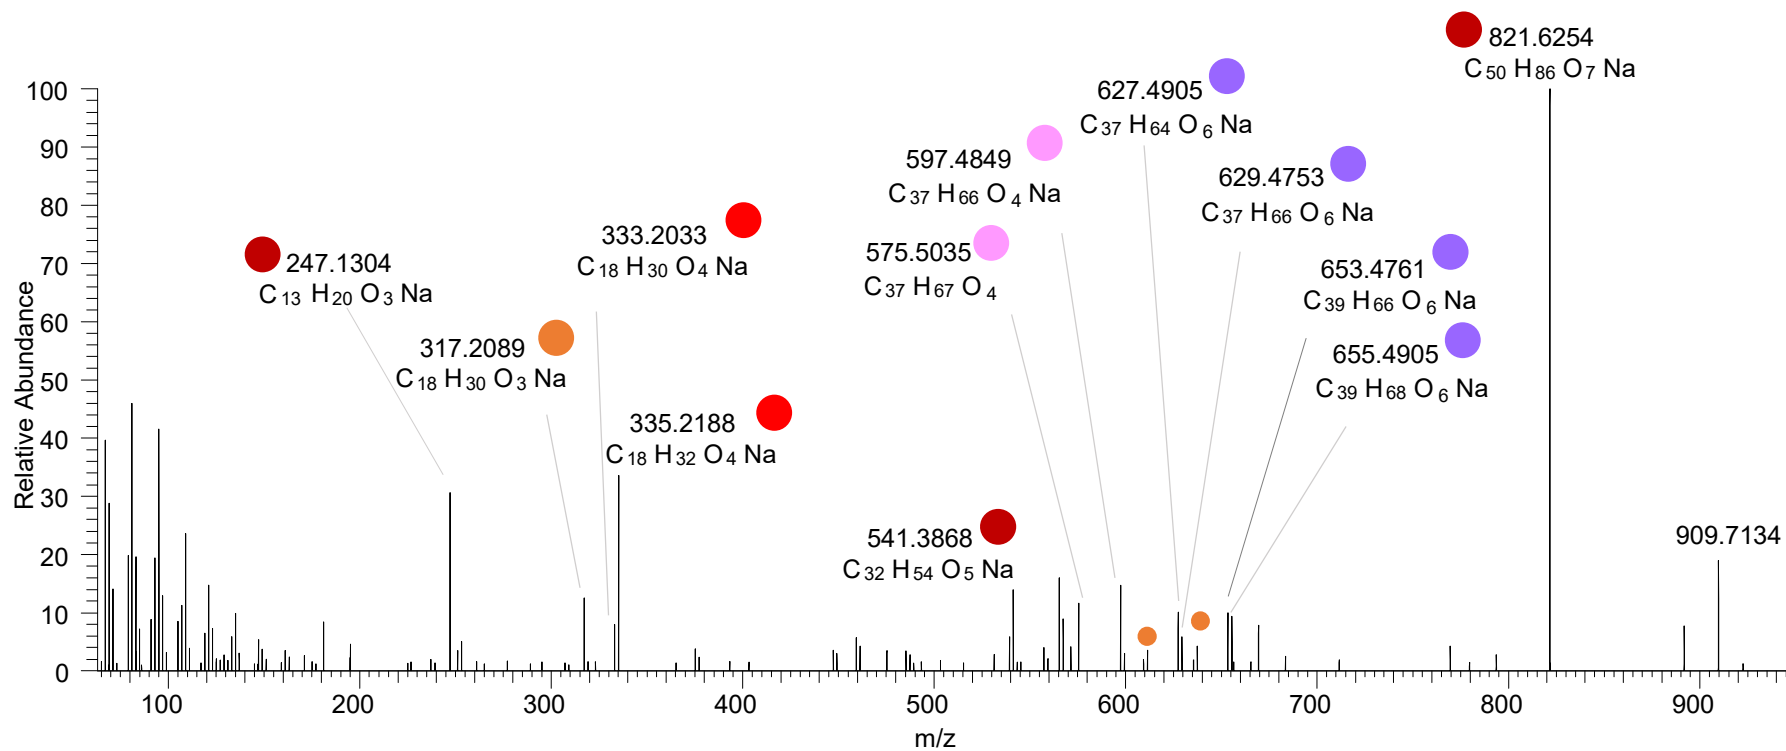

TG(16:0\_18:1\_18:3<OOH{13}>)  
 TG(16:0\_18:1\_18:3<OOH{16}>)  
 RT 23.3

[oxTG+Na]<sup>+</sup>

XIC 909.7154 NL: 2.29E6

- Fragments containing oxFAs
- Fragments related to water loss
- Fragments not containing oxFAs
- Fragments related to other oxLPPs
- Position-specific fragments
- Fragments related to FA loss
- Fragments related to oxFA loss

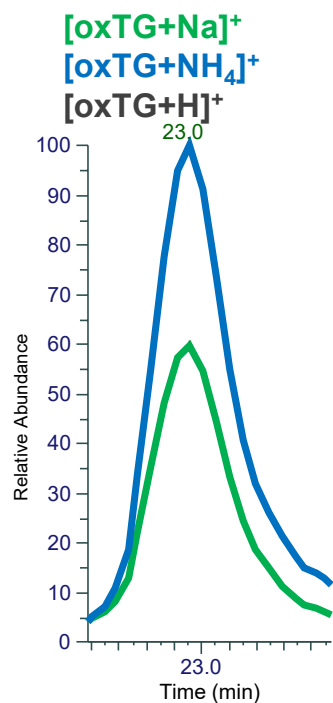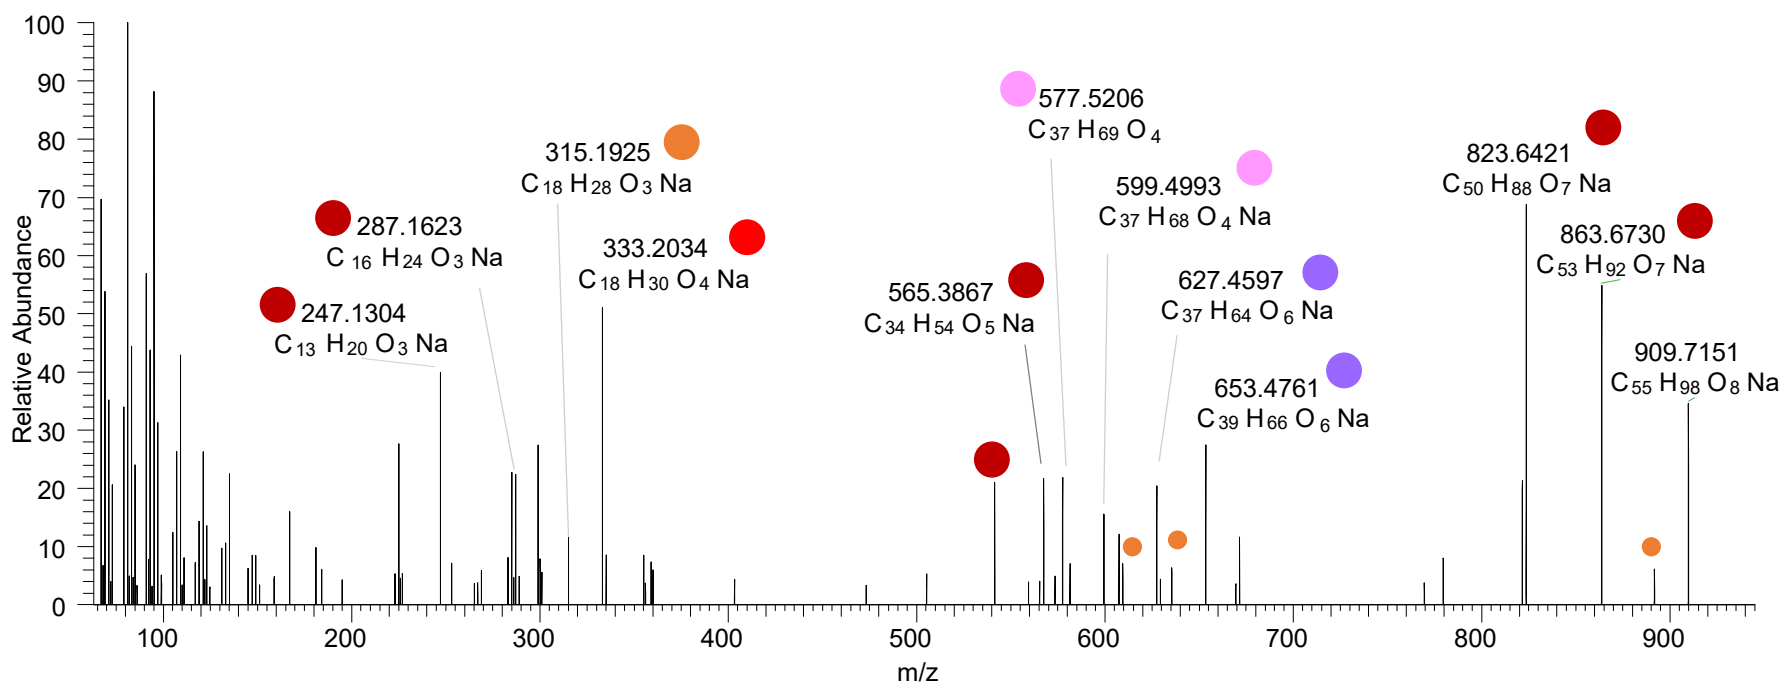

# TG(16:0\_18:1\_18:1<OH,ep>)

## RT 22.7

[oxTG+Na]<sup>+</sup>

XIC 911.7310 NL: 1.52E5

- Fragments containing oxFAs
- Fragments related to water loss
- Fragments not containing oxFAs
- Fragments related to other oxLPPs
- Position-specific fragments
- Fragments related to FA loss
- Fragments related to oxFA loss

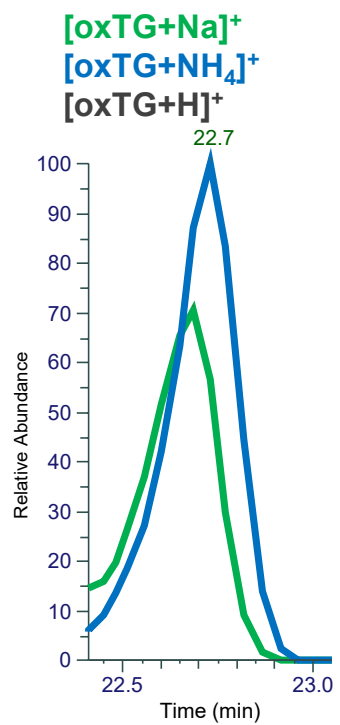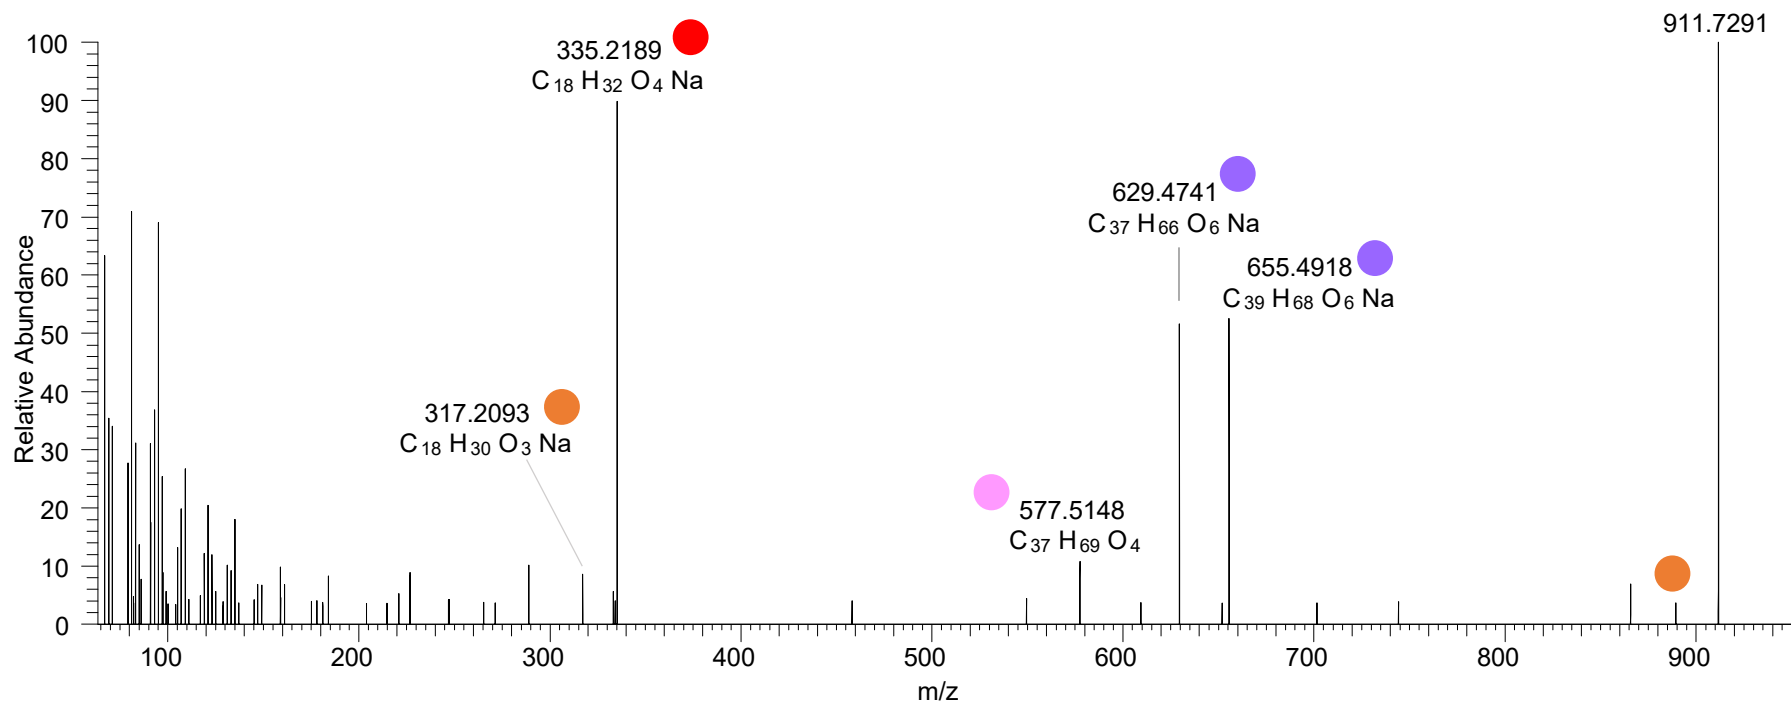

TG(16:0\_18:1\_18:2<OOH{11}>)  
TG(16:0\_18:1\_18:2<OOH{13}>)  
RT 23.4

[oxTG+Na]<sup>+</sup>

XIC 911.7310 NL: 9.73E5

- Fragments containing oxFAs
- Fragments related to water loss
- Fragments not containing oxFAs
- Fragments related to other oxLPPs
- Position-specific fragments
- Fragments related to FA loss
- Fragments related to oxFA loss

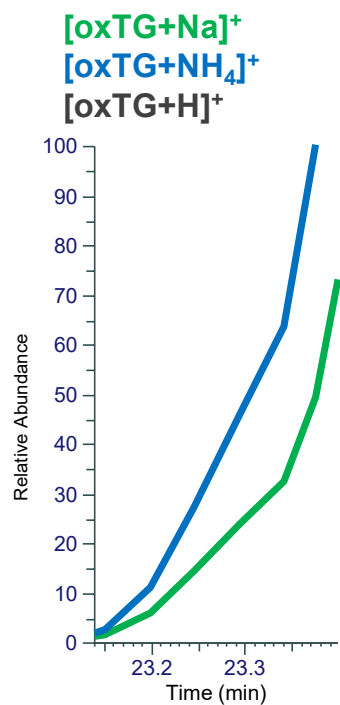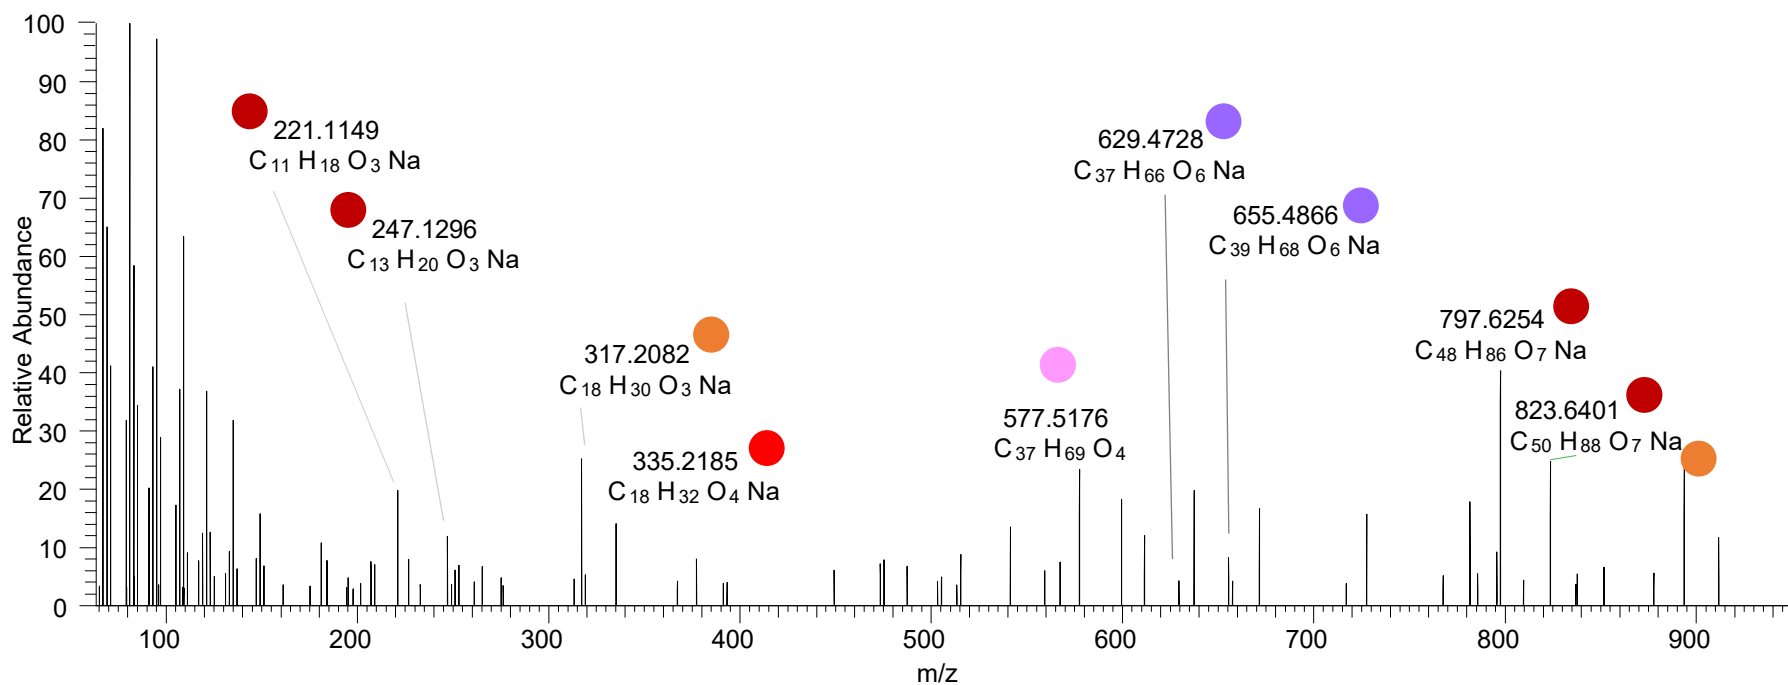



# TG(16:0\_18:1\_18:2<OOH{13}>)

RT 23.5

[oxTG+Na]<sup>+</sup>

XIC 911.7310 NL: 4.68E6

- Fragments containing oxFAs
- Fragments related to water loss
- Fragments not containing oxFAs
- Fragments related to other oxLPPs
- Position-specific fragments
- Fragments related to FA loss
- Fragments related to oxFA loss

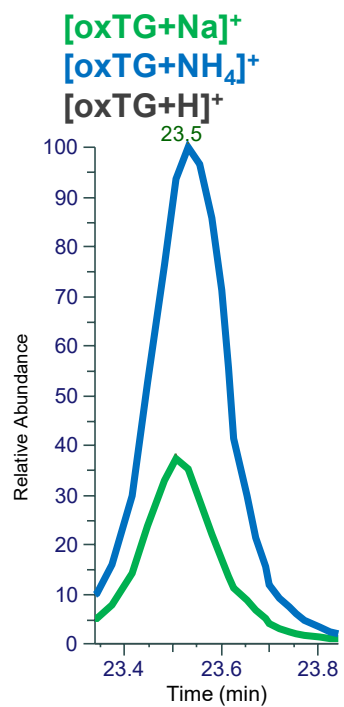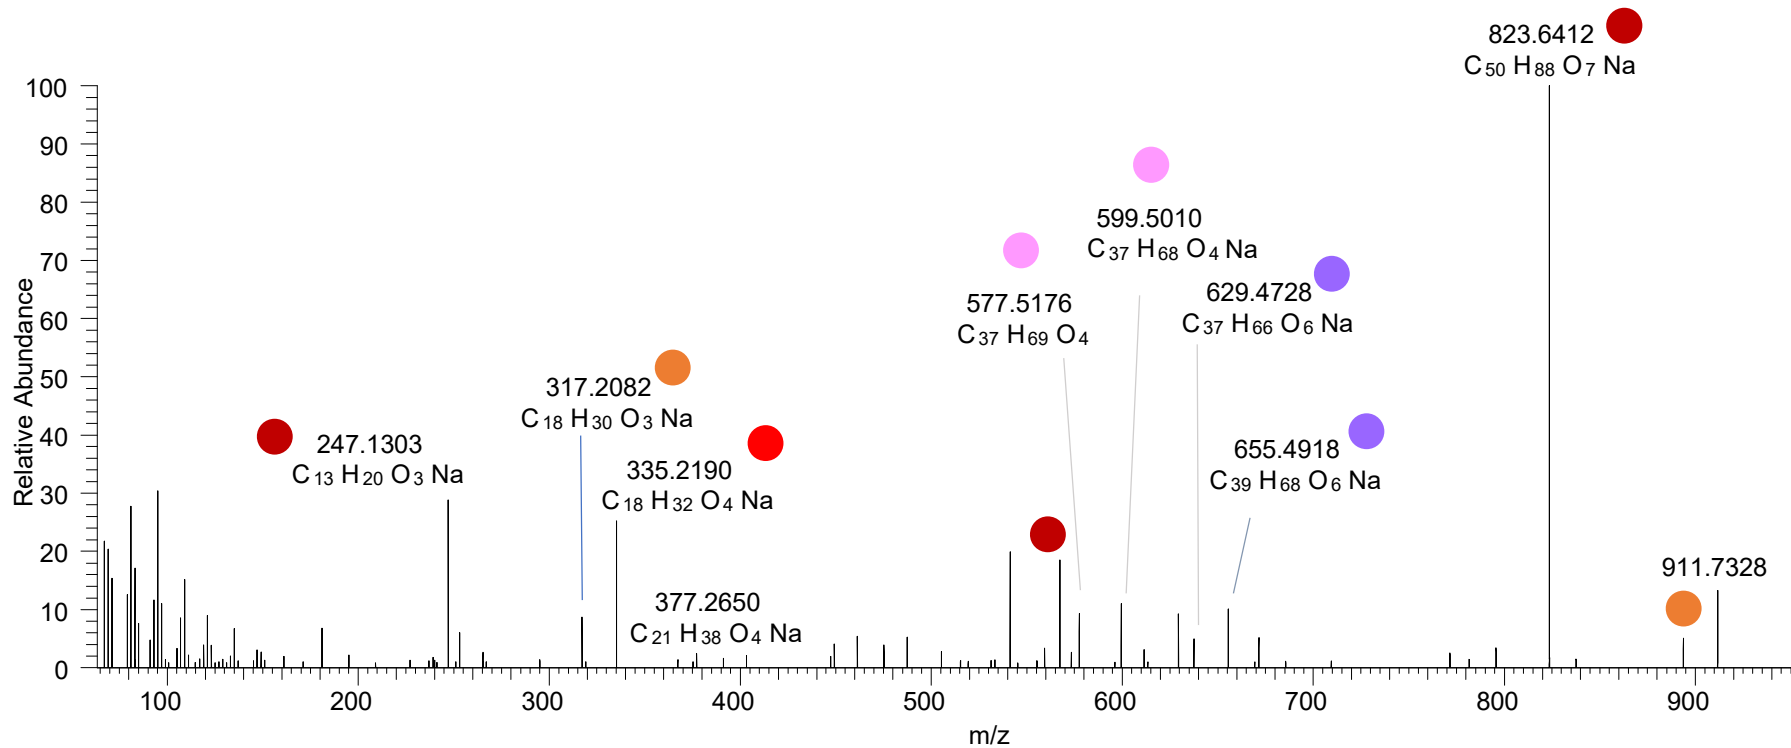

TG(16:0\_18:1\_18:2<OOH{10}>)  
TG(16:0\_18:1\_18:2<OOH{13}>)  
RT 23.8

[oxTG+Na]<sup>+</sup>

XIC 911.7310 NL: 4.68E6

- Fragments containing oxFAs
- Fragments related to water loss
- Fragments not containing oxFAs
- Fragments related to other oxLPPs
- Position-specific fragments
- Fragments related to FA loss
- Fragments related to oxFA loss

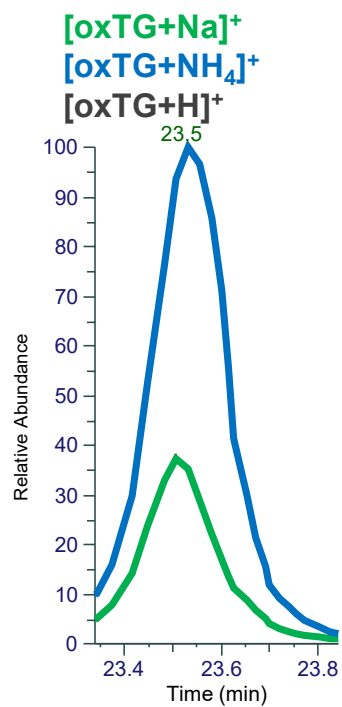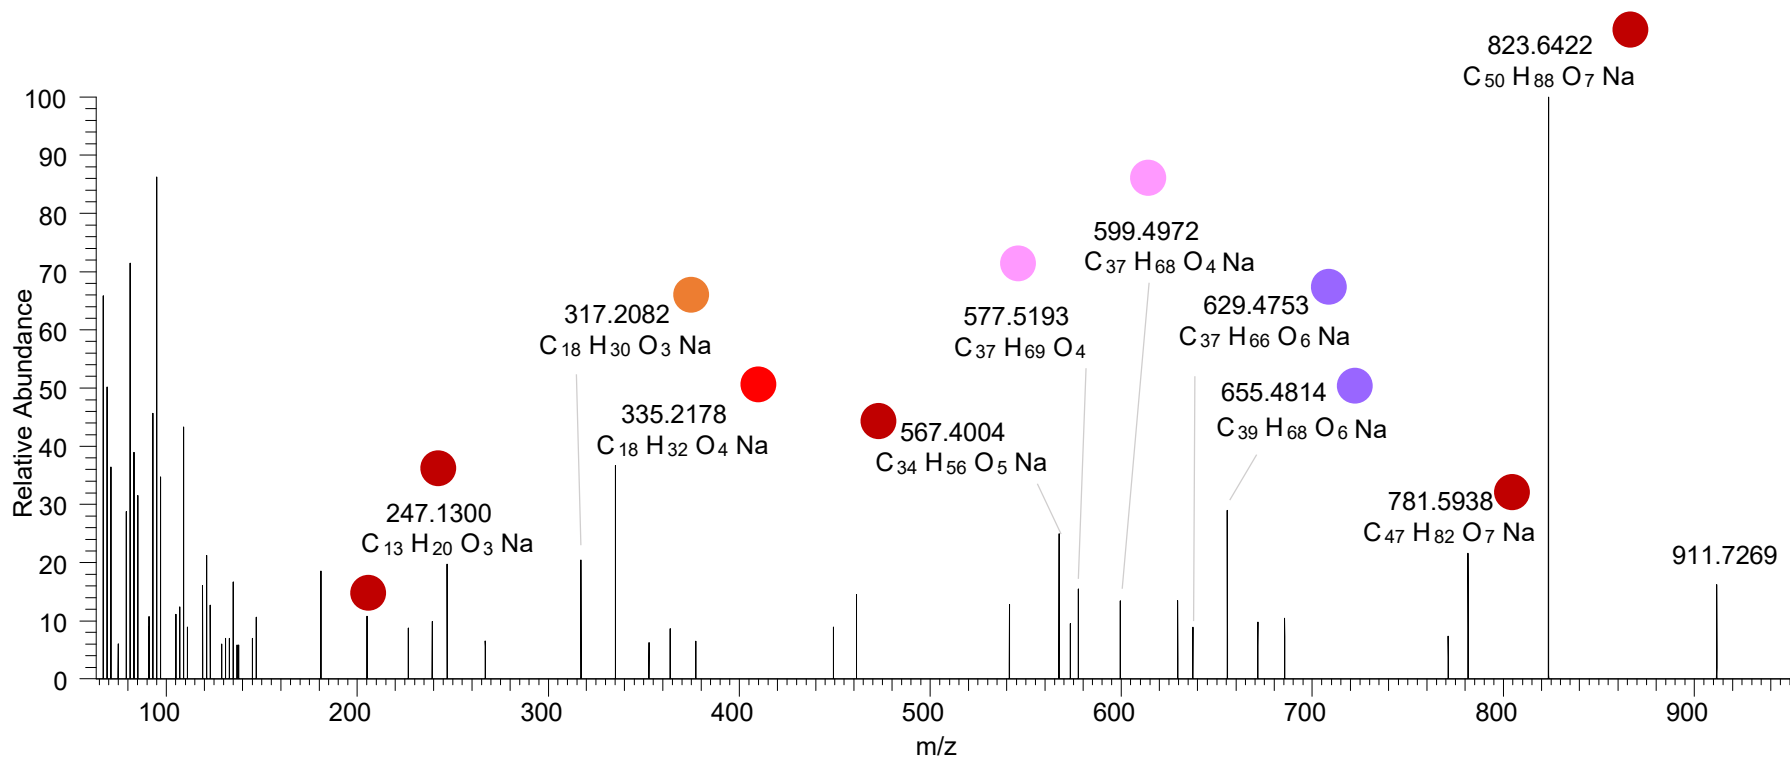

# TG(18:2\_18:2\_18:2<OH>)

## RT 22.5

[oxTG+Na]<sup>+</sup>

XIC 917.7204 NL: 5.85E5

- Fragments containing oxFAs
- Fragments related to water loss
- Fragments not containing oxFAs
- Fragments related to other oxLPPs
- Position-specific fragments
- Fragments related to FA loss
- Fragments related to oxFA loss

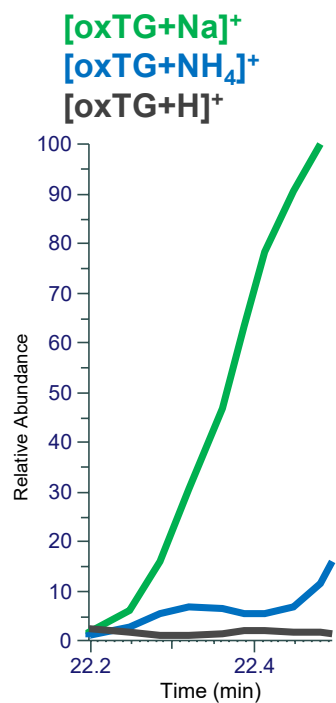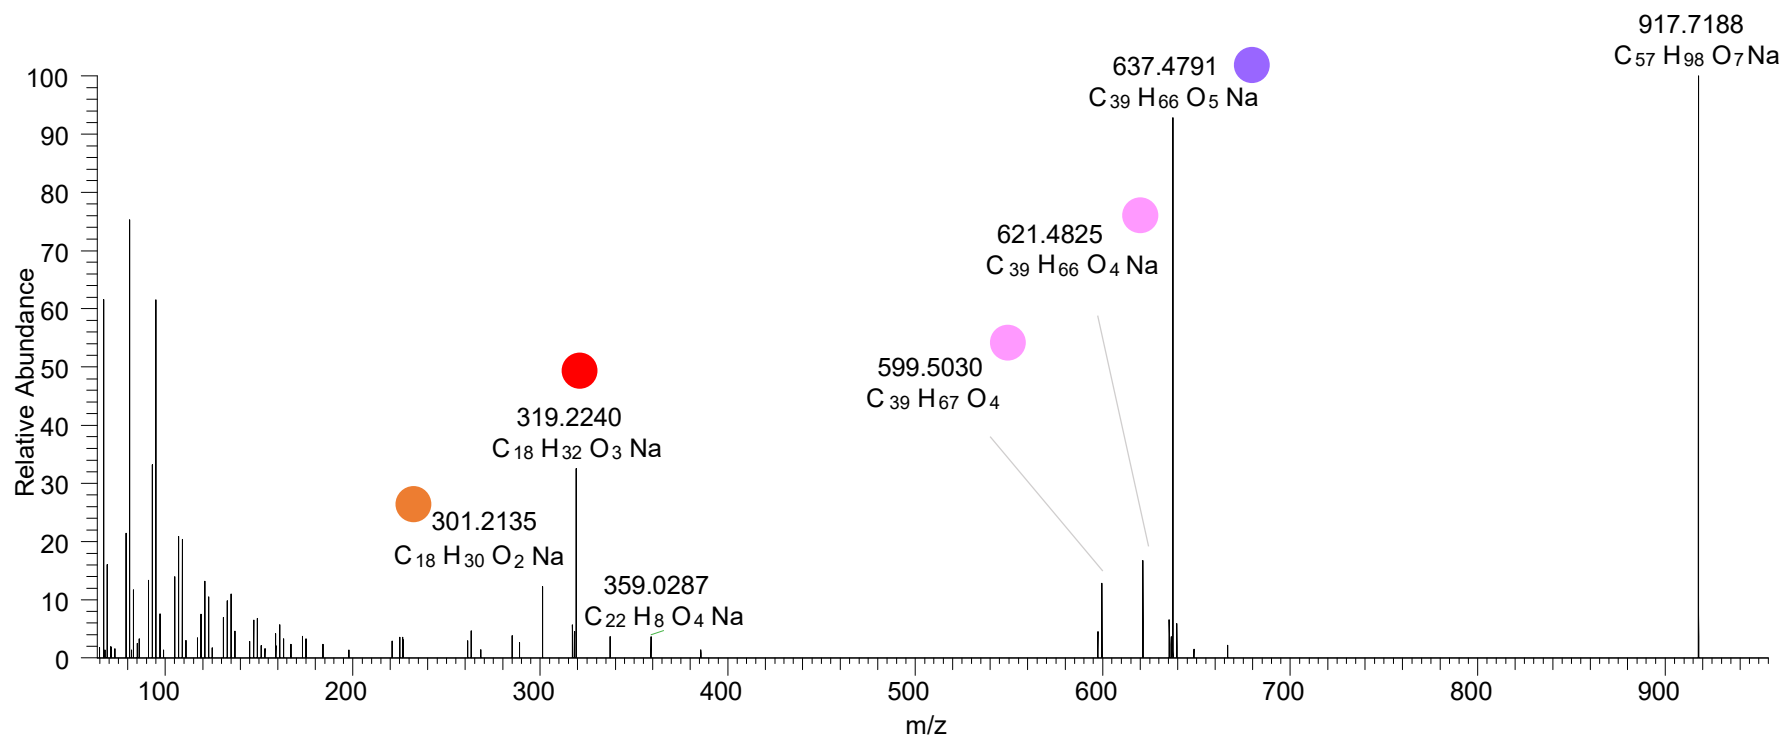

TG(18:2\_18:2\_18:2<OH>)  
TG(18:1\_18:2\_18:3<OH>)  
RT 22.7

[oxTG+Na]<sup>+</sup>

XIC 917.7204 NL: 7.14E5

- Fragments containing oxFAs
- Fragments related to water loss
- Fragments not containing oxFAs
- Fragments related to other oxLPPs
- Position-specific fragments
- Fragments related to FA loss
- Fragments related to oxFA loss

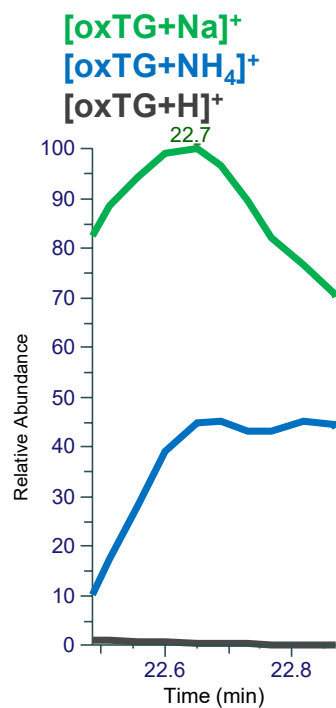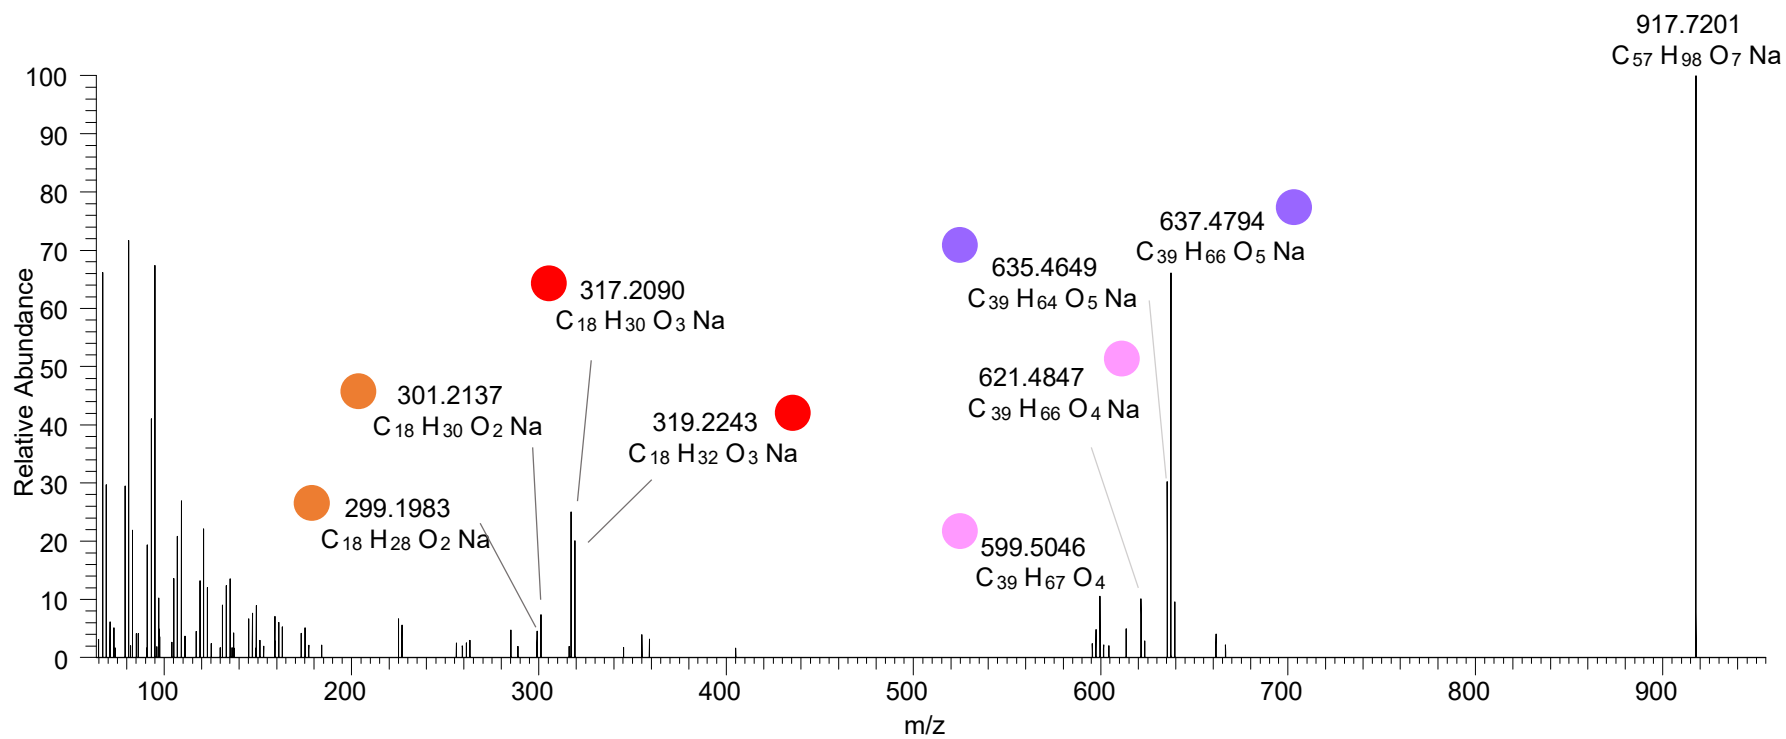

TG(18:1\_18:2\_18:3<OH>)  
 TG(18:2\_18:2\_18:2<OH>)  
 TG(16:0\_18:2\_20:4<O>)  
 RT 22.9

[oxTG+Na]<sup>+</sup>

XIC 917.7204 NL: 7.14E5

- Fragments containing oxFAs
- Fragments related to water loss
- Fragments not containing oxFAs
- Fragments related to other oxLPPs
- Position-specific fragments
- Fragments related to FA loss
- Fragments related to oxFA loss

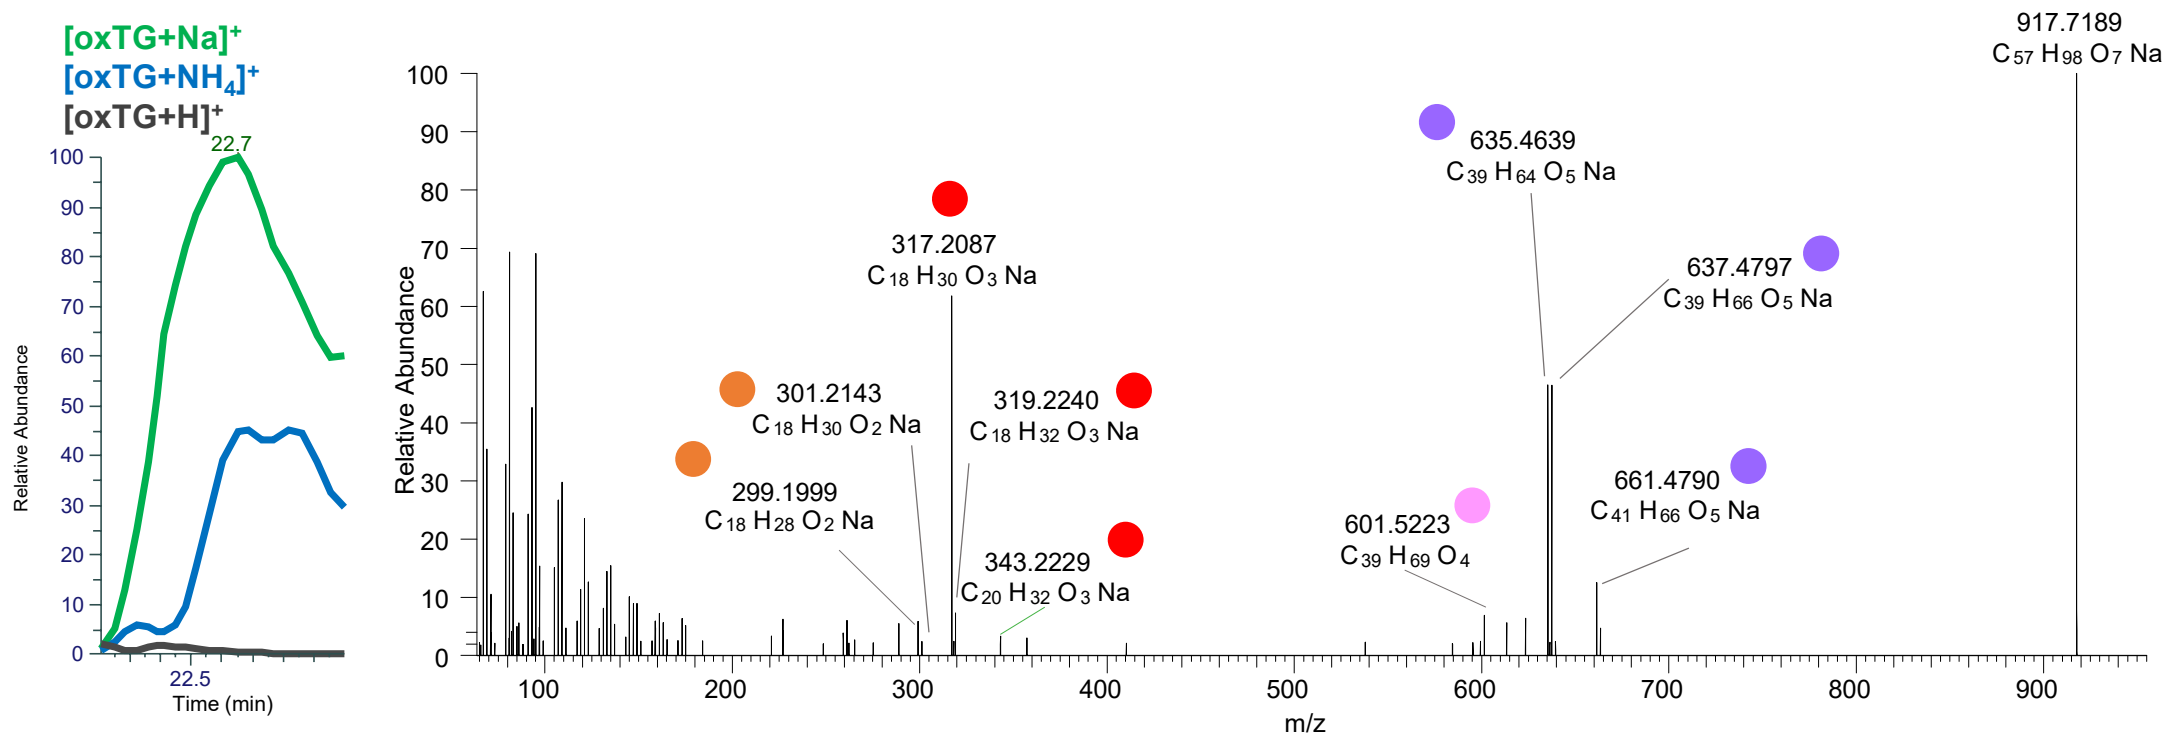

# TG(18:1\_18:2\_18:2<OH>)

RT 23.2

[oxTG+Na]<sup>+</sup>

XIC 919.7361 NL: 1.35E6

- Fragments containing oxFAs
- Fragments related to water loss
- Fragments not containing oxFAs
- Fragments related to other oxLPPs
- Position-specific fragments
- Fragments related to FA loss
- Fragments related to oxFA loss

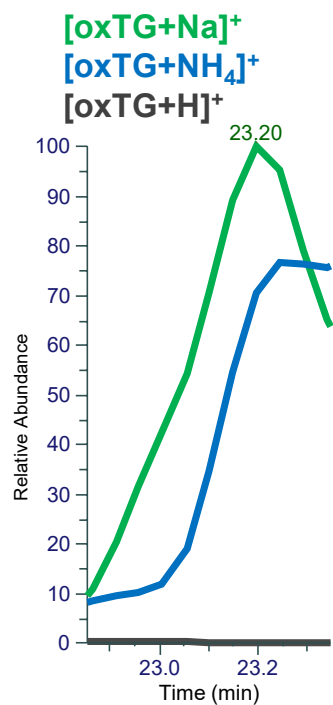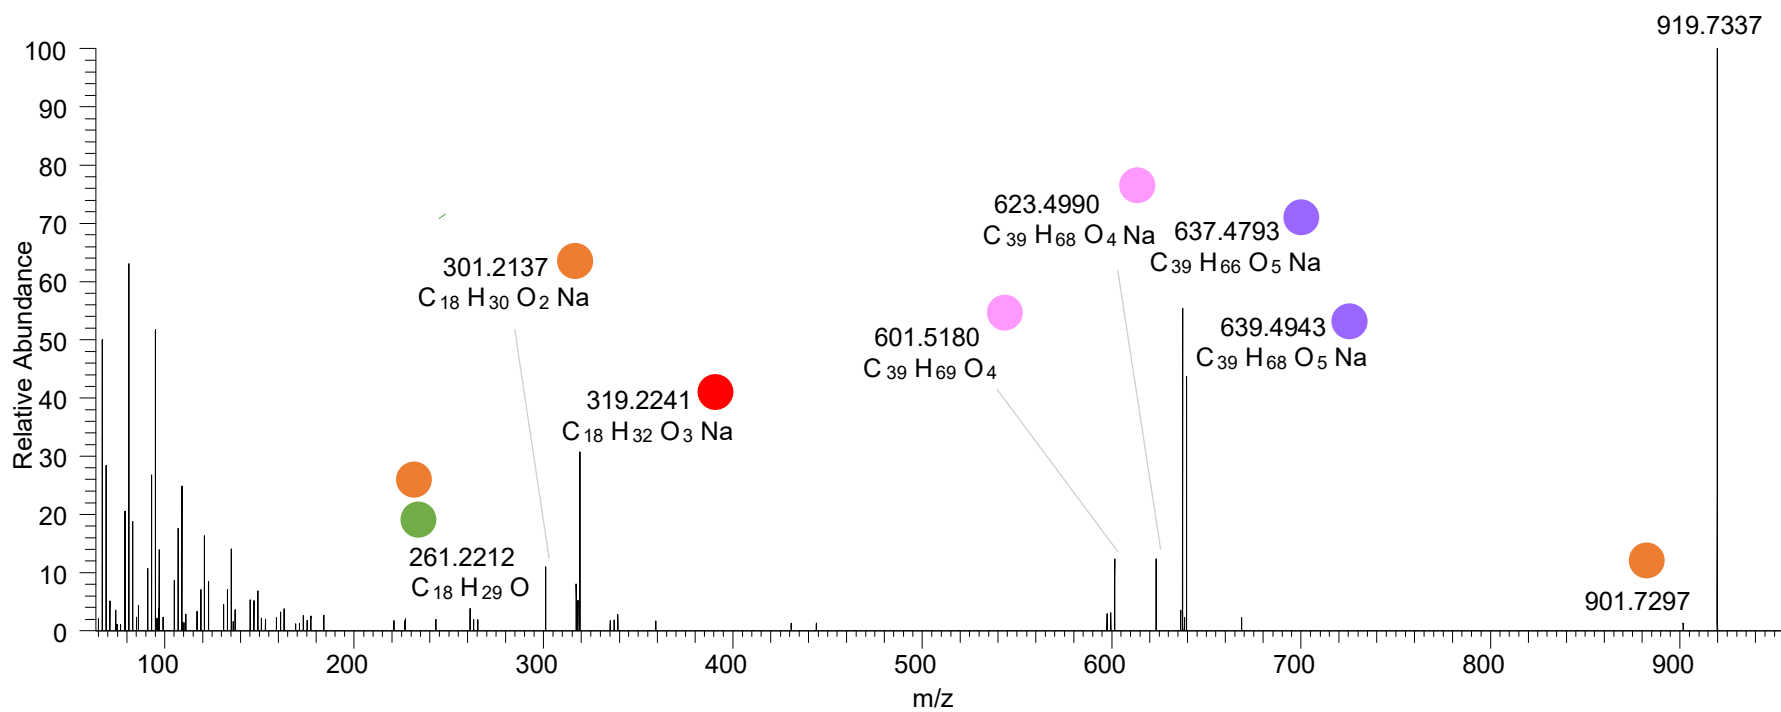

TG(18:1\_18:2\_18:2<OH>)  
 TG(18:1\_18:1\_18:3<OH>)  
 TG(16:0\_18:2\_20:3<O>)  
 RT 23.3

[oxTG+Na]<sup>+</sup>

XIC 919.7361 NL: 1.35E6

- Fragments containing oxFAs
- Fragments related to water loss
- Fragments not containing oxFAs
- Fragments related to other oxLPPs
- Position-specific fragments
- Fragments related to FA loss
- Fragments related to oxFA loss

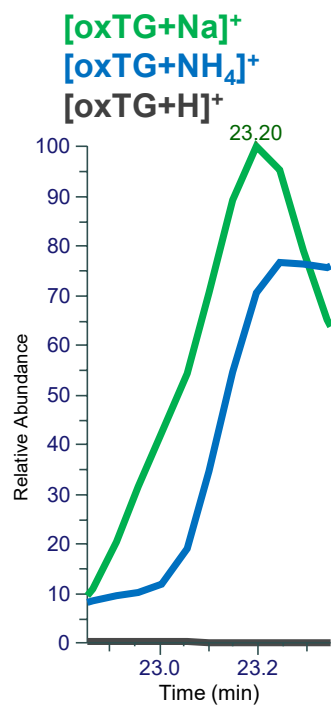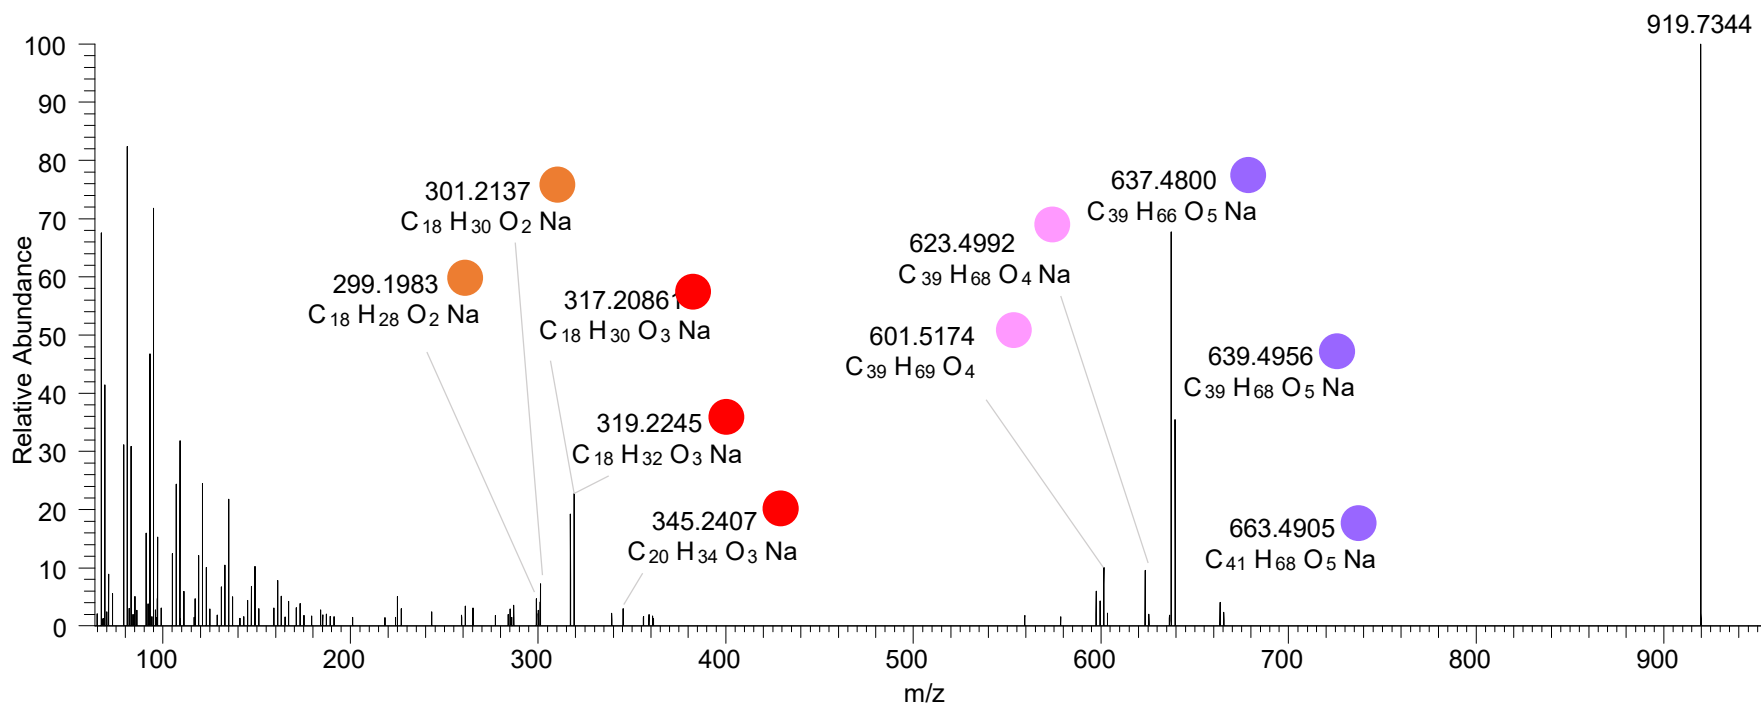

TG(18:1\_18:1\_18:3<OH>)  
TG(16:0\_18:1\_20:3<oxo>)  
RT 23.6

[oxTG+Na]<sup>+</sup>

XIC 919.7361 NL: 5.74E5

- Fragments containing oxFAs
- Fragments related to water loss
- Fragments not containing oxFAs
- Fragments related to other oxLPPs
- Position-specific fragments
- Fragments related to FA loss
- Fragments related to oxFA loss

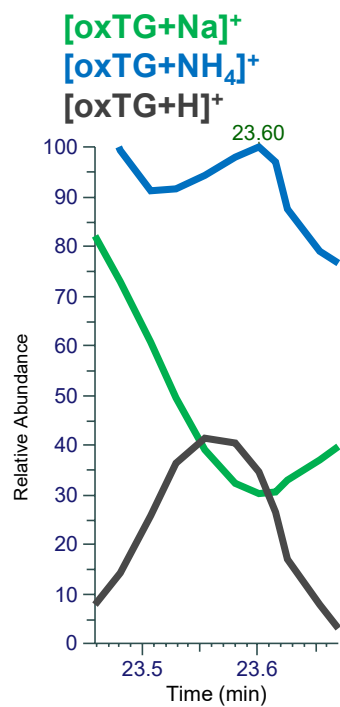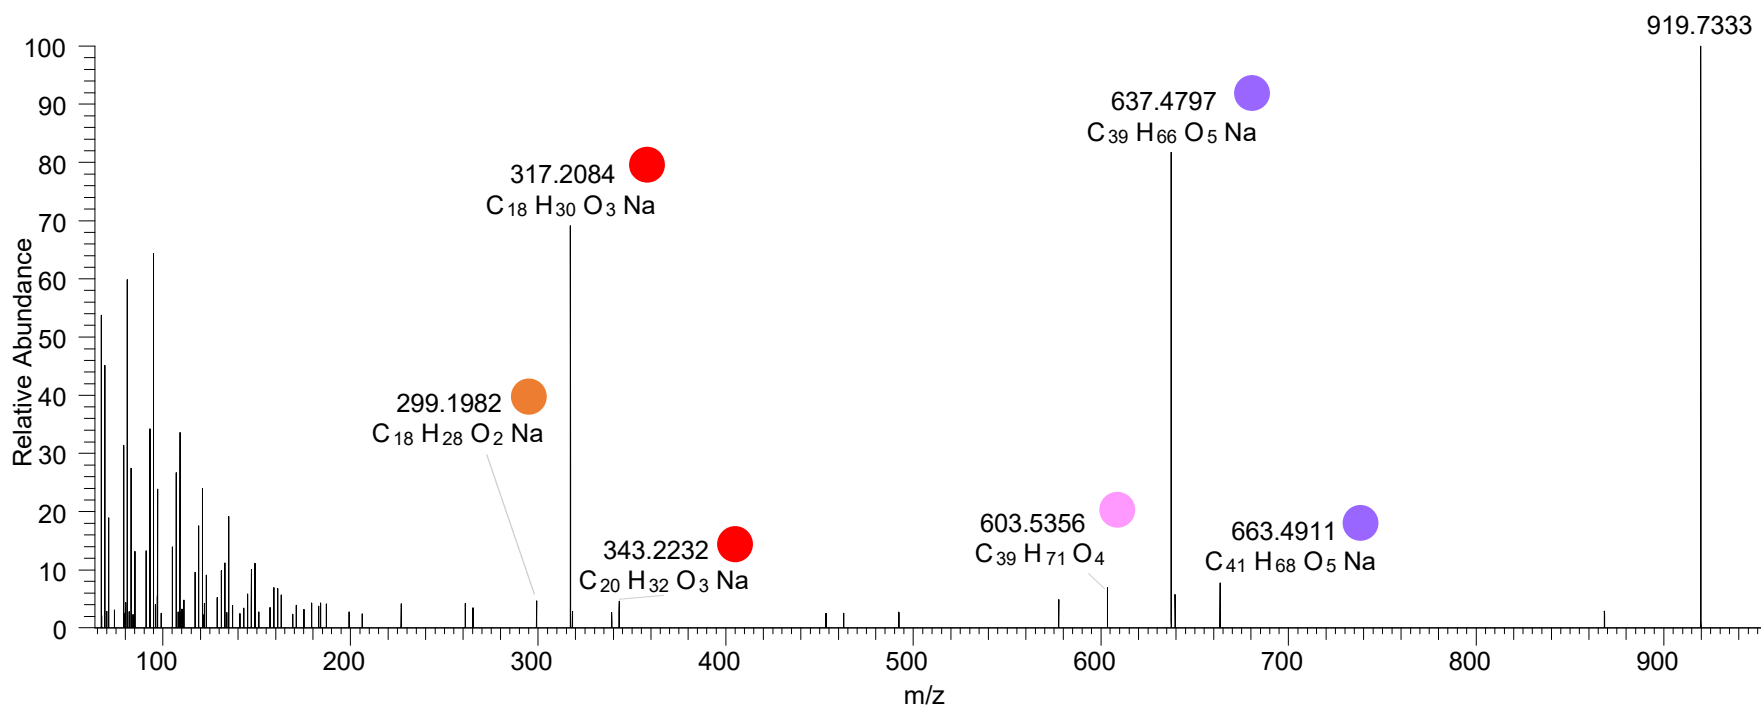



TG(18:1\_18:1\_18:3<OH>)  
TG(16:0\_18:1\_20:4<OH>)  
RT 24.0

[oxTG+Na]<sup>+</sup>

XIC 919.7361 NL: 8.25E5

- Fragments containing oxFAs
- Fragments related to water loss
- Fragments not containing oxFAs
- Fragments related to other oxLPPs
- Position-specific fragments
- Fragments related to FA loss
- Fragments related to oxFA loss

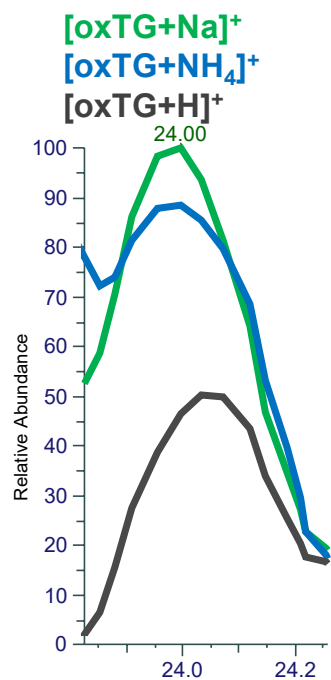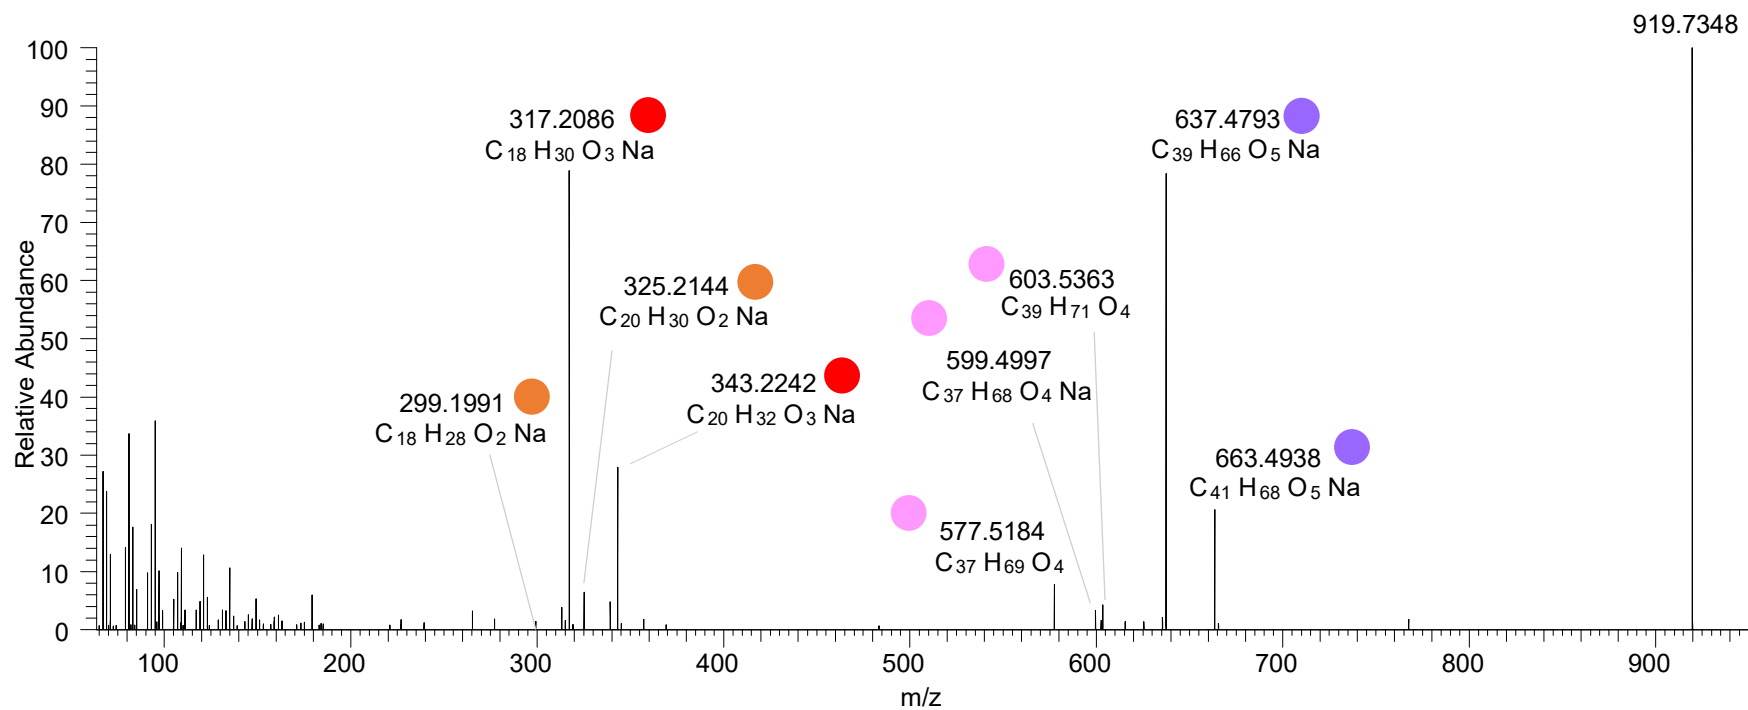

# TG(18:1\_18:1\_18:2<ep>)

RT 25.4

[oxTG+Na]<sup>+</sup>

XIC 919.7361 NL: 1.17E5

- Fragments containing oxFAs
- Fragments related to water loss
- Fragments not containing oxFAs
- Fragments related to other oxLPPs
- Position-specific fragments
- Fragments related to FA loss
- Fragments related to oxFA loss

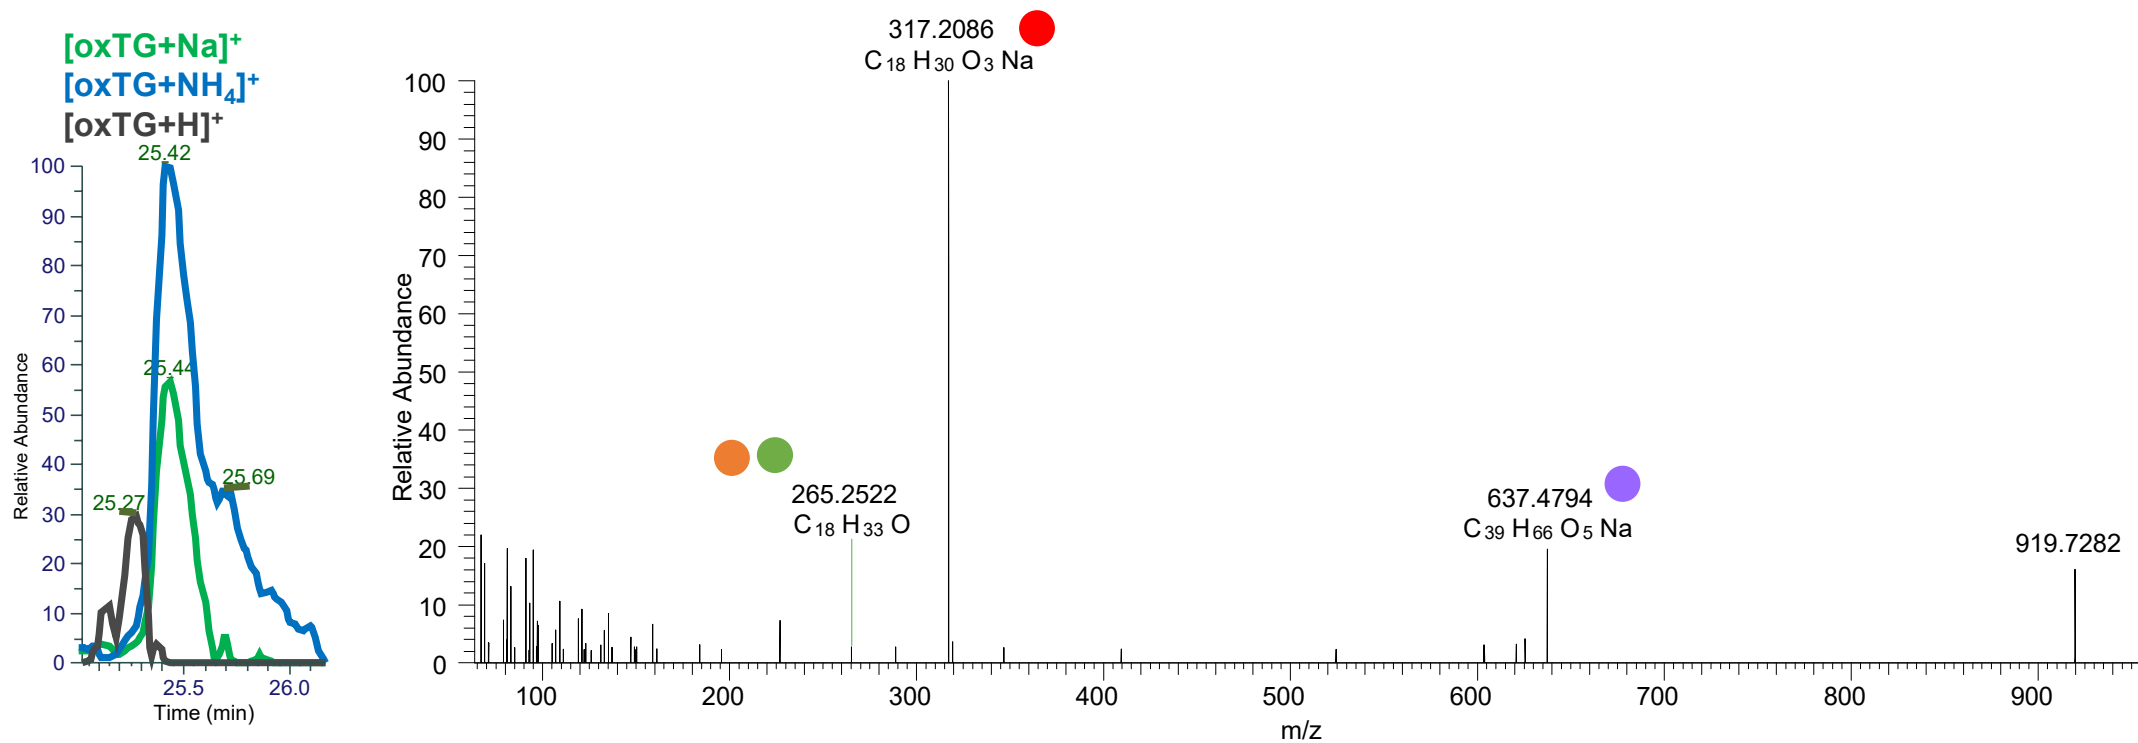

TG(18:1\_18:1\_18:2<OH>)  
TG(18:0\_18:1\_18:3<OH>)  
RT 23.4

[oxTG+Na]<sup>+</sup>

XIC 921.7517 NL: 4.46E5

- Fragments containing oxFAs
- Fragments related to water loss
- Fragments not containing oxFAs
- Fragments related to other oxLPPs
- Position-specific fragments
- Fragments related to FA loss
- Fragments related to oxFA loss

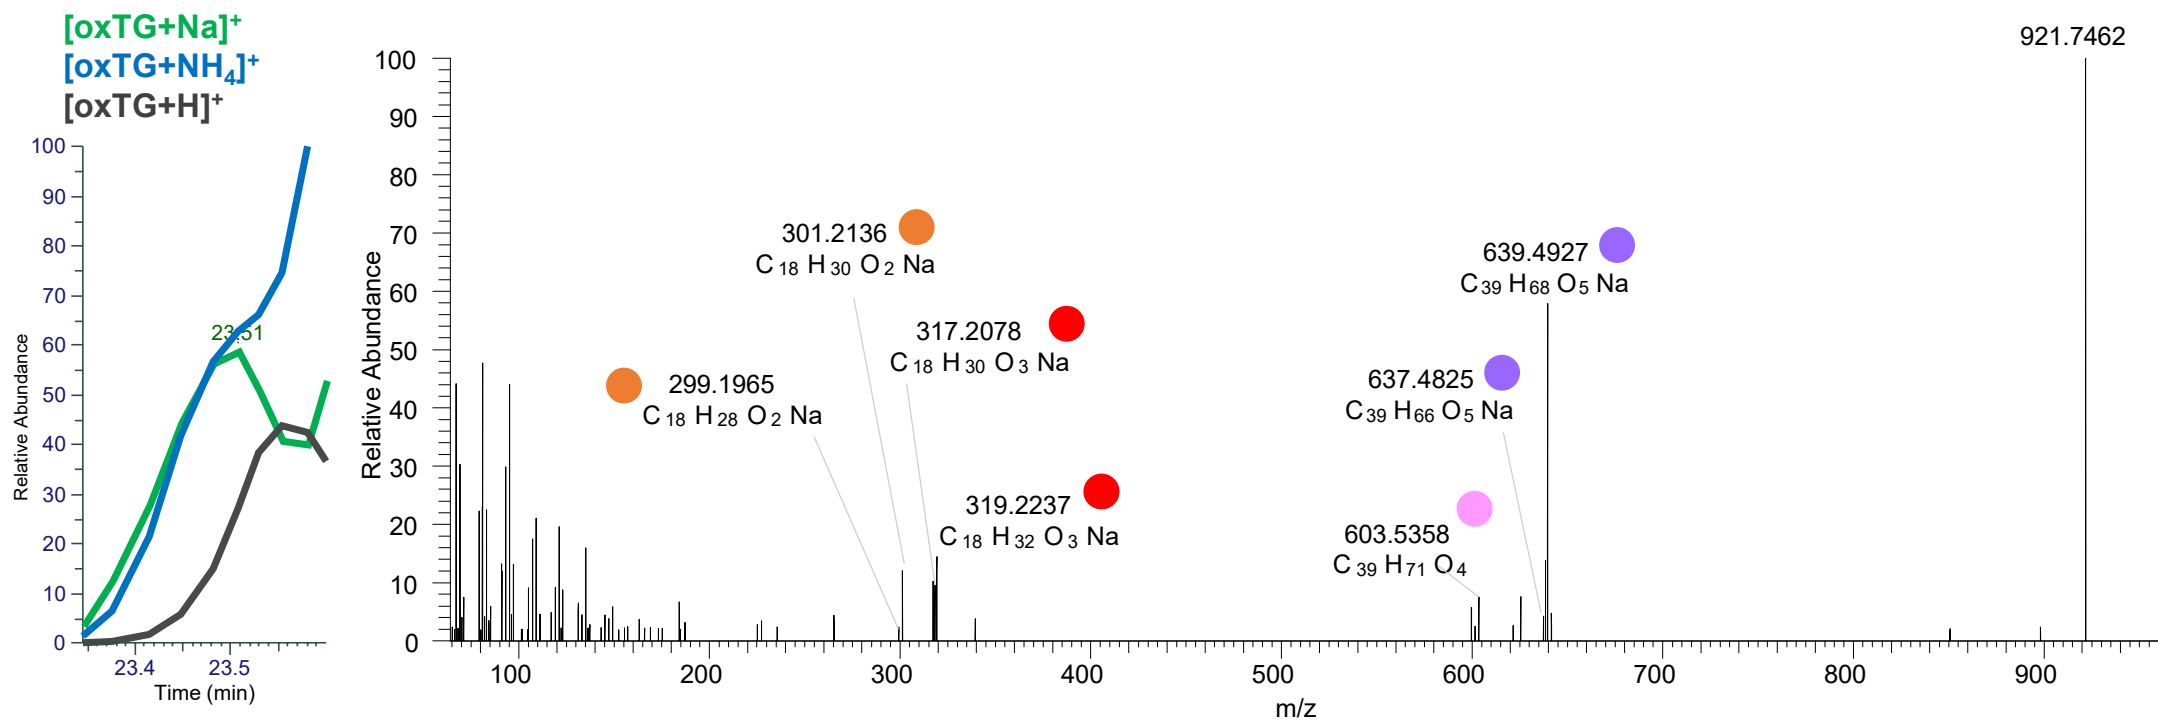

# TG(18:1\_18:1\_18:2<OH>)

RT 23.7

[oxTG+Na]<sup>+</sup> XIC 921.7517 NL: 2.21E6

- Fragments containing oxFAs
- Fragments related to water loss
- Fragments not containing oxFAs
- Fragments related to other oxLPPs
- Position-specific fragments
- Fragments related to FA loss
- Fragments related to oxFA loss

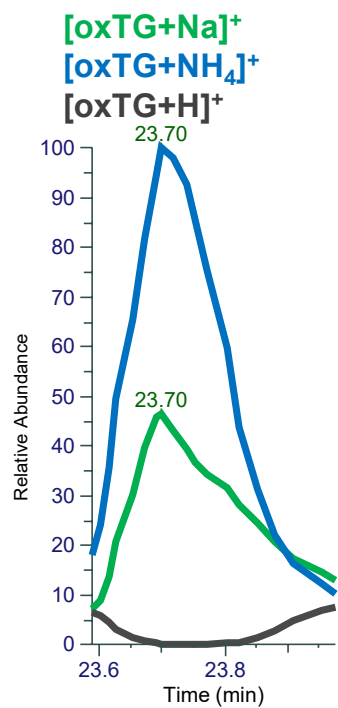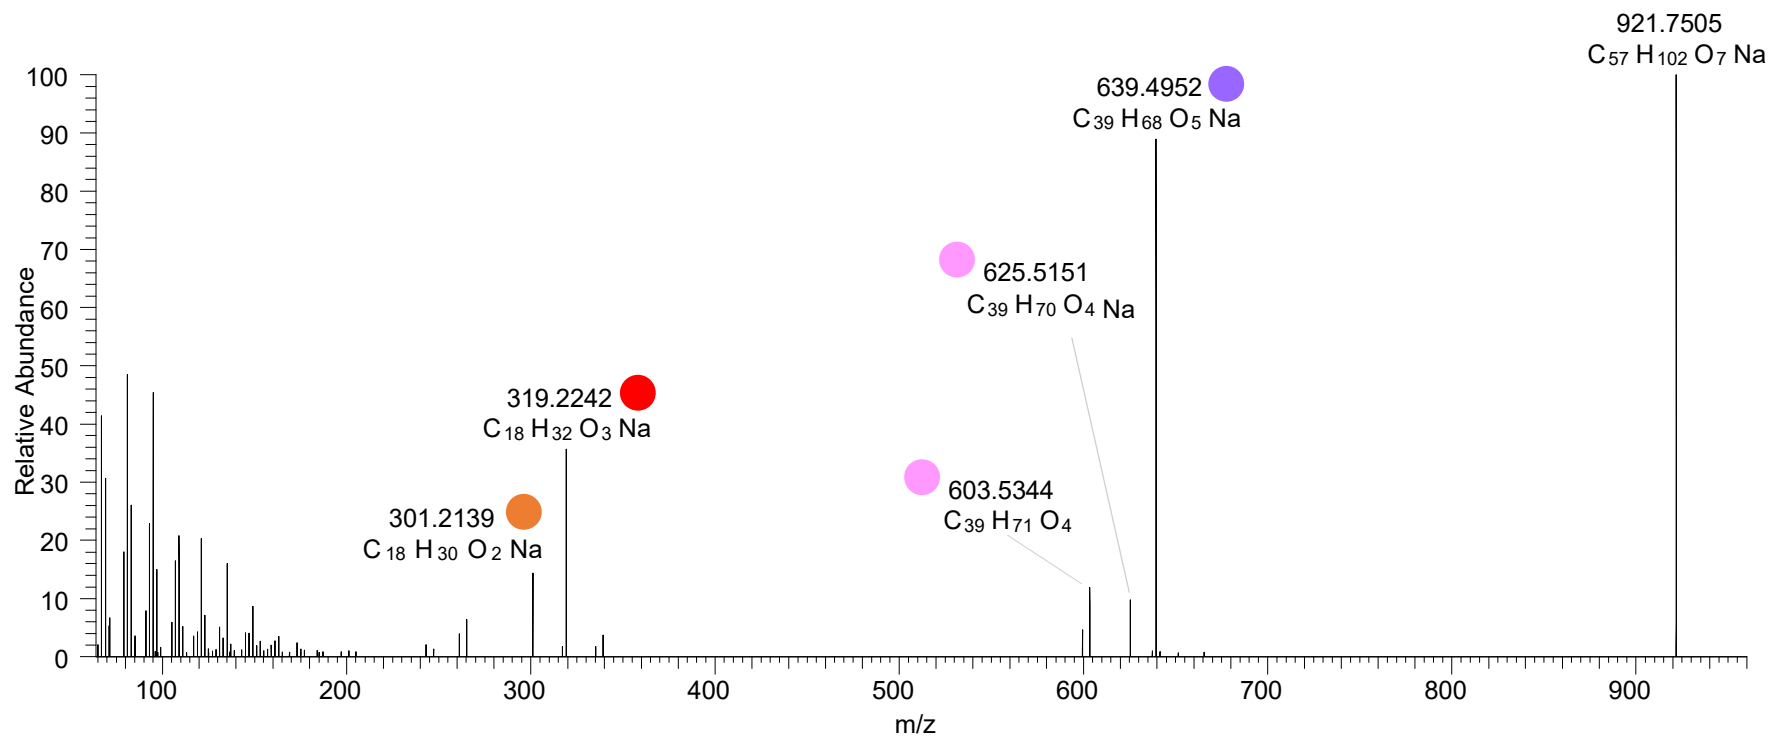

TG(18:0\_18:2\_18:2<OH>)  
 TG(16:0\_18:1\_20:3<OH>)  
 RT 23.7

[oxTG+Na]<sup>+</sup>

XIC 921.7517 NL: 2.21E6

- Fragments containing oxFAs
- Fragments related to water loss
- Fragments not containing oxFAs
- Fragments related to other oxLPPs
- Position-specific fragments
- Fragments related to FA loss
- Fragments related to oxFA loss

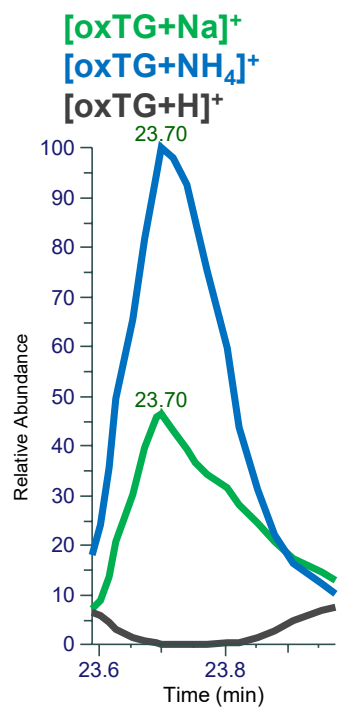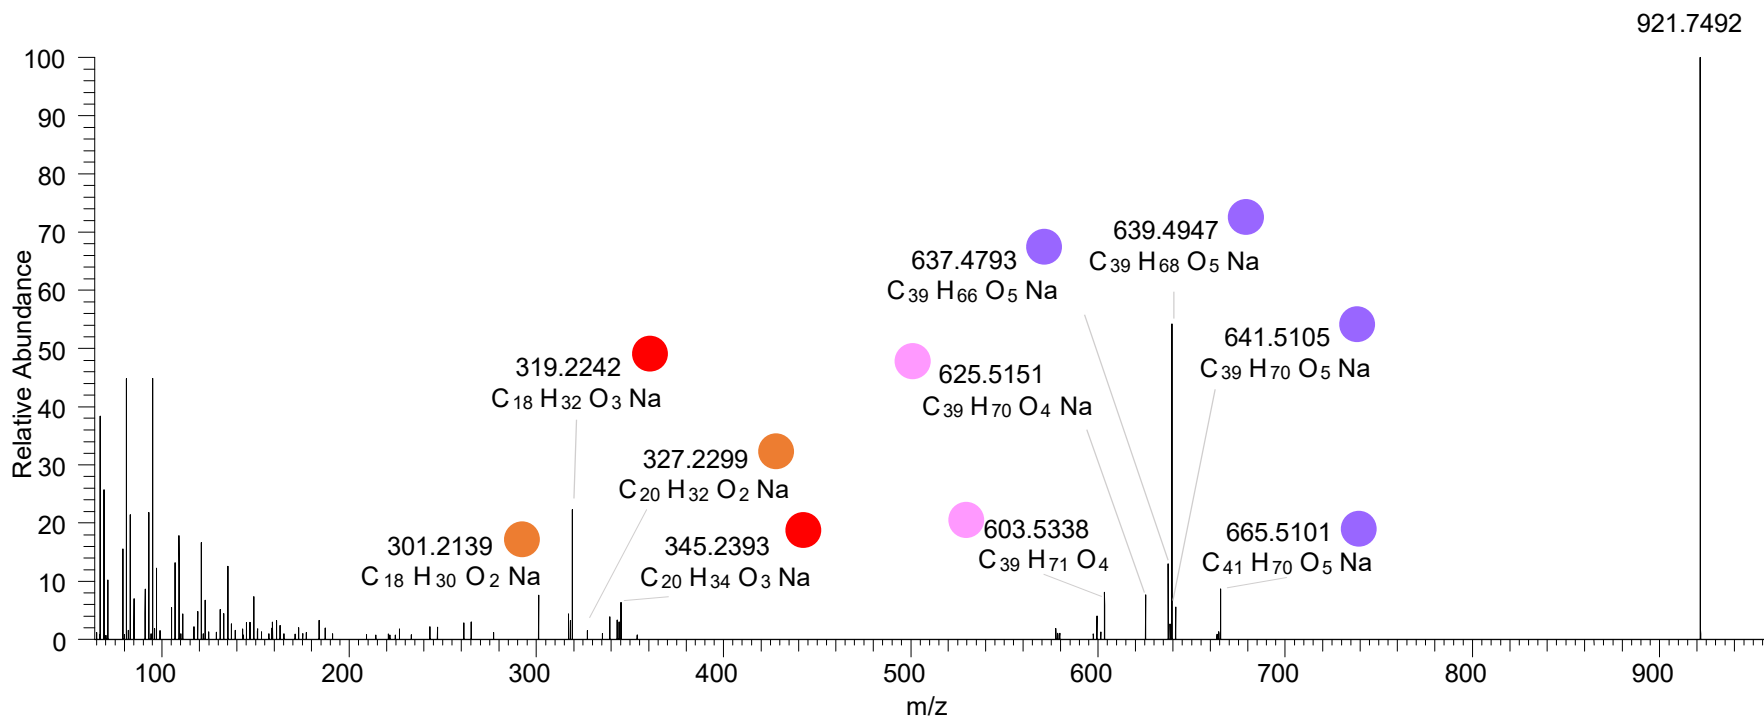

TG(18:1\_18:1\_18:2<O>)  
TG(18:0\_18:1\_18:3<O>)  
RT 24.9

[oxTG+Na]<sup>+</sup>

XIC 921.7517 NL: 1.38E5

- Fragments containing oxFAs
- Fragments related to water loss
- Fragments not containing oxFAs
- Fragments related to other oxLPPs
- Position-specific fragments
- Fragments related to FA loss
- Fragments related to oxFA loss

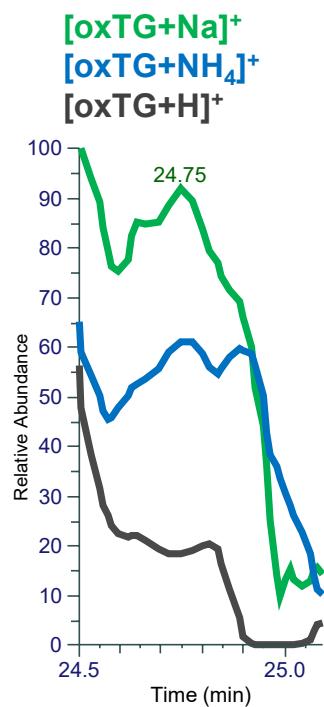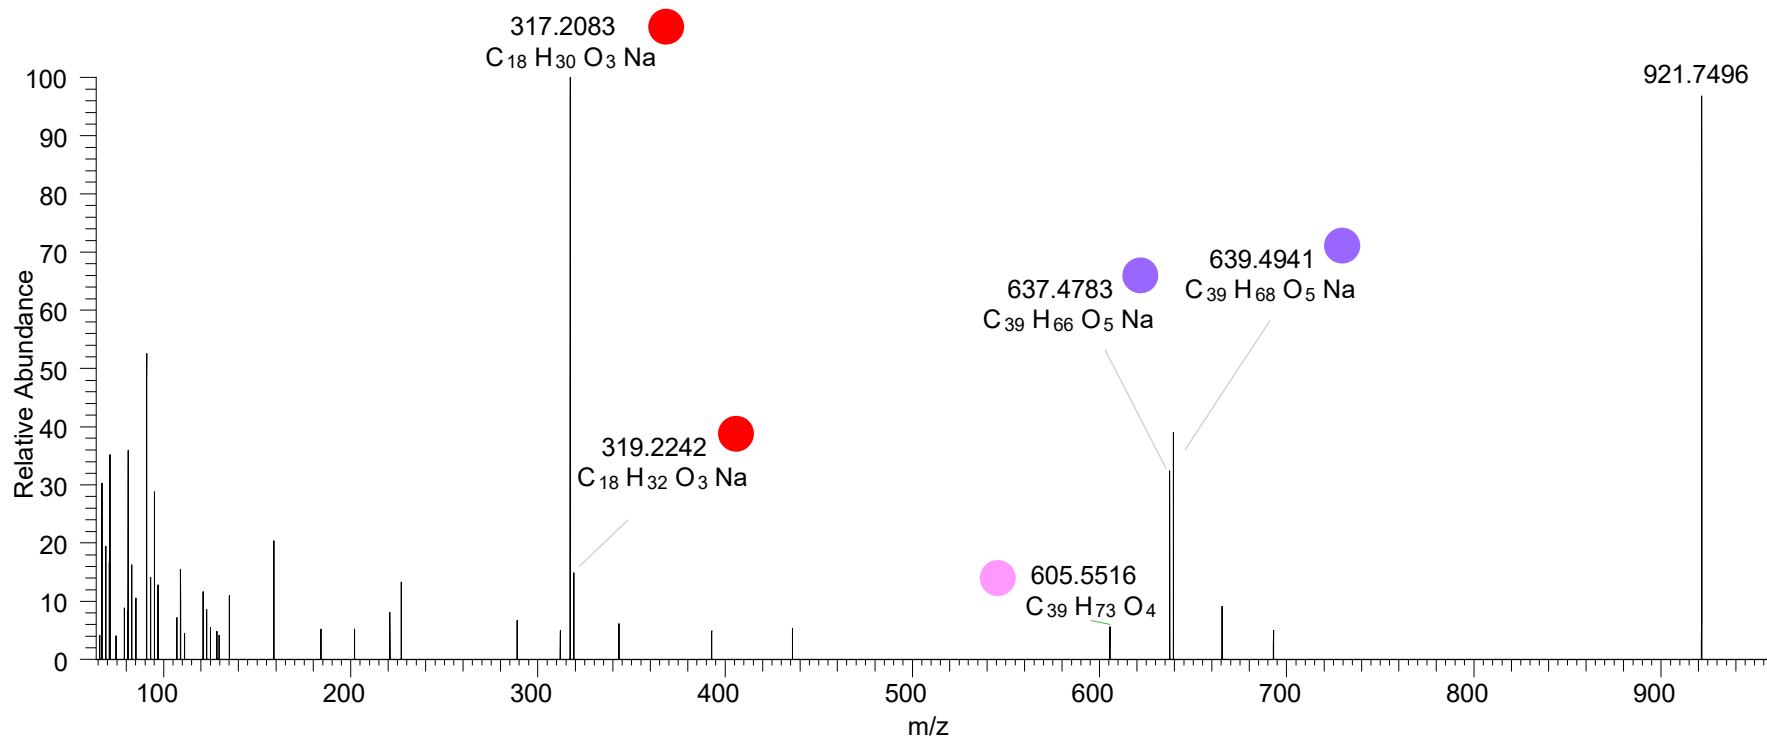

# TG(16:0\_18:1\_18:3<3O>)

## RT 21.8

[oxTG+Na]<sup>+</sup>

XIC 925.7103 NL: 4.70E4

- Fragments containing oxFAs
- Fragments related to water loss
- Fragments not containing oxFAs
- Fragments related to other oxLPPs
- Position-specific fragments
- Fragments related to FA loss
- Fragments related to oxFA loss

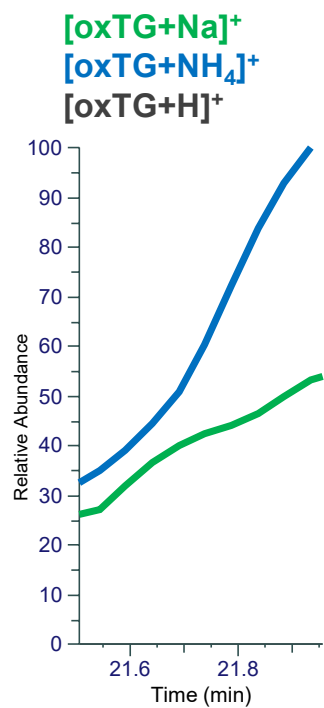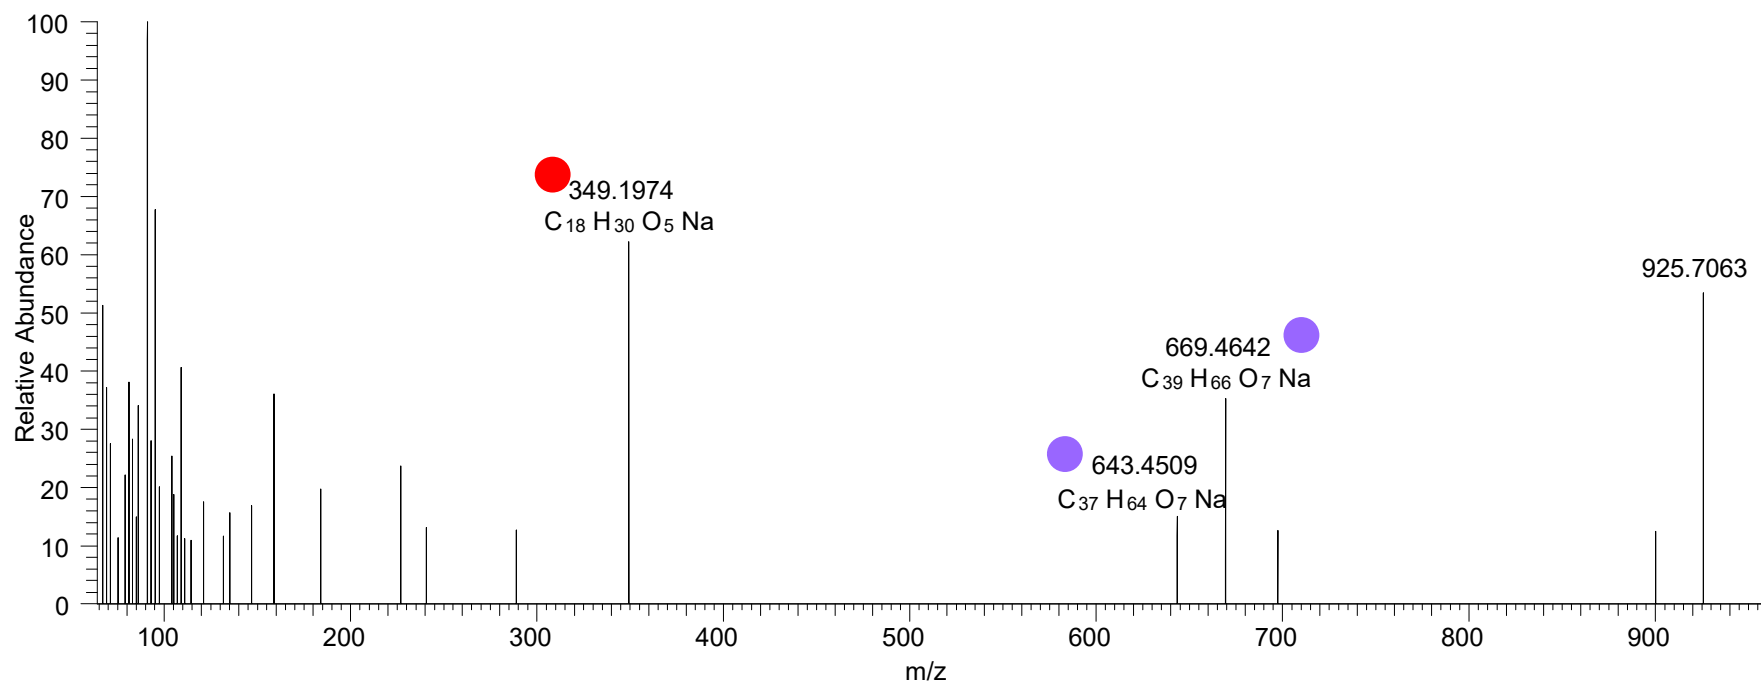

# TG(16:0\_18:1\_18:3<3O>)

RT 23.4

[oxTG+Na]<sup>+</sup>

XIC 925.7103 NL: 4.89E4

- Fragments containing oxFAs
- Fragments related to water loss
- Fragments not containing oxFAs
- Fragments related to other oxLPPs
- Position-specific fragments
- Fragments related to FA loss
- Fragments related to oxFA loss

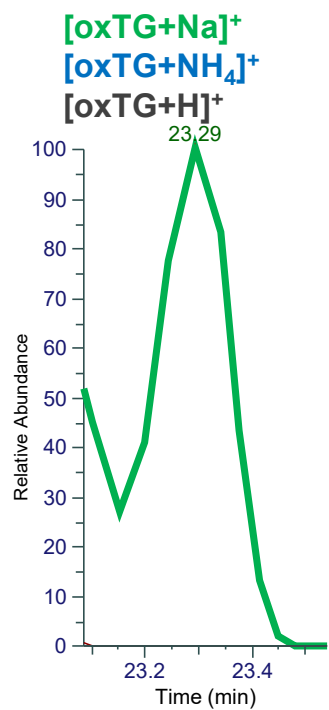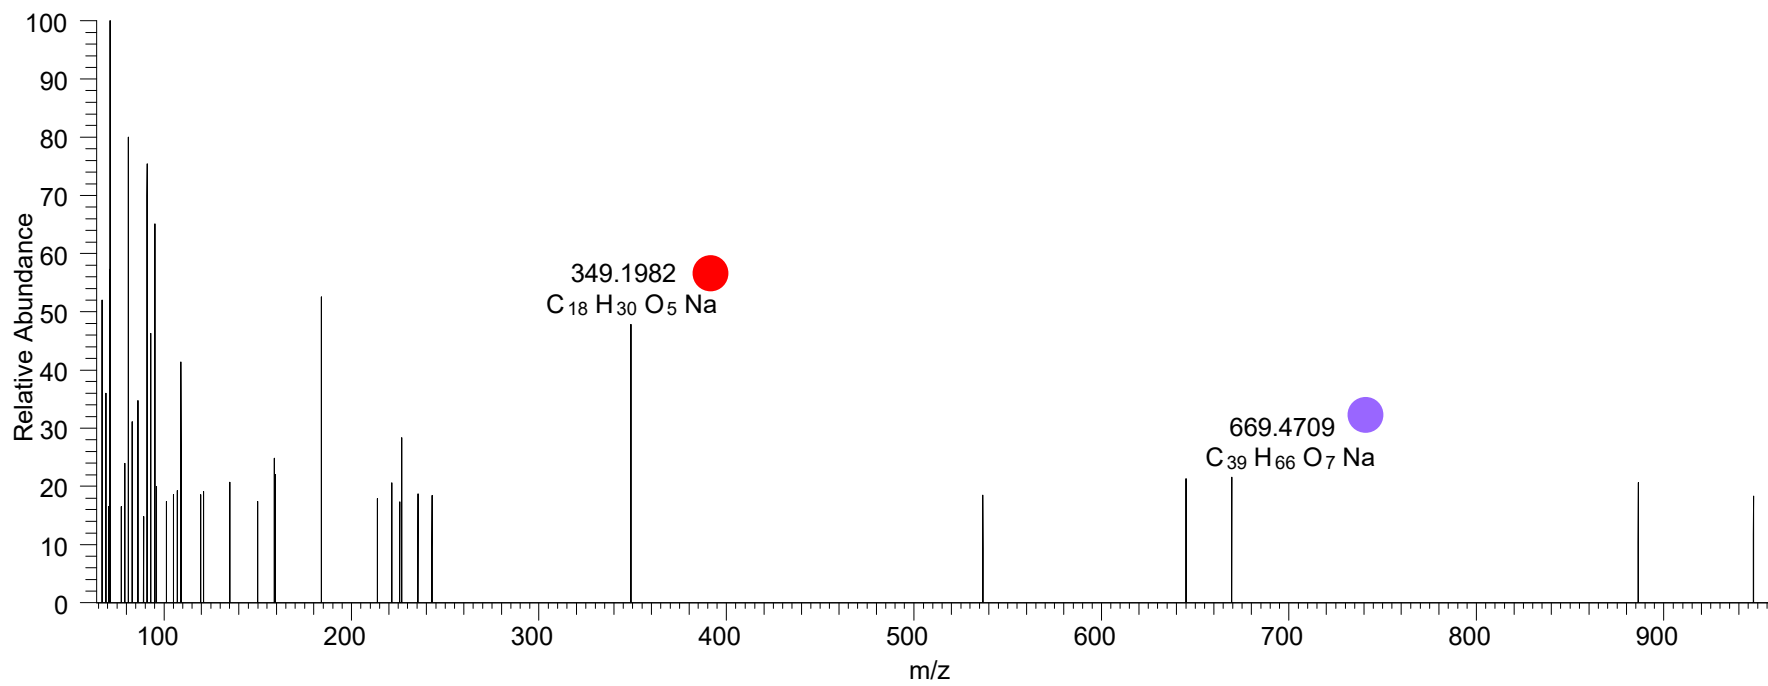



# TG(18:1\_18:2<O>\_18:3<O>)

## RT 20.6

[oxTG+Na]<sup>+</sup>

XIC 933.7154 NL: 1.13E5

- Fragments containing oxFAs
- Fragments related to water loss
- Fragments not containing oxFAs
- Fragments related to other oxLPPs
- Position-specific fragments
- Fragments related to FA loss
- Fragments related to oxFA loss

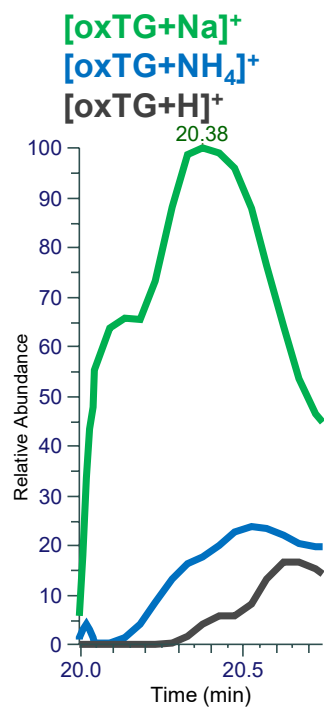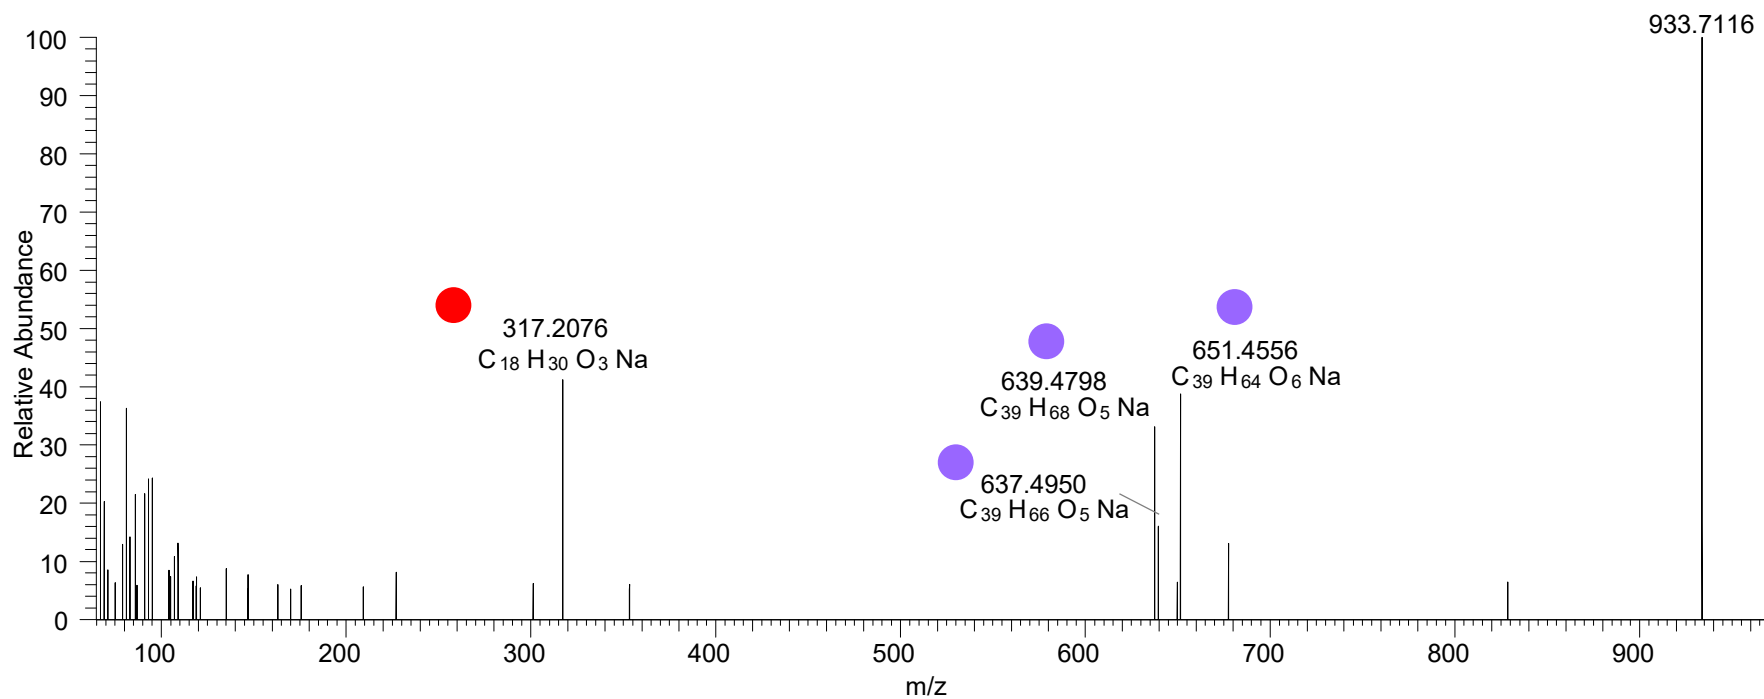

TG(16:1\_18:1\_20:4<OH,O>)  
TG(18:1\_18:2\_18:3<OH,O>)  
RT 21.0

[oxTG+Na]<sup>+</sup>

XIC 933.7154 NL: 1.69E5

- Fragments containing oxFAs
- Fragments related to water loss
- Fragments not containing oxFAs
- Fragments related to other oxLPPs
- Position-specific fragments
- Fragments related to FA loss
- Fragments related to oxFA loss

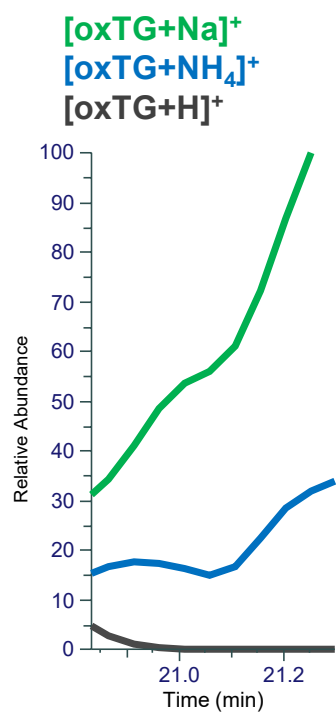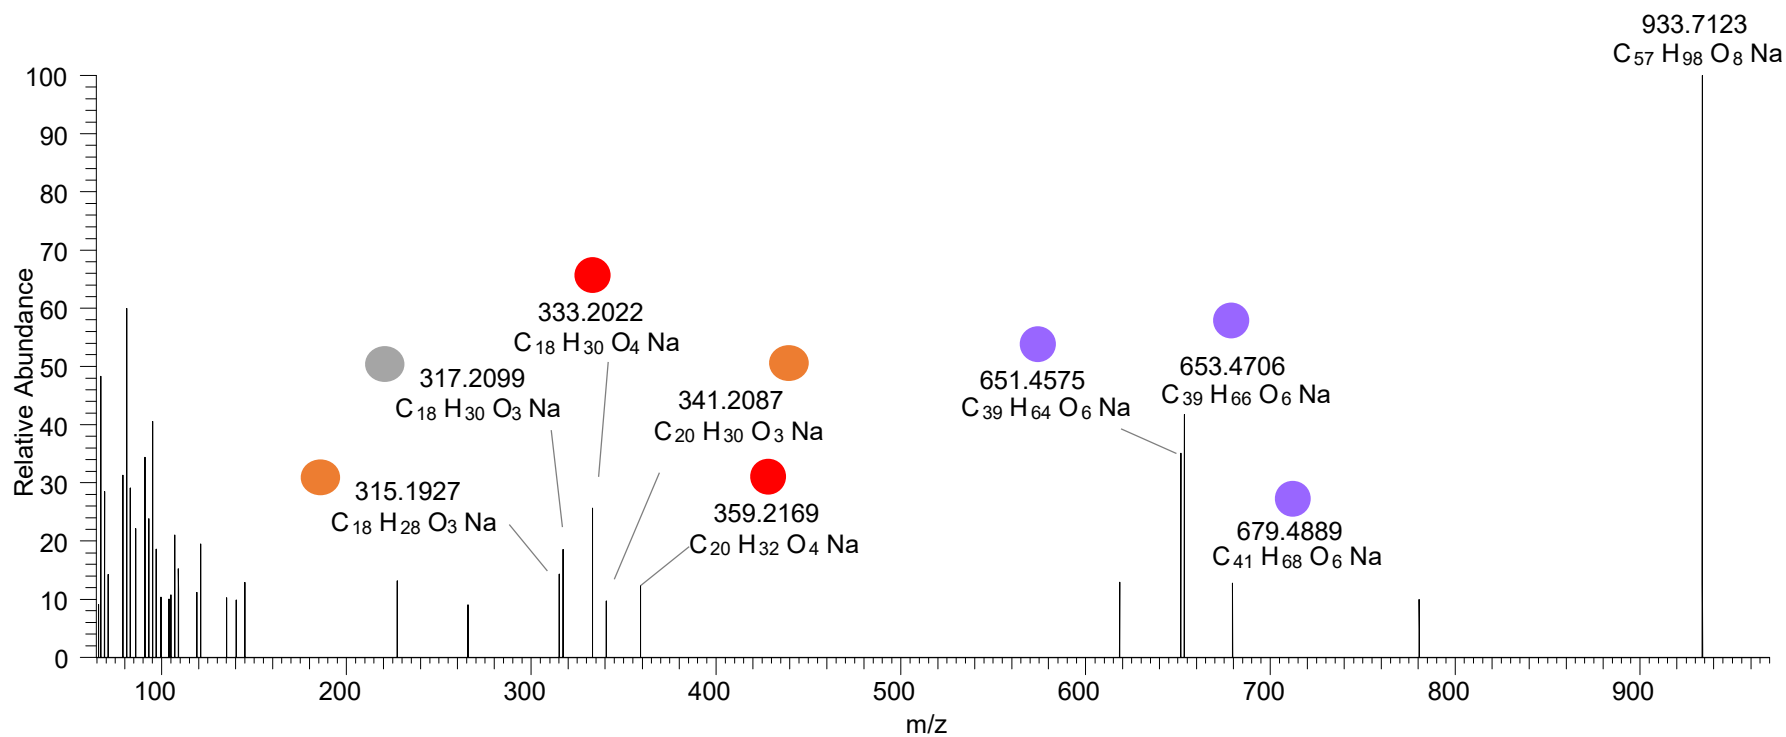

TG(16:1\_18:1\_20:4<OH,O>)  
 TG(18:2\_18:2\_18:2<2O>)  
 TG(18:1\_18:2\_18:3<OH,O>)  
 TG(18:1\_18:1\_18:4<2O>)  
 TG(16:0\_16:1\_22:5<2O>) RT 21.2

[oxTG+Na]<sup>+</sup>

XIC 933.7154 NL: 1.69E5

- Fragments containing oxFAs
- Fragments related to water loss
- Fragments not containing oxFAs
- Fragments related to other oxLPPs
- Position-specific fragments
- Fragments related to FA loss
- Fragments related to oxFA loss

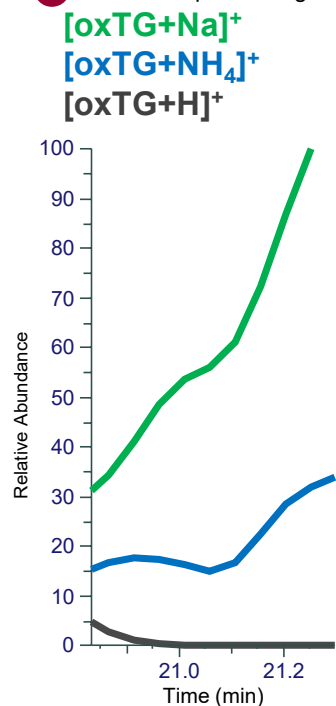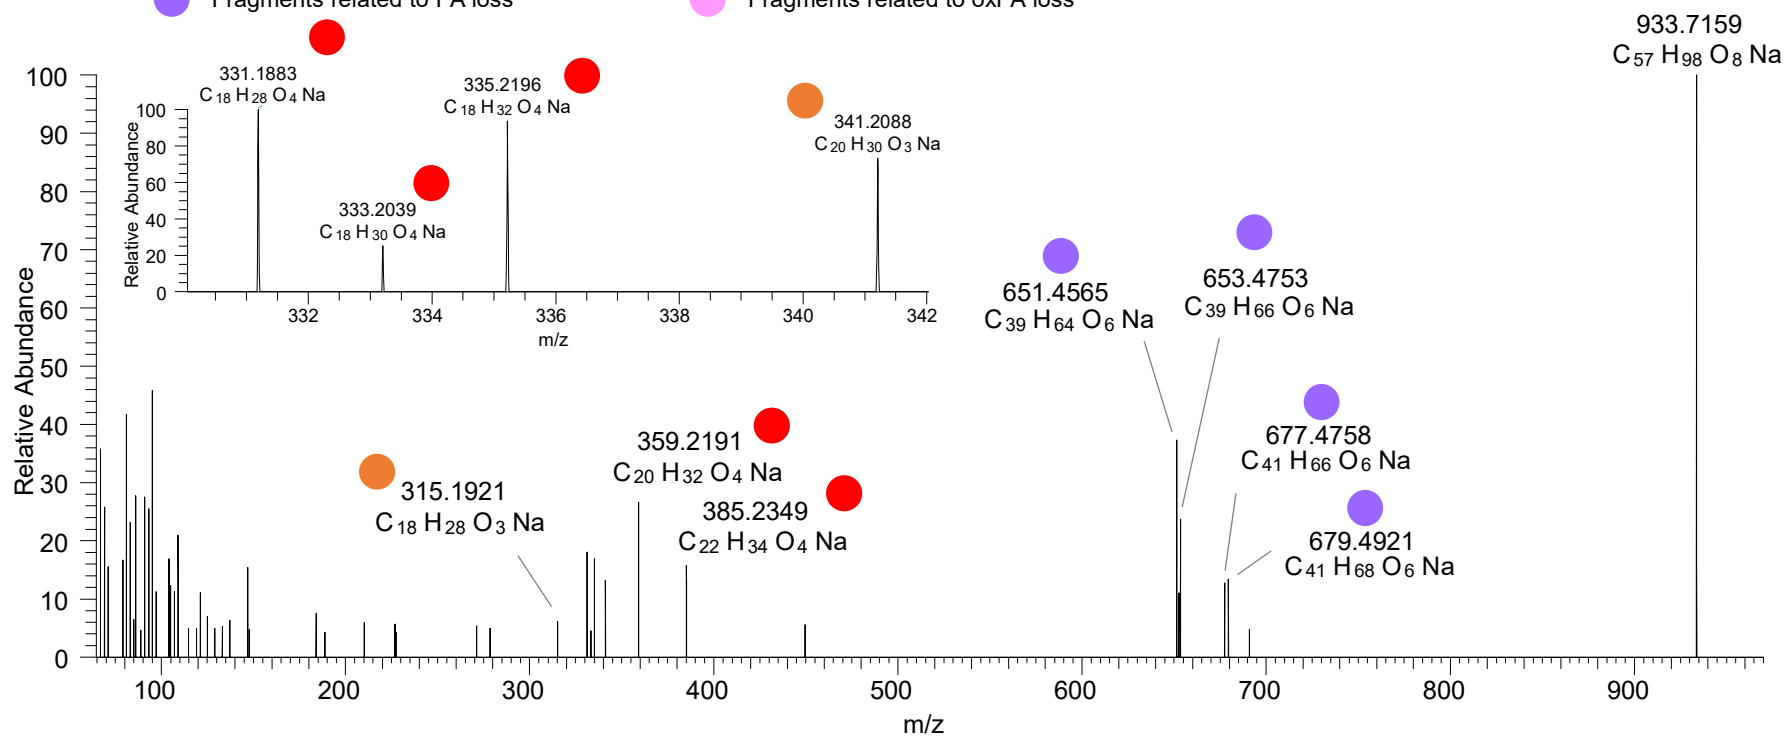

TG(16:0\_18:1\_20:5<OH,O>)  
 TG(16:1\_18:1\_20:4<OH,O>)  
 TG(16:0\_18:2\_20:4<OH,O>)  
 TG(18:1\_18:1\_18:4<2O>)  
 TG(18:1\_18:2\_18:3<2O>)  
 TG(18:1\_18:3\_18:2<OH,O>) RT 21.7

[oxTG+Na]<sup>+</sup>

XIC 933.7154 NL: 2.41E5

- Fragments containing oxFAs
- Fragments related to water loss
- Fragments not containing oxFAs
- Fragments related to other oxLPPs
- Position-specific fragments
- Fragments related to FA loss
- Fragments related to oxFA loss

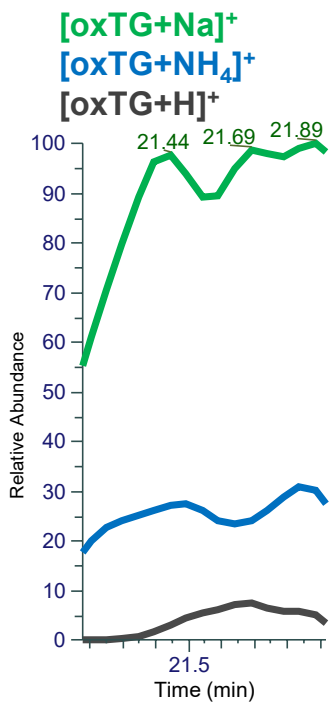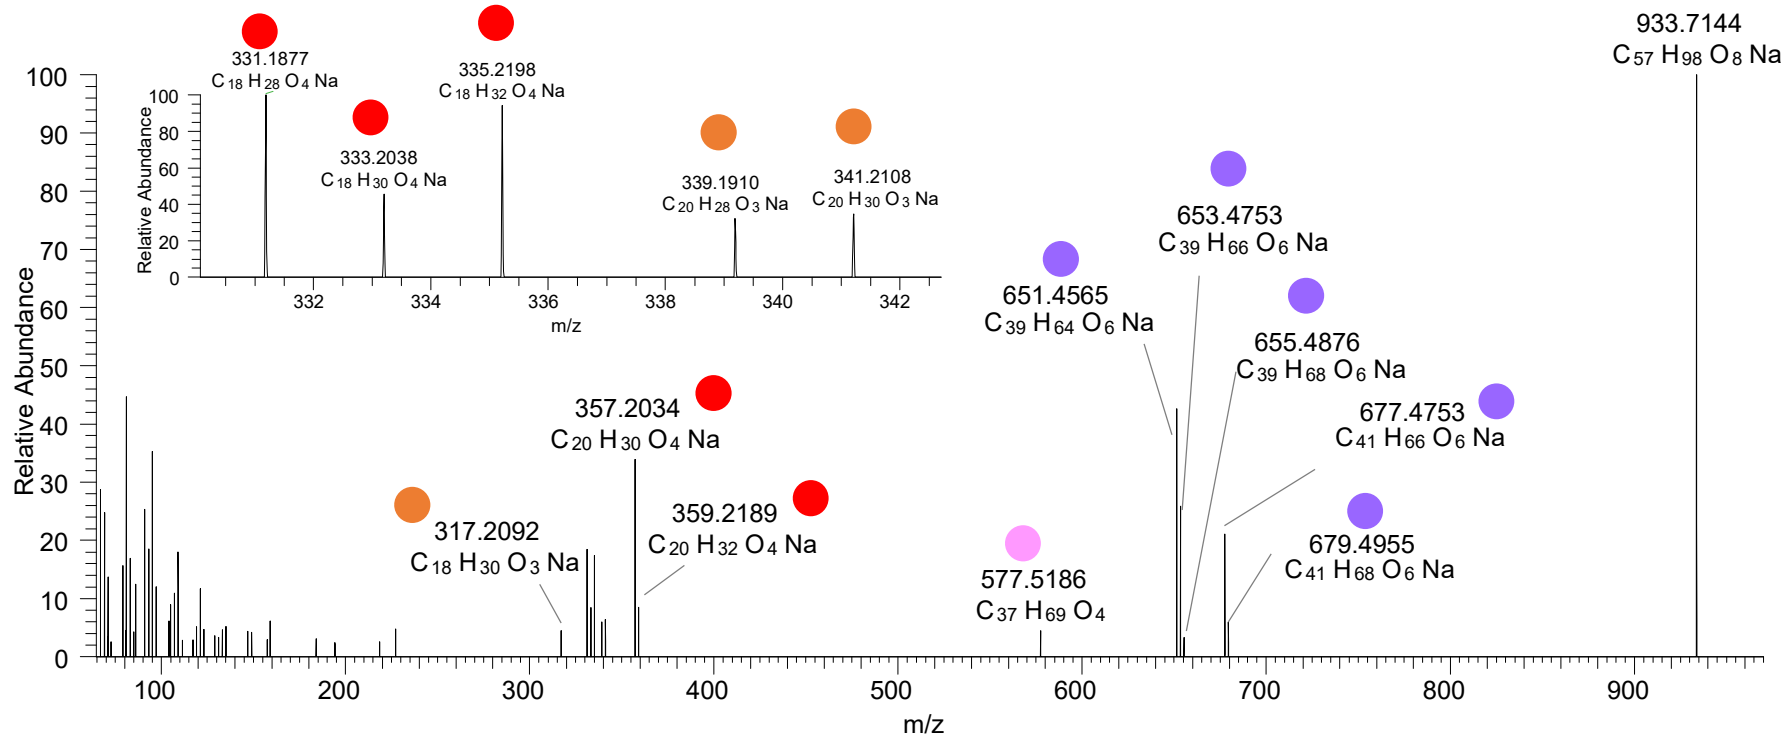

# TG(18:2\_18:2\_18:2<OOH{13}>)

## RT 22.5

[oxTG+Na]<sup>+</sup>

XIC 933.7154 NL: 5.39E5

- Fragments containing oxFAs
- Fragments related to water loss
- Fragments not containing oxFAs
- Fragments related to other oxLPPs
- Position-specific fragments
- Fragments related to FA loss
- Fragments related to oxFA loss

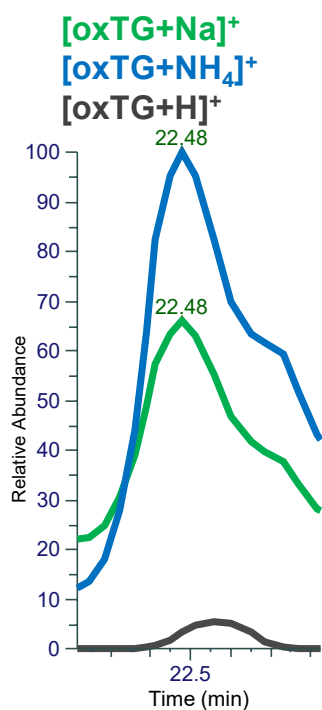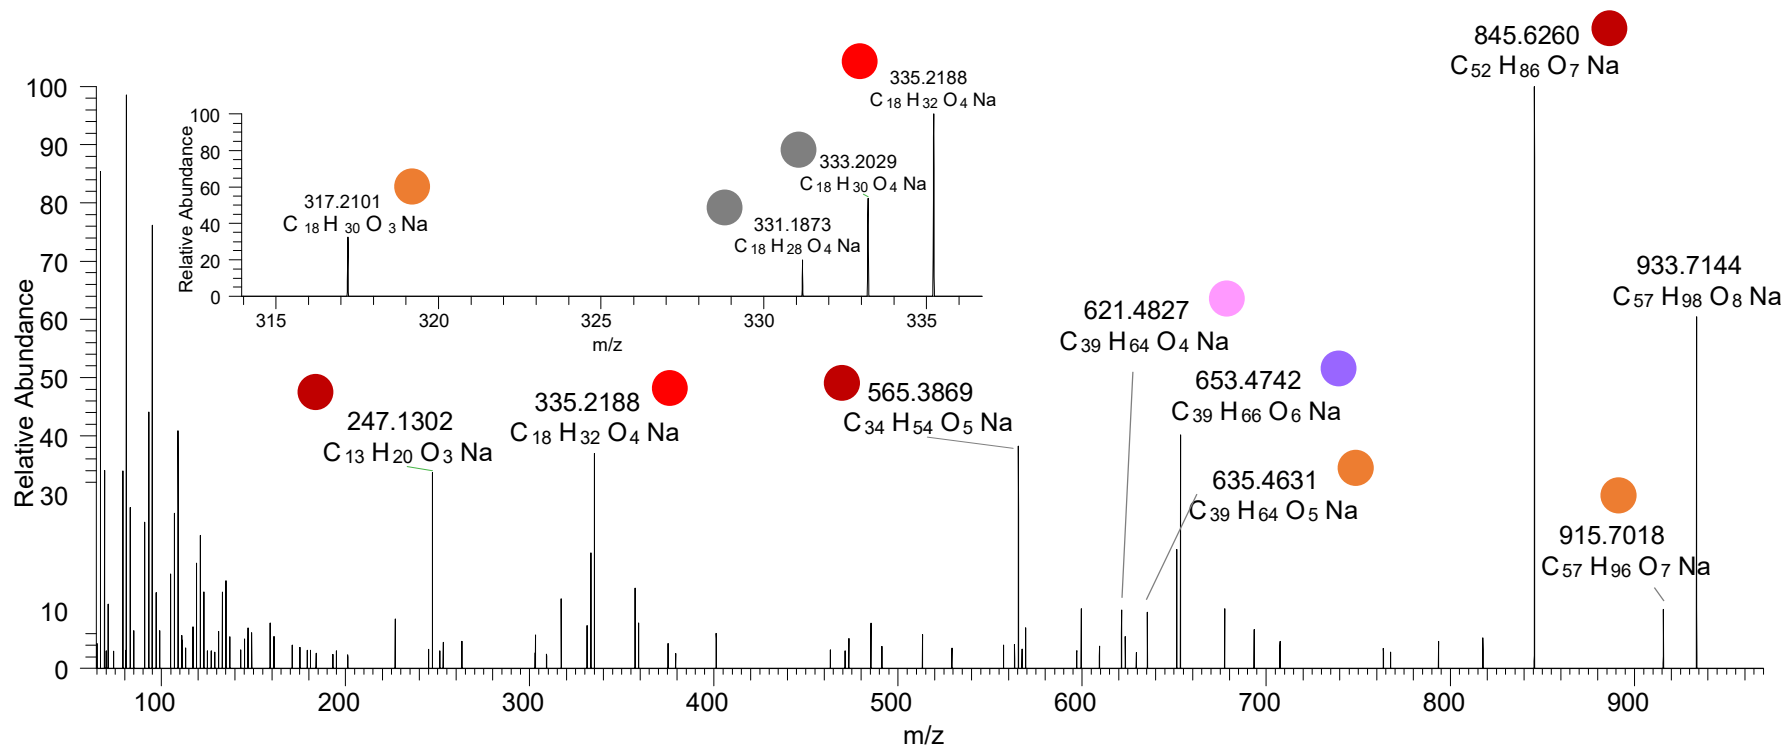

TG(18:2\_18:2\_18:2<OOH{13}>)  
 TG(18:1\_18:2\_18:3<OOH{16}>)  
 TG(18:1\_18:1\_18:4<OH,O>)  
 RT 22.6

[oxTG+Na]<sup>+</sup>

XIC 933.7154 NL: 5.39E5

- Fragments containing oxFAs
- Fragments related to water loss
- Fragments not containing oxFAs
- Fragments related to other oxLPPs
- Position-specific fragments
- Fragments related to FA loss
- Fragments related to oxFA loss

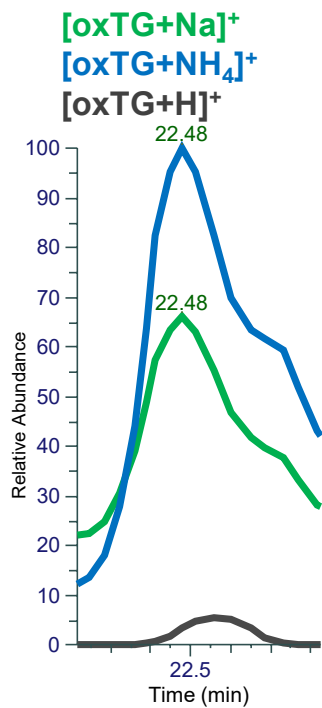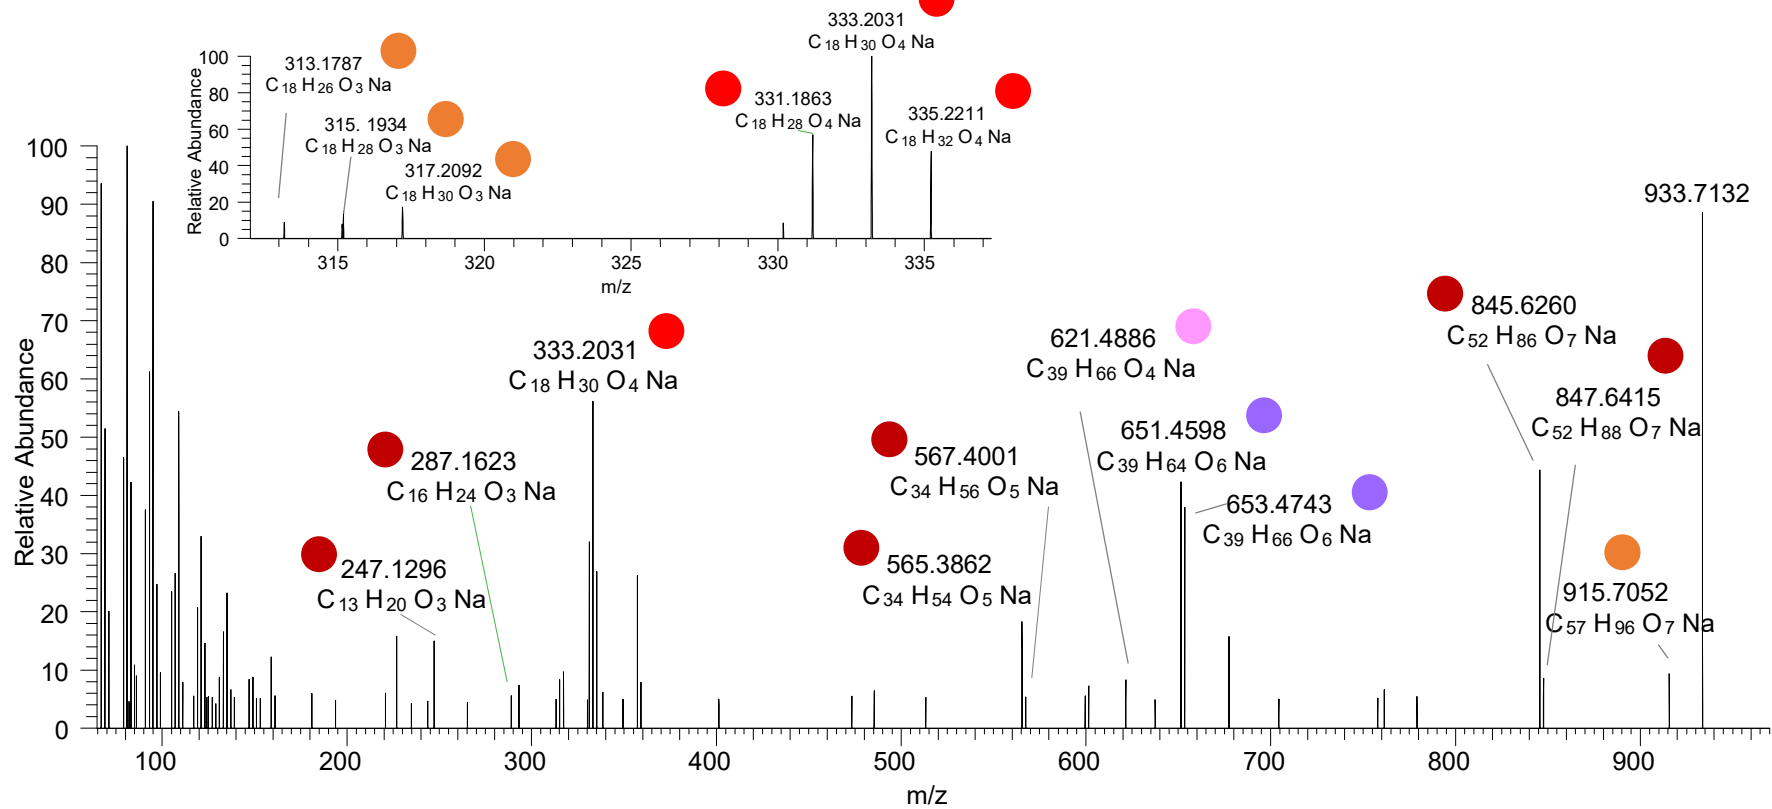

# TG(18:1\_18:2<OH>\_18:2<OH>)

## RT 20.2

[oxTG+Na]<sup>+</sup>

XIC 935.7310 NL: 3.20E5

- Fragments containing oxFAs
- Fragments related to water loss
- Fragments not containing oxFAs
- Fragments related to other oxLPPs
- Position-specific fragments
- Fragments related to FA loss
- Fragments related to oxFA loss

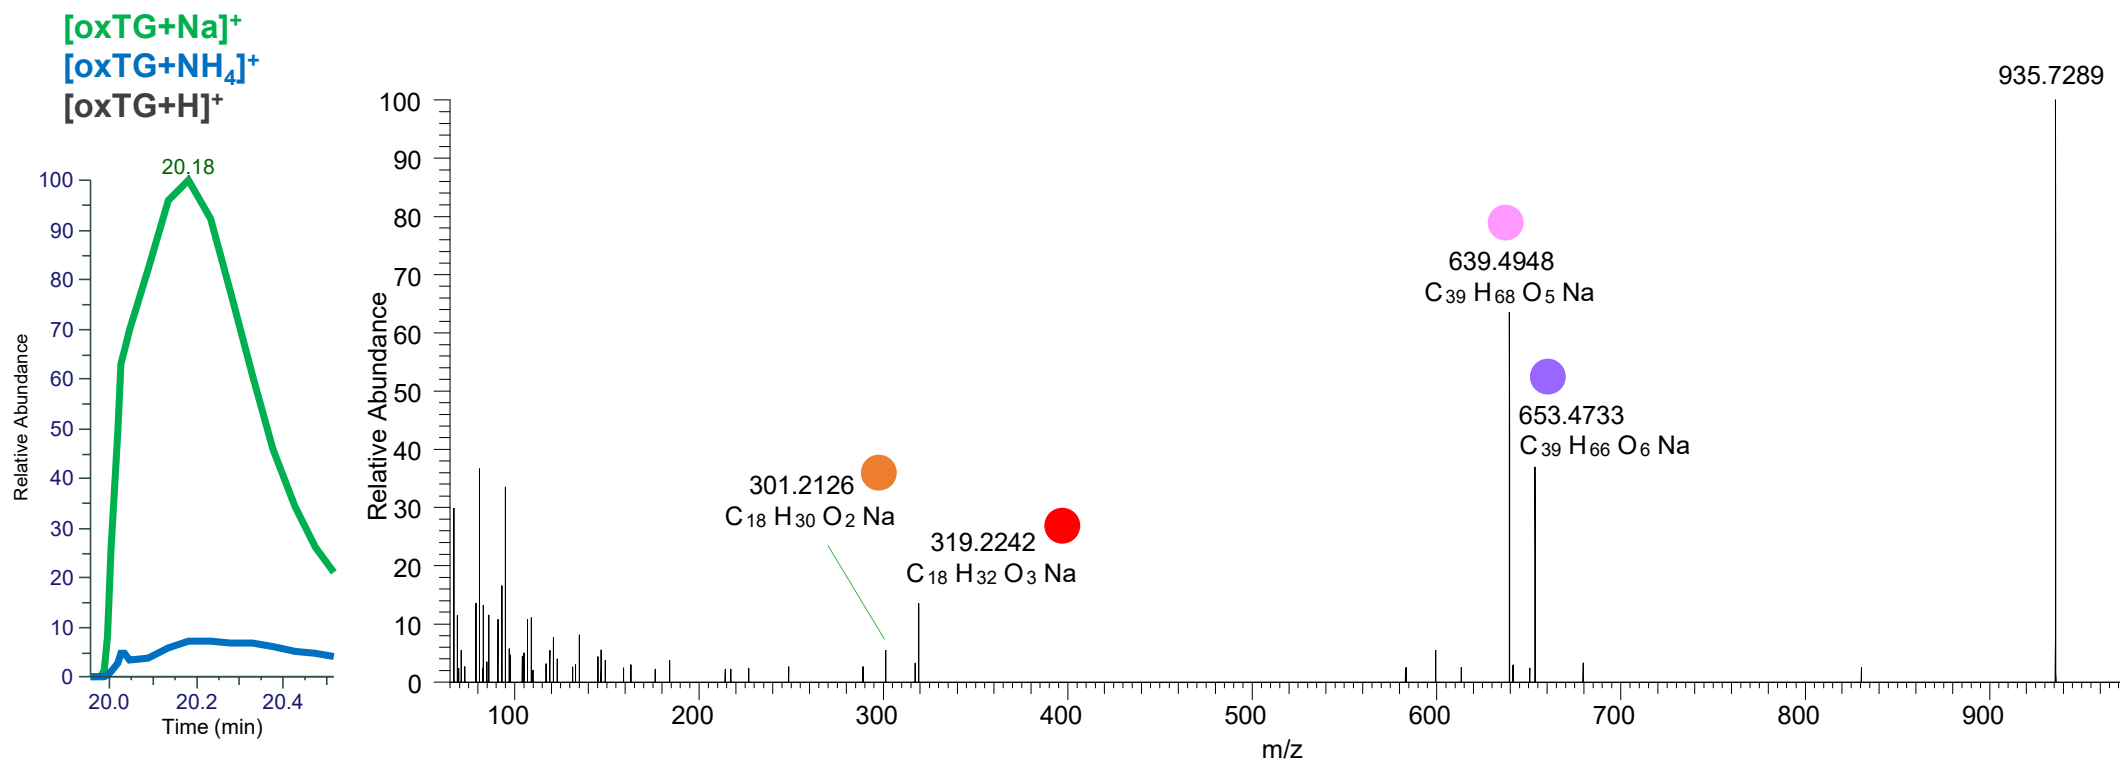

TG(16:0\_18:1\_20:4<OH,O>)  
 TG(18:1\_18:2\_18:2<2O>)  
 TG(18:1\_18:1\_18:3<OH,O>)  
 RT 22.2

[oxTG+Na]<sup>+</sup>

XIC 935.7310 NL: 2.72E6

- Fragments containing oxFAs
- Fragments related to water loss
- Fragments not containing oxFAs
- Fragments related to other oxLPPs
- Position-specific fragments
- Fragments related to FA loss
- Fragments related to oxFA loss

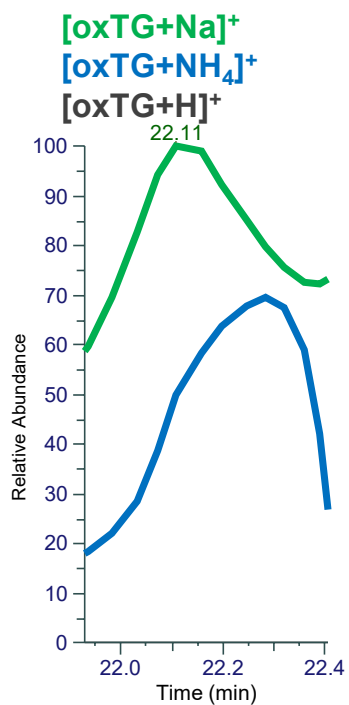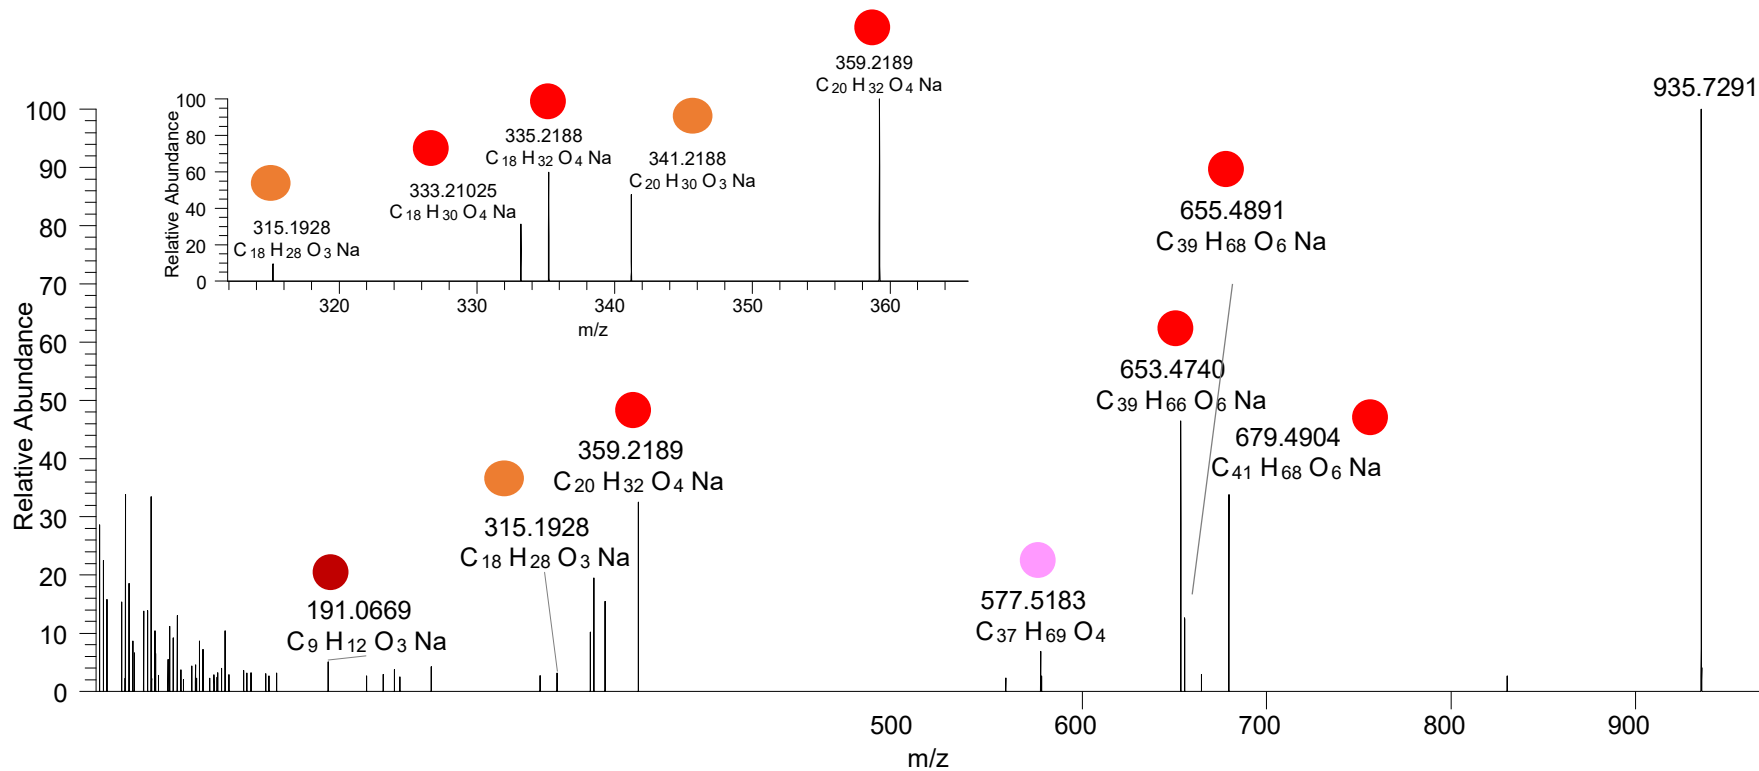



TG(18:1\_18:2\_18:2<OOH{13})  
 TG(18:1\_18:1\_18:3<2O>)  
 RT 23.1

[oxTG+Na]<sup>+</sup>

XIC 935.7310 NL: 1.45E6

- Fragments containing oxFAs
- Fragments related to water loss
- Fragments not containing oxFAs
- Fragments related to other oxLPPs
- Position-specific fragments
- Fragments related to FA loss
- Fragments related to oxFA loss

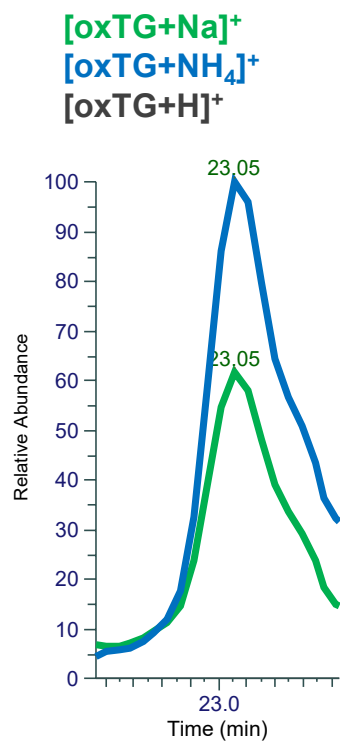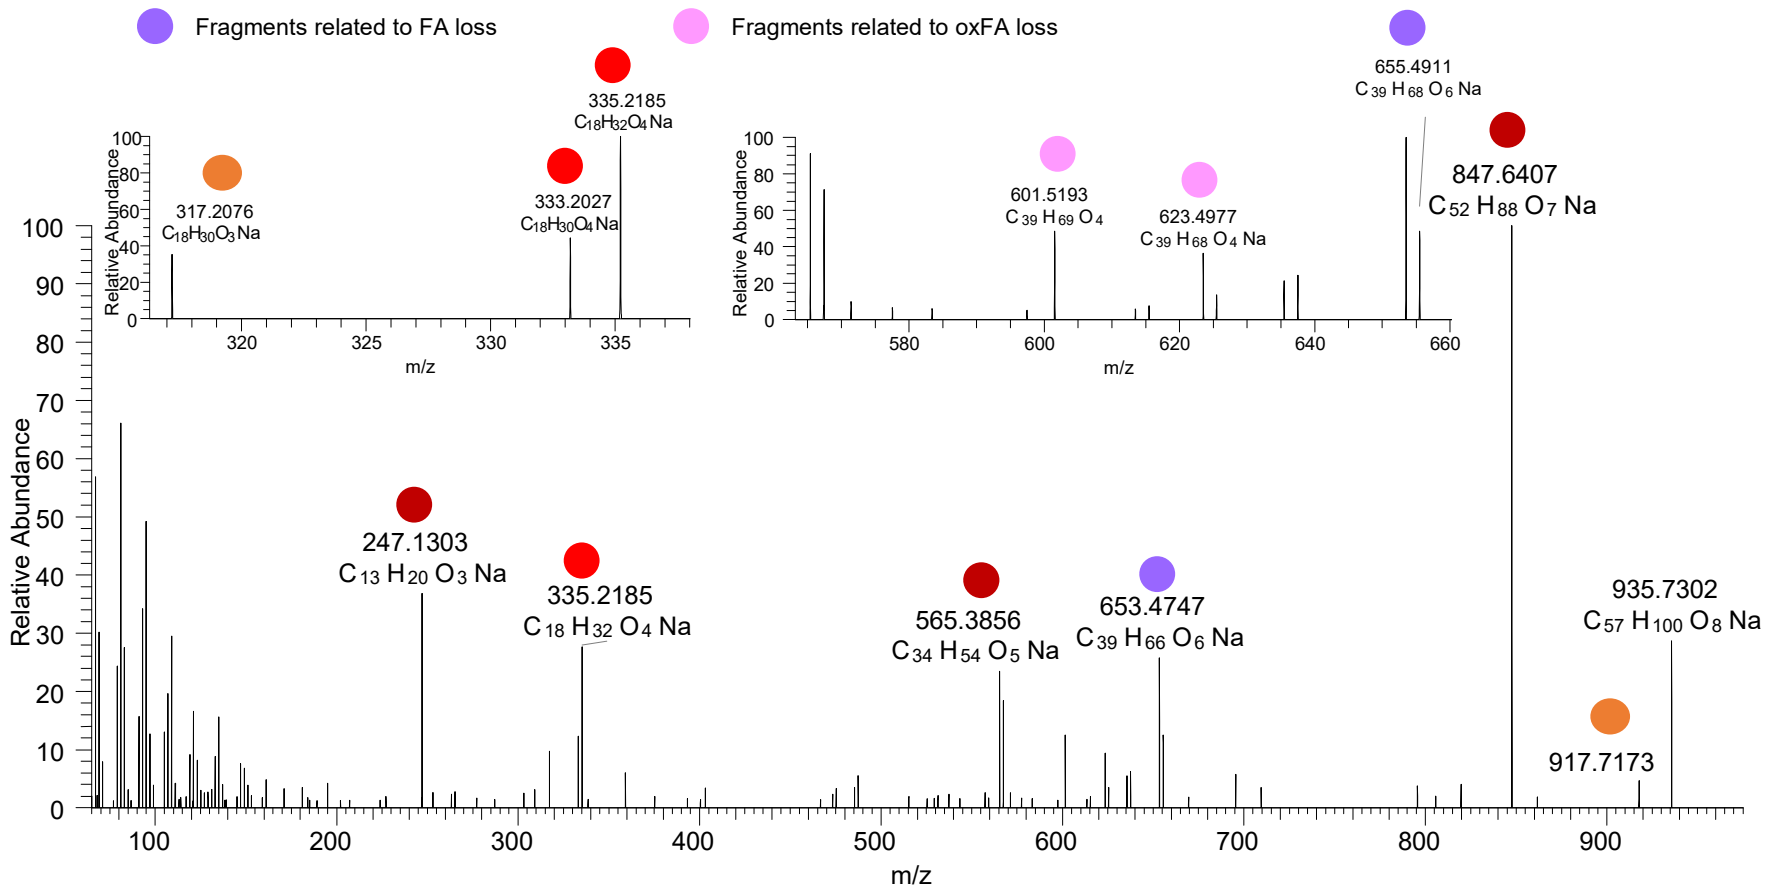

# TG(18:1\_18:1\_18:2<O,OH>) RT 22.8

[oxTG+Na]<sup>+</sup>

XIC 937.7467 NL: 1.35E5

- Fragments containing oxFAs
- Fragments related to water loss
- Fragments not containing oxFAs
- Fragments related to other oxLPPs
- Position-specific fragments
- Fragments related to FA loss
- Fragments related to oxFA loss

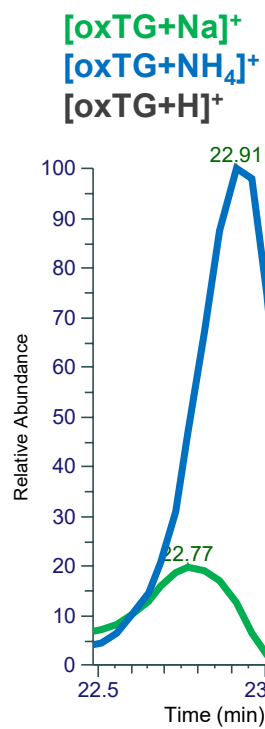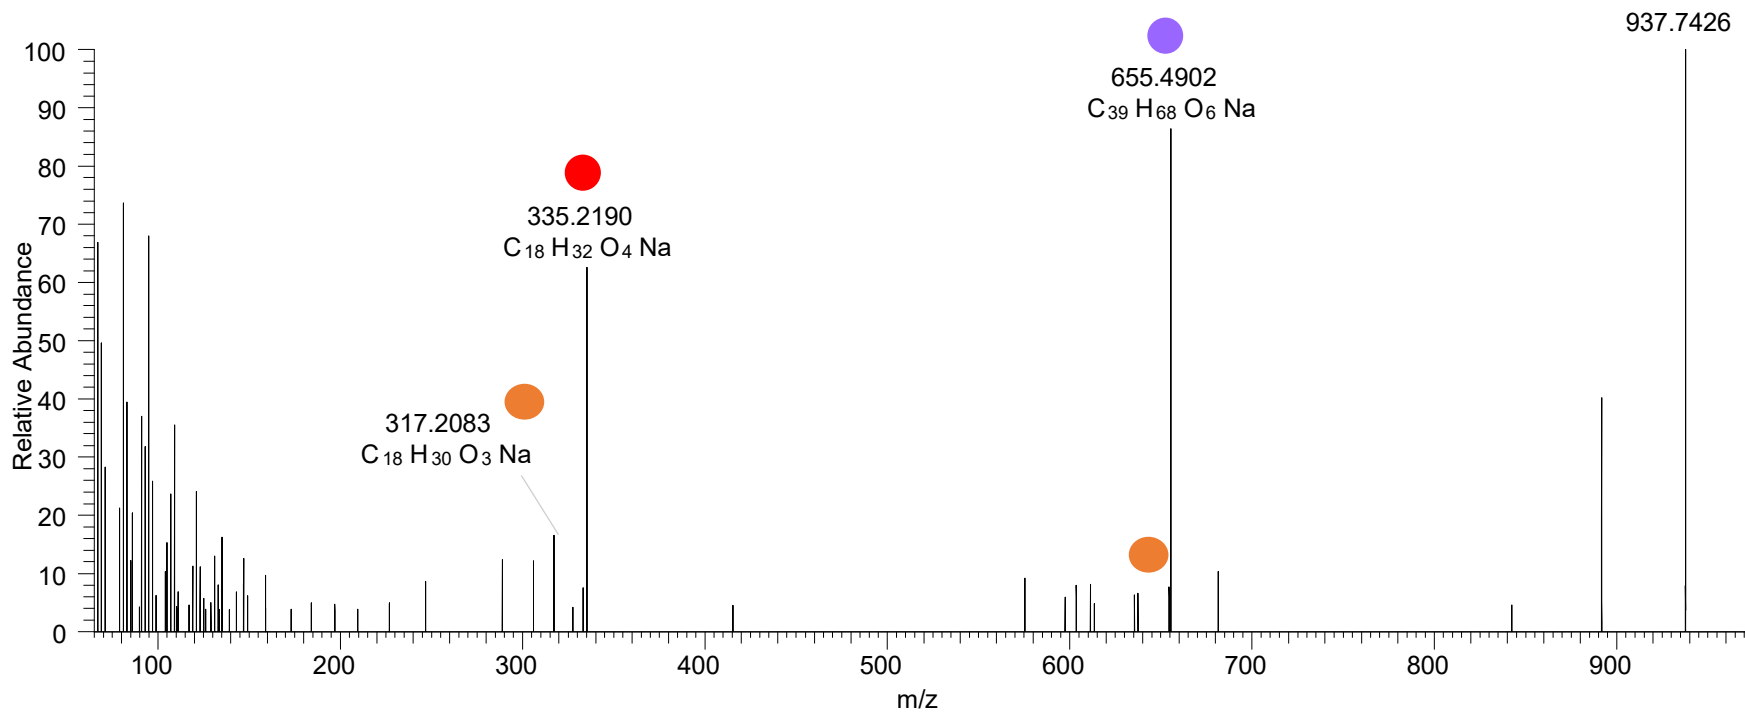

# TG(18:1\_18:1\_18:2<OOH{13}>)

RT 23.6

[oxTG+Na]<sup>+</sup>

XIC 937.7467 NL: 3.40E6

- Fragments containing oxFAs
- Fragments related to water loss
- Fragments not containing oxFAs
- Fragments related to other oxLPPs
- Position-specific fragments
- Fragments related to FA loss
- Fragments related to oxFA loss

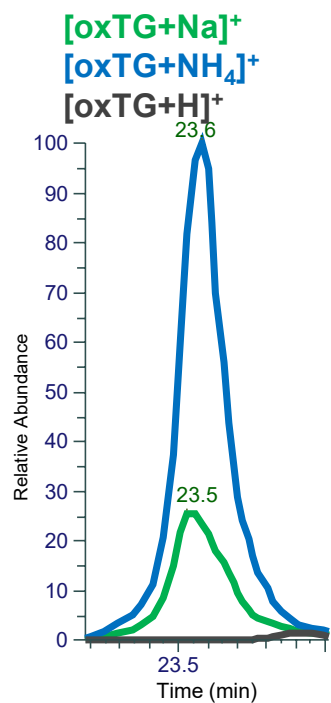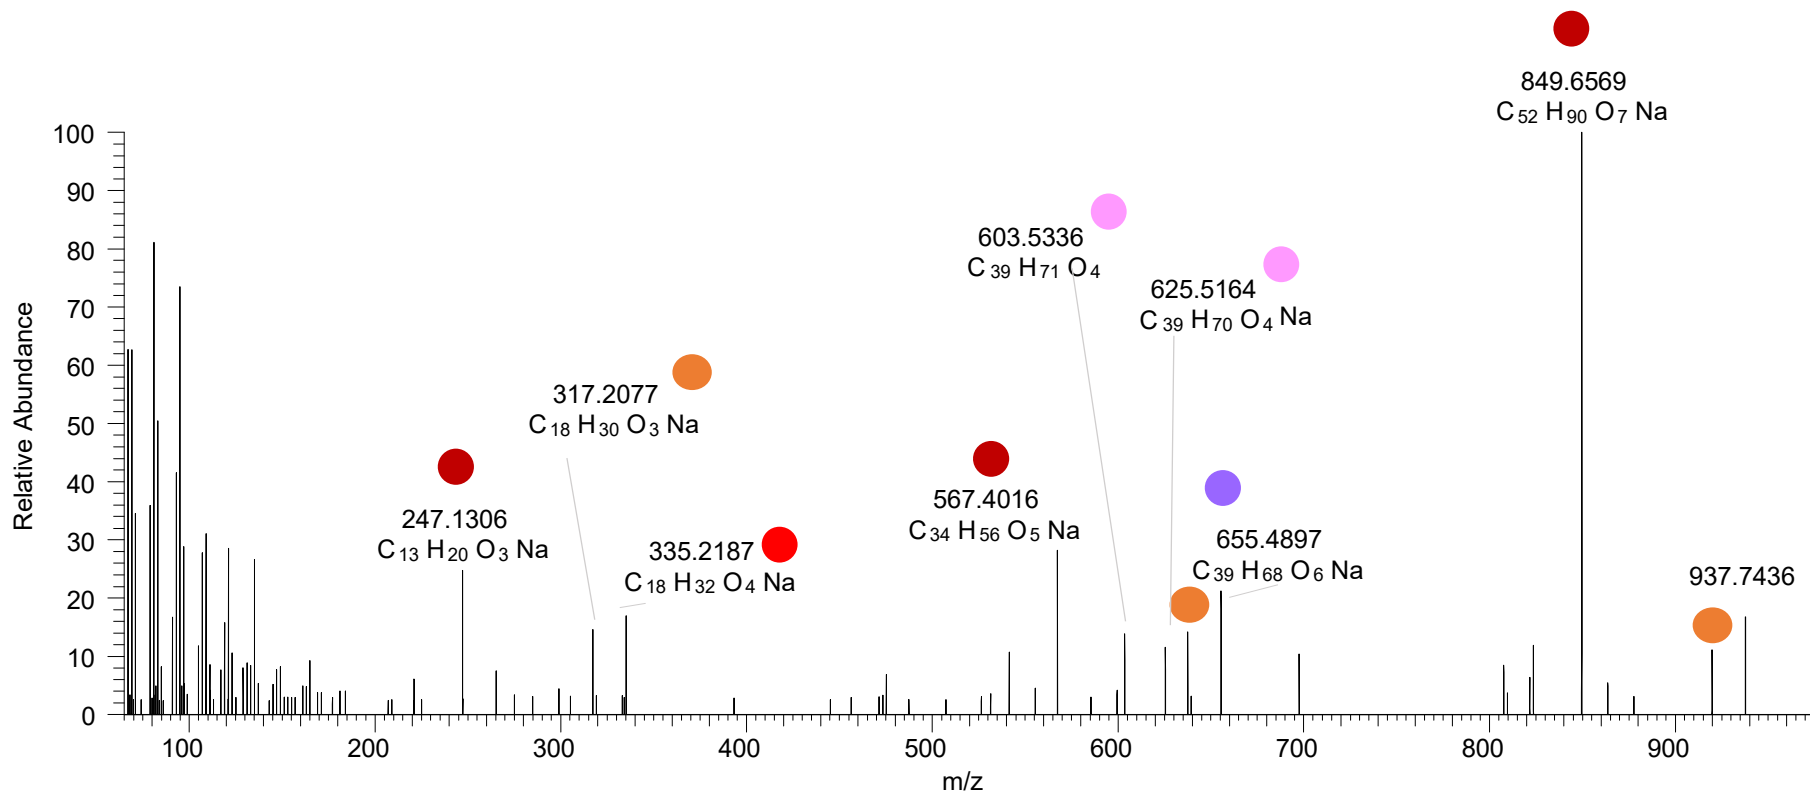

# TG(18:1\_18:3<O>\_18:2<2O>)

## RT 20.3

[oxTG+Na]<sup>+</sup>

XIC 949.7103 NL: 6.92E4

- Fragments containing oxFAs
- Fragments related to water loss
- Fragments not containing oxFAs
- Fragments related to other oxLPPs
- Position-specific fragments
- Fragments related to FA loss
- Fragments related to oxFA loss

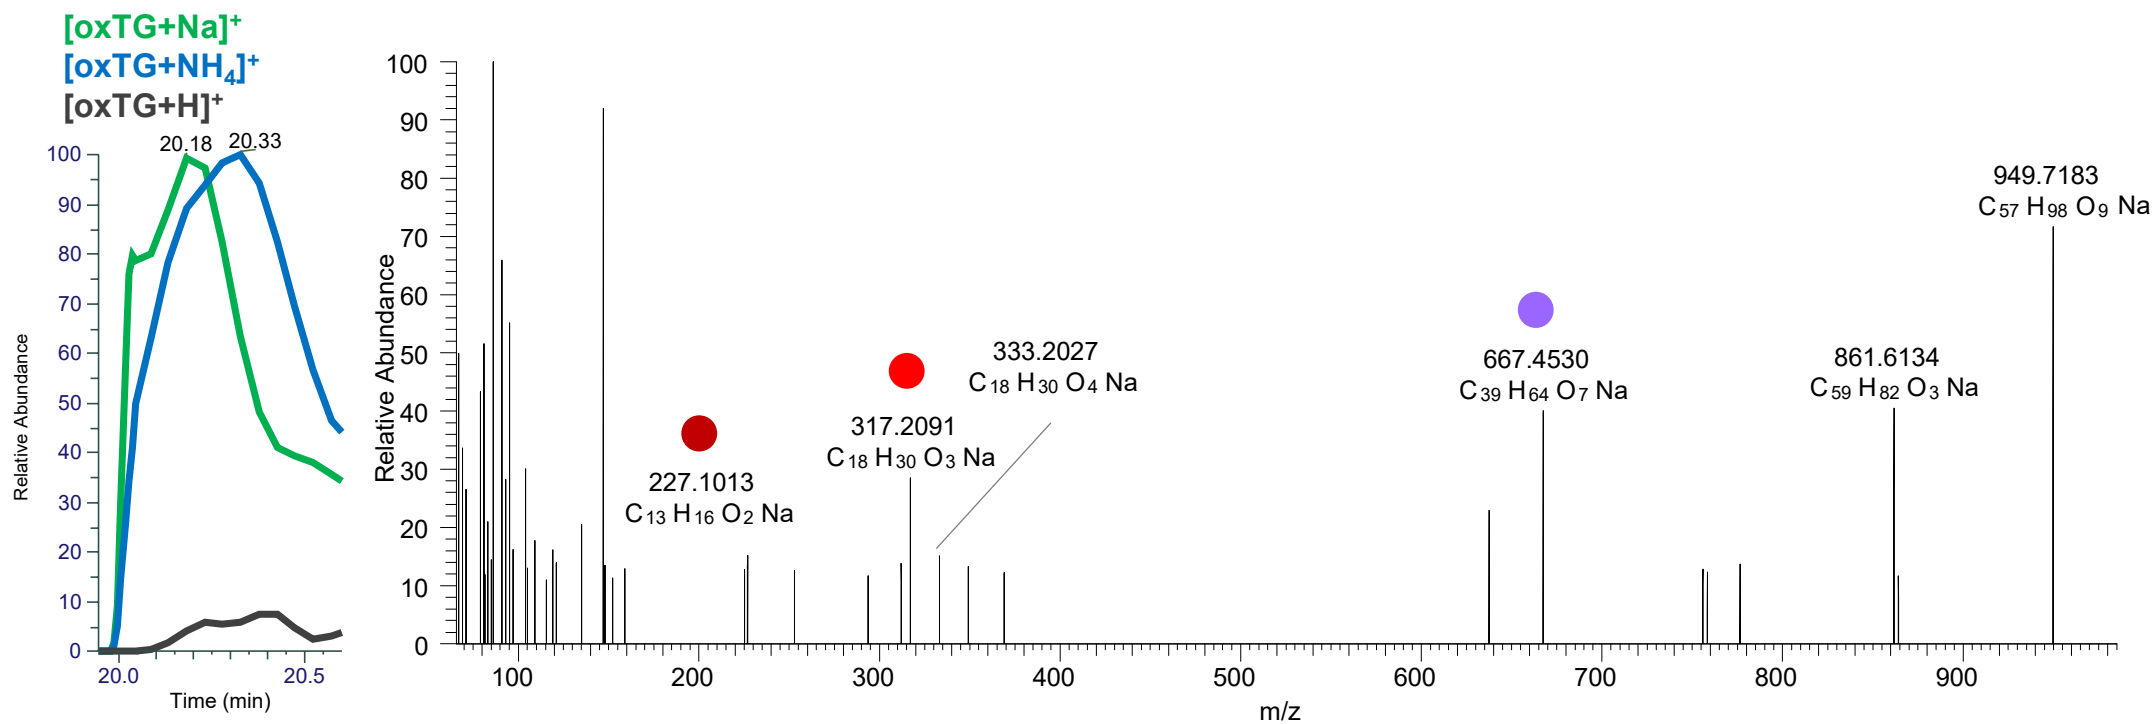

TG(18:1\_18:1\_18:4<3O>)  
TG(16:0\_18:1\_20:5<3O>)  
RT 21.3

[oxTG+Na]<sup>+</sup>

XIC 949.7103 NL: 5.96E4

- Fragments containing oxFAs
- Fragments related to water loss
- Fragments not containing oxFAs
- Fragments related to other oxLPPs
- Position-specific fragments
- Fragments related to FA loss
- Fragments related to oxFA loss

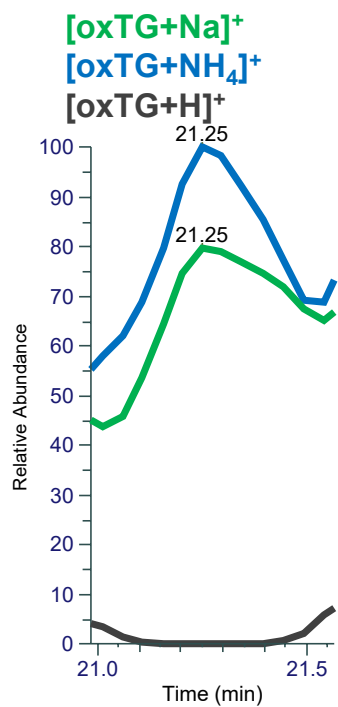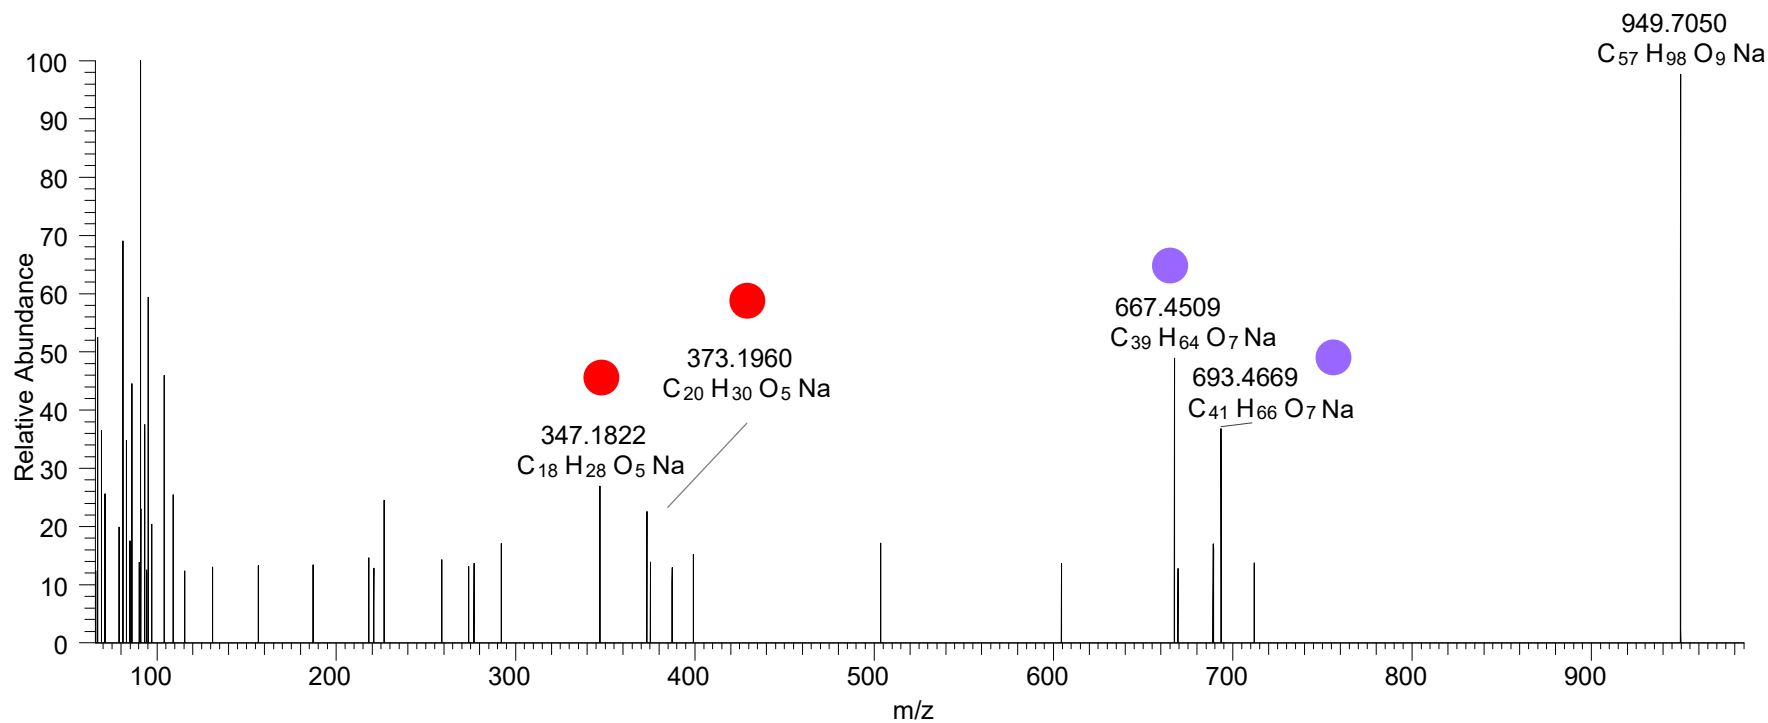

# TG(16:0\_18:1\_20:5<3O>)

RT 21.8

[oxTG+Na]<sup>+</sup>

XIC 949.7103 NL: 5.53E4

- Fragments containing oxFAs
- Fragments related to water loss
- Fragments not containing oxFAs
- Fragments related to other oxLPPs
- Position-specific fragments
- Fragments related to FA loss
- Fragments related to oxFA loss

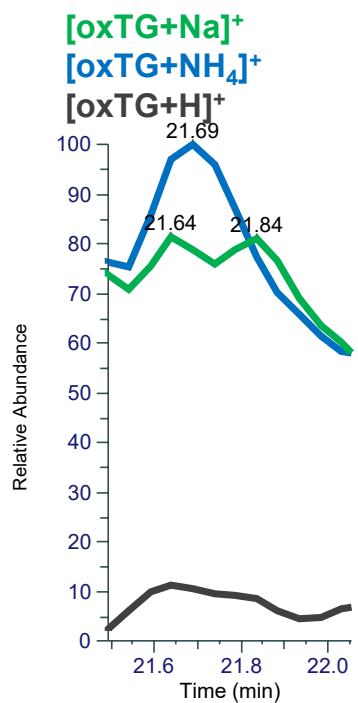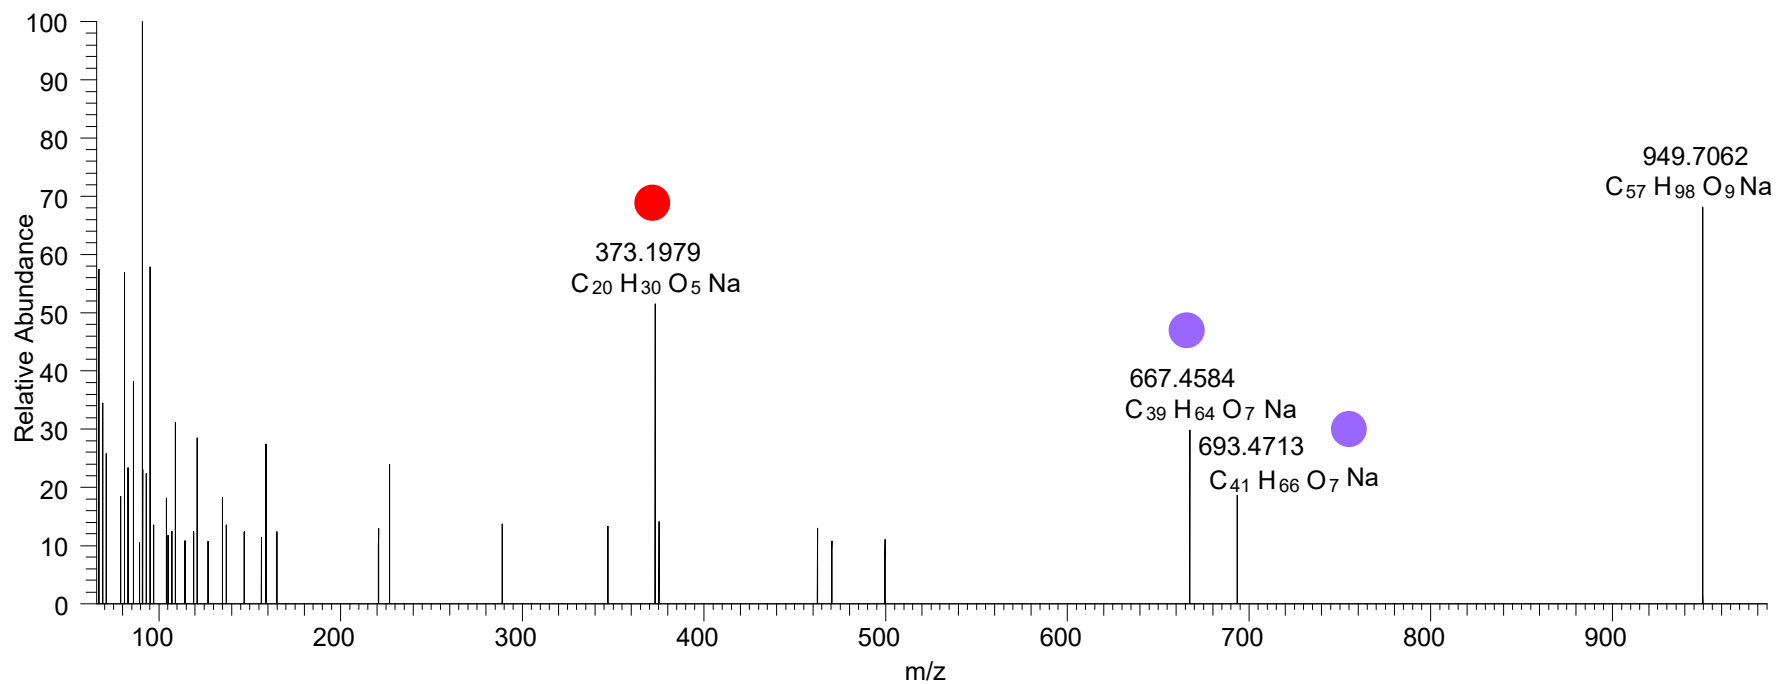

# TG(18:1\_18:2<O>\_18:2<OOH{13}>)

## RT 20.1

[oxTG+Na]<sup>+</sup>

XIC 951.7259 NL: 3.90E5

- Fragments containing oxFAs
- Fragments related to water loss
- Fragments not containing oxFAs
- Fragments related to other oxLPPs
- Position-specific fragments
- Fragments related to FA loss
- Fragments related to oxFA loss

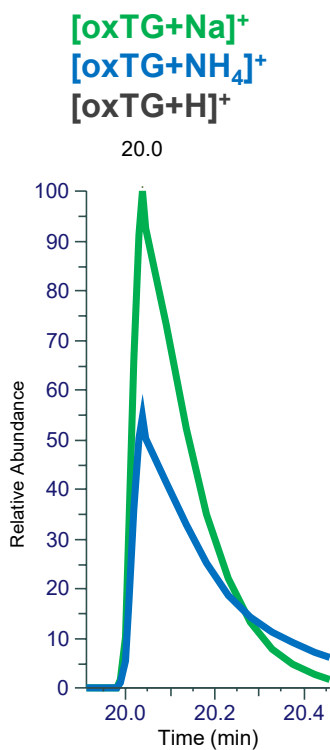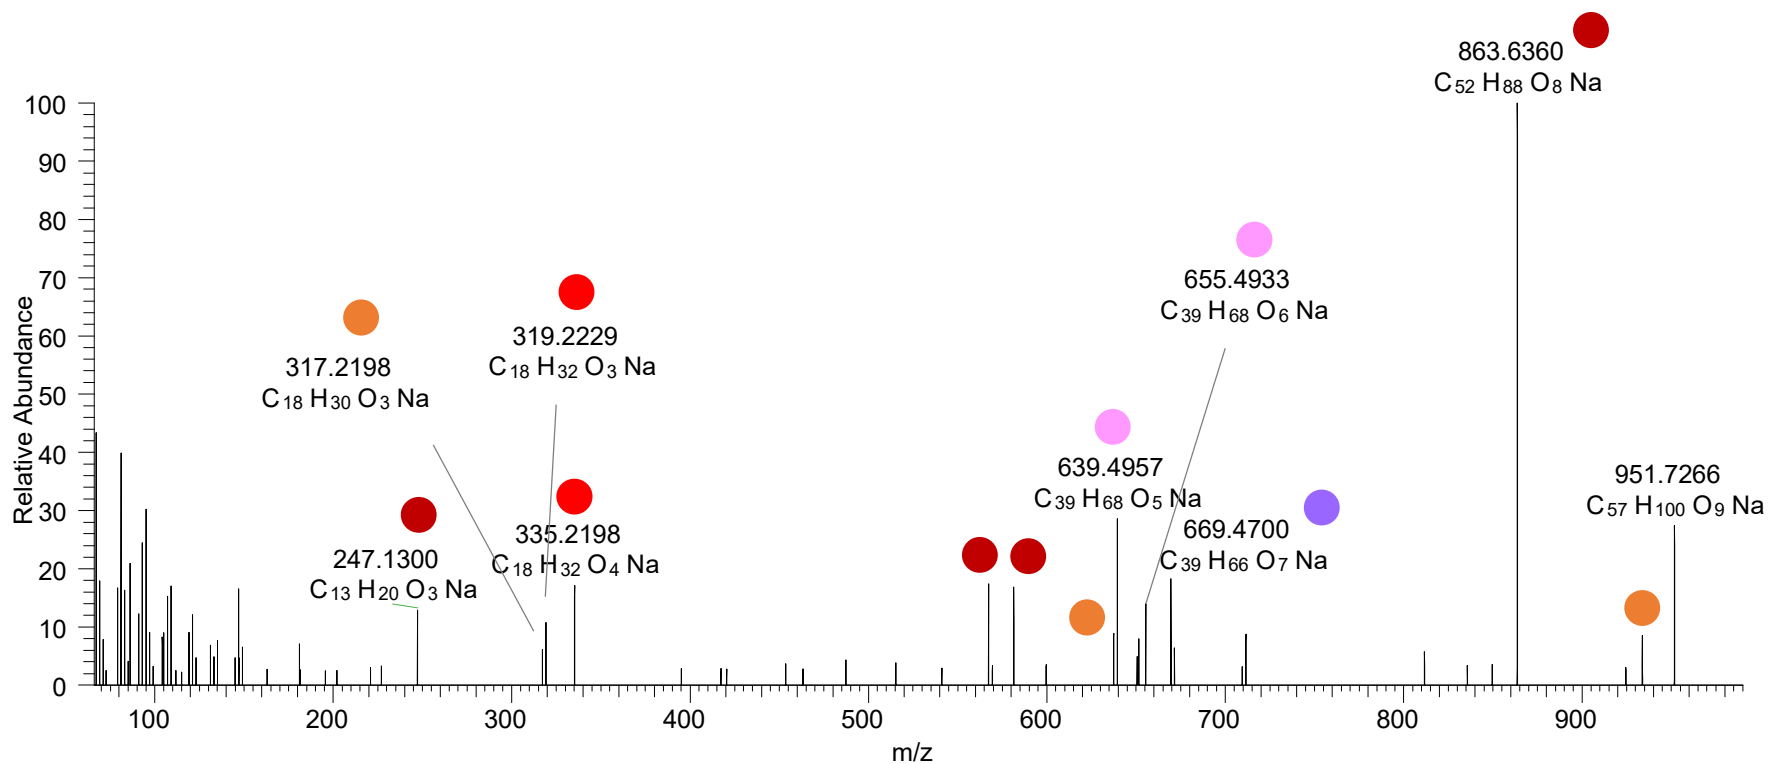

TG(18:1\_18:1\_18:3<3O>)  
TG(16:0\_18:1\_20:4<3O>)  
RT 21.2

[oxTG+Na]<sup>+</sup>

XIC 951.7259 NL: 3.47E4

- Fragments containing oxFAs
- Fragments related to water loss
- Fragments not containing oxFAs
- Fragments related to other oxLPPs
- Position-specific fragments
- Fragments related to FA loss
- Fragments related to oxFA loss

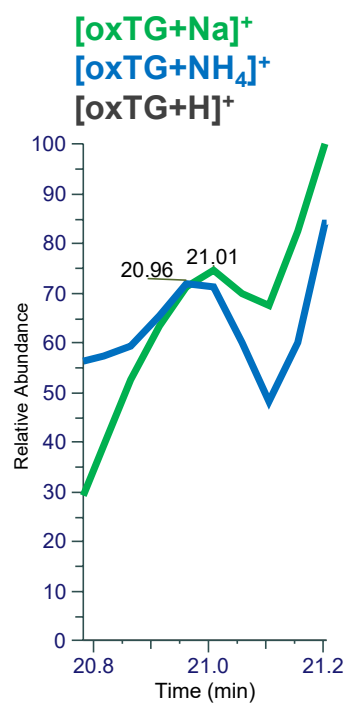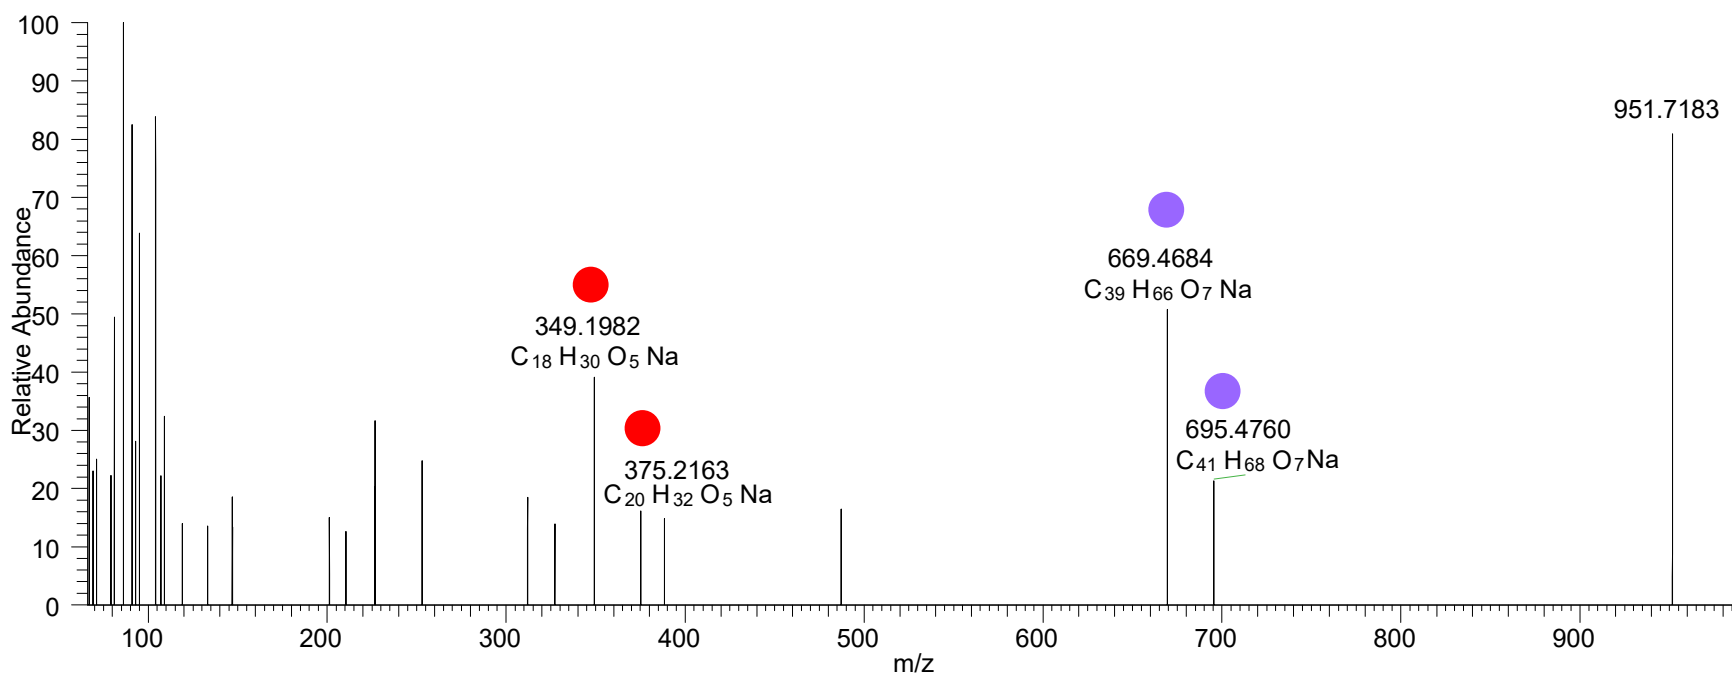



# TG(16:0\_18:1\_20:3<ep,OOH{15}>) RT 22.1

[oxTG+Na]<sup>+</sup>

XIC 951.7259 NL: 9.20E4

- Fragments containing oxFAs
- Fragments related to water loss
- Fragments not containing oxFAs
- Fragments related to other oxLPPs
- Position-specific fragments
- Fragments related to FA loss
- Fragments related to oxFA loss

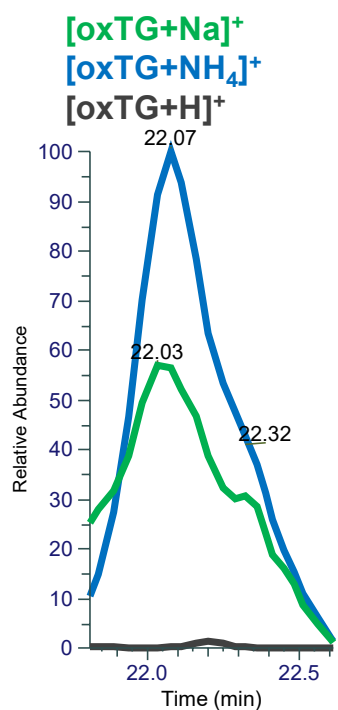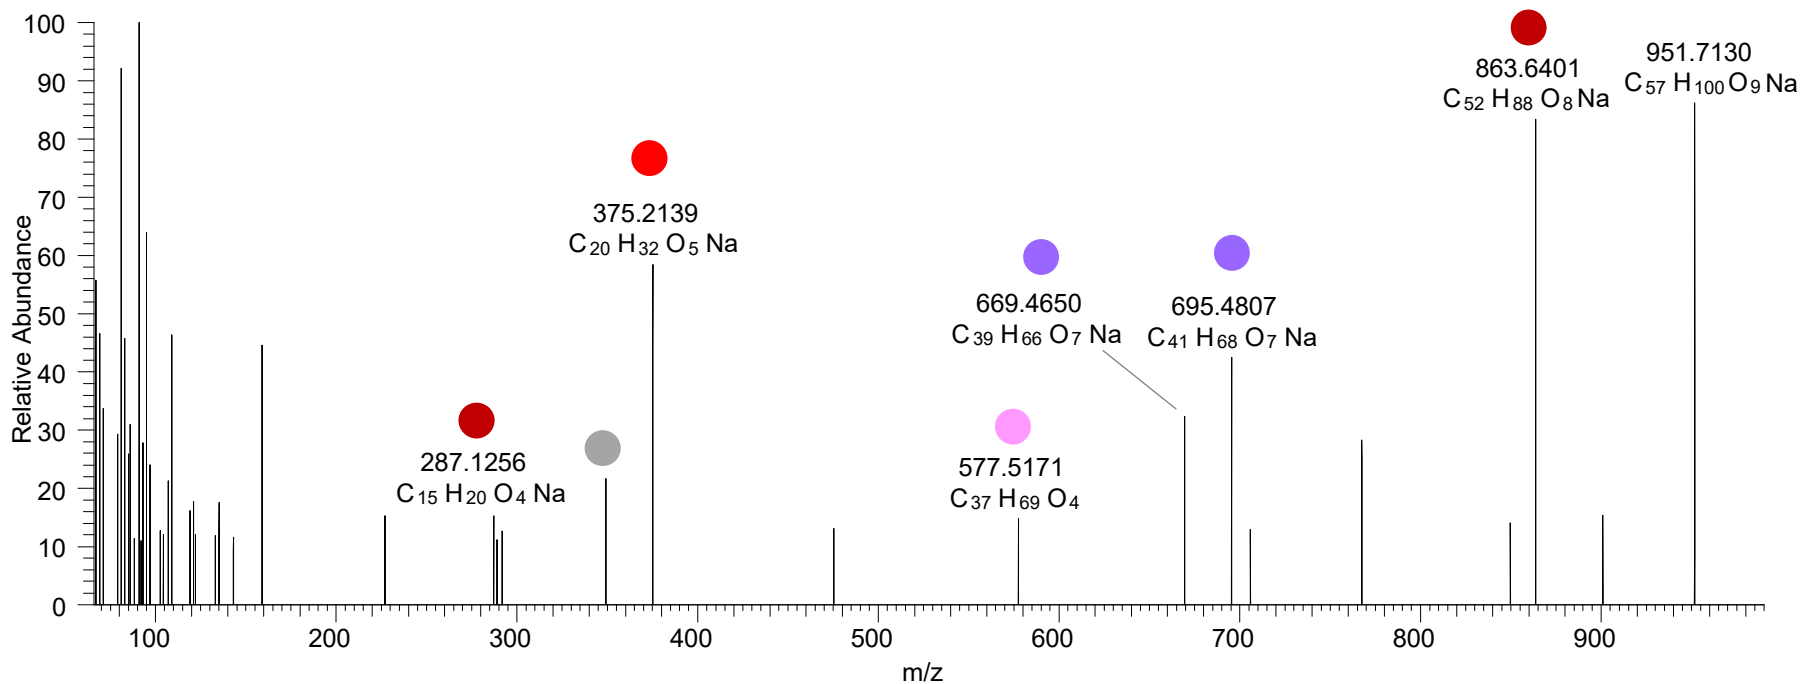

OT2D\_pool

# TG(16:1\_18:1\_16:0<OH>)

## RT 23.4

[oxTG+Na]<sup>+</sup>

XIC 869.7205 NL: 2.52E5

- Fragments containing oxFAs
- Fragments related to water loss
- Fragments not containing oxFAs
- Fragments related to other oxLPPs
- Position-specific fragments
- Fragments related to FA loss
- Fragments related to oxFA loss

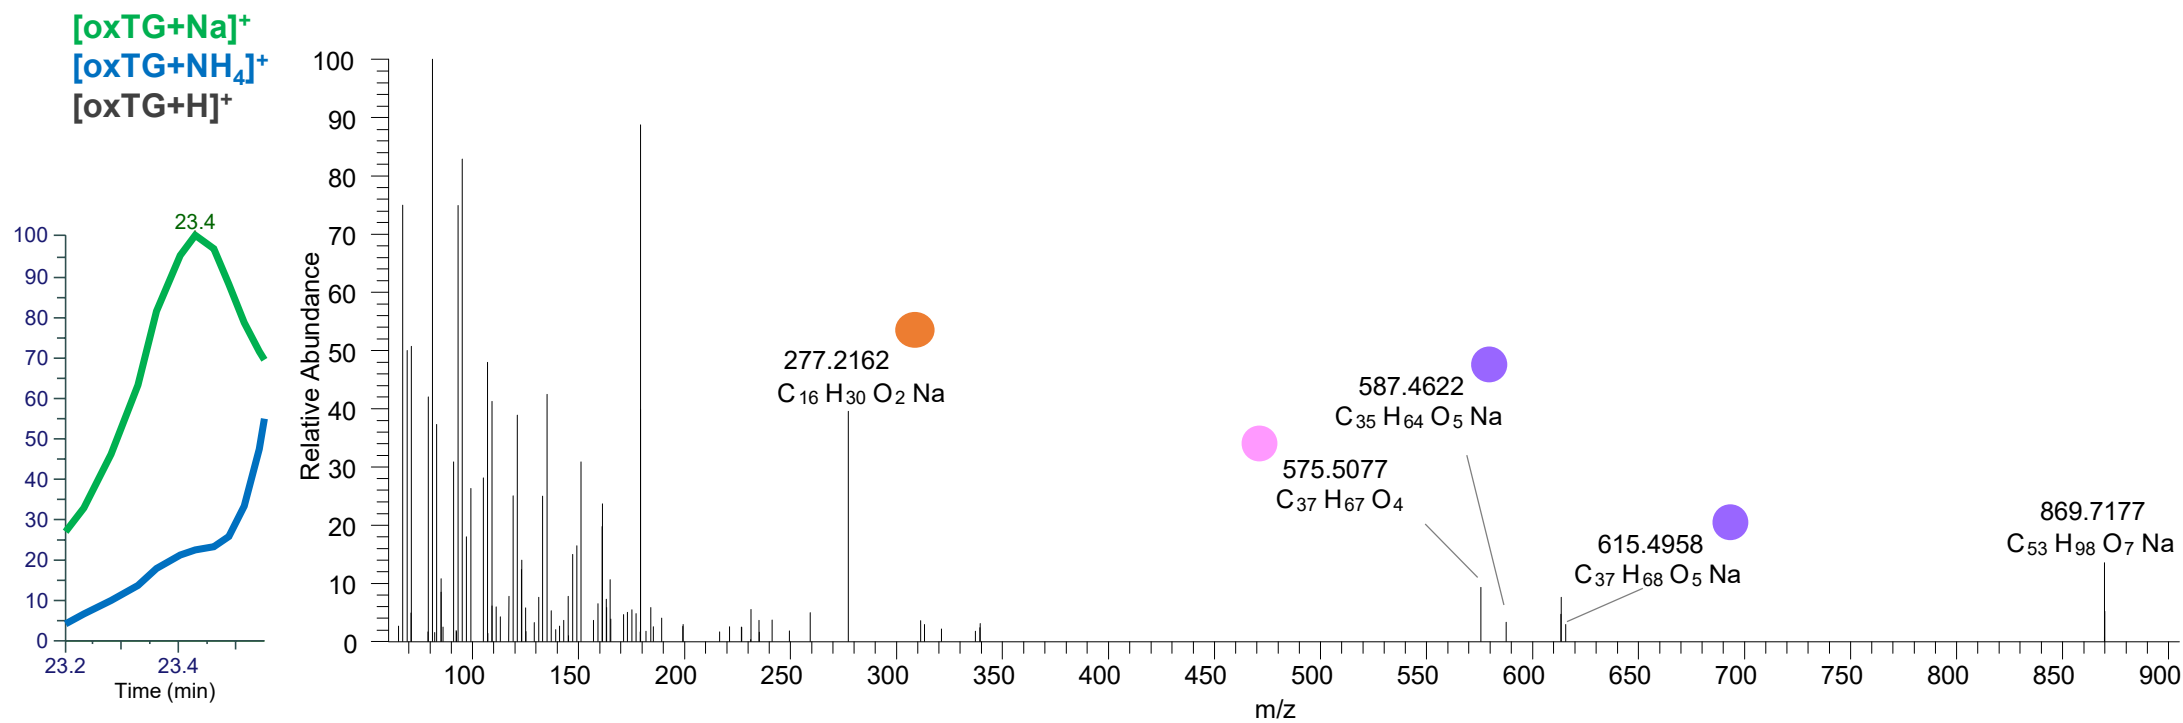

# TG(16:0\_16:0\_18:2<OH>)

RT 23.7

[oxTG+Na]<sup>+</sup>

XIC 869.7205 NL: 2.70E5

- Fragments containing oxFAs
- Fragments related to water loss
- Fragments not containing oxFAs
- Fragments related to other oxLPPs
- Position-specific fragments
- Fragments related to FA loss
- Fragments related to oxFA loss

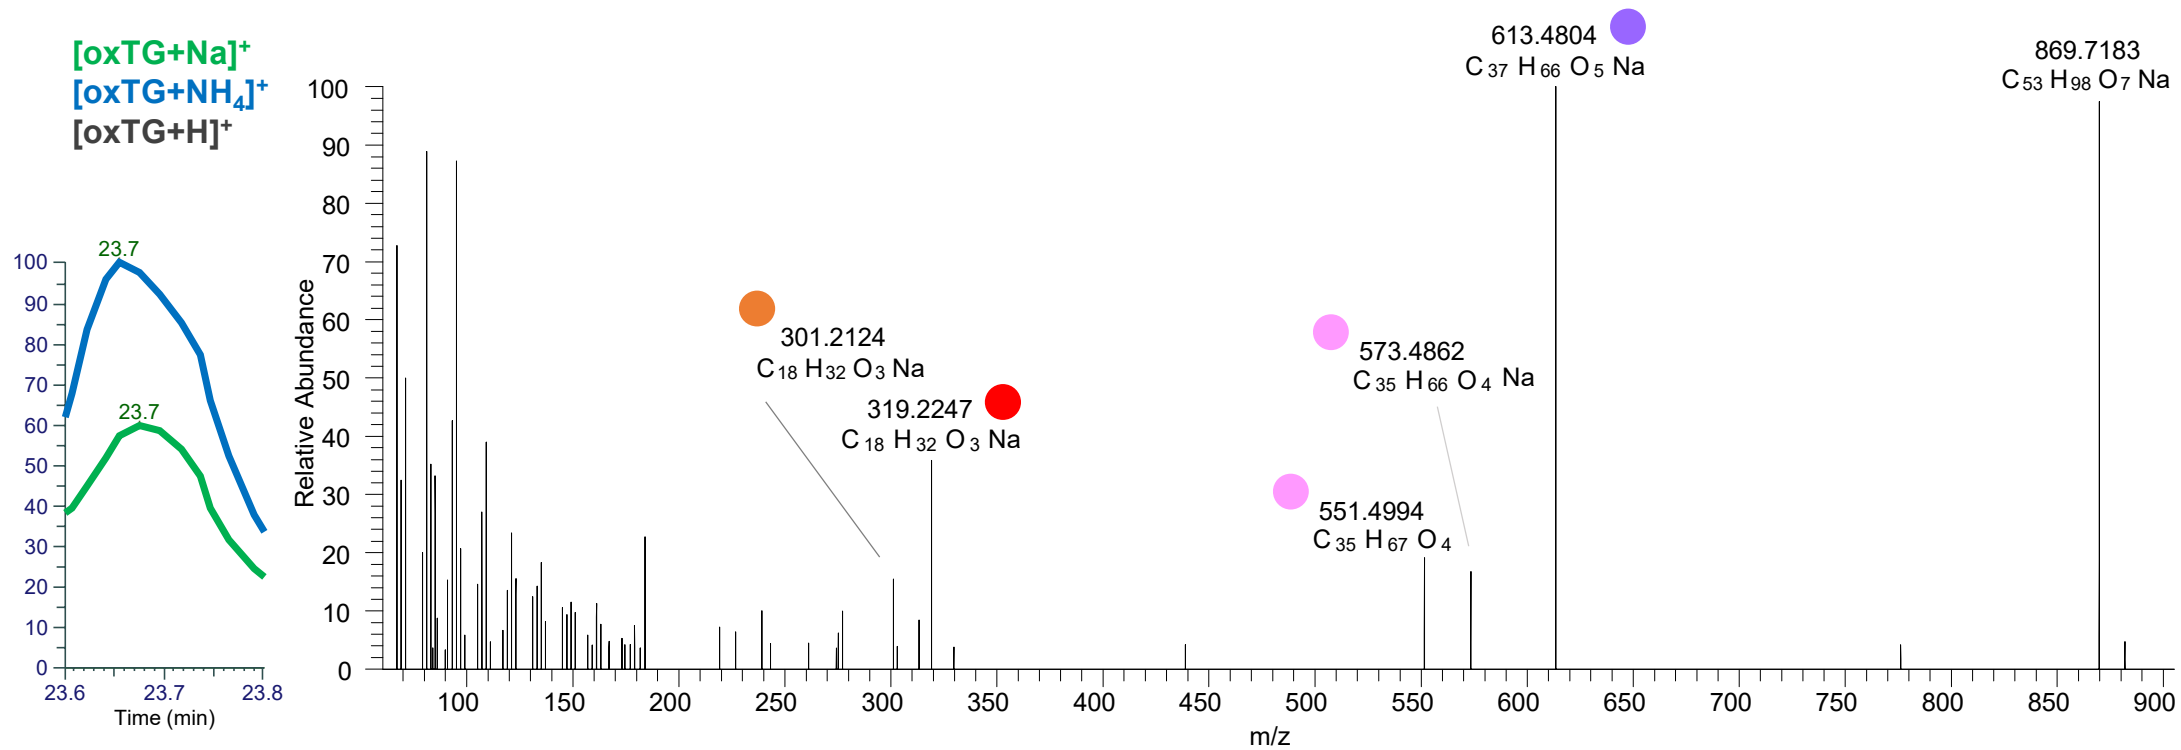

# TG(16:0\_16:0\_18:1<ep>)

RT 24.3

[oxTG+Na]<sup>+</sup>

XIC 869.7205 NL: 3.51E4

- Fragments containing oxFAs
- Fragments related to water loss
- Fragments not containing oxFAs
- Fragments related to other oxLPPs
- Position-specific fragments
- Fragments related to FA loss
- Fragments related to oxFA loss

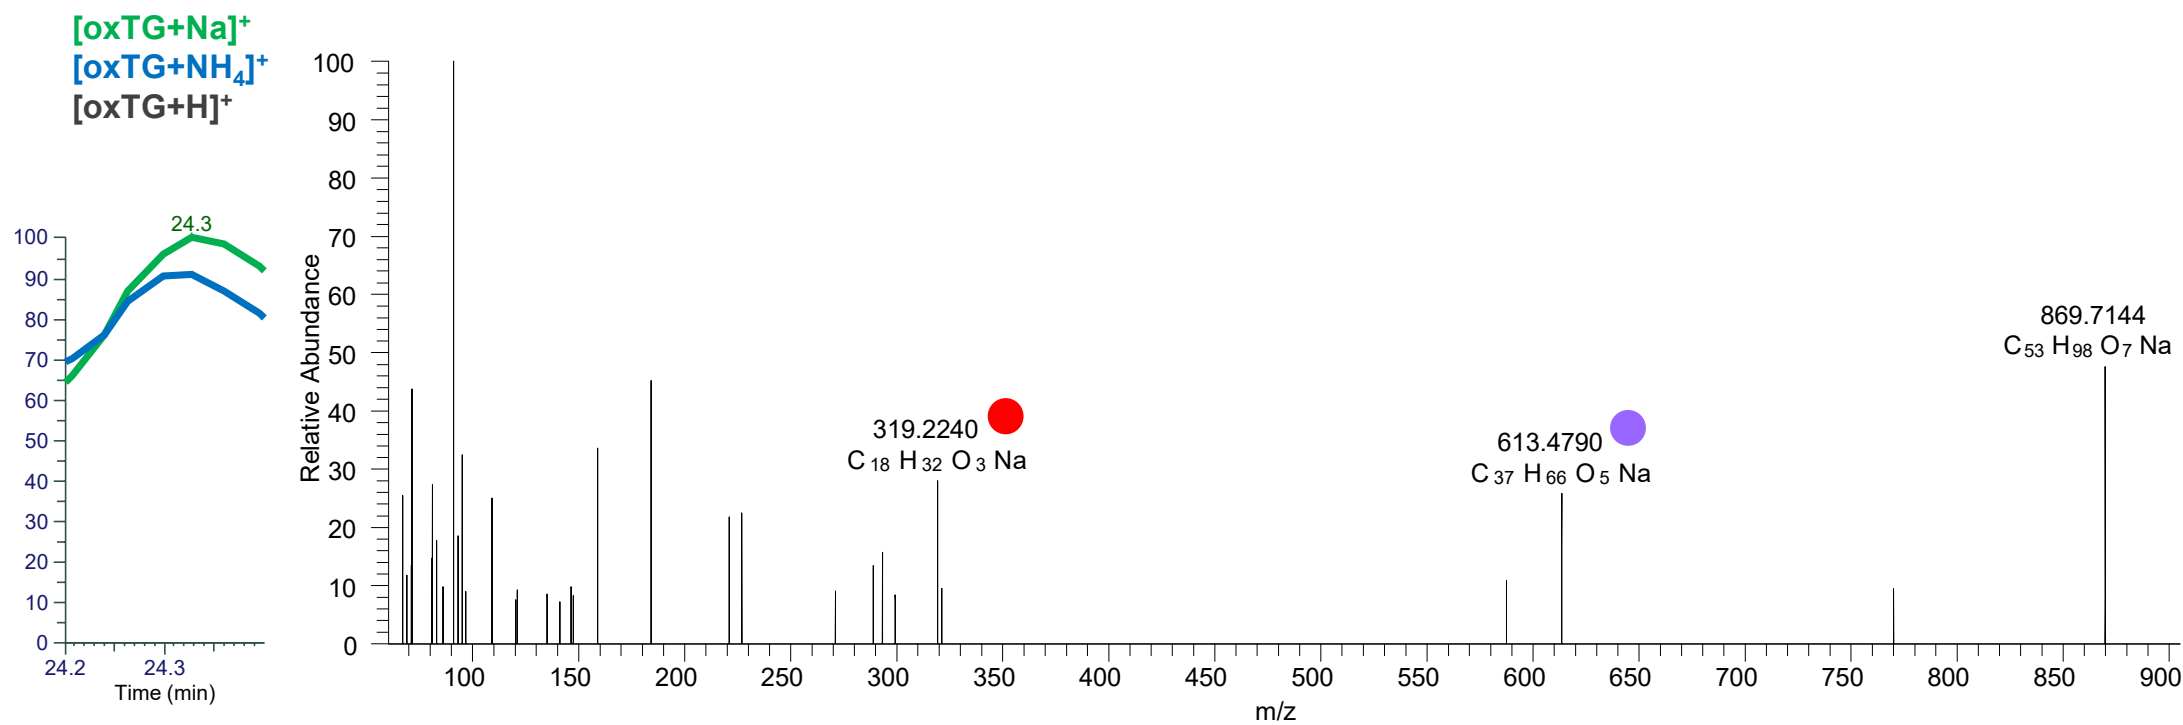

TG(16:0\_18:2\_18:2<OH>)  
TG(16:1\_18:1\_18:2<OH>)  
RT 23.2

[oxTG+Na]<sup>+</sup>

XIC 893.7204 NL: 2.24E6

- Fragments containing oxFAs
- Fragments related to water loss
- Fragments not containing oxFAs
- Fragments related to other oxLPPs
- Position-specific fragments
- Fragments related to FA loss
- Fragments related to oxFA loss

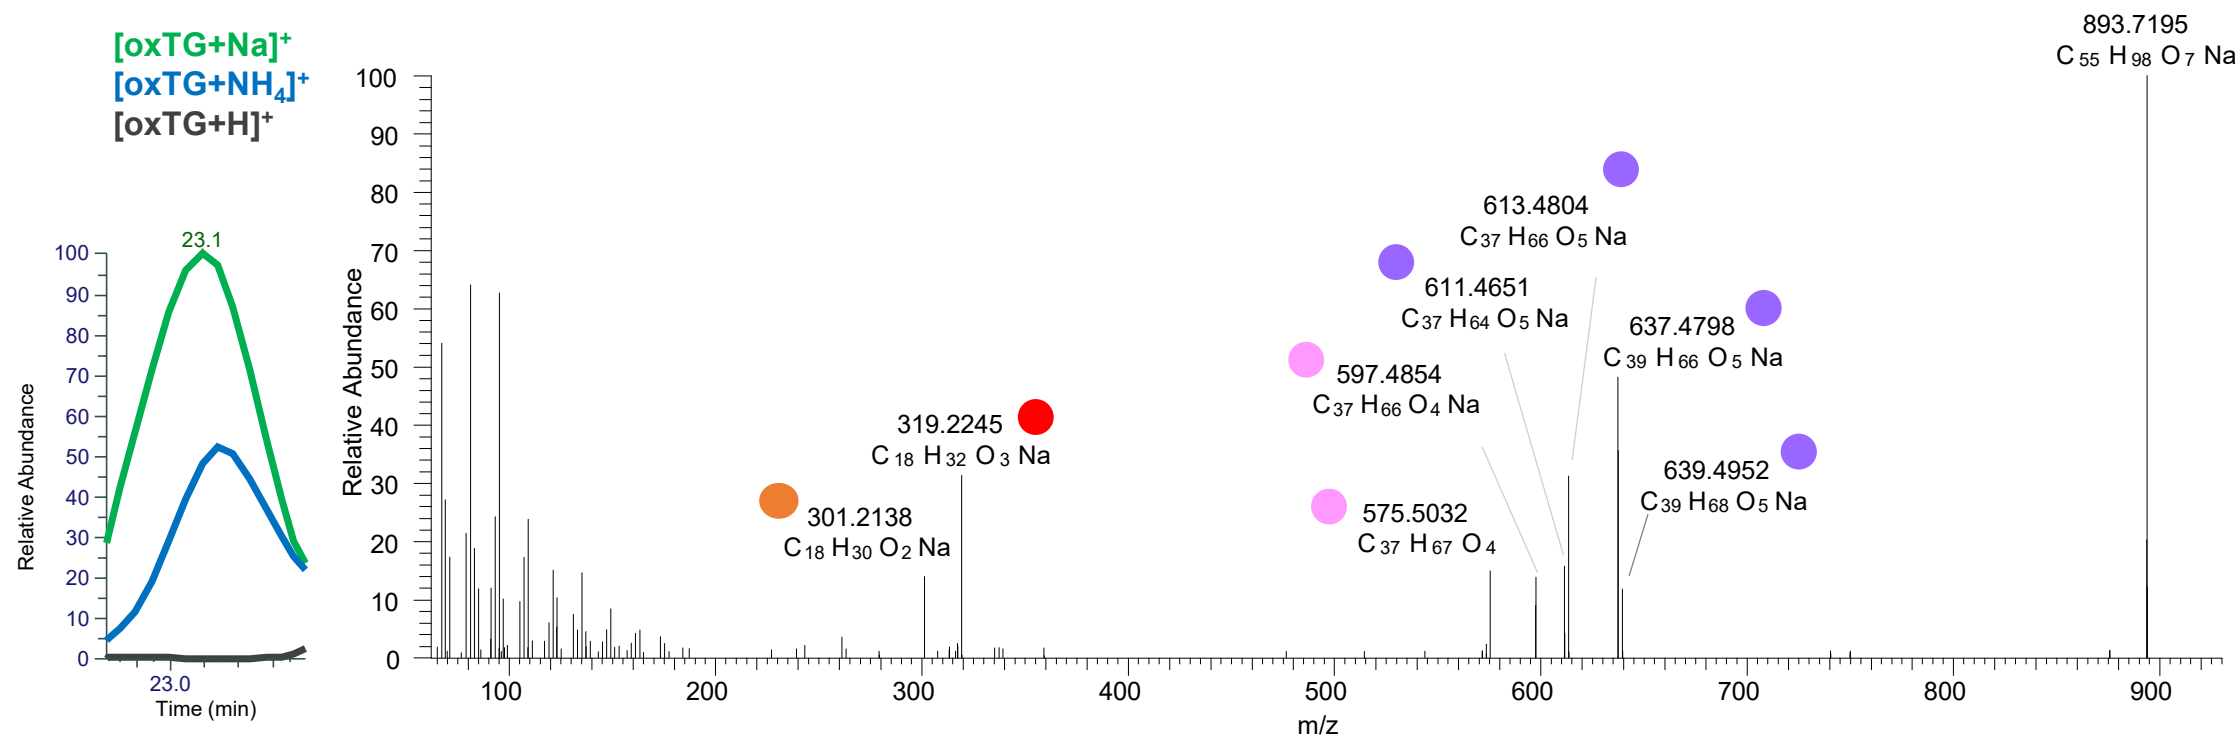

TG(16:1\_18:1\_18:2<OH>)  
TG(16:0\_18:1\_18:3<OH>)  
RT 23.3

[oxTG+Na]<sup>+</sup>

XIC 893.7204 NL: 2.24E6

- Fragments containing oxFAs
- Fragments related to water loss
- Fragments not containing oxFAs
- Fragments related to other oxLPPs
- Position-specific fragments
- Fragments related to FA loss
- Fragments related to oxFA loss

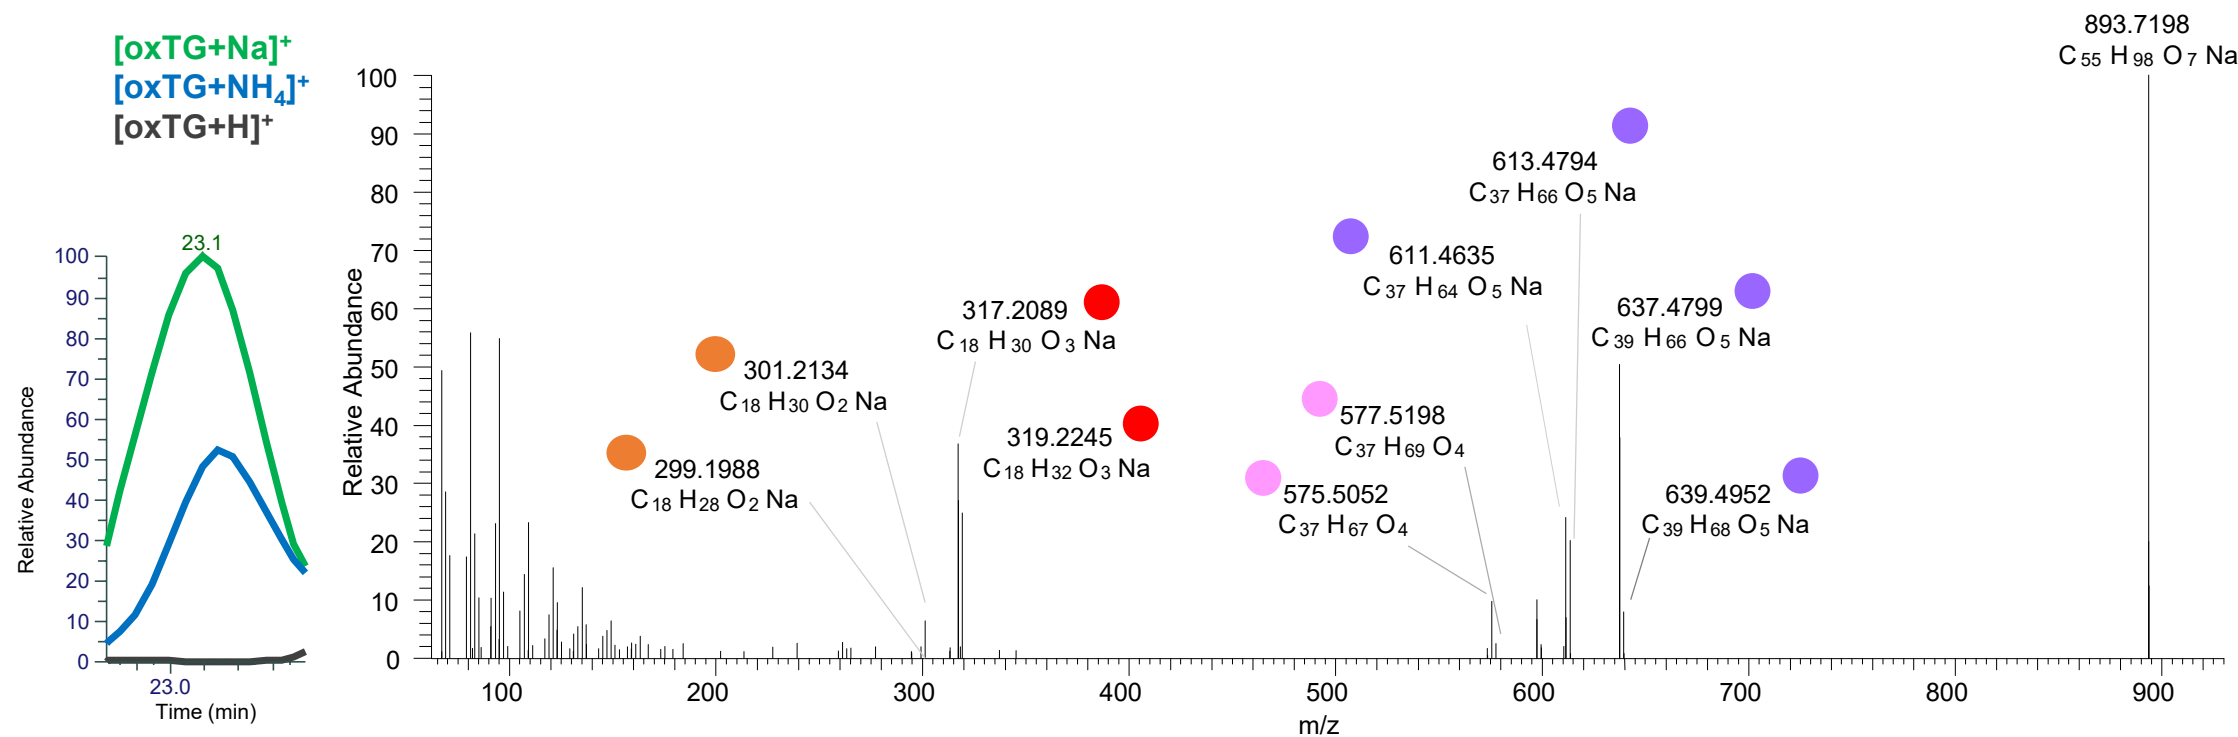

# TG(16:0\_18:1\_18:2<oxo>)

RT 24.0

[oxTG+Na]<sup>+</sup>

XIC 893.7204 NL: 5.85E5

- Fragments containing oxFAs
- Fragments related to water loss
- Fragments not containing oxFAs
- Fragments related to other oxLPPs
- Position-specific fragments
- Fragments related to FA loss
- Fragments related to oxFA loss

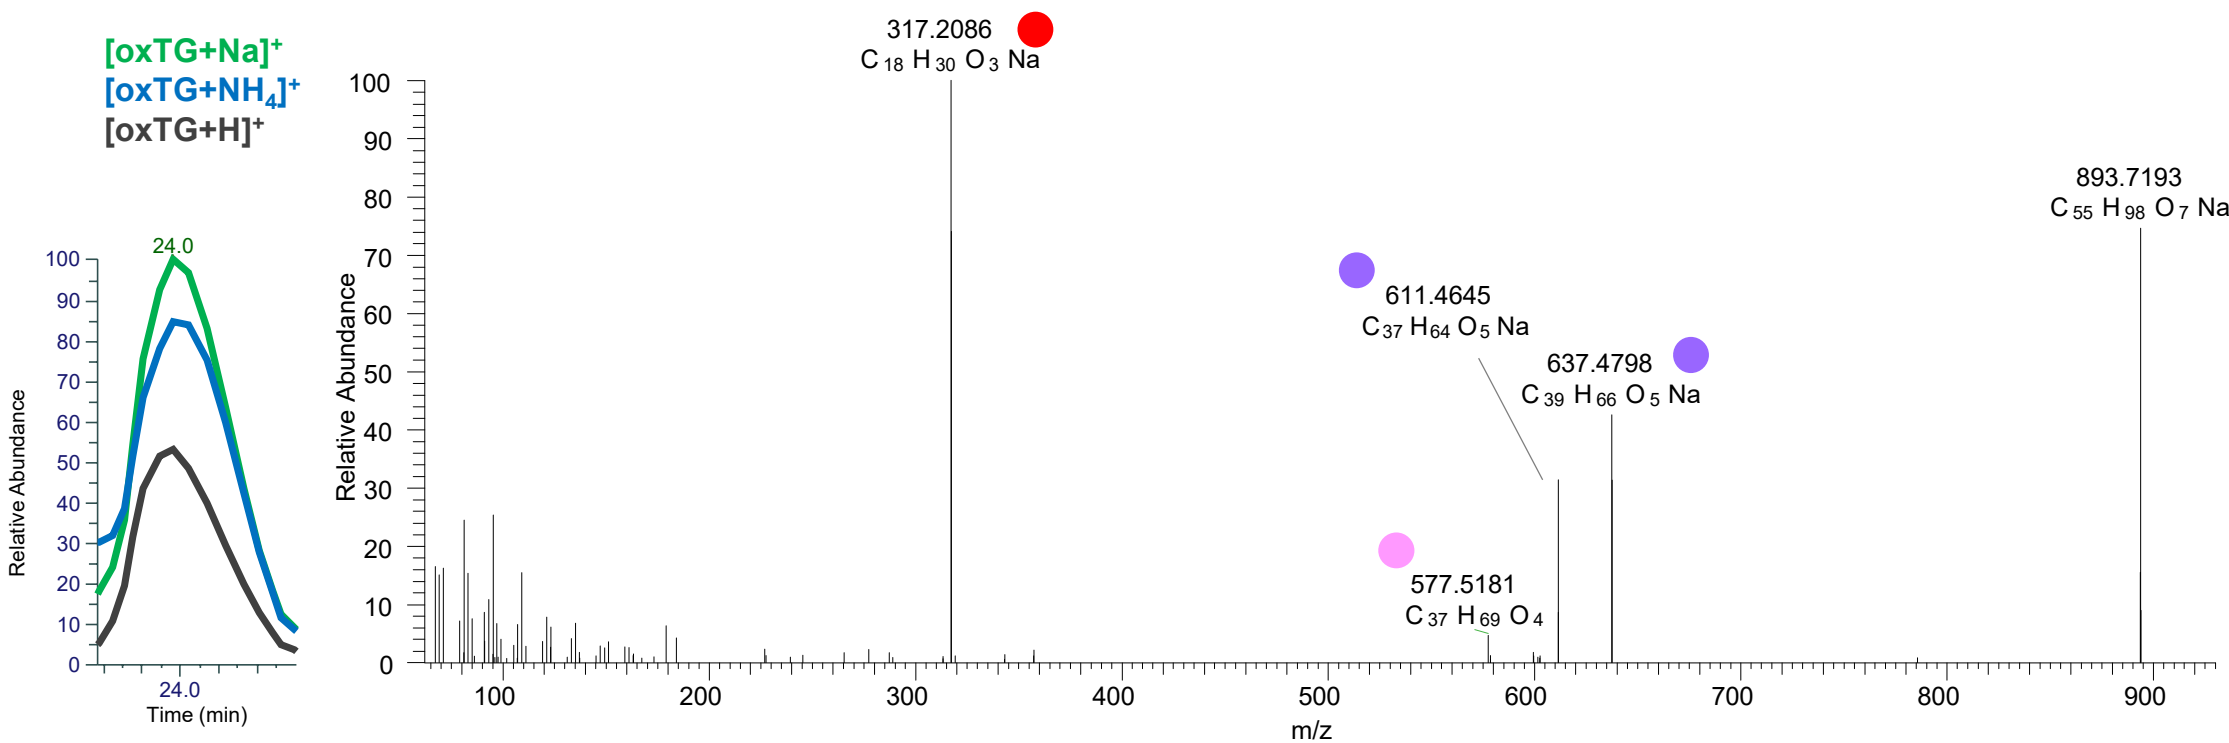



# TG(16:0\_18:1\_18:3<O>)

RT 24.6

[oxTG+Na]<sup>+</sup>

XIC 893.7204 NL: 7.14E4

- Fragments containing oxFAs
- Fragments related to water loss
- Fragments not containing oxFAs
- Fragments related to other oxLPPs
- Position-specific fragments
- Fragments related to FA loss
- Fragments related to oxFA loss

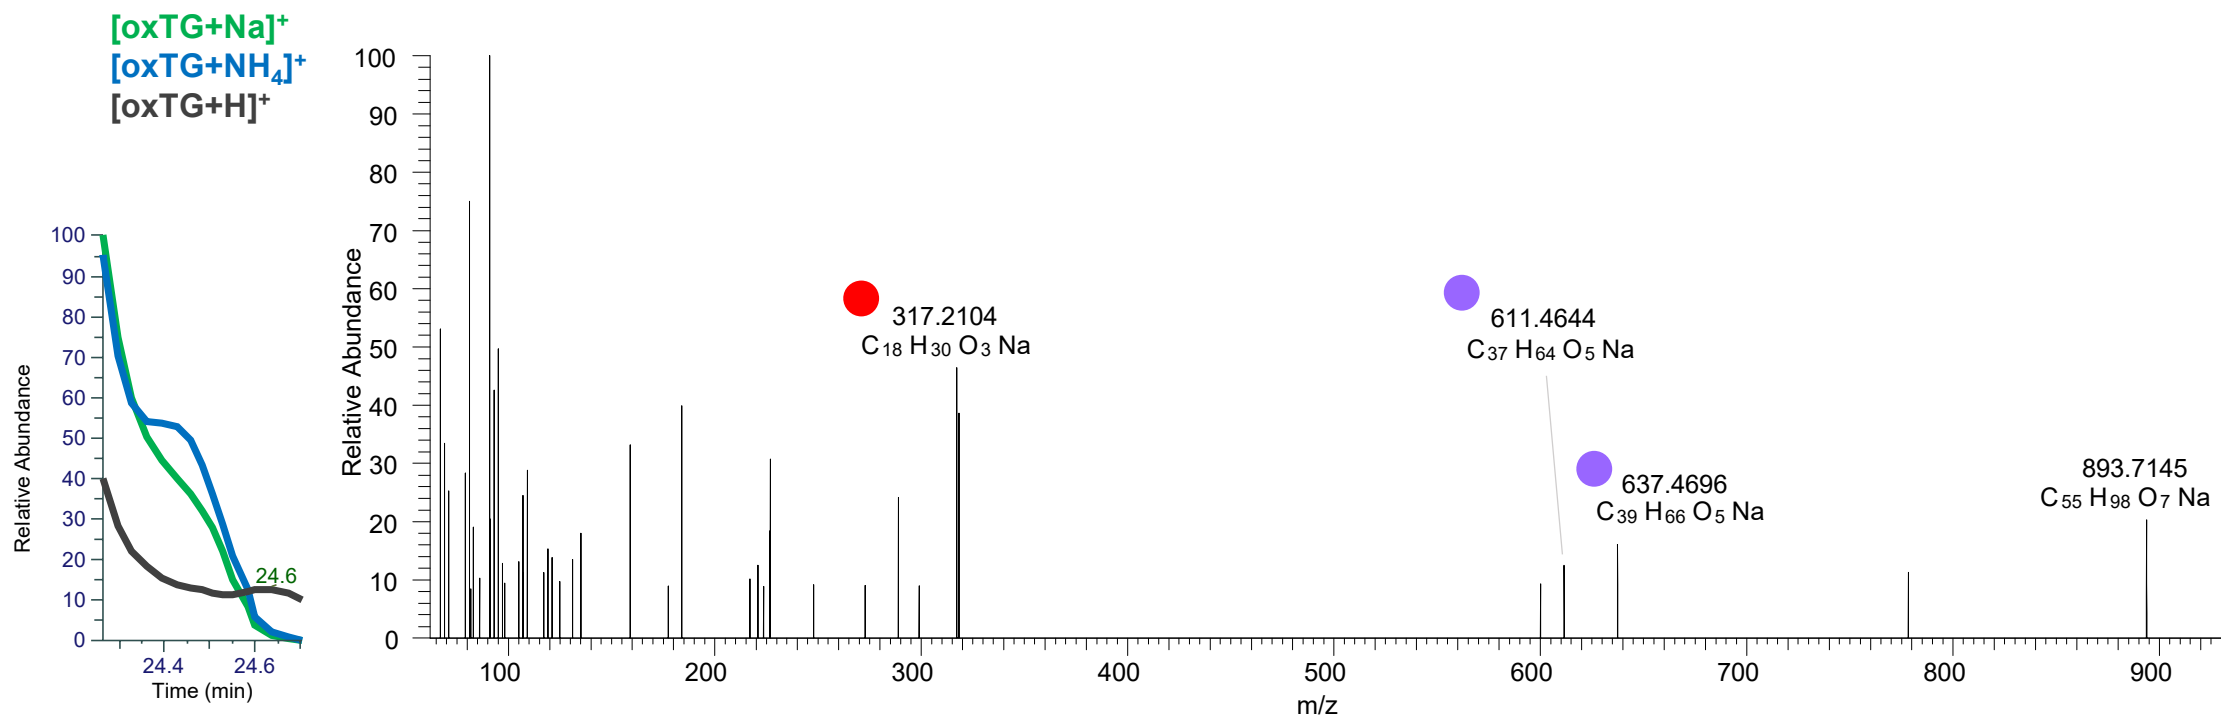

# TG(16:0\_18:1\_18:2<ep>)

RT 25.4

[oxTG+Na]<sup>+</sup>

XIC 893.7204 NL: 3.85E5

- Fragments containing oxFAs
- Fragments related to water loss
- Fragments not containing oxFAs
- Fragments related to other oxLPPs
- Position-specific fragments
- Fragments related to FA loss
- Fragments related to oxFA loss

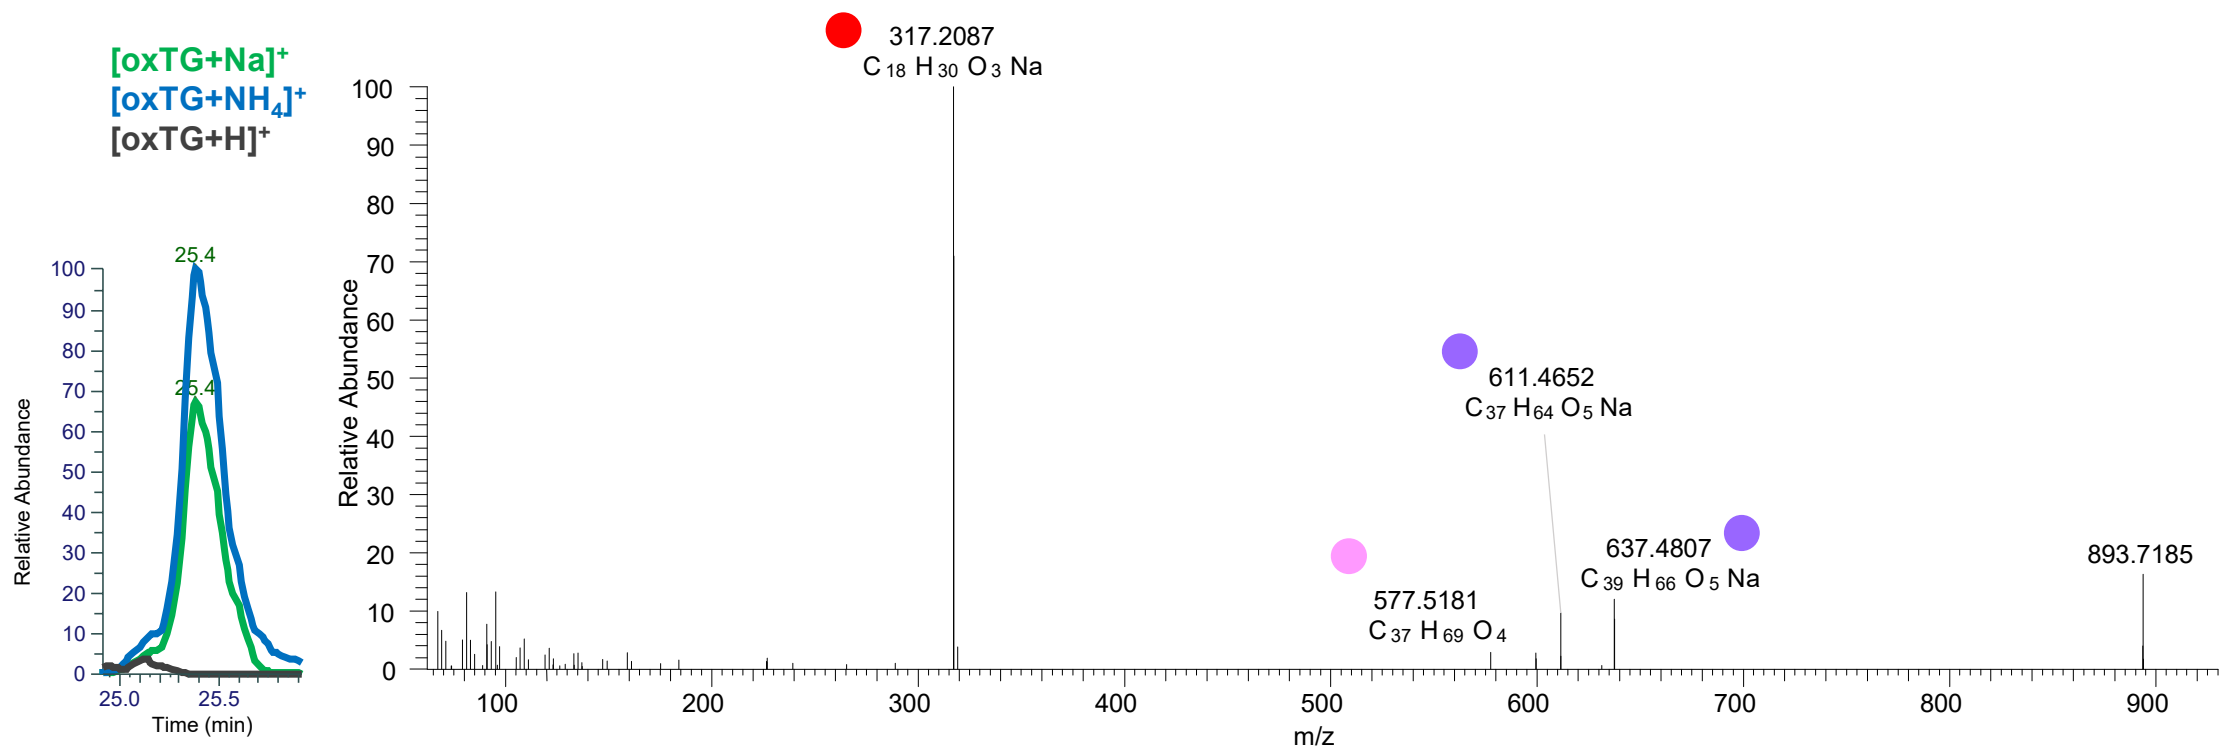

# TG(16:0\_18:1\_18:2<OH>)

RT 23.5

[oxTG+Na]<sup>+</sup>

XIC 895.7361 NL: 6.83E5

- Fragments containing oxFAs
- Fragments related to water loss
- Fragments not containing oxFAs
- Fragments related to other oxLPPs
- Position-specific fragments
- Fragments related to FA loss
- Fragments related to oxFA loss

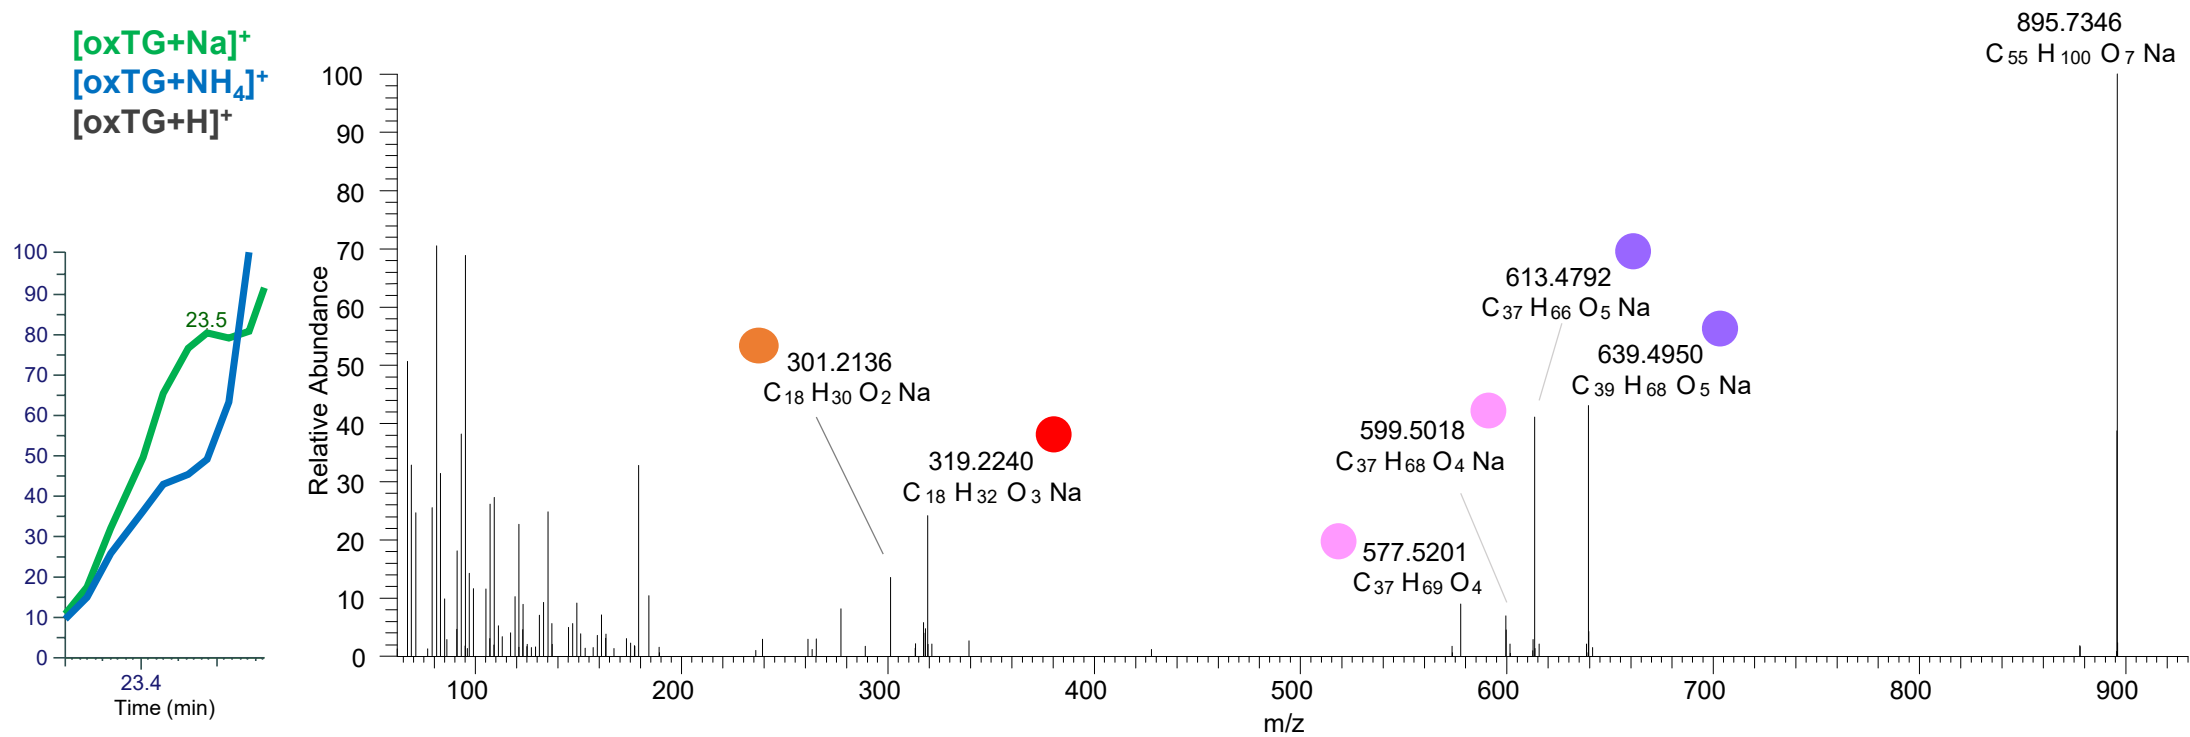

TG(16:0\_18:1\_18:2<O>)  
TG(16:0\_18:0\_18:3<O>)  
RT 24.7

[oxTG+Na]<sup>+</sup>

XIC 895.7361 NL: 8.14E4

- Fragments containing oxFAs
- Fragments related to water loss
- Fragments not containing oxFAs
- Fragments related to other oxLPPs
- Position-specific fragments
- Fragments related to FA loss
- Fragments related to oxFA loss

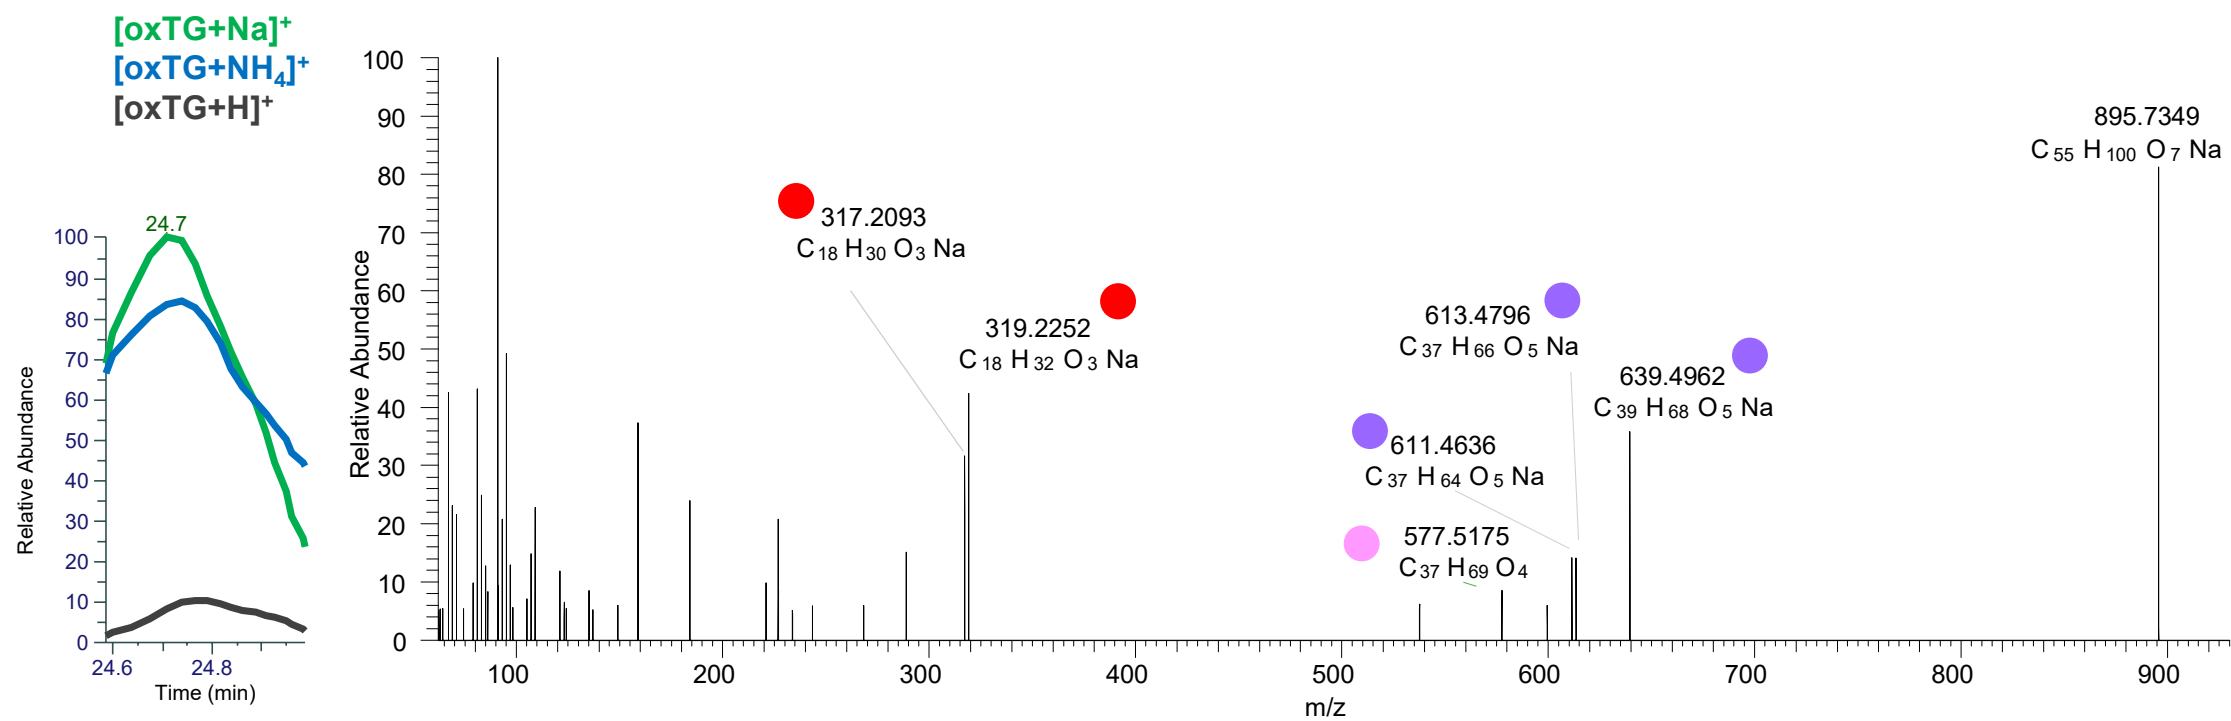

# TG(16:0\_18:1\_18:1<OH>)

RT 24.1

[oxTG+Na]<sup>+</sup>

XIC 897.7517 NL: 3.43E5

- Fragments containing oxFAs
- Fragments related to water loss
- Fragments not containing oxFAs
- Fragments related to other oxLPPs
- Position-specific fragments
- Fragments related to FA loss
- Fragments related to oxFA loss

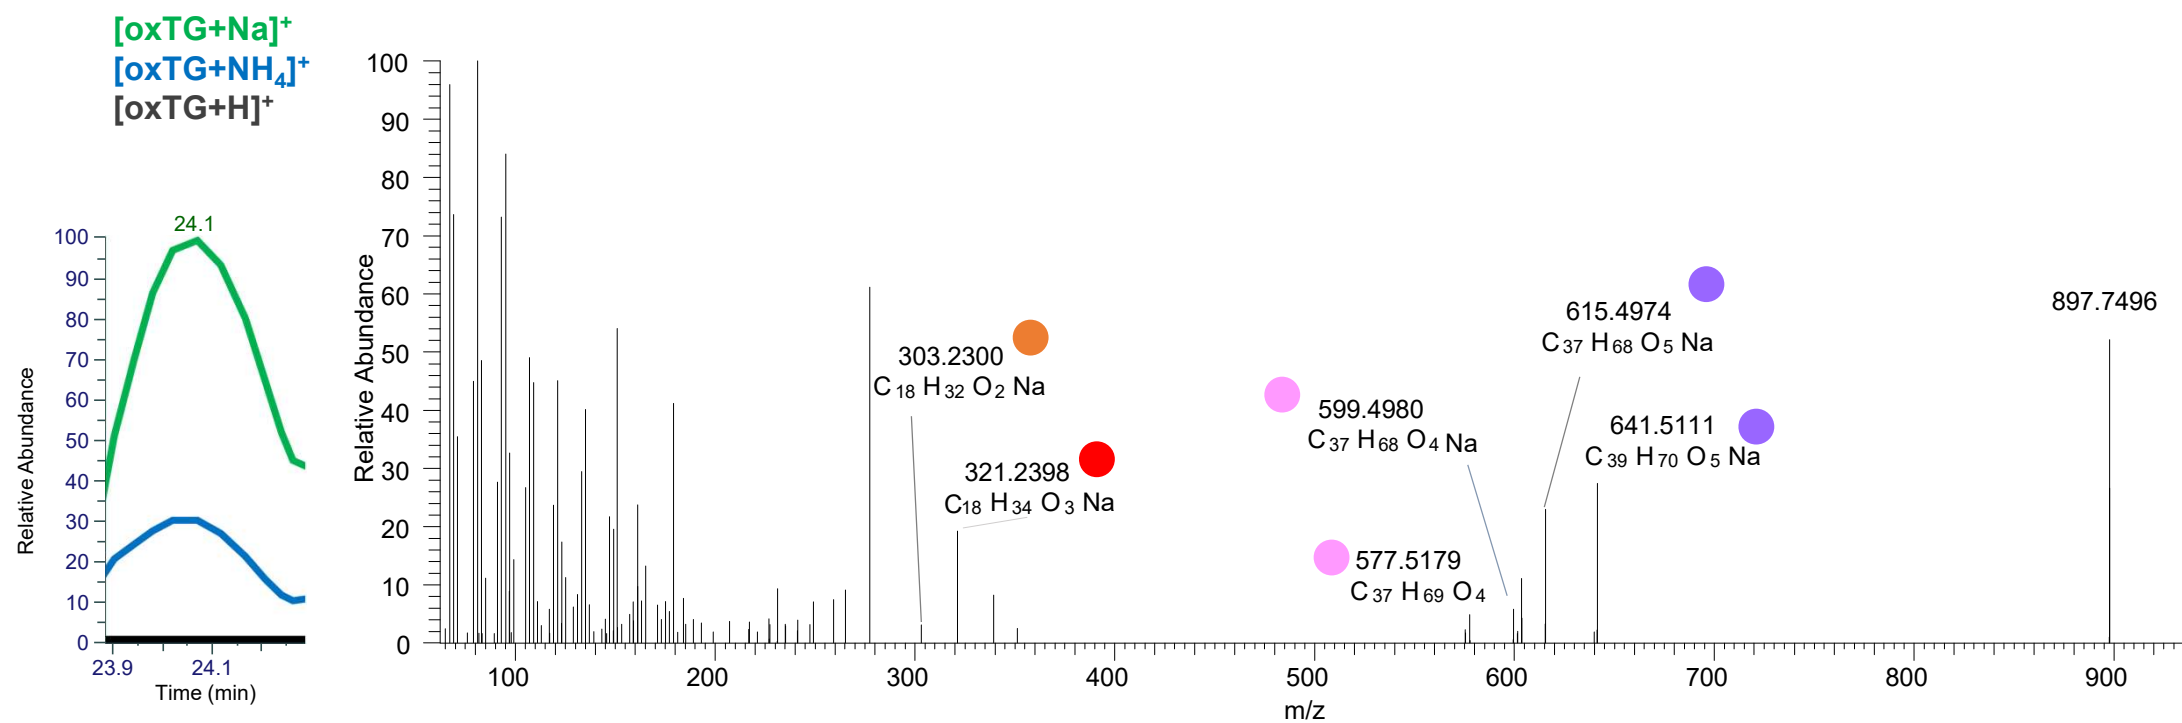

# TG(16:0\_18:0\_18:2<OH>)

RT 24.3

[oxTG+Na]<sup>+</sup>

XIC 897.7517 NL: 3.43E5

- Fragments containing oxFAs
- Fragments related to water loss
- Fragments not containing oxFAs
- Fragments related to other oxLPPs
- Position-specific fragments
- Fragments related to FA loss
- Fragments related to oxFA loss

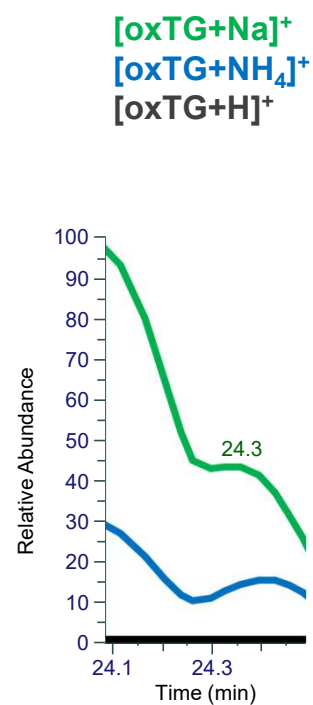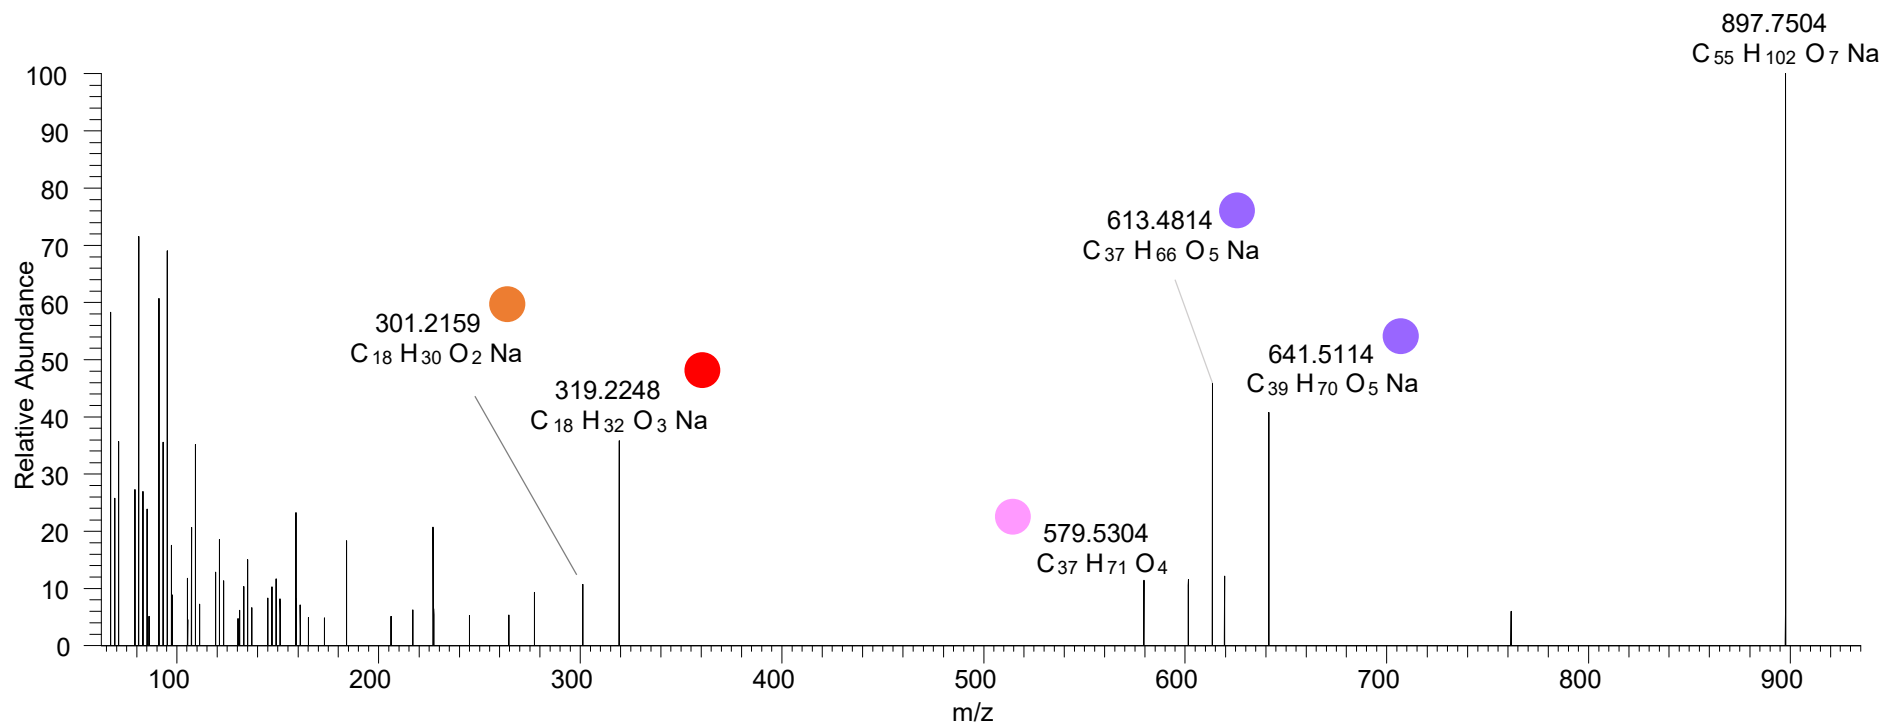

# TG(16:0\_18:0\_18:2<O>)

RT 24.6

[oxTG+Na]<sup>+</sup>

XIC 897.7517 NL: 3.43E5

- Fragments containing oxFAs
- Fragments related to water loss
- Fragments not containing oxFAs
- Fragments related to other oxLPPs
- Position-specific fragments
- Fragments related to FA loss
- Fragments related to oxFA loss

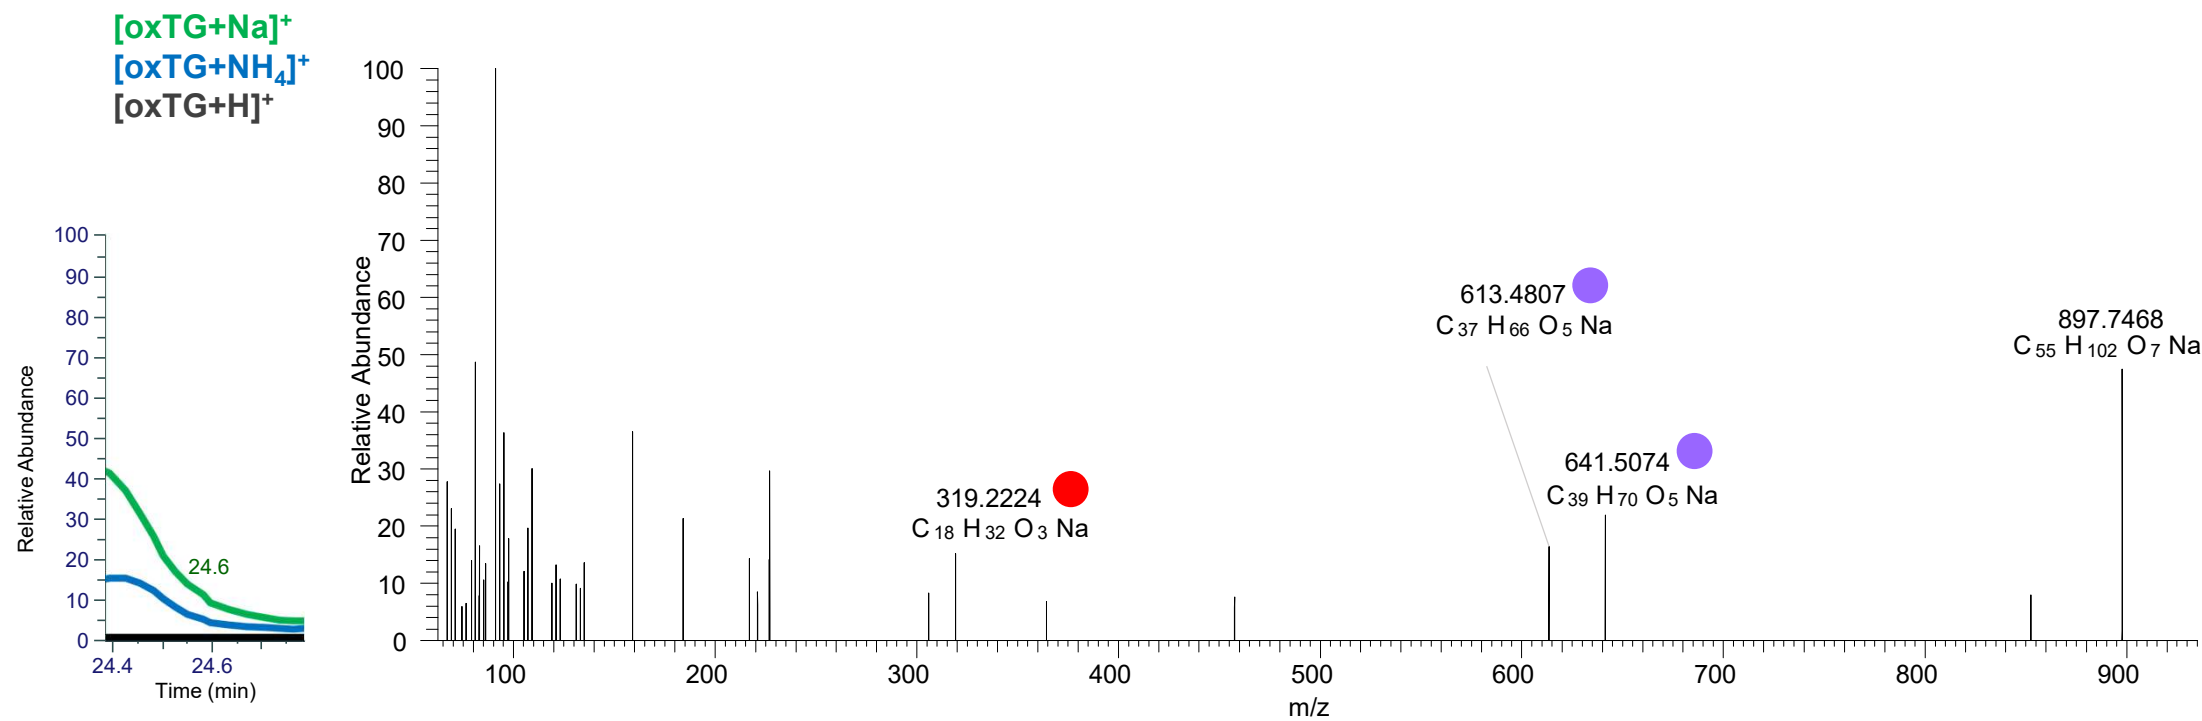

# TG(16:0\_18:3\_18:1<2OH>)

RT 20.1

[oxTG+Na]<sup>+</sup>

XIC 909.7154 NL: 2.99E5

- Fragments containing oxFAs
- Fragments related to water loss
- Fragments not containing oxFAs
- Fragments related to other oxLPPs
- Position-specific fragments
- Fragments related to FA loss
- Fragments related to oxFA loss

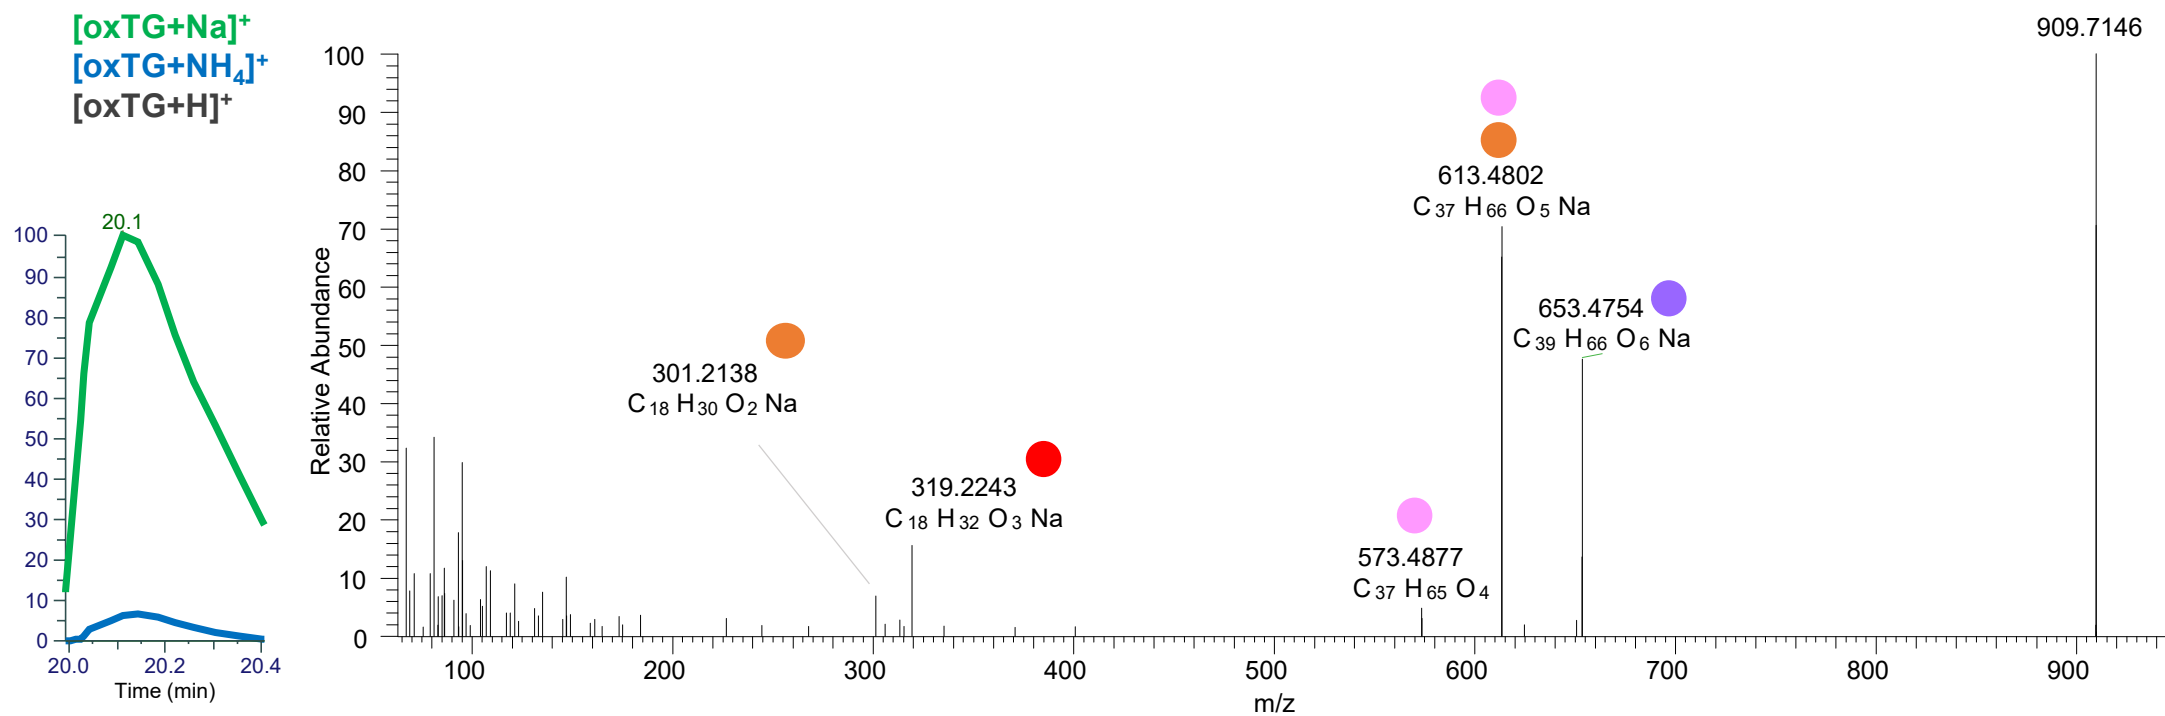



# TG(16:0\_18:1\_18:3<OH,O>)

RT 21.6

[oxTG+Na]<sup>+</sup>

XIC 909.7154 NL: 8.98E4

- Fragments containing oxFAs
- Fragments related to water loss
- Fragments not containing oxFAs
- Fragments related to other oxLPPs
- Position-specific fragments
- Fragments related to FA loss
- Fragments related to oxFA loss

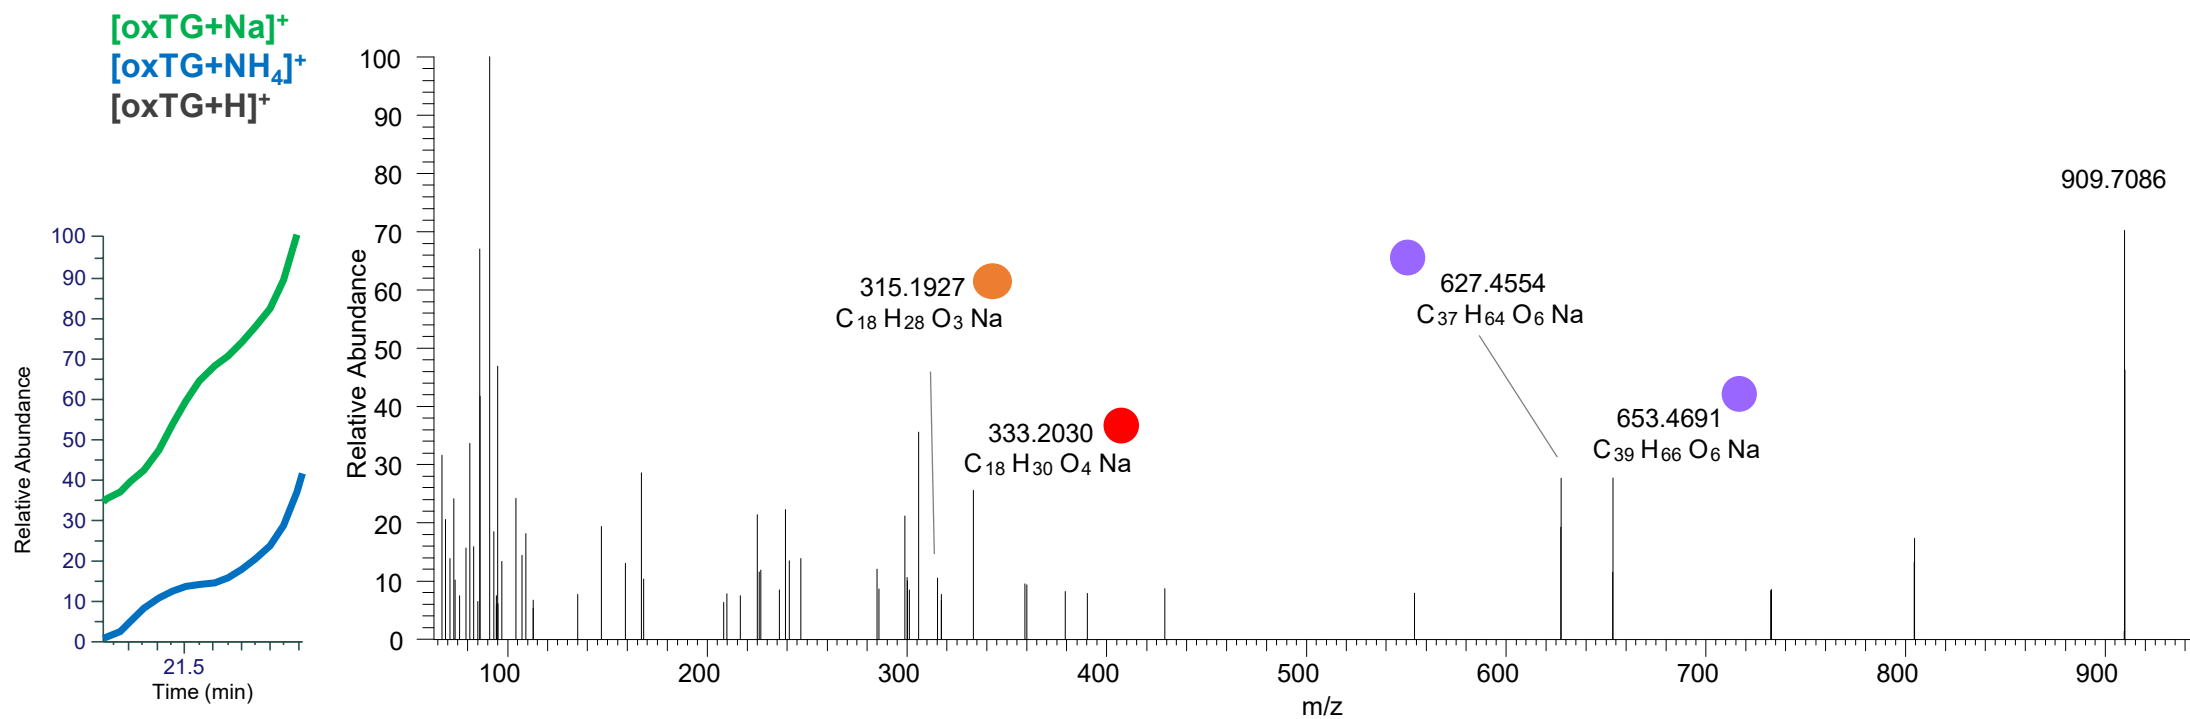

TG(16:0\_18:1\_18:3<2O>)  
TG(16:1\_18:1\_18:2<2O>)  
RT 21.8

[oxTG+Na]<sup>+</sup>

XIC 909.7154 NL: 8.98E4

- Fragments containing oxFAs
- Fragments related to water loss
- Fragments not containing oxFAs
- Fragments related to other oxLPPs
- Position-specific fragments
- Fragments related to FA loss
- Fragments related to oxFA loss

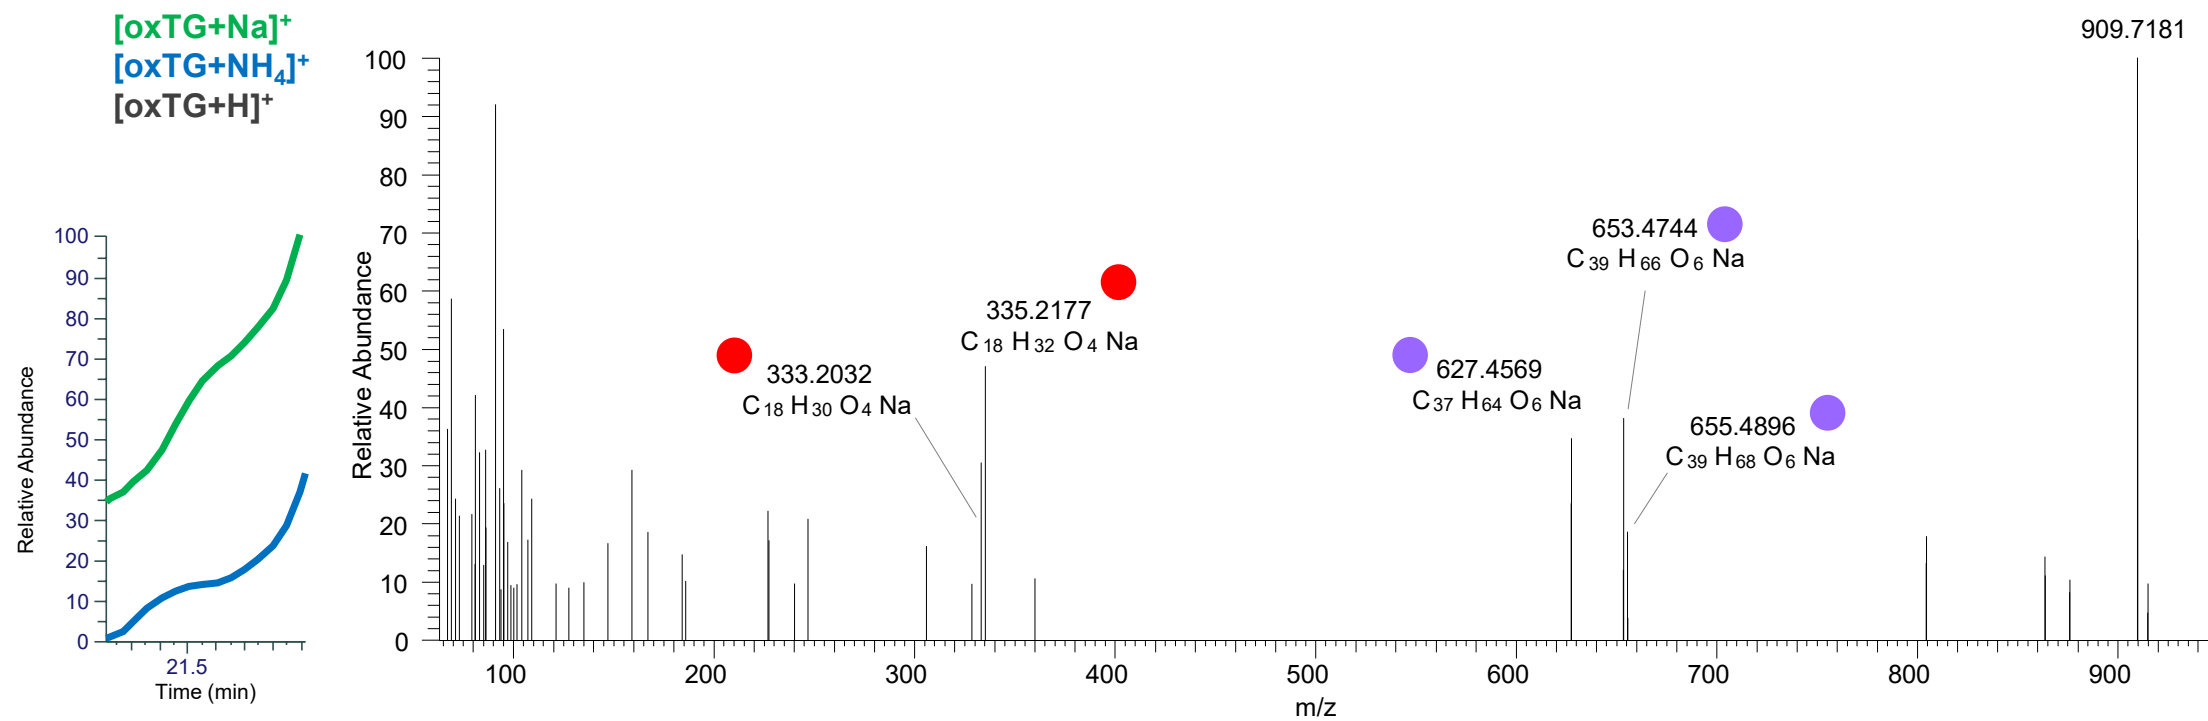

TG(16:1\_18:1\_18:2<2O>)  
 TG(16:0\_18:1\_18:3<2O>)  
 TG(16:0\_18:2\_18:2<2O>)  
 TG(16:0\_16:0\_20:4<2O>)  
 RT 22.1

[oxTG+Na]<sup>+</sup>

XIC 909.7154 NL: 1.18E5

- Fragments containing oxFAs
- Fragments related to water loss
- Fragments not containing oxFAs
- Fragments related to other oxLPPs
- Position-specific fragments
- Fragments related to FA loss
- Fragments related to oxFA loss

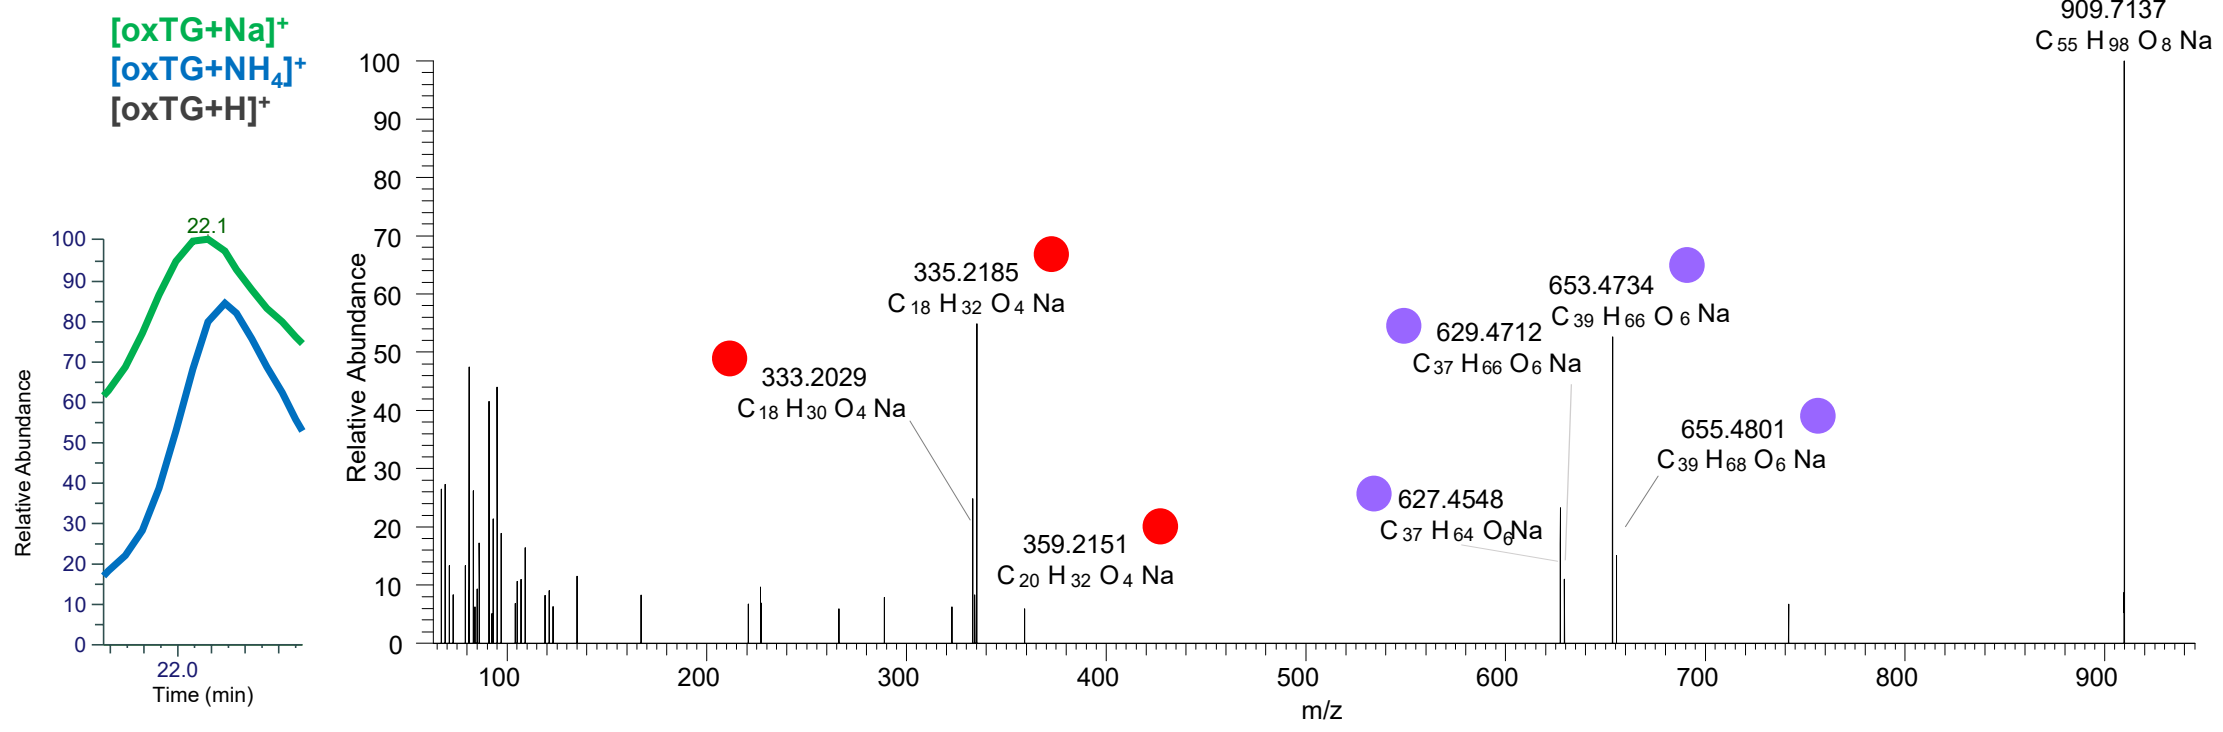

TG(16:0\_18:1\_18:2<OH,ep>)  
TG(16:0\_18:2\_18:1<OH,ep>)  
RT 22.7

[oxTG+Na]<sup>+</sup>

XIC 909.7154 NL: 1.85E6

- Fragments containing oxFAs
- Fragments related to water loss
- Fragments not containing oxFAs
- Fragments related to other oxLPPs
- Position-specific fragments
- Fragments related to FA loss
- Fragments related to oxFA loss

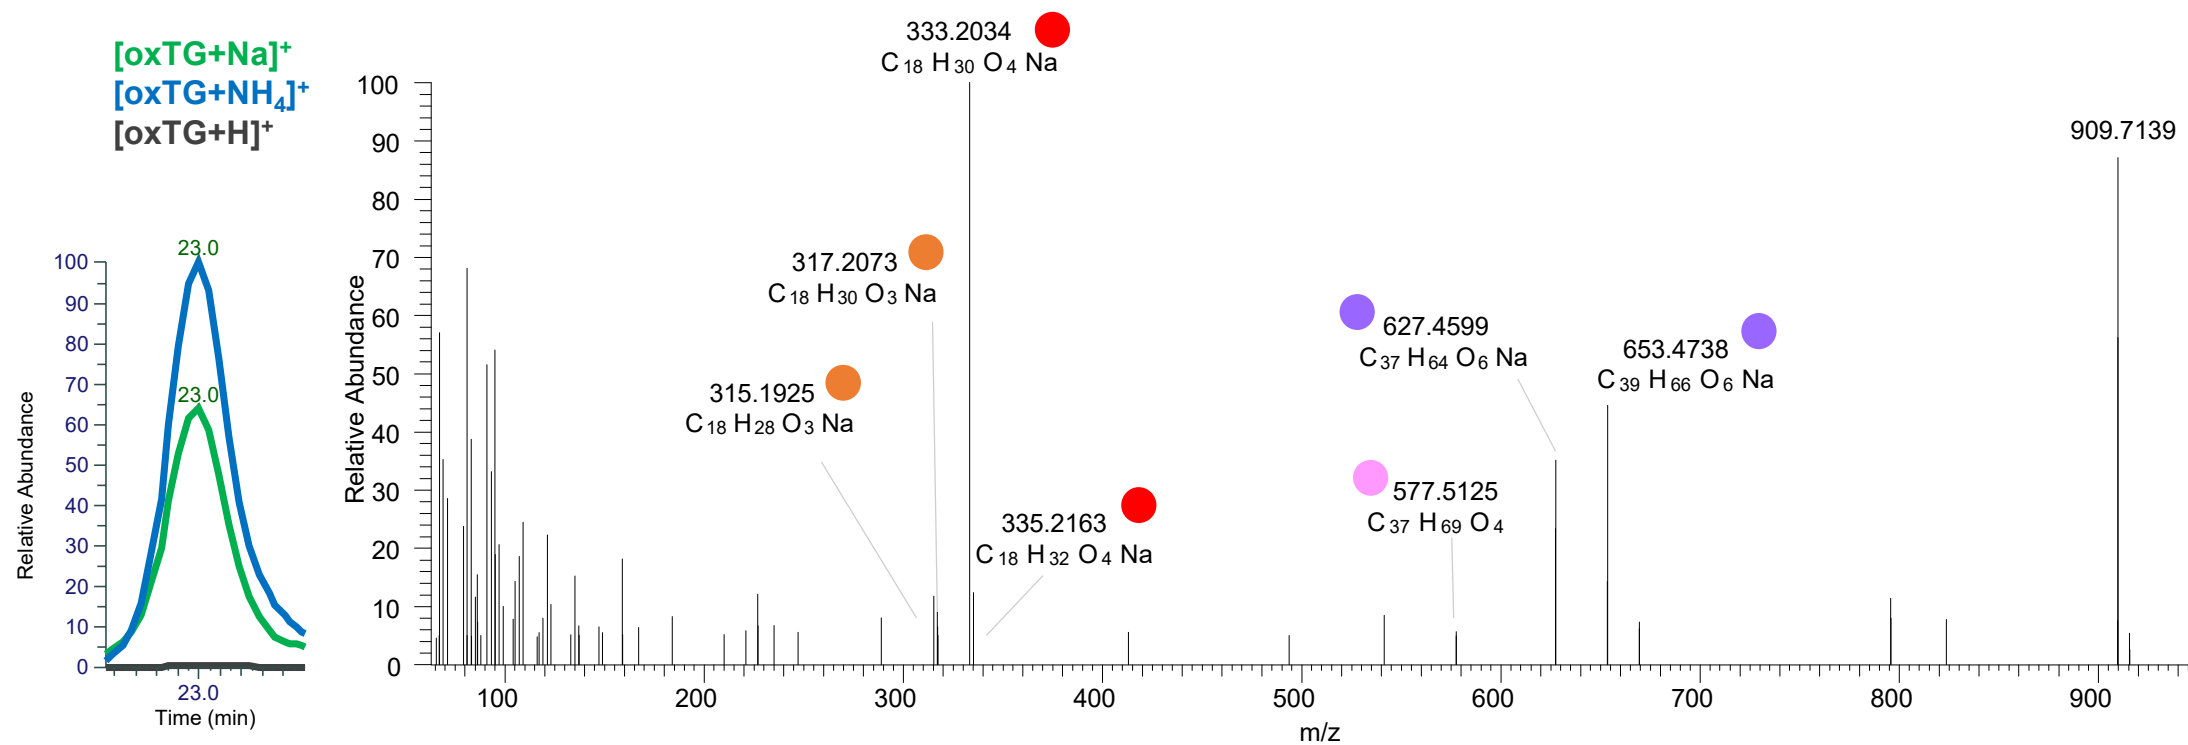

TG(16:0\_18:2\_18:2<OOH{13}>)  
 TG(16:0\_18:1\_18:3<OOH{13}>)  
 TG(16:1\_18:1\_18:2<OOH{13}>)  
 RT 23.0

[oxTG+Na]<sup>+</sup>

XIC 909.7154 NL: 1.85E6

- Fragments containing oxFAs
- Fragments related to water loss
- Fragments not containing oxFAs
- Fragments related to other oxLPPs
- Position-specific fragments
- Fragments related to FA loss
- Fragments related to oxFA loss

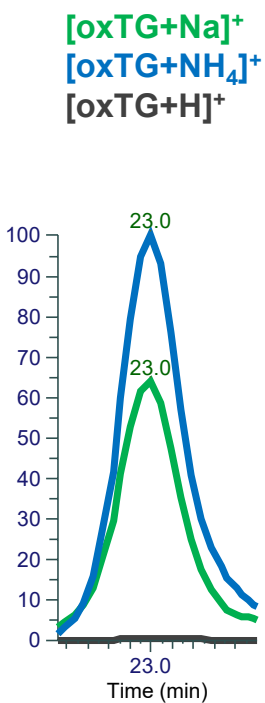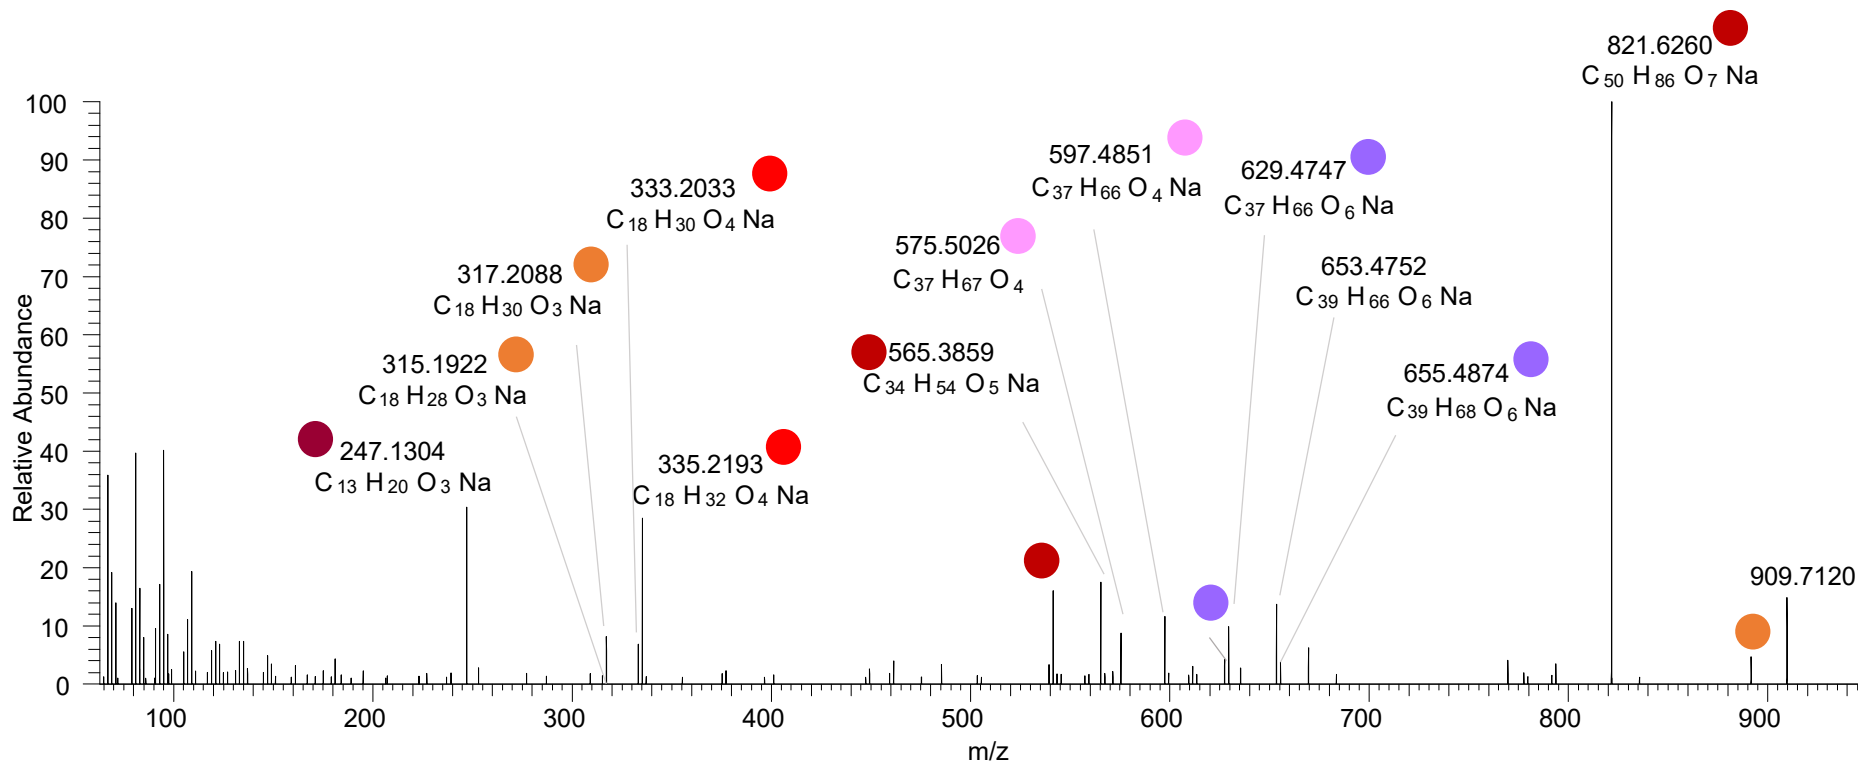

# TG(16:0\_18:1\_18:1<OH,ep>)

## RT 22.7

[oxTG+Na]<sup>+</sup>

XIC 911.7310 NL: 1.44E5

- Fragments containing oxFAs
- Fragments related to water loss
- Fragments not containing oxFAs
- Fragments related to other oxLPPs
- Position-specific fragments
- Fragments related to FA loss
- Fragments related to oxFA loss

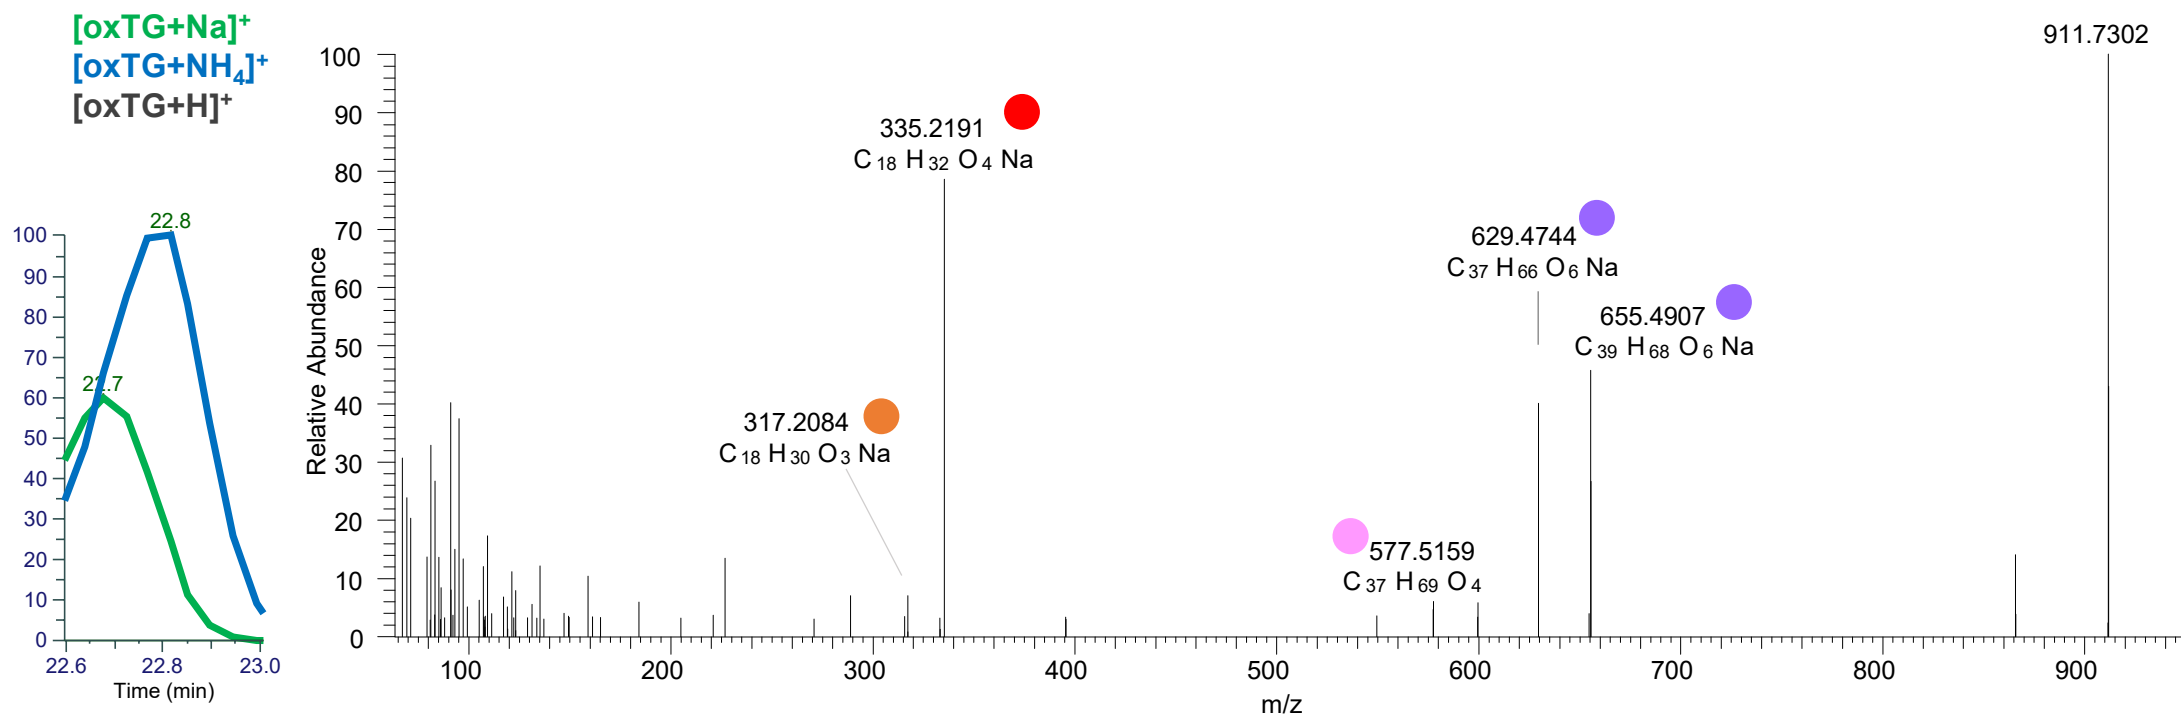

TG(16:0\_18:1\_18:2<OOH{11}>)  
TG(16:0\_18:1\_18:2<OOH{13}>)  
RT 23.3

[oxTG+Na]<sup>+</sup>

XIC 911.7310 NL: 4.23E6

- Fragments containing oxFAs
- Fragments related to water loss
- Fragments not containing oxFAs
- Fragments related to other oxLPPs
- Position-specific fragments
- Fragments related to FA loss
- Fragments related to oxFA loss

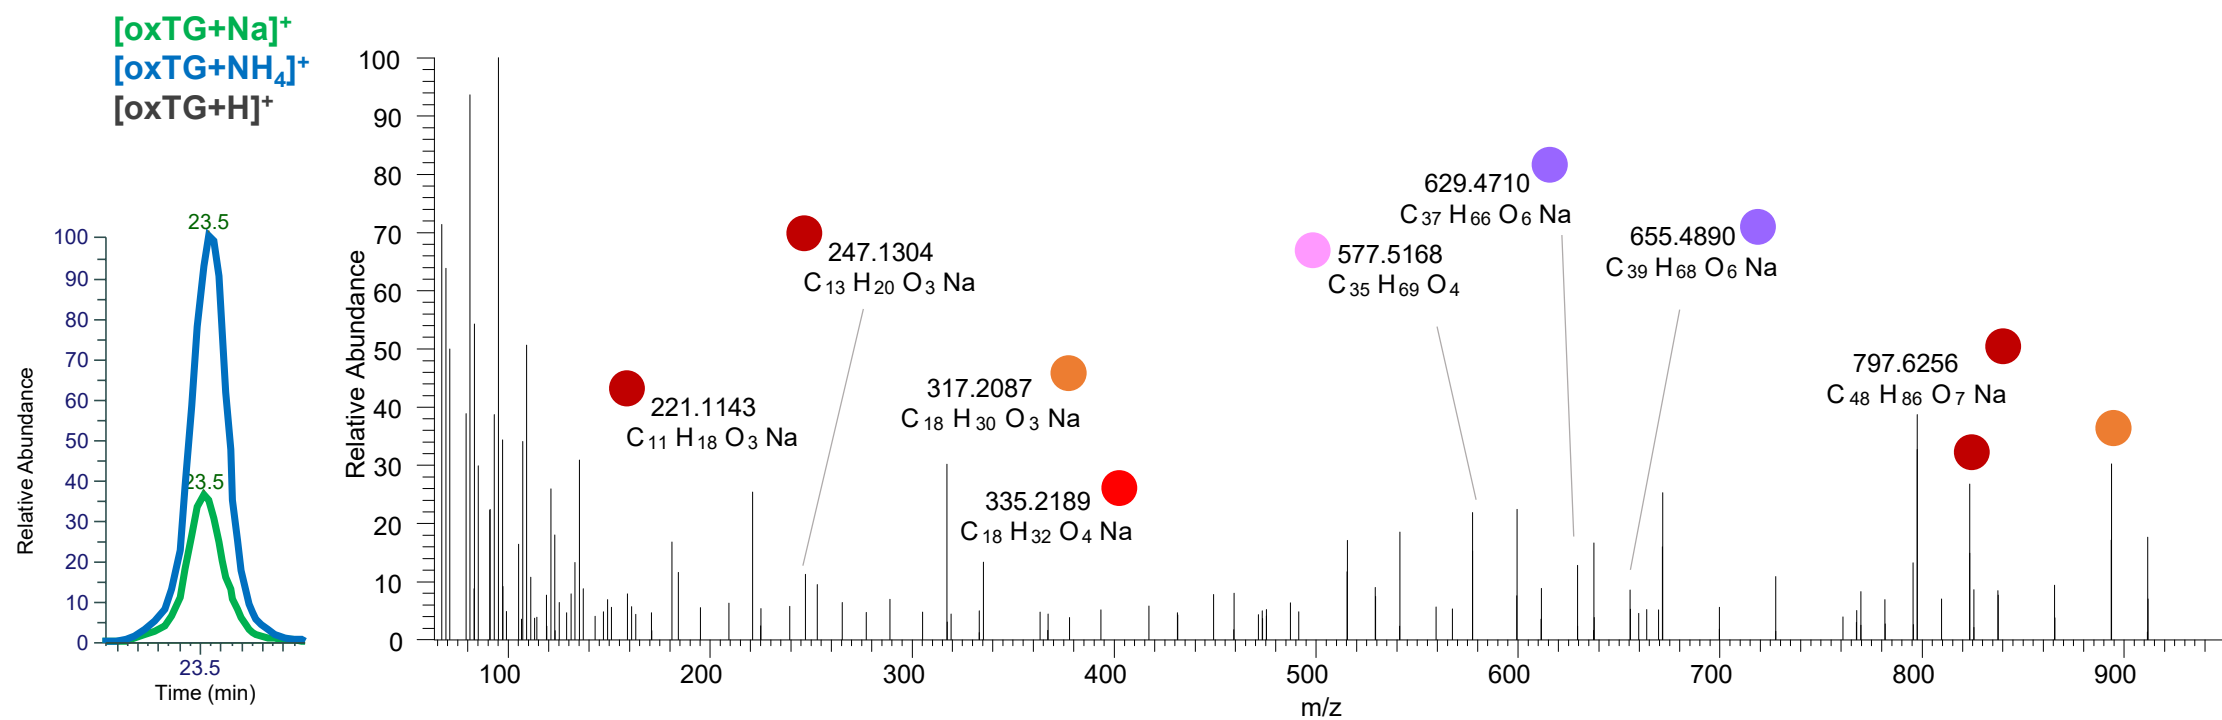

# TG(16:0\_18:1\_18:2<OOH{13}>)

RT 23.5

[oxTG+Na]<sup>+</sup>

XIC 911.7310 NL: 4.23E6

- Fragments containing oxFAs
- Fragments related to water loss
- Fragments not containing oxFAs
- Fragments related to other oxLPPs
- Position-specific fragments
- Fragments related to FA loss
- Fragments related to oxFA loss

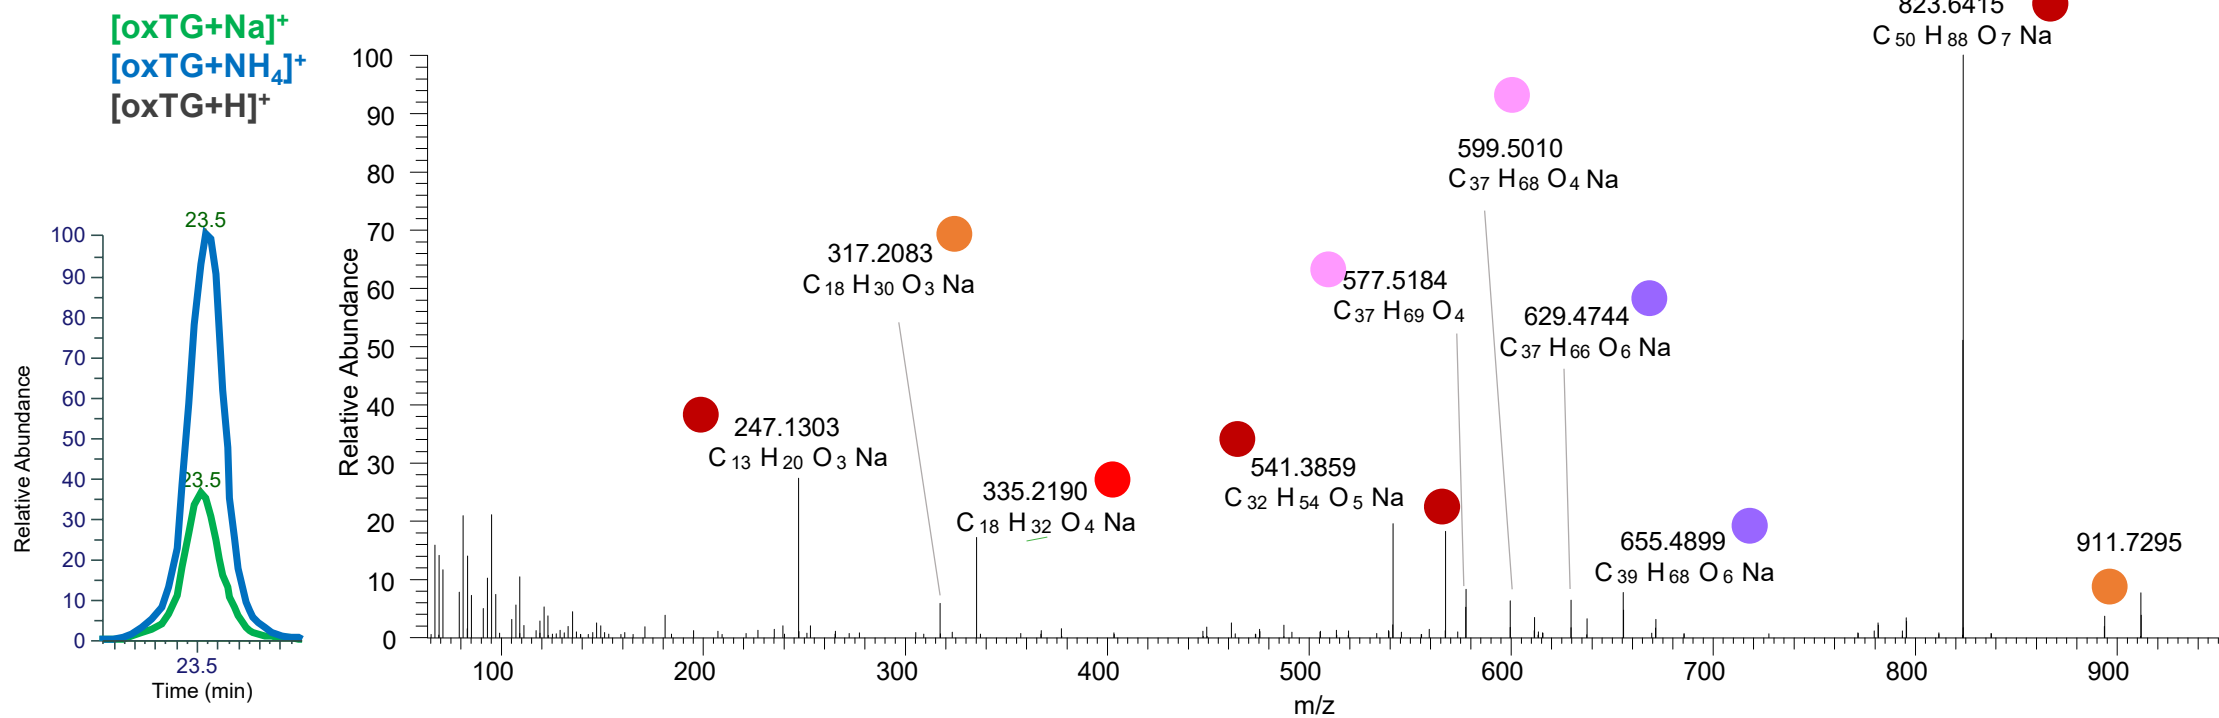



TG(16:0\_18:1\_18:2<OOH{9}>)  
 TG(16:0\_18:1\_18:2<OOH{13}>)  
 RT 23.7

[oxTG+Na]<sup>+</sup>

XIC 911.7310 NL: 4.23E6

- Fragments containing oxFAs
- Fragments related to water loss
- Fragments not containing oxFAs
- Fragments related to other oxLPPs
- Position-specific fragments
- Fragments related to FA loss
- Fragments related to oxFA loss

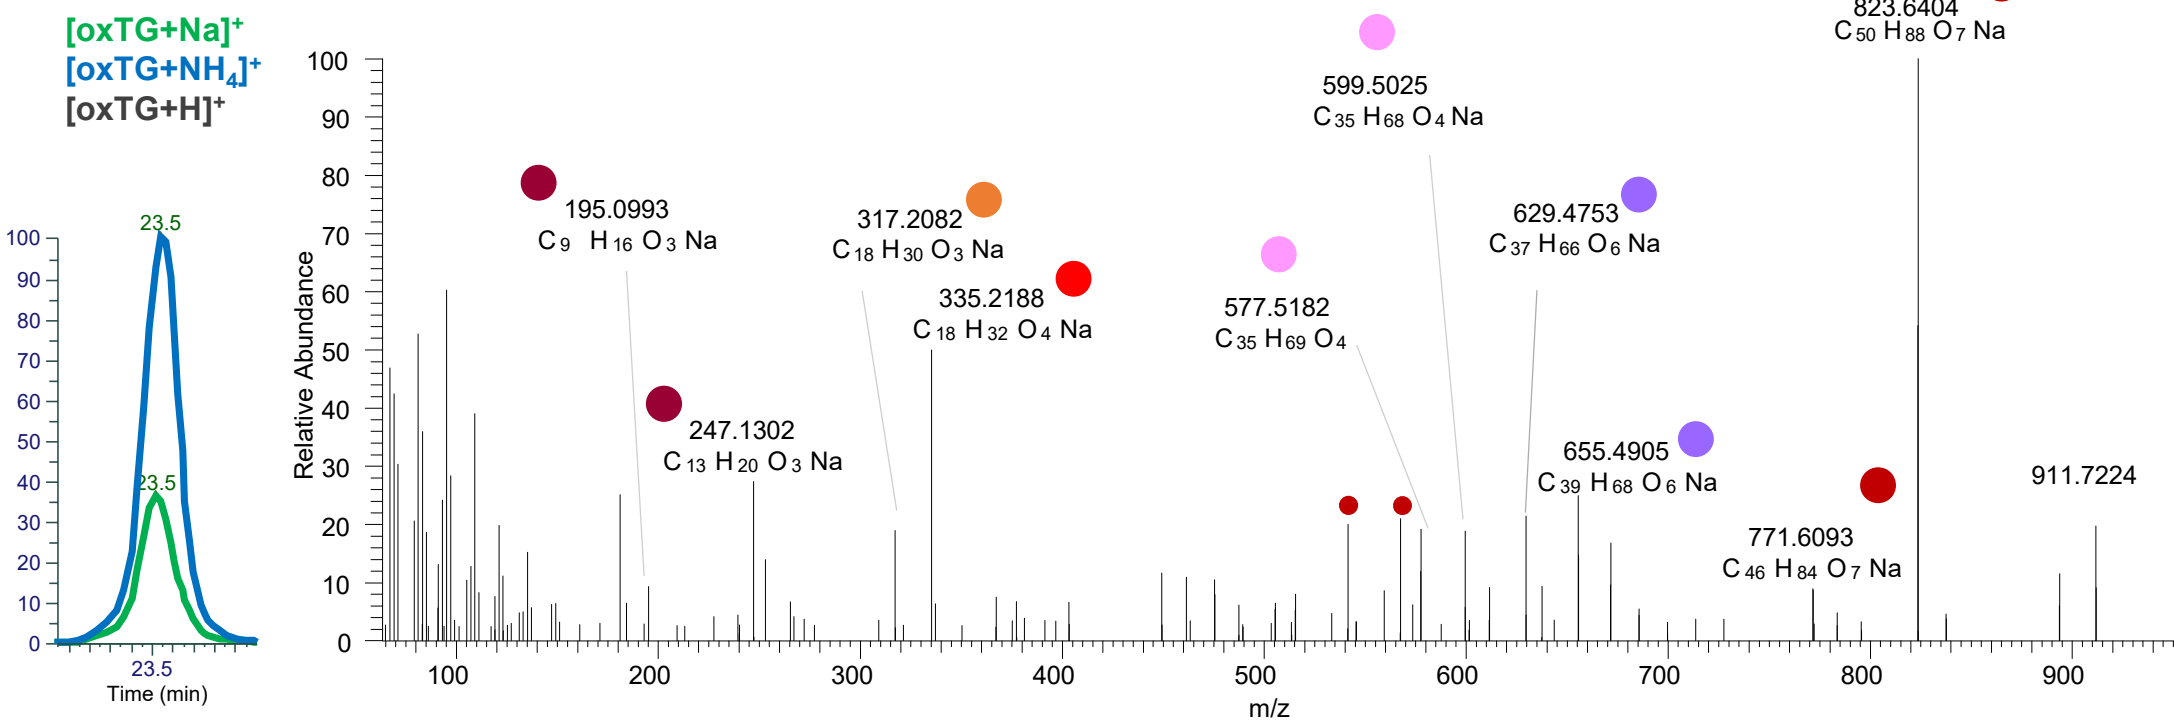

# TG(16:0\_18:0\_18:2<OOH{13}>)

RT 24.3

[oxTG+Na]<sup>+</sup>

XIC 913.7467 NL: 1.32E5

- Fragments containing oxFAs
- Fragments related to water loss
- Fragments not containing oxFAs
- Fragments related to other oxLPPs
- Position-specific fragments
- Fragments related to FA loss
- Fragments related to oxFA loss

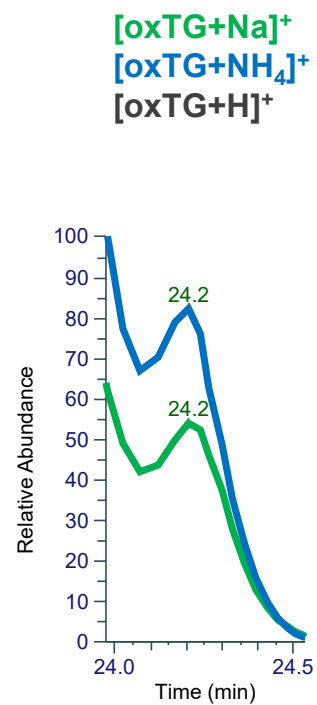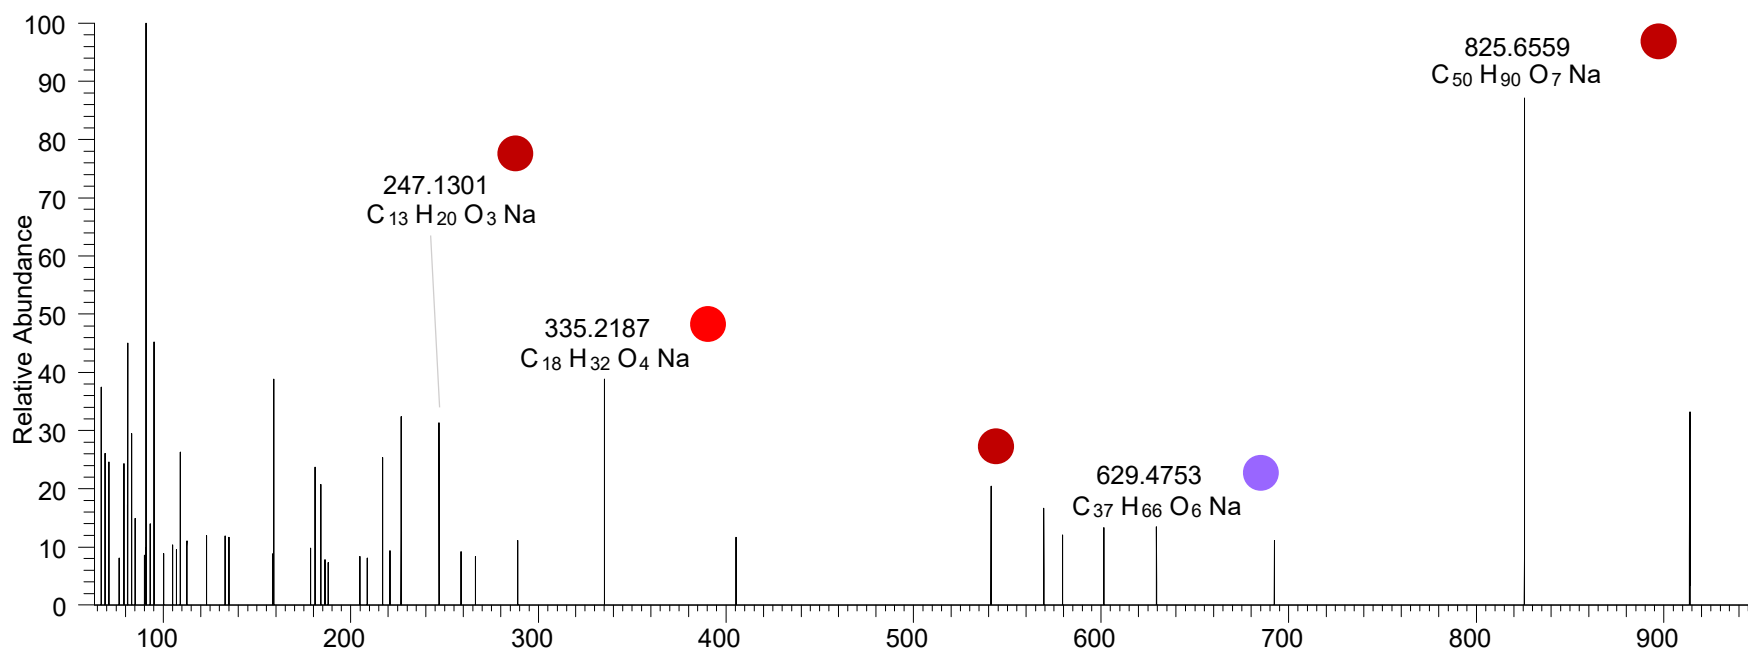

# TG(18:2\_18:2\_18:2<OH>)

RT 22.6

[oxTG+Na]<sup>+</sup>

XIC 917.7204 NL: 3.82E5

- Fragments containing oxFAs
- Fragments related to water loss
- Fragments not containing oxFAs
- Fragments related to other oxLPPs
- Position-specific fragments
- Fragments related to FA loss
- Fragments related to oxFA loss

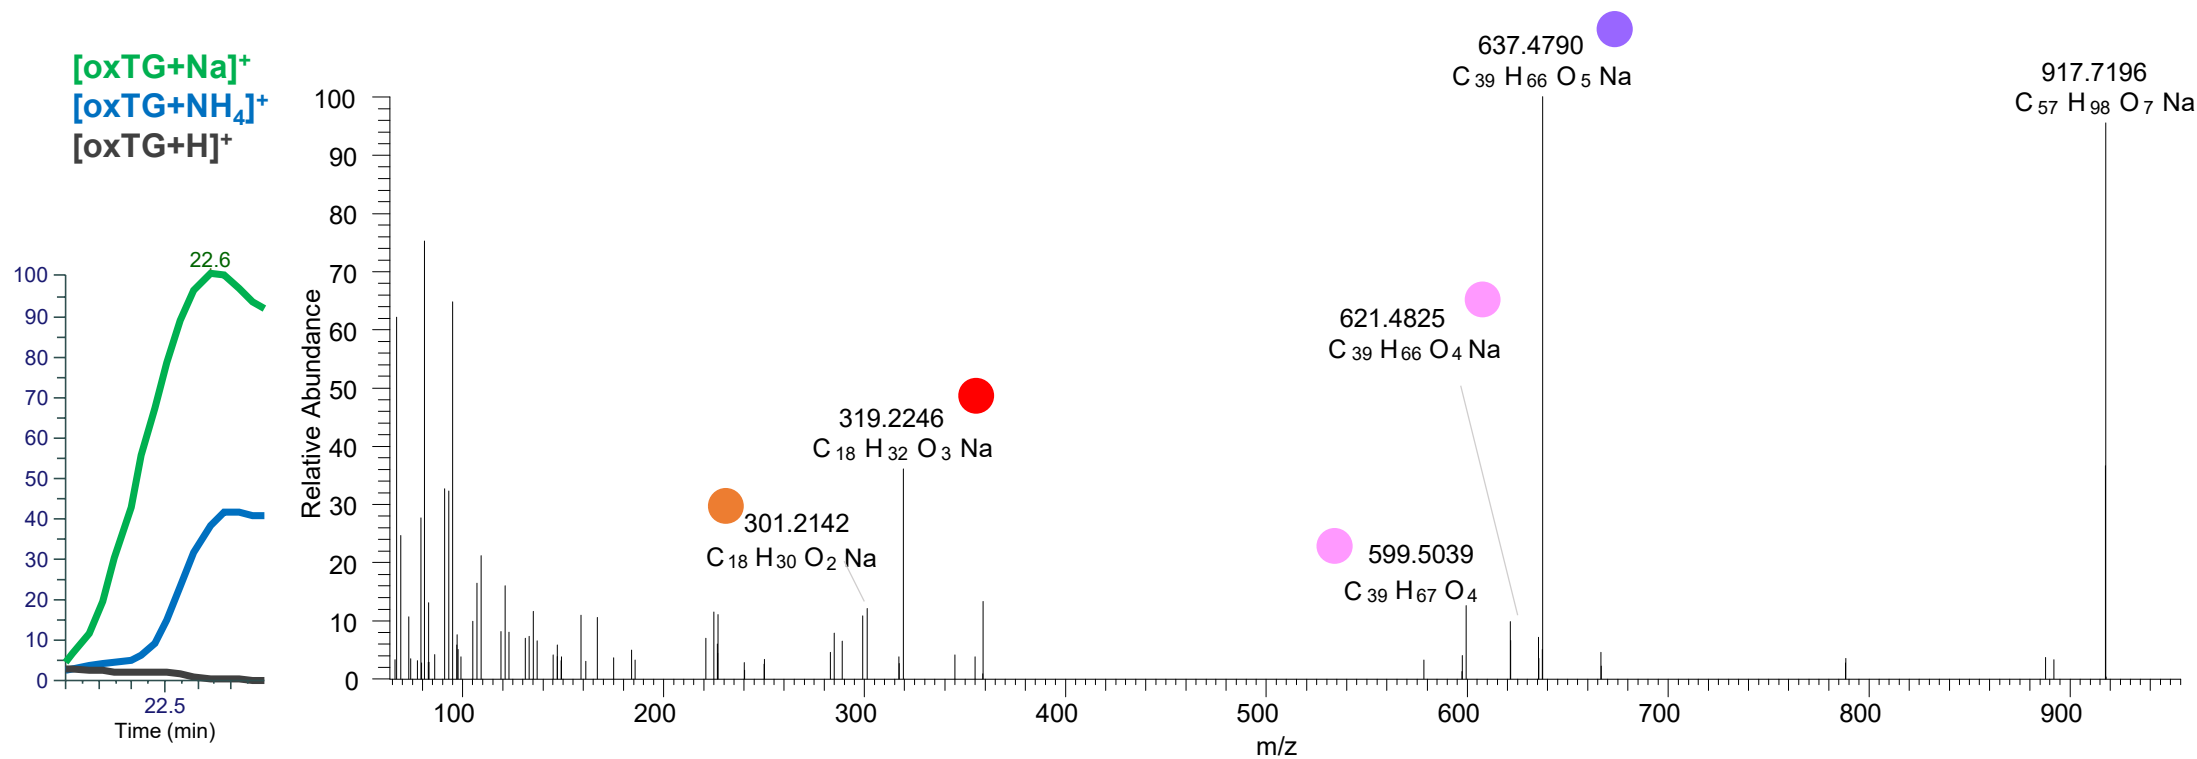

TG(18:2\_18:2\_18:2<O>)  
TG(18:1\_18:2\_18:3<OH>)  
RT 23.0

[oxTG+Na]<sup>+</sup>

XIC 917.7204 NL: 3.53E5

- Fragments containing oxFAs
- Fragments related to water loss
- Fragments not containing oxFAs
- Fragments related to other oxLPPs
- Position-specific fragments
- Fragments related to FA loss
- Fragments related to oxFA loss

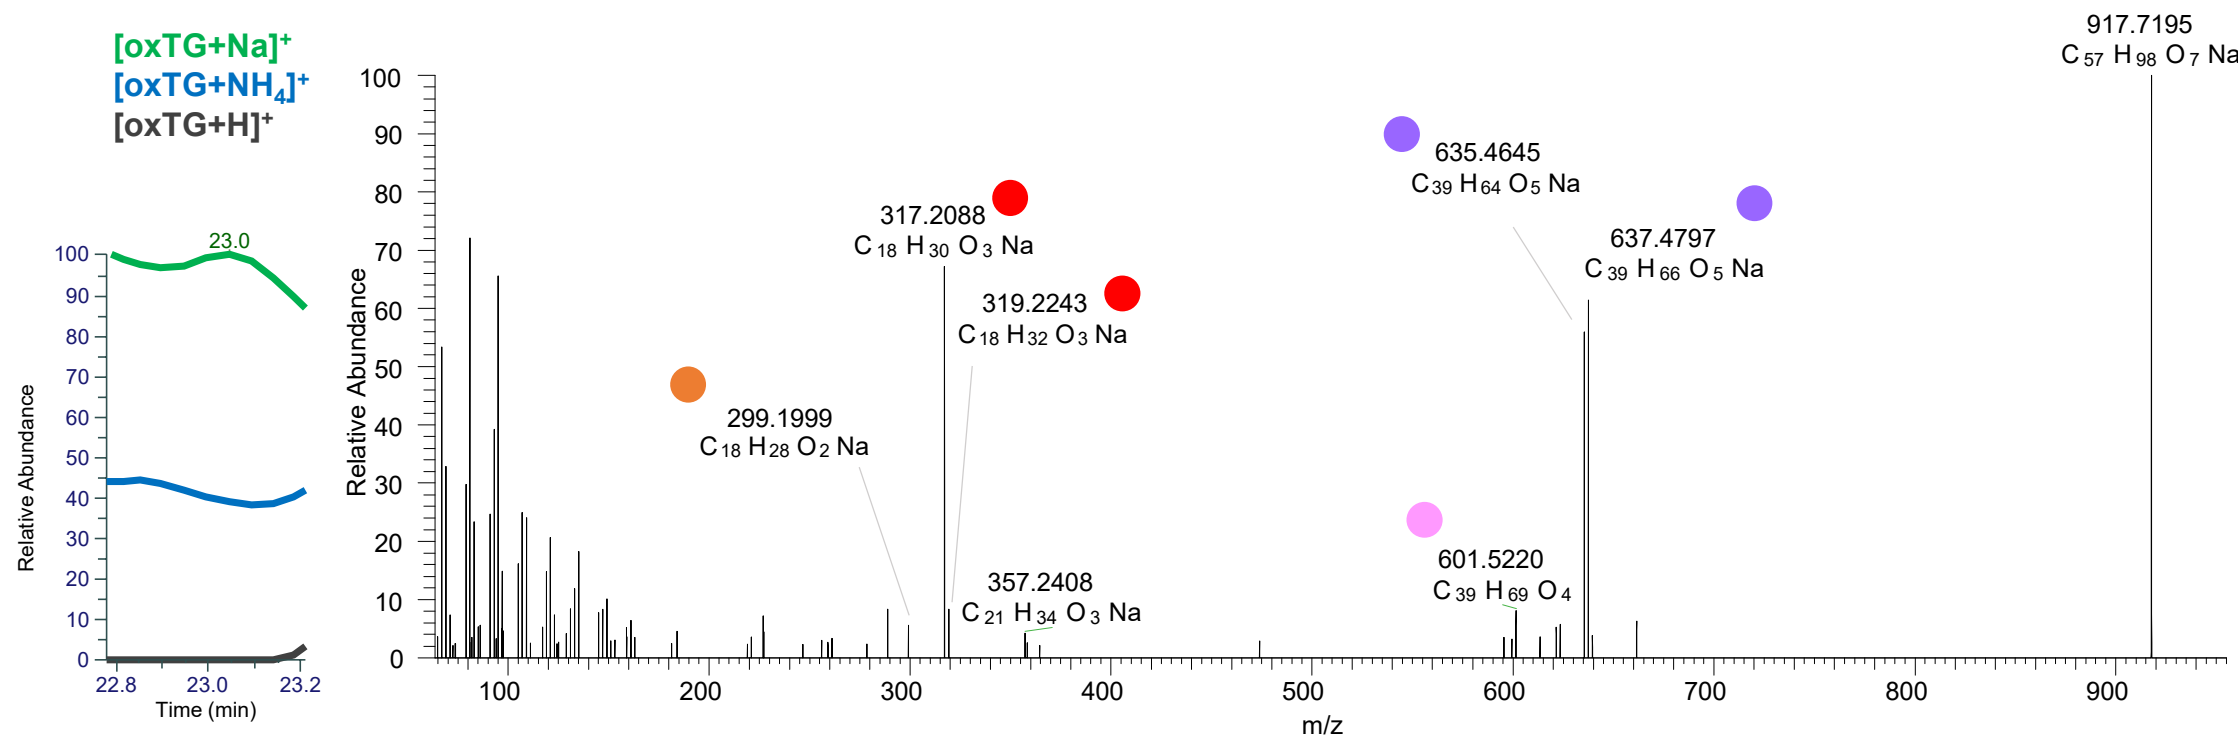

TG(18:1\_18:2\_18:2<ep>)  
TG(18:1\_18:2\_18:2<oxo>)  
RT 24.7

[oxTG+Na]<sup>+</sup>

XIC 917.7204 NL: 1.08E5

- Fragments containing oxFAs
- Fragments related to water loss
- Fragments not containing oxFAs
- Fragments related to other oxLPPs
- Position-specific fragments
- Fragments related to FA loss
- Fragments related to oxFA loss

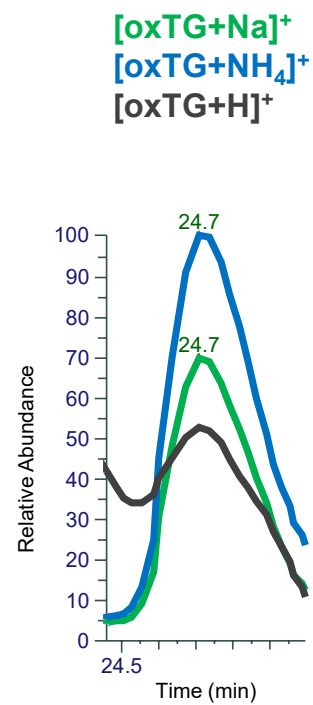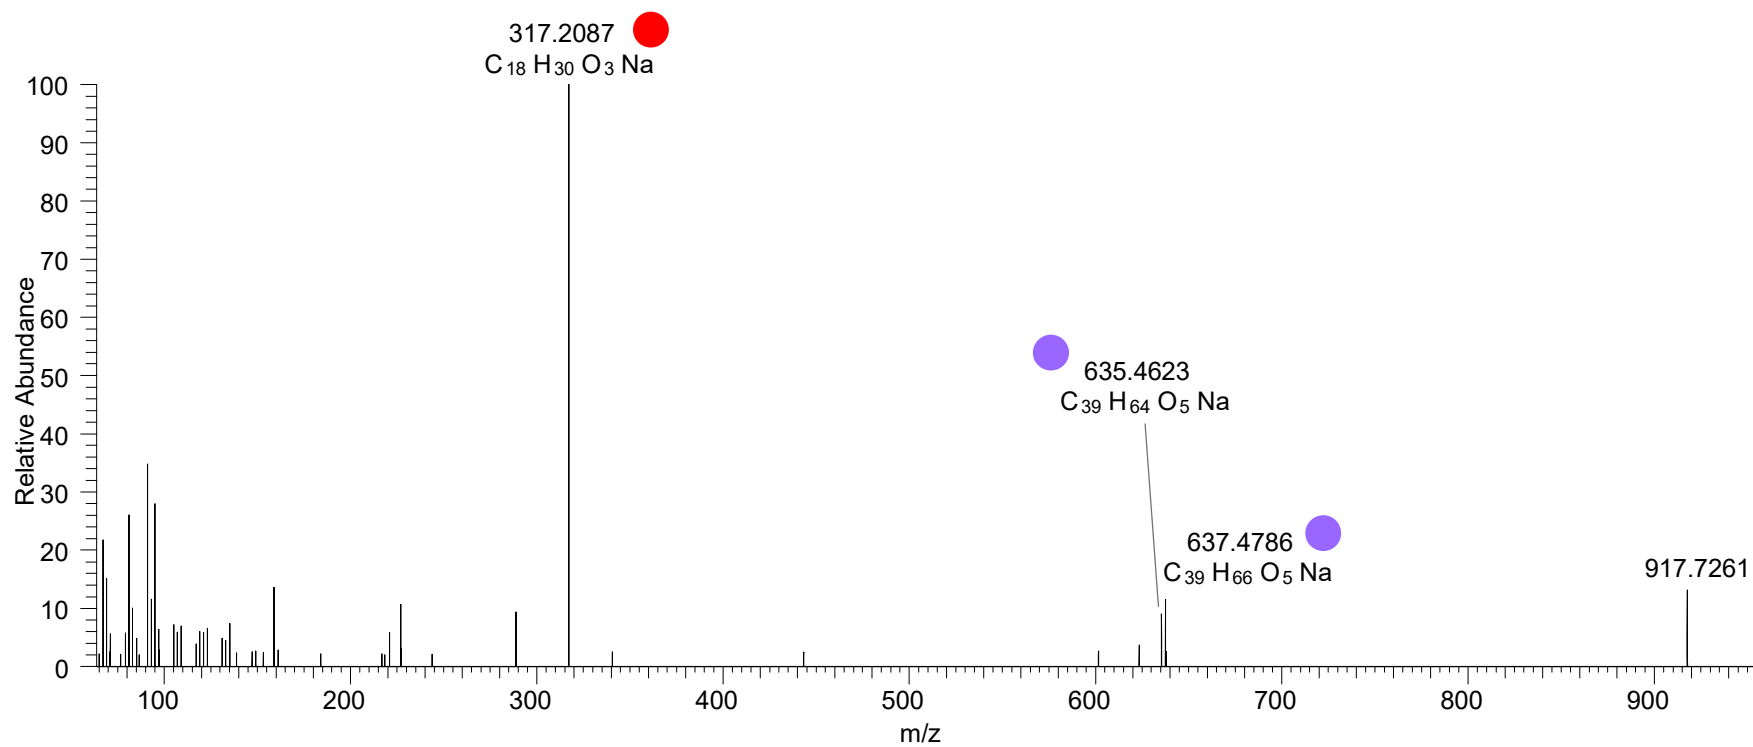

# TG(18:1\_18:2\_18:2<OH>)

RT 23.2

[oxTG+Na]<sup>+</sup>

XIC 919.7361 NL: 1.09E6

- Fragments containing oxFAs
- Fragments related to water loss
- Fragments not containing oxFAs
- Fragments related to other oxLPPs
- Position-specific fragments
- Fragments related to FA loss
- Fragments related to oxFA loss

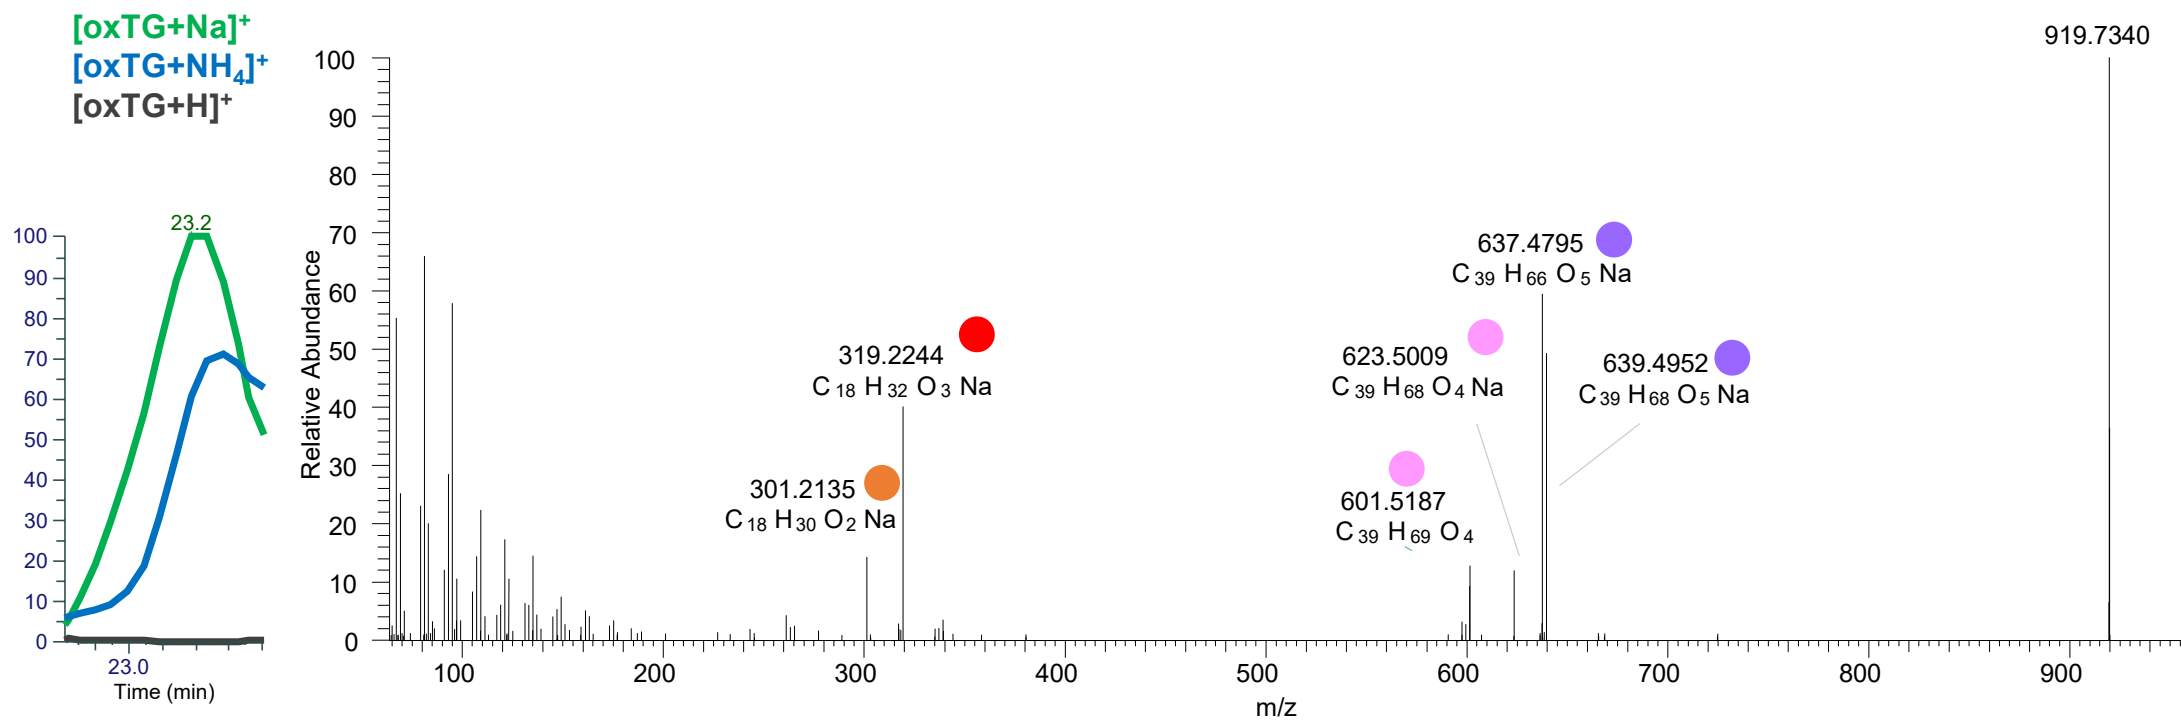

TG(18:1\_18:2\_18:2<O>)  
 TG(18:1\_18:1\_18:3<O>)  
 TG(16:0\_18:2\_20:3<O>)  
 RT 23.3

[oxTG+Na]<sup>+</sup>

XIC 919.7361 NL: 1.09E6

- Fragments containing oxFAs
- Fragments related to water loss
- Fragments not containing oxFAs
- Fragments related to other oxLPPs
- Position-specific fragments
- Fragments related to FA loss
- Fragments related to oxFA loss

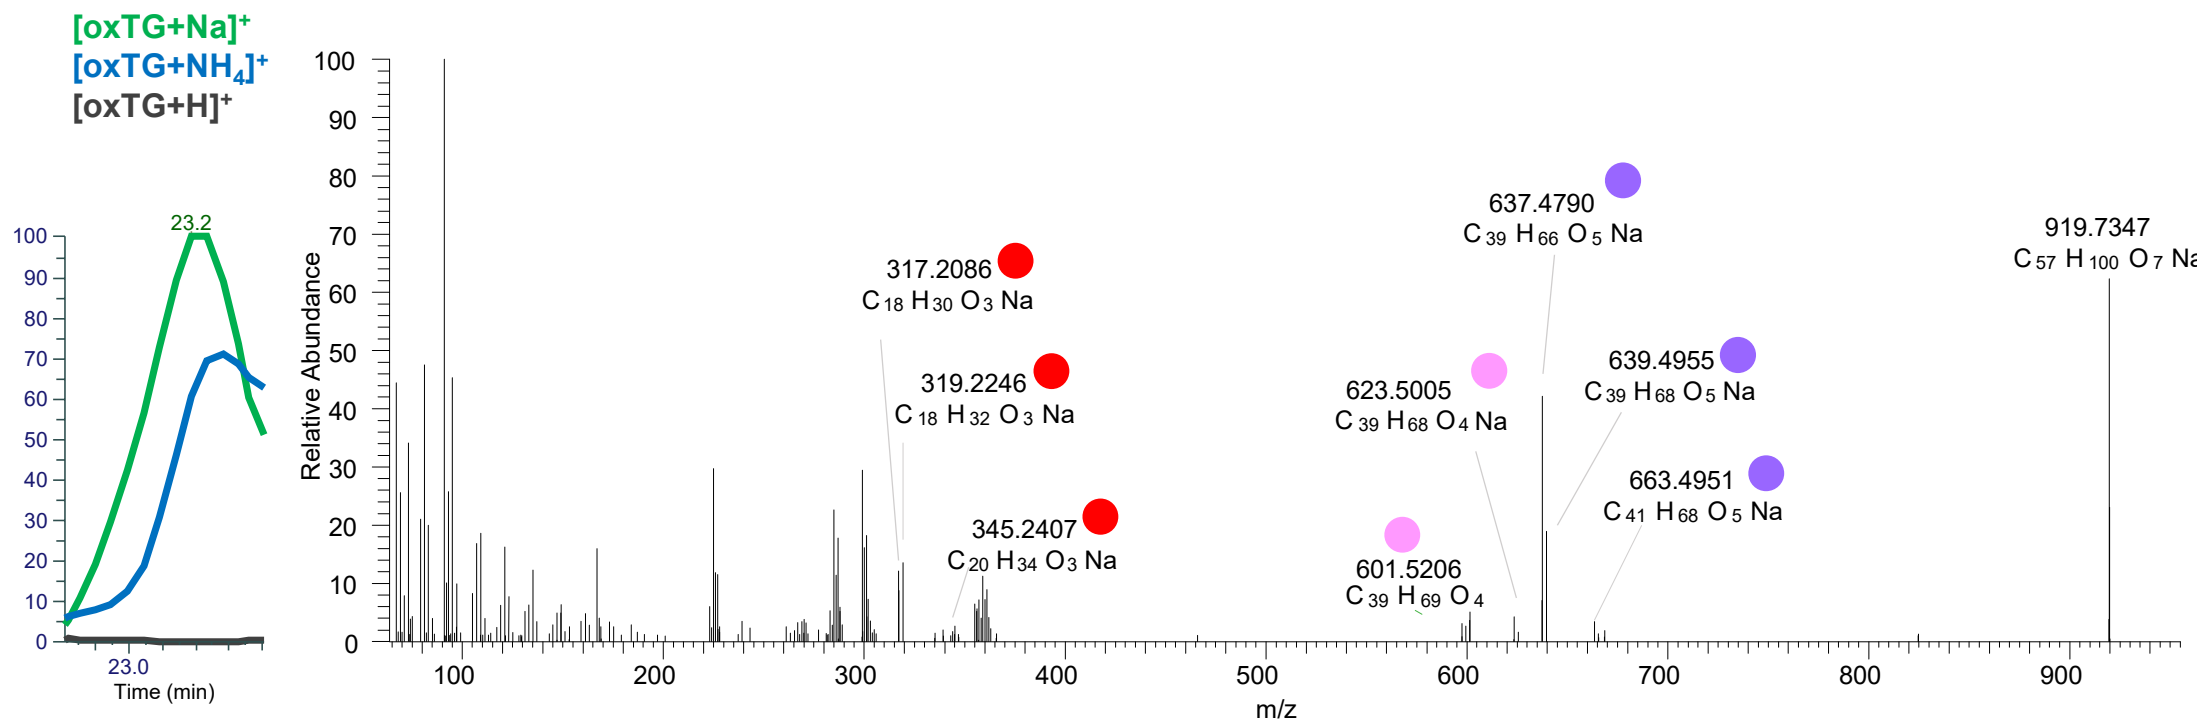

TG(18:1\_18:1\_18:3<OH>)  
 TG(18:1\_18:2\_18:2<O>)  
 TG(16:0\_18:2\_20:3<O>)  
 TG(16:0\_18:1\_20:4<O>)  
 RT 23.5

[oxTG+Na]<sup>+</sup>

XIC 919.7361 NL: 9.68E5

- Fragments containing oxFAs
- Fragments related to water loss
- Fragments not containing oxFAs
- Fragments related to other oxLPPs
- Position-specific fragments
- Fragments related to FA loss
- Fragments related to oxFA loss

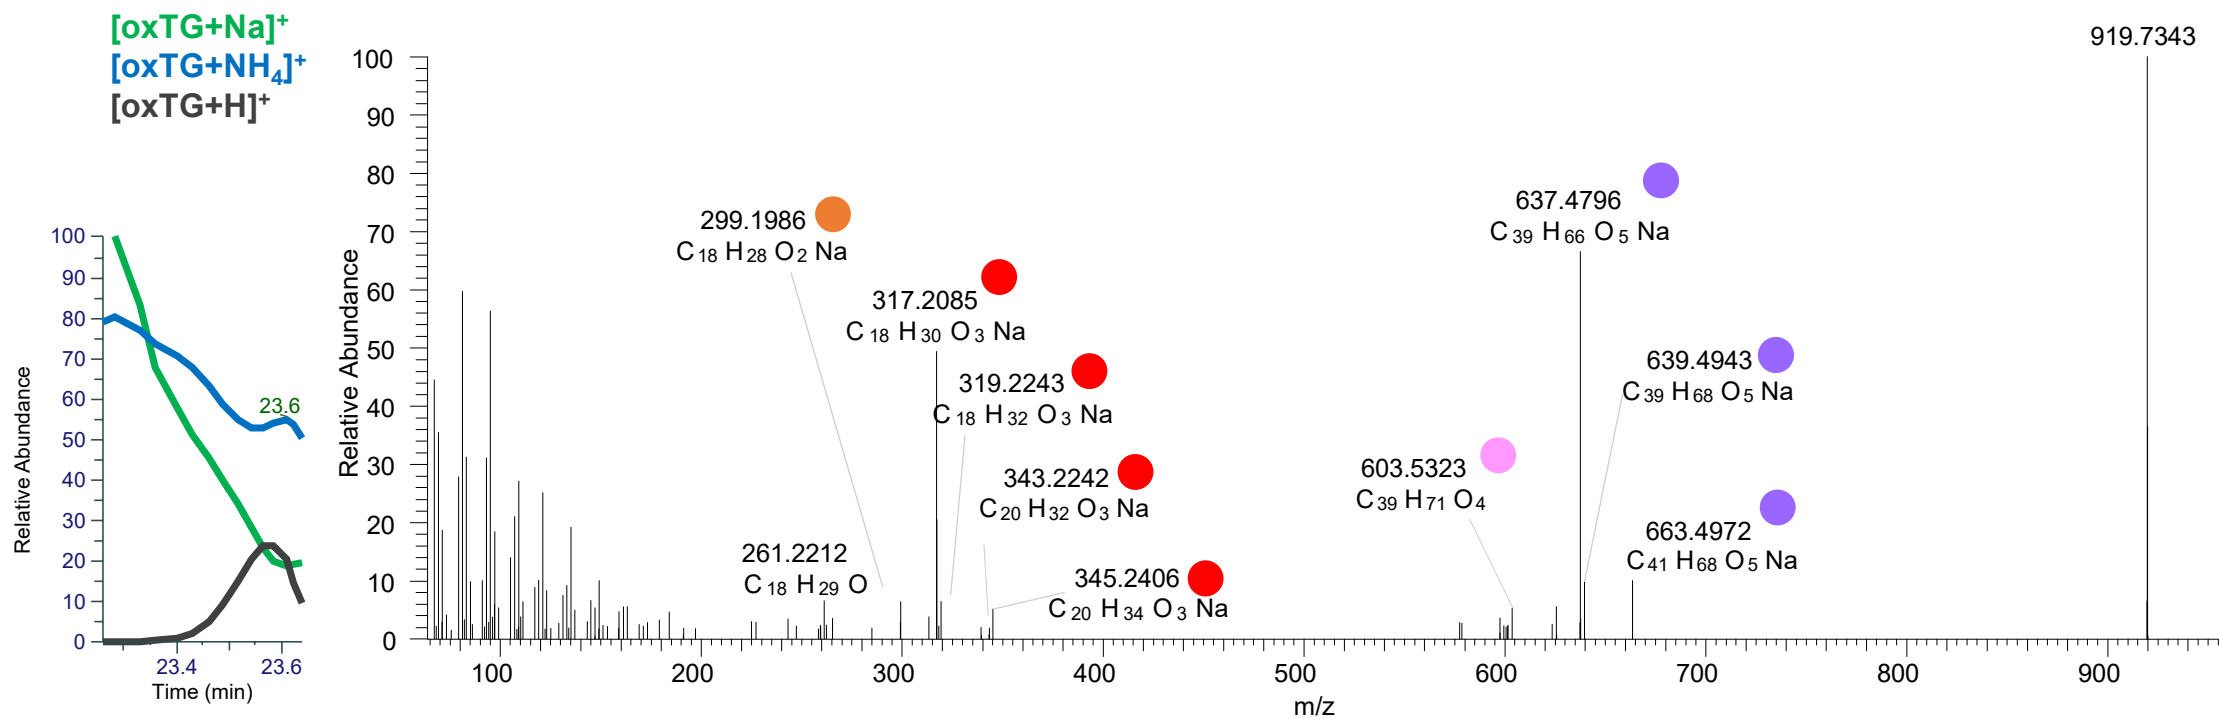



TG(18:1\_18:1\_18:3<OH>)  
 TG(16:0\_18:2\_20:2<oxo>)  
 TG(16:0\_18:1\_20:4<OH>)  
 RT 24.0

[oxTG+Na]<sup>+</sup>

XIC 919.7361 NL: 6.47E5

- Fragments containing oxFAs
- Fragments related to water loss
- Fragments not containing oxFAs
- Fragments related to other oxLPPs
- Position-specific fragments
- Fragments related to FA loss
- Fragments related to oxFA loss

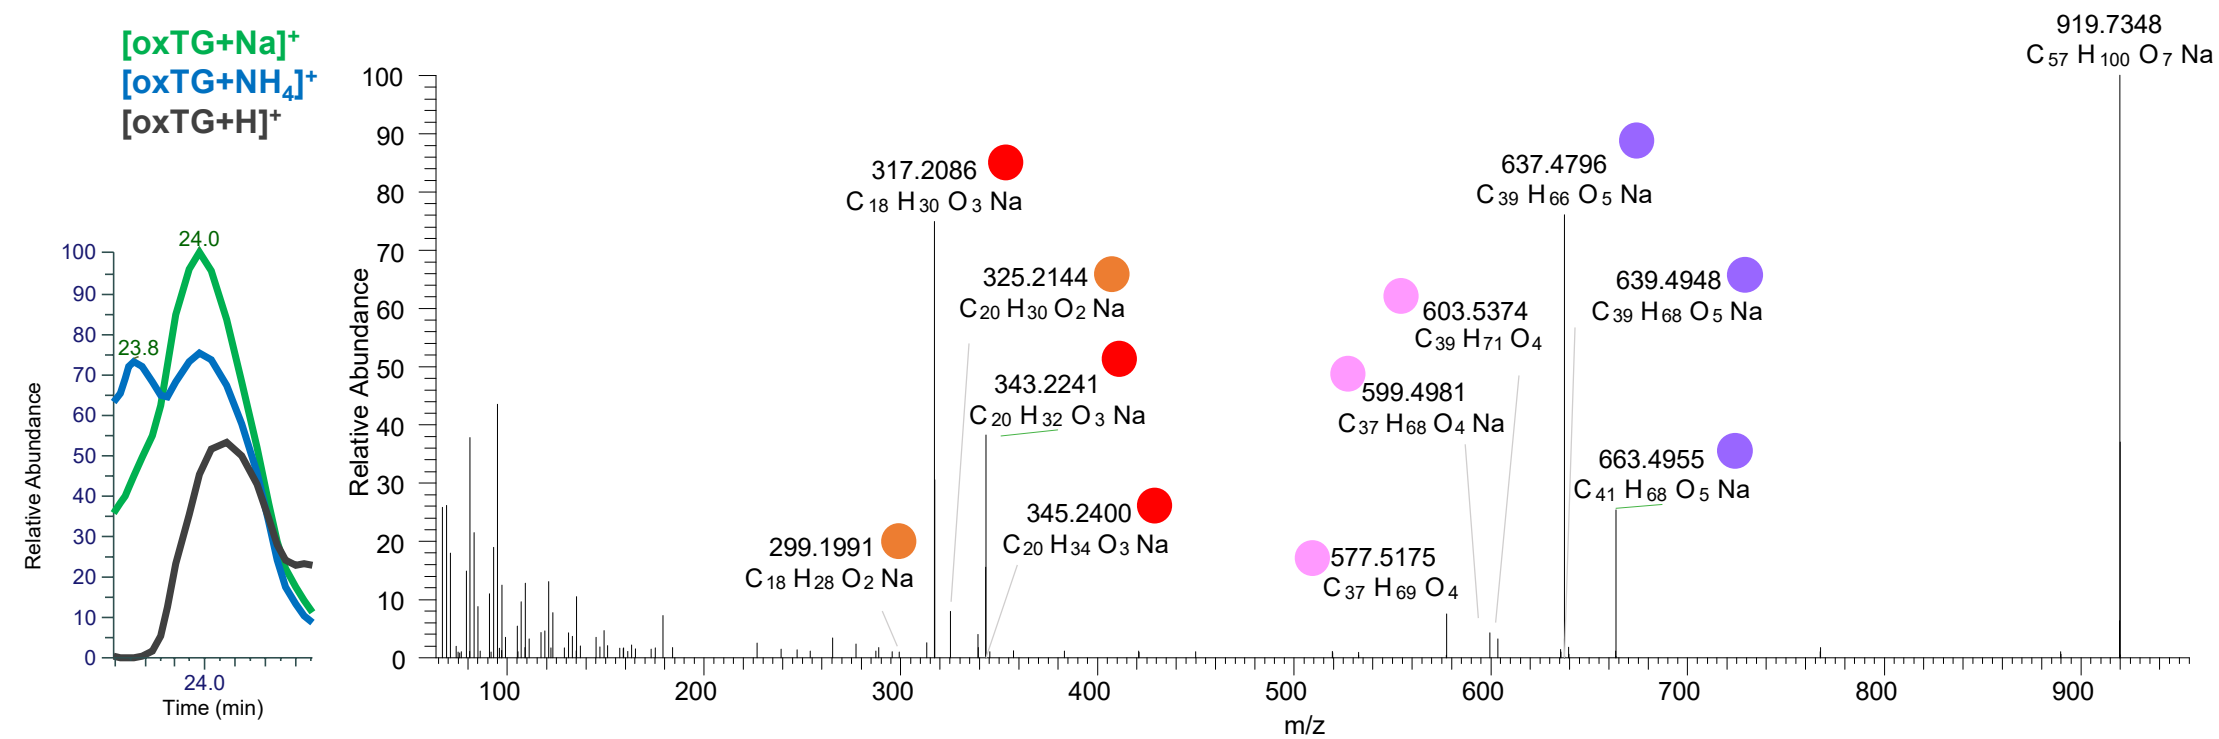

TG(18:1\_18:1\_18:2<oxo>)

RT 25.3

TG(18:1\_18:1\_18:2<ep>)

RT 25.4

[oxTG+Na]<sup>+</sup>

XIC 919.7361 NL: 2.20E5

- Fragments containing oxFAs
- Fragments related to water loss
- Fragments not containing oxFAs
- Fragments related to other oxLPPs
- Position-specific fragments
- Fragments related to FA loss
- Fragments related to oxFA loss

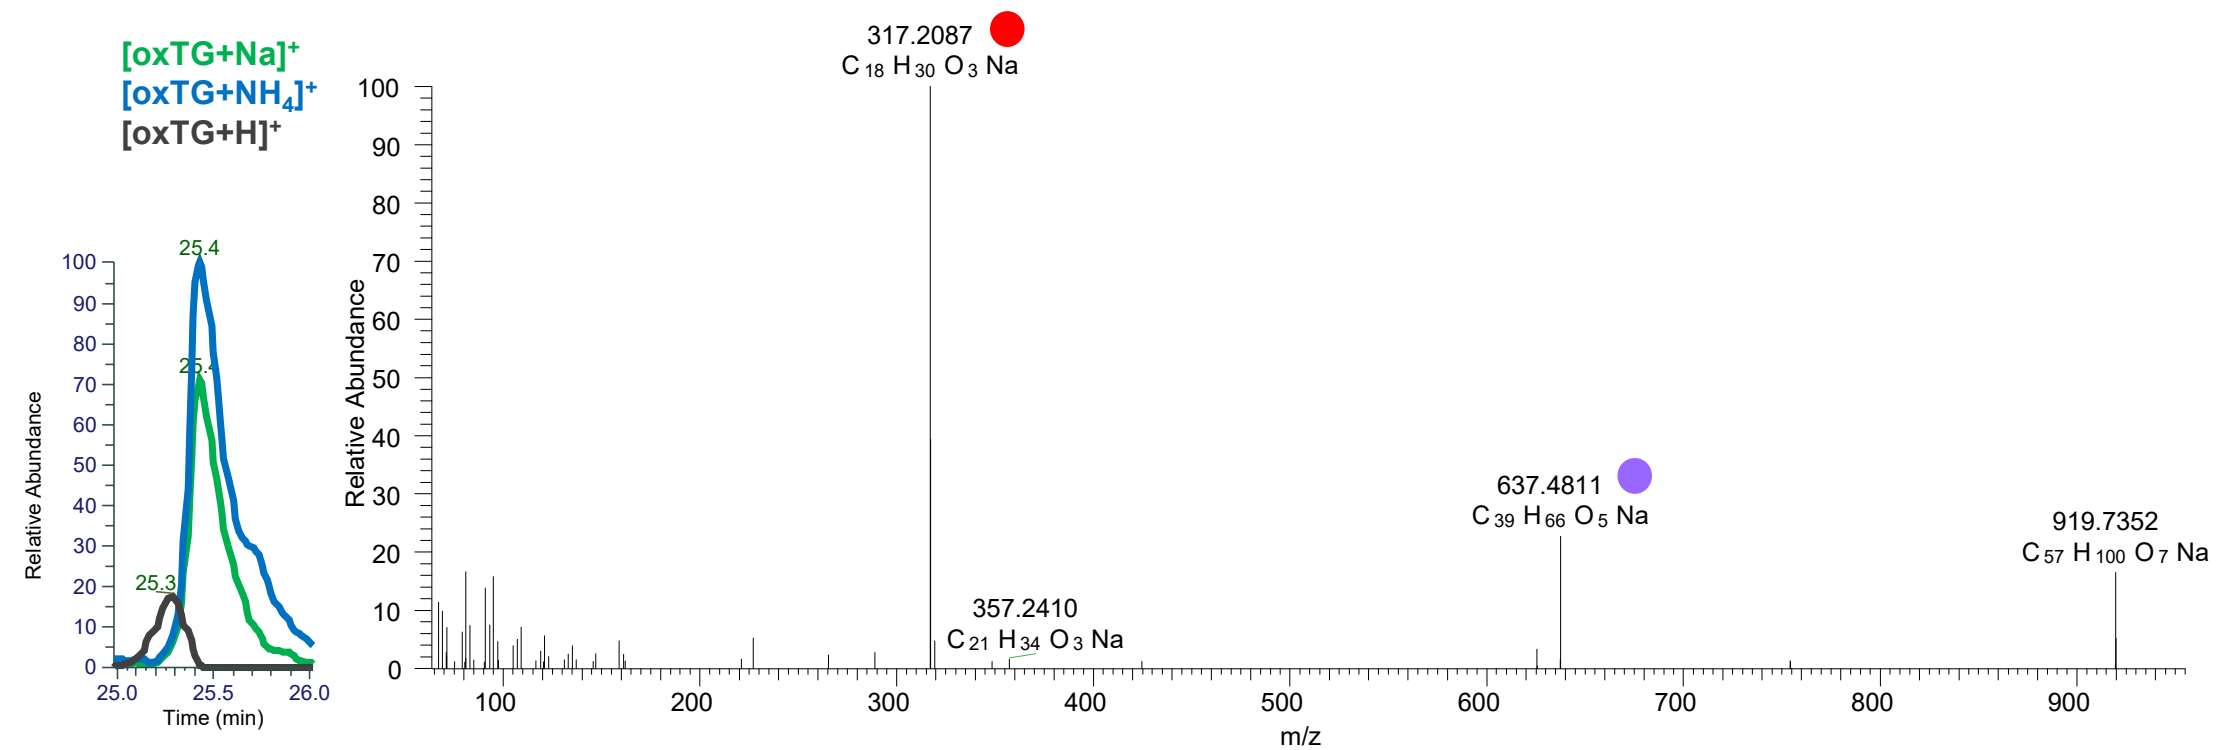

TG(18:0\_18:2\_18:2<OH>)  
TG(18:0\_18:1\_18:2<ep>)  
RT 23.4

[oxTG+Na]<sup>+</sup>

XIC 921.7517 NL: 3.21E5

- Fragments containing oxFAs
- Fragments related to water loss
- Fragments not containing oxFAs
- Fragments related to other oxLPPs
- Position-specific fragments
- Fragments related to FA loss
- Fragments related to oxFA loss

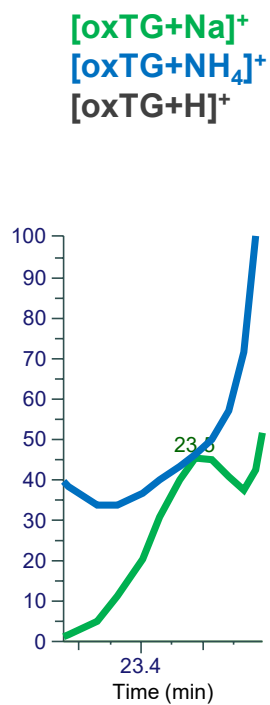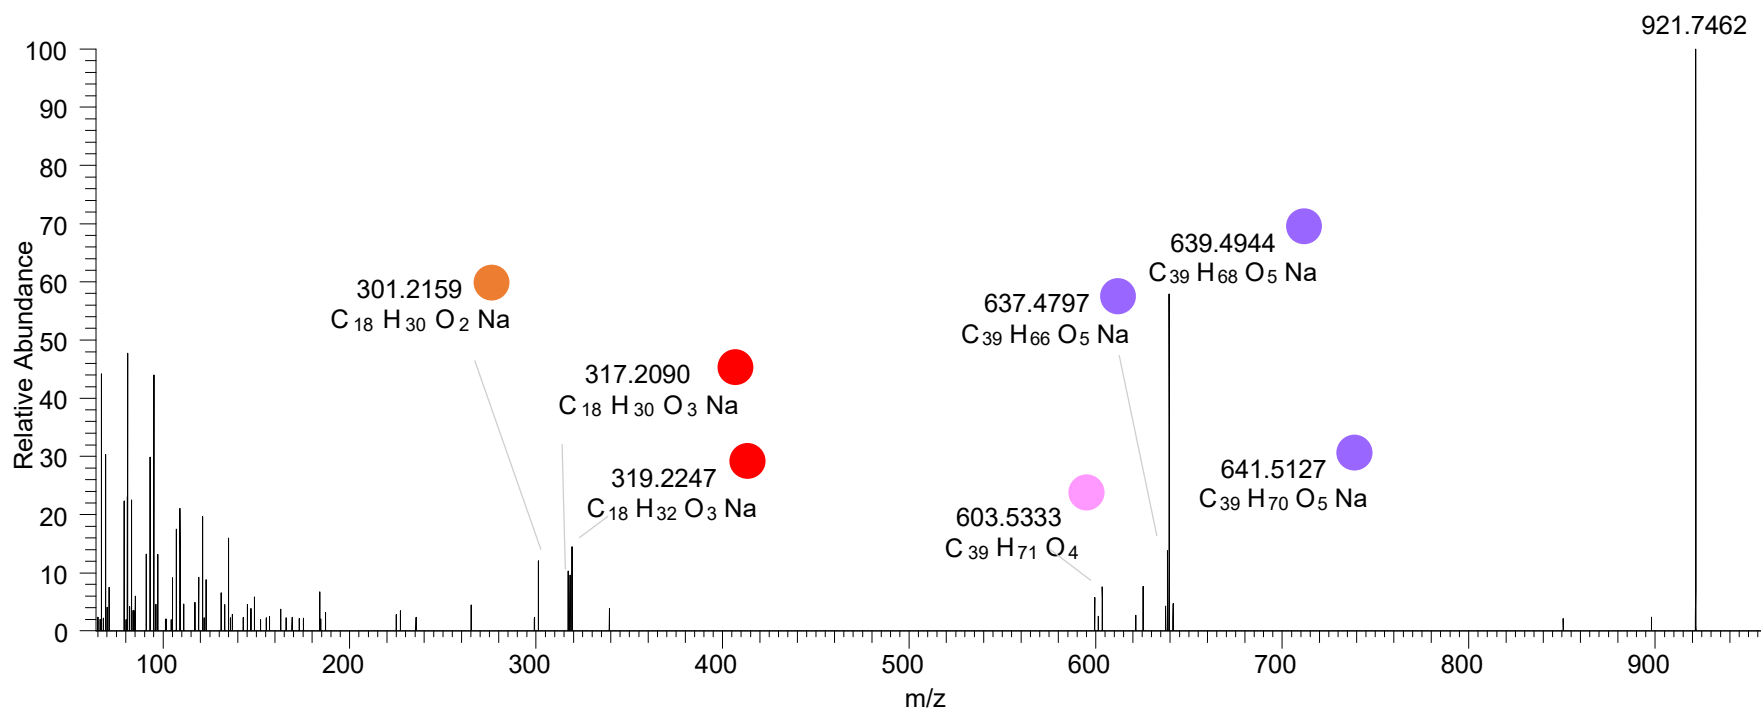

# TG(18:1\_18:1\_18:2<OH>)

RT 23.7

[oxTG+Na]<sup>+</sup>

XIC 921.7517 NL: 3.21E5

- Fragments containing oxFAs
- Fragments related to water loss
- Fragments not containing oxFAs
- Fragments related to other oxLPPs
- Position-specific fragments
- Fragments related to FA loss
- Fragments related to oxFA loss

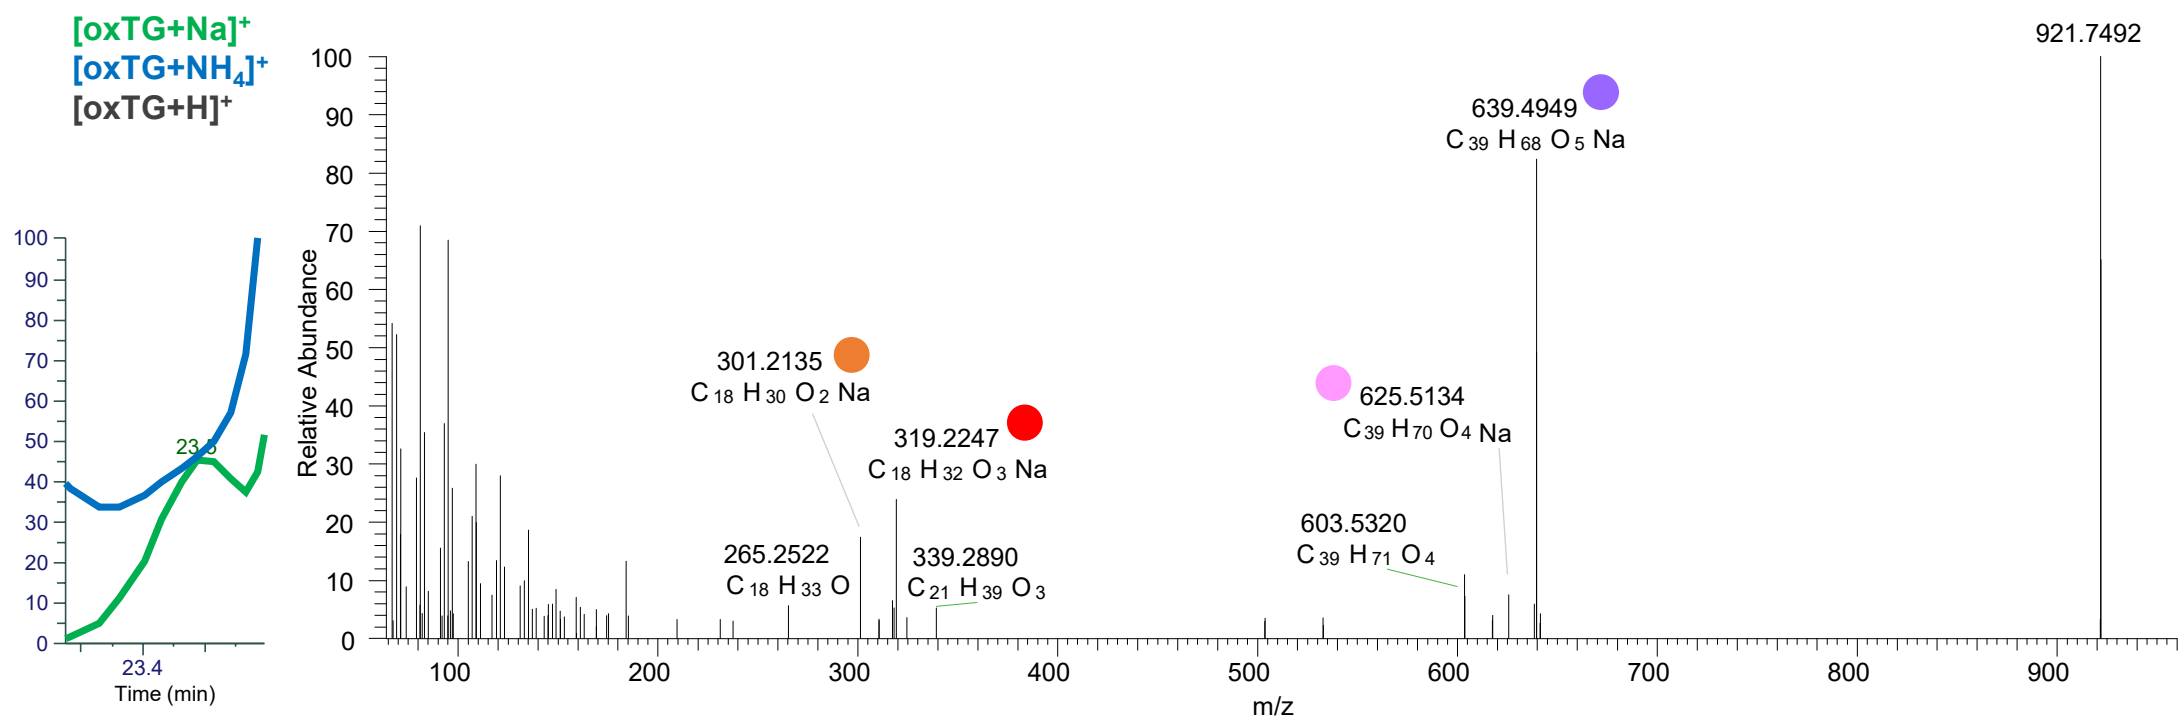

TG(18:1\_18:1\_18:2<OH>)  
TG(16:0\_18:1\_20:3<OH>)  
23.9

[oxTG+Na]<sup>+</sup>

XIC 921.7517 NL: 1.80E6

- Fragments containing oxFAs
- Fragments related to water loss
- Fragments not containing oxFAs
- Fragments related to other oxLPPs
- Position-specific fragments
- Fragments related to FA loss
- Fragments related to oxFA loss

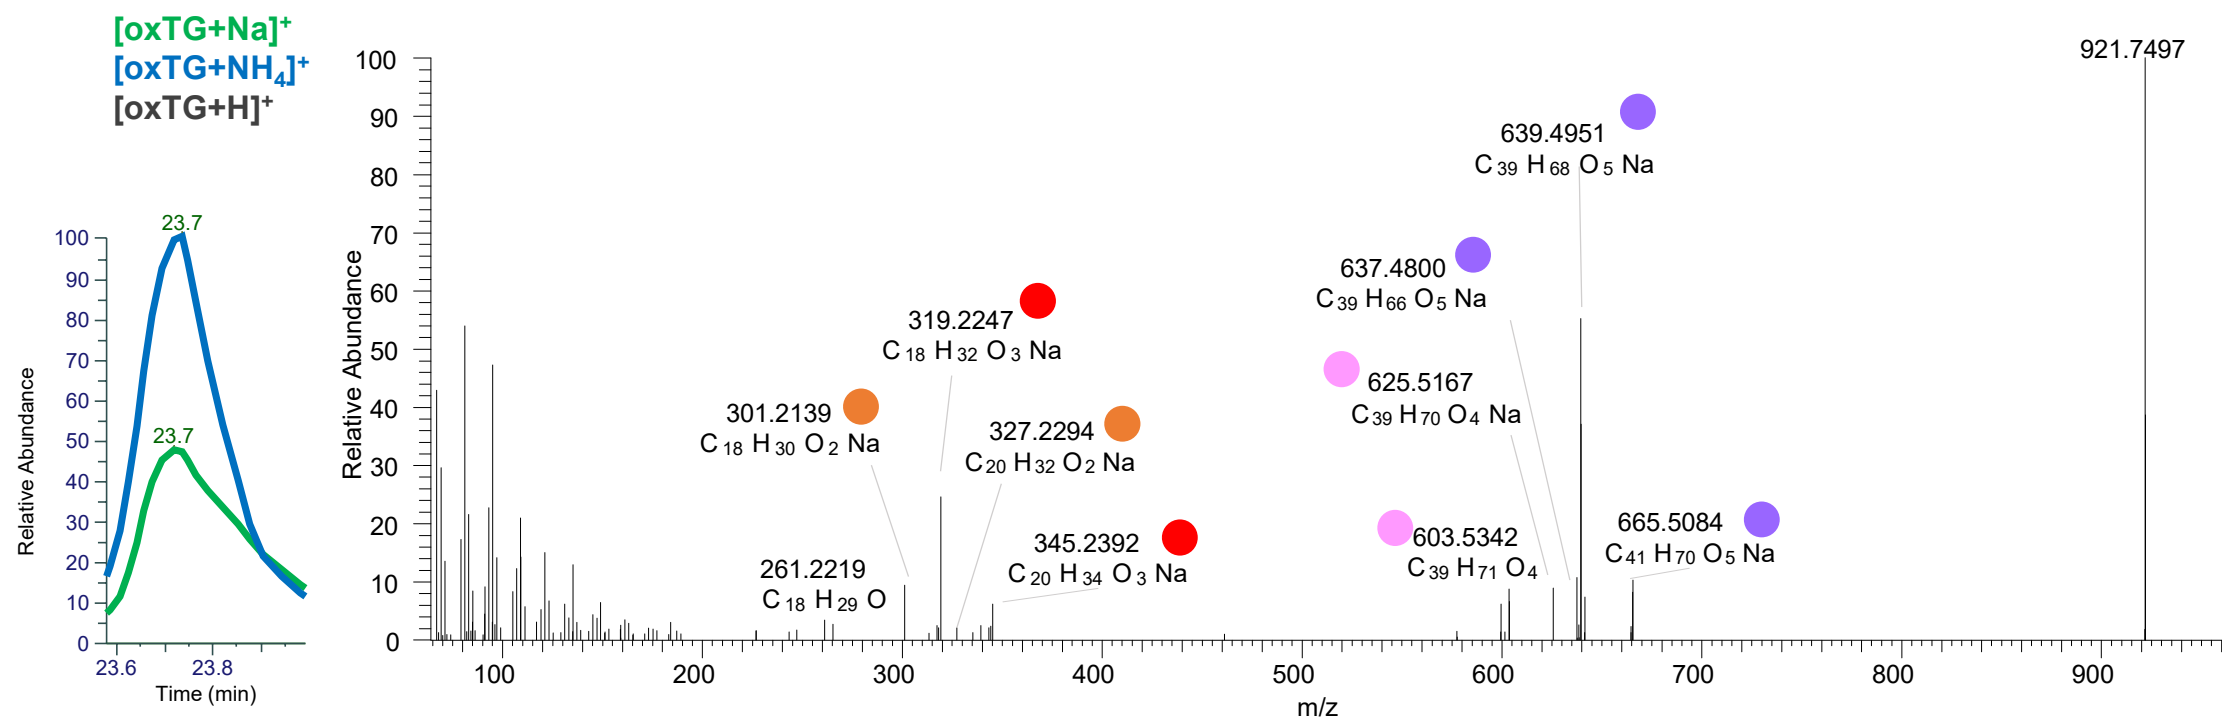

# TG(18:0\_18:1\_18:3<O>)

RT 24.9

[oxTG+Na]<sup>+</sup>

XIC 921.7517 NL: 1.01E5

- Fragments containing oxFAs
- Fragments related to water loss
- Fragments not containing oxFAs
- Fragments related to other oxLPPs
- Position-specific fragments
- Fragments related to FA loss
- Fragments related to oxFA loss

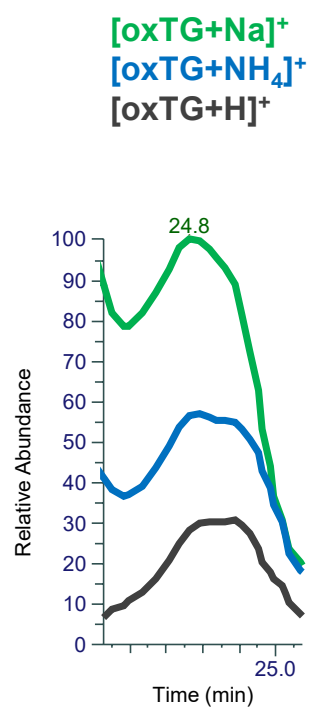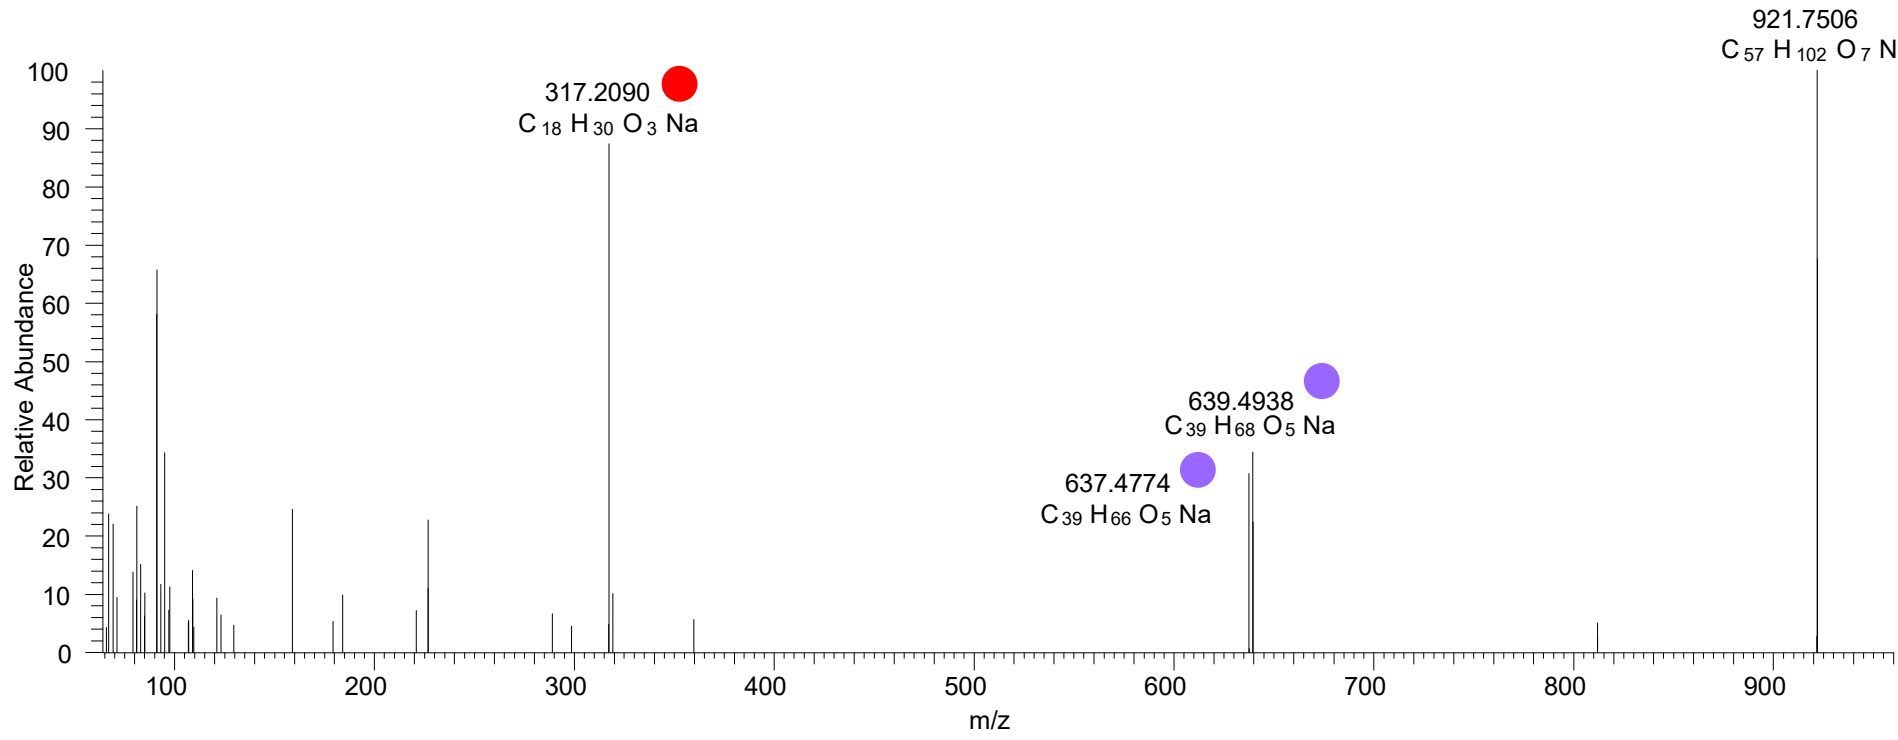

# TG(16:0\_18:1\_18:3<3O>)

## RT 22.0

[oxTG+Na]<sup>+</sup>

XIC 925.7103 NL: 3.65E4

- Fragments containing oxFAs
- Fragments related to water loss
- Fragments not containing oxFAs
- Fragments related to other oxLPPs
- Position-specific fragments
- Fragments related to FA loss
- Fragments related to oxFA loss

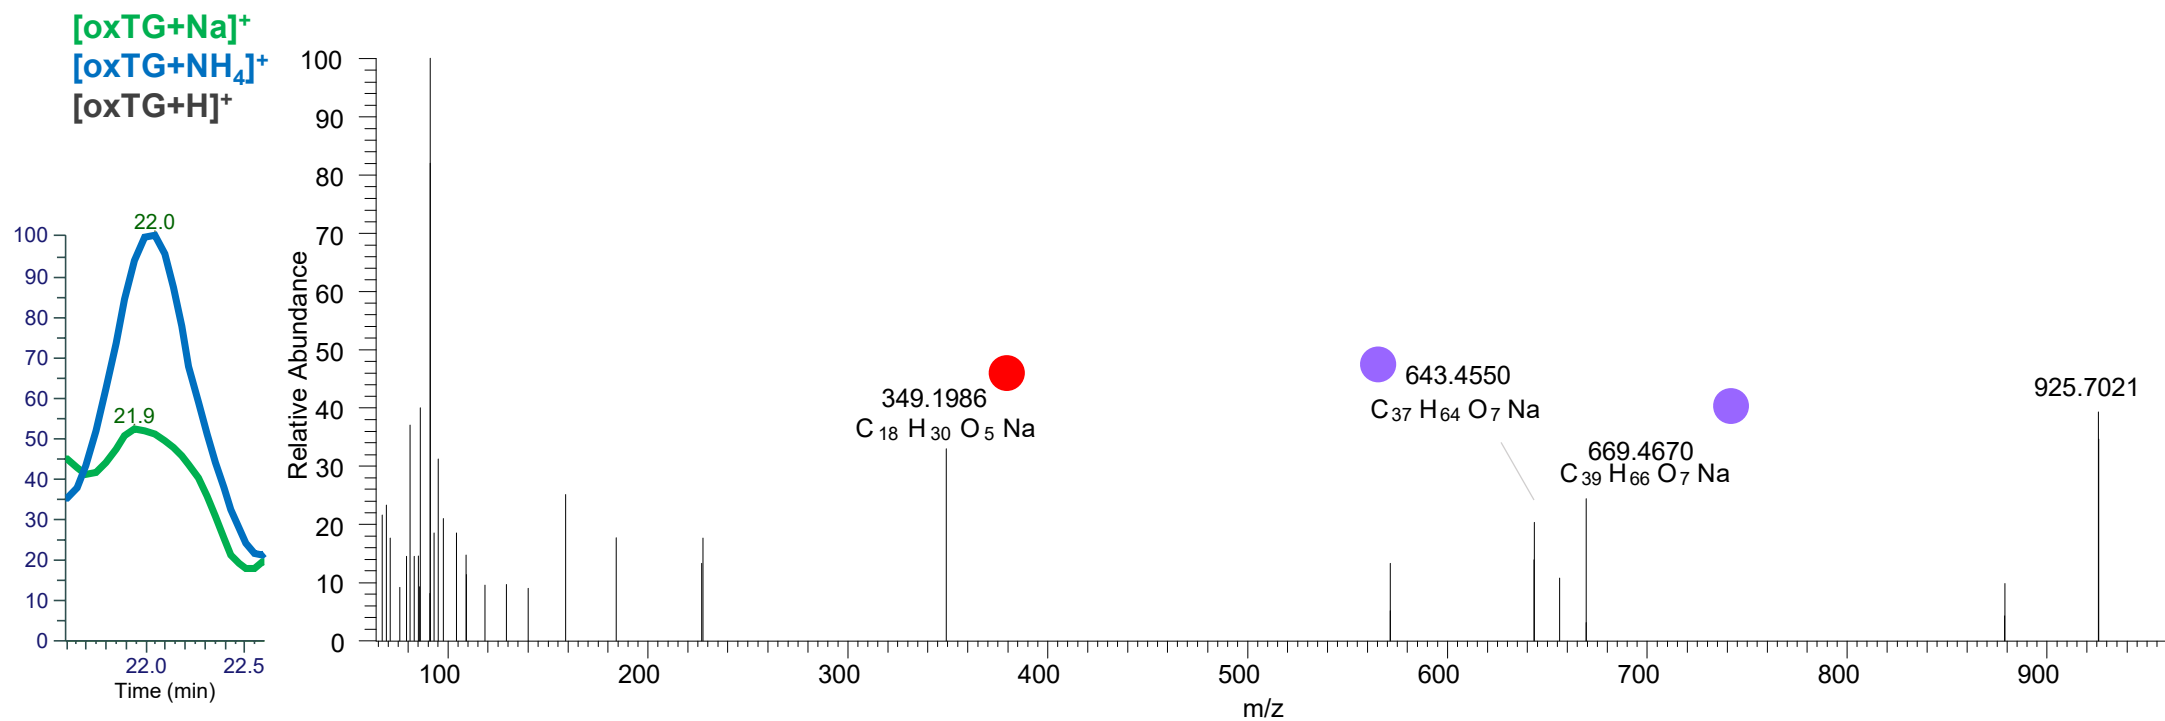

TG(16:1\_18:1\_20:4<2O>)  
 TG(16:0\_18:2\_20:4<2O>)  
 TG(18:1\_18:2\_18:3<2O>)  
 RT 21.1

[oxTG+Na]<sup>+</sup>

XIC 933.7154 NL: 9.25E4

- Fragments containing oxFAs
- Fragments related to water loss
- Fragments not containing oxFAs
- Fragments related to other oxLPPs
- Position-specific fragments
- Fragments related to FA loss
- Fragments related to oxFA loss

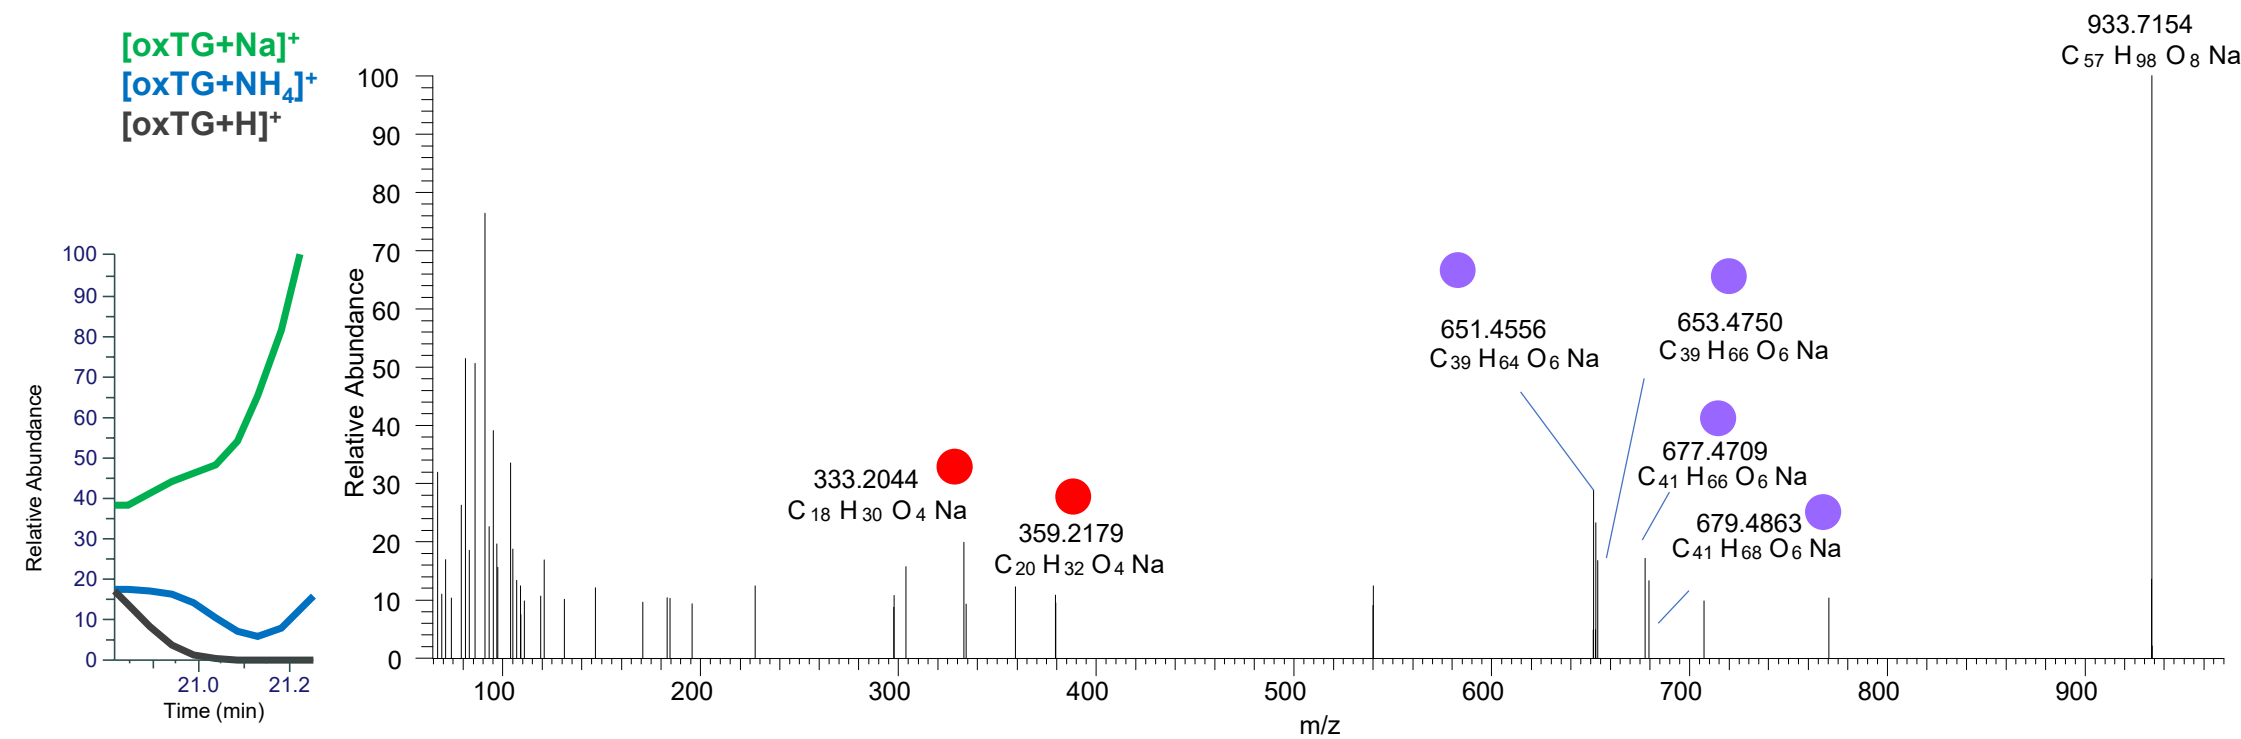



TG(16:0\_18:2\_20:4<O,OH>)  
 TG(18:1\_18:1\_18:4<2O>)  
 TG(16:0\_16:1\_22:5<2O>)  
 RT 21.5

[oxTG+Na]<sup>+</sup>

XIC 933.7154 NL: 1.40E5

- Fragments containing oxFAs
- Fragments related to water loss
- Fragments not containing oxFAs
- Fragments related to other oxLPPs
- Position-specific fragments
- Fragments related to FA loss
- Fragments related to oxFA loss

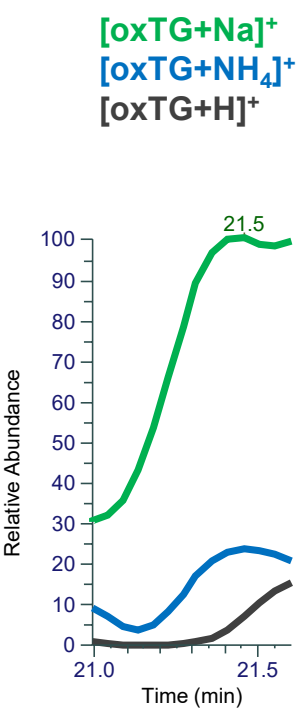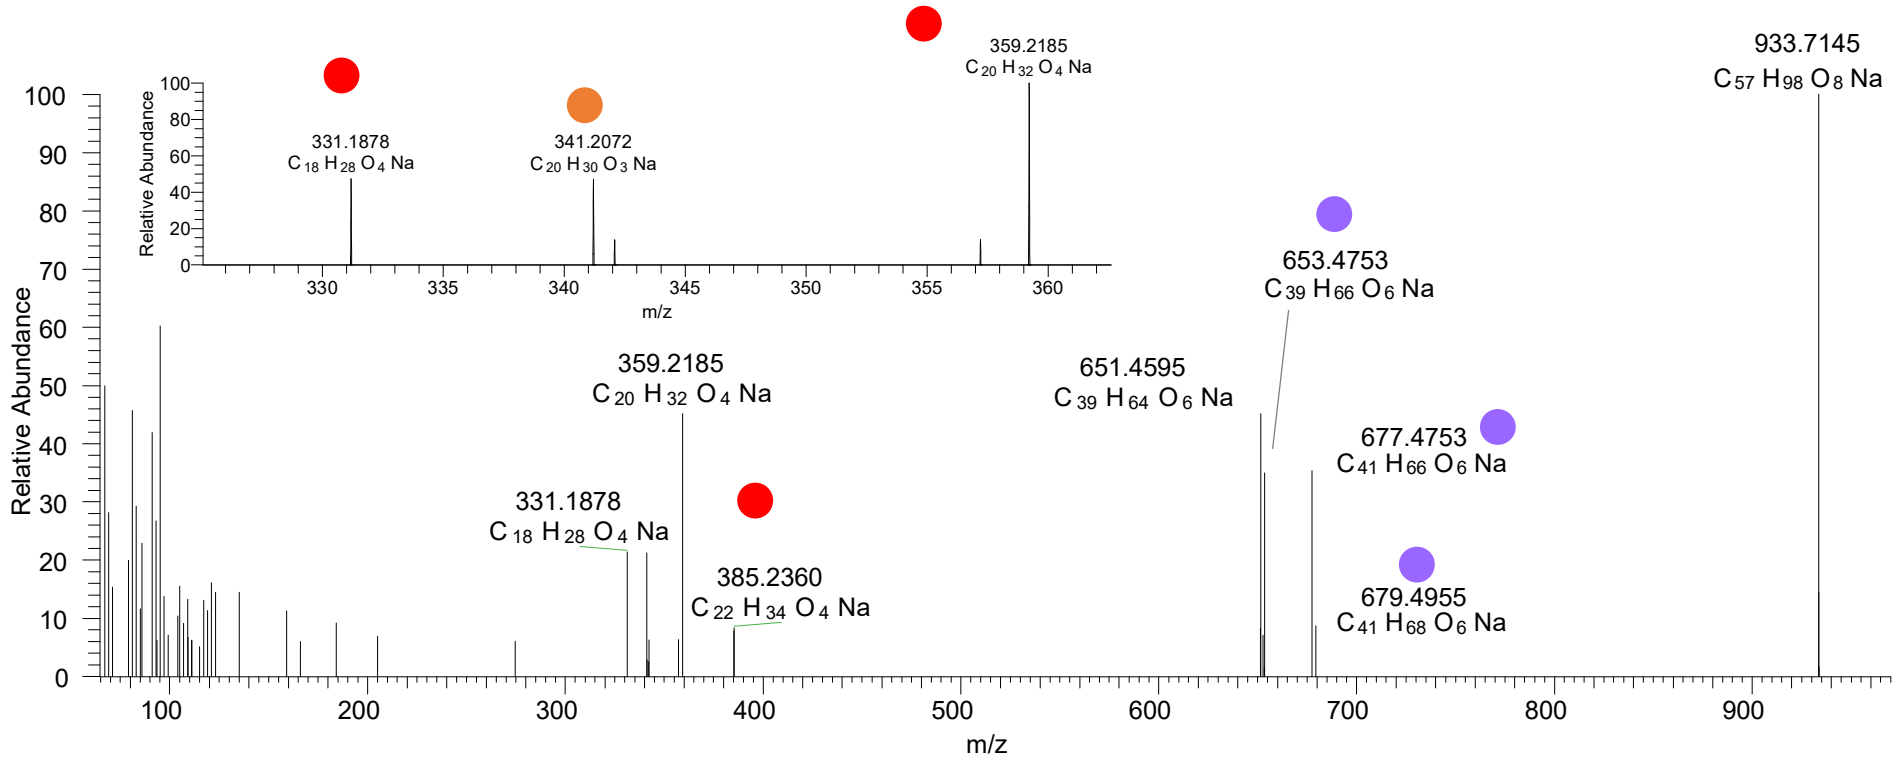

TG(16:0\_18:1\_20:5<OH,O>)  
 TG(16:0\_18:2\_20:4<OH,O>)  
 TG(18:1\_18:1\_18:4<2O>) - ISF  
 RT 21.8

[oxTG+Na]<sup>+</sup>

XIC 933.7154 NL: 1.57E5

- Fragments containing oxFAs
- Fragments related to water loss
- Fragments not containing oxFAs
- Fragments related to other oxLPPs
- Position-specific fragments
- Fragments related to FA loss
- Fragments related to oxFA loss

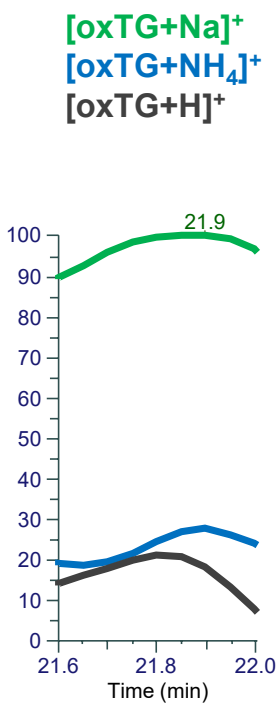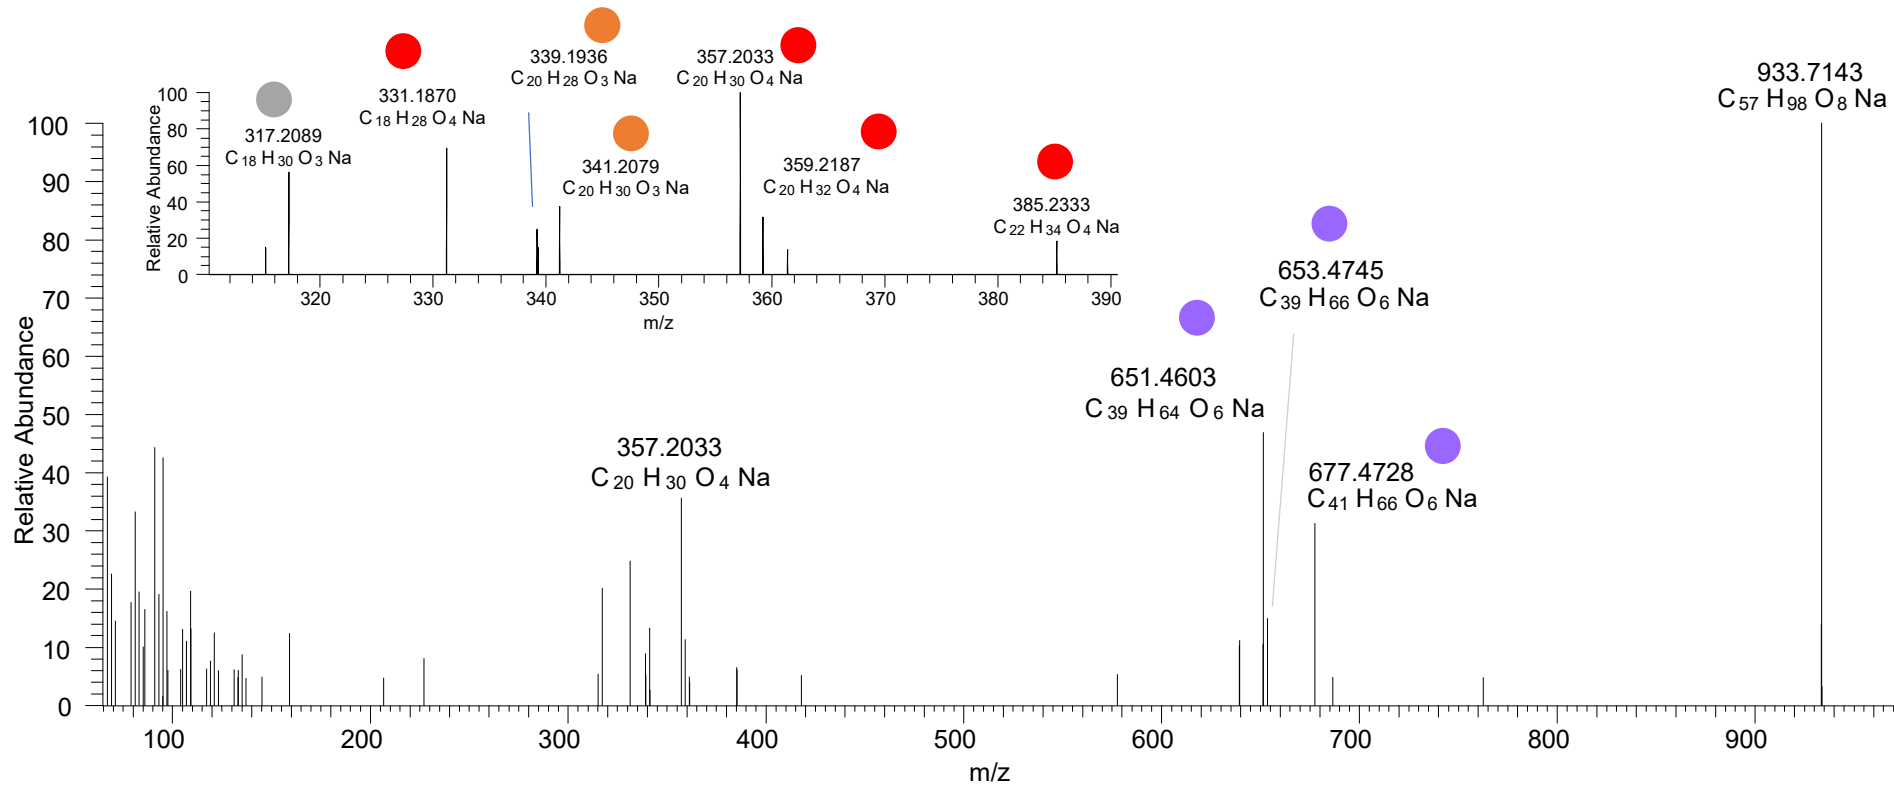

TG(18:1\_18:2\_18:3<OOH>)  
 TG(16:0\_18:2\_20:4<2O>)  
 TG(16:0\_18:1\_20:5<OOH>)  
 RT 22.3

[oxTG+Na]<sup>+</sup>

XIC 933.7154 NL: 2.25E5

- Fragments containing oxFAs
- Fragments related to water loss
- Fragments not containing oxFAs
- Fragments related to other oxLPPs
- Position-specific fragments
- Fragments related to FA loss
- Fragments related to oxFA loss

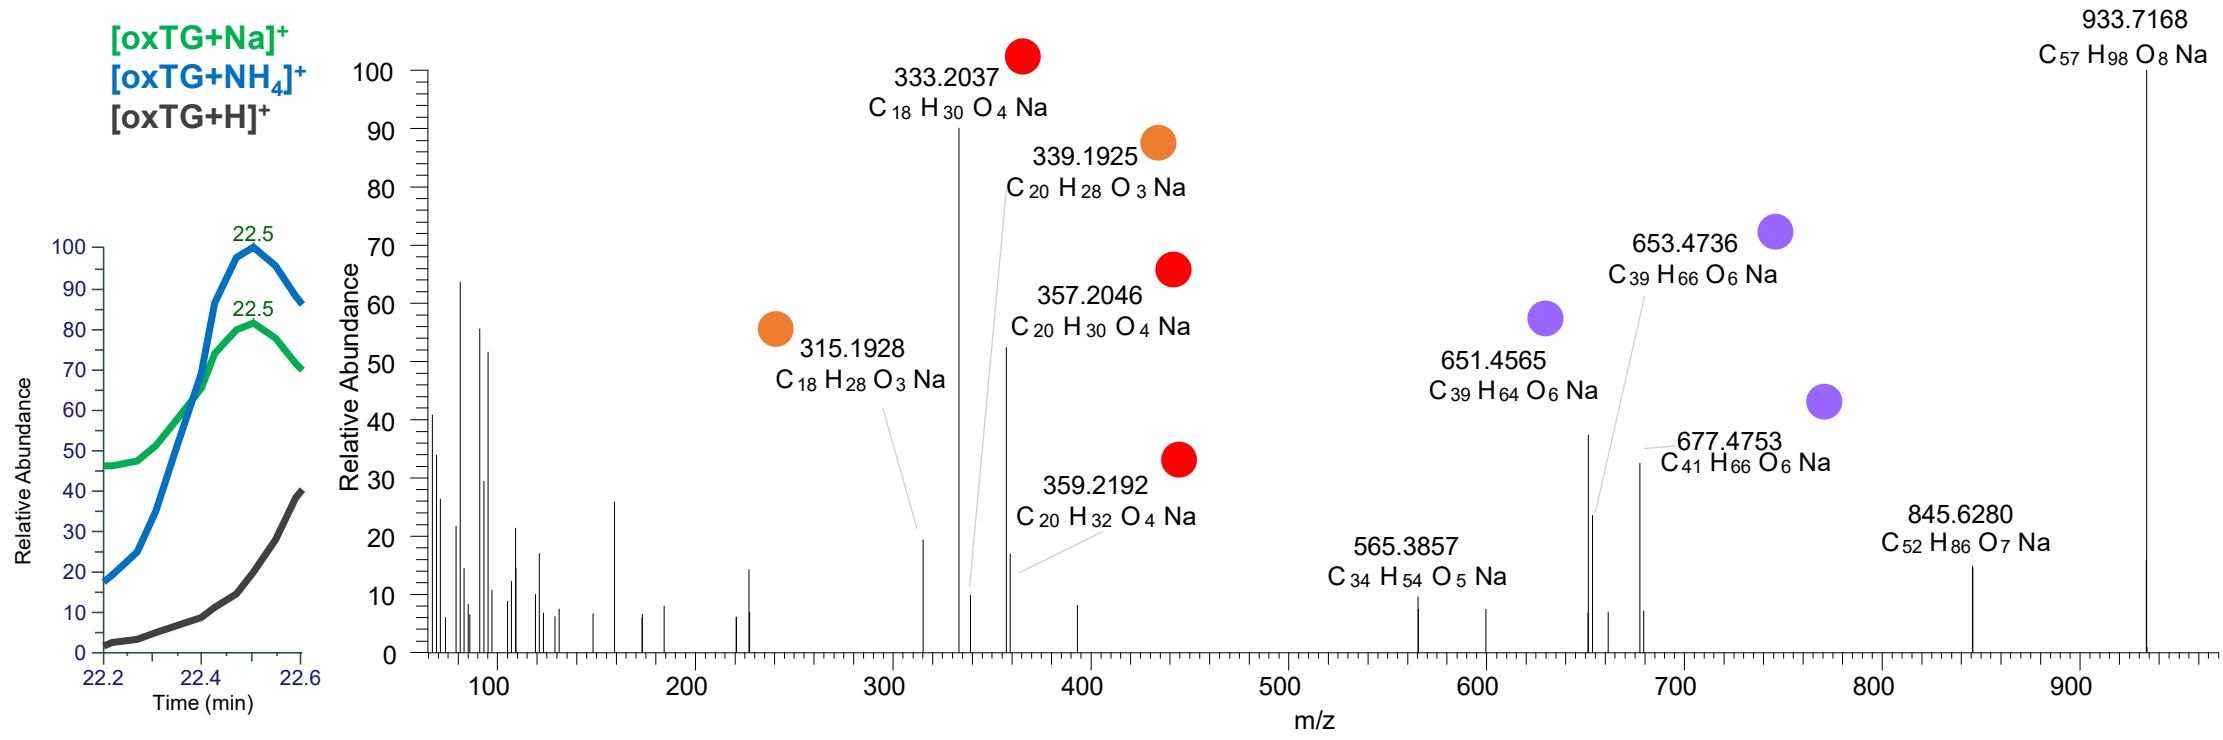

TG(18:1\_18:1\_18:4<2O>)  
 TG(18:1\_18:2\_18:3<2O>)  
 TG(18:2\_18:2\_18:2<2O>)  
 TG(16:0\_18:1\_20:5<2O>)  
 RT 22.5-22.7

[oxTG+Na]<sup>+</sup>

XIC 933.7154 NL: 2.25E5

- Fragments containing oxFAs
- Fragments related to water loss
- Fragments not containing oxFAs
- Fragments related to other oxLPPs
- Position-specific fragments
- Fragments related to FA loss
- Fragments related to oxFA loss

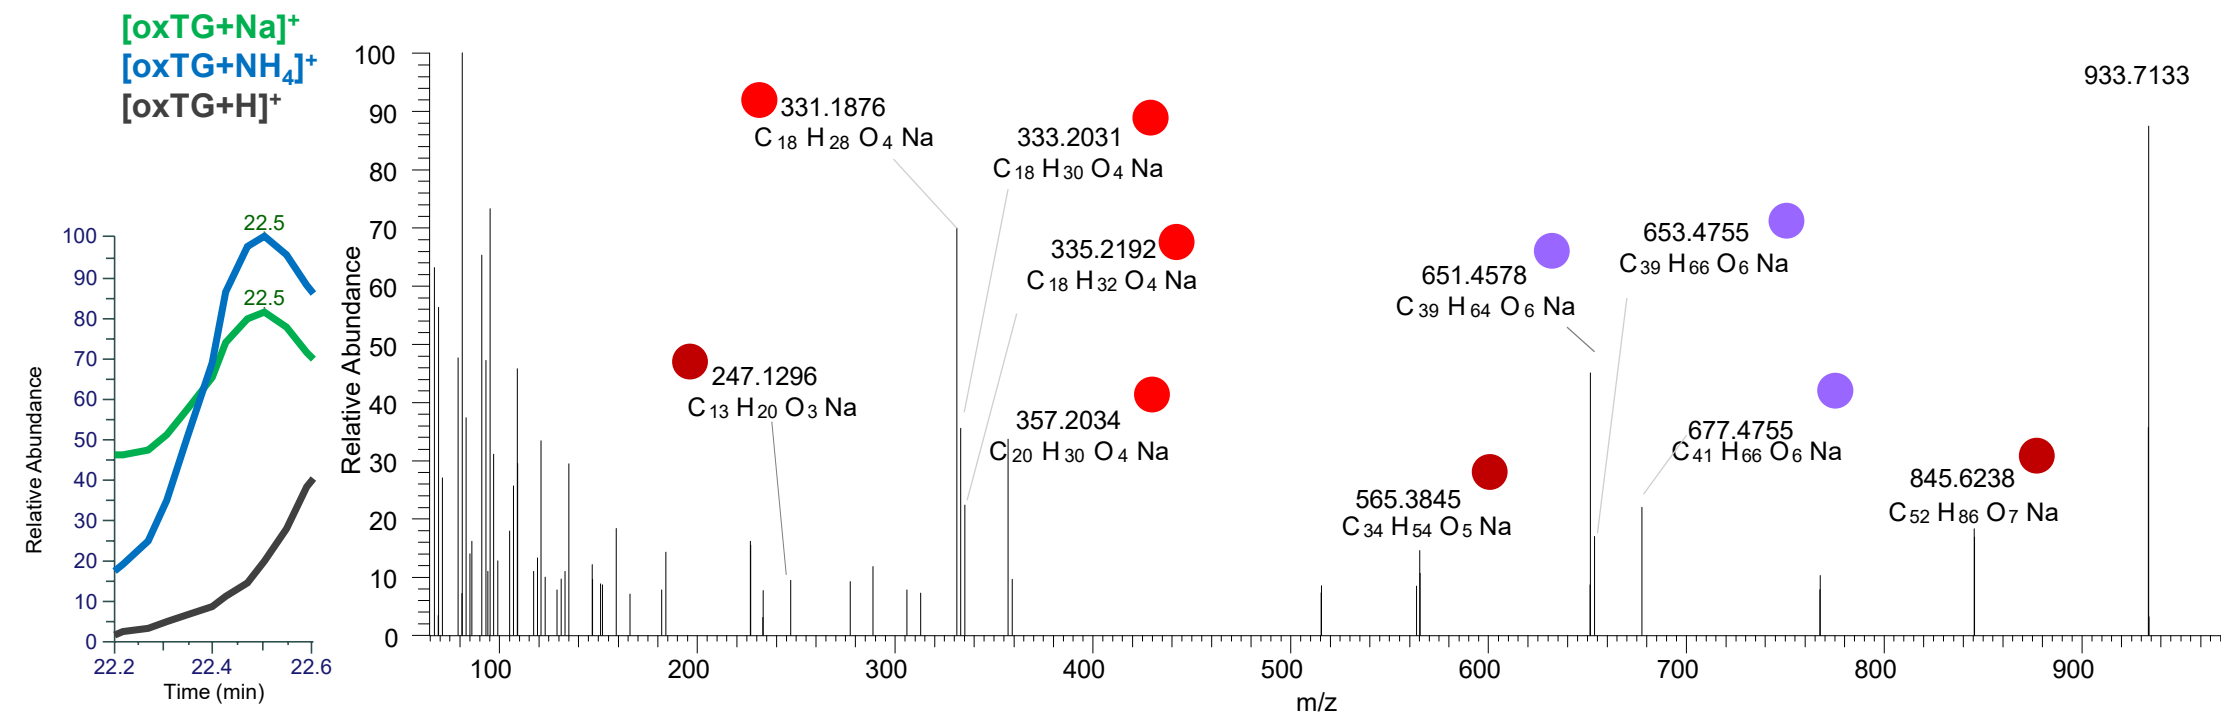

# TG(18:1\_18:2<OH>\_18:2<OH>) RT 20.2

[oxTG+Na]<sup>+</sup>

XIC 935.7310 NL: 3.13E5

- Fragments containing oxFAs
- Fragments related to water loss
- Fragments not containing oxFAs
- Fragments related to other oxLPPs
- Position-specific fragments
- Fragments related to FA loss
- Fragments related to oxFA loss

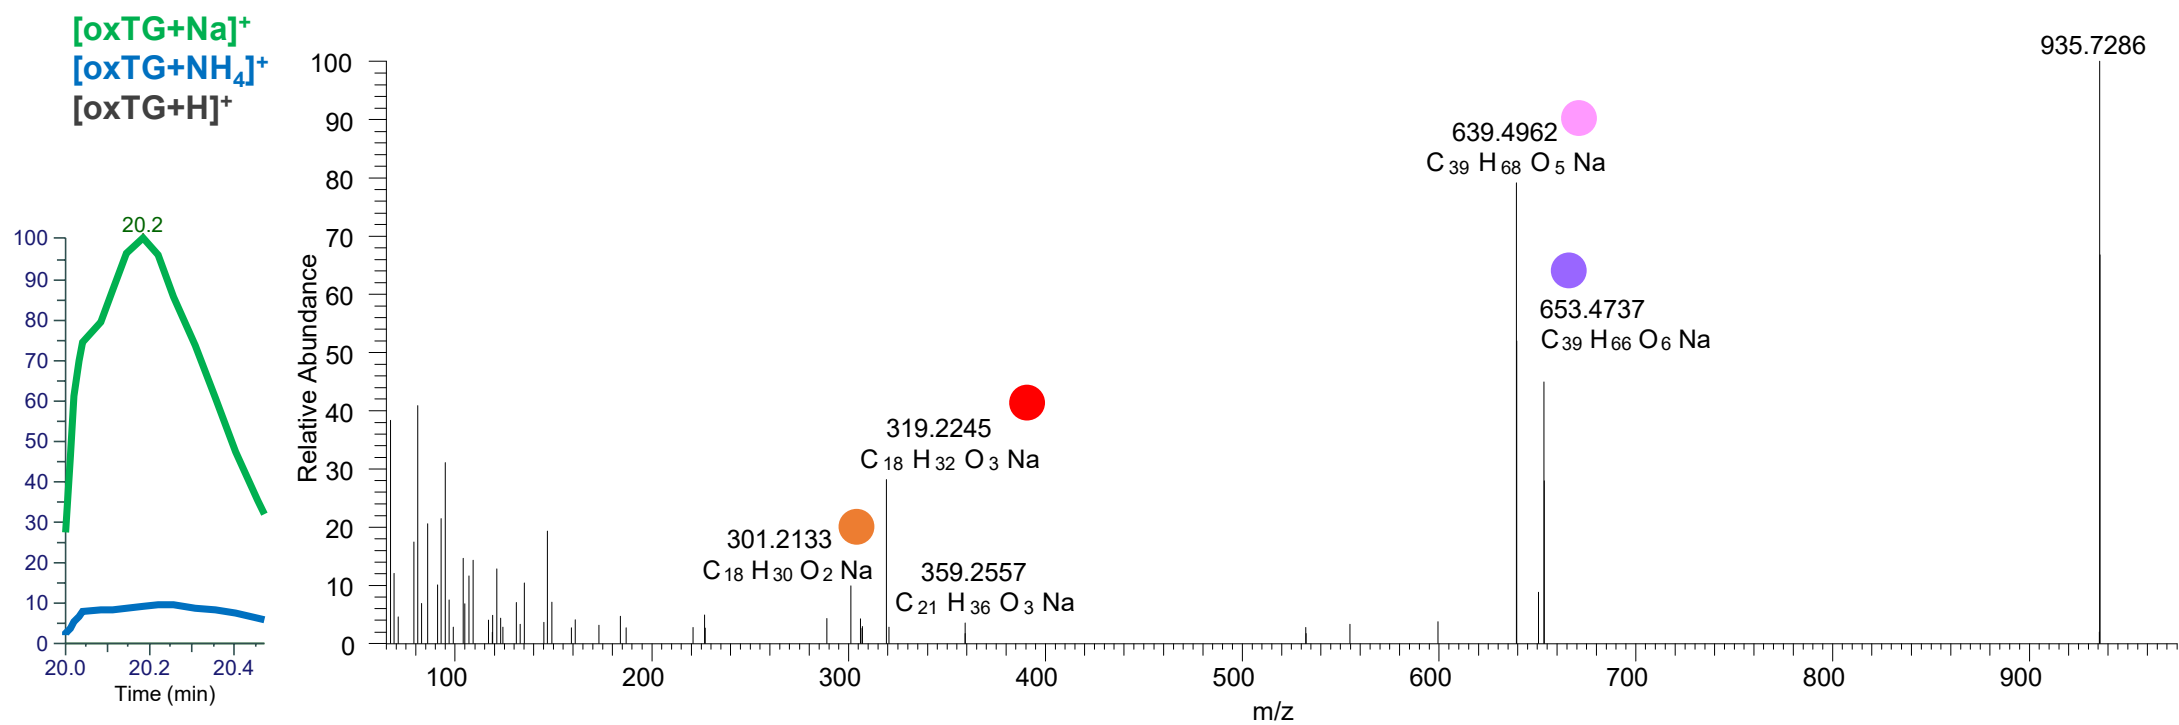

TG(18:1\_18:2\_18:2<2O>)  
TG(18:1\_18:1\_18:3<OH,O>)  
RT 22.1

[oxTG+Na]<sup>+</sup>

XIC 935.7310 NL: 2.00E5

- Fragments containing oxFAs
- Fragments related to water loss
- Fragments not containing oxFAs
- Fragments related to other oxLPPs
- Position-specific fragments
- Fragments related to FA loss
- Fragments related to oxFA loss

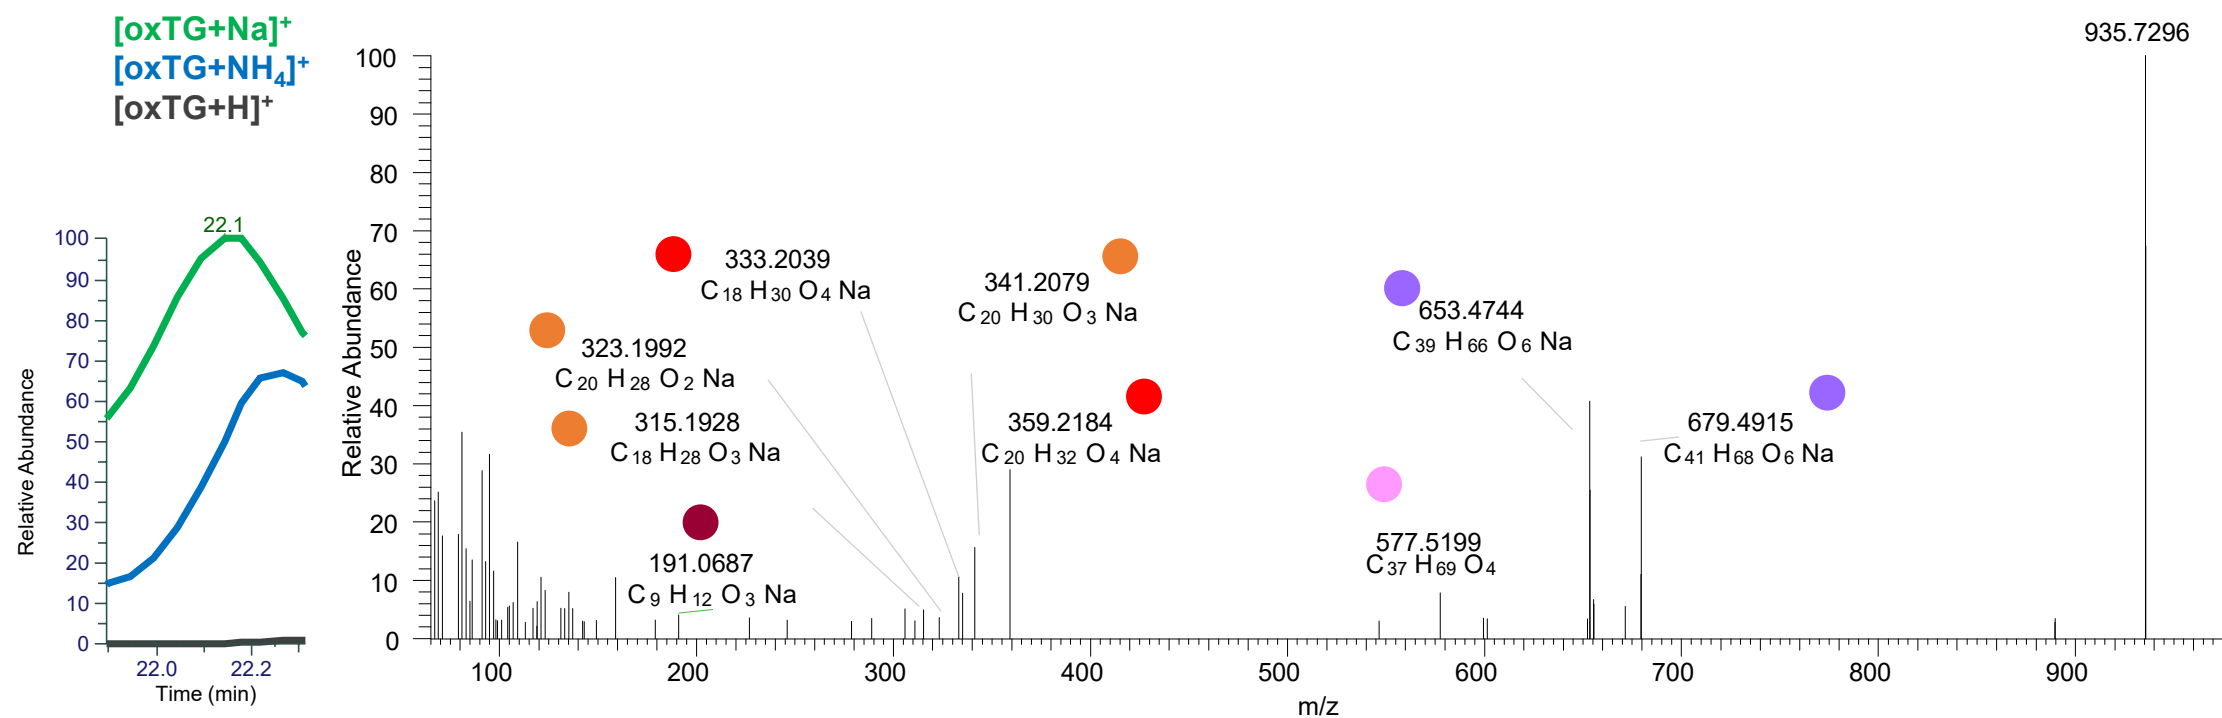

TG(18:1\_18:1\_18:3<OH,O>)  
TG(16:0\_18:1\_20:4<OH,O>)  
RT 22.8

[oxTG+Na]<sup>+</sup>

XIC 935.7310 NL: 8.64E5

- Fragments containing oxFAs
- Fragments related to water loss
- Fragments not containing oxFAs
- Fragments related to other oxLPPs
- Position-specific fragments
- Fragments related to FA loss
- Fragments related to oxFA loss

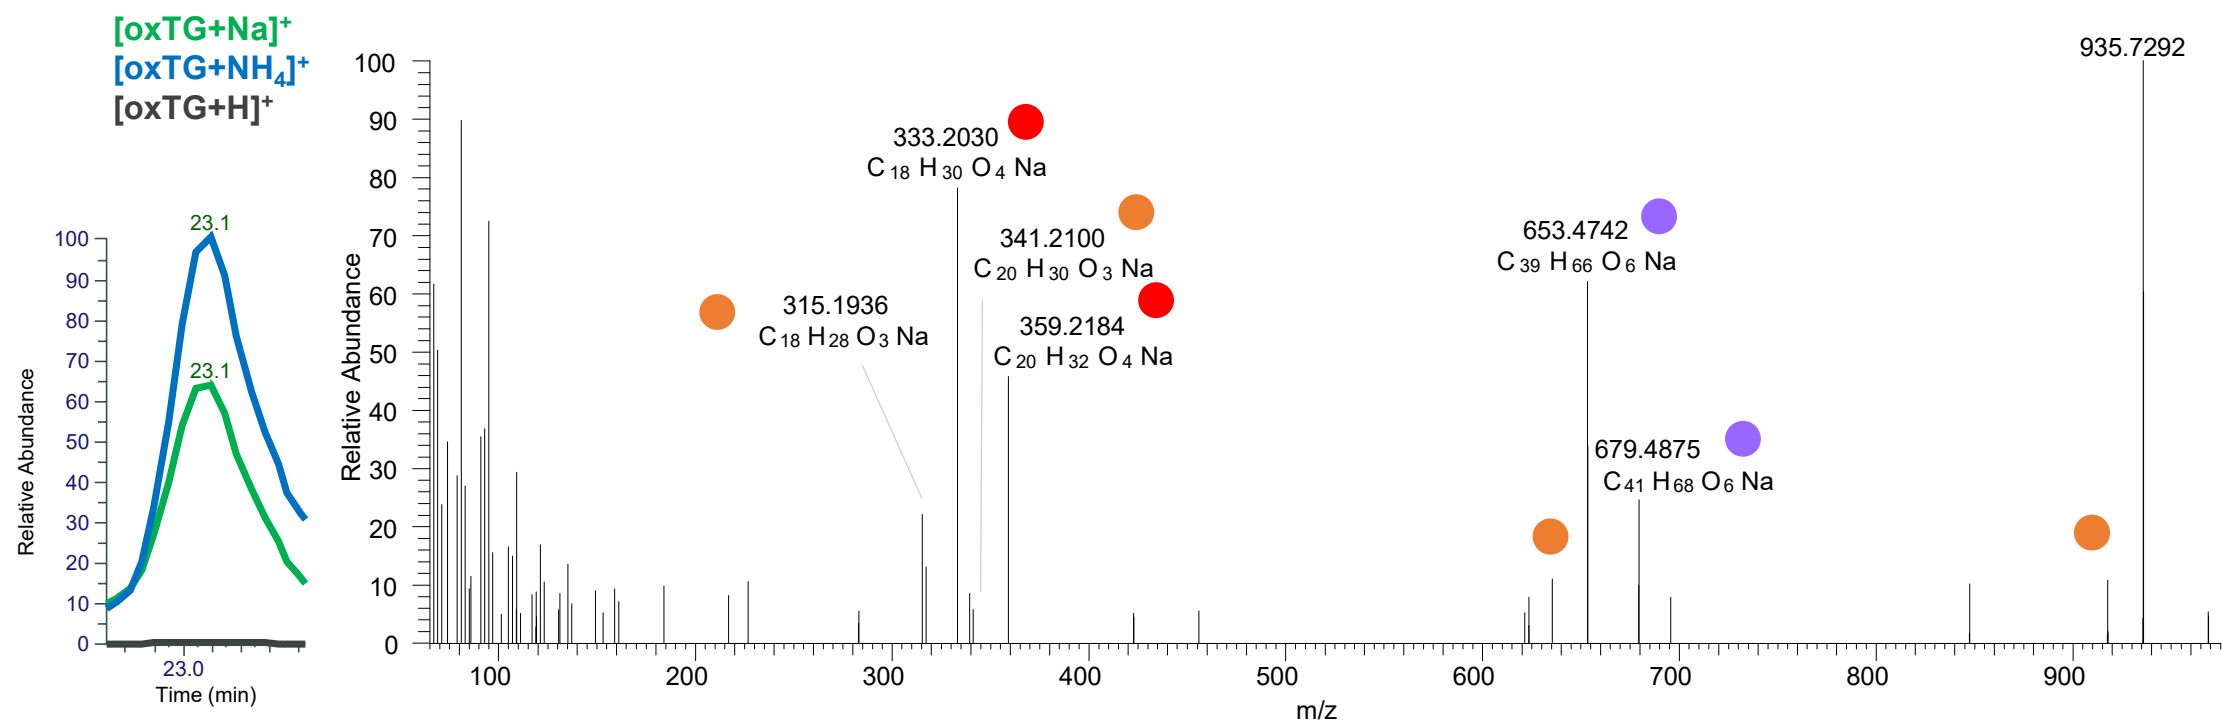

TG(18:1\_18:1\_18:3<OOH{13}>)  
 TG(18:1\_18:2\_18:2<OOH{13}>)  
 TG(16:0\_18:1\_20:4<OH,O>)  
 RT 23.1

[oxTG+Na]<sup>+</sup>

XIC 935.7310 NL: 8.64E5

- Fragments containing oxFAs
- Fragments related to water loss
- Fragments not containing oxFAs
- Fragments related to other oxLPPs
- Position-specific fragments
- Fragments related to FA loss
- Fragments related to oxFA loss

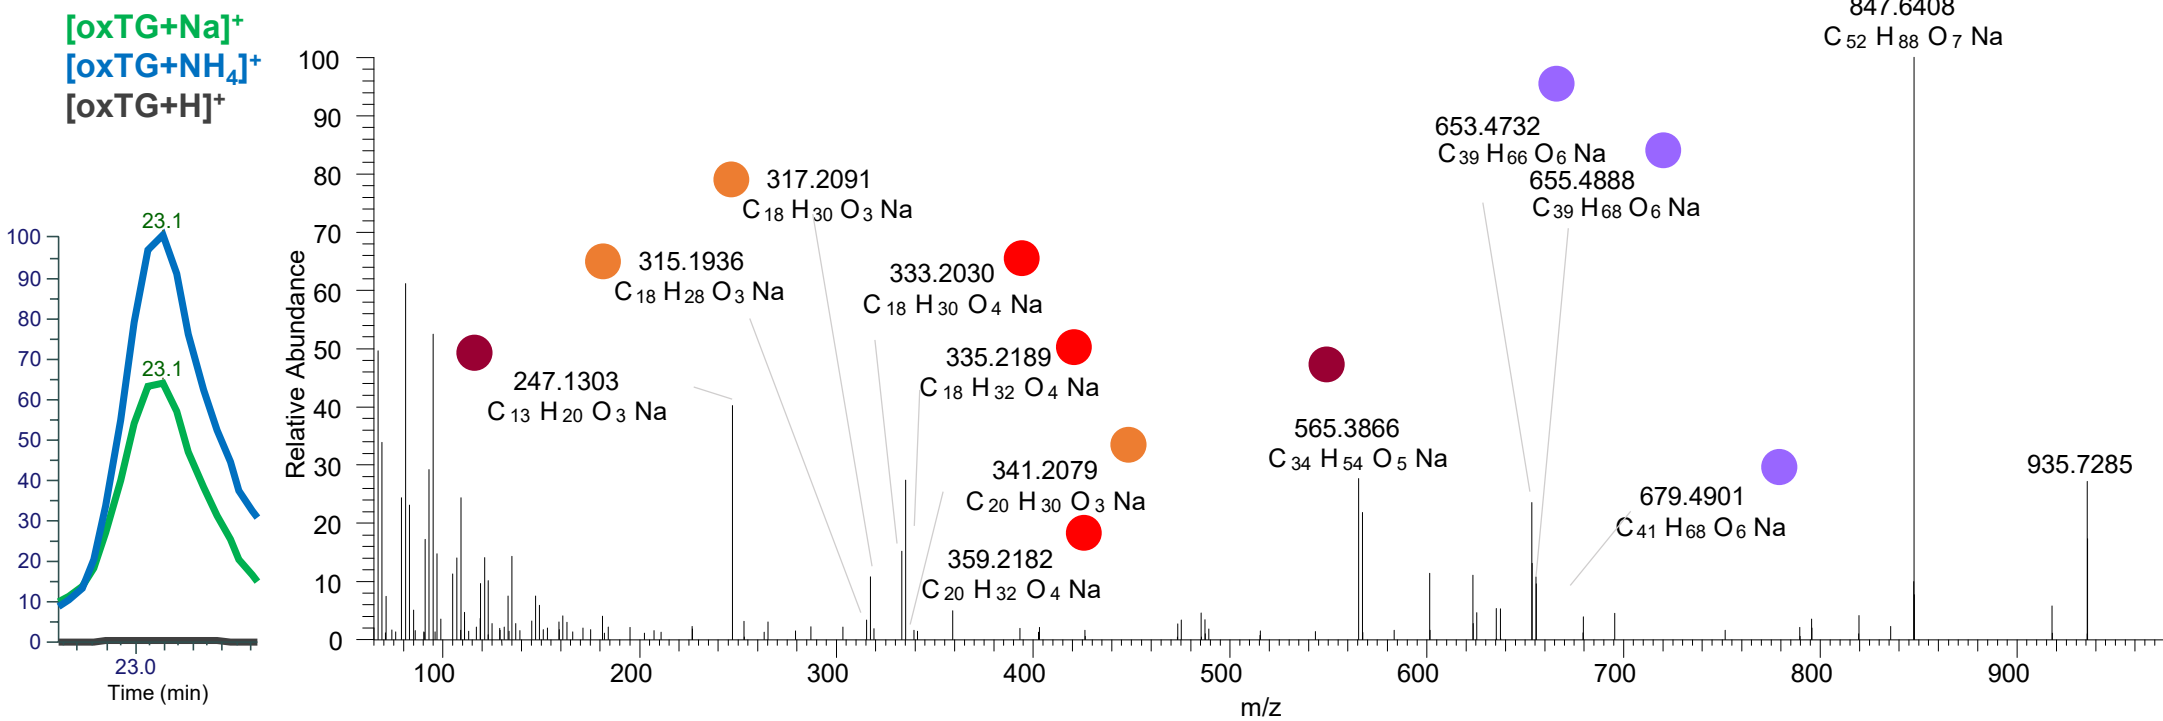



# TG(18:0\_18:2<O>\_18:2<O>)

## RT 21.0

[oxTG+Na]<sup>+</sup>

XIC 937.7467 NL: 7.18E4

- Fragments containing oxFAs
- Fragments related to water loss
- Fragments not containing oxFAs
- Fragments related to other oxLPPs
- Position-specific fragments
- Fragments related to FA loss
- Fragments related to oxFA loss

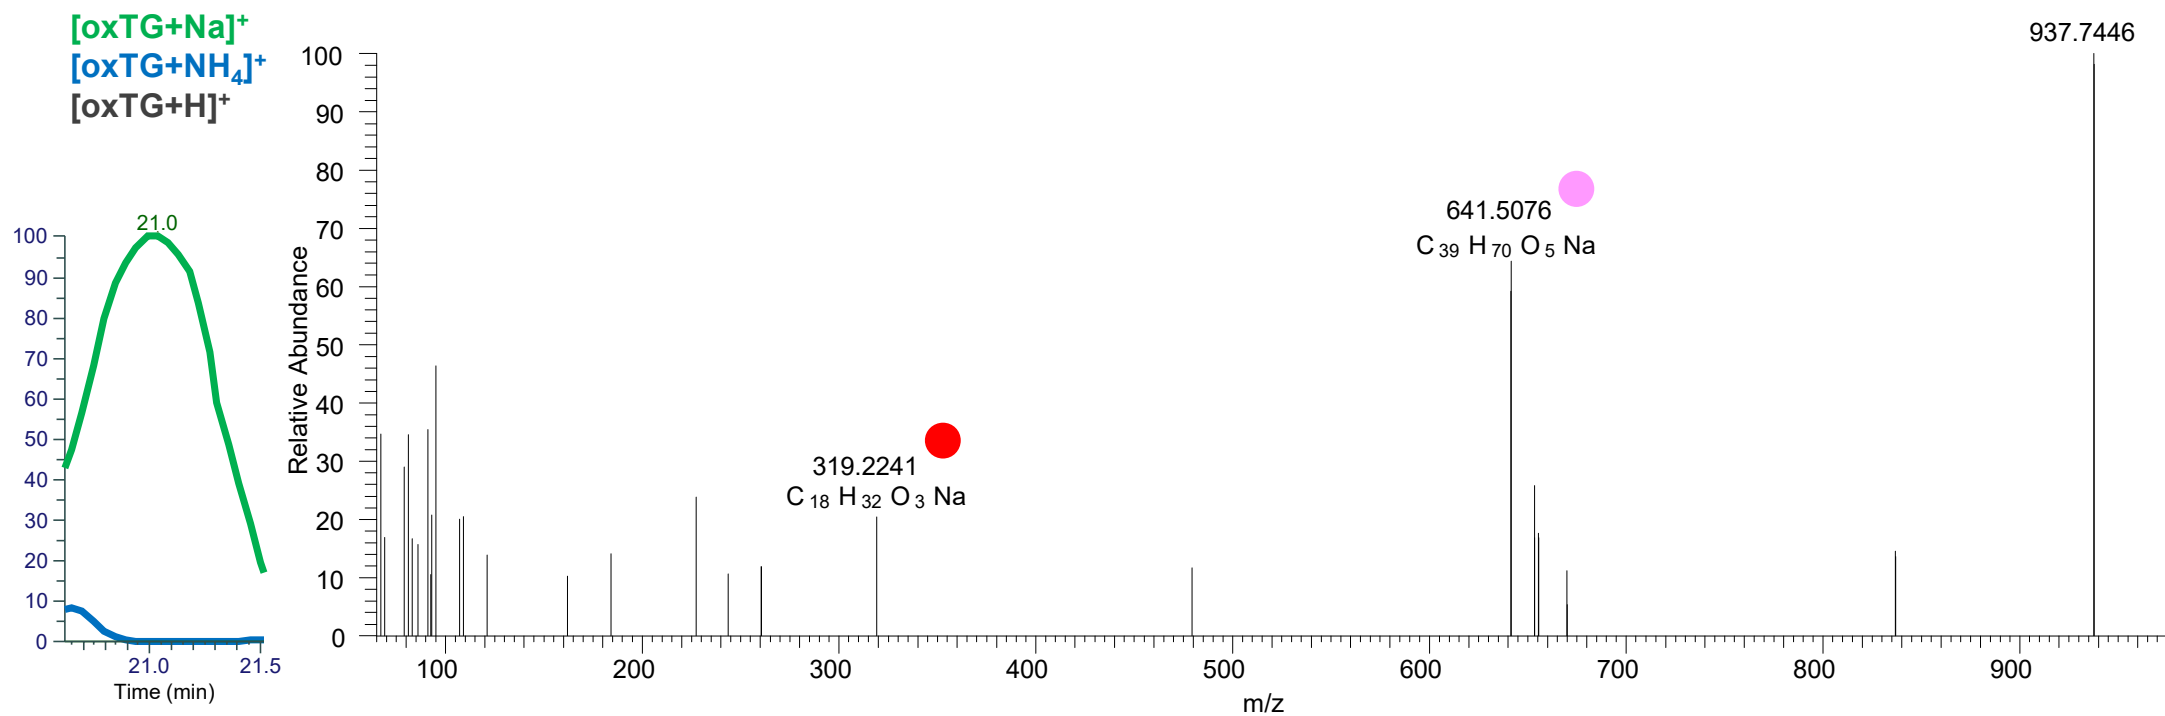

TG(16:0\_18:1\_20:3<2O>)  
TG(18:1\_18:1\_18:2<OH,O>)  
RT 22.8

[oxTG+Na]<sup>+</sup>

XIC 937.7467 NL: 8.25E4

- Fragments containing oxFAs
- Fragments related to water loss
- Fragments not containing oxFAs
- Fragments related to other oxLPPs
- Position-specific fragments
- Fragments related to FA loss
- Fragments related to oxFA loss

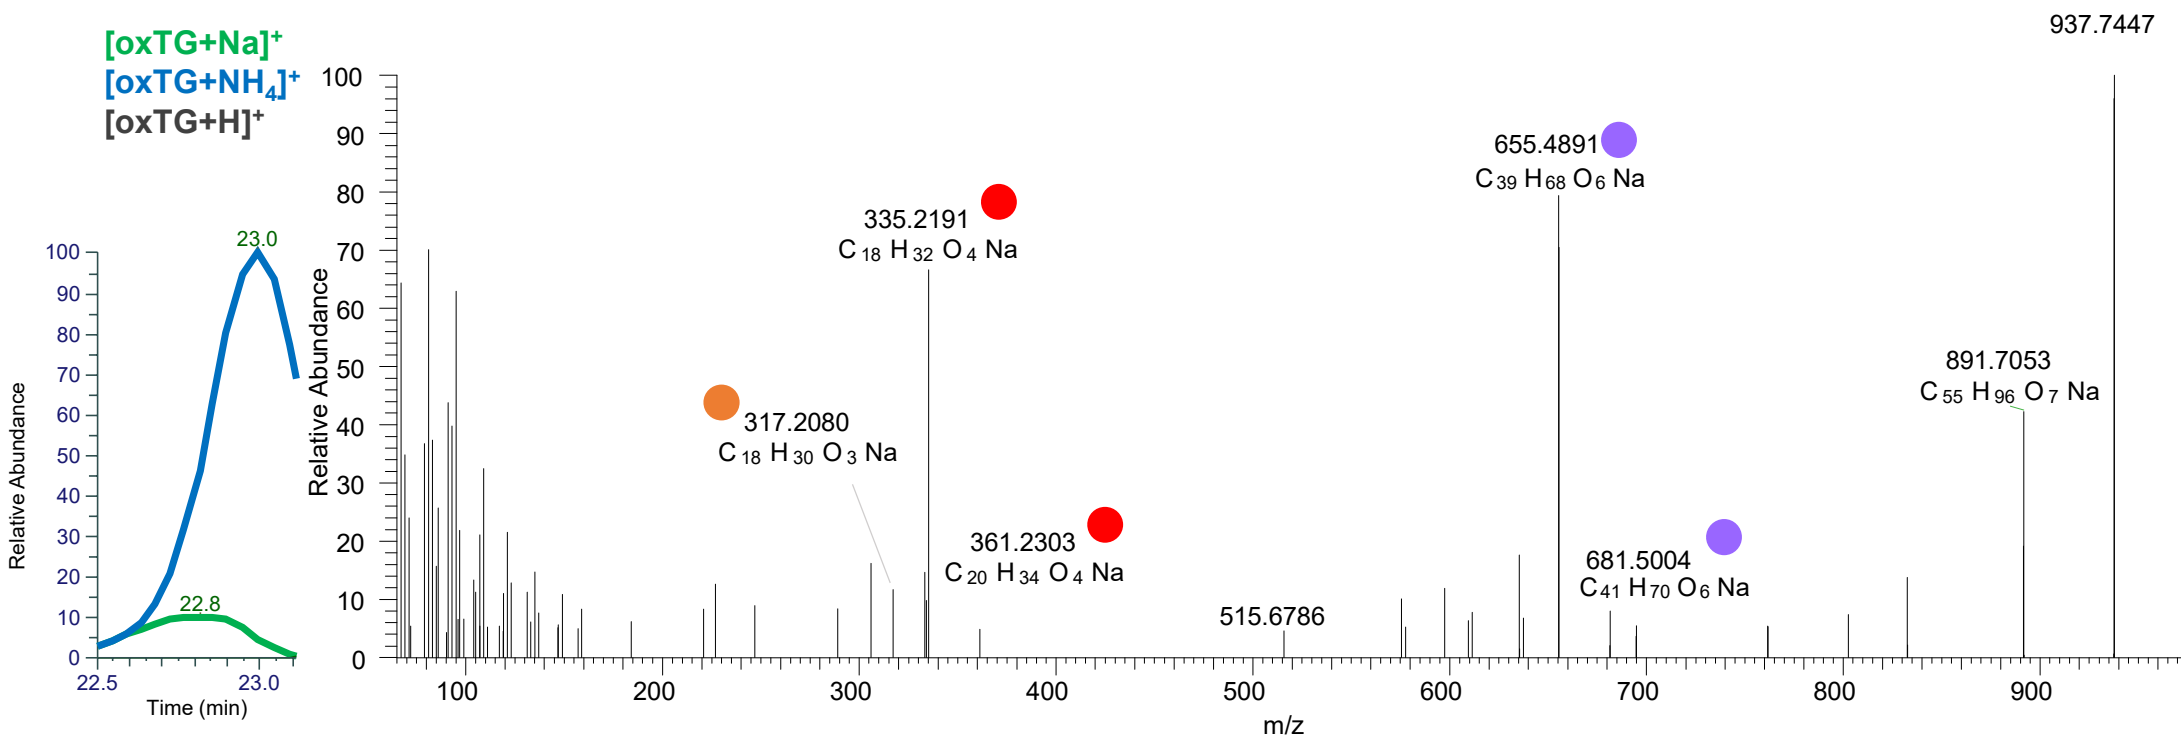

# TG(18:1\_18:1\_18:2<OOH{13}>)

RT 23.6

[oxTG+Na]<sup>+</sup>

XIC 937.7467 NL: 2.48E6

- Fragments containing oxFAs
- Fragments related to water loss
- Fragments not containing oxFAs
- Fragments related to other oxLPPs
- Position-specific fragments
- Fragments related to FA loss
- Fragments related to oxFA loss

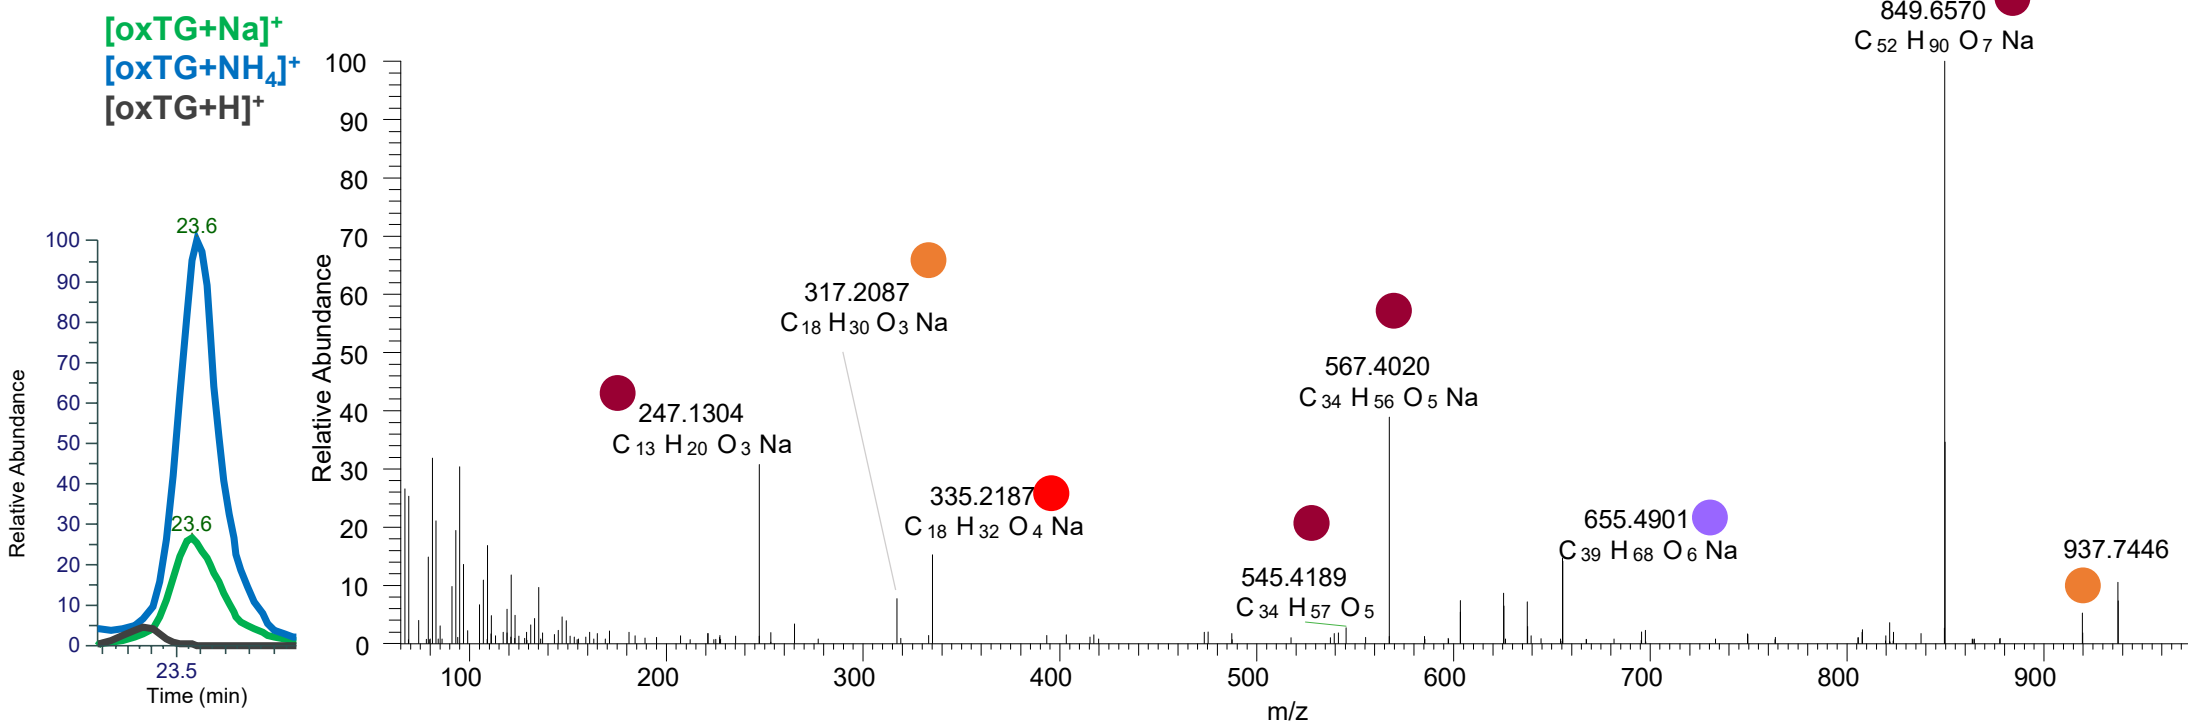

TG(16:0\_18:2\_20:4<3O>)  
 TG(16:0\_18:1\_20:5<3O>)  
 TG(18:1\_18:1\_18:4<3O>)  
 RT 21.3

[oxTG+Na]<sup>+</sup>

XIC 949.7103 NL: 4.15E4

- Fragments containing oxFAs
- Fragments related to water loss
- Fragments not containing oxFAs
- Fragments related to other oxLPPs
- Position-specific fragments
- Fragments related to FA loss
- Fragments related to oxFA loss

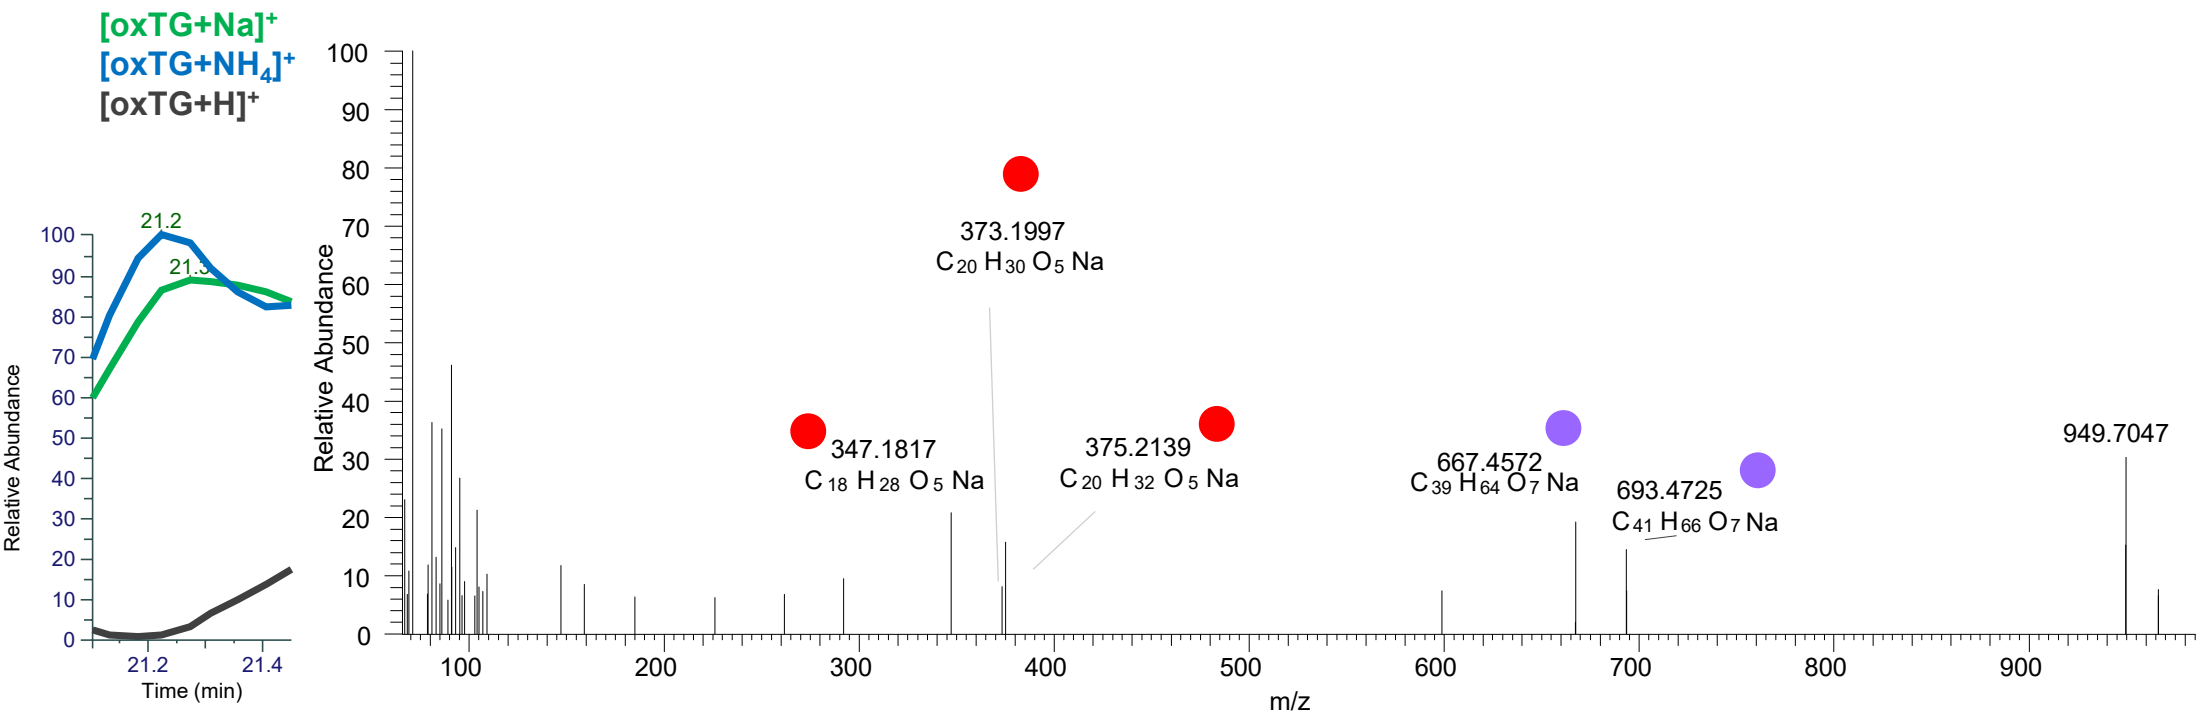

# TG(16:0\_18:1\_20:5<3O>)

RT 21.8

[oxTG+Na]<sup>+</sup>

XIC 949.7103 NL: 4.45E4

- Fragments containing oxFAs
- Fragments related to water loss
- Fragments not containing oxFAs
- Fragments related to other oxLPPs
- Position-specific fragments
- Fragments related to FA loss
- Fragments related to oxFA loss

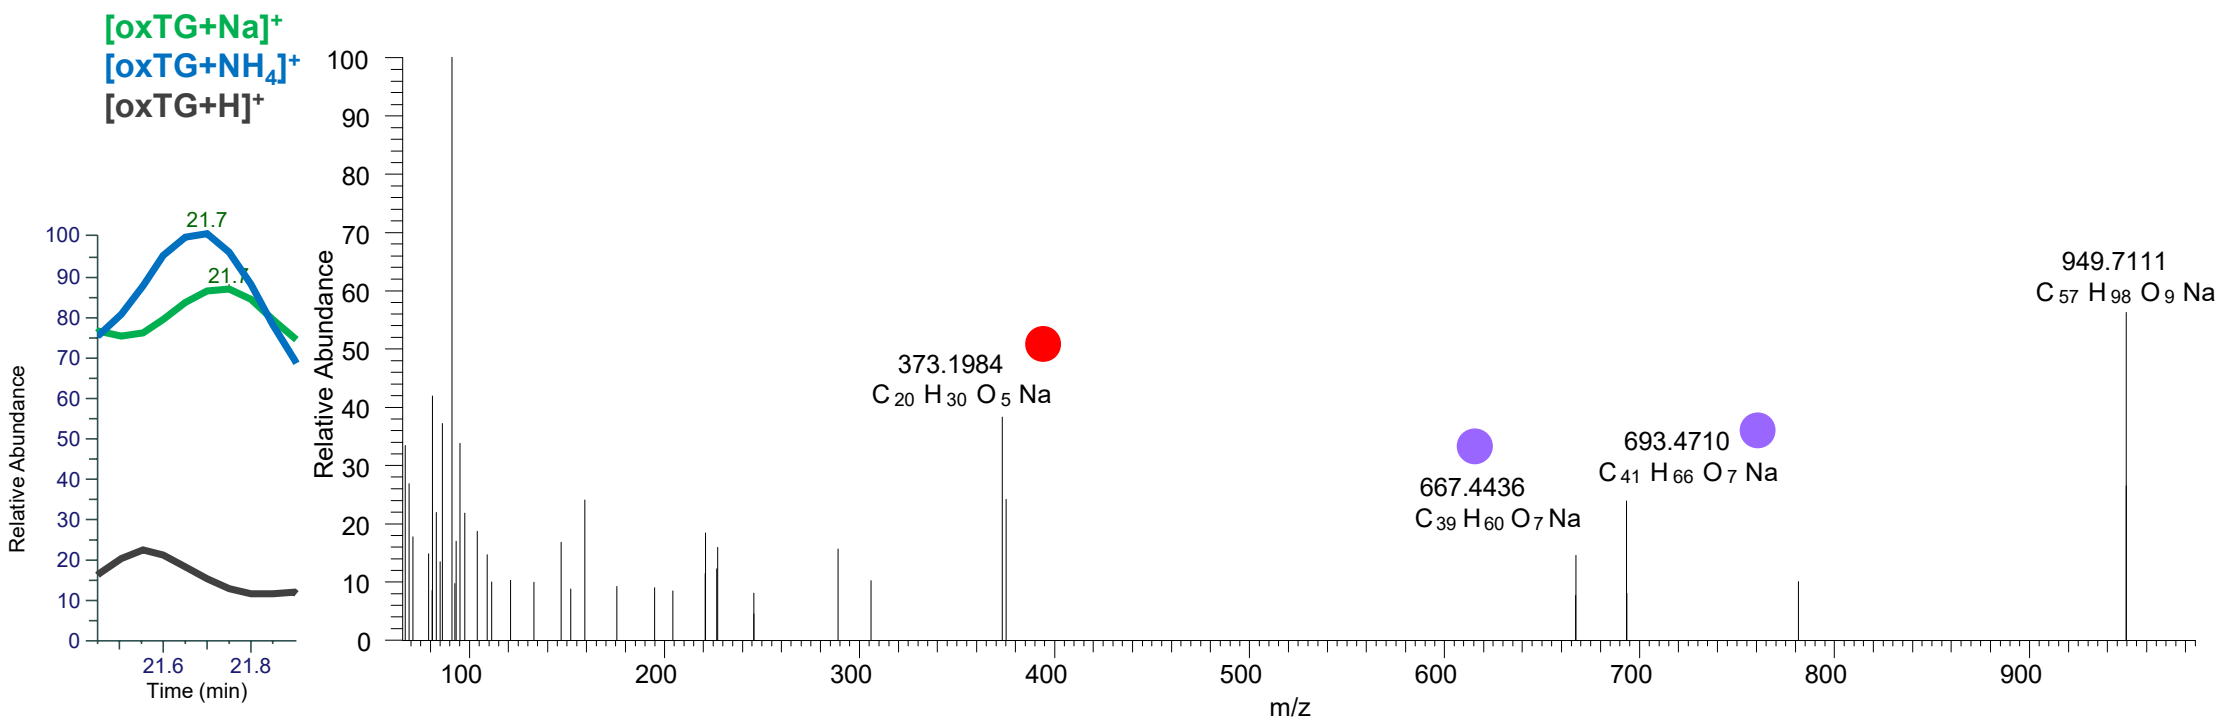

# TG(18:1\_18:2<OH>\_18:2<OOH{13}>)

RT 20.1

[oxTG+Na]<sup>+</sup>

XIC 951.7259 NL: 3.66E5

- Fragments containing oxFAs
- Fragments related to water loss
- Fragments not containing oxFAs
- Fragments related to other oxLPPs
- Position-specific fragments
- Fragments related to FA loss
- Fragments related to oxFA loss

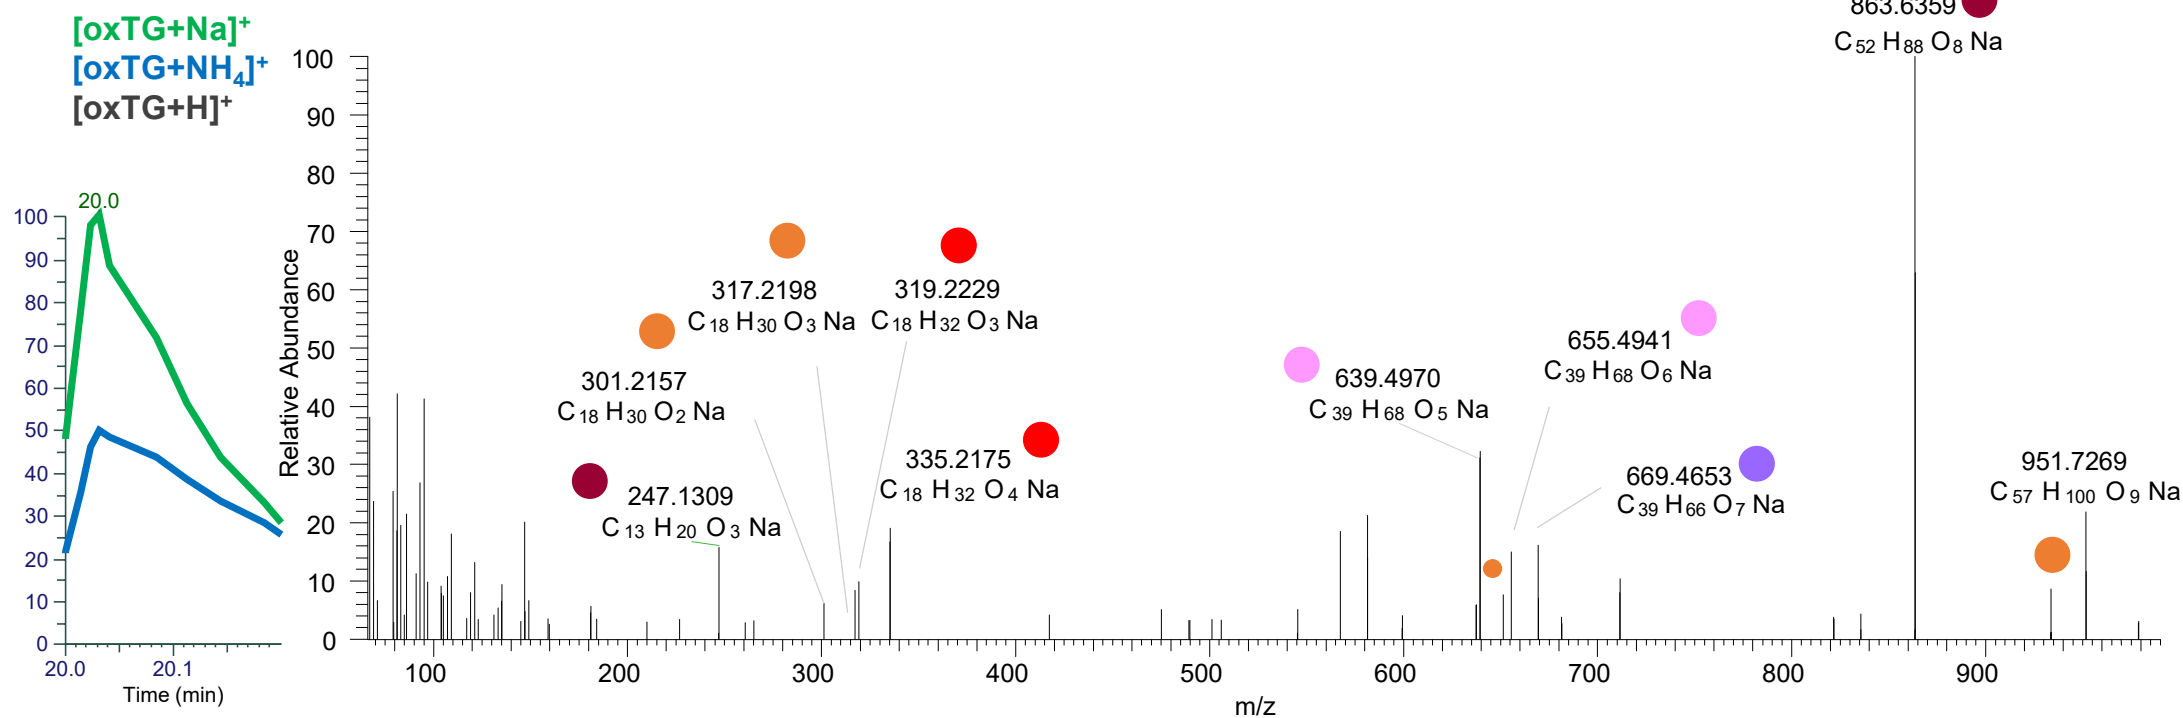

# TG(18:1\_18:1\_18:3<3O>)

## RT 21.1

[oxTG+Na]<sup>+</sup>

XIC 951.7259 NL: 3.39E4

- Fragments containing oxFAs
- Fragments related to water loss
- Fragments not containing oxFAs
- Fragments related to other oxLPPs
- Position-specific fragments
- Fragments related to FA loss
- Fragments related to oxFA loss

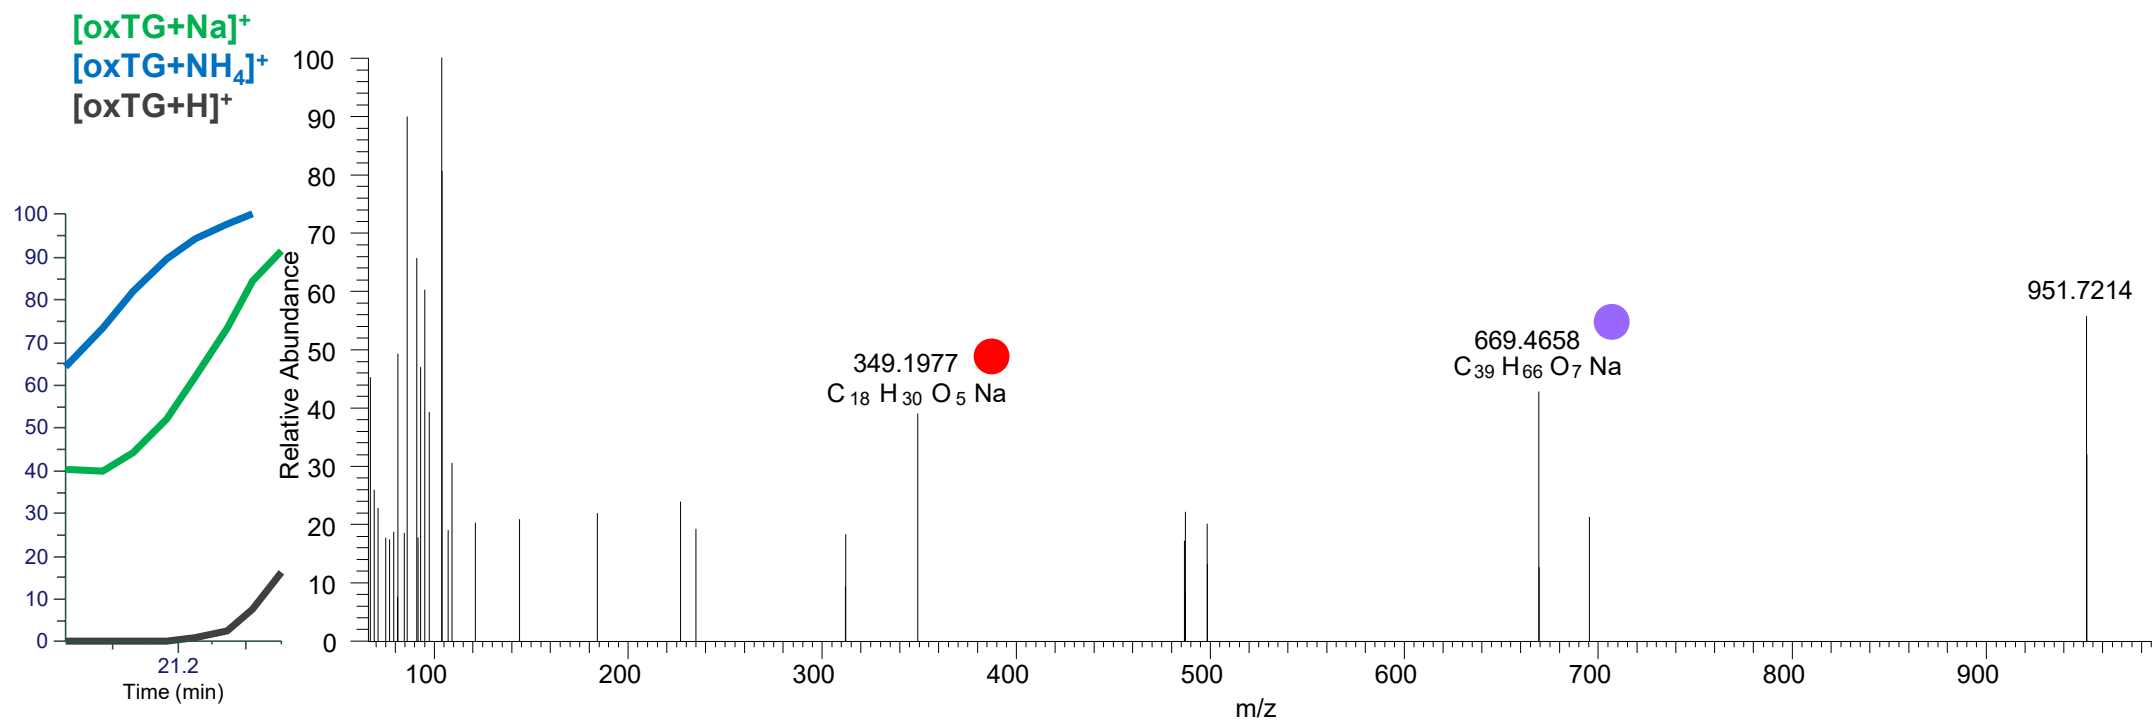

TG(18:1\_18:1\_18:3<3O>)  
TG(16:0\_18:1\_20:4<OH,2O>)  
RT 21.7

[oxTG+Na]<sup>+</sup>

XIC 951.7259 NL: 4.45E4

- Fragments containing oxFAs
- Fragments related to water loss
- Fragments not containing oxFAs
- Fragments related to other oxLPPs
- Position-specific fragments
- Fragments related to FA loss
- Fragments related to oxFA loss

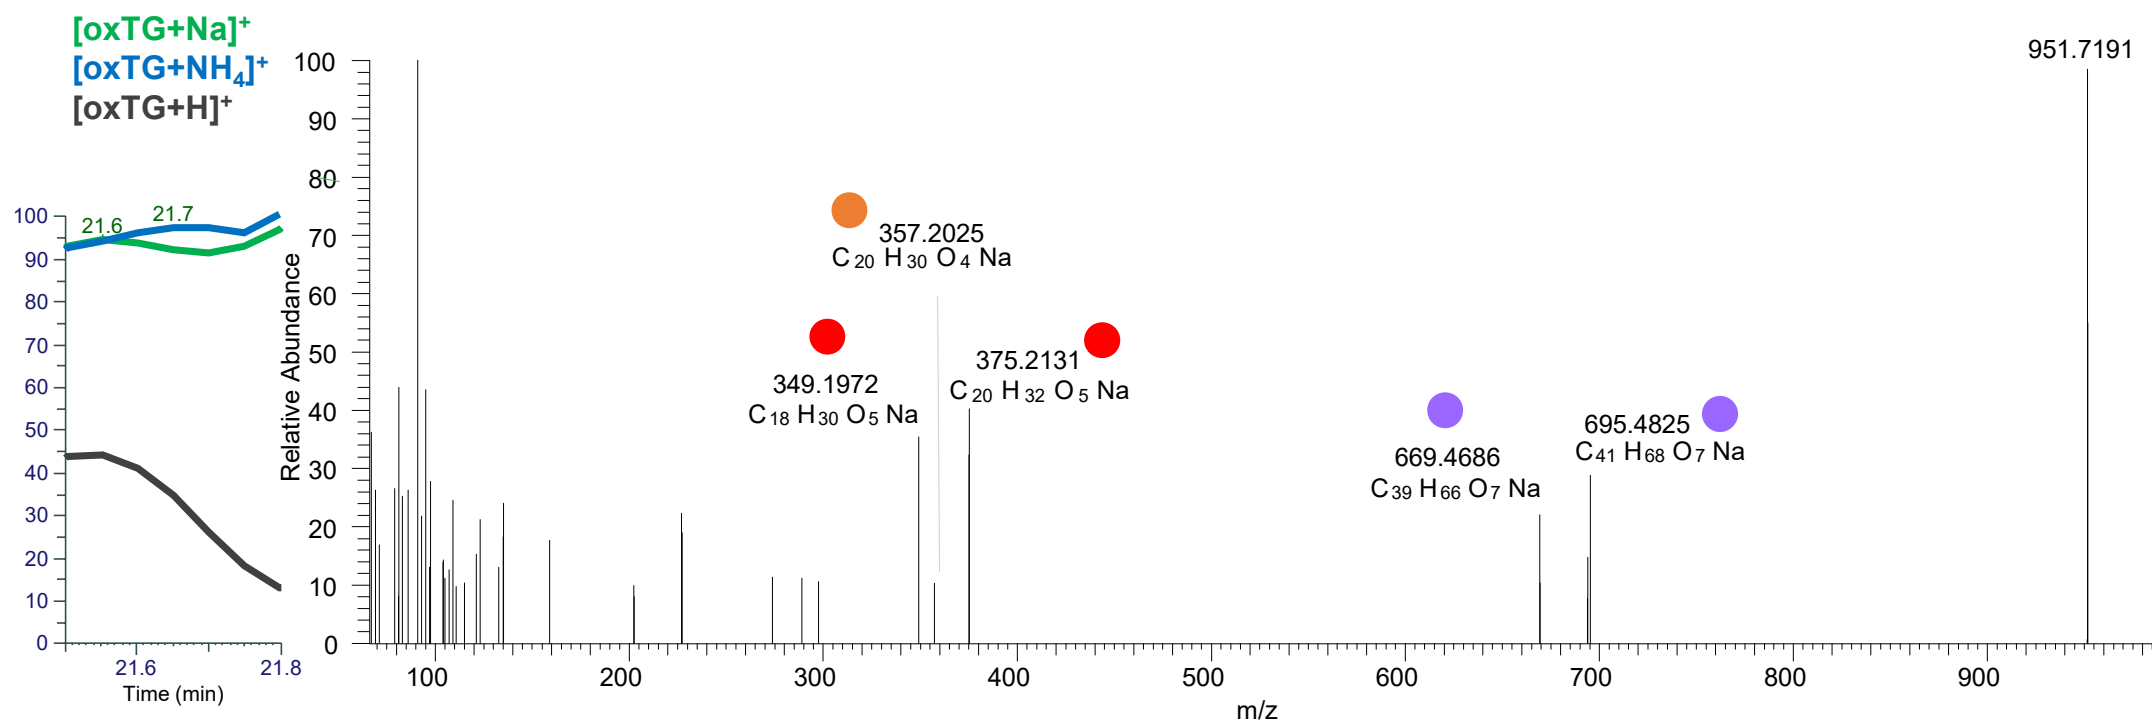



# TG(16:0\_18:1\_20:4<O,OOH{15}>) RT 22.0

[oxTG+Na]<sup>+</sup>

XIC 951.7259 NL: 7.27E4

- Fragments containing oxFAs
- Fragments related to water loss
- Fragments not containing oxFAs
- Fragments related to other oxLPPs
- Position-specific fragments
- Fragments related to FA loss
- Fragments related to oxFA loss

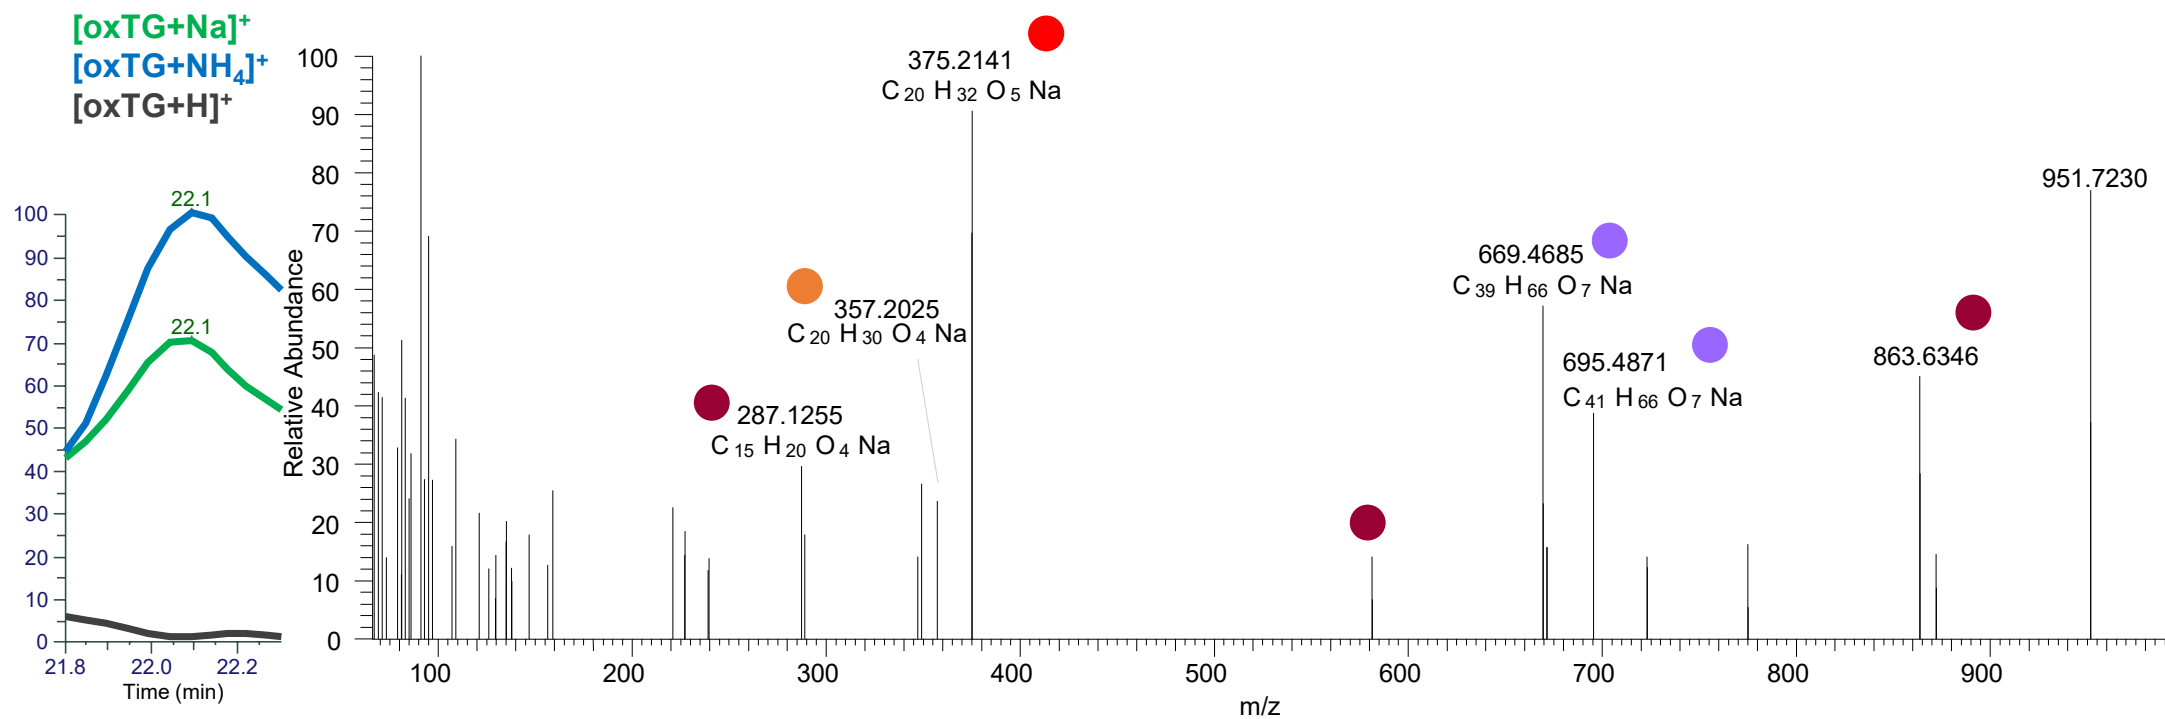

# TG(16:0\_18:1\_20:4<3O>)

## RT 22.2

[oxTG+Na]<sup>+</sup>

XIC 951.7259 NL: 7.27E4

- Fragments containing oxFAs
- Fragments related to water loss
- Fragments not containing oxFAs
- Fragments related to other oxLPPs
- Position-specific fragments
- Fragments related to FA loss
- Fragments related to oxFA loss

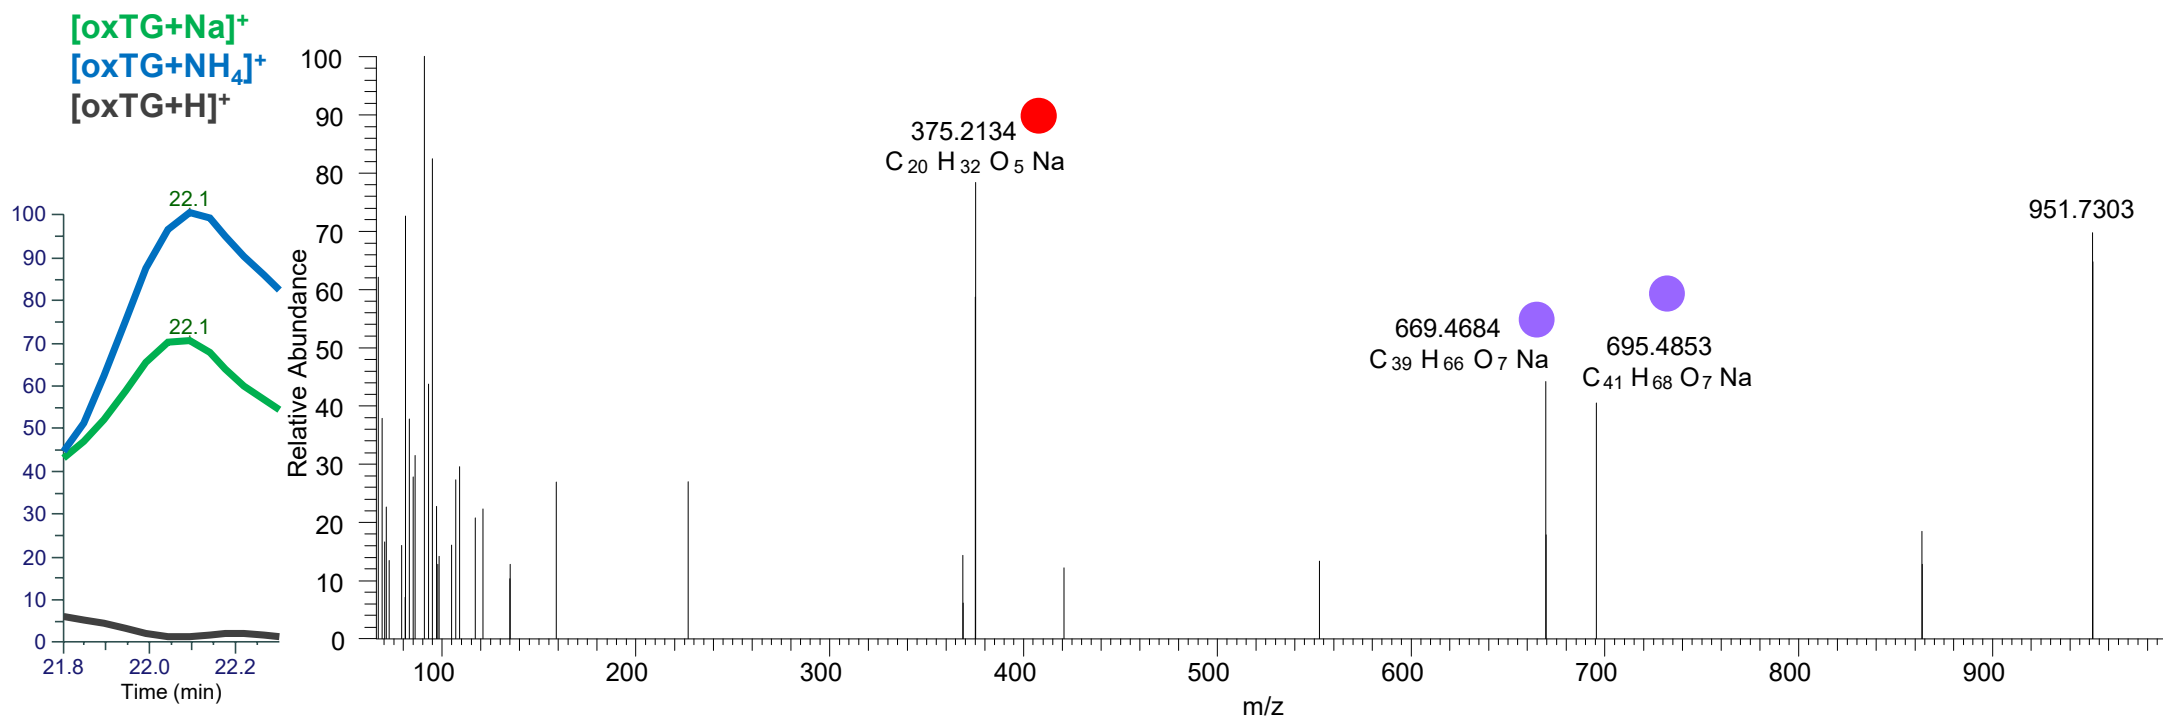

# TG(18:1\_18:1\_18:3<O,OOH{13}>) RT 22.8

[oxTG+Na]<sup>+</sup>

XIC 951.7259 NL: 3.52E4

- Fragments containing oxFAs
- Fragments related to water loss
- Fragments not containing oxFAs
- Fragments related to other oxLPPs
- Position-specific fragments
- Fragments related to FA loss
- Fragments related to oxFA loss

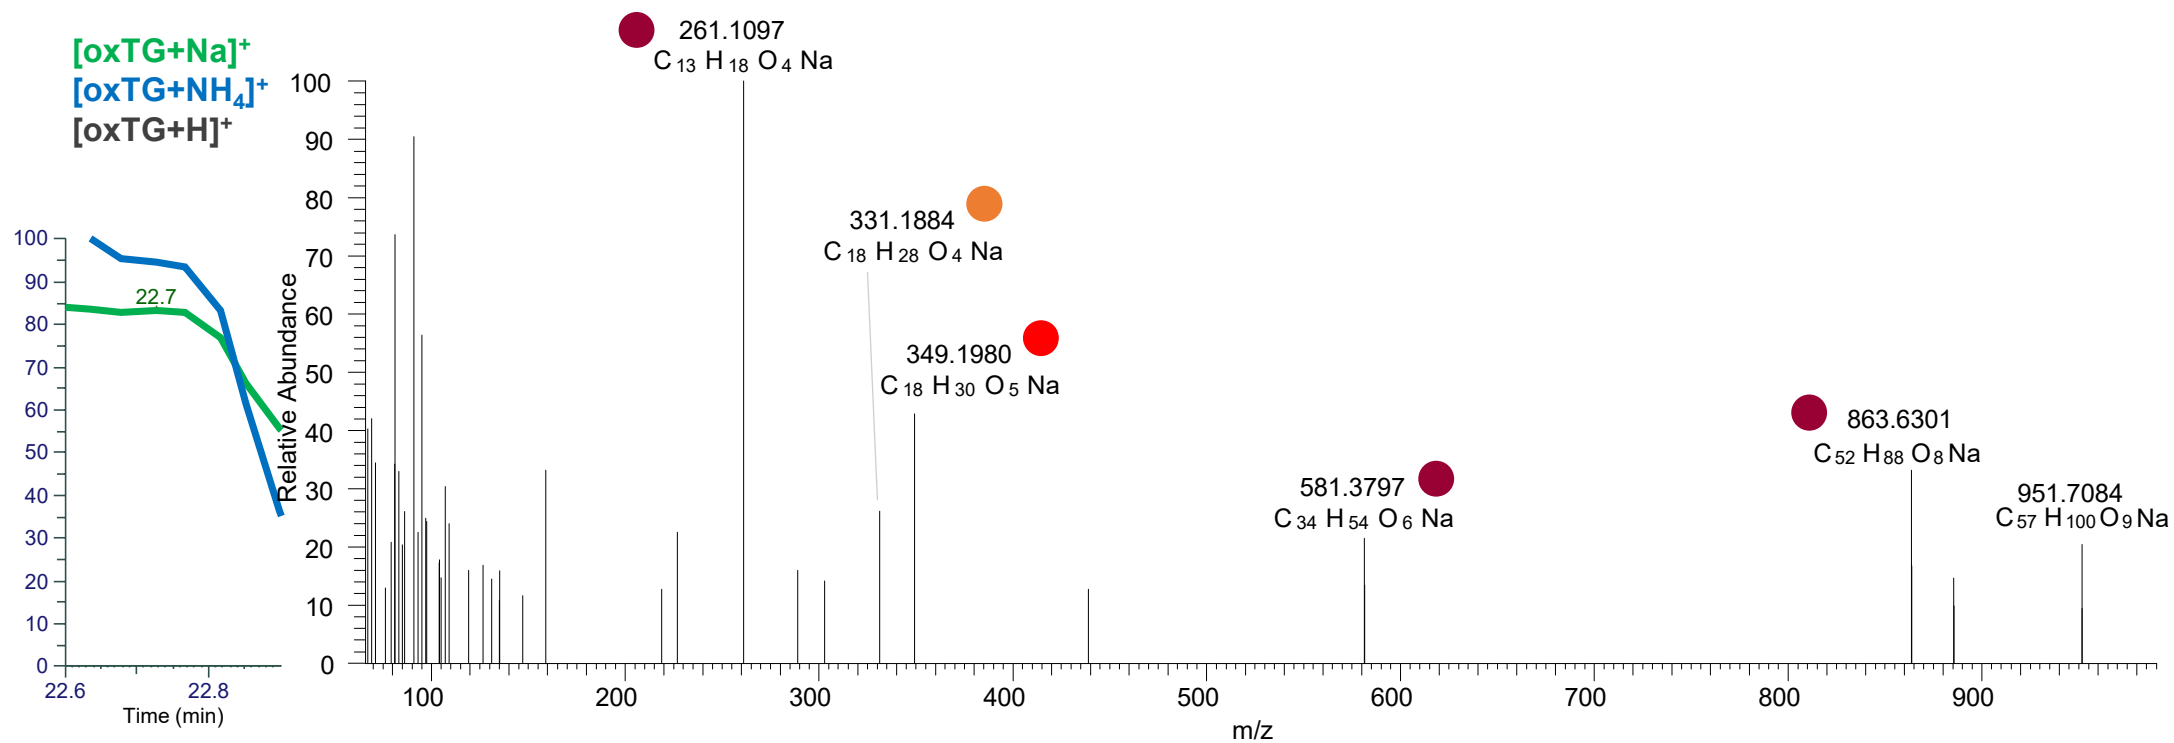

Supplement: 41467_2022_33225_MOESM11_ESM.pdf [file 41467_2022_33225_MOESM11_ESM.pdf]
